# Supplementary material for: Structure and size of complete hydration shells of metal ions and inorganic anions in aqueous solution
Source: Royal Society of Chemistry journal article supplement (doi:10.1039/d4dt01449a), 2024-01-01
Supplement: d4dt01449a1.pdf [file d4dt01449a1.pdf]

## **Structure and Size of Complete Hydration Shells of Metal Ions and Inorganic Anions in Aqueous Solution**

Ingmar Persson

Department of Molecular Sciences, Swedish University of Agricultural Sciences, P.O.Box  
7015, SE-750 07 Uppsala, Sweden.

Electronic Supplementary Information

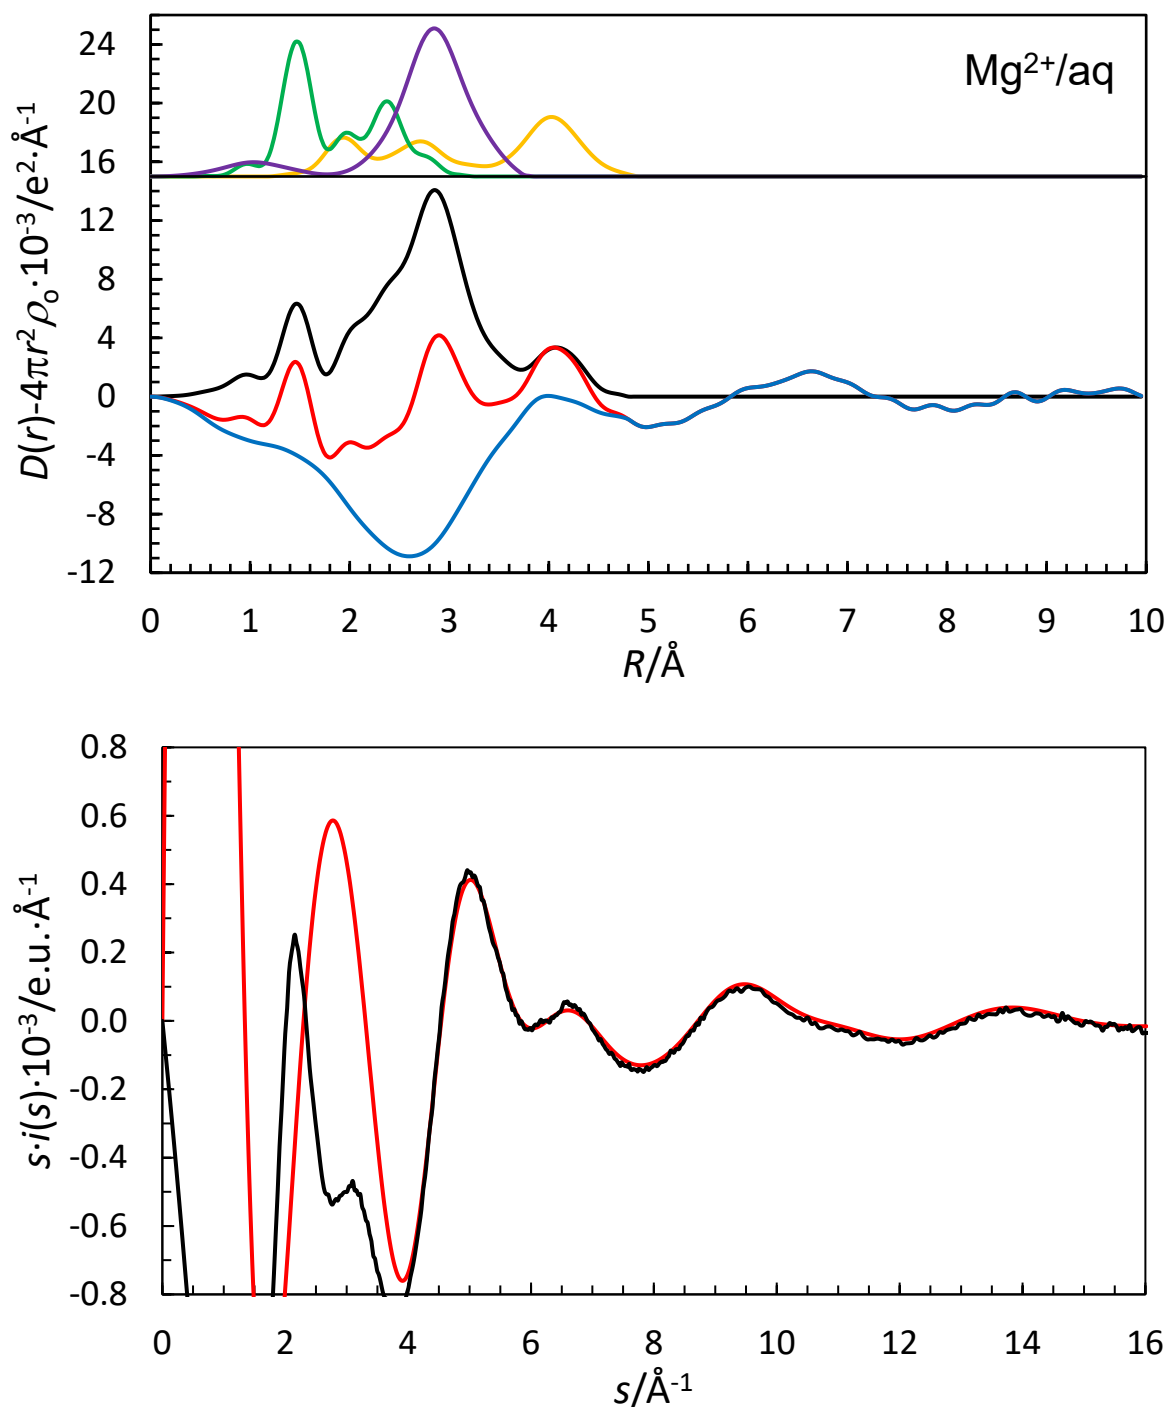

**Figure S1.** (Top) LAXS radial distribution curves for a  $1.50 \text{ mol} \cdot \text{dm}^{-3}$  aqueous perchloric acidic solution of magnesium(II) perchlorate. Upper part: Separate model contributions (offset: 15) of the hydrated magnesium ion (yellow line), the hydrated perchlorate ion (green line) and aqueous bulk (purple line). (Middle) Experimental RDF:  $D(r) - 4\pi r^2 \rho_0$  (black line); sum of model contributions (red line); difference (blue line). (Bottom) Reduced LAXS intensity functions  $s \cdot i(s)$  (black line); model  $s \cdot i_{\text{calc}}(s)$  (red line).

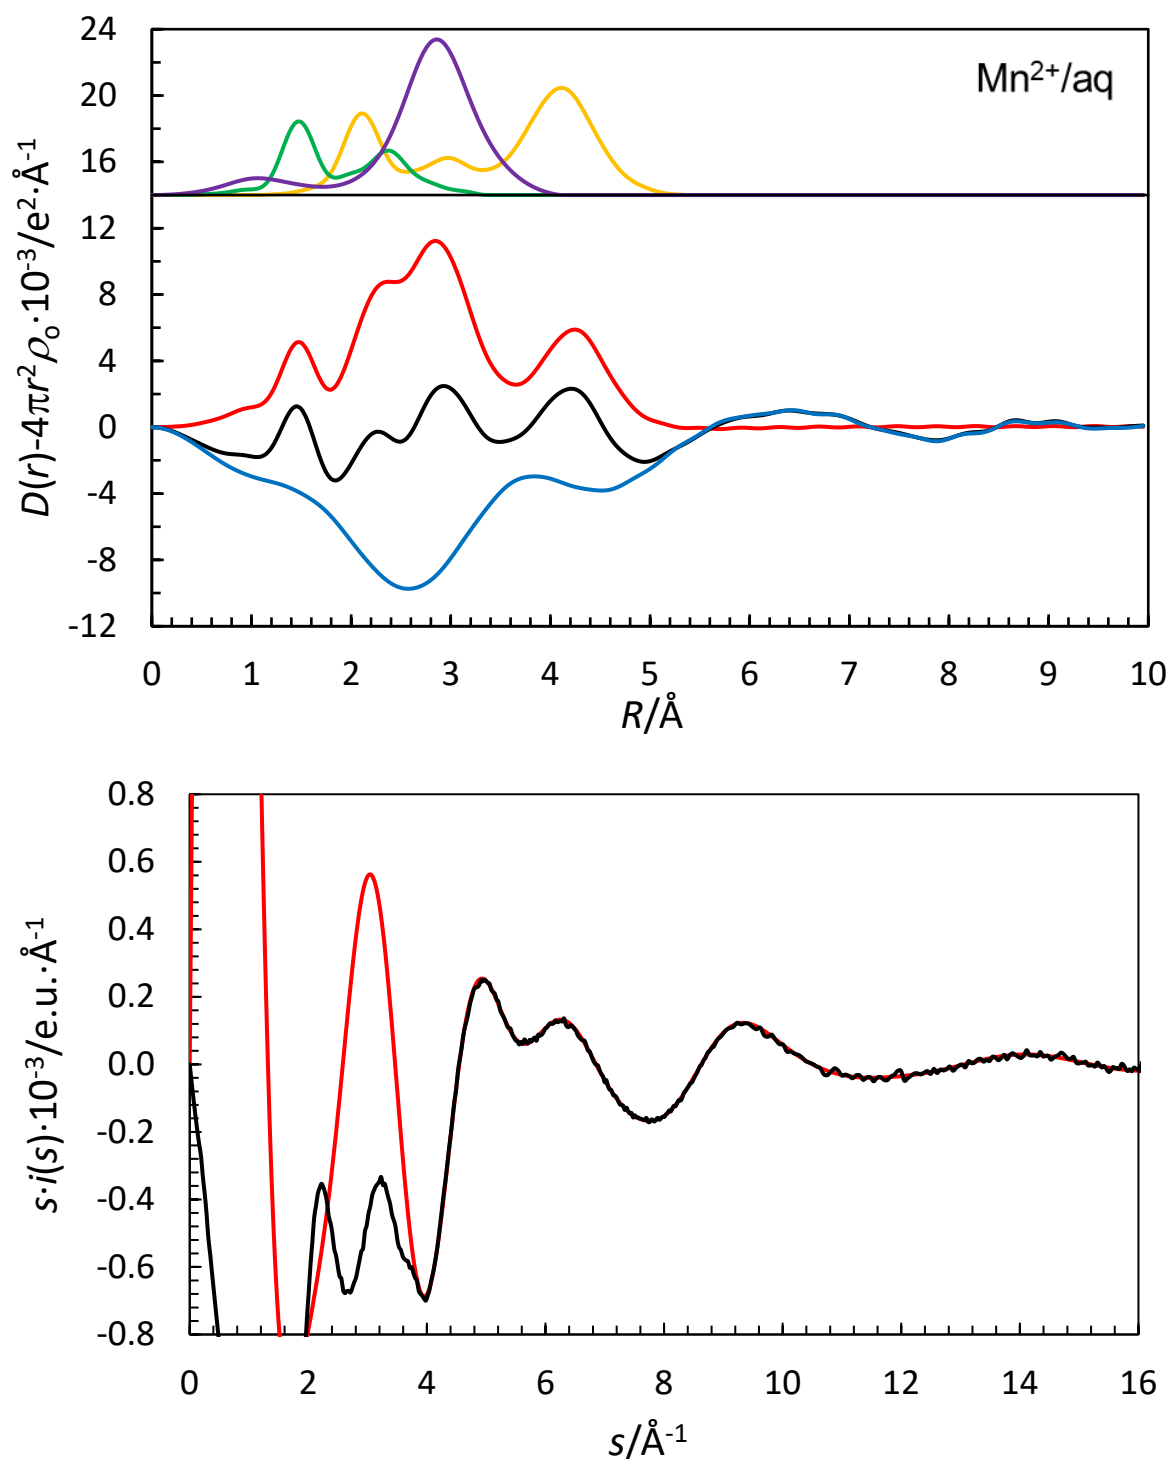

**Figure S2.** (Top) LAXS radial distribution curves for a  $1.50 \text{ mol} \cdot \text{dm}^{-3}$  aqueous perchloric acidic solution of manganese(II) perchlorate. Upper part: Separate model contributions (offset: 14) of the hydrated manganese(II) ion (yellow line), the hydrated perchlorate ion (green line) and aqueous bulk (purple line). (Middle) Experimental RDF:  $D(r) - 4\pi r^2 \rho_0$  (black line); sum of model contributions (red line); difference (blue line). (Bottom) Reduced LAXS intensity functions  $s \cdot i(s)$  (black line); model  $s \cdot i_{\text{calc}}(s)$  (red line).

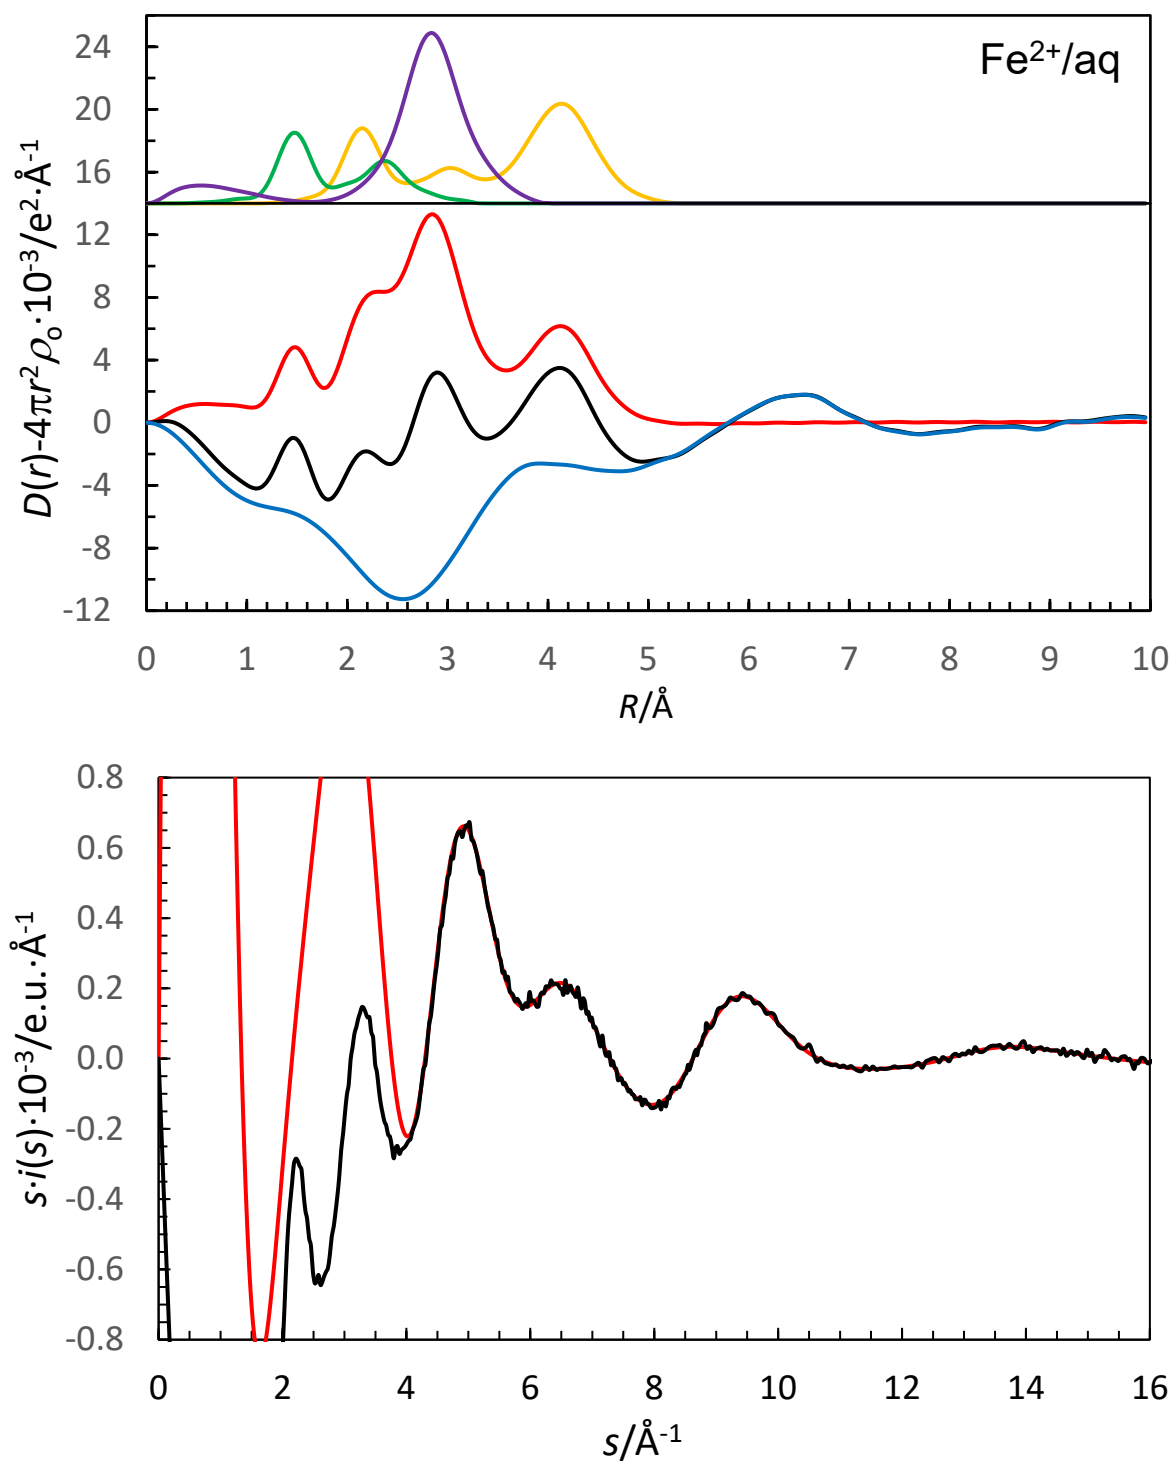

**Figure S3.** (Top) LAXS radial distribution curves for a  $1.50 \text{ mol} \cdot \text{dm}^{-3}$  aqueous perchloric acidic solution of iron(II) perchlorate. Upper part: Separate model contributions (offset: 14) of the hydrated iron(II) ion (yellow line), the hydrated perchlorate ion (green line) and aqueous bulk (purple line). (Middle) Experimental RDF:  $D(r) - 4\pi r^2 \rho_0$  (black line); sum of model contributions (red line); difference (blue line). (Bottom) Reduced LAXS intensity functions  $s \cdot i(s)$  (black line); model  $s \cdot i_{\text{calc}}(s)$  (red line).

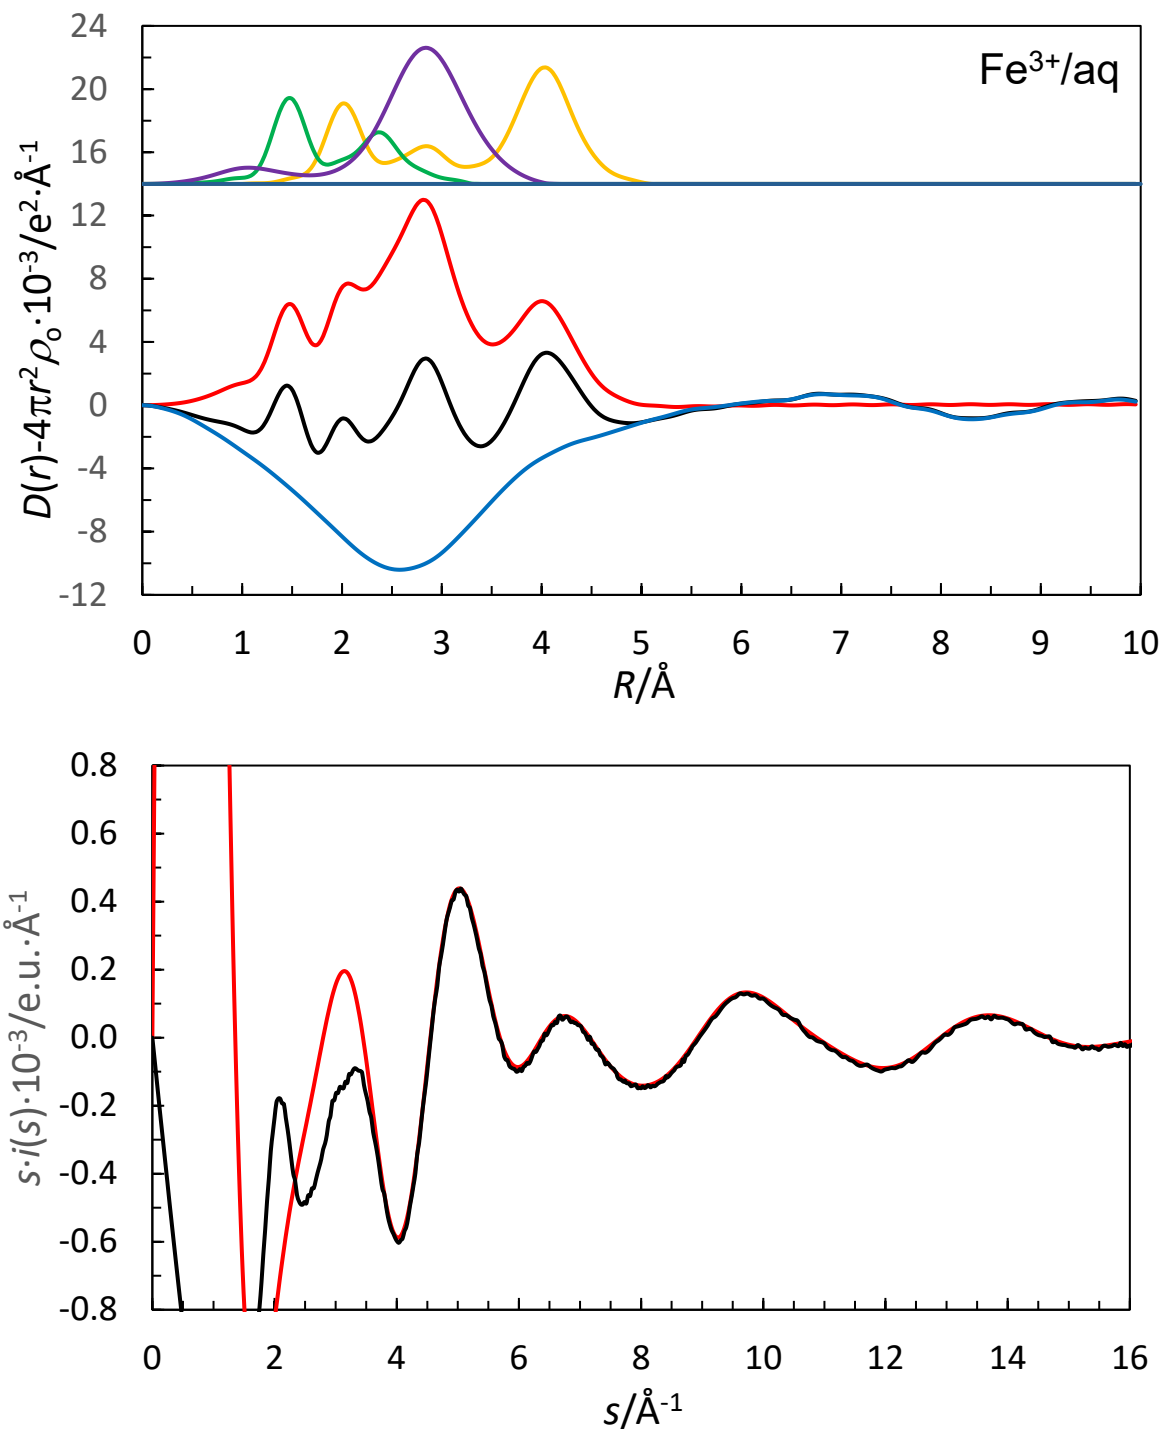

**Figure S4.** (Top) LAXS radial distribution curves for a  $1.50 \text{ mol} \cdot \text{dm}^{-3}$  aqueous perchloric acidic solution of iron(III) perchlorate. Upper part: Separate model contributions (offset: 14) of the hydrated iron(III) ion (yellow line), the hydrated perchlorate ion (green line) and aqueous bulk (purple line). (Middle) Experimental RDF:  $D(r) - 4\pi r^2 \rho_0$  (black line); sum of model contributions (red line); difference (blue line). (Bottom) Reduced LAXS intensity functions  $s \cdot i(s)$  (black line); model  $s \cdot i_{\text{calc}}(s)$  (red line).

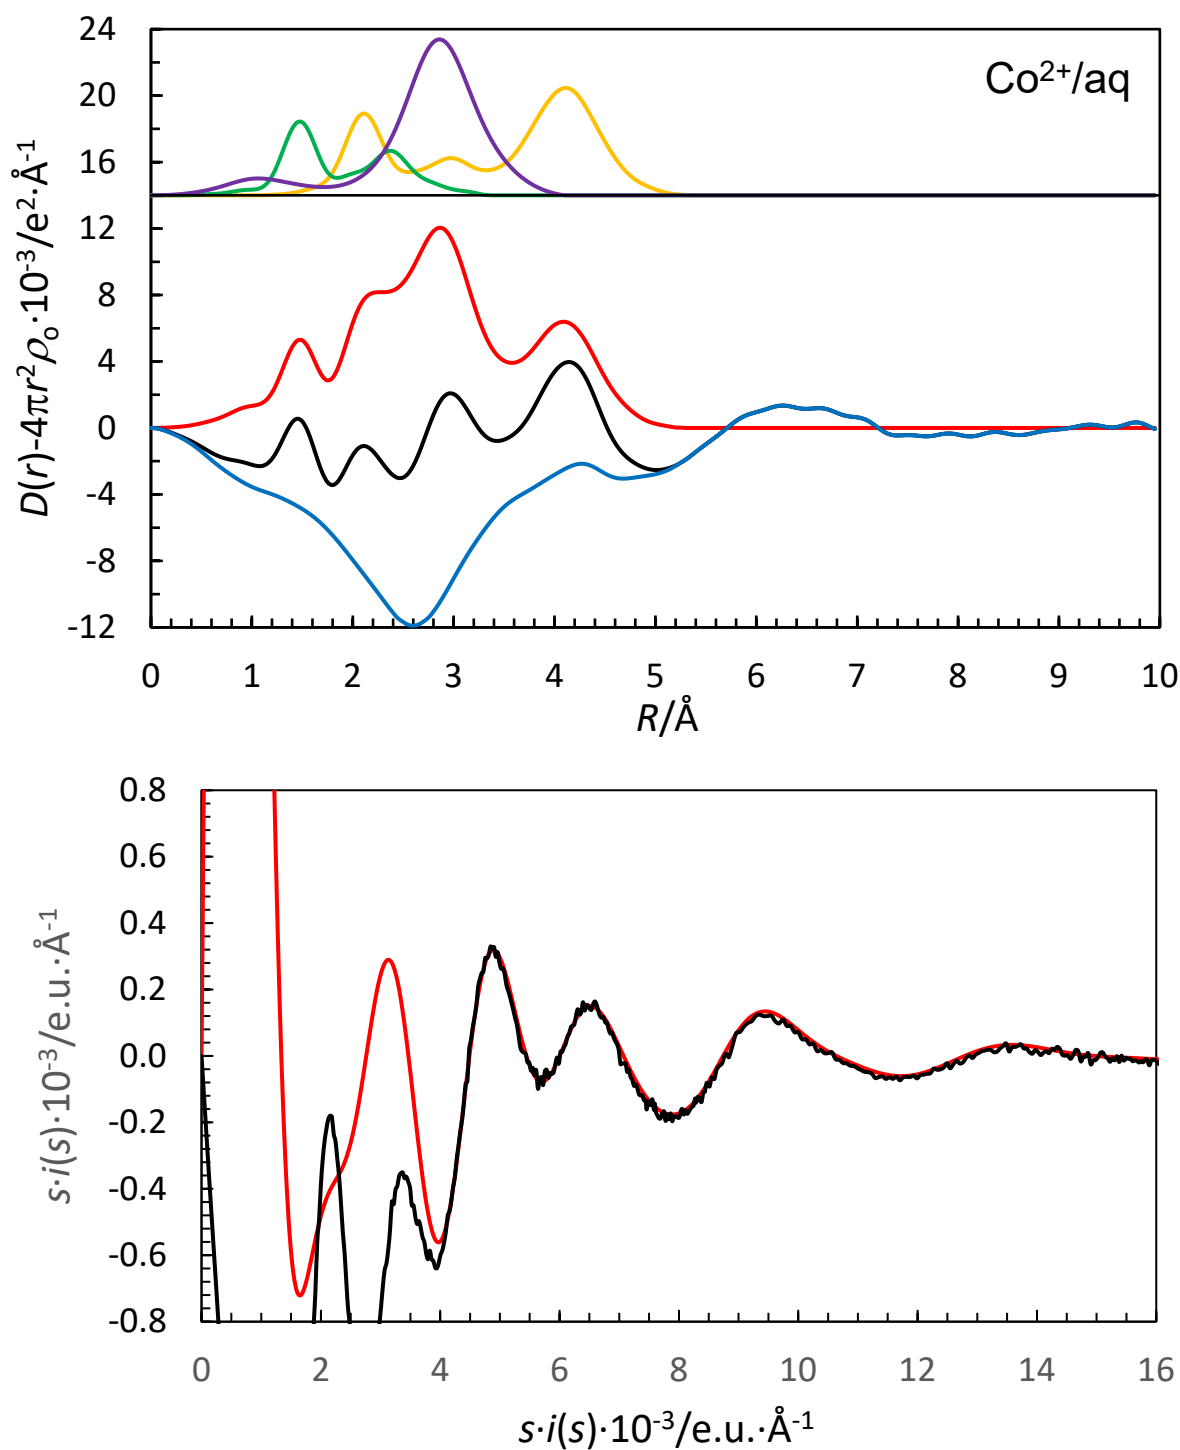

**Figure S5.** (Top) LAXS radial distribution curves for a 1.50 mol·dm<sup>-3</sup> aqueous perchloric acidic solution of cobalt(II) perchlorate. Upper part: Separate model contributions (offset: 14) of the hydrated cobalt(II) ion (yellow line), the hydrated perchlorate ion (green line) and aqueous bulk (purple line). (Middle) Experimental RDF:  $D(r) - 4\pi r^2 \rho_0$  (black line); sum of model contributions (red line); difference (blue line). (Bottom) Reduced LAXS intensity functions  $s \cdot i(s)$  (black line); model  $s \cdot i_{\text{calc}}(s)$  (red line).

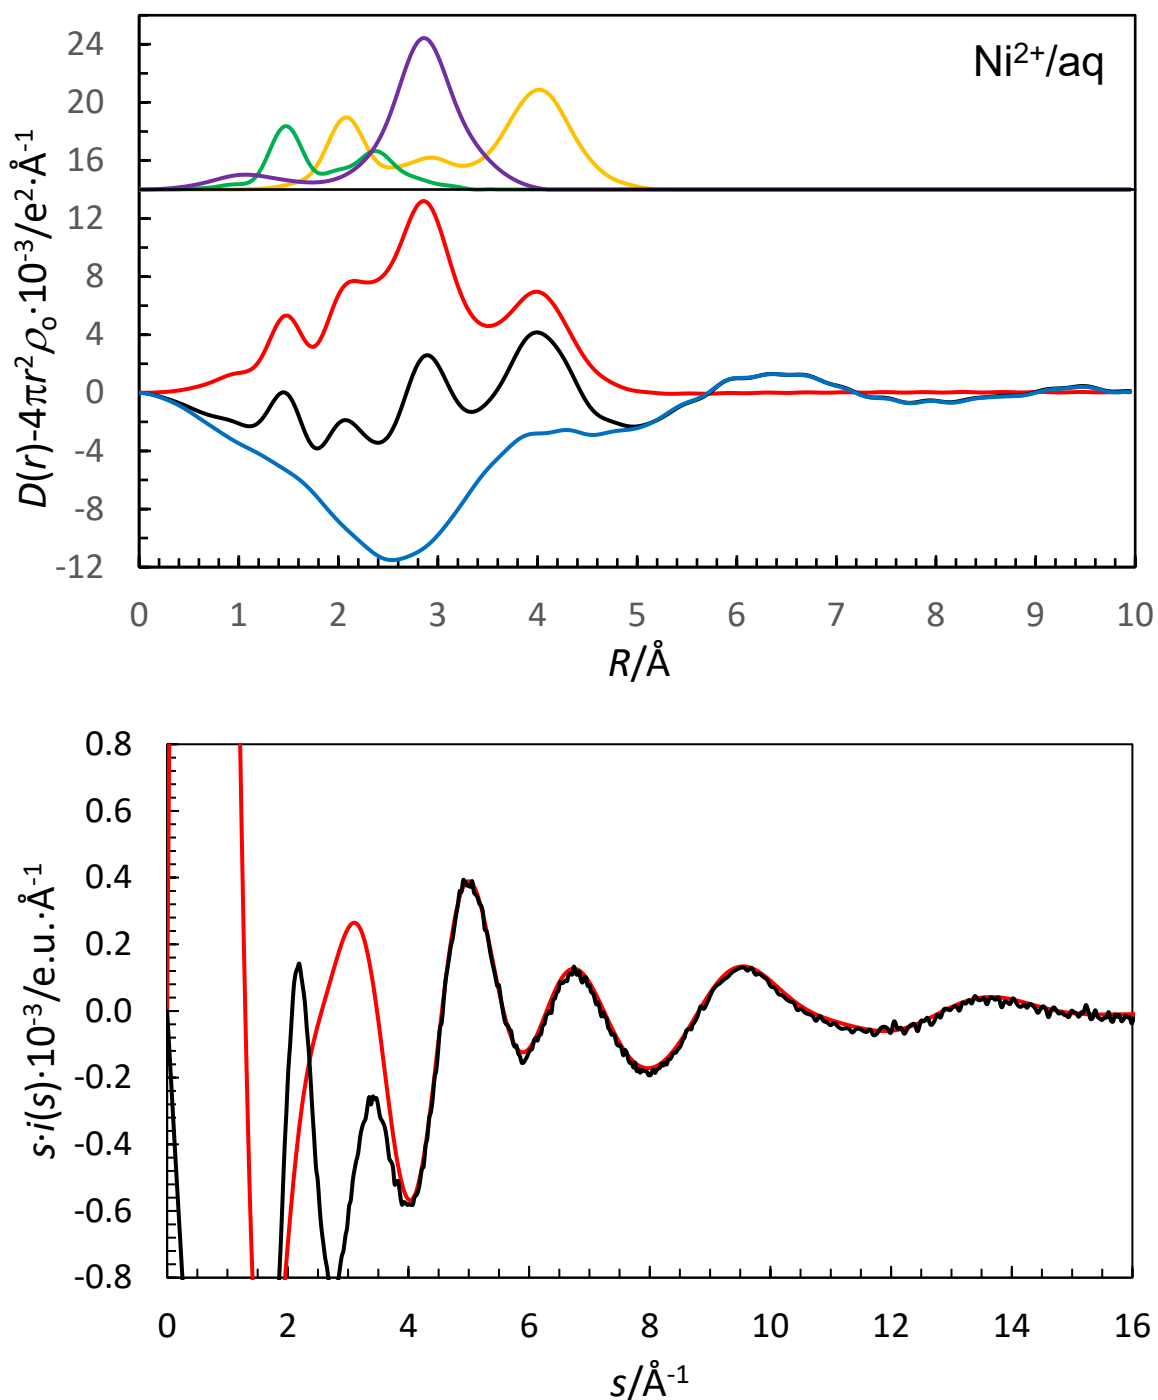

**Figure S6.** (Top) LAXS radial distribution curves for a 1.50 mol·dm<sup>-3</sup> aqueous perchloric acid solution of nickel(II) perchlorate. Upper part: Separate model contributions (offset: 14) of the hydrated nickel(II) ion (yellow line), the hydrated perchlorate ion (green line) and aqueous bulk (purple line). (Middle) Experimental RDF:  $D(r) - 4\pi r^2 \rho_0$  (black line); sum of model contributions (red line); difference (blue line). (Bottom) Reduced LAXS intensity functions  $s \cdot i(s)$  (black line); model  $s \cdot i_{\text{calc}}(s)$  (red line).

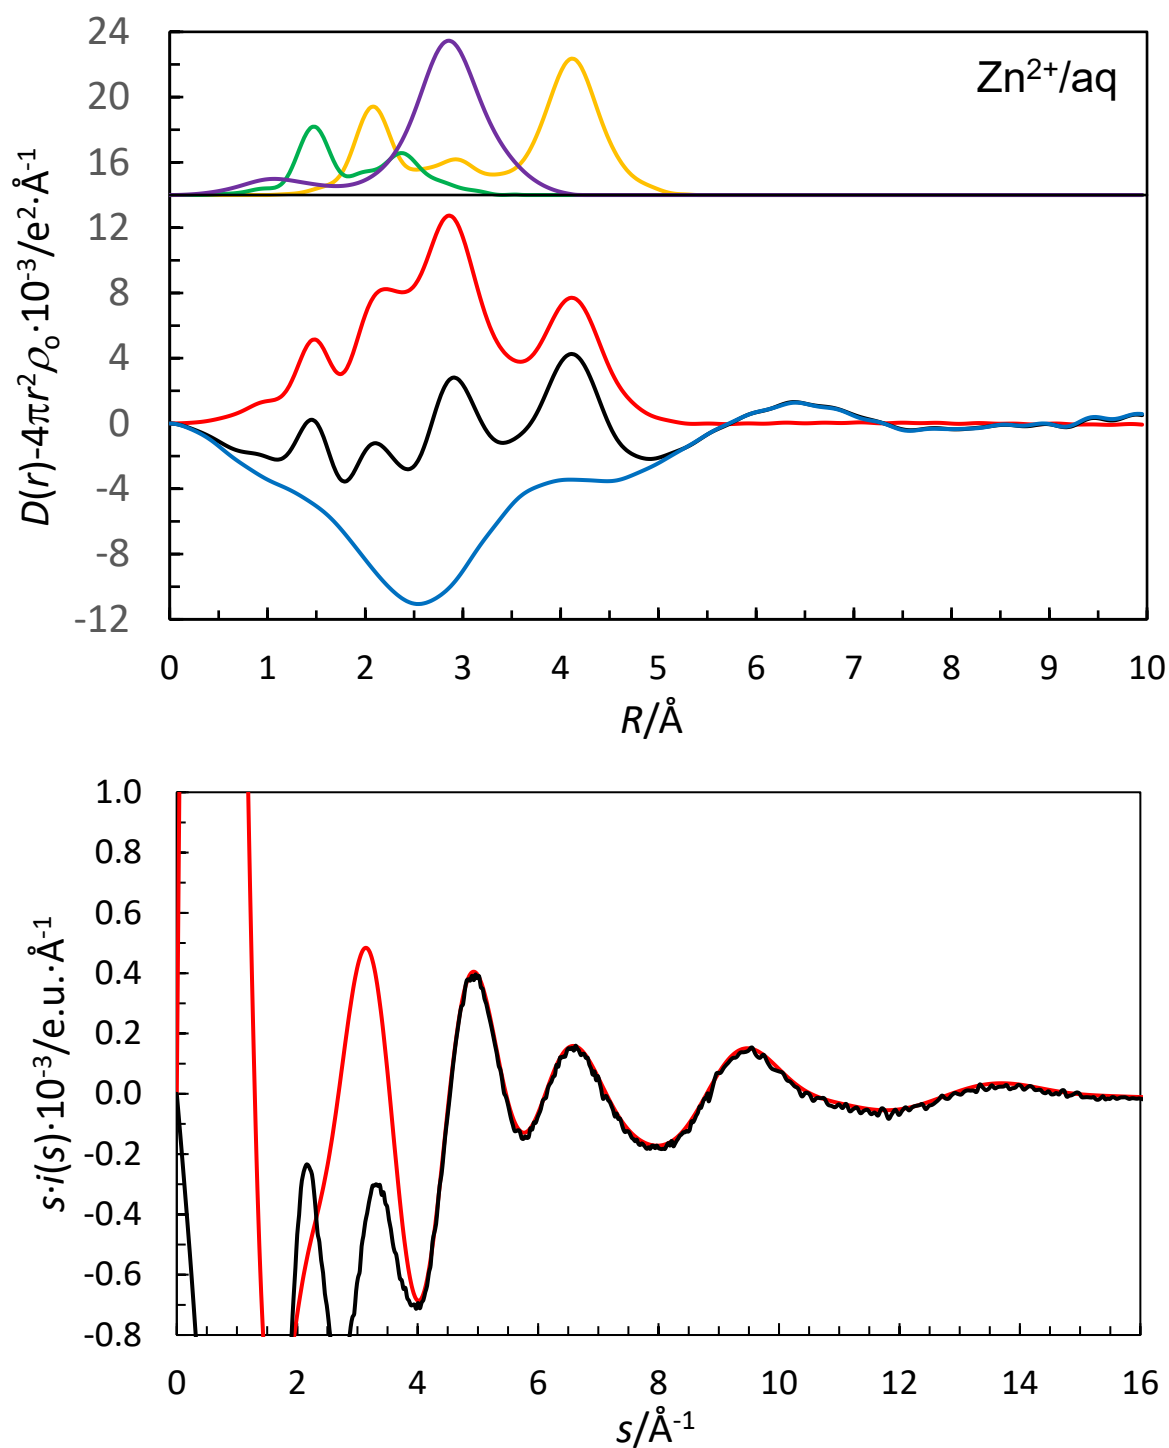

**Figure S7.** (Top) LAXS radial distribution curves for a  $1.50 \text{ mol} \cdot \text{dm}^{-3}$  aqueous perchloric acidic solution of zinc(II) perchlorate. Upper part: Separate model contributions (offset: 14) of the hydrated zinc ion (yellow line), the hydrated perchlorate ion (green line) and aqueous bulk (purple line). (Middle) Experimental RDF:  $D(r) - 4\pi r^2 \rho_0$  (black line); sum of model contributions (red line); difference (blue line). (Bottom) Reduced LAXS intensity functions  $s \cdot i(s)$  (black line); model  $s \cdot i_{\text{calc}}(s)$  (red line).



**Table S1.** Summary reported crystal structures containing a hydrated metal ion until early 2024.

**Table S1a.** Summary of solid state structures containing a hydrated lithium ion. The ICSD/CDS code refers to the code in the Inorganic Crystal Structure Database (ICSD, number) and Cambridge Structure Database (CSD, letters), respectively, and the mean Li-O bond distance,  $d(\text{Li-O})$ ;  $d(\text{Li-O})_b$  denotes bridging ligands and  $d(\text{Li-O})_t$  terminal ligands. Data in purple text are not included in the mean distance as they are uncertain or differ significantly from the mean value.

## Lithium(I)

### Four-coordination

| ICSD/CSD code | $d(\text{Li-O})$ | Reference, compound formula                                                                                                                                                                                                                                                                                            |
|---------------|------------------|------------------------------------------------------------------------------------------------------------------------------------------------------------------------------------------------------------------------------------------------------------------------------------------------------------------------|
| LOKMIK        | 1.872 Å          | Pascual-Alvarez, A.; Cano, J.; Lloret, F.; Ferrando-Soria, J.; Armentano, D.; Pardo, E. <i>Compt. Rendus Chim.</i> <b>2019</b> , <i>22</i> , 466.                                                                                                                                                                      |
| VERDUS        | 1.877 Å          | Benner, K.; Ihringer, J.; Klufers, P.; Marinov, D. <i>Angew. Chem., Int. Ed.</i> <b>2006</b> , <i>45</i> , 5818.<br>[Li(H <sub>2</sub> O) <sub>4</sub> ] <sub>2</sub> [Na(H <sub>2</sub> O) <sub>4</sub> ][SnC <sub>126</sub> H <sub>203</sub> O <sub>105</sub> ]·3C <sub>2</sub> H <sub>5</sub> OH·27H <sub>2</sub> O |
| VERDIG        | 1.888 Å          | Benner, K.; Ihringer, J.; Klufers, P.; Marinov, D. <i>Angew. Chem., Int. Ed.</i> <b>2006</b> , <i>45</i> , 5818.<br>K <sub>2</sub> [Li(H <sub>2</sub> O) <sub>4</sub> ] <sub>4</sub> [MnC <sub>126</sub> H <sub>207</sub> O <sub>105</sub> ]·CH <sub>3</sub> OH·23H <sub>2</sub> O                                     |
| SEJNAW        | 1.907 Å          | Hambley, T. W.; Gahan, L. R.; Searle, G. H. <i>Acta Crystallogr., Sect. C</i> <b>1989</b> , <i>45</i> , 864.<br>[Li(H <sub>2</sub> O) <sub>4</sub> ][Co(C <sub>6</sub> H <sub>14</sub> N <sub>2</sub> S) <sub>2</sub> ]Br <sub>4</sub> ·H <sub>2</sub> O                                                               |
| YEMZUL        | 1.908 Å          | Golden, J. H.; Mutolo, P. F.; Lokovsky, E. B.; DiSalvo, F. J. <i>Inorg. Chem.</i> <b>1994</b> , <i>33</i> , 5374.<br>[Li(H <sub>2</sub> O) <sub>4</sub> ]B(3,5-(CF <sub>3</sub> ) <sub>2</sub> -C <sub>6</sub> H <sub>3</sub> ) <sub>4</sub>                                                                           |
| EVEGUH        | 1.912 Å          | Barea, E.; Navarro, J. A. R.; Salas, J. M.; Masciocchi, N.; Galli, S.; Sironi, A. <i>J. Amer. Chem. Soc.</i> <b>2004</b> , <i>126</i> , 3014. [Li(H <sub>2</sub> O) <sub>4</sub> ]NO <sub>3</sub> ·[Cu <sub>3</sub> C <sub>24</sub> H <sub>18</sub> N <sub>12</sub> O <sub>6</sub> ]·H <sub>2</sub> O                  |
| AQAQAM        | 1.919 Å          | Rajkovic, S.; Zivkovic, M. D.; Warzajtis, B.; Rychlewska, U.; Djuran, M. I. <i>Polyhedron</i> <b>2016</b> , <i>117</i> , 367.<br>[Li(H <sub>2</sub> O) <sub>4</sub> ][Pt <sub>2</sub> C <sub>14</sub> H <sub>32</sub> Cl <sub>2</sub> N <sub>6</sub> ]Cl <sub>4</sub> ·2H <sub>2</sub> O                               |
| BADTUV10      | 1.920 Å          | Ymén, I. <i>Acta Crystallogr., Sect. A</i> <b>1981</b> , <i>37</i> , C223; <i>Acta Crystallogr., Sect. C</i> <b>1983</b> , <i>39</i> , 570.<br>[Li(H <sub>2</sub> O) <sub>4</sub> ]C <sub>4</sub> H <sub>8</sub> NCS <sub>2</sub>                                                                                      |

|          |         |                                                                                                                                                                                                                                                                                                                                                                                                                                                                                 |
|----------|---------|---------------------------------------------------------------------------------------------------------------------------------------------------------------------------------------------------------------------------------------------------------------------------------------------------------------------------------------------------------------------------------------------------------------------------------------------------------------------------------|
| 4348     | 1.924 Å | Ortner, T. S.; Scheifers, J. P.; Flores, J.; Zhang, Y.; Iyer, A. K.; Gesing, T. M.; Fokwa, B. P. T. <i>Eur. J. Inorg. Chem.</i> <b>2019</b> , 3526. Cs <sub>3</sub> [Li(H <sub>2</sub> O) <sub>4</sub> ]Cl <sub>4</sub>                                                                                                                                                                                                                                                         |
| YEMZUL01 | 1.924 Å | Carreras, L.; Rovira, L.; Vaquero, M.; Mon, I.; Martin, E.; Benet-Buchholz, J.; Vidal-Ferran, A. <i>RSC Advances</i> <b>2017</b> , 7, 32833. [Li(H <sub>2</sub> O) <sub>4</sub> ]B(3,5-(CF <sub>3</sub> ) <sub>2</sub> -C <sub>6</sub> H <sub>3</sub> ) <sub>4</sub>                                                                                                                                                                                                            |
| FUQMEL   | 1.926 Å | Specklin, D.; Mameri, S.; Loukopoulos, E.; Kostakis, G. E.; Welter, R. <i>Polyhedron</i> <b>2015</b> , 100, 359. [Li(H <sub>2</sub> O) <sub>4</sub> ][LiC <sub>10</sub> H <sub>14</sub> N <sub>2</sub> O <sub>7</sub> S]·(CH <sub>3</sub> ) <sub>2</sub> CO·H <sub>2</sub> O                                                                                                                                                                                                    |
| 260275   | 1.927 Å | Raabe, I.; Wagner, K.; Santiso-Quinones, G.; Krossing, I. <i>Z. Anorg. Allg. Chem.</i> <b>2009</b> , 635, 513. [Li(H <sub>2</sub> O) <sub>4</sub> ][Al(OC(CF <sub>3</sub> ) <sub>3</sub> ) <sub>4</sub> ]                                                                                                                                                                                                                                                                       |
| FEDHUR   | 1.928 Å | Harrowfield, J. M.; Sharma, R. P.; Skelton, B. W.; White, A. H. <i>Aust. J. Chem.</i> <b>1998</b> , 51, 747. [Li(H <sub>2</sub> O) <sub>4</sub> ](4-NO <sub>2</sub> -C <sub>6</sub> H <sub>4</sub> -O)·(4-NO <sub>2</sub> -C <sub>6</sub> H <sub>4</sub> -OH) [LiC <sub>10</sub> H <sub>14</sub> N <sub>2</sub> O <sub>7</sub> S]·(CH <sub>3</sub> ) <sub>2</sub> CO·H <sub>2</sub> O                                                                                           |
| LAPNAR   | 1.928 Å | Declercq, J. P.; Feneau-Dupont, F.; Ladriere, J. <i>Polyhedron</i> <b>1993</b> , 12, 1031. [Li(H <sub>2</sub> O) <sub>4</sub> ] <sub>3</sub> [Li <sub>5</sub> Fe <sub>2</sub> C <sub>12</sub> H <sub>12</sub> O <sub>30</sub> ]Cl <sub>2</sub>                                                                                                                                                                                                                                  |
| GAYFAP   | 1.928 Å | Kirillova, M. V.; Kirillov, A. M.; Martins, A. N. C.; Graiff, C.; Tiripicchio, A.; Pombeiro, A. J. L. <i>Inorg. Chem.</i> <b>2012</b> , 51, 5224. [Li(H <sub>2</sub> O) <sub>4</sub> ][Cu <sub>4</sub> C <sub>31</sub> H <sub>57</sub> N <sub>4</sub> O <sub>22</sub> S <sub>4</sub> ]·H <sub>2</sub> O                                                                                                                                                                         |
| NOXBIL   | 1.928 Å | Duda, A. M.; Karaczyn, A.; Kozłowski, H.; Fritsky, I. O.; Glowiak, T.; Prisyazhnaya, E. V.; Sliva, T. Yu; Swiatek-Kozłowska, J. <i>J. Chem. Soc., Dalton Trans.</i> <b>1997</b> , 3853. [Li(H <sub>2</sub> O) <sub>4</sub> ][Cu <sub>9</sub> H <sub>13</sub> N <sub>4</sub> O <sub>4</sub> ]·2H <sub>2</sub> O                                                                                                                                                                  |
| XIFHUP   | 1.931 Å | Davidovich, R. L.; Gerasimenko, A. V.; Logvinova, V. B. <i>Zh. Neorg. Khim.</i> <b>2001</b> , 46, 1297. [Li(H <sub>2</sub> O) <sub>4</sub> ][Li(H <sub>2</sub> O) <sub>2</sub> (Bi(C <sub>12</sub> H <sub>22</sub> N <sub>6</sub> O <sub>9</sub> S <sub>2</sub> ) <sub>2</sub> ) <sub>2</sub> ]·5H <sub>2</sub> O                                                                                                                                                               |
| LEPNIF   | 1.932 Å | Kruszynski, R.; Sieranski, T.; Bilinska, A.; Bernat, T.; Czubacka, E. <i>Struct. Chem.</i> <b>2012</b> , 23, 1643. [Li(H <sub>2</sub> O) <sub>4</sub> ]I·2C <sub>6</sub> H <sub>12</sub> N <sub>4</sub>                                                                                                                                                                                                                                                                         |
| YIRRIA   | 1.933 Å | Bakshi, P. K.; Sereda, S. V.; Knop, O. <i>Can. J. Chem.</i> <b>1994</b> , 72, 2144. [Li(H <sub>2</sub> O) <sub>4</sub> ]B(C <sub>6</sub> H <sub>5</sub> ) <sub>4</sub>                                                                                                                                                                                                                                                                                                          |
| OYIPIX   | 1.934 Å | Kim, S. B.; Kim, J. Y.; Jeong, Kang N. C.; Wojciechowski, J.; Dzierzawska, M.; Czubacka, E. <i>J. Chem. Cryst.</i> <b>2015</b> , 45, 484. [Li(H <sub>2</sub> O) <sub>4</sub> ][Li <sub>3</sub> Co <sub>4</sub> C <sub>56</sub> H <sub>32</sub> N <sub>8</sub> O <sub>36</sub> ]·0.5H <sub>2</sub> O                                                                                                                                                                             |
| 79472    | 1.935 Å | Touboul, M.; Betourne, E.; Novogorocki, G. <i>J. Solid State Chem.</i> <b>1995</b> , 115, 549. [Li(H <sub>2</sub> O) <sub>4</sub> ]B(OH) <sub>4</sub> ·2H <sub>2</sub> O                                                                                                                                                                                                                                                                                                        |
| 430533   | 1.935 Å | Liu, Y.; Chen, Z.; Zhang, Z.; Wang, Y.; Dong, X.; Yang, Z. <i>Mater. Res. Bull.</i> <b>2016</b> , 83, 423. [Li(H <sub>2</sub> O) <sub>4</sub> ]B(OH) <sub>4</sub> ·2H <sub>2</sub> O                                                                                                                                                                                                                                                                                            |
| SONDUV   | 1.935 Å | Kotkova, Z.; Pereira, G. A.; Djanashvili, K.; Kotek, J.; Rudovsky, J.; Hermann, P.; Elst, L. V.; Muller, R. N.; Geraldes, C. F. G. C.; Lukes, I.; Peters, J. A. <i>Eur. J. Inorg. Chem.</i> <b>2009</b> , 119. [Li(H <sub>2</sub> O) <sub>4</sub> ][GdLiC <sub>20</sub> H <sub>50</sub> N <sub>4</sub> O <sub>15</sub> P <sub>4</sub> ]·[GdC <sub>20</sub> H <sub>44</sub> N <sub>4</sub> O <sub>12</sub> P <sub>4</sub> ]·(CH <sub>3</sub> ) <sub>2</sub> CO·9H <sub>2</sub> O |
| WIKWUI   | 1.935 Å | Ojala, W. H.; Lu, L. K.; Albers, K. E.; Gleason, W. B.; Richardson, T. I.; Lovrien, R. E.; Sudbeck, E. A. <i>Acta Crystallogr., Sect. B</i> <b>1994</b> , 50, 684. [Li(H <sub>2</sub> O) <sub>4</sub> ] <sub>2</sub> (C <sub>16</sub> H <sub>10</sub> N <sub>2</sub> O <sub>7</sub> S <sub>2</sub> )                                                                                                                                                                            |
| KIJZUZ   | 1.936 Å | Steyl G. <i>Acta Crystallogr., Sect. E</i> <b>2007</b> , 63, m2343. [Li(H <sub>2</sub> O) <sub>4</sub> ](C <sub>7</sub> H <sub>5</sub> O <sub>2</sub> ) <sub>2</sub>                                                                                                                                                                                                                                                                                                            |
| KIJZUZ01 | 1.938 Å | Budanow, A.; Tutughamiarso, M.; Lerner, H.-W.; Bolte, M. CCDC deposition number 793483, <b>2010</b> . [Li(H <sub>2</sub> O) <sub>4</sub> ](C <sub>7</sub> H <sub>5</sub> O <sub>2</sub> ) <sub>2</sub>                                                                                                                                                                                                                                                                          |

|        |         |                                                                                                                                                                                                                                                                                                                                                                                               |
|--------|---------|-----------------------------------------------------------------------------------------------------------------------------------------------------------------------------------------------------------------------------------------------------------------------------------------------------------------------------------------------------------------------------------------------|
| PICXIL | 1.938 Å | Jassal, A. K.; Sran, B. S.; Mandal, K.; Mukhopadhyay, P.; Hundal, G. <i>Cryst. Growth Des.</i> <b>2018</b> , <i>18</i> , 4737. NH <sub>4</sub> [Li(H <sub>2</sub> O) <sub>4</sub> ](C <sub>7</sub> H <sub>5</sub> N <sub>2</sub> O <sub>4</sub> ) <sub>2</sub> ·H <sub>2</sub> O                                                                                                              |
| LEPNEB | 1.940 Å | Kruszynski, R.; Sieranski, T.; Bilinska, A.; Bernat, T.; Czubacka, E. <i>Struct. Chem.</i> <b>2012</b> , <i>23</i> , 1643. [Li(H <sub>2</sub> O) <sub>4</sub> ]Cl·C <sub>6</sub> H <sub>12</sub> N <sub>4</sub>                                                                                                                                                                               |
| BUVPOZ | 1.941 Å | Kruszynski, R.; Sieranski, T.; Swiatkowski, M.; Zielak, M.; Wojciechowski, J.; Dzierzawska, M.; Czubacka, E. <i>J. Chem. Cryst.</i> <b>2015</b> , <i>45</i> , 484. [Li(H <sub>2</sub> O) <sub>4</sub> ]ClO <sub>4</sub> ·2C <sub>6</sub> H <sub>12</sub> N <sub>4</sub>                                                                                                                       |
| TIPWOE | 1.944 Å | Zavalij, P. Y.; Chirayil, T.; Whittingham, M. S.; Pecharsky, V. K.; Jacobson, R. A. <i>Acta Crystallogr., Sect. C</i> <b>1997</b> , <i>53</i> , 170. [Li(H <sub>2</sub> O) <sub>4</sub> ][Li <sub>3</sub> Co <sub>4</sub> C <sub>56</sub> H <sub>32</sub> N <sub>8</sub> O <sub>36</sub> ]·0.5H <sub>2</sub> O                                                                                |
| 170007 | 1.944 Å | Zavalij, P. Y.; Chirayil, T.; Whittingham, M. S.; Pecharskii, V. K.; Jacobson, R. A. <i>Acta Crystallogr., Sect. C</i> <b>1997</b> , <i>53</i> , 170.                                                                                                                                                                                                                                         |
| 260274 | 1.945 Å | Raabe, I.; Wagner, K.; Santiso-Quinones, G.; Krossing, I. <i>Z. Anorg. Allg. Chem.</i> <b>2009</b> , <i>635</i> , 513. [Li(H <sub>2</sub> O) <sub>4</sub> ]OCCF <sub>3</sub>                                                                                                                                                                                                                  |
| COVBEU | 1.945 Å | Perron, J.; Beauchamp, A. L. <i>Inorg. Chem.</i> <b>1984</b> , <i>23</i> , 2853. [Li(H <sub>2</sub> O) <sub>4</sub> ][Ag(NC <sub>4</sub> H <sub>4</sub> O <sub>2</sub> ) <sub>2</sub> ]                                                                                                                                                                                                       |
| KAJZAZ | 1.945 Å | Imada, Y.; Nakano, H.; Furukawa, K.; Kishi, R.; Nakano, M.; Maruyama, H.; Nakamoto, M.; Sekiguchi, A.; Ogawa, M.; Ohta, T.; Yamamoto, Y. <i>J. Chem. Am. Soc.</i> <b>2016</b> , <i>138</i> , 479. [Li(H <sub>2</sub> O) <sub>4</sub> ][Li(C <sub>16</sub> H <sub>9</sub> F <sub>20</sub> O <sub>5</sub> S)](C <sub>16</sub> H <sub>3</sub> F <sub>20</sub> O <sub>2</sub> S)·H <sub>2</sub> O |
| VERDEC | 1.945 Å | Benner, K.; Ihringer, J.; Klufers, P.; Marinov, D. <i>Angew. Chem., Int. Ed.</i> <b>2006</b> , <i>45</i> , 5818. [Li(H <sub>2</sub> O) <sub>4</sub> ] <sub>3</sub> [GeC <sub>126</sub> H <sub>200</sub> O <sub>105</sub> ]·3C <sub>2</sub> H <sub>5</sub> OH·24H <sub>2</sub> O                                                                                                               |
| XAQTOC | 1.945 Å | Vitze, H.; Lerner, H.-W.; Bolte, M. CCDC deposition number 2123519, <b>2021</b> . [Li(H <sub>2</sub> O) <sub>4</sub> ](BSi <sub>4</sub> C <sub>44</sub> H <sub>84</sub> )                                                                                                                                                                                                                     |
| 265010 | 1.946 Å | Peryshkov, D. V.; Bukovsky, E. V.; Lacroix, M. R.; Wu, H.; Zhou, W.; Jones, W. M.; Lozinšek, M.; Folsom, T. C.; Heyliger, D. L.; Udovic, T. J.; Strauss, S. H. <i>Inorg. Chem.</i> <b>2017</b> , <i>56</i> , 12023. K[Li(H <sub>2</sub> O) <sub>4</sub> ]B <sub>12</sub> H <sub>12</sub>                                                                                                      |
| IGAZUL | 1.946 Å | Santos, A. M.; Fernanda, M.; Carvalho, N. N.; Galvao, A. M.; Pombeiro, A. J. L. <i>Z. Naturforsch., Sect. B</i> <b>2002</b> , <i>57</i> , 691. [Li(H <sub>2</sub> O) <sub>4</sub> ](C <sub>10</sub> H <sub>14</sub> NO <sub>4</sub> S)                                                                                                                                                        |
| POVMOF | 1.946 Å | Charushnikova, I. A.; Krot, N. N.; Perminov, V. P. <i>Radiokhimiya</i> <b>2018</b> , <i>60</i> , 521. (C(NH <sub>2</sub> ) <sub>3</sub> ) <sub>2</sub> [Li(H <sub>2</sub> O) <sub>4</sub> ][NpO <sub>2</sub> (OH) <sub>4</sub> ]·2H <sub>2</sub> O                                                                                                                                            |
| NEWLIM | 1.947 Å | Kufelnicki, A.; Tomy, S. V.; Vitske, V.; Jaciubek-Rosinska, J.; Haukka, M.; Fritsky, I. O. <i>Polyhedron</i> <b>2013</b> , <i>56</i> , 144. [Li(H <sub>2</sub> O) <sub>4</sub> ] <sub>2</sub> [Co <sub>3</sub> Li <sub>2</sub> C <sub>18</sub> H <sub>30</sub> N <sub>6</sub> O <sub>24</sub> ]                                                                                               |
| RIBDEM | 1.947 Å | Lazarides, T.; Easun, T. L.; Veyne-Marti, C.; Alsindi, W. Z.; George, M. W.; Deppermann, N.; Hunter, C. A.; Adams, H.; Ward, M. D. <i>J. Am. Chem. Soc.</i> <b>2007</b> , <i>129</i> , 4014. [Li(H <sub>2</sub> O) <sub>4</sub> ][Li(Ru(CN) <sub>4</sub> (N <sub>2</sub> C <sub>10</sub> H <sub>8</sub> ) <sub>20</sub> O <sub>5</sub> S)]                                                    |
| 54839  | 1.949 Å | Locock, A. J.; Burns, P. C.; Duke, M. J. M.; Flynn, T. M. <i>Can. Mineral.</i> <b>2004</b> , <i>42</i> , 973. Li(H <sub>2</sub> O) <sub>4</sub> [(UO <sub>2</sub> )PO <sub>4</sub> ]                                                                                                                                                                                                          |
| 109876 | 1.949 Å | Declercq, J. P.; Feneau-Dupont, J.; Ladriere, J. <i>Polyhedron</i> <b>1993</b> , <i>12</i> , 1031. [Li(H <sub>2</sub> O) <sub>4</sub> ] <sub>3</sub> (Li <sub>5</sub> Fe <sub>2</sub> (C <sub>2</sub> O <sub>4</sub> ) <sub>6</sub> (H <sub>2</sub> O) <sub>6</sub> )Cl <sub>2</sub>                                                                                                          |
| IDOZAC | 1.951 Å | Antipin, M. Yu.; Ilyukhin, A. B.; Kotov, V. Y. <i>Mendeleev Commun.</i> <b>2001</b> , 210.                                                                                                                                                                                                                                                                                                    |

|             |                              |                                                                                                                                                                                                                                                                                                                                                               |
|-------------|------------------------------|---------------------------------------------------------------------------------------------------------------------------------------------------------------------------------------------------------------------------------------------------------------------------------------------------------------------------------------------------------------|
|             |                              | [Li(H <sub>2</sub> O) <sub>4</sub> ] <sub>2</sub> (H <sub>5</sub> C <sub>2</sub> -NC <sub>5</sub> H <sub>4</sub> -C <sub>5</sub> H <sub>4</sub> N-C <sub>2</sub> H <sub>5</sub> ) <sub>3</sub> [Fe(CN) <sub>6</sub> ] <sub>2</sub> ·20H <sub>2</sub> O                                                                                                        |
| POGSIQ      | 1.951 Å                      | Zhilov, V. I.; Kostikova, G. V.; Kuz'mina, L. G.; Demina, L. I.; Demin, S. V.; Tsivadze, A. Y. <i>Izv. Akad. Nauk SSSR, Ser. Khim.</i> <b>2018</b> , 67, 2191. [Li(H <sub>2</sub> O) <sub>4</sub> ][LiC <sub>14</sub> H <sub>21</sub> NO <sub>8</sub> ] <sub>2</sub> Cl <sub>4</sub> ·[LiC <sub>14</sub> H <sub>19</sub> ClNO <sub>7</sub> ]·H <sub>2</sub> O |
| ZAGPOQ      | 1.954 Å                      | Park, K. H.; Lee, K. M.; Go, M. J.; Choi, S. H.; Park, H.-R.; Kim, Y.; Lee, J. <i>Inorg. Chem.</i> <b>2014</b> , 53, 8213. [Li <sub>2</sub> (H <sub>2</sub> O) <sub>7</sub> ][Li(H <sub>2</sub> O) <sub>4</sub> ] <sub>2</sub> [Fe <sub>2</sub> Li <sub>2</sub> C <sub>42</sub> H <sub>28</sub> N <sub>24</sub> O <sub>8</sub> ]·4.5H <sub>2</sub> O          |
| QEHJIY      | 1.955 Å                      | Nicholson, B. K.; Clark, C. J.; Wright, C. E.; Telfer, S. G.; Groutso, T. <i>Organometallics</i> <b>2011</b> , 30, 6612. [Li(H <sub>2</sub> O) <sub>4</sub> ] <sub>2</sub> [Li <sub>4</sub> Sb <sub>12</sub> C <sub>84</sub> H <sub>93</sub> O <sub>31</sub> ]Br·10H <sub>2</sub> O                                                                           |
| ZEGJUT      | 1.958 Å                      | Quarez, E.; Deunf, E.; Cadiou, V.; Gutel, T.; Boucher, F.; Guyomard, D.; Dolhem, F.; Poizot, P. <i>CrystEngComm</i> <b>2017</b> , 19, 6787. [Li(H <sub>2</sub> O) <sub>4</sub> ](C <sub>20</sub> H <sub>14</sub> N <sub>2</sub> O <sub>4</sub> )Br                                                                                                            |
| 1521        | 1.960 Å                      | Caranoni, C.; Pepe, G.; Capella, L. <i>Acta Crystallogr. Sect. B</i> <b>1978</b> , 34, 741. [Li(H <sub>2</sub> O) <sub>4</sub> ][GaO <sub>2</sub> (H <sub>2</sub> O) <sub>2</sub> ]                                                                                                                                                                           |
| YIDJAW      | 1.965 Å                      | Amini, M.M.; Heeg, M. J.; Taylor, R. W.; Zuckerman, J. J.; Seik Weng Ng <i>Main Group Met.Chem.</i> <b>1993</b> , 16, 415. [Li(H <sub>2</sub> O) <sub>4</sub> ] <sub>2</sub> [SnC <sub>14</sub> H <sub>25</sub> N <sub>2</sub> ]ClBr                                                                                                                          |
| WABFIO      | 1.966 Å                      | Goodson, P. A.; Hodgson, D. J.; Glerup, J.; Michelsen, K.; Weihe, H. <i>Inorg. Chim. Acta</i> <b>1992</b> , 197, 141. [Li(H <sub>2</sub> O) <sub>4</sub> ] <sub>2</sub> [Mn <sub>2</sub> C <sub>16</sub> H <sub>40</sub> N <sub>8</sub> O <sub>2</sub> ]Cl <sub>4</sub> ·H <sub>2</sub> O                                                                     |
| PUPCUY      | 1.957 Å                      | Meske, W.; Babel, D. <i>Z. Anorg. Allg. Chem.</i> <b>1998</b> , 624, 1751. ((CH <sub>3</sub> ) <sub>4</sub> N) <sub>6</sub> [Li(H <sub>2</sub> O) <sub>4</sub> ] <sub>2</sub> [Li((H <sub>2</sub> O) <sub>2</sub> (Mo(CN) <sub>6</sub> ) <sub>2</sub> ]·H <sub>2</sub> O                                                                                      |
| 16441       | 1.967 Å                      | Lebioda, L.; Ciechanowicz-Rutkowska, M.; Baker, L. C. W.; Grochowski, J. <i>Acta Crystallogr. Sect. B</i> <b>1980</b> , 36, 2530. [Li(H <sub>2</sub> O) <sub>4</sub> ] <sub>2</sub> H[Co <sub>4</sub> H <sub>12</sub> I <sub>3</sub> O <sub>24</sub> ]·3H <sub>2</sub> O                                                                                      |
| YAPKIJ      | 1.968 Å                      | Fuchs, R.; Habermann, N.; Klufers, P. <i>Angew. Chem., Int. Ed.</i> <b>1993</b> , 32, 852. [Li(H <sub>2</sub> O) <sub>4</sub> ] <sub>3</sub> [Li(H <sub>2</sub> O) <sub>3</sub> ][Cu <sub>4</sub> Li <sub>7</sub> C <sub>84</sub> H <sub>135</sub> O <sub>77</sub> ]·18H <sub>2</sub> O                                                                       |
| JAHZAW      | 1.973 Å                      | de Jongh, L.-A.; Dobrzanska, L.; Strasser, C. E.; Raubenheimer, H. G.; Cronje, S. <i>Z. Naturforsch., Teil B</i> <b>2015</b> , 69, 1073. [Li(H <sub>2</sub> O) <sub>4</sub> ][LiC <sub>6</sub> H <sub>16</sub> O <sub>4</sub> ][Au(C <sub>6</sub> F <sub>5</sub> ) <sub>2</sub> ] <sub>2</sub> ·(CH <sub>3</sub> ) <sub>2</sub> CO·H <sub>2</sub> O           |
| TUJTAU      | 1.975 Å                      | Kunz, K.; Bolte, M.; Wagner, M.; Lerner, H.-W. <i>Z. Anorg. Allg. Chem.</i> <b>2009</b> , 635, 1850. [Li(H <sub>2</sub> O) <sub>4</sub> ](B(C <sub>4</sub> H <sub>5</sub> N <sub>2</sub> S) <sub>4</sub> )                                                                                                                                                    |
| QARGUP      | 2.011 Å                      | Kornowicz, A.; Terlecki, M.; Justyniak, I.; Prochowicz, D.; van Leusen, J.; Kogerler, P.; Lewinski, J. <i>Inorg. Chem.</i> <b>2022</b> , 61, 2499. [Li(H <sub>2</sub> O) <sub>4</sub> ] <sub>4</sub> [Co <sub>3</sub> Li <sub>6</sub> C <sub>72</sub> H <sub>114</sub> O <sub>69</sub> ]·28H <sub>2</sub> O                                                   |
| VERDOM      | 2.063 Å                      | Benner, K.; Ihringer, J.; Klufers, P.; Marinov, D. <i>Angew. Chem., Int. Ed.</i> <b>2006</b> , 45, 5818. [Li(H <sub>2</sub> O) <sub>4</sub> ] <sub>3</sub> [PbC <sub>126</sub> H <sub>203</sub> O <sub>105</sub> ]·5CH <sub>3</sub> OH·34H <sub>2</sub> O                                                                                                     |
| <b>Mean</b> | <b>1.941 Å/53 structures</b> |                                                                                                                                                                                                                                                                                                                                                               |

### *Five-coordination*

| ICSD/CSD code | $d(\text{Li-O})$           | Reference, compound formula                                                                                                                                                                                                                                                                                                                         |
|---------------|----------------------------|-----------------------------------------------------------------------------------------------------------------------------------------------------------------------------------------------------------------------------------------------------------------------------------------------------------------------------------------------------|
| XAQTUI        | 2.044 Å                    | Vitze, H.; Lerner, H.-W.; Bolte, M. CCDC deposition number 2123520, <b>2021</b> .<br>[Li(H <sub>2</sub> O) <sub>5</sub> ][Li(H <sub>2</sub> O)(OC <sub>4</sub> H <sub>8</sub> O)(BSi <sub>4</sub> C <sub>56</sub> H <sub>108</sub> ) <sub>2</sub> ]                                                                                                 |
| LEZSER        | 2.132 Å                    | Ge, Z.-Y.; Zhu, Z.-B.; Deng, Z.-P.; Huo, L.-H.; Gao, S. <i>CrystEngComm</i> <b>2018</b> , <i>20</i> , 2968-2979.<br>[Li(H <sub>2</sub> O) <sub>5</sub> ][Li <sub>3</sub> C <sub>14</sub> H <sub>12</sub> O <sub>16</sub> S <sub>2</sub> ]·3H <sub>2</sub> O                                                                                         |
| YESHIN        | 2.173 Å                    | Bruggemann, R. C. y.; Thewalt, U. <i>Z. Naturforsch., Teil B</i> <b>1994</b> , <i>49</i> , 1531. [Li(H <sub>2</sub> O) <sub>5</sub> ][CoCr <sub>2</sub> C <sub>4</sub> H <sub>16</sub> N <sub>4</sub> O <sub>8</sub> ]                                                                                                                              |
| FEGMAI        | 2.298 Å                    | Srivastava, A. K.; Vijayakanth, T.; Divya, P.; Praveenkumar, B.; Steiner, A.; Boomishankar, R. <i>J. Mater. Chem. C</i> <b>2017</b> , <i>5</i> , 7352. [Li(H <sub>2</sub> O) <sub>5</sub> ][Ni <sub>4</sub> C <sub>128</sub> H <sub>136</sub> N <sub>32</sub> O <sub>16</sub> P <sub>8</sub> ](NO <sub>3</sub> ) <sub>9</sub> ·18.5H <sub>2</sub> O |
| FEGMEM        | 2.337 Å                    | Srivastava, A. K.; Vijayakanth, T.; Divya, P.; Praveenkumar, B.; Steiner, A.; Boomishankar, R. <i>J. Mater. Chem. C</i> <b>2017</b> , <i>5</i> , 7352. [Li(H <sub>2</sub> O) <sub>5</sub> ][Co <sub>4</sub> C <sub>128</sub> H <sub>136</sub> N <sub>32</sub> O <sub>16</sub> P <sub>8</sub> ](NO <sub>3</sub> ) <sub>9</sub> ·27H <sub>2</sub> O   |
| <b>Mean</b>   | <b>2.044 Å/1 structure</b> |                                                                                                                                                                                                                                                                                                                                                     |

### *Six-coordination*

| ICSD/CSD code | $d(\text{Li-O})$           | Reference, compound formula                                                                                                                                                                                                                                                                                                                 |
|---------------|----------------------------|---------------------------------------------------------------------------------------------------------------------------------------------------------------------------------------------------------------------------------------------------------------------------------------------------------------------------------------------|
| LELRID        | 1.937 Å                    | Tang, K.-L.; Li, A.-Q.; Jin, X.-L.; Tang, Y.-Q. <i>Gaodeng Xuexiao Huaxue Xuebao</i> <b>1993</b> , <i>14</i> , 310.<br>((C <sub>2</sub> H <sub>5</sub> ) <sub>4</sub> N) <sub>3</sub> [Li(H <sub>2</sub> O) <sub>6</sub> ][Cd <sub>4</sub> C <sub>60</sub> H <sub>78</sub> S <sub>6</sub> ] <sub>2</sub> ·2C <sub>2</sub> H <sub>5</sub> OH |
| DAXCIQ        | 2.144 Å                    | Hou, Y.; Rodriguez, M. A.; Nyman, M. <i>Cryst. Growth Des.</i> <b>2012</b> , <i>12</i> , 1422.<br>[Li(H <sub>2</sub> O) <sub>6</sub> ][Fe <sub>4</sub> Li <sub>2</sub> C <sub>26</sub> H <sub>40</sub> N <sub>4</sub> O <sub>27</sub> ] <sub>2</sub> ·16H <sub>2</sub> O                                                                    |
| <b>Mean</b>   | <b>2.144 Å/1 structure</b> |                                                                                                                                                                                                                                                                                                                                             |

### *Dimeric hydrate complexes*

#### *Four-coordination, tetrahedral configuration*

| ICSD/CSD code                                                    | $d(\text{Li-O})_b + d(\text{Li-O})_t$ | Reference, compound formula                                                                                                                                                                                                                                                                                                        |
|------------------------------------------------------------------|---------------------------------------|------------------------------------------------------------------------------------------------------------------------------------------------------------------------------------------------------------------------------------------------------------------------------------------------------------------------------------|
| [Li <sub>2</sub> (H <sub>2</sub> O) <sub>6</sub> ] <sup>2+</sup> |                                       |                                                                                                                                                                                                                                                                                                                                    |
| CUSWES01                                                         | 2.004 + 1.917 Å                       | Srinivasan, B. R.; Shetgaonkar, S. Y.; Dhavskar, K. T.; Sundar, J. K.; Natarajan, S. <i>Ind. J. Chem., Sect. A</i> <b>2012</b> , <i>51</i> , 564. [Li <sub>2</sub> (H <sub>2</sub> O) <sub>6</sub> ](4-NO <sub>2</sub> -C <sub>6</sub> H <sub>4</sub> -COO) <sub>2</sub>                                                           |
| KUPFUW                                                           | 2.017 + 1.900 Å                       | Maigrot, N.; Ricard, L.; Charrier, C.; Mathey, F. <i>Angew. Chem., Int. Ed.</i> <b>1992</b> , <i>31</i> , 1031.<br>[Li <sub>2</sub> (H <sub>2</sub> O) <sub>6</sub> ][Li(H <sub>2</sub> O)(OC(CH <sub>3</sub> ) <sub>2</sub> )](C <sub>30</sub> H <sub>20</sub> P <sub>4</sub> S <sub>8</sub> )·(CH <sub>3</sub> ) <sub>2</sub> CO |
| GEFDEA                                                           | 2.022 + 1.880 Å                       | Raston, C. L.; Whitaker, C. R.; White, A. H. <i>Aust. J. Chem.</i> <b>1988</b> , <i>41</i> , 413. [Li <sub>2</sub> (H <sub>2</sub> O) <sub>6</sub> ]Cl <sub>2</sub> ·6(2,5-(CH <sub>3</sub> ) <sub>2</sub> C <sub>5</sub> H <sub>3</sub> N)                                                                                        |
| HOXZIF                                                           | 2.032 + 1.913 Å                       | Drukenmuller, I. E.; Klapotke, T. M.; Morgenstern, Y.; Rusan, M.; Stierstorfer, J. <i>Z. Anorg. Allg. Chem.</i> <b>2014</b> , <i>640</i> , 2139. [Li <sub>2</sub> (H <sub>2</sub> O) <sub>6</sub> ](C <sub>3</sub> H <sub>5</sub> O <sub>6</sub> ) <sub>2</sub>                                                                    |

CELGUV 2.034 + 1.896 Å Ymén, I. *Acta Crystallogr., Sect. C* **1984**, *40*, 241.  $[\text{Li}_2(\text{H}_2\text{O})_6][(\text{C}_2\text{H}_5)_2\text{NCS}_2]_2$   
**Mean** **2.022 + 1.901 Å/5 structures; mean all Li-O bond distances: 1.962 Å**

**$[\text{Li}_2(\text{H}_2\text{O})_7]^{2+}$**   
SODLEE 1.981 + 1.910 Å Dash, S. P.; Panda, A. K.; Pasayat, S.; Dinda, R.; Biswas, A.; Tiekink, E. R. T.; Patil, Y. P.; Nethaji, M.; Kaminsky, W.; Mukhopadhyay, S.; Bhutia, S. K. *Dalton Trans.* **2014**, *43*, 10139.  
 $[\text{Li}_2(\text{H}_2\text{O})_7][\text{VO}_2(\text{C}_{14}\text{H}_{10}\text{N}_2\text{O}_3)] \cdot \text{H}_2\text{O}$   
ZAGPOQ 2.006 + 1.931 Å Park, K. H.; Lee, K. M.; Go, M. J.; Choi, S. H.; Park, H.-R.; Kim, Y.; Lee, J. *Inorg. Chem.* **2014**, *53*, 8213.  $[\text{Li}_2(\text{H}_2\text{O})_7][\text{Li}(\text{H}_2\text{O})_4]_2[\text{Fe}_2\text{Li}_2\text{C}_4\text{H}_28\text{N}_24\text{O}_8] \cdot 4.5\text{H}_2\text{O}$   
TOKSAQ 2.043 + 1.918 Å Heczko, M.; Suminska, E.; Sieklucka, B.; Nowicka, B. *CrystEngComm* **2019**, *21*, 5067.  
 $[\text{Li}_2(\text{H}_2\text{O})_7][\text{Mo}_2\text{Ni}_3\text{C}_{46}\text{H}_{72}\text{N}_{28}] \cdot 17\text{H}_2\text{O}$   
**Mean** **2.010 + 1.918 Å/3 structures; mean all Li-O bond distances: 1.988 Å**

### *Polymeric hydrate complexes*

#### *Four-coordination, tetrahedral configuration*

| ICSD/CSD code                                                |                                       | Reference, compound formula                                                                                                             |
|--------------------------------------------------------------|---------------------------------------|-----------------------------------------------------------------------------------------------------------------------------------------|
| <b><math>[\text{Li}_3(\text{H}_2\text{O})_6]^{3+}</math></b> | $d(\text{Li-O})_b$                    |                                                                                                                                         |
| 173216                                                       | 2.001 Å                               | Schnabel, S.; Roehr, C. <i>Z. Naturforsch., Teil B</i> <b>2007</b> , <i>62</i> , 1235. $[\text{Li}_3(\text{H}_2\text{O})_6]\text{VO}_4$ |
| <b>Mean</b>                                                  | <b>2.001 Å/1 structure</b>            |                                                                                                                                         |
| <b><math>[\text{Li}_3(\text{H}_2\text{O})_8]^{3+}</math></b> | $d(\text{Li-O})_b + d(\text{Li-O})_b$ |                                                                                                                                         |
| 173217                                                       | 1.976 + 1.938 Å                       | Schnabel, S.; Roehr, C. <i>Z. Naturforsch., Teil B</i> <b>2007</b> , <i>62</i> , 1235. $[\text{Li}_3(\text{H}_2\text{O})_8]\text{VO}_4$ |
| <b>Mean</b>                                                  | <b>1.953 Å/1 structure</b>            |                                                                                                                                         |

**Table S1b.** Summary of solid state structures containing a hydrated sodium ion. The ICSD/CDS code refers to the code in the Inorganic Crystal Structure Database (ICSD, number) and Cambridge Structure Database (CSD, letters), respectively, and the mean Na-O bond distance,  $d(\text{Na-O})$ . Data in purple text are not included in the mean distance as they differ significantly from the mean value.

### Sodium(I)

#### *Two-coordination, linear configuration*

| ICSD/CSD code | $d(\text{Na-O})$           | Reference, compound formula                                                                                                                                                                                                                                                                                    |
|---------------|----------------------------|----------------------------------------------------------------------------------------------------------------------------------------------------------------------------------------------------------------------------------------------------------------------------------------------------------------|
| FUDRUR10      | 1.968 Å                    | Haiyan A.; Enbo W.; Yangguang L.; Zhiming Z.; Lin X. <i>Inorg Chem. Commun.</i> <b>2007</b> , <i>10</i> , 299.<br>Na[Na(H <sub>2</sub> O) <sub>2</sub> ][Cu <sub>6</sub> C <sub>16</sub> H <sub>368</sub> O <sub>18</sub> ][H <sub>2</sub> W <sub>12</sub> BO <sub>40</sub> ] <sub>2</sub> ·13H <sub>2</sub> O |
| VOHSAN        | 2.058 Å                    | Wen, X.; Liu, Y.; Li, Z. <i>Acta Crystallogr., Sect. E</i> <b>2008</b> , <i>64</i> , m1634. [Na(H <sub>2</sub> O) <sub>2</sub> ]ClO <sub>4</sub> ·[Cu <sub>2</sub> C <sub>30</sub> H <sub>32</sub> N <sub>4</sub> O <sub>6</sub> ]                                                                             |
| RENPIK        | 2.180 Å                    | Chang, C.-T.; Chen, C.-L.; Liu, Y.-H.; Peng, S.-M.; Chou, P.-T.; Liu, S.-T. <i>Inorg. Chem.</i> <b>2006</b> , <i>45</i> , 7590.<br>[Na(H <sub>2</sub> O) <sub>2</sub> ]B(3,5-C <sub>6</sub> H <sub>3</sub> (CF <sub>3</sub> ) <sub>2</sub> ) <sub>4</sub>                                                      |
| <b>Mean</b>   | <b>2.058 Å/1 structure</b> |                                                                                                                                                                                                                                                                                                                |

#### *Four-coordination, tetrahedral configuration*

| ICSD/CSD code | $d(\text{Na-O})$            | Reference, compound formula                                                                                                                                                                                                                                                                  |
|---------------|-----------------------------|----------------------------------------------------------------------------------------------------------------------------------------------------------------------------------------------------------------------------------------------------------------------------------------------|
| 81459         | 2.177 Å                     | Khan, M. I.; Chen Qin; Salta, J.; O'Connor, C. J. O.; Zubieta, J. <i>Inor. Chem.</i> <b>1996</b> , <i>35</i> , 1880-1901.<br>(NH <sub>4</sub> ) <sub>7</sub> [Na(H <sub>2</sub> O) <sub>3</sub> Mo <sub>16</sub> (OH) <sub>12</sub> O <sub>40</sub> ]·H <sub>2</sub> O                       |
| WABPIZ        | 2.217 Å                     | Hassfjell, S.; Kongshaug, K. O.; Romming, C. <i>Dalton Trans.</i> <b>2003</b> , 1433. [Na(H <sub>2</sub> O) <sub>4</sub> ][BiC <sub>12</sub> H <sub>28</sub> N <sub>4</sub> O <sub>12</sub> P <sub>4</sub> ]                                                                                 |
| GIXBAQ        | 2.224 Å                     | Carina, R. F.; Verzegnassi, L.; Bernardinelli, G.; Williams; A. F. <i>Chem. Commun.</i> <b>1998</b> , 2681.<br>[FeC <sub>22</sub> H <sub>14</sub> N <sub>10</sub> ] <sub>2</sub> [Na(H <sub>2</sub> O) <sub>4</sub> ][NaC <sub>16</sub> H <sub>28</sub> N <sub>4</sub> O <sub>2</sub> ]      |
| BAFGIA        | 2.257 Å                     | Taidakov, I. V.; Zaitsev, B. E.; Krasnosel'sky, S. S.; Polyakova, I. N.; Sergienko, V. S. <i>Zh. Neorg. Khim.</i> <b>2011</b> , <i>56</i> , 387. [Na(H <sub>2</sub> O) <sub>4</sub> ][EuC <sub>52</sub> H <sub>60</sub> N <sub>16</sub> O <sub>8</sub> ]·0.78CH <sub>2</sub> Cl <sub>2</sub> |
| OQANUQ        | 2.289 Å                     | Ene, C. D.; Nastase, S.; Maxim, C.; Madalan, A. M.; Tuna, F.; Andruh, M. <i>Inorg. Chim. Acta</i> <b>2010</b> , <i>363</i> , 4247. [Na(H <sub>2</sub> O) <sub>4</sub> ](As(C <sub>6</sub> H <sub>5</sub> ) <sub>4</sub> )[Fe(CN) <sub>5</sub> N <sub>3</sub> ]                               |
| <b>Mean</b>   | <b>2.247 Å/4 structures</b> |                                                                                                                                                                                                                                                                                              |

#### *Five-coordination, trigonal bipyramidal fashion*

| ICSD/CSD code | $d(\text{Na-O})$ | Reference, compound formula                                                                                                                                                                                                                                                                                                                                                                                   |
|---------------|------------------|---------------------------------------------------------------------------------------------------------------------------------------------------------------------------------------------------------------------------------------------------------------------------------------------------------------------------------------------------------------------------------------------------------------|
| FAZYAH        | 2.338 Å          | Yu Liu; Hao Wang; Heng-Yi Zhang; Li-Hua Wang, <i>Cryst. Growth Des.</i> <b>2005</b> , <i>5</i> , 231.<br>[Na(H <sub>2</sub> O) <sub>5</sub> ](C <sub>24</sub> H <sub>22</sub> N <sub>2</sub> ) <sub>2</sub> (C <sub>24</sub> H <sub>11</sub> O <sub>16</sub> S <sub>8</sub> )·4.5H <sub>2</sub> O.                                                                                                            |
| MITGUS        | 2.344 Å          | Makha, M.; Alias, Y.; Raston, C. L.; Sobolev, A. N. <i>New. J. Chem.</i> <b>2008</b> , <i>32</i> , 83.<br>[Na(H <sub>2</sub> O) <sub>5</sub> ][(C <sub>6</sub> H <sub>5</sub> ) <sub>3</sub> PCH <sub>2</sub> C <sub>6</sub> H <sub>4</sub> CH <sub>2</sub> P(C <sub>6</sub> H <sub>5</sub> ) <sub>3</sub> ] <sub>2</sub> C <sub>28</sub> H <sub>19</sub> O <sub>16</sub> S <sub>4</sub> ·4.5H <sub>2</sub> O |

**Mean 2.341 Å/2 structures**

*Six-coordination, octahedral configuration*

| ICSD/CSD code | <i>d</i> (Na-O) | Reference, compound formula                                                                                                                                                                                                                                                                                                                                                                                                                                                                                                                           |
|---------------|-----------------|-------------------------------------------------------------------------------------------------------------------------------------------------------------------------------------------------------------------------------------------------------------------------------------------------------------------------------------------------------------------------------------------------------------------------------------------------------------------------------------------------------------------------------------------------------|
| LEYPEM        | 2.306 Å         | Xu, Y.; Gao, Y.; Wei, W.; Wang, Z.; Li, S.; Hu, C. <i>Dalton Trans.</i> <b>2013</b> , 42, 5228.<br>K[Na(H <sub>2</sub> O) <sub>6</sub> ][CuC <sub>36</sub> H <sub>48</sub> N <sub>12</sub> O <sub>48</sub> ][W <sub>18</sub> P <sub>2</sub> O <sub>62</sub> ]·36H <sub>2</sub> O                                                                                                                                                                                                                                                                      |
| OJAHAL        | 2.322 Å         | Somsri, S.; Kuwamura, N.; Yoshinari, N.; Konno, T. <i>Inorg. Chem.</i> <b>2020</b> , 59, 5610.<br>[Na(H <sub>2</sub> O) <sub>6</sub> ][Co(H <sub>2</sub> O) <sub>2</sub> (C <sub>12</sub> H <sub>8</sub> N <sub>2</sub> ) <sub>2</sub> ][Co <sub>2</sub> Au <sub>3</sub> C <sub>54</sub> H <sub>72</sub> N <sub>10</sub> O <sub>13</sub> S <sub>6</sub> ] <sub>3</sub>                                                                                                                                                                                |
| 429357        | 2.357 Å         | Yakubovich, O. V.; Steele, I. M.; Yakovleva, E. V.; Dimitrova, O. V. <i>Acta Crystallogr., Sect. C</i> <b>2015</b> , 71, 465. Rb <sub>4</sub> [Na(H <sub>2</sub> O) <sub>6</sub> ][HV <sub>10</sub> O <sub>28</sub> ]·4H <sub>2</sub> O                                                                                                                                                                                                                                                                                                               |
| PEJWAC        | 2.359 Å         | Nefedov, S. E.; Sidorov, A. A.; Berke, H.; Eremenko, I. L. <i>Izv. Akad. Nauk SSSR, Ser. Khim.</i> <b>1998</b> , 1030.<br>[Na(H <sub>2</sub> O) <sub>6</sub> ](H <sub>3</sub> O)[Re <sub>2</sub> C <sub>18</sub> H <sub>37</sub> N <sub>2</sub> O <sub>5</sub> S <sub>4</sub> ] <sub>2</sub> ·H <sub>2</sub> O                                                                                                                                                                                                                                        |
| 281590        | 2.361 Å         | Uk, L.; Joo, H.-C. <i>Acta Crystallogr. Sect. E</i> <b>2004</b> , 60, i22-i24. K <sub>4</sub> [Na(H <sub>2</sub> O) <sub>6</sub> ][HV <sub>10</sub> O <sub>28</sub> ]·4H <sub>2</sub> O                                                                                                                                                                                                                                                                                                                                                               |
| MABNEL        | 2.367 Å         | Arinez-Soriano, J.; Albalad, J.; Perez-Carvajal, J.; Imaz, I.; Busque, F.; Juanhuix, J.; MasPOCH, D. <i>CrystEngComm</i> <b>2016</b> , 18, 4196. [Na(H <sub>2</sub> O) <sub>6</sub> ] <sub>2</sub> [MNC <sub>30</sub> H <sub>35</sub> N <sub>6</sub> O <sub>10</sub> ]·5H <sub>2</sub> O                                                                                                                                                                                                                                                              |
| XUKWOP        | 2.379 Å         | Hegetschweiler, K.; Finn, R. C.; Rarig, Jr., R. S.; Sander, J.; Steinhäuser, S.; Worle, M.; Zubieta, J. <i>Inorg. Chim. Acta</i> <b>2002</b> , 337, 39. [Na(H <sub>2</sub> O) <sub>6</sub> ] <sub>2</sub> [Nb <sub>6</sub> Ni <sub>2</sub> C <sub>12</sub> H <sub>32</sub> N <sub>6</sub> O <sub>25</sub> ]·18H <sub>2</sub> O                                                                                                                                                                                                                        |
| XUXCEZ        | 2.380 Å         | Tan, H.; Chen, W.; Liu, D.; Li, Y.; Wang, E. <i>Dalton Trans.</i> <b>2010</b> , 39, 1245.<br>NH <sub>4</sub> Na <sub>4</sub> [Na(H <sub>2</sub> O) <sub>6</sub> ][Mo <sub>4</sub> VP <sub>4</sub> C <sub>4</sub> H <sub>6</sub> O <sub>26</sub> ]·7H <sub>2</sub> O                                                                                                                                                                                                                                                                                   |
| PULDUW        | 2.389 Å         | Zhong, Y.; Fu, H.; Meng, J.; Wang, E. <i>J. Coord. Chem.</i> <b>2010</b> , 63, 26.<br>Na[Na(H <sub>2</sub> O) <sub>6</sub> ][Cu(C <sub>2</sub> H <sub>4</sub> NO <sub>2</sub> ) <sub>2</sub> ][Na <sub>3</sub> H <sub>31</sub> W <sub>12</sub> ]·8.5H <sub>2</sub> O                                                                                                                                                                                                                                                                                  |
| 161174        | 2.405 Å         | Abrahams, B. F.; Haywood, M. G.; Robson, R. <i>Crystal Growth Design</i> <b>2008</b> , 8, 1288-1293.<br>[Na(H <sub>2</sub> O) <sub>6</sub> ][(Mn(H <sub>2</sub> O) <sub>2</sub> ) <sub>3</sub> ][Cu(SO <sub>3</sub> ) <sub>4</sub> ]                                                                                                                                                                                                                                                                                                                  |
| UNILUZ        | 2.406 Å         | Niu, J.; Chen, G.; Zhao, J.; Yu, C.; Ma, P.; Wang, J. <i>Cryst. Growth Des.</i> <b>2010</b> , 10, 4689.<br>[Na(H <sub>2</sub> O) <sub>6</sub> ][Cu(C <sub>10</sub> H <sub>8</sub> N <sub>2</sub> ) <sub>3</sub> ] <sub>2</sub> [Cu(C <sub>3</sub> H <sub>10</sub> N <sub>2</sub> ) <sub>2</sub> H <sub>2</sub> O] <sub>6</sub> [Cu(C <sub>3</sub> H <sub>10</sub> N <sub>2</sub> ) <sub>2</sub> ] <sub>12</sub> [Mo <sub>8</sub> O <sub>42</sub> PV <sub>6</sub> ] <sub>5</sub> [HMo <sub>8</sub> O <sub>42</sub> PV <sub>6</sub> ]·2H <sub>2</sub> O |
| 253649        | 2.413 Å         | Kampf, A. R.; Hughes, J. M.; Nash, B. P.; Marty, J. <i>Can. Miner.</i> <b>2016</b> , 54, 145.<br>[Na(H <sub>2</sub> O) <sub>6</sub> Ca <sub>12</sub> (H <sub>2</sub> O) <sub>58</sub> ](H <sub>2</sub> O) <sub>14</sub> ][As <sub>7</sub> V <sub>12</sub> O <sub>51</sub> ] <sub>2</sub>                                                                                                                                                                                                                                                              |
| PODTAG        | 2.417 Å         | Somov, N. V.; Chausov, F. F.; Lomova, N. V.; Zakirova, R. M.; Fedotova, I. V.; Petrov, V. G.; Shumilova, M. A.; Zhironov, D. K. <i>Koord. Khim.</i> <b>2019</b> , 45, 47. [Na(H <sub>2</sub> O) <sub>6</sub> ] <sub>2</sub> (PrNa <sub>6</sub> C <sub>6</sub> H <sub>33</sub> N <sub>2</sub> O <sub>28</sub> P <sub>6</sub> )·6H <sub>2</sub> O                                                                                                                                                                                                       |
| LUQBII        | 2.421 Å         | Benetollo, F.; Bombieri, G.; Calabi, L.; Aime, S.; Botta, M. <i>Inorg. Chem.</i> <b>2003</b> , 42, 148.<br>[Na(H <sub>2</sub> O) <sub>6</sub> ](CeNaC <sub>17</sub> H <sub>29</sub> N <sub>4</sub> O <sub>13</sub> ).                                                                                                                                                                                                                                                                                                                                 |



|        |         |                                                                                                                                                                                                                                                                                                                                                                                                                   |
|--------|---------|-------------------------------------------------------------------------------------------------------------------------------------------------------------------------------------------------------------------------------------------------------------------------------------------------------------------------------------------------------------------------------------------------------------------|
| DIWMOO | 2.421 Å | Somov, N. V.; Chausov, F. F.; Zakirova, R. M.; Shumilova, M. A.; Petrov, V. G.; Zhiron, D. K. <i>Crystallogr. Rep.</i> <b>2018</b> , <i>63</i> , 901. [Na(H <sub>2</sub> O) <sub>6</sub> ] <sub>2</sub> [TbNa <sub>6</sub> C <sub>6</sub> H <sub>32</sub> N <sub>2</sub> O <sub>28</sub> P <sub>6</sub> ]·6H <sub>2</sub> O                                                                                       |
| NESREK | 2.421 Å | Han, S.-D.; Song, W.-C.; Zhao, J.-P.; Yang, Q.; Liu, S.-J.; Li, Y.; Bu, X.-H. <i>Chem. Commun.</i> <b>2013</b> , <i>49</i> , 871. [Na(H <sub>2</sub> O) <sub>6</sub> ][Co(H <sub>2</sub> O) <sub>6</sub> ][Co <sub>9</sub> C <sub>30</sub> H <sub>43</sub> N <sub>12</sub> O <sub>37</sub> ]((CH <sub>3</sub> ) <sub>3</sub> CCOO) <sub>2</sub> ·2H <sub>2</sub> O                                                |
| QOWTII | 2.422 Å | Somov, N. V.; Chausov, F. F.; Lomova, N. V.; Vorobyov, V. L.; Zakirova, R. M.; Petrov, V. G.; Shumilova, M. A.; Zhiron, D. K. <i>Zh. Strukt. Khim.</i> <b>2019</b> , <i>60</i> , 1385. [Na(H <sub>2</sub> O) <sub>6</sub> ] <sub>2</sub> [GdNa <sub>6</sub> C <sub>6</sub> H <sub>33</sub> N <sub>2</sub> O <sub>28</sub> P <sub>6</sub> ]·4H <sub>2</sub> O                                                      |
| YEBMIE | 2.423 Å | Somov, N. V.; Chausov, F. F.; Zakirova, R. M.; Petrov, V. G.; Shumilova, M. A.; Aleksandrov, V. A. <i>Koord. Khim.</i> <b>2017</b> , <i>43</i> , 373. [Na(H <sub>2</sub> O) <sub>6</sub> ] <sub>2</sub> [LaNa <sub>6</sub> C <sub>6</sub> H <sub>33</sub> N <sub>2</sub> O <sub>28</sub> P <sub>6</sub> ]·3H <sub>2</sub> O                                                                                       |
| XAFFEQ | 2.424 Å | Suzuki, J.; Yamauchi, T.; Akashi, H. <i>Bull. Res. Inst. Nat. Sci. Okayama Univ. Sci.</i> <b>2001</b> , <i>13</i> . [Ni(H <sub>2</sub> O) <sub>6</sub> ][Na <sub>2</sub> C <sub>24</sub> H <sub>28</sub> O <sub>24</sub> S <sub>8</sub> ]·4H <sub>2</sub> O.                                                                                                                                                      |
| PODSUZ | 2.426 Å | Somov, N. V.; Chausov, F. F.; Lomova, N. V.; Zakirova, R. M.; Fedotova, I. V.; Petrov, V. G.; Shumilova, M. A.; Zhiron, D. K. <i>Koord. Khim.</i> <b>2019</b> , <i>45</i> , 47. [Na(H <sub>2</sub> O) <sub>6</sub> ] <sub>2</sub> (NdNa <sub>6</sub> C <sub>6</sub> H <sub>33</sub> N <sub>2</sub> O <sub>28</sub> P <sub>6</sub> )·6H <sub>2</sub> O                                                             |
| AGAMAZ | 2.430 Å | Salcedo, I. R.; Colodrero, R. M. P.; Bazaga-Garcia, M.; Vasileiou, A.; Papadaki, M.; Olivera-Pastor, P.; Infantes-Molina, A.; Losilla, E. R.; Mezei, G.; Cabeza, A.; Demadis, K. D. <i>CrystEngComm</i> <b>2018</b> , <i>20</i> , 7648. [Na(H <sub>2</sub> O) <sub>6</sub> ][Na <sub>3</sub> C <sub>20</sub> H <sub>68</sub> N <sub>4</sub> O <sub>32</sub> P <sub>8</sub> ]·8H <sub>2</sub> O                    |
| ALOWUU | 2.431 Å | Gunari, P.; Krishnasamy, S.; Bai, S.-Q.; Hor, T. S. A. <i>Dalton Trans.</i> <b>2010</b> , <i>39</i> , 9462. [Na(H <sub>2</sub> O) <sub>6</sub> ][Pd <sub>6</sub> Na <sub>11</sub> C <sub>36</sub> H <sub>72</sub> O <sub>66</sub> ]·H <sub>2</sub> O                                                                                                                                                              |
| QUQKES | 2.434 Å | Bailey, P. J.; Lanfranchi, M.; Marchio, L.; Parsons, S. <i>Inorg. Chem.</i> <b>2001</b> , <i>40</i> , 5030. [Na(H <sub>2</sub> O) <sub>6</sub> ][NaC <sub>24</sub> H <sub>38</sub> B <sub>2</sub> N <sub>18</sub> S <sub>6</sub> ]                                                                                                                                                                                |
| UKARIK | 2.437 Å | Kaur, S.; Pramanik, S.; Day, V. W.; Bowman-James, K. <i>Dalton Trans.</i> <b>2021</b> , <i>50</i> , 480. [Na(H <sub>2</sub> O) <sub>6</sub> ] <sub>3</sub> [Na <sub>33</sub> C <sub>18</sub> H <sub>228</sub> O <sub>168</sub> P <sub>18</sub> ]·5.6H <sub>2</sub> O                                                                                                                                              |
| HULFUS | 2.448 Å | K(CH <sub>3</sub> NH <sub>3</sub> ) <sub>6</sub> [Na(H <sub>2</sub> O) <sub>6</sub> ][NaMn <sub>8</sub> W <sub>18</sub> Si <sub>2</sub> C <sub>12</sub> H <sub>23</sub> O <sub>86</sub> ]·28H <sub>2</sub> O                                                                                                                                                                                                      |
| LUQCIJ | 2.449 Å | Benetollo, F.; Bombieri, G.; Calabi, L.; Aime, S.; Botta, M. <i>Inorg. Chem.</i> <b>2003</b> , <i>42</i> , 148. [Na(H <sub>2</sub> O) <sub>6</sub> ](CeNaC <sub>17</sub> H <sub>29</sub> N <sub>4</sub> O <sub>13</sub> )·[Sc <sub>2</sub> Na <sub>4</sub> C <sub>32</sub> H <sub>62</sub> N <sub>8</sub> O <sub>23</sub> ][ScC <sub>16</sub> H <sub>24</sub> N <sub>4</sub> O <sub>8</sub> ]·11H <sub>2</sub> O. |
| OJAGUE | 2.465 Å | Somsri, S.; Kuwamura, N.; Yoshinari, N.; Konno, T. <i>Inorg. Chem.</i> <b>2020</b> , <i>59</i> , 5610. [Na(H <sub>2</sub> O) <sub>6</sub> ][Co(H <sub>2</sub> O) <sub>2</sub> (C <sub>12</sub> H <sub>8</sub> N <sub>2</sub> ) <sub>2</sub> ](Co <sub>3</sub> Au <sub>3</sub> C <sub>54</sub> H <sub>72</sub> N <sub>10</sub> O <sub>13</sub> S <sub>6</sub> ) <sub>3</sub>                                       |
| 82492  | 2.471 Å | Cooper, M. A.; Hawthorne, F. C. <i>Can. Mineral.</i> <b>1996</b> , <i>34</i> , 91. [AlMn <sub>2</sub> (OH) <sub>6</sub> ] <sub>3</sub> [Na(H <sub>2</sub> O) <sub>6</sub> ](SO <sub>4</sub> ) <sub>2</sub> ·6H <sub>2</sub> O                                                                                                                                                                                     |
| MIVBAV | 2.473 Å | Philippopoulos, A. I.; Terzis, A.; Raptopoulou, C. P.; Catalano, V. J.; Falaras, P. <i>Eur. J. Inorg. Chem.</i> <b>2007</b> , 5633. [Na(H <sub>2</sub> O) <sub>6</sub> ][RuC <sub>24</sub> H <sub>15</sub> N <sub>8</sub> O <sub>4</sub> ]·0.5CH <sub>3</sub> CN·1.5H <sub>2</sub> O                                                                                                                              |
| FASCEI | 2.477 Å | Gerasimchuk, N. N.; Dalley, N. K. <i>J. Coord. Chem.</i> <b>2004</b> , <i>57</i> , 1431. [Na(H <sub>2</sub> O) <sub>6</sub> ][C <sub>18</sub> H <sub>12</sub> N <sub>18</sub> NaNi <sub>2</sub> O <sub>12</sub> ]                                                                                                                                                                                                 |
| OJAGUY | 2.505 Å | Somsri, S.; Kuwamura, N.; Yoshinari, N.; Konno, T. <i>Inorg. Chem.</i> <b>2020</b> , <i>59</i> , 5610. [Na(H <sub>2</sub> O) <sub>6</sub> ][Mn(H <sub>2</sub> O) <sub>2</sub> (C <sub>12</sub> H <sub>8</sub> N <sub>2</sub> ) <sub>2</sub> ][Au <sub>3</sub> Co <sub>2</sub> MnC <sub>54</sub> H <sub>72</sub> N <sub>10</sub> O <sub>13</sub> S <sub>6</sub> ] <sub>3</sub>                                     |

OJAHEP 2.523 Å Somsri, S.; Kuwamura, N.; Yoshinari, N.; Konno, T. *Inorg. Chem.* **2020**, *59*, 5610.  
 $[\text{Na}(\text{H}_2\text{O})_6][\text{Zn}(\text{H}_2\text{O})_2(\text{C}_{12}\text{H}_8\text{N}_2)_2][\text{Au}_3\text{Co}_2\text{ZnC}_{54}\text{H}_{72}\text{N}_{10}\text{O}_{13}\text{S}_6]_3$

**Mean 2.418 Å/28 structures**

*Eight-coordination*

| ICSD/CSD code | $d(\text{Na-O})$ | Reference, compound formula                                                                                                                                                                                                                                                                          |
|---------------|------------------|------------------------------------------------------------------------------------------------------------------------------------------------------------------------------------------------------------------------------------------------------------------------------------------------------|
| VOGJOQ        | 2.477 Å          | Hardie, M. J.; Raston, C. L.; Salinas, A. <i>Chem. Commun.</i> <b>2001</b> , 1850.<br>$[\text{Y}(\text{H}_2\text{O})_8][\text{Na}(\text{H}_2\text{O})_8](\text{C}_{27}\text{H}_{30}\text{O}_6)_8[\text{CoC}_4\text{H}_{22}\text{B}_{18}]_4 \cdot 8\text{CH}_3\text{CN} \cdot 8\text{H}_2\text{O}$ .  |
| VOGNOU        | 2.465 Å          | Hardie, M. J.; Raston, C. L.; Salinas, A. <i>Chem. Commun.</i> <b>2001</b> , 1850.<br>$[\text{La}(\text{H}_2\text{O})_8][\text{Na}(\text{H}_2\text{O})_8](\text{C}_{27}\text{H}_{30}\text{O}_6)_8[\text{CoC}_4\text{H}_{22}\text{B}_{18}]_4 \cdot 8\text{CH}_3\text{CN} \cdot 8\text{H}_2\text{O}$ . |

**Mean Na-O bond distance in eight-coordinated oxygen donor ligands: 2.471 Å/2 structures**

*Dimeric sodium hydrates*

| ICSD/CSD code                                | $d(\text{Na-O})_b/d(\text{Na}\cdots\text{Na})$ | Reference, compound formula                                                                                                                                                                                                                                                 |
|----------------------------------------------|------------------------------------------------|-----------------------------------------------------------------------------------------------------------------------------------------------------------------------------------------------------------------------------------------------------------------------------|
| $[\text{Na}_2(\text{H}_2\text{O})_6]_n^{2+}$ |                                                |                                                                                                                                                                                                                                                                             |
| HAYQUU                                       | 2.403 Å<br>3.130 Å                             | Wang, D.-D.; Zhu, H.-J.; Song, G.-L.; Wang, J.-T. <i>Acta Crystallogr., Sect. E</i> <b>2005</b> , <i>61</i> , m2610.<br>$[\text{Na}_2(\text{H}_2\text{O})_6]_n(2,5\text{-(COO)}_2\text{-}1,4\text{-(COC}_6\text{H}_5)_2\text{-C}_6\text{H}_2)_n \cdot 4n\text{H}_2\text{O}$ |

| ICSD/CSD code                                | $d(\text{Na-O}_b)+d(\text{Na-O}_t)/d(\text{Na}\cdots\text{Na})$ | Reference, compound formula                                                                                                                                                                                                             |
|----------------------------------------------|-----------------------------------------------------------------|-----------------------------------------------------------------------------------------------------------------------------------------------------------------------------------------------------------------------------------------|
| $[\text{Na}_2(\text{H}_2\text{O})_7]_n^{2+}$ |                                                                 |                                                                                                                                                                                                                                         |
| PEHSEC                                       | 2.422 + 2.379 Å<br>3.264 + 4.227 Å                              | Iqbal, M.; Ali, S.; Muhammad, N.; Parvez, M.; Langer, P. <i>J. Organometal. Chem.</i> <b>2013</b> , <i>723</i> , 214.<br>$[\text{Na}_2(\text{H}_2\text{O})_7]_n(2\text{-(CHC(COOH)(C}_2\text{H}_5))\text{-}1\text{-F-C}_6\text{H}_4)_n$ |

|        | $d(\text{Na-O}_b)+d(\text{Na-O}_t)/d(\text{Na}\cdots\text{Na})/\text{Å}$ |                                                                                                                                                                                                                                                                                                                                                          |
|--------|--------------------------------------------------------------------------|----------------------------------------------------------------------------------------------------------------------------------------------------------------------------------------------------------------------------------------------------------------------------------------------------------------------------------------------------------|
| KOJBIV | 2.378 + 2.539 Å<br>3.440 Å                                               | Wang, Y.; Song, Y.; Pan, Z.-R.; Shen, Y.-Z.; Hu, Z.; Guo, Z.-J.; Zheng, H.-G. <i>Dalton Trans.</i> <b>2008</b> , 5588. $[\text{Na}_2(\text{H}_2\text{O})_8]_n[\text{Cu}_2\text{Sm}_2\text{C}_{20}\text{H}_{24}\text{N}_8\text{O}_{26}] \cdot 3\text{H}_2\text{O}$                                                                                        |
| OVABOF | 2.382 + 2.476 Å<br>3.406 Å                                               | Abrahams, B. F.; Commons, C. J.; Hudson, T. A.; Sanchez Arlt, R.; White, K. F.; Chang, M.; Jackowski, J. J.; Lee, M.; Lee, S. X.; Liu, H.D.; Mei, B. M.; Meng, J. E.; Poon, L.; Xu, X.; Yu, Z. <i>Acta Crystallogr., Sect. C</i> <b>2021</b> , <i>77</i> , 340. $[\text{Na}_2(\text{H}_2\text{O})_8]_n(p\text{-C}_6\text{H}_4(\text{OH})(\text{COO}))_n$ |
| KOJBOB | 2.384 + 2.538 Å<br>3.461 Å                                               | Wang, Y.; Song, Y.; Pan, Z.-R.; Shen, Y.-Z.; Hu, Z.; Guo, Z.-J.; Zheng, H.-G. <i>Dalton Trans.</i> <b>2008</b> , 5588. $[\text{Na}_2(\text{H}_2\text{O})_8]_n[\text{Cu}_2\text{Pr}_8\text{C}_{20}\text{H}_{24}\text{N}_8\text{O}_{26}] \cdot 3\text{H}_2\text{O}$                                                                                        |
| ONETEJ | 2.390 + 2.454 Å                                                          | Starynowicz, P. <i>New. J. Chem.</i> <b>2021</b> , <i>45</i> , 5879. $[\text{Na}_2(\text{H}_2\text{O})_{10}][\text{EuNa}_5\text{C}_{12}\text{H}_4\text{N}_4\text{O}_{21}\text{P}_4] \cdot 12\text{H}_2\text{O}$                                                                                                                                          |

|                                                                   |                                                       |                                                                                                                                                                                                                                                                                                                                                                                                                                       |
|-------------------------------------------------------------------|-------------------------------------------------------|---------------------------------------------------------------------------------------------------------------------------------------------------------------------------------------------------------------------------------------------------------------------------------------------------------------------------------------------------------------------------------------------------------------------------------------|
|                                                                   | 3.533 Å                                               |                                                                                                                                                                                                                                                                                                                                                                                                                                       |
| KOJBER                                                            | 2.397 + 2.519 Å<br>3.490 Å                            | Wang, Y.; Song, Y.; Pan, Z.-R.; Shen, Y.-Z.; Hu, Z.; Guo, Z.-J.; Zheng, H.-G. <i>Dalton Trans.</i> <b>2008</b> , 5588.                                                                                                                                                                                                                                                                                                                |
| KOJBAN                                                            | 2.416 + 2.539 Å<br>3.464 Å                            | Wang, Y.; Song, Y.; Pan, Z.-R.; Shen, Y.-Z.; Hu, Z.; Guo, Z.-J.; Zheng, H.-G. <i>Dalton Trans.</i> <b>2008</b> , 5588. [Na <sub>2</sub> (H <sub>2</sub> O) <sub>8</sub> ] <sub>n</sub> [Cu <sub>2</sub> Gd <sub>2</sub> C <sub>20</sub> H <sub>24</sub> N <sub>8</sub> O <sub>26</sub> ]·3H <sub>2</sub> O                                                                                                                            |
| EJAMEH                                                            | 2.419 + 2.526 Å                                       | Ma, C.; Chen, C.; Chen, F.; Zhang, X.; Zhu, H.; Liu, Q.; Liao, D.; Li L. <i>Bull Chem. Soc. Jpn.</i> <b>2003</b> , 76,                                                                                                                                                                                                                                                                                                                |
|                                                                   | 3.640 Å                                               | 301. [Na <sub>2</sub> (H <sub>2</sub> O) <sub>8</sub> ] <sub>n</sub> [Na <sub>2</sub> (H <sub>2</sub> O) <sub>9</sub> ] <sub>n</sub> [Mn <sub>2</sub> Na <sub>2</sub> C <sub>28</sub> H <sub>28</sub> N <sub>4</sub> O <sub>24</sub> ] <sub>n</sub> ·0.5nCH <sub>3</sub> OH                                                                                                                                                           |
| MUYXEM                                                            | 2.424 + 2.413 Å<br>3.477 Å                            | Li, H.-L.; Lian, C.; Yin, D.-P.; Yang, G.-Y. <i>Inorg. Chem.</i> <b>2020</b> , 59, 12842.                                                                                                                                                                                                                                                                                                                                             |
| OSURUR                                                            | 2.424 + 2.421 Å<br>3.452 Å                            | (CH <sub>3</sub> ) <sub>2</sub> H <sub>2</sub> N) <sub>14</sub> [Na <sub>2</sub> (H <sub>2</sub> O) <sub>8</sub> ][Zr <sub>2</sub> Sb <sub>2</sub> W <sub>18</sub> C <sub>20</sub> H <sub>2</sub> O <sub>71</sub> ]·24H <sub>2</sub> O<br>Gainsford, G. J.; Kemmitt, T. Higham, C. <i>Acta Crystallogr., Sect. E</i> <b>2008</b> , 64, i24.                                                                                           |
| TOJYEY                                                            | 2.425 + 2.410 Å<br>3.519 Å                            | [Na <sub>2</sub> (H <sub>2</sub> O) <sub>8</sub> ] <sub>n</sub> [H <sub>4</sub> B <sub>4</sub> O <sub>9</sub> ] <sub>n</sub><br>Weil, M.; Bonneau, B. <i>Acta Crystallogr., Sect. E</i> <b>2014</b> , 70, 54. [Na <sub>2</sub> (H <sub>2</sub> O) <sub>8</sub> ] <sub>n</sub> [SeO <sub>4</sub> ] <sub>n</sub> ·2nH <sub>2</sub> O                                                                                                    |
| <b>Mean</b>                                                       | <b>2.402 + 2.491 Å/9 structures</b><br><b>3.489 Å</b> |                                                                                                                                                                                                                                                                                                                                                                                                                                       |
| <b>[Na<sub>2</sub>(H<sub>2</sub>O)<sub>9</sub>]<sup>2+</sup></b>  |                                                       |                                                                                                                                                                                                                                                                                                                                                                                                                                       |
| CAWDOV                                                            | 2.396 + 2.420 Å<br>3.154 Å                            | Guo, G.; Xu, Y.; Cao, J.; Hu, C. <i>Chem. Eur. J.</i> <b>2012</b> , 18, 3493.                                                                                                                                                                                                                                                                                                                                                         |
| INUJIN                                                            | 2.448 + 2.415 Å<br>3.275 Å                            | [Na <sub>2</sub> (H <sub>2</sub> O) <sub>9</sub> ][Cu(NH <sub>2</sub> CH(CH <sub>3</sub> )CHNH <sub>2</sub> ) <sub>2</sub> ][H <sub>2</sub> Nb <sub>6</sub> V <sub>4</sub> O <sub>30</sub> ]·15H <sub>2</sub> O<br>Kurbah, S. D. <i>J. Coord. Chem.</i> <b>2021</b> , 74, 905. [Na <sub>2</sub> (H <sub>2</sub> O) <sub>9</sub> ][VO <sub>2</sub> (C <sub>18</sub> H <sub>12</sub> N <sub>2</sub> O <sub>2</sub> )]·2H <sub>2</sub> O |
| <b>Mean</b>                                                       | <b>2.422 + 2.418 Å/2 structures</b>                   |                                                                                                                                                                                                                                                                                                                                                                                                                                       |
| <b>[Na<sub>2</sub>(H<sub>2</sub>O)<sub>10</sub>]<sup>2+</sup></b> |                                                       |                                                                                                                                                                                                                                                                                                                                                                                                                                       |
| DOGQOG                                                            | 2.371 + 2.423 Å<br>3.543 Å                            | Breen, J. M.; Schmitt, W. <i>Angew. Chem., Int. Ed.</i> <b>2008</b> , 47, 6904.                                                                                                                                                                                                                                                                                                                                                       |
| OWOJAO                                                            | 2.381 + 2.552 Å                                       | [Na <sub>2</sub> (H <sub>2</sub> O) <sub>10</sub> ][As <sub>4</sub> Na <sub>4</sub> V <sub>5</sub> C <sub>27</sub> H <sub>59</sub> N <sub>5</sub> O <sub>36</sub> ] <sub>2</sub> ·2(CH <sub>3</sub> ) <sub>2</sub> NCHO·3H <sub>2</sub> O                                                                                                                                                                                             |
|                                                                   | 3.611 Å                                               | Miyamoto, K.; Saito, M.; Tsuji, S.; Takagi, T.; Shiro, M.; Uchiyama, M.; Ochiai, M. <i>J. Am. Chem. Soc.</i> <b>2021</b> , 143, 9327. [Na <sub>2</sub> (H <sub>2</sub> O) <sub>10</sub> ]( <i>o</i> -C <sub>6</sub> H <sub>4</sub> (BrO)(COO)) <sub>2</sub>                                                                                                                                                                           |
| ONETEJ                                                            | 2.390 + 2.454 Å<br>3.533 Å                            | Starynowicz, P. <i>New. J. Chem.</i> <b>2021</b> , 45, 5879. [Na <sub>2</sub> (H <sub>2</sub> O) <sub>10</sub> ][EuNa <sub>5</sub> C <sub>12</sub> H <sub>42</sub> N <sub>4</sub> O <sub>21</sub> P <sub>4</sub> ]·12H <sub>2</sub> O                                                                                                                                                                                                 |

|          |                 |                                                                                                                                                                                                                                                                                                                       |
|----------|-----------------|-----------------------------------------------------------------------------------------------------------------------------------------------------------------------------------------------------------------------------------------------------------------------------------------------------------------------|
| XIJXOG   | 2.402 + 2.377 Å | Oldknow, S.; Martir, D. R.; Pritchard, V. E.; Blitz, M. A.; Fishwick, C. G.; Zysman-Colman, E.; Hardie,                                                                                                                                                                                                               |
|          | 3.565 Å         | M. J. <i>Chem. Sci.</i> <b>2018</b> , <i>9</i> , 8150. [Na <sub>2</sub> (H <sub>2</sub> O) <sub>10</sub> ](C <sub>12</sub> H <sub>8</sub> N <sub>3</sub> O <sub>2</sub> ) <sub>2</sub>                                                                                                                                |
| ASOMOM   | 2.408 + 2.411 Å | Angeloski, A.; Hook, J. M.; Bhadbhade, M.; Baker, A. T.; McDonagh, A. M. <i>CrystEngComm</i> <b>2016</b> , <i>18</i> ,                                                                                                                                                                                                |
|          | 3.480 Å         | 7070. [Na <sub>2</sub> (H <sub>2</sub> O) <sub>10</sub> ](S <sub>2</sub> CN(CH(CH) <sub>3</sub> ) <sub>2</sub> ) <sub>2</sub>                                                                                                                                                                                         |
| ECEPIL   | 2.411 + 2.432 Å | Nathan, L. C.; Mai, T. D. <i>J. Chem. Cryst.</i> <b>2000</b> , <i>30</i> , 509.                                                                                                                                                                                                                                       |
|          | 3.705 Å         | [Na <sub>2</sub> (H <sub>2</sub> O) <sub>10</sub> ][Ni(C <sub>7</sub> H <sub>3</sub> NO <sub>4</sub> )(C <sub>7</sub> H <sub>4</sub> NO <sub>4</sub> ) <sub>2</sub> ]·13H <sub>2</sub> O                                                                                                                              |
| IGUXAL   | 2.416 + 2.441 Å | Konieczny, K.; Bakowicz, J.; Turowska-Tyrk, I. <i>Acta Crystallogr., Sect. C</i> <b>2015</b> , <i>71</i> , 410.                                                                                                                                                                                                       |
|          | 3.504 Å         | [Na <sub>2</sub> (H <sub>2</sub> O) <sub>10</sub> ](C <sub>23</sub> H <sub>27</sub> O <sub>3</sub> ) <sub>2</sub> ·2H <sub>2</sub> O                                                                                                                                                                                  |
| KUHGUS   | 2.417 + 2.446 Å | Konieczny, K.; Bakowicz, J.; Turowska-Tyrk, I. <i>Acta Crystallogr., Sect. C</i> <b>2015</b> , <i>71</i> , 410.                                                                                                                                                                                                       |
|          | 3.504 Å         | [Na <sub>2</sub> (H <sub>2</sub> O) <sub>10</sub> ](C <sub>23</sub> H <sub>27</sub> O <sub>3</sub> ) <sub>2</sub> ·2H <sub>2</sub> O                                                                                                                                                                                  |
| SIRGOQ   | 2.423 + 2.414 Å | Yamada, M.; Kondo, Y.; Akimoto, K.; Kabuto, C.; Hamada, F. <i>New J. Chem.</i> <b>2007</b> , <i>31</i> , 1874.                                                                                                                                                                                                        |
|          | 3.626 Å         | [Na <sub>2</sub> (H <sub>2</sub> O) <sub>10</sub> ](C <sub>10</sub> H <sub>22</sub> O <sub>24</sub> S <sub>12</sub> )·16H <sub>2</sub> O                                                                                                                                                                              |
| KOTRUJ   | 2.426 + 2.411 Å | Li, Z.; Zhang, J.; Lin, L.-D.; Liu, J.-H.; Li, X.-X.; Zheng, S.-T. <i>Chem. Commun.</i> <b>2019</b> , <i>55</i> , 11735.                                                                                                                                                                                              |
|          | 3.487 Å         | [Na <sub>2</sub> (H <sub>2</sub> O) <sub>10</sub> ] <sub>2</sub> [Cu(H <sub>2</sub> O) <sub>2</sub> (C <sub>3</sub> H <sub>10</sub> N <sub>2</sub> ) <sub>2</sub> ][Cu <sub>4</sub> Ta <sub>12</sub> C <sub>18</sub> H <sub>62</sub> N <sub>12</sub> O <sub>38</sub> ]·26H <sub>2</sub> O                             |
| 422705   | 2.429 + 2.414 Å | Oreshkina, A. V.; Kaziev, G. Z.; Holguin Quinones, S.; Stash, A. I.; Shipilova, P. A. <i>Koord. Khim.</i> <b>2011</b> , <i>37</i> , 848. [Na <sub>2</sub> (H <sub>2</sub> O) <sub>10</sub> ][Na(H <sub>2</sub> O) <sub>3</sub> ] <sub>2</sub> [MnW <sub>6</sub> O <sub>18</sub> (OH) <sub>6</sub> ]·6H <sub>2</sub> O |
|          | 3.451 Å         |                                                                                                                                                                                                                                                                                                                       |
| KOTSIY   | 2.431 + 2.416 Å | Li, Z.; Zhang, J.; Lin, L.-D.; Liu, J.-H.; Li, X.-X.; Zheng, S.-T. <i>Chem. Commun.</i> <b>2019</b> , <i>55</i> , 11735.                                                                                                                                                                                              |
|          | 3.430 Å         | [Na <sub>2</sub> (H <sub>2</sub> O) <sub>10</sub> ] <sub>2</sub> [Cu(H <sub>2</sub> O) <sub>2</sub> (NH <sub>2</sub> (CH <sub>2</sub> ) <sub>2</sub> NH <sub>2</sub> ) <sub>2</sub> ][Cu <sub>3</sub> Ta <sub>12</sub> C <sub>8</sub> H <sub>34</sub> N <sub>8</sub> O <sub>38</sub> ]·6H <sub>2</sub> O              |
| MAJKUE   | 2.448 + 2.379 Å | Li, G.-B.; Yang, S.-H.; Xiong, M.; Lin, J.-H. <i>Acta Crystallogr., Sect. C</i> <b>2004</b> , <i>60</i> , m612.                                                                                                                                                                                                       |
|          | 3.593 Å         | (H <sub>3</sub> N(CH <sub>2</sub> ) <sub>2</sub> NH <sub>3</sub> ) <sub>2</sub> [Na <sub>2</sub> (H <sub>2</sub> O) <sub>10</sub> ][V <sub>10</sub> O <sub>28</sub> ]                                                                                                                                                 |
| GUBQAY   | 2.457 + 2.455 Å | Huang, W.; Tang, Y.; Imler, G. H.; Parrish, D. A.; Shreeve, J. M. <i>J. Am. Chem. Soc.</i> <b>2020</b> , <i>142</i> ,                                                                                                                                                                                                 |
|          | 3.492 Å         | 3652. [Na <sub>2</sub> (H <sub>2</sub> O) <sub>10</sub> ](C <sub>4</sub> H <sub>2</sub> ClN <sub>6</sub> O) <sub>2</sub>                                                                                                                                                                                              |
| VOGXEX01 | 2.459 + 2.452 Å | Mu, X.; Axtell, J. C.; Bernier, N. A.; Kirlikovali, K. O.; Jung, D.; Umanzor, A.; Qian, K.; Chen, X.;                                                                                                                                                                                                                 |
|          | 3.740 Å         | Bay, K. L.; Kirollos, M.; Rheingold, A. L.; Houk, K. N.; Spokoyny, A. M. <i>Cell Press: Chem.</i> <b>2019</b> ,                                                                                                                                                                                                       |
|          |                 | 5,                                                                                                                                                                                                                                                                                                                    |
|          |                 | 2461. [Na <sub>2</sub> (H <sub>2</sub> O) <sub>10</sub> ](C <sub>13</sub> H <sub>13</sub> B <sub>6</sub> I <sub>5</sub> P) <sub>2</sub> ·2H <sub>2</sub> O                                                                                                                                                            |
| HEFYOH   | 2.460 + 2.420 Å | Schmidt, M. U.; Schmiermund, T.; Bolte, M. <i>Acta Crystallogr., Sect. C</i> <b>2006</b> , <i>62</i> , m37.                                                                                                                                                                                                           |
|          | 3.492 Å         | [Na <sub>2</sub> (H <sub>2</sub> O) <sub>10</sub> ](C <sub>20</sub> H <sub>14</sub> N <sub>2</sub> O <sub>4</sub> )·H <sub>2</sub> O                                                                                                                                                                                  |
| AVUNUA   | 2.475 + 2.423 Å | King, P.; Clerac, R.; Anson, C. E.; Powell, A. K. <i>Dalton Trans.</i> <b>2004</b> , 852.                                                                                                                                                                                                                             |
|          | 3.460 Å         | [Na <sub>2</sub> (H <sub>2</sub> O) <sub>10</sub> ][Ni(H <sub>2</sub> O) <sub>2</sub> (C <sub>5</sub> H <sub>2</sub> N <sub>2</sub> O <sub>4</sub> ) <sub>2</sub>                                                                                                                                                     |

|             |                                                        |                                                                                                                                                                                                                                                                                                                                                                                                                                                                                   |
|-------------|--------------------------------------------------------|-----------------------------------------------------------------------------------------------------------------------------------------------------------------------------------------------------------------------------------------------------------------------------------------------------------------------------------------------------------------------------------------------------------------------------------------------------------------------------------|
| LUWPAX      | 2.490 + 2.424 Å<br>3.733 Å                             | Al-Fayaad, H. .A.; Arachchige, K. S. A.; Clegg, J. K. <i>CrystEngComm</i> <b>2020</b> , <i>22</i> , 5310.<br>[Na <sub>2</sub> (H <sub>2</sub> O) <sub>10</sub> ](C <sub>18</sub> H <sub>10</sub> N <sub>2</sub> O <sub>4</sub> )·C <sub>18</sub> H <sub>10</sub> N <sub>2</sub> O <sub>4</sub> ·8H <sub>2</sub> O                                                                                                                                                                 |
| IYEVOZ      | 2.499 + 2.432 Å<br>3.792 Å                             | Surinwong, S.; Yoshinari, N.; Kojima, T.; Konno, T. <i>Chem. Commun.</i> <b>2016</b> , <i>52</i> , 12893.<br>[Na <sub>2</sub> (H <sub>2</sub> O) <sub>10</sub> ] <sub>9</sub> [Au <sub>6</sub> Co <sub>4</sub> Zn <sub>2</sub> C <sub>64</sub> H <sub>114</sub> N <sub>12</sub> O <sub>28</sub> S <sub>12</sub> ] <sub>2</sub> [Au <sub>3</sub> Co <sub>2</sub> C <sub>30</sub> H <sub>54</sub> N <sub>6</sub> O <sub>12</sub> S <sub>6</sub> ] <sub>2</sub> ·170H <sub>2</sub> O |
| <b>Mean</b> | <b>2.431 + 2.430 Å/19 structures</b><br><b>3.565 Å</b> |                                                                                                                                                                                                                                                                                                                                                                                                                                                                                   |

### *Tetrameric and polymeric sodium hydrate complexes*

ICSD/CSD code  $d(\text{Na-O}_b)+d(\text{Na-O}_t)/d(\text{Na}\cdots\text{Na})/\text{Å}$  Reference, compound formula

[Na<sub>4</sub>(H<sub>2</sub>O)<sub>14</sub>]<sub>n</sub><sup>4+</sup>

|             |                             |                                                                                                                                                                                                                                                                                                                                                                                                                                  |
|-------------|-----------------------------|----------------------------------------------------------------------------------------------------------------------------------------------------------------------------------------------------------------------------------------------------------------------------------------------------------------------------------------------------------------------------------------------------------------------------------|
| WAPZOE      | 2.391 Å<br>3.301 Å          | Kinnibrugh, T.; Garcia, N.; Clearfield, A. <i>J. Solid State Chem.</i> <b>2012</b> , <i>187</i> , 149.<br>((CH <sub>3</sub> ) <sub>2</sub> NH) <sub>2n</sub> [Na <sub>4</sub> (H <sub>2</sub> O) <sub>14</sub> ] <sub>n</sub> (O <sub>3</sub> P(C <sub>6</sub> H <sub>5</sub> ) <sub>2</sub> PO <sub>3</sub> )(O <sub>3</sub> P(C <sub>6</sub> H <sub>5</sub> ) <sub>2</sub> PO <sub>3</sub> H) <sub>n</sub> ·2nH <sub>2</sub> O |
| LIQFUN01    | 2.402 Å<br>3.443 Å          | Oyama, H.; Miyamoto, T.; Sekine, A.; Nugrahani, I.; Uekusa, H. <i>Crystals</i> <b>2021</b> , <i>11</i> , 412.<br>[Na <sub>4</sub> (H <sub>2</sub> O) <sub>14</sub> ] <sub>n</sub> [C <sub>14</sub> H <sub>10</sub> Cl <sub>2</sub> NO <sub>2</sub> ] <sub>4n</sub> ·5nH <sub>2</sub> O                                                                                                                                           |
| LAYCAQ      | 2.462 Å<br>3.678 Å          | Franca, M. C. K.; Eon, J.-G.; Fournier, M.; Payen, E.; Mentre, O. <i>Solid State Sci.</i> <b>2005</b> , <i>7</i> , 1533. ((CH <sub>3</sub> ) <sub>4</sub> N) <sub>2n</sub> [Na <sub>4</sub> (H <sub>2</sub> O) <sub>14</sub> ] <sub>n</sub> [W <sub>6</sub> O <sub>19</sub> ] <sub>n</sub> (SO <sub>4</sub> ) <sub>n</sub>                                                                                                       |
| ROPYAW      | 2.503 Å                     | Loose, I.; Boesing, M.; Klein, K.; Krebs, B.; Schulz, R. P.; Scharbert, B. <i>Inorg. Chim. Acta</i> <b>1997</b> , <i>263</i> , 99. [Na <sub>2</sub> (H <sub>2</sub> O) <sub>14</sub> ] <sub>n</sub> (N(CH <sub>3</sub> ) <sub>4</sub> ) <sub>2</sub> (Co <sub>2</sub> Na <sub>2</sub> H <sub>26</sub> W <sub>12</sub> O <sub>54</sub> ) <sub>n</sub> ·2nH <sub>2</sub> O                                                         |
| <b>Mean</b> | <b>2.452 Å/3 structures</b> |                                                                                                                                                                                                                                                                                                                                                                                                                                  |

[Na<sub>4</sub>(H<sub>2</sub>O)<sub>16</sub>]<sub>n</sub><sup>4+</sup>

|        |                            |                                                                                                                                                                                                                                                                                    |
|--------|----------------------------|------------------------------------------------------------------------------------------------------------------------------------------------------------------------------------------------------------------------------------------------------------------------------------|
| YEGTEN | 2.431 + 2.363 Å<br>3.338 Å | Patra, D.; Pal, A.; Nath, S.; Kundu, R.; Drew, M. G. B.; Ghosh, T. <i>J. Bioinorg. Chem.</i> <b>2022</b> , <i>234</i> , 111900. [Na <sub>4</sub> (H <sub>2</sub> O) <sub>16</sub> ][VO <sub>2</sub> (C <sub>17</sub> H <sub>14</sub> N <sub>2</sub> O <sub>3</sub> )] <sub>4</sub> |
|--------|----------------------------|------------------------------------------------------------------------------------------------------------------------------------------------------------------------------------------------------------------------------------------------------------------------------------|

[Na<sub>4</sub>(H<sub>2</sub>O)<sub>16</sub>]<sub>n</sub><sup>4+</sup>

|        |                            |                                                                                                                                                                                                                                                                                                                      |
|--------|----------------------------|----------------------------------------------------------------------------------------------------------------------------------------------------------------------------------------------------------------------------------------------------------------------------------------------------------------------|
| NIBDIN | 2.342 + 2.524 Å<br>3.313 Å | Beckmann, J.; Duthie, A.; Gesing, T. M.; Koehne, T.; Lork, E. <i>Organometallics</i> <b>2012</b> , <i>31</i> , 3451.<br>[Na <sub>4</sub> (H <sub>2</sub> O) <sub>16</sub> ] <sub>n</sub> (I-N(CH <sub>3</sub> ) <sub>2</sub> -8-TeO <sub>2</sub> -C <sub>10</sub> H <sub>6</sub> ) <sub>4n</sub> ·4nH <sub>2</sub> O |
| NABSEQ | 2.369 + 2.448 Å<br>3.360 Å | Marino, N.; Vortherms, A. R.; Hoffman, A. E.; Doyle, R. P. <i>Inorg. Chem.</i> <b>2010</b> , <i>49</i> , 6790.<br>[Na <sub>4</sub> (H <sub>2</sub> O) <sub>16</sub> ] <sub>n</sub> [Cu(H <sub>2</sub> O)(N <sub>2</sub> C <sub>12</sub> H <sub>8</sub> )(P <sub>2</sub> O <sub>7</sub> )] <sub>n</sub>               |
| DARNIU | 2.405 + 2.418 Å<br>3.456 Å | Yi, X.-Y.; Liu, B.; Jimenez-Aparicio, R.; Urbanos, F.A. Gao, S.; Xu, W.; Chen, J.-S.; Song, Y.; Zheng, L.-M. <i>Inorg. Chem.</i> <b>2005</b> , <i>44</i> , 4309. [Na <sub>4</sub> (H <sub>2</sub> O) <sub>16</sub> ] <sub>n</sub> [RuC <sub>4</sub> H <sub>8</sub> ClO <sub>14</sub> P <sub>4</sub> ] <sub>n</sub>   |

|                                                                               |                                     |                                                                                                                                                                                                                                                                                         |
|-------------------------------------------------------------------------------|-------------------------------------|-----------------------------------------------------------------------------------------------------------------------------------------------------------------------------------------------------------------------------------------------------------------------------------------|
| DARNOA                                                                        | 2.420 + 2.412 Å                     | Yi, X.-Y.; Liu, B.; Jimenez-Aparicio, R.; Urbanos, F.A. Gao, S.; Xu, W.; Chen, J.-S.; Song, Y.; Zheng,                                                                                                                                                                                  |
|                                                                               | 3.453 Å                             | L.-M. <i>Inorg. Chem.</i> <b>2005</b> , <i>44</i> , 4309. [Na <sub>4</sub> (H <sub>2</sub> O) <sub>16</sub> ] <sub>n</sub> [RuC <sub>4</sub> H <sub>8</sub> BrO <sub>14</sub> P <sub>4</sub> ] <sub>n</sub>                                                                             |
| XIJFOM                                                                        | 3.432 + 2.355 Å                     | Dinoi, C.; Taban, G.; Sozen, P.; Demirhan, F.; Daran, J.-C.; Poli, R. <i>J. Organometal. Chem.</i> <b>2007</b> ,                                                                                                                                                                        |
|                                                                               | 3.326 Å                             | 692, 3743. [Na <sub>4</sub> (H <sub>2</sub> O) <sub>16</sub> ][MoO <sub>3</sub> (C <sub>5</sub> H <sub>5</sub> )] <sub>4</sub> ·4H <sub>2</sub> O                                                                                                                                       |
| <b>Mean</b>                                                                   | <b>2.393 + 2.431 Å/5 structures</b> |                                                                                                                                                                                                                                                                                         |
|                                                                               | <b>3.381 Å</b>                      |                                                                                                                                                                                                                                                                                         |
| <b>[Na<sub>4</sub>(H<sub>2</sub>O)<sub>18</sub>]<sub>n</sub><sup>4+</sup></b> |                                     |                                                                                                                                                                                                                                                                                         |
| 240730                                                                        | 2.449 Å                             | Lu Hui; Fu Yunlong; Yang Junying; Ng Seik Weng <i>Acta Crystallogr., Sect E</i> <b>2007</b> , <i>63</i> , m316.                                                                                                                                                                         |
|                                                                               |                                     | [Na <sub>4</sub> (H <sub>2</sub> O) <sub>18</sub> ] <sub>n</sub> [La <sub>2</sub> (C <sub>2</sub> O <sub>4</sub> ) <sub>5</sub> ] <sub>n</sub>                                                                                                                                          |
| ECEPEH                                                                        | 2.442 Å                             | Nathan, L. C.; Mai, T. D. <i>J. Chem. Cryst.</i> <b>2000</b> , <i>30</i> , 509.                                                                                                                                                                                                         |
|                                                                               | 4.316 Å                             | [Na <sub>4</sub> (H <sub>2</sub> O) <sub>18</sub> ][Co(H <sub>2</sub> O) <sub>6</sub> ][CoC <sub>14</sub> H <sub>6</sub> N <sub>2</sub> O <sub>8</sub> ] <sub>2</sub> [Co <sub>2</sub> C <sub>28</sub> H <sub>24</sub> N <sub>4</sub> O <sub>11</sub> ] <sub>1</sub> ·4H <sub>2</sub> O |
| <b>Mean</b>                                                                   | <b>2.446 Å/2 structures</b>         |                                                                                                                                                                                                                                                                                         |
| <b>[Na<sub>5</sub>(H<sub>2</sub>O)<sub>18</sub>]<sub>n</sub><sup>5+</sup></b> |                                     |                                                                                                                                                                                                                                                                                         |
| EDABEU                                                                        | 2.437 + 2.319 Å                     | Carrasco, C. J.; Montilla, F.; Alvarez, E.; Calderon-Montano, J. M.; Lopez-Lazaro, M.; Galindo, A. <i>J.</i>                                                                                                                                                                            |
|                                                                               | 3.179 Å                             | <i>Bioinorg. Chem.</i> <b>2022</b> , <i>235</i> , 111924.                                                                                                                                                                                                                               |
|                                                                               |                                     | [Na <sub>5</sub> (H <sub>2</sub> O) <sub>18</sub> ] <sub>2</sub> [AgC <sub>14</sub> N <sub>13</sub> N <sub>4</sub> O <sub>8</sub> ] <sub>2</sub> ·4H <sub>2</sub> O                                                                                                                     |
| <b>[Na<sub>5</sub>(H<sub>2</sub>O)<sub>21</sub>]<sub>n</sub><sup>5+</sup></b> |                                     |                                                                                                                                                                                                                                                                                         |
| ATIVAD                                                                        | 2.415 + 2.352 Å                     | Jiang, L.; Hu, C. T.; De Riccardis, F.; Kirshenbaum, K. <i>Cryst. Growth Des.</i> <b>2021</b> , <i>21</i> , 3889.                                                                                                                                                                       |
|                                                                               | 3.589 Å                             | [Na <sub>5</sub> (H <sub>2</sub> O) <sub>21</sub> ] <sub>2</sub> [Na <sub>2</sub> C <sub>60</sub> N <sub>72</sub> N <sub>12</sub> O <sub>36</sub> ] <sub>1</sub> ·12H <sub>2</sub> O                                                                                                    |
| <b>[Na<sub>8</sub>(H<sub>2</sub>O)<sub>24</sub>]<sub>n</sub><sup>8+</sup></b> |                                     |                                                                                                                                                                                                                                                                                         |
| YOMHOY                                                                        | 2.428 + 2.504 Å                     | Wang, L.; Chu, Z.; Huang, W.; Gou, S. <i>Inorg. Chem. Commun.</i> <b>2009</b> , <i>12</i> , 4.                                                                                                                                                                                          |
|                                                                               |                                     | [Na <sub>8</sub> (H <sub>2</sub> O) <sub>24</sub> ] <sub>n</sub> (C <sub>26</sub> H <sub>22</sub> N <sub>2</sub> O <sub>4</sub> ) <sub>4n</sub>                                                                                                                                         |

**Table S1c.** Summary of solid state structures containing a hydrated potassium ion. The ICSD/CDS code refers to the code in the Inorganic Crystal Structure Database (ICSD, number) and Cambridge Structure Database (CSD, letters), respectively, and the mean K-O bond distance,  $d(\text{K-O})$ . Data in purple text are not included in the mean distance as they are uncertain or differ significantly from the mean value.

### Potassium(I)

#### Six-coordination

| ICSD/CSD code | $d(\text{K-O})$ | Reference, compound formula                                                                                                                                                                                                            |
|---------------|-----------------|----------------------------------------------------------------------------------------------------------------------------------------------------------------------------------------------------------------------------------------|
| GUGNUR        | 1.584 Å         | Andrade-Lopez, N.; Cartas-Rosado, R.; Garcia-Baez, E.; Contreras, R.; Tlahuext, H. <i>Heteroat. Chem.</i> <b>1998</b> , 9, 399. $[\text{K}(\text{H}_2\text{O})_6](\text{C}_8\text{H}_9\text{BN}_5\text{O}_2) \cdot \text{H}_2\text{O}$ |
| RUGXAS        | 2.830 Å         | Wang, R.-Y.; Li, J.-R.; Jin, T.-Z.; Xu, G.-X.; Zhou, Z.-Y.; Zhou, X.-G. <i>Polyhedron</i> <b>1997</b> , 16, 1361. $[\text{K}(\text{H}_2\text{O})_6][\text{KLaC}_{18}\text{H}_{26}\text{N}_4\text{O}_{13}] \cdot 2\text{H}_2\text{O}$   |
| EVUWAV        | 2.911 Å         | Vinokur, V. I.; Guzei I. A. CCDC deposition number 1507365, <b>2016</b> . $[\text{K}(\text{H}_2\text{O})_6][\text{Al}(\text{H}_2\text{O})_6](\text{SO}_4)_2$                                                                           |

#### Seven-coordination

| ICSD/CSD code | $d(\text{K-O})$ | Reference, compound form                                                                                                                                                                                                                                                                         |
|---------------|-----------------|--------------------------------------------------------------------------------------------------------------------------------------------------------------------------------------------------------------------------------------------------------------------------------------------------|
| EHECUS        | 2.400 Å         | Liu, Y.; Qi, X.; Zhang, W.; Yin, P.; Cai, Z.; Zhang, Q. <i>Org. Lett.</i> <b>2021</b> , 23, 734. $[\text{K}(\text{H}_2\text{O})_7]\text{C}_6\text{H}_4\text{N}_7\text{O}_2 \cdot \text{C}_6\text{H}_5\text{N}_7\text{O}_2 \cdot 2\text{H}_2\text{O}$                                             |
| YIQQOG        | 2.894 Å         | Igashira-Kamiyama, A.; Fukushima, A.; Konno, T. <i>Chem. Eur. J.</i> <b>2013</b> , 19, 16532. $[\text{K}(\text{H}_2\text{O})_7][\text{Fe}(\text{C}_{12}\text{H}_8\text{N}_2)_3]_2[\text{Au}_3\text{Ni}_2\text{C}_{30}\text{H}_{54}\text{N}_6\text{O}_{12}\text{S}_6] \cdot 30\text{H}_2\text{O}$ |
| YIQQAS        | 2.923 Å         | Igashira-Kamiyama, A.; Fukushima, A.; Konno, T. <i>Chem. Eur. J.</i> <b>2013</b> , 19, 16532. $[\text{K}(\text{H}_2\text{O})_7][\text{Ni}(\text{C}_{12}\text{H}_8\text{N}_2)_3]_2[\text{Au}_3\text{Ni}_2\text{C}_{30}\text{H}_{54}\text{N}_6\text{O}_{12}\text{S}_6] \cdot 30\text{H}_2\text{O}$ |

**Mean**            **2.909 Å/2 structures**

#### Eight-coordination

| ICSD/CSD code | $d(\text{K-O})$ | Reference, compound form                                                                                                                                                                                                                                                                    |
|---------------|-----------------|---------------------------------------------------------------------------------------------------------------------------------------------------------------------------------------------------------------------------------------------------------------------------------------------|
| OCUVUF        | 2.896 Å         | Ritchie, C.; Miller, C. E.; Boskovic, C. <i>Dalton Trans.</i> <b>2001</b> , 40, 12037. $\text{K}_7\text{Na}_2[\text{K}(\text{H}_2\text{O})_8][\text{As}_4\text{Dy}_4\text{K}_4\text{W}_{42}\text{C}_{24}\text{H}_{52}\text{N}_4\text{O}_{170}] \cdot 40\text{H}_2\text{O}$                  |
| JOSFOO        | 2.898 Å         | Srivastava, A. K.; Praveenkumar, B.; Mahawar, I. K.; Divya, P.; Shalini S.; Boomishankar, R. <i>Chem. Mater.</i> <b>2014</b> , 26, 3811. $[\text{K}(\text{H}_2\text{O})_8][\text{Cu}_4\text{C}_{128}\text{H}_{128}\text{N}_{21}\text{P}_8](\text{NO}_3)_6 \cdot 9\text{H}_2\text{O}$        |
| FEGMUC        | 3.047 Å         | Srivastava, A. K.; Vijayakanth, T.; Divya, P.; Praveenkumar, B.; Steiner, A.; Boomishankar, R. <i>J. Mater. Chem. C</i> <b>2017</b> , 5, 7352. $[\text{K}(\text{H}_2\text{O})_8][\text{Ni}_4\text{C}_{128}\text{H}_{136}\text{O}_{16}\text{P}_8](\text{NO}_3)_9 \cdot 17\text{H}_2\text{O}$ |

FEGNEN 3.059 Å Srivastava, A. K. ; Vijayakanth, T. ; Divya, P. ; Praveenkumar, B. ; Steiner, A. ; Boomishankar, R. *J. Mater. Chem. C* **2017**, 5, 7352.  $[\text{K}(\text{H}_2\text{O})_8][\text{Co}_4\text{C}_{128}\text{H}_{136}\text{O}_{16}\text{P}_8](\text{NO}_3)_9 \cdot 23\text{H}_2\text{O}$

**Mean 2.897 Å/2 structures**

*Dimeric hydrated potassium complexes*

*Six-coordination*

ICSD/CSD code  $d(\text{K}-\text{O}_b)+d(\text{K}-\text{O}_t)/d(\text{K}\cdots\text{K})/\text{Å}$  Reference, compound formula

$[\text{K}_2(\text{H}_2\text{O})_9]^{2+}$

$d(\text{K}-\text{O}_b)+d(\text{K}-\text{O}_t)/d(\text{K}\cdots\text{K})/\text{Å}$

CAMKIN 2.287 + 2.463 Å  
3.126 Å

Barats-Damatov, D.; Shimon, L. J. W.; Neumann, R. *Eur. J. Inorg. Chem.* **2013**, 1649.  
 $\text{Na}_3[\text{K}_2(\text{H}_2\text{O})_9][\text{KOs}_2\text{W}_9\text{C}_{12}\text{H}_{36}\text{O}_{39}\text{S}_6] \cdot 6\text{H}_2\text{O}$



**Table S1d.** Summary of solid state structures containing a hydrated rubidium ion. The ICSD/CDS code refers to the code in the Inorganic Crystal Structure Database (ICSD, number) and Cambridge Structure Database (CSD, letters), respectively, and the mean Rb-O bond distance,  $d(\text{Rb-O})$ . Data in purple text are not included in the mean distance as they are uncertain or differ significantly from the mean value.

### Rubidium(I)

#### *Nine-coordination*

| ICSD/CSD code | $d(\text{Rb-O})$ | Reference, compound formula                                                                                                                                                                                                                                                                       |
|---------------|------------------|---------------------------------------------------------------------------------------------------------------------------------------------------------------------------------------------------------------------------------------------------------------------------------------------------|
| FEGMOW        | 3.187 Å          | Srivastava, A. K. ; Vijayakanth, T. ; Divya, P. ; Praveenkumar, B. ; Steiner, A. ; Boomishankar, R. <i>J. Mater. Chem. C</i> <b>2017</b> , 5, 7352. $[\text{Rb}(\text{H}_2\text{O})_9][\text{Ni}_4\text{C}_{128}\text{H}_{136}\text{O}_{16}\text{P}_8](\text{NO}_3)_9 \cdot 20\text{H}_2\text{O}$ |
| FEGLOV        | 3.189 Å          | Srivastava, A. K. ; Vijayakanth, T. ; Divya, P. ; Praveenkumar, B. ; Steiner, A. ; Boomishankar, R. <i>J. Mater. Chem. C</i> <b>2017</b> , 5, 7352. $[\text{Rb}(\text{H}_2\text{O})_9][\text{Co}_4\text{C}_{128}\text{H}_{136}\text{O}_{16}\text{P}_8](\text{NO}_3)_9 \cdot 27\text{H}_2\text{O}$ |

**Table S1e.** Summary of solid state structures containing a hydrated cesium ion. The ICSD/CDS code refers to the code in the Inorganic Crystal Structure Database (ICSD, number) and Cambridge Structure Database (CSD, letters), respectively, and the mean Cs-O bond distance,  $d(\text{Cs-O})$ . Data in purple text are not included in the mean distance as they are uncertain or differ significantly from the mean value.

### Cesium(I)

#### *Ten-coordination*

| ICSD/CSD code | $d(\text{Cs-O})$ | Reference, compound formula                                                                                                                                                                                                                                                                          |
|---------------|------------------|------------------------------------------------------------------------------------------------------------------------------------------------------------------------------------------------------------------------------------------------------------------------------------------------------|
| FEGMIQ        | 3.299 Å          | Srivastava, A. K. ; Vijayakanth, T. ; Divya, P. ; Praveenkumar, B. ; Steiner, A. ; Boomishankar, R. <i>J. Mater. Chem. C</i> <b>2017</b> , 5, 7352. $[\text{Cs}(\text{H}_2\text{O})_{10}][\text{Ni}_4\text{C}_{128}\text{H}_{136}\text{O}_{16}\text{P}_8](\text{NO}_3)_9 \cdot 17\text{H}_2\text{O}$ |
| FEGLEL        | 3.310 Å          | Srivastava, A. K. ; Vijayakanth, T. ; Divya, P. ; Praveenkumar, B. ; Steiner, A. ; Boomishankar, R. <i>J. Mater. Chem. C</i> <b>2017</b> , 5, 7352. $[\text{Cs}(\text{H}_2\text{O})_{10}][\text{Co}_4\text{C}_{128}\text{H}_{136}\text{O}_{16}\text{P}_8](\text{NO}_3)_9 \cdot 25\text{H}_2\text{O}$ |

**Table S1f.** Summary of solid state structures containing a hydrated beryllium ion. The ICSD/CDS code refers to the code in the Inorganic Crystal Structure Database (ICSD, number) and Cambridge Structure Database (CSD, letters), respectively, and the mean Be-O bond distance,  $d(\text{Be-O})$ . Data in purple text are not included in the mean distance as they are uncertain or differ significantly from the mean value.

## Beryllium(II)

### Four-coordination, tetrahedral configuration

| ICSD/CSD code | $d(\text{Be-O})$ | Reference, compound formula                                                                                                                                                                                            |
|---------------|------------------|------------------------------------------------------------------------------------------------------------------------------------------------------------------------------------------------------------------------|
| 74577         | 1.607 Å          | Kellersohn, T.; Delaplane, R. G.; Olovsson, I. <i>Acta Crystallogr., Sect. B</i> <b>1994</b> , 50, 316. $[\text{Be}(\text{H}_2\text{O})_4]\text{SO}_4$ .                                                               |
| 417642        | 1.607 Å          | Massa, W.; Dehnicke, K. <i>Z. Anorg. Allg. Chem.</i> <b>2007</b> , 633, 1366. $[\text{Be}(\text{H}_2\text{O})_4]\text{Cl}_2$ .                                                                                         |
| KIDREU        | 1.607 Å          | Robl, C.; Hentschel, S. <i>Z. Naturforsch., Teil B</i> <b>1990</b> , 45, 1499. $[\text{Be}(\text{H}_2\text{O})_4](\text{OOC}\text{C}\text{C}\text{C}\text{C}\text{O})$                                                 |
| 74576         | 1.608 Å          | Kellersohn, T.; Delaplane, R. G.; Olovsson, I. <i>Acta Crystallogr., Sect. B</i> <b>1994</b> , 50, 316. $[\text{Be}(\text{H}_2\text{O})_4]\text{SO}_4$ .                                                               |
| 150083        | 1.609 Å          | Wildner, M.; Stoilova, D.; Georgiev, M.; Karadjova, V. <i>J. Mol. Struct.</i> <b>2004</b> , 707, 123. $[\text{Be}(\text{H}_2\text{O})_4]\text{SeO}_4$ .                                                                |
| CADZIS        | 1.609 Å          | Fischer, N.; Klapotke, T. M.; Peters, K.; Rusan, M.; Stierstorfer, J. <i>Z. Anorg. Allg. Chem.</i> <b>2011</b> , 637, 1693. $[\text{Be}(\text{H}_2\text{O})_4](\text{C}_2\text{N}_8)\cdot\text{H}_2\text{O}$           |
| KIQPEH        | 1.609            | Klepov, V. V.; Vologzhanina, A. V.; Serezhkina, L. B.; Serezhkin, V. N. <i>Radiokhimiya</i> <b>2012</b> , 54, 500. $[\text{Be}(\text{H}_2\text{O})_4][\text{UO}_2(\text{CH}_3\text{COO})_3]_2$                         |
| 23218         | 1.610 Å          | Dance, I. G.; Freeman, H. C. <i>Acta Crystallogr., Sect B</i> <b>1969</b> , 25, 304. $[\text{Be}(\text{H}_2\text{O})_4]\text{SO}_4$ .                                                                                  |
| 82397         | 1.610 Å          | Zhang, Z.; Lutz, H. D.; Georgiev, M.; Maneva, M. <i>Acta Crystallogr., Sect. C</i> <b>1996</b> , 52, 2660. $[\text{Be}(\text{H}_2\text{O})_4](\text{H}_4\text{IO}_6)_2$ .                                              |
| 74574         | 1.614 Å          | Kellersohn, T.; Delaplane, R. G.; Olovsson, I. <i>Acta Crystallogr., Sect. B</i> <b>1994</b> , 50, 316. $[\text{Be}(\text{H}_2\text{O})_4]\text{SO}_4$ .                                                               |
| 83329         | 1.615 Å          | Lutz, H. D.; Moeller, H.; Maneva, M.; Paulus, W.; Cousson, A.; Lauriat, J. P.; Elkaim, E. <i>Z. Kristallogr.</i> <b>1996</b> , 211, 170. $[\text{Be}(\text{H}_2\text{O})_4](\text{IO}_3)_2$ .                          |
| 15858         | 1.616 Å          | Divjakovic, V.; Edenharter, A.; Nowacki, W.; Ribar, B. <i>Z. Kristallogr., Kristallgeom., Kristallphys., Kristallchem.</i> <b>1976</b> , 144, 314. $[\text{Be}(\text{H}_2\text{O})_6](\text{NO}_3)_2$ .                |
| MINKUP        | 1.616 Å          | Moers, O.; Friedrichs, S.; Blaschette, A.; Jones, P. G. <i>Z. Anorg. Allg. Chem.</i> <b>2002</b> , 628, 589. $[\text{Be}(\text{H}_2\text{O})_4](\text{C}_6\text{H}_4\text{NO}_4\text{S}_2)_2\cdot 2\text{H}_2\text{O}$ |
| KIDREU01      | 1.617 Å          | Robl, C.; Hentschel, S.; McIntyre, G. J. <i>J. Solid State Chem.</i> <b>1992</b> , 96, 318. $[\text{Be}(\text{H}_2\text{O})_4](\text{OOC}\text{C}\text{C}\text{C}\text{C}\text{O})$                                    |
| 23219         | 1.618 Å          | Sikka, S. K.; Chidambaram, R. <i>Acta Crystallogr., Sect. B</i> <b>1969</b> , 25, 310. $[\text{Be}(\text{H}_2\text{O})_4]\text{SO}_4$ .                                                                                |
| INIMAU        | 1.618 Å          | Puchta, R.; Neumuller, B.; Dehnicke, K. <i>Z. Anorg. Allg. Chem.</i> <b>2011</b> , 637, 67. $[\text{Be}(\text{H}_2\text{O})_4]\text{I}_2\cdot 2\text{CH}_3\text{CN}$                                                   |
| 83329         | 1.619 Å          | Lutz, H. D.; Moeller, H.; Maneva, M.; Paulus, W.; Cousson, A.; Lauriat, J. P.; Elkaim, E. <i>Z. Kristallogr.</i> <b>1996</b> , 211, 170. $[\text{Be}(\text{H}_2\text{O})_4](\text{IO}_3)_2$ .                          |

|             |                              |                                                                                                                                                                                                                                        |
|-------------|------------------------------|----------------------------------------------------------------------------------------------------------------------------------------------------------------------------------------------------------------------------------------|
| CICXOC      | 1.619 Å                      | Yasodha, V.; Govindarajan, S.; Low, J. N.; Glidewell, C. <i>Acta Crystallogr., Sect C</i> <b>2007</b> , <i>63</i> , m207.<br>[Be(H <sub>2</sub> O) <sub>4</sub> ](C <sub>7</sub> H <sub>2</sub> O <sub>6</sub> )                       |
| 36555       | 1.620 Å                      | Macicek, J.; Maneva-Petrova, M.; Georgiev, M. <i>Z. Kristallogr.</i> <b>1992</b> , <i>199</i> , 177.<br>[Be(H <sub>2</sub> O) <sub>4</sub> ](IO <sub>3</sub> ) <sub>2</sub> ·2HIO <sub>3</sub> ·2H <sub>2</sub> O.                     |
| 174422      | 1.621 Å                      | Georgiev, M.; Wildner, M.; Marinova, D.; Stoilova, D. <i>Solid State Sci.</i> <b>2010</b> , <i>12</i> , 899.<br>Rb <sub>4</sub> [Be(H <sub>2</sub> O) <sub>4</sub> ](SeO <sub>4</sub> ) <sub>2</sub> (HSeO <sub>4</sub> ) <sub>2</sub> |
| 24228       | 1.685 Å                      | Beevers, C. A.; Lipson, H. <i>Z. Kristallogr., Kristallgeom., Kristallphys., Kristallchem.</i> <b>1932</b> , <i>82</i> , 297.<br>[Be(H <sub>2</sub> O) <sub>4</sub> ]SO <sub>4</sub> .                                                 |
| 36157       | 2.193 Å                      | Schonefeld, P. <i>Z. Kristallogr., Kristallgeom., Kristallphys., Kristallchem.</i> <b>1931</b> , <i>78</i> , 16. [Be(H <sub>2</sub> O) <sub>4</sub> ]SO <sub>4</sub> .                                                                 |
| <b>Mean</b> | <b>1.613 Å/20 structures</b> |                                                                                                                                                                                                                                        |

**Table S1g.** Summary of solid state structures containing a hydrated magnesium ion. The ICSD/CDS code refers to the code in the Inorganic Crystal Structure Database (ICSD, number) and Cambridge Structure Database (CSD, letters), respectively, and the mean Mg-O bond distance,  $d(\text{Mg-O})$ . Data in purple text are not included in the mean distance as they are uncertain or differ significantly from the mean value.

## Magnesium(II)

### Six-coordination, octahedral configuration

| ICSD/CSD code | $d(\text{Mg-O})$ | Reference, compound formula                                                                                                                                                                                                                                                     |
|---------------|------------------|---------------------------------------------------------------------------------------------------------------------------------------------------------------------------------------------------------------------------------------------------------------------------------|
| 52357         | 2.002 Å          | Hofmann, W., <i>Z. Kristallogr., Kristallgeom., Kristallphys., Kristallchem.</i> <b>1931</b> , 78, 279-333; <b>1932</b> , 83, 323-324. $(\text{NH}_4)_2[\text{Mg}(\text{H}_2\text{O})_6](\text{SO}_4)_2$                                                                        |
| POZHUI        | 2.002 Å          | Nouar, F.; Eckert, J.; Eubank, J. F.; Forster, P.; Eddaoudi, M. <i>J. Am. Chem. Soc.</i> <b>2009</b> , 131, 2864. $[\text{Mg}(\text{H}_2\text{O})_6][\text{InC}_{20}\text{H}_4\text{N}_8\text{O}_{16}]$                                                                         |
| 23220         | 2.011 Å          | Braibanti, A.; Tiripicchio, A.; Manotti Lanfredi, A. M.; Bigoli, F. <i>Acta Crystallogr. Sect. B</i> <b>1969</b> , 25, 354-361. $[\text{Mg}(\text{H}_2\text{O})_6](\text{NO}_3)_2$                                                                                              |
| 48112         | 2.020 Å          | Anderson, L.; Lindqvist, O. <i>Acta Crystallogr., Sect. C</i> <b>1984</b> , 40, 584-586. $[\text{Mg}(\text{H}_2\text{O})_6]\text{SO}_3$                                                                                                                                         |
| BOVNIC        | 2.022 Å          | Bahrin, L. G.; Bejan, D.; Shova, S.; Gdaniec, M.; Fronc, M.; Lozan, V.; Janiak, C. <i>Polyhedron</i> <b>2019</b> , 173, 114128. $[\text{Mg}((\text{H}_2\text{O})_6)_2(\text{C}_{46}\text{H}_{37}\text{O}_8)_2(\text{C}_{46}\text{H}_{36}\text{O}_8)]$                           |
| AVOLEE        | 2.029 Å          | Klepov, V. V.; Serezhkina, L. B.; Serezhkin, V. N.; Alekseev, E. V. <i>J. Solid State Chem.</i> <b>2016</b> , 244, 100. $[\text{Mg}(\text{H}_2\text{O})_6][\text{Na}(\text{UO}_2(\text{OOCCH}_3)_3)_3]$                                                                         |
| 24548         | 2.036 Å          | Ferrari, A.; Cavalca, L.; Nardelli, M. <i>Gazz. Chim.</i> <b>1954</b> , 84, 169-174. $\text{Cs}[\text{Mg}(\text{H}_2\text{O})_6]\text{AsO}_4$                                                                                                                                   |
| ASUNOT        | 2.038 Å          | Serezhkin, V. N.; Grigoriev, M. S.; Abdulmyanov, A.R.; Fedoseev, A.M.; Savchenkov, A. V.; Serezhkina, L. B. <i>Inorg. Chem.</i> <b>2016</b> , 55, 7688. $[\text{Mg}(\text{H}_2\text{O})_6][\text{UO}_2(\text{OOCCH}_3)_3]_2$                                                    |
| 49914         | 2.039 Å          | Duhlev, R.; Faggiani, R.; Brown, I. D. <i>Acta Crystallogr., Sect. C</i> <b>1987</b> , 43, 2046-2048. $\text{Zn}_2[\text{Mg}(\text{H}_2\text{O})_6]\text{Br}_6$                                                                                                                 |
| 24550         | 2.041 Å          | Ferrari, A.; Cavalca, L.; Nardelli, M. <i>Gazz. Chim.</i> <b>1955</b> , 85, 1232-1238. $\text{Cs}[\text{Mg}(\text{H}_2\text{O})_6]\text{PO}_4$                                                                                                                                  |
| 26744         | 2.042 Å          | Andress, K. R.; Gundermann, J. <i>Z. Kristallogr., Kristallgeom., Kristallphys., Kristallchem.</i> <b>1934</b> , 87, 345-369. $[\text{Mg}(\text{H}_2\text{O})_6]\text{Cl}_2$                                                                                                    |
| QEZKEM        | 2.042 Å          | Matovic, Z. D.; Meetsa, A.; Miletic, V. D.; van Koningsbruggen, P. J. <i>Inorg. Chim. Acta</i> <b>2007</b> , 360, 2420. $[\text{Mg}(\text{H}_2\text{O})_6][\text{CuC}_8\text{H}_{13}\text{N}_2\text{O}_7]_2 \cdot 2\text{H}_2\text{O}$                                          |
| CUNZUJ        | 2.044 Å          | Goedderz, D.; Schafer, T.; Klitsch, J.; Weber, L.; Weber, B.; Fuhr, O.; Buntkowsky, G.; Schonberger, F.; Doering, M. <i>Eur. J. Inorg. Chem.</i> <b>2020</b> , 2444. $[\text{Mg}(\text{H}_2\text{O})_6](\text{C}_{12}\text{H}_8\text{O}_3\text{P})_2 \cdot 2\text{H}_2\text{O}$ |
| 12694         | 2.044 Å          | Zolotarev, Jr., A. A.; Zhitova, E. S.; Krzhizhanovskaya, M. G.; Rassomakhin, M. A.; Shilovskikh, V. V.; Krivovichev, S. V. <i>Minerals</i> <b>2019</b> , 9, 486. $\text{NH}_4[\text{Mg}(\text{H}_2\text{O})_6]\text{Cl}_3$                                                      |

|          |         |                                                                                                                                                                                                                                                                                                                  |
|----------|---------|------------------------------------------------------------------------------------------------------------------------------------------------------------------------------------------------------------------------------------------------------------------------------------------------------------------|
| ERUPAI   | 2.044 Å | Zhang, Z.-T.; Yang, B.-L.; Liu, Q.-G.; Liu, X.-H.; Gao, Z.-W.; Yu, K.-B. <i>Chin. J. Chem.</i> <b>2003</b> , <i>21</i> , 588. [Mg(H <sub>2</sub> O) <sub>6</sub> ](C <sub>16</sub> H <sub>11</sub> O <sub>7</sub> S) <sub>2</sub> ·10H <sub>2</sub> O                                                            |
| DABDEQ   | 2.045 Å | Chen, X.; Liu, Y.-H.; Alexander, A.-M.; Gallucci, J. C.; Hwang, S.-J.; Lingam, H. K.; Huang, Z.; Wang, C.; Li, H.; Zhao, Q.; Ozkan, U. S.; Shore, S. G.; Zhao, J.-C. <i>Chem. Eur. J.</i> <b>2004</b> , <i>10</i> , 7325. [Mg(H <sub>2</sub> O) <sub>6</sub> ]B <sub>12</sub> H <sub>12</sub>                    |
| DABDEQ01 | 2.045 Å | Chen, X.; Liu, Y.-H.; Alexander, A.-M.; Gallucci, J. C.; Hwang, S.-J.; Lingam, H. K.; Huang, Z.; Wang, C.; Li, H.; Zhao, Q.; Ozkan, U. S.; Shore, S. G.; Zhao, J.-C. <i>Chem. Eur. J.</i> <b>2014</b> , <i>20</i> , 7325. [Mg(H <sub>2</sub> O) <sub>6</sub> ]B <sub>12</sub> H <sub>12</sub> ·6H <sub>2</sub> O |
| SEQQIQ   | 2.045 Å | Yisgedu, T. B.; Chen, X.; Lingam, H. K.; Huang, Z.; Highley, A.; Maharrey, S.; Behrens, R.; Shore, S. G.; Zhao, J.-C. <i>J. Phys. Chem. C</i> <b>2011</b> , <i>115</i> , 11713. [Mg(H <sub>2</sub> O) <sub>6</sub> ]B <sub>10</sub> H <sub>10</sub> ·4H <sub>2</sub> O                                           |
| YORYOU   | 2.045 Å | Das, M. C.; Ghosh, S. K.; Sanudo, E. C.; Bharadwaj, P. K. <i>Dalton Trans.</i> <b>2009</b> , 1644. [Mg(H <sub>2</sub> O) <sub>6</sub> ][MgC <sub>16</sub> H <sub>12</sub> N <sub>2</sub> O <sub>16</sub> ]·2H <sub>2</sub> O                                                                                     |
| 36461    | 2.046 Å | Leclaire, A. <i>Acta Crystallogr., Sect. C</i> <b>1985</b> , <i>41</i> , 169. Mn <sub>2</sub> [Mg(H <sub>2</sub> O) <sub>6</sub> ]Br <sub>6</sub> ·6H <sub>2</sub> O                                                                                                                                             |
| 143067   | 2.046 Å | Parafiniuk, J.; Stachowicz, M.; Woźniak, K. <i>Miner. Mag.</i> <b>2021</b> , <i>85</i> , 132. NH <sub>4</sub> [Mg(H <sub>2</sub> O) <sub>6</sub> ]Cl <sub>3</sub>                                                                                                                                                |
| 252873   | 2.046 Å | Serezhkin, V. N.; Grigoriev, M. S.; Abdulmyanov, A. R.; Fedoseev, A.M.; Savchenkov, A. V.; Serezhkina, L. B. <i>Inorg. Chem.</i> <b>2016</b> , <i>55</i> , 7688. [Mg(H <sub>2</sub> O) <sub>6</sub> ][UO <sub>2</sub> (C <sub>2</sub> H <sub>5</sub> COO) <sub>3</sub> ] <sub>2</sub>                            |
| 252874   | 2.046 Å | Serezhkin, V. N.; Grigoriev, M. S.; Abdulmyanov, A. R.; Fedoseev, A.M.; Savchenkov, A. V.; Serezhkina, L. B. <i>Inorg. Chem.</i> <b>2016</b> , <i>55</i> , 7688. [Mg(H <sub>2</sub> O) <sub>6</sub> ][NpO <sub>2</sub> (C <sub>2</sub> H <sub>5</sub> COO) <sub>3</sub> ] <sub>2</sub>                           |
| ASUNUZ   | 2.046 Å | Serezhkin, V. N.; Grigoriev, M. S.; Abdulmyanov, A.R.; Fedoseev, A.M.; Savchenkov, A. V.; Serezhkina, L. B. <i>Inorg. Chem.</i> <b>2016</b> , <i>55</i> , 7688. [Mg(H <sub>2</sub> O) <sub>6</sub> ][NpO <sub>2</sub> (OOCCH <sub>2</sub> H <sub>5</sub> ) <sub>3</sub> ] <sub>2</sub>                           |
| EMEZAX   | 2.046 Å | Dale, S. H.; Elsegood, M. R. J.; Kainth, S. <i>Acta Crystallogr., Sect. E</i> <b>2003</b> , <i>59</i> , m505. [Mg(H <sub>2</sub> O) <sub>6</sub> ]C <sub>10</sub> H <sub>4</sub> O <sub>8</sub>                                                                                                                  |
| UNUBAI   | 2.046 Å | Dhavskar, K. T.; Bhargao, P. H.; Srinivasan, B. R. <i>J. Chem. Sci. (Bangalore)</i> <b>2016</b> , <i>128</i> , 421. [Mg(H <sub>2</sub> O) <sub>6</sub> ](p-CH <sub>3</sub> OC <sub>6</sub> H <sub>4</sub> CH <sub>2</sub> COO) <sub>2</sub> ·2H <sub>2</sub> O                                                   |
| 131994   | 2.047 Å | Rincke, C.; Schmidt, H.; Voigt, W. <i>Acta Crystallogr., Sect. C</i> <b>2020</b> , <i>76</i> , 244. KCl·[Mg(H <sub>2</sub> O) <sub>6</sub> ]Cl                                                                                                                                                                   |
| MODFAN   | 2.047 Å | Jeremic, D.; Kaluderovic, G. N.; Brceski, I.; Gomez-Ruiz, S.; Anđelkovic, K. K. <i>Acta Crystallogr., Sect. E</i> <b>2008</b> , <i>64</i> , m952. [Mg(H <sub>2</sub> O) <sub>6</sub> ](C <sub>10</sub> H <sub>16</sub> O <sub>4</sub> S) <sub>2</sub>                                                            |
| 252875   | 2.048 Å | Serezhkin, V. N.; Grigoriev, M. S.; Abdulmyanov, A. R.; Fedoseev, A.M.; Savchenkov, A. V.; Serezhkina, L. B. <i>Inorg. Chem.</i> <b>2016</b> , <i>55</i> , 7688. [Mg(H <sub>2</sub> O) <sub>6</sub> ][PuO <sub>2</sub> (C <sub>2</sub> H <sub>5</sub> COO) <sub>3</sub> ] <sub>2</sub>                           |
| ASUPAH   | 2.048 Å | Serezhkin, V. N.; Grigoriev, M. S.; Abdulmyanov, A.R.; Fedoseev, A.M.; Savchenkov, A. V.; Serezhkina, L. B. <i>Inorg. Chem.</i> <b>2016</b> , <i>55</i> , 7688. [Mg(H <sub>2</sub> O) <sub>6</sub> ][PuO <sub>2</sub> (OOCCH <sub>2</sub> H <sub>5</sub> ) <sub>3</sub> ] <sub>2</sub>                           |
| TIZRIG01 | 2.048 Å | Didelot, E.; Sadikin, Y.; Lodziana, Z.; Cerny, R. <i>Solid State Sci.</i> <b>2019</b> , <i>90</i> , 86. [Mg(H <sub>2</sub> O) <sub>6</sub> ]B <sub>12</sub> H <sub>12</sub>                                                                                                                                      |

|        |         |                                                                                                                                                                                                                                                                                                                    |
|--------|---------|--------------------------------------------------------------------------------------------------------------------------------------------------------------------------------------------------------------------------------------------------------------------------------------------------------------------|
| CIRVAA | 2.049 Å | Gupta, M. P.; Van Alsenoy, C.; Lenstra, A. T. H. <i>Acta Crystallogr. Sect. C</i> <b>1984</b> , <i>40</i> , 1526.<br>[Mg((H <sub>2</sub> O) <sub>6</sub> )(HOOCCHCHCOO) <sub>2</sub>                                                                                                                               |
| ORAQOP | 2.049 Å | Xu, X.; Hu, F.; Yan, S.; Lin, J.; Li, Q.; Shuai, Q. <i>RSC Advances</i> <b>2016</b> , <i>6</i> , 67610.<br>[Mg(H <sub>2</sub> O) <sub>6</sub> ](C <sub>9</sub> H <sub>8</sub> ClO <sub>3</sub> ) <sub>2</sub>                                                                                                      |
| XAXHIP | 2.049 Å | Wei, M.; Li, H.; Wang, X. <i>J. Cluster Sci.</i> <b>2012</b> , <i>23</i> , 325. H <sub>3</sub> O[Mg(H <sub>2</sub> O) <sub>6</sub> ][Mo <sub>12</sub> O <sub>40</sub> P]·4(4-C <sub>5</sub> H <sub>4</sub> NHCOOH)·3.5H <sub>2</sub> O                                                                             |
| 1834   | 2.050 Å | Black, W. H.; Griffith, E. A. H.; Robertson, B. E. <i>Acta Crystallogr., Sect. B</i> <b>1975</b> , <i>31</i> , 615-617.<br>[Mg(H <sub>2</sub> O) <sub>6</sub> ]S <sub>2</sub> O <sub>6</sub>                                                                                                                       |
| 29557  | 2.050 Å | Mereiter, K. <i>Neues Jahrbuch für Mineralogie. Monatshefte</i> <b>1986</b> , 481-492.<br>Ca[Mg(H <sub>2</sub> O) <sub>6</sub> ](UO <sub>2</sub> (CO <sub>3</sub> ) <sub>3</sub> )·6H <sub>2</sub> O                                                                                                               |
| FURWIZ | 2.050 Å | Leong, W. L.; Vittal, J. J. <i>Inorg. Chim. Acta</i> <b>2009</b> , <i>362</i> , 2189. [Mg(H <sub>2</sub> O) <sub>6</sub> ][MgC <sub>30</sub> H <sub>28</sub> N <sub>2</sub> O <sub>16</sub> ]·2CH <sub>3</sub> CN                                                                                                  |
| OROFEI | 2.050 Å | Brady, M.; Piombo, S. D.; Hu, C.; Buccella, D. <i>Dalton Trans.</i> <b>2016</b> , <i>45</i> , 12458<br>[Mg(H <sub>2</sub> O) <sub>6</sub> ][MgC <sub>12</sub> H <sub>10</sub> NO <sub>7</sub> ]·C <sub>4</sub> H <sub>8</sub> O <sub>2</sub> ·6H <sub>2</sub> O                                                    |
| TIZTIG | 2.050 Å | Antsyshkina, A. S.; Sadikov, G. G.; Sergienko, V. S.; Poznyak, A. L. <i>Zh. Neorg. Khim.</i> <b>2007</b> , <i>52</i> , 566.<br>[Mg(H <sub>2</sub> O) <sub>6</sub> ][VOCl <sub>10</sub> H <sub>12</sub> N <sub>2</sub> O <sub>8</sub> ] <sub>2</sub> ·3.5H <sub>2</sub> O                                           |
| WANKUT | 2.050 Å | Rajbanshi, A.; Custelcean, R. <i>Supramol. Chem.</i> <b>2012</b> , <i>24</i> , 65. [Mg(H <sub>2</sub> O) <sub>6</sub> ]CrO <sub>4</sub> ·2C <sub>24</sub> H <sub>30</sub> N <sub>10</sub> O <sub>3</sub>                                                                                                           |
| 32507  | 2.051 Å | Thomas, R.; Moore, F. H. <i>Acta Crystallogr. Sect. B</i> <b>1981</b> , <i>37</i> , 2153-2155. [Mg(H <sub>2</sub> O) <sub>6</sub> ]I <sub>8</sub>                                                                                                                                                                  |
| 248632 | 2.051 Å | Chen, X.; Li, Y.-H.; Alexander, A.-M.; Gallucci, J. C.; Hwang, S.-J.; Lingam, H. K.; Huang, Z.; Wang, C.; Li, H.; Zhao, Q.; Ozkan, U. S.; Shore, S. G.; Zhao, J.-C. <i>Chem. Eur. J.</i> <b>2014</b> , <i>20</i> , 7325.<br>[Mg(H <sub>2</sub> O) <sub>6</sub> ]B <sub>12</sub> H <sub>12</sub> ·6H <sub>2</sub> O |
| HAZZIT | 2.051 Å | Chang, L.-M.; Zhao, X.; Gu, Z.-G.; Liu, W.-J.; Wei, Z.-Q.; Liu, Y.-L.; Mo, H.-H.; Yue, S.-T. <i>Z. Anorg. Allg. Chem.</i> <b>2012</b> , <i>638</i> , 652. [Mg(H <sub>2</sub> O) <sub>6</sub> ][EuMgC <sub>12</sub> H <sub>12</sub> O <sub>15</sub> ] <sub>2</sub> ·6H <sub>2</sub> O                               |
| YOCGAA | 2.051 Å | Savchenkov, A. V.; Vologzhanina, A. V.; Serezhkin, V. N.; Pushkin, D. V.; Serezhkina, L. B. <i>Kristallografiya</i> <b>2014</b> , <i>59</i> , 235. [Mg(H <sub>2</sub> O) <sub>6</sub> ][UO <sub>2</sub> C <sub>12</sub> H <sub>21</sub> O <sub>6</sub> ]                                                           |
| AYIPII | 2.052 Å | Smith, G.; Wermuth, U. D.; Williams, M. L. <i>Acta Crystallogr., Sect. E</i> <b>2011</b> , <i>67</i> , 1194.<br>[Mg(H <sub>2</sub> O) <sub>6</sub> ](C <sub>7</sub> H <sub>5</sub> O <sub>6</sub> S) <sub>2</sub> ·2H <sub>2</sub> O                                                                               |
| CABCAN | 2.052 Å | Gardner, H. C.; Kennedy, A. R.; McCarney, K. M.; Staunton, E.; Stewart, H.; Teat, S. J. <i>Acta Crystallogr. Sect. C</i> <b>2020</b> , <i>76</i> , 972. [Mg(H <sub>2</sub> O) <sub>6</sub> ](C <sub>12</sub> H <sub>10</sub> N <sub>3</sub> O <sub>6</sub> S <sub>2</sub> ) <sub>2</sub> ·8H <sub>2</sub> O        |
| ENEFOT | 2.052 Å | Guner, F. E. G.; Lutz, M.; Sakurai, T.; Spek, A. L.; Hondoh, T. <i>Cryst. Growth Des.</i> <b>2010</b> , <i>10</i> , 4327.<br>[Mg(H <sub>2</sub> O) <sub>6</sub> ](CH <sub>3</sub> SO <sub>3</sub> ) <sub>2</sub> ·6H <sub>2</sub> O                                                                                |
| IVOTET | 2.052 Å | Kose, D. A.; Zumreoglu-Karan, B.; Hokelek, T. <i>Inorg. Chim. Acta</i> <b>2011</b> , <i>375</i> , 236.<br>[Mg(H <sub>2</sub> O) <sub>6</sub> ]Cl <sub>2</sub> ·(C <sub>14</sub> H <sub>8</sub> BO <sub>6</sub> ) <sub>2</sub> ·4H <sub>2</sub> O                                                                   |
| IYAGEW | 2.052 Å | Zhang, Y. CCDC deposition number, 1509632, <b>2016</b> . [Mg(H <sub>2</sub> O) <sub>6</sub> ][C <sub>4</sub> H <sub>2</sub> N <sub>11</sub> ] <sub>2</sub> ·6H <sub>2</sub> O                                                                                                                                      |

|          |         |                                                                                                                                                                                                                                                                        |
|----------|---------|------------------------------------------------------------------------------------------------------------------------------------------------------------------------------------------------------------------------------------------------------------------------|
| MOYTAV   | 2.052 Å | Baier, J.; Thewalt, U. <i>Z. Anorg. Allg. Chem.</i> <b>2002</b> , 628, 1890. [Mg(H <sub>2</sub> O) <sub>6</sub> ][OOC <sub>6</sub> COOH] <sub>2</sub> ·2H <sub>2</sub> O                                                                                               |
| OHUCEZ   | 2.052 Å | Zhou, Z.-H.; Deng, Y.-F.; Jiang, Y.-Q.; Wan, H.-L.; Ng, S. W. <i>Dalton Trans.</i> <b>2003</b> , 2636.<br>K <sub>2</sub> [Mg(H <sub>2</sub> O) <sub>6</sub> ][TiC <sub>18</sub> H <sub>18</sub> O <sub>21</sub> ] <sub>2</sub> ·6H <sub>2</sub> O                      |
| RARYUG   | 2.052 Å | Saha, D.; Maity, T.; Dey, T.; Koner, S. <i>Polyhedron</i> <b>2012</b> , 35, 55. [Mg(H <sub>2</sub> O) <sub>6</sub> ][CuC <sub>14</sub> H <sub>6</sub> N <sub>2</sub> O <sub>8</sub> ]·2H <sub>2</sub> O                                                                |
| THIAMG10 | 2.052 Å | Blank, G.; Rodrigues, M.; Pletcher, J.; Sax, M. <i>Acta Crystallogr., Sect. B</i> <b>1976</b> , 32, 2970.<br>[Mg(H <sub>2</sub> O) <sub>6</sub> ](C <sub>12</sub> H <sub>18</sub> N <sub>4</sub> OS) <sub>2</sub> Cl <sub>6</sub> ·4H <sub>2</sub> O                   |
| UWESIB   | 2.052 Å | Xie, L.; Bai, H.; Song, L.; Liu, C.; Gong, W.; Wang, W.; Zhao, X.; Takemoto, C.; Wang, H. <i>Inorg. Chem.</i> <b>2021</b> , 60, 8826. [Mg(H <sub>2</sub> O) <sub>6</sub> ][RuCl <sub>3</sub> (NO)(C <sub>9</sub> H <sub>5</sub> ClNO)] <sub>2</sub> ·3H <sub>2</sub> O |
| YIDVIR   | 2.052 Å | Wang, L.-H.; Yin, J.; Tai, X.-S. <i>Acta Crystallogr., Sect. E</i> <b>2007</b> , 63, m1664. [Mg(H <sub>2</sub> O) <sub>6</sub> ](C <sub>13</sub> H <sub>10</sub> NO <sub>4</sub> S) <sub>2</sub>                                                                       |
| WELQIQ   | 2.052 Å | Liao, J.-Z.; Wang, S.-S.; Wu, X.-Y.; Yu, R.; Lu, C.-Z.; Chen, X.-L. <i>Dalton Trans.</i> <b>2018</b> , 47, 1027.<br>[Mg((H <sub>2</sub> O) <sub>6</sub> )(C <sub>18</sub> H <sub>12</sub> N <sub>2</sub> O <sub>10</sub> S <sub>2</sub> )                              |
| ZURWIS   | 2.052 Å | Haas, A.; Klare, C.; Betz, P.; Bruckmann, J.; Kruger, C.; Tsay, Y.-H.; Aubke, F. <i>Inorg. Chem.</i> <b>1996</b> , 35, 1918. [Mg((H <sub>2</sub> O) <sub>6</sub> )(N(SO <sub>2</sub> CF <sub>3</sub> ) <sub>2</sub> ) <sub>2</sub> ·2H <sub>2</sub> O                  |
| 35627    | 2.053 Å | Solans, X.; Font-Altaba, M.; Aguilo, M.; Solans, J.; Domenech, M. V. <i>Acta Crystallogr., Sect. C</i> <b>1983</b> , 39, 1488-1490. NH <sub>4</sub> [Mg(H <sub>2</sub> O) <sub>6</sub> ]Cl <sub>3</sub>                                                                |
| 163021   | 2.053 Å | Lixin, Y.; DesMarteau, D. D.; Pennington, W. T. <i>Solid State Sci.</i> <b>2005</b> , 7, 311.<br>[Mg(H <sub>2</sub> O) <sub>6</sub> ](CF <sub>3</sub> SO <sub>2</sub> ) <sub>2</sub> N <sub>2</sub> ·2H <sub>2</sub> O                                                 |
| 760215   | 2.053 Å | Lacrox, M. R.; Bukovsky, E. V.; Lozinšek, M.; Folsom, T. C.; Newell, B. S.; Liu, Y. Peryshkov, D. V.; Strauss, S. H. <i>Inorg. Chem.</i> <b>2018</b> , 57, 14893. [Mg(H <sub>2</sub> O) <sub>6</sub> ]B <sub>12</sub> F <sub>12</sub>                                  |
| GIJVEA   | 2.053 Å | Meyer, H.-J.; Pickardt, J. <i>Z. Anorg. Allg. Chem.</i> <b>1988</b> , 560, 185. [Mg((H <sub>2</sub> O) <sub>6</sub> )(C <sub>6</sub> H <sub>13</sub> N <sub>4</sub> ) <sub>2</sub> ][Fe(CN) <sub>6</sub> ]                                                             |
| HAHWAO   | 2.053 Å | Graf, M.; Stoekli-Evans, H.; Whitaker, C.; Marioni, P.-A.; Marty, W. <i>Chimia</i> <b>1993</b> , 47, 202.<br>[Mg((H <sub>2</sub> O) <sub>6</sub> )[CuC <sub>8</sub> H <sub>4</sub> N <sub>2</sub> O <sub>10</sub> ]·2H <sub>2</sub> O                                  |
| NEPGAT   | 2.053 Å | Novikov, S. A.; Serezhkina, L. B.; Grigoriev, M. S.; Serezhkin, V. N. <i>Polyhedron</i> <b>2018</b> , 141, 147.<br>[Mg((H <sub>2</sub> O) <sub>6</sub> )[UO <sub>2</sub> (C <sub>10</sub> H <sub>13</sub> O <sub>8</sub> )]·3H <sub>2</sub> O                          |
| NIKKOK   | 2.053 Å | Gacki, M. CCDC deposition number 1869947, <b>2018</b> . [Mg((H <sub>2</sub> O) <sub>6</sub> )(C <sub>7</sub> H <sub>7</sub> N <sub>4</sub> O <sub>2</sub> ) <sub>2</sub> ·2(C <sub>7</sub> H <sub>8</sub> N <sub>4</sub> O <sub>2</sub> )·2H <sub>2</sub> O            |
| OHUCID   | 2.053 Å | Zhou, Z.-H.; Deng, Y.-F.; Jiang, Y.-Q.; Wan, H.-L.; Ng, S. W. <i>Dalton Trans.</i> <b>2003</b> , 2636. .<br>(NH <sub>4</sub> ) <sub>2</sub> [Mg(H <sub>2</sub> O) <sub>6</sub> ][TiC <sub>18</sub> H <sub>18</sub> O <sub>21</sub> ] <sub>2</sub> ·6H <sub>2</sub> O   |
| PICDUC   | 2.053 Å | Klepov, V. V.; Peresyphkina, E. V.; Serezhkina, L. B.; Karasev, M. O.; Virovets, A. V.; Serezhkin, V. N. <i>Polyhedron</i> <b>2013</b> , 61, 137. [Mg(H <sub>2</sub> O) <sub>6</sub> ][UO <sub>2</sub> (OOCH <sub>3</sub> ) <sub>3</sub> ] <sub>2</sub>                |
| POHGIC   | 2.053 Å | Jin-Ling, W.; Bo, L.; Fang-Ming, M. <i>Chinese J. Struct. Chem.</i> <b>1994</b> , 13, 304.<br>[Mg((H <sub>2</sub> O) <sub>6</sub> )[C <sub>10</sub> H <sub>8</sub> NO <sub>3</sub> S]·6H <sub>2</sub> O                                                                |
| PONGIJ   | 2.053 Å | Rheingold, A. L. CCDC deposition number 705780, <b>2008</b> . [Mg(H <sub>2</sub> O) <sub>6</sub> ](C <sub>12</sub> H <sub>21</sub> O <sub>4</sub> ) <sub>2</sub> ·H <sub>2</sub> O                                                                                     |

|          |         |                                                                                                                                                                                                                                                                                                        |
|----------|---------|--------------------------------------------------------------------------------------------------------------------------------------------------------------------------------------------------------------------------------------------------------------------------------------------------------|
| YIRWAA   | 2.053 Å | Lacroix, M. R.; Bukovsky, E. V.; Lozinsek, M.; Folsom, T. C.; Newell, B. S.; Liu, Y.; Peryshkov, D. V.; Strauss, S. H. <i>Inorg. Chem.</i> <b>2018</b> , <i>57</i> , 14983. [Mg((H <sub>2</sub> O) <sub>6</sub> )B <sub>12</sub> F <sub>12</sub>                                                       |
| VAFKET   | 2.053 Å | Dalrymple, S. A.; Parvez, M.; Shimizu, G. K. H. <i>Inorg. Chem.</i> <b>2002</b> , <i>41</i> , 6986. [Mg((H <sub>2</sub> O) <sub>6</sub> ) <sub>3</sub> [C <sub>9</sub> H <sub>9</sub> O <sub>9</sub> S <sub>3</sub> ) <sub>2</sub>                                                                     |
| ZURWIS02 | 2.053 Å | Veryasov, G.; Harinaga, U.; Matsumoto, K.; Hagiwara, R. <i>Eur. J. Inorg. Chem.</i> <b>2017</b> , 1087. [Mg(H <sub>2</sub> O) <sub>6</sub> ]((CF <sub>3</sub> SO <sub>2</sub> ) <sub>2</sub> N) <sub>2</sub> ·2H <sub>2</sub> O                                                                        |
| 29558    | 2.054 Å | Mereiter, K. <i>Neues Jahrbuch für Mineralogie. Monatshefte</i> <b>1986</b> , 481. Sr[Mg(H <sub>2</sub> O) <sub>6</sub> ](UO <sub>2</sub> (CO <sub>3</sub> ) <sub>3</sub> )·6H <sub>2</sub> O                                                                                                          |
| 281355   | 2.054 Å | Kuratieva, N. V.; Naumova, M. I.; Naumov, D. Y.; Podberezskaya, N.V. <i>Acta Crystallogr., Sect. E</i> <b>2003</b> , <i>59</i> , i89. [Mg(H <sub>2</sub> O) <sub>6</sub> ](H <sub>2</sub> PO <sub>4</sub> ) <sub>2</sub>                                                                               |
| GIYCAT   | 2.054 Å | Custelcean, R.; Remy, P.; Bonnesen, P. V.; Jiang, D.-E.; Moyer, B. A. <i>Angew. Chem., Int. Ed.</i> <b>2008</b> , <i>47</i> , 1866. [Mg(H <sub>2</sub> O) <sub>6</sub> ]SO <sub>4</sub> ·2C <sub>24</sub> H <sub>30</sub> N <sub>10</sub> O <sub>3</sub>                                               |
| GIYCEX   | 2.054 Å | Custelcean, R.; Remy, P.; Bonnesen, P. V.; Jiang, D.-E.; Moyer, B. A. <i>Angew. Chem., Int. Ed.</i> <b>2008</b> , <i>47</i> , 1866. [Mg(H <sub>2</sub> O) <sub>6</sub> ]SO <sub>3</sub> ·2C <sub>24</sub> H <sub>30</sub> N <sub>10</sub> O <sub>3</sub>                                               |
| GIYCIB   | 2.054 Å | Custelcean, R.; Remy, P.; Bonnesen, P. V.; Jiang, D.-E.; Moyer, B. A. <i>Angew. Chem., Int. Ed.</i> <b>2008</b> , <i>47</i> , 1866. [Mg(H <sub>2</sub> O) <sub>6</sub> ]CO <sub>3</sub> ·2C <sub>24</sub> H <sub>30</sub> N <sub>10</sub> O <sub>3</sub>                                               |
| GIYCOH   | 2.054 Å | Custelcean, R.; Remy, P.; Bonnesen, P. V.; Jiang, D.-E.; Moyer, B. A. <i>Angew. Chem., Int. Ed.</i> <b>2008</b> , <i>47</i> , 1866. [Mg(H <sub>2</sub> O) <sub>6</sub> ]SeO <sub>4</sub> ·2C <sub>24</sub> H <sub>30</sub> N <sub>10</sub> O <sub>3</sub>                                              |
| IBEMIM   | 2.054 Å | Seifullina, I. I.; Martsinko, E. E.; Aleksandrov, G. G.; Sergienko, V. S. <i>Zh. Neorg. Khim.</i> <b>2004</b> , <i>49</i> , 928. [Mg(H <sub>2</sub> O) <sub>6</sub> ] <sub>2</sub> [Ge <sub>6</sub> C <sub>12</sub> H <sub>32</sub> O <sub>48</sub> P <sub>12</sub> ) <sub>2</sub> ·28H <sub>2</sub> O |
| KOZXOP   | 2.054 Å | Liu T.; Wang J.; Chen L.; Cao D.; Lu, Z.; Wu, N. Z. <i>Kristallogr. – New Cryst. Struct.</i> <b>2019</b> , <i>234</i> , 933. [Mg(H <sub>2</sub> O) <sub>6</sub> ](C <sub>3</sub> HN <sub>4</sub> O <sub>4</sub> ) <sub>2</sub>                                                                         |
| MOYTAV01 | 2.054 Å | Yang, L.; Foxman, B. M. CCDC deposition number 2106594, <b>2021</b> . [Mg(H <sub>2</sub> O) <sub>6</sub> ](OCCCCOOH) <sub>2</sub> ·2H <sub>2</sub> O                                                                                                                                                   |
| MUCTEM   | 2.054 Å | Singh, R.; Kociok-Kohn, G.; Jassal, A. K.; Singh, L. <i>Polyhedron</i> <b>2019</b> , <i>175</i> , 114200. [Mg((H <sub>2</sub> O) <sub>6</sub> )(C <sub>2</sub> H <sub>5</sub> SO <sub>3</sub> ) <sub>2</sub>                                                                                           |
| YIKKUA   | 2.054 Å | Hennings, E.; Schmidt, H.; Voigt, W. <i>Acta Crystallogr., Sect. C</i> <b>2013</b> , <i>69</i> , 1292. [Mg(H <sub>2</sub> O) <sub>6</sub> ] <sub>12</sub> ·2H <sub>2</sub> O                                                                                                                           |
| DAQMIT   | 2.055 Å | Sabate, C.M.; Jeanneau, E.; Delalu, H. <i>Dalton Trans.</i> <b>2012</b> , <i>41</i> , 3817. [Mg(H <sub>2</sub> O) <sub>6</sub> ](C <sub>4</sub> N <sub>5</sub> ) <sub>2</sub> ·2H <sub>2</sub> O                                                                                                       |
| DOFXIG   | 2.055 Å | Zhou, Q.-P.; Zha, G.-F.; She, J.-B. <i>J. Coord. Chem.</i> <b>2008</b> , <i>61</i> , 2601. [Mg(H <sub>2</sub> O) <sub>6</sub> ](C <sub>3</sub> H <sub>2</sub> N <sub>3</sub> O <sub>5</sub> )                                                                                                          |
| HAZZOZ   | 2.055 Å | Chang, L.-M.; Zhao, X.; Gu, Z.-G.; Liu, W.-J.; Wei, Z.-Q.; Liu, Y.-L.; Mo, H.-H.; Yue, S.-T. <i>Z. Anorg. Allg. Chem.</i> <b>2012</b> , <i>638</i> , 652. [Mg(H <sub>2</sub> O) <sub>6</sub> ][MgTbC <sub>12</sub> H <sub>12</sub> O <sub>15</sub> ] <sub>2</sub> ·6H <sub>2</sub> O                   |
| KESVEL   | 2.055 Å | Kruszynski, R.; Sieranski, T. <i>J. Coord. Chem.</i> <b>2013</b> , <i>66</i> , 42. [Mg(H <sub>2</sub> O) <sub>6</sub> ](NO <sub>3</sub> ) <sub>2</sub> ·2C <sub>6</sub> H <sub>12</sub> N <sub>4</sub> ·2H <sub>2</sub> O                                                                              |
| LUZZUC   | 2.055 Å | Xi-Shi Tai, X.-S.; Wang, D.-F.; Zhao, Z.-B. <i>Chin. J. Inorg. Chem.</i> <b>2010</b> , <i>26</i> , 1490. [Mg(H <sub>2</sub> O) <sub>6</sub> ](C <sub>9</sub> H <sub>8</sub> N <sub>3</sub> O <sub>2</sub> S) <sub>2</sub>                                                                              |



|          |         |                                                                                                                                                                                                                                                                                                          |
|----------|---------|----------------------------------------------------------------------------------------------------------------------------------------------------------------------------------------------------------------------------------------------------------------------------------------------------------|
| MISXER   | 2.055 Å | Wiesbrock, F.; Nogai, S.; Schier, A.; Schmidbaur, H. <i>Helv. Chim. Acta</i> <b>2002</b> , <i>85</i> , 1151.<br>[Mg((H <sub>2</sub> O) <sub>6</sub> )] [C <sub>5</sub> H <sub>8</sub> NO <sub>4</sub> ] <sub>2</sub>                                                                                     |
| RIHFV    | 2.055 Å | Astbury, C.; Conway, L. K.; Gillespie, C.; Hodge, K.; Innes, E.; Kennedy, A. R. <i>Dyes Pigm.</i> <b>2013</b> , <i>97</i> , 100. [Mg(H <sub>2</sub> O) <sub>6</sub> ](C <sub>15</sub> H <sub>13</sub> N <sub>4</sub> O <sub>3</sub> S) <sub>2</sub> ·6H <sub>2</sub> O                                   |
| TEKBIU   | 2.055 Å | Turel, I.; Leban, I.; Zupancic, M.; Bukovec, P.; Gruber, K. <i>Acta Crystallogr., Sect. C</i> <b>1996</b> , <i>52</i> , 2443.<br>[Mg((H <sub>2</sub> O) <sub>6</sub> )](C <sub>17</sub> H <sub>19</sub> FN <sub>3</sub> O <sub>3</sub> ) <sub>2</sub> (SO <sub>4</sub> ) <sub>2</sub> ·6H <sub>2</sub> O |
| TUGGEJ   | 2.055 Å | Cui, Z.-H.; Sun, J.-H.; Jia, Y.-Z.; Chen, Y.-M.; Jiang, X.-P. <i>Synth. React. Inorg., Met.-Org., Nano-Met. Chem.</i> <b>2015</b> , <i>45</i> , 1004. [Mg(H <sub>2</sub> O) <sub>6</sub> ]Cl <sub>2</sub> ·2(HO(CH <sub>2</sub> ) <sub>2</sub> OH)                                                       |
| 1317     | 2.056 Å | Anderson, M. R.; Jenkin, G. T.; White, J. W. <i>Acta Crystallogr., Sect. B</i> <b>1977</b> , <i>33</i> , 3933-3936.<br>La <sub>2</sub> [Mg(H <sub>2</sub> O) <sub>6</sub> ] <sub>3</sub> (NO <sub>3</sub> ) <sub>12</sub> ·6H <sub>2</sub> O                                                             |
| 40972    | 2.056 Å | Duhlev, R.; Faggiani, R.; Brown, I. D. <i>Acta Crystallogr., Sect. C</i> <b>1987</b> , <i>43</i> , 2046-2048.<br>Cd[Mg(H <sub>2</sub> O) <sub>6</sub> ] <sub>2</sub> Br <sub>6</sub>                                                                                                                     |
| 49915    | 2.056 Å | Duhlev, R.; Faggiani, R.; Brown, I. D. <i>Acta Crystallogr., Sect. C</i> <b>1987</b> , <i>43</i> , 2044-2046.<br>Cd[Mg(H <sub>2</sub> O) <sub>6</sub> ] <sub>2</sub> Br <sub>6</sub>                                                                                                                     |
| 166057   | 2.056 Å | Parafiniuk, J.; Dobrzycki, L.; Wozniak, K. <i>Am. Miner.</i> <b>2010</b> , <i>95</i> , 11.<br>(H <sub>3</sub> O) <sub>3</sub> [Mg(H <sub>2</sub> O) <sub>6</sub> ]Fe <sub>15</sub> (SO <sub>4</sub> ) <sub>21</sub> (OH) <sub>18</sub> ·62H <sub>2</sub> O                                               |
| 416173   | 2.056 Å | Kremenovic, A.; Poleti, D.; Ghermani, N. E.; Karanovic, L.; Mioc, U. B.; Nedic, Z.; Spasojevic-de Bire, A. <i>Cryst. Res. Technol.</i> <b>2007</b> , <i>42</i> , 98. [Mg(H <sub>2</sub> O) <sub>6</sub> ][HPW <sub>12</sub> O <sub>40</sub> ] <sub>4</sub> ·4H <sub>2</sub> O                            |
| BADTEX10 | 2.056 Å | Dubler, E.; Jameson, G. B.; Kopajtic, Z. <i>J. Inorg. Biochem.</i> <b>1986</b> , <i>26</i> , 1. [Mg((H <sub>2</sub> O) <sub>6</sub> )](C <sub>5</sub> H <sub>3</sub> N <sub>4</sub> O <sub>3</sub> ) <sub>2</sub> ·2H <sub>2</sub> O                                                                     |
| CIPGIS   | 2.056 Å | Wadepohl, H. CCDC deposition number 660994, <b>2007</b> .<br>[Mg(H <sub>2</sub> O) <sub>6</sub> ][Mg(H <sub>2</sub> O) <sub>4</sub> (O(CH <sub>3</sub> ) <sub>2</sub> ) <sub>2</sub> ](B(C <sub>6</sub> H <sub>5</sub> ) <sub>4</sub> ) <sub>4</sub> ·C <sub>6</sub> H <sub>5</sub> CH <sub>3</sub>      |
| HAZZUF   | 2.056 Å | Chang, L.-M.; Zhao, X.; Gu, Z.-G.; Liu, W.-J.; Wei, Z.-Q.; Liu, Y.-L.; Mo, H.-H.; Yue, S.-T. <i>Z. Anorg. Allg. Chem.</i> <b>2012</b> , <i>638</i> , 652. [Mg(H <sub>2</sub> O) <sub>6</sub> ][GdMgC <sub>12</sub> H <sub>12</sub> O <sub>15</sub> ] <sub>2</sub> ·6H <sub>2</sub> O                     |
| KOZXOP01 | 2.056 Å | Wenli Cao, W.; Wang, T.; Mei, H.; Dong, W.; Tariq, Q.; Yin, L.; Li, Z.; Zhang, J.-G. <i>ACS Appl. Mater. Interfaces</i> <b>2022</b> , <i>14</i> , 32084. [Mg(H <sub>2</sub> O) <sub>6</sub> ](C <sub>3</sub> HN <sub>4</sub> O <sub>4</sub> ) <sub>2</sub>                                               |
| NOGLAW   | 2.056 Å | Simonsen, O. <i>Acta Chem. Scand.</i> <b>1997</b> , <i>51</i> , 861. [Mg((H <sub>2</sub> O) <sub>6</sub> )](C <sub>4</sub> H <sub>2</sub> N <sub>3</sub> O <sub>5</sub> ) <sub>2</sub> ·2H <sub>2</sub> O                                                                                                |
| OKOKUV   | 2.056 Å | Custelcean, R.; Bock, A.; Moyer, B. A. <i>J. Am. Chem. Soc.</i> <b>2010</b> , <i>132</i> , 7177.<br>[Mg(H <sub>2</sub> O) <sub>6</sub> ](C <sub>24</sub> H <sub>30</sub> N <sub>10</sub> O <sub>3</sub> ) <sub>2</sub> (SO <sub>4</sub> ) <sub>0.52</sub> (SeO <sub>4</sub> ) <sub>0.48</sub>            |
| QAWXEU   | 2.056 Å | He, P.; Zhang, J.-G.; Wu, L.; Wu, J.-T.; Zhang, T.-L. <i>Z. Anorg. Allg. Chem.</i> <b>2017</b> , <i>643</i> , 432.<br>[Mg(H <sub>2</sub> O) <sub>6</sub> ](C <sub>2</sub> N <sub>10</sub> O <sub>2</sub> )·2H <sub>2</sub> O                                                                             |
| WABFOW01 | 2.056 Å | Islam, S.; Tripathi, S.; Hossain, A.; Seth, S. K.; Mukhopadhyay, S. <i>J. Mol. Struct.</i> <b>2022</b> , <i>1265</i> , 133373.<br>[Mg(H <sub>2</sub> O) <sub>6</sub> ](C <sub>7</sub> H <sub>4</sub> NO <sub>4</sub> ) <sub>2</sub>                                                                      |

|          |         |                                                                                                                                                                                                                                                                                                                                  |
|----------|---------|----------------------------------------------------------------------------------------------------------------------------------------------------------------------------------------------------------------------------------------------------------------------------------------------------------------------------------|
| WITMUJ   | 2.056 Å | Zhang, R.; Zhao, Y.; Wang, J.; Ji, L.; Yang, X.-J.; Wu, B. <i>Cryst. Growth Des.</i> <b>2014</b> , <i>14</i> , 544. [Mg(H <sub>2</sub> O) <sub>6</sub> ]Cl <sub>2</sub> ·2(C <sub>24</sub> H <sub>30</sub> N <sub>10</sub> O <sub>3</sub> )                                                                                      |
| YIKKOU   | 2.056 Å | Hennings, E.; Schmidt, H.; Voigt, W. <i>Acta Crystallogr., Sect. C</i> <b>2013</b> , <i>69</i> , 1292. [Mg(H <sub>2</sub> O) <sub>6</sub> ]Cl <sub>2</sub> ·2H <sub>2</sub> O                                                                                                                                                    |
| 16434    | 2.057 Å | Leclaire, A.; Borel, M. M.; Monier, J.-C. <i>Acta Crystallogr., Sect. B</i> <b>1980</b> , <i>36</i> , 2734-2735. Ca[Mg(H <sub>2</sub> O) <sub>6</sub> ] <sub>2</sub> Cl <sub>6</sub>                                                                                                                                             |
| 39126    | 2.057 Å | Nakayasu, M.; Suzukawa, Y.; Kobayashi, W. <i>Denki Kagaku Oyobi Kogyo Butsuri Kagaku</i> <b>1983</b> , <i>51</i> , 419-422. NH <sub>4</sub> [Mg(H <sub>2</sub> O) <sub>6</sub> ]Cl <sub>3</sub>                                                                                                                                  |
| BADTEX01 | 2.057 Å | Dubler, E.; Jameson, G. B.; Kopajtic, Z. <i>J. Inorg. Biochem.</i> <b>1986</b> , <i>26</i> , 1. [Mg((H <sub>2</sub> O) <sub>6</sub> )(C <sub>5</sub> H <sub>3</sub> N <sub>4</sub> O <sub>3</sub> ) <sub>2</sub> ·2H <sub>2</sub> O                                                                                              |
| DOFXAY   | 2.057 Å | Zhou, Q.-P.; Zha, G.-F.; She, J.-B. <i>J. Coord. Chem.</i> <b>2008</b> , <i>61</i> , 2601. [Mg(H <sub>2</sub> O) <sub>6</sub> ](C <sub>5</sub> H <sub>2</sub> N <sub>3</sub> O <sub>5</sub> ) <sub>2</sub> ·2H <sub>2</sub> O                                                                                                    |
| ECEBBUI  | 2.057 Å | Dokorou, V. N.; Milios, C. J.; Tsipis, A. C.; Haukka, M.; Weidler, P. G.; Powell, A. K.; Kostakis, G. E. <i>Dalton Trans.</i> <b>2012</b> , <i>41</i> , 12501. [Mg(H <sub>2</sub> O) <sub>6</sub> ](C <sub>6</sub> H <sub>10</sub> N <sub>2</sub> O <sub>6</sub> ) <sub>2</sub> ·5.5H <sub>2</sub> O                             |
| GOLPIG   | 2.057 Å | Castellari, C.; Comelli, F.; Ottani, S. <i>Acta Crystallogr. Sect. C</i> <b>1999</b> , <i>55</i> , 1054. [Mg((H <sub>2</sub> O) <sub>6</sub> )(C <sub>14</sub> H <sub>10</sub> Cl <sub>2</sub> NO <sub>2</sub> ) <sub>2</sub> ·2H <sub>2</sub> O                                                                                 |
| JEJTEY   | 2.057 Å | Zhang, Z.-T.; Wang, Q.-Y. <i>Heterocycles</i> <b>2005</b> , <i>65</i> , 1947. [Mg(H <sub>2</sub> O) <sub>6</sub> ](C <sub>19</sub> H <sub>17</sub> O <sub>7</sub> S) <sub>2</sub> ·8H <sub>2</sub> O                                                                                                                             |
| KEQRAZ   | 2.057 Å | Rychlewska, U.; Radanovic, D. D.; Jevtovic, V. S.; Radanovic, D. J. <i>Polyhedron</i> <b>2000</b> , <i>19</i> , 1. [Mg((H <sub>2</sub> O) <sub>6</sub> )[CuC <sub>11</sub> H <sub>14</sub> N <sub>2</sub> O <sub>8</sub> ]·2H <sub>2</sub> O                                                                                     |
| KUZJEU   | 2.057 Å | Rubtsova, T. B.; Kireeva, O. K.; Bulychev, B. M.; Streltsova, N. P.; Belsky, V. K.; Tarasov, B. P. <i>Polyhedron</i> <b>1992</b> , <i>11</i> , 1929. [Mg((H <sub>2</sub> O) <sub>6</sub> )[CuCl <sub>8</sub> (H <sub>2</sub> O) <sub>2</sub> ]·C <sub>10</sub> H <sub>20</sub> O <sub>5</sub> ·H <sub>2</sub> O                  |
| UNEVUE   | 2.057 Å | Dhungana, S.; White, P. S.; Crumbliss, A. L. <i>J. Am. Chem. Soc.</i> <b>2003</b> , <i>125</i> , 14760. [Mg(H <sub>2</sub> O) <sub>6</sub> ][FeC <sub>25</sub> H <sub>46</sub> N <sub>6</sub> O <sub>8</sub> ] <sub>2</sub> (ClO <sub>4</sub> ) <sub>4</sub> ·2C <sub>16</sub> H <sub>24</sub> O <sub>8</sub> ·9H <sub>2</sub> O |
| WIKXAP   | 2.057 Å | Ojala, W. H.; Lu, L. K.; Albers, K. E.; Gleason, W. B.; Richardson, T. I.; Lovrien, R. E.; Sudbeck, E. A. <i>Acta Crystallogr., Sect. B</i> <b>1994</b> , <i>50</i> , 684. [Mg((H <sub>2</sub> O) <sub>6</sub> )C <sub>16</sub> H <sub>16</sub> N <sub>2</sub> O <sub>7</sub> S <sub>2</sub>                                     |
| 15588    | 2.058 Å | Zalkin, A.; Forrester, J. D.; Templeton, D. H. <i>J. Chem. Phys.</i> <b>1963</b> , <i>39</i> , 2881-2891. Ce <sub>2</sub> [Mg(H <sub>2</sub> O) <sub>6</sub> ] <sub>3</sub> (NO <sub>3</sub> ) <sub>12</sub> ·6H <sub>2</sub> O                                                                                                  |
| AVOLAA   | 2.058 Å | Klepov, V. V.; Serezhkina, L. B.; Serezhkin, V. N.; Alekseev, E. V. <i>J. Solid State Chem.</i> <b>2016</b> , <i>244</i> , 100. [Mg(H <sub>2</sub> O) <sub>6</sub> ][Na(UO <sub>2</sub> (OOCCH <sub>3</sub> ) <sub>3</sub> ) <sub>3</sub> ]                                                                                      |
| BEKCID   | 2.058 Å | Simonsen O.; Hurup Mogelmoose, M.-L.; la Cour, A. <i>Acta Chem. Scand.</i> <b>1999</b> , <i>53</i> , 432. [Mg((H <sub>2</sub> O) <sub>6</sub> )(C <sub>8</sub> H <sub>9</sub> N <sub>2</sub> O <sub>3</sub> ) <sub>2</sub> ·4H <sub>2</sub> O                                                                                    |
| DUVNAL   | 2.058 Å | Klepov, V. V.; Serezhkina, L. B.; Pushkin, D. V.; Alekseev, E. V.; Grigor'ev, M. S.; Sergeeva, O. A.; Shimin, N. A.; Serezhkin, V. V. <i>J. Eur. Inorg. Chem.</i> <b>2016</b> , 118. [Mg(H <sub>2</sub> O) <sub>6</sub> ][Na(UO <sub>2</sub> (OOCCH <sub>2</sub> ) <sub>3</sub> ) <sub>3</sub> ]                                 |
| EKOYIO   | 2.058 Å | Bednarchuk, T. J.; Kinzhybalov, V.; Pietraszko, A. <i>Acta Crystallogr., Sect. C</i> <b>2016</b> , <i>72</i> , 432. [Mg(H <sub>2</sub> O) <sub>6</sub> ] <sub>3</sub> (2-C <sub>5</sub> H <sub>5</sub> N-NH <sub>2</sub> ) <sub>2</sub> (SO <sub>4</sub> ) <sub>4</sub> ·2H <sub>2</sub> O                                       |
| IJIVED   | 2.058 Å | Tai, X.-S. <i>Acta Crystallogr., Sect. E</i> <b>2011</b> , <i>67</i> , m132. [Mg(H <sub>2</sub> O) <sub>6</sub> ](C <sub>13</sub> H <sub>9</sub> BrNO <sub>4</sub> S) <sub>2</sub> ·2H <sub>2</sub> O                                                                                                                            |

|        |         |                                                                                                                                                                                                                                                                                                                                     |
|--------|---------|-------------------------------------------------------------------------------------------------------------------------------------------------------------------------------------------------------------------------------------------------------------------------------------------------------------------------------------|
| KURWOK | 2.058 Å | Xi-Shi Tai, X.-S.; Zhang, F.-G. <i>Acta Crystallogr., Sect. E</i> <b>2010</b> , <i>66</i> , m422. [Mg(H <sub>2</sub> O) <sub>6</sub> ](C <sub>16</sub> H <sub>16</sub> NO <sub>5</sub> S) <sub>2</sub>                                                                                                                              |
| NIJMEB | 2.058 Å | Assi, H.; Haouas, M.; Mouchaham, G.; Martineau-Corcoc, C.; Allain, C.; Clavier, G.; Guillou, N.; Serre, C.; Devic, T. <i>Polyhedron</i> <b>2018</b> , <i>156</i> , 111. [Mg((H <sub>2</sub> O) <sub>6</sub> )[Ti(C <sub>6</sub> H <sub>4</sub> O <sub>2</sub> ) <sub>3</sub> ]                                                      |
| OKOKOP | 2.058 Å | Custelcean, R.; Bock, A.; Moyer, B. A. <i>J. Am. Chem. Soc.</i> <b>2010</b> , <i>132</i> , 7177. [Mg(H <sub>2</sub> O) <sub>6</sub> ](C <sub>24</sub> H <sub>30</sub> N <sub>10</sub> O <sub>3</sub> ) <sub>2</sub> (SO <sub>4</sub> ) <sub>0.35</sub> (SeO <sub>4</sub> ) <sub>0.65</sub>                                          |
| RACBII | 2.058 Å | Fernando, I. R.; Daskalakis, N.; Demadis, K. D.; Mezei, G. <i>New J. Chem.</i> <b>2010</b> , <i>34</i> , 221. [Mg(H <sub>2</sub> O) <sub>6</sub> ](C <sub>3</sub> H <sub>3</sub> N <sub>2</sub> O <sub>3</sub> S) <sub>2</sub>                                                                                                      |
| ROXBEO | 2.058 Å | Park, G.; Oh, I.-H.; Park, S.-H. <i>Z. Kristallogr. – New Cryst. Struct.</i> <b>2020</b> , <i>235</i> , 85. [Mg((H <sub>2</sub> O) <sub>6</sub> )(O <sub>3</sub> SC <sub>6</sub> H <sub>4</sub> NNC <sub>6</sub> H <sub>4</sub> NCH <sub>3</sub> ) <sub>2</sub>                                                                     |
| TUXYOA | 2.058 Å | Zhang, J.-G.; Zhang, T.-L.; Yang, L.; Yu, K.-B. <i>Hanneng Cailiao Nagasaki Daigaku</i> <b>2001</b> , <i>9</i> , 179. [Mg((H <sub>2</sub> O) <sub>6</sub> )(C <sub>6</sub> H <sub>2</sub> N <sub>3</sub> O <sub>8</sub> ) <sub>2</sub> ·2H <sub>2</sub> O                                                                           |
| UMANOL | 2.058 Å | Dalrymple, S. A.; Shimizu, G. K. H. <i>Supramol. Chem.</i> <b>2003</b> , <i>15</i> , 591. [Mg(H <sub>2</sub> O) <sub>6</sub> ] <sub>3</sub> C <sub>6</sub> (CH <sub>2</sub> SO <sub>3</sub> ) <sub>6</sub> ·3O(CH <sub>4</sub> ) <sub>2</sub> O                                                                                     |
| VOPCEI | 2.058 Å | Shakeri, V.; Haussuhl, S. <i>Z. Kristallogr.</i> <b>1992</b> , <i>198</i> , 169. [Mg((H <sub>2</sub> O) <sub>6</sub> )(C <sub>6</sub> H <sub>6</sub> NO <sub>3</sub> S) <sub>2</sub>                                                                                                                                                |
| VUNFER | 2.058 Å | Ru Ding, R.; Wei, T.; Wang, Q.-Y.; Wang, T.; Zhang, Z.-T. <i>Z. Anorg. Allg. Chem.</i> <b>2015</b> , <i>641</i> , 1130. [Mg(H <sub>2</sub> O) <sub>6</sub> ](C <sub>16</sub> H <sub>11</sub> O <sub>7</sub> S) <sub>2</sub> ·2H <sub>2</sub> O                                                                                      |
| WUNWAF | 2.058 Å | Tutusaus, O.; Mohtadi, R.; Arthur, T. S.; Mizuno, F.; Nelson, E. G.; Sevryugina, Y. V. <i>Angew. Chem., Int. Ed.</i> <b>2015</b> , <i>54</i> , 7900. [Mg(H <sub>2</sub> O) <sub>6</sub> ](CH <sub>12</sub> B <sub>11</sub> ) <sub>2</sub> ·1.5H <sub>2</sub> O                                                                      |
| YIKKEK | 2.058 Å | Hennings, E.; Schmidt, H.; Voigt, W. <i>Acta Crystallogr., Sect. C</i> <b>2013</b> , <i>69</i> , 1292. [Mg(H <sub>2</sub> O) <sub>6</sub> ]Br <sub>2</sub> ·3H <sub>2</sub> O                                                                                                                                                       |
| YAQVUI | 2.058 Å | Novitchi, G.; Costes, J.-P.; Ciornea, V.; Shova, S.; Filippova, I.; Simonov, Y. A.; Gulea, A. <i>Eur. J. Inorg. Chem.</i> <b>2005</b> , 929. [Mg(H <sub>2</sub> O) <sub>6</sub> ][CrC <sub>12</sub> H <sub>14</sub> N <sub>2</sub> O <sub>14</sub> ]·4H <sub>2</sub> O                                                              |
| ZARMEK | 2.058 Å | Harrowfield, J. M.; Skelton, B. W.; White, A. H. <i>Aust. J. Chem.</i> <b>1995</b> , <i>48</i> , 1333. [Mg((H <sub>2</sub> O) <sub>6</sub> )(C <sub>6</sub> H <sub>2</sub> N <sub>3</sub> O <sub>7</sub> ) <sub>2</sub> ·3H <sub>2</sub> O                                                                                          |
| 9264   | 2.059 Å | Fischer, W. <i>Neues Jahrbuch fuer Mineralogie. Monatshefte</i> <b>1973</b> , 100-109. K[Mg(H <sub>2</sub> O) <sub>6</sub> ]Cl <sub>3</sub>                                                                                                                                                                                         |
| 34694  | 2.059 Å | Agron, P. A.; Busing, W. R. <i>Acta Crystallogr., Sect. A</i> <b>1969</b> , <i>25</i> , 118-119. [Mg(H <sub>2</sub> O) <sub>6</sub> ]Cl <sub>2</sub>                                                                                                                                                                                |
| AJIDUT | 2.059 Å | Zhang, W.; Chen, Y.-T. <i>Acta Crystallogr., Sect. E</i> <b>2009</b> , <i>65</i> , m1549. [Mg(H <sub>2</sub> O) <sub>6</sub> ](C <sub>6</sub> H <sub>3</sub> NH <sub>2</sub> (SO <sub>3</sub> )(CH <sub>3</sub> )) <sub>2</sub>                                                                                                     |
| ANAPHS | 2.059 Å | Cody, V.; Hazel, J. <i>Acta Crystallogr., Sect B</i> <b>1977</b> , <i>33</i> , 3180. [Mg((H <sub>2</sub> O) <sub>6</sub> )(C <sub>16</sub> H <sub>12</sub> NO <sub>3</sub> S) <sub>2</sub> ·6H <sub>2</sub> O                                                                                                                       |
| BIHNEM | 2.059 Å | Kennedy, A. R.; Kirkhouse, J. B. A.; McCarney, K. M.; Puissegur, O.; Smith, W. E.; Staunton, E.; Teat, S. J.; Cherryman, J. C.; James, R. <i>Chem. Eur. J.</i> <b>2004</b> , <i>10</i> , 4606. [Mg(H <sub>2</sub> O) <sub>6</sub> ](C <sub>12</sub> H <sub>9</sub> N <sub>2</sub> O <sub>4</sub> S) <sub>2</sub> ·2H <sub>2</sub> O |
| CAWCEK | 2.059 Å | Kennedy, A. R.; Stewart, H.; Eremin, K.; Stenger, J. <i>J. Chem. Eur. J.</i> <b>2012</b> , <i>18</i> , 3064. [Mg(H <sub>2</sub> O) <sub>6</sub> ](C <sub>20</sub> H <sub>13</sub> N <sub>2</sub> O <sub>4</sub> S) <sub>2</sub> ·4H <sub>2</sub> O                                                                                  |

|          |         |                                                                                                                                                                                                                                                                                                                            |
|----------|---------|----------------------------------------------------------------------------------------------------------------------------------------------------------------------------------------------------------------------------------------------------------------------------------------------------------------------------|
| CIRVAA04 | 2.059 Å | Malaspina, L. A.; Hoser, A. A.; Edwards, A. J.; Woinska, M.; Turner, M. J.; Price, J. R.; Sugimoto, K.; Nishibori, E.; Bürgi, H.-B.; Jayatilaka, D.; Grabowsky, S. <i>CrystEngComm</i> <b>2020</b> , <i>22</i> , 4778.<br>[Mg(H <sub>2</sub> O) <sub>6</sub> ](C <sub>4</sub> H <sub>3</sub> O <sub>4</sub> ) <sub>2</sub> |
| CIRVAA05 | 2.059 Å | Malaspina, L. A.; Genoni, A.; Jayatilaka, D.; Turner, M. J.; Sugimoto, K.; Nishibori, E.; Grabowsky, S. <i>J. Appl. Crystallogr.</i> <b>2021</b> , <i>54</i> , 718. [Mg(H <sub>2</sub> O) <sub>6</sub> ](C <sub>4</sub> H <sub>3</sub> O <sub>4</sub> ) <sub>2</sub>                                                       |
| HEBBAT   | 2.059 Å | Chang, L.-M.; Zhao, X.; Gu, Z.-G.; Liu, W.-J.; Wei, Z.-Q.; Liu, Y.-L.; Mo, H.-H.; Yue, S.-T. <i>Z. Anorg. Allg. Chem.</i> <b>2012</b> , <i>638</i> , 652. [Mg(H <sub>2</sub> O) <sub>6</sub> ][MgNdC <sub>12</sub> H <sub>12</sub> O <sub>15</sub> ] <sub>2</sub> ·6H <sub>2</sub> O                                       |
| RIHCOC   | 2.059 Å | Astbury, C.; Conway, L. K.; Gillespie, C.; Hodge, K.; Innes, E.; Kennedy, A. R. <i>Dyes Pigm.</i> <b>2013</b> , <i>97</i> , 100. [Mg(H <sub>2</sub> O) <sub>6</sub> ](C <sub>15</sub> H <sub>13</sub> N <sub>4</sub> O <sub>3</sub> S) <sub>2</sub> ·6H <sub>2</sub> O                                                     |
| SUGKAI   | 2.059 Å | Zhao, Z. CCDC deposition number 1055925, <b>2015</b> . [Mg(H <sub>2</sub> O) <sub>6</sub> ](C <sub>2</sub> N <sub>10</sub> )·2H <sub>2</sub> O                                                                                                                                                                             |
| TUTPAC   | 2.059 Å | Ren, J.; Zhang, W.; Zhang, T.; Yin, Y.; Wang, L.; Li, Z.; Zeng, Q.; Zhang, T. <i>J. Ener. Mater.</i> <b>2020</b> , <i>1</i> .<br>[Mg(H <sub>2</sub> O) <sub>6</sub> ](C <sub>2</sub> N <sub>6</sub> O <sub>3</sub> ) <sub>2</sub> ·2H <sub>2</sub> O                                                                       |
| YIYBOZ   | 2.059 Å | Hamdy, L. B.; Raithby, P. R. Thomas, L. H.; Wilson, C. C. <i>New. J. Chem.</i> <b>2014</b> , <i>38</i> , 2135.<br>[Mg(H <sub>2</sub> O) <sub>6</sub> ][MgC <sub>14</sub> H <sub>10</sub> N <sub>2</sub> O <sub>10</sub> ] <sub>3</sub> ·3H <sub>2</sub> O                                                                  |
| ZZZNLI01 | 2.059 Å | Fewings, K. R.; Junk, P. C.; Georganopoulou, D.; Prince, P. D.; Steed, J. W. <i>Polyhedron</i> <b>2001</b> , <i>20</i> , 643.<br>[Mg((H <sub>2</sub> O) <sub>6</sub> )](C <sub>7</sub> H <sub>7</sub> O <sub>3</sub> S) <sub>2</sub>                                                                                       |
| 22508    | 2.060 Å | Tabachenko, V. V.; Kovba, L. M.; Serezhkin, V. N. <i>Koord. Khim.</i> <b>1983</b> , <i>9</i> , 1568-1571.<br>[Mg(H <sub>2</sub> O) <sub>6</sub> ](UO <sub>2</sub> ) <sub>3</sub> (MoO <sub>4</sub> ) <sub>4</sub> ·2H <sub>2</sub> O                                                                                       |
| 236335   | 2.060 Å | Fortes, A. D.; Wood, I. G.; Gutmann, M. J. <i>Acta Crystallogr., Sect. C</i> <b>2013</b> , <i>69</i> , 324.<br>[Mg(H <sub>2</sub> O) <sub>6</sub> ]CrO <sub>4</sub> ·5H <sub>2</sub> O                                                                                                                                     |
| 250186   | 2.060 Å | Kuratieva, N. V.; Naumova, M. I.; Naumov, D.Y.; Podberezskaya, N. V. <i>Zh. Strukt. Khim.</i> <b>2004</b> , <i>45</i> , 296.<br>[Mg(H <sub>2</sub> O) <sub>6</sub> ](H <sub>2</sub> PO <sub>4</sub> ) <sub>2</sub>                                                                                                         |
| 413594   | 2.060 Å | Tiritiris, I.; Schleid, T. <i>Z. Anorg. Allg. Chem.</i> <b>2004</b> , <i>630</i> , 541. [Mg(H <sub>2</sub> O) <sub>6</sub> ]B <sub>12</sub> H <sub>12</sub> ·6H <sub>2</sub> O                                                                                                                                             |
| 433851   | 2.060 Å | Sun, C.; Zhang, C.; Jiang, C.; Yang, C.; Du, Y.; Zhao, Y.; Hu, B.; Zheng, Z. <i>Nature Commun.</i> <b>2018</b> , <i>9</i> , 1269. [Mg(H <sub>2</sub> O) <sub>6</sub> ] <sub>3</sub> (N <sub>5</sub> ) <sub>2</sub> ·4H <sub>2</sub> O                                                                                      |
| AMATIT   | 2.060 Å | Bednarchuk, T. J.; Kinzhybalov, V.; Bednarchuk, O.; Pietraszko, A. <i>J. Mol. Struct.</i> <b>2016</b> , <i>1120</i> , 138.<br>[Mg(H <sub>2</sub> O) <sub>6</sub> ](4-C <sub>5</sub> H <sub>5</sub> N-NH <sub>2</sub> ) <sub>2</sub> (SO <sub>4</sub> ) <sub>2</sub>                                                        |
| CIRVAA02 | 2.060 Å | Malaspina, L. A.; Edwards, A. J.; Woinska, M.; Jayatilaka, D.; Turner, M. J.; Price, J. R.; Herbst-Irmer, R.; Sugimoto, K.; Nishibori, E.; Grabowsky, S. <i>Cryst. Growth Des.</i> <b>2017</b> , <i>17</i> , 3812.<br>[Mg((H <sub>2</sub> O) <sub>6</sub> )](C <sub>4</sub> H <sub>3</sub> O <sub>4</sub> ) <sub>2</sub>   |
| CUPSIQ   | 2.060 Å | Kennedy, A. R.; Andrikopoulos, P. C.; Arlin, J.-B.; Armstrong, D. R.; Duxbury, N.; Graham, D. V.; Kirkhouse, J. B. A. <i>Chem. Eur. J.</i> <b>2009</b> , <i>15</i> , 9494. [Mg(H <sub>2</sub> O) <sub>6</sub> ](C <sub>16</sub> H <sub>15</sub> N <sub>4</sub> O <sub>3</sub> S) <sub>2</sub> ·9H <sub>2</sub> O           |

|        |         |                                                                                                                                                                                                                                                                                                                             |
|--------|---------|-----------------------------------------------------------------------------------------------------------------------------------------------------------------------------------------------------------------------------------------------------------------------------------------------------------------------------|
| ILUXAO | 2.060 Å | Gatjens, J.; Meier, B.; Adachi, Y.; Sakurai, H.; Rehder, D. <i>Eur. J. Inorg. Chem.</i> <b>2006</b> , 3575. [Mg(H <sub>2</sub> O) <sub>6</sub> ](C <sub>8</sub> H <sub>6</sub> NO <sub>4</sub> ) <sub>2</sub> ·4H <sub>2</sub> O                                                                                            |
| KIMNID | 2.060 Å | Schier, A.; Gamper, S.; Müller, G. <i>Inorg Chim. Acta</i> <b>1990</b> , 177, 179. [Mg((H <sub>2</sub> O) <sub>6</sub> )(C <sub>2</sub> H <sub>7</sub> NO <sub>3</sub> P) <sub>2</sub> ·2H <sub>2</sub> O                                                                                                                   |
| LAFYIB | 2.060 Å | Liu, W.-L.; Zou, Y.; Lu, C.-S.; Dang, D.-B.; Li, Y.-Z.; Yao, Y.-G.; Meng, Q.-J. <i>Polyhedron</i> <b>2004</b> , 23, 2125. [Mg(H <sub>2</sub> O) <sub>6</sub> ][CuC <sub>12</sub> H <sub>11</sub> N <sub>2</sub> O <sub>8</sub> ] <sub>2</sub> ·4H <sub>2</sub> O                                                            |
| MGNTSP | 2.060 Å | Talberg, H. J. <i>Acta Chem. Scand., Ser. A</i> <b>1977</b> , 31, 37. [Mg((H <sub>2</sub> O) <sub>6</sub> )(C <sub>2</sub> H <sub>17</sub> NO <sub>3</sub> P) <sub>2</sub> ·2H <sub>2</sub> O                                                                                                                               |
| MITKUY | 2.060 Å | Lesniewska, B.; Coleman, A. W.; Perret, F.; Suwinska, K. <i>Cryst. Growth Des.</i> <b>2019</b> , 19, 1695. [Mg((H <sub>2</sub> O) <sub>6</sub> )(C <sub>12</sub> H <sub>9</sub> N <sub>2</sub> ) <sub>4</sub> (C <sub>42</sub> H <sub>30</sub> O <sub>24</sub> S <sub>6</sub> )·17H <sub>2</sub> O                          |
| OBOHIY | 2.060 Å | Zhang, Y. <i>Acta Crystallogr., Sect. E</i> <b>2011</b> , 67, m1856. [Mg(H <sub>2</sub> O) <sub>6</sub> ]Cl(C <sub>8</sub> H <sub>6</sub> N <sub>5</sub> O <sub>2</sub> )·2H <sub>2</sub> O                                                                                                                                 |
| OLEFIX | 2.060 Å | Mudsainiyan, R. K.; Jassal, A. K.; Islam, N. . <i>J. Mol. Struct.</i> <b>2021</b> , 1232, 130073. [Mg(H <sub>2</sub> O) <sub>6</sub> ](C <sub>7</sub> H <sub>5</sub> N <sub>2</sub> O <sub>4</sub> ) <sub>2</sub> ·C <sub>10</sub> H <sub>8</sub> N <sub>2</sub> ·H <sub>2</sub> O                                          |
| VILLAE | 2.060 Å | Mastropietro, T. F.; Armentano, D. Marino, N.; De Munno, G. <i>Polyhedron</i> <b>2007</b> , 27, 4945. [Mg(H <sub>2</sub> O) <sub>6</sub> ]Cl <sub>2</sub> ·2C <sub>5</sub> H <sub>5</sub> N <sub>5</sub>                                                                                                                    |
| VILLEI | 2.060 Å | Mastropietro, T. F.; Armentano, D. Marino, N.; De Munno, G. <i>Polyhedron</i> <b>2007</b> , 27, 4945. [Mg(H <sub>2</sub> O) <sub>6</sub> ]Br <sub>2</sub> ·2C <sub>5</sub> H <sub>5</sub> N <sub>5</sub>                                                                                                                    |
| VINJEK | 2.060 Å | Li, C.; Deng, Z.-P.; Huo, L.-H.; Gao, S. <i>CrystEngComm</i> <b>2018</b> , 20, 7513. [Mg((H <sub>2</sub> O) <sub>6</sub> )(C <sub>12</sub> H <sub>9</sub> SO <sub>4</sub> ) <sub>2</sub> ·(C <sub>12</sub> H <sub>9</sub> SO <sub>4</sub> )·4H <sub>2</sub> O                                                               |
| XAHFAQ | 2.060 Å | Yu, Y.-Z.; Li, Y.-N.; Deng, Z.-P.; Zhu, Z.-B.; Huo, L.-H.; Gao, S. <i>Eur. J. Inorg. Chem.</i> <b>2015</b> , 2254. [Mg(H <sub>2</sub> O) <sub>6</sub> ](C <sub>12</sub> H <sub>8</sub> O <sub>8</sub> S <sub>2</sub> )·H <sub>2</sub> O                                                                                     |
| XECJIY | 2.060 Å | Ptasiewicz-Bak, H.; Leciejewicz, J. <i>J. Coord. Chem.</i> <b>1998</b> , 44, 299. [Mg((H <sub>2</sub> O) <sub>6</sub> )C <sub>6</sub> H <sub>2</sub> N <sub>2</sub> O <sub>4</sub>                                                                                                                                          |
| YIKKAG | 2.060 Å | Hennings, E.; Schmidt, H.; Voigt, W. <i>Acta Crystallogr., Sect. C</i> <b>2013</b> , 69, 1292. [Mg(H <sub>2</sub> O) <sub>6</sub> ]Cl <sub>2</sub> ·6H <sub>2</sub> O                                                                                                                                                       |
| XEZCIP | 2.060 Å | Xie, Y.-R.; Ge, G.-W.; Yuan, X.-Y.; Wan, D.-B.; Yang, R.-Q. <i>Acta Crystallogr., Sect. E</i> <b>2007</b> , 63, m812. [Mg(H <sub>2</sub> O) <sub>6</sub> ](C <sub>7</sub> H <sub>6</sub> NO <sub>5</sub> S)·2H <sub>2</sub> O                                                                                               |
| 16326  | 2.061 Å | Clark, J.; Evans, Jr., H. T.; Erd, R. C. <i>Acta Crystallogr., Sect. B</i> <b>1980</b> , 36, 2736-2739. Ca[Mg(H <sub>2</sub> O) <sub>6</sub> ] <sub>2</sub> Cl <sub>6</sub>                                                                                                                                                 |
| 16546  | 2.061 Å | Zalkin, A.; Ruben, H.; Templeton, D. H. <i>Acta Crystallogr.</i> , <b>1964</b> , 17, 235-240. [Mg(H <sub>2</sub> O) <sub>6</sub> ][p-ONC <sub>6</sub> H <sub>4</sub> O) <sub>2</sub>                                                                                                                                        |
| 192443 | 2.061 Å | Nitschke, C.; Koeckerling, M.; Bernhardt, E.; Kueppers, T.; Willner, H. <i>Dalton Trans.</i> <b>2014</b> , 43, 7128. [Mg(H <sub>2</sub> O) <sub>6</sub> ](B(CN) <sub>4</sub> )                                                                                                                                              |
| ADUMAQ | 2.061 Å | Xu, X. Lu, Y.; Hu, F.; Xu, L.; Shuai, Q. <i>J. Coord. Chem.</i> <b>2016</b> , 69, 3294. [Mg(H <sub>2</sub> O) <sub>6</sub> ][FeC <sub>11</sub> H <sub>9</sub> O <sub>3</sub> ] <sub>2</sub> ·2H <sub>2</sub> O                                                                                                              |
| BIHLIO | 2.061 Å | Kennedy, A. R.; Kirkhouse, J. B. A.; McCarney, K. M.; Puissegur, O.; Smith, W. E.; Staunton, E.; Teat, S. J.; Cherryman, J. C.; James, R. <i>Chem. Eur. J.</i> <b>2004</b> , 10, 4606. [Mg(H <sub>2</sub> O) <sub>6</sub> ](C <sub>12</sub> H <sub>9</sub> N <sub>2</sub> O <sub>4</sub> S) <sub>2</sub> ·2H <sub>2</sub> O |

|          |         |                                                                                                                                                                                                                                                                                             |
|----------|---------|---------------------------------------------------------------------------------------------------------------------------------------------------------------------------------------------------------------------------------------------------------------------------------------------|
| CABLEA01 | 2.061 Å | Liebing, P.; Oehler, F.; Witzorke, J.; Schmeide, M. <i>CrystEngComm</i> <b>2020</b> , <i>22</i> , 7838.<br>[Mg(H <sub>2</sub> O) <sub>6</sub> ] <sub>2</sub> [Pt(S <sub>2</sub> CN(CH <sub>2</sub> COO) <sub>2</sub> ) <sub>2</sub> ](CH <sub>3</sub> ) <sub>2</sub> CO·9.5H <sub>2</sub> O |
| CAWTID   | 2.061 Å | Riley, P. E.; Pecoraro, V. L. Carrano, C. J.; Raymond, K. N. <i>Inorg. Chem.</i> <b>1983</b> , <i>22</i> , 3096.<br>[Mg((H <sub>2</sub> O) <sub>6</sub> )[GaC <sub>18</sub> H <sub>16</sub> N <sub>2</sub> O <sub>6</sub> ] <sub>2</sub> ·3H <sub>2</sub> O                                 |
| DAWVED   | 2.061 Å | Rychlewska, U.; Guresic, D. M.; Warzajtis, B.; Radanovic, D. D.; Djuran, M. I. <i>Polyhedron</i> <b>2005</b> , <i>24</i> , 2009. [Mg(H <sub>2</sub> O) <sub>6</sub> ][ZnC <sub>11</sub> H <sub>14</sub> N <sub>2</sub> O <sub>8</sub> ] <sub>2</sub> ·2H <sub>2</sub> O                     |
| FAHJOQ   | 2.061 Å | Yang, J.-H.; Cheng, R.-M.; Jia, Y.-Y.; Jin, J.; Yang, B.-B.; Cao, Z.; Liu, B. <i>Dalton Trans.</i> <b>2016</b> , <i>45</i> , 2945. K[Mg(H <sub>2</sub> O) <sub>6</sub> ] <sub>2</sub> [Ru <sub>2</sub> Cl <sub>2</sub> (CO <sub>3</sub> ) <sub>4</sub> ] <sub>2</sub> ·4H <sub>2</sub> O    |
| FUGCAM   | 2.061 Å | Jiang, J.; Lu, Y.; Yuan, L.; Liu, W. <i>Acta Crystallogr., Sect. E</i> <b>2009</b> , <i>65</i> , m1352.<br>[Mg(H <sub>2</sub> O) <sub>6</sub> ][CuC <sub>12</sub> H <sub>11</sub> N <sub>2</sub> O <sub>5</sub> ] <sub>2</sub> ·6H <sub>2</sub> O                                           |
| PONGIJ01 | 2.061 Å | Perrin, C. L.; Lau, J. S. Kim, Y.-J.; Karri, P.; Moore, C.; Rheingold, A. L. <i>J. Am. Chem. Soc.</i> <b>2009</b> , <i>131</i> , 13548. [Mg(H <sub>2</sub> O) <sub>6</sub> ](C <sub>12</sub> H <sub>21</sub> O <sub>4</sub> ) <sub>2</sub> ·H <sub>2</sub> O                                |
| QOFGID   | 2.061 Å | Nitschke, C.; Kockerling, M.; Bernhardt, E.; Kupperts, T.; Willner, H. <i>Dalton Trans.</i> <b>2014</b> , <i>43</i> , 7128.<br>[Mg(H <sub>2</sub> O) <sub>6</sub> ](B(CN) <sub>4</sub> ) <sub>2</sub>                                                                                       |
| RAHLAP   | 2.061 Å | Gusev, I. M.; Skripkin, M. Y.; Spektor, K. K.; Starova, G. L. <i>Zh. Obshch. Khim.</i> <b>2011</b> , <i>81</i> , 529.<br>(CH <sub>3</sub> ) <sub>4</sub> N[Mg(H <sub>2</sub> O) <sub>6</sub> ]Br <sub>3</sub>                                                                               |
| RAMXOS   | 2.061 Å | Henke, K. R.; Hutchison, A. R.; Krepps, M. K.; Parkin, S.; Atwood, D. A. <i>Inorg. Chem.</i> <b>2001</b> , <i>40</i> , 4443.<br>[Mg((H <sub>2</sub> O) <sub>6</sub> )(C <sub>3</sub> H <sub>12</sub> N <sub>3</sub> S <sub>3</sub> ) <sub>2</sub>                                           |
| REFTEC   | 2.061 Å | Rodrigues, V. H.; Beja, A. M.; Paixao, J. A.; Costa, M. M. R. <i>Z. Kristallogr. – New Cryst. Struct.</i> <b>2005</b> , <i>220</i> , 620. [Mg(H <sub>2</sub> O) <sub>6</sub> ]SO <sub>4</sub> ·(C <sub>5</sub> H <sub>11</sub> NO <sub>2</sub> ) <sub>2</sub> ·3H <sub>2</sub> O            |
| RIVCAA   | 2.061 Å | Geday, M. A.; De Munno, G.; Medaglia, M.; Anastassopoulou, J.; Theophanides, T. <i>Angew. Chem., Int. Ed. Engl.</i> <b>1997</b> , <i>36</i> , 511. [Mg((H <sub>2</sub> O) <sub>6</sub> )(ClO <sub>4</sub> ) <sub>2</sub> ·6C <sub>5</sub> H <sub>7</sub> N <sub>3</sub> O·H <sub>2</sub> O  |
| TAKZEK   | 2.061 Å | Coiro, V. M.; Mazza, F. <i>Acta Crystallogr., Sect. C</i> <b>1991</b> , <i>47</i> , 1169. [Mg((H <sub>2</sub> O) <sub>6</sub> )(n-C <sub>12</sub> H <sub>25</sub> OSO <sub>3</sub> ) <sub>2</sub>                                                                                           |
| VUKMIX   | 2.061 Å | Shkol'nikova, L. M.; Polyanchuk, G. V.; Poznyak, A. L.; Yashunskii, V. G.; Ilyukhin, A. B. <i>Koord. Khim.</i> <b>1991</b> , <i>17</i> , 626. [Mg((H <sub>2</sub> O) <sub>6</sub> )[CoC <sub>12</sub> H <sub>16</sub> N <sub>2</sub> O <sub>8</sub> ] <sub>2</sub> ·2H <sub>2</sub> O       |
| XOSGIY   | 2.061 Å | Savchenkov, A. V.; Pirozhkov, P. A.; Vologzhanina, A. V.; Zubavichus, Y. V.; Dorovatovskii, P. V.; Pushkin, D. V.; Serezhkina, L. B. <i>Chem. Sel.</i> <b>2019</b> , <i>4</i> , 8416. [Mg((H <sub>2</sub> O) <sub>6</sub> )[UO <sub>2</sub> (OOCCHCHCH <sub>3</sub> ) <sub>3</sub> ]        |
| YIKKIO   | 2.061 Å | Hennings, E.; Schmidt, H.; Voigt, W. <i>Acta Crystallogr., Sect. C</i> <b>2013</b> , <i>69</i> , 1292. [Mg(H <sub>2</sub> O) <sub>6</sub> ] <sub>2</sub> ·3H <sub>2</sub> O                                                                                                                 |
| 589      | 2.062 Å | Yamashita, K.; Komatsu, K.; Hattori, T.; Machida, S.; Kagi, H. <i>Acta Crystallogr., Sect. C</i> <b>2019</b> , <i>75</i> , 1605. [Mg((H <sub>2</sub> O) <sub>6</sub> )Cl <sub>2</sub>                                                                                                       |
| 5950     | 2.062 Å | Wang, Y.; Han, J.; Guo, F.; Cheng, S.; Yang, Z.; Pan, S. <i>Dalton Trans.</i> <b>2019</b> , <i>48</i> , 17408.<br>[Mg(H <sub>2</sub> O) <sub>6</sub> ](BO <sub>5</sub> (OH) <sub>4</sub> )·3H <sub>2</sub> O                                                                                |
| 22072    | 2.062 Å | Goodyear, J.; Ali, S. A. D. <i>Acta Crystallogr.</i> <b>1969</b> , <i>25</i> , 2664-2664. [Mg(H <sub>2</sub> O) <sub>6</sub> ]ClBr                                                                                                                                                          |

|          |         |                                                                                                                                                                                                                                                                                                                                                                             |
|----------|---------|-----------------------------------------------------------------------------------------------------------------------------------------------------------------------------------------------------------------------------------------------------------------------------------------------------------------------------------------------------------------------------|
| 26020    | 2.062 Å | Sasvari, K.; Jeffrey, G. <i>Acta Crystallogr.</i> <b>1966</b> , <i>20</i> , 875-881. [Mg(H <sub>2</sub> O) <sub>6</sub> ]Cl <sub>2</sub> ·6H <sub>2</sub> O                                                                                                                                                                                                                 |
| 32512    | 2.062 Å | Ledesert, M.; Monier, J.-C. <i>Acta Crystallogr., Sect. B</i> <b>1982</b> , <i>38</i> , 237-239. Cd <sub>2</sub> [Mg(H <sub>2</sub> O) <sub>6</sub> ]Cl <sub>6</sub>                                                                                                                                                                                                        |
| 35417    | 2.062 Å | Brodersen, K.; Pezzei, G. <i>Z. Anorg. Allg. Chem.</i> <b>1983</b> , <i>499</i> , 169-174. [Mg(H <sub>2</sub> O) <sub>6</sub> ]Hg <sub>3</sub> Cl <sub>8</sub>                                                                                                                                                                                                              |
| 413819   | 2.062 Å | Miras, H. N.; Raptis, R. G.; Lalioti, N.; Sigalas, M. P. Baran, P.; Kabanos, T. A. <i>Chem. Eur. J.</i> <b>2005</b> , <i>11</i> , 2295. [Mg(H <sub>2</sub> O) <sub>6</sub> ][Na <sub>4</sub> (H <sub>2</sub> O) <sub>14</sub> ][V <sub>10</sub> O <sub>28</sub> ]·3H <sub>2</sub> O                                                                                         |
| EGAXIV   | 2.062 Å | Singh, S.; Saini, D.; Kaur, G.; Mehta, S. K.; Kaur, R.; Ferretti, V. <i>Inorg. Chim. Acta</i> <b>2014</b> , <i>419</i> , 13. [Mg(H <sub>2</sub> O) <sub>6</sub> ](CCl <sub>3</sub> COO) <sub>2</sub>                                                                                                                                                                        |
| EGOFAK   | 2.062 Å | Black, D. T.; Kennedy, A. R.; Lobato, K. M. <i>Acta Crystallogr. Sect. C</i> <b>2019</b> , <i>75</i> , 633. [Mg((H <sub>2</sub> O) <sub>6</sub> )(C <sub>18</sub> H <sub>14</sub> N <sub>2</sub> O <sub>7</sub> S <sub>2</sub> ) <sub>2</sub> ·(CH <sub>3</sub> ) <sub>2</sub> CHO                                                                                          |
| FADPEG   | 2.062 Å | Minacheva, L. Kh.; Skogareva, L. S.; Sergienko, V. S. <i>Zh. Neorg. Khim.</i> <b>2001</b> , <i>46</i> , 1289. [Mg((H <sub>2</sub> O) <sub>6</sub> )(ClO <sub>4</sub> ) <sub>2</sub> ·2C <sub>6</sub> H <sub>12</sub> N <sub>4</sub> ·2H <sub>2</sub> O                                                                                                                      |
| FAPFOR10 | 2.062 Å | Shibahara, T.; Kuroya, H.; Akashi, H.; Matsumoto, K.; Ooi, S. <i>Inorg. Chim. Acta</i> <b>1993</b> , <i>212</i> , 251. [Mg((H <sub>2</sub> O) <sub>6</sub> ) <sub>2</sub> [Mo <sub>4</sub> C <sub>20</sub> H <sub>24</sub> N <sub>4</sub> O <sub>16</sub> S <sub>4</sub> ]·10H <sub>2</sub> O                                                                               |
| IDIFEG   | 2.062 Å | Yan, W. B.; Deng, Y. F.; Zhang, F. Z.; Zhou, Z. H.; Wan, H. L., Ng, S. W. <i>Acta Crystallogr., Sect. E</i> <b>2002</b> , <i>58</i> , m22. [Mg((H <sub>2</sub> O) <sub>6</sub> ) <sub>2</sub> [Mo <sub>2</sub> C <sub>12</sub> H <sub>14</sub> N <sub>2</sub> O <sub>17</sub> ]·6H <sub>2</sub> O                                                                           |
| JEYCEW   | 2.062 Å | Beck, J.; Ben-Amer, Y. <i>Z. Anorg. Allg. Chem.</i> <b>2007</b> , <i>633</i> , 435. [Mg(H <sub>2</sub> O) <sub>6</sub> ]C <sub>4</sub> S <sub>4</sub>                                                                                                                                                                                                                       |
| KALXAZ   | 2.062 Å | Novikov, S. A.; Grigor'ev, M. S.; Serezhkina, L. B.; Serezhkin, V. N. <i>J. Solid State Chem.</i> <b>2017</b> , <i>248</i> , 178. [Mg((H <sub>2</sub> O) <sub>6</sub> )[UO <sub>2</sub> C <sub>12</sub> H <sub>12</sub> O <sub>14</sub> ]·2H <sub>2</sub> O                                                                                                                 |
| LOJWOZ   | 2.062 Å | Xanthopoulos, K.; Anagnostou, Z.; Chalkiadakis, S.; Choquesillo-Lazarte, D.; Mezei, G.; Zareba, J. K.; Zon, J.; Demadis, K. D. <i>Crystals</i> <b>2019</b> , <i>9</i> , 301. [Mg((H <sub>2</sub> O) <sub>6</sub> )((O <sub>3</sub> PCH <sub>2</sub> ) <sub>2</sub> NH(CH <sub>2</sub> ) <sub>4</sub> NH(CH <sub>2</sub> PO <sub>3</sub> ) <sub>2</sub> )                    |
| MOYVOM   | 2.062 Å | Zhou, Y.; Yang, G.-W.; Li, Q.-Y.; Liu, K.; Gu, G.-Q.; Ma, Y.-S.; Yuan, R.-X. <i>Inorg. Chim. Acta</i> <b>2009</b> , <i>362</i> , 1723. [Mg(H <sub>2</sub> O) <sub>6</sub> ](C <sub>8</sub> H <sub>6</sub> N <sub>5</sub> O <sub>2</sub> ) <sub>2</sub> ·2H <sub>2</sub> O                                                                                                   |
| OLOKAD   | 2.062 Å | Xie, Y.; Shaffer, D. W.; Lewandowska-Andralojc, A.; Szalda, D. J.; Concepcion, J. J. <i>Angew, Chem, Int. Ed.</i> <b>2016</b> , <i>55</i> , 8067. [Mg(H <sub>2</sub> O) <sub>6</sub> ][RuC <sub>22</sub> H <sub>20</sub> N <sub>4</sub> O <sub>6</sub> P <sub>2</sub> ]·14H <sub>2</sub> O                                                                                  |
| QAJYOT   | 2.062 Å | Shang, W.; Schlam, R. F.; Hickey, M. B.; Zhou, J.; Wheeler, K. A.; de Delgado, G. C. D.; Chen, C.-H.; Snider, B. B.; Foxman, B. M. <i>Cryst. Growth Des.</i> <b>2021</b> , <i>21</i> , 663. [Mg(H <sub>2</sub> O) <sub>6</sub> ](CH <sub>3</sub> (CH) <sub>2</sub> COO) <sub>0.42</sub> (C <sub>8</sub> H <sub>10</sub> O <sub>4</sub> ) <sub>0.79</sub> ·2H <sub>2</sub> O |
| QECSID   | 2.062 Å | Xu, Y.; Wang, Q.; Shen, C.; Lin, Q.; Wang, P.; Lu, M. <i>Nature</i> <b>2017</b> , <i>549</i> , 78. [Mg((H <sub>2</sub> O) <sub>6</sub> )(N <sub>5</sub> ) <sub>2</sub> ·4H <sub>2</sub> O                                                                                                                                                                                   |
| QOVFEP   | 2.062 Å | Wang, Y.; Han, J.; Guo, F.; Cheng, S.; Yang, Z.; Pan, S. <i>Dalton Trans.</i> <b>2019</b> , <i>48</i> , 17408. [Mg((H <sub>2</sub> O) <sub>6</sub> )[B <sub>4</sub> H <sub>4</sub> O <sub>9</sub> ]·3H <sub>2</sub> O                                                                                                                                                       |
| RAHLET   | 2.062 Å | Gusev, I. M.; Skripkin, M. Y.; Spektor, K. K.; Starova, G. L. <i>Zh. Obshch. Khim.</i> <b>2011</b> , <i>81</i> , 529. (C <sub>2</sub> H <sub>5</sub> ) <sub>4</sub> N[Mg(H <sub>2</sub> O) <sub>6</sub> ]Br <sub>3</sub>                                                                                                                                                    |
| TEKSUA   | 2.062 Å | Sunkel, K.; Nimax, P. R. <i>Dalton Trans.</i> <b>2018</b> , <i>47</i> , 409. [Mg((H <sub>2</sub> O) <sub>6</sub> )(C <sub>5</sub> (CN) <sub>5</sub> ) <sub>2</sub> ·4H <sub>2</sub> O                                                                                                                                                                                       |

|          |         |                                                                                                                                                                                                                                                                                                                                                              |
|----------|---------|--------------------------------------------------------------------------------------------------------------------------------------------------------------------------------------------------------------------------------------------------------------------------------------------------------------------------------------------------------------|
| TEZGOW   | 2.062 Å | Ma, K.-R.; Wei, C.-L.; Zhang, Y.; Kan, Y.-H.; Cong, M.-H.; Yang, X.-J. <i>J. Spectrosc.</i> <b>2013</b> , 378379. [Mg(H <sub>2</sub> O) <sub>6</sub> ](C <sub>6</sub> H <sub>14</sub> N <sub>2</sub> O <sub>6</sub> P <sub>2</sub> )·4H <sub>2</sub> O                                                                                                       |
| 24842    | 2.063 Å | Elerman, Y.; Fuess, H.; Joswig, W. <i>Acta Crystallogr., Sect. B</i> <b>1982</b> , 38, 1799-1801. [Mg(H <sub>2</sub> O) <sub>6</sub> ]S <sub>2</sub> O <sub>3</sub>                                                                                                                                                                                          |
| 96559    | 2.063 Å | Waizumi, K.; Matsumoto, T.; Abe, T.; Fukushima, N.; Masuda, H. <i>J. Solid State Chem.</i> <b>2003</b> , 174, 182. [Mg(H <sub>2</sub> O) <sub>6</sub> ][CoCl <sub>4</sub> ]·2H <sub>2</sub> O                                                                                                                                                                |
| AHAKAX   | 2.063 Å | Chen, B. CCDC deposition number 1414623, <b>2015</b> . (NH <sub>4</sub> ) <sub>2</sub> [Mg(H <sub>2</sub> O) <sub>6</sub> ] <sub>2</sub> [V <sub>10</sub> O <sub>28</sub> ]·4H <sub>2</sub> O                                                                                                                                                                |
| AJIDUT01 | 2.063 Å | Tai, X.-S.; Jie, Y. <i>Crystals</i> <b>2015</b> , 5, 294. [Mg(H <sub>2</sub> O) <sub>6</sub> ](C <sub>7</sub> H <sub>8</sub> NO <sub>3</sub> S) <sub>2</sub>                                                                                                                                                                                                 |
| DIPNUL   | 2.063 Å | Cole, L. B.; Holt, E. M. <i>Inorg. Chim. Acta</i> <b>1985</b> , 108, 159. [Mg((H <sub>2</sub> O) <sub>6</sub> ) <sub>2</sub> (3-COO-C <sub>5</sub> H <sub>4</sub> N) <sub>2</sub> ·4H <sub>2</sub> O                                                                                                                                                         |
| DUVNOZ   | 2.063 Å | Klepov, V. V.; Serezhkina, L. B.; Pushkin, D. V.; Alekseev, E. V.; Grigor'ev, M. S.; Sergeeva, O. A.; Shimin, N. A.; Serezhkin, V. V. <i>J. Eur. Inorg. Chem.</i> <b>2016</b> , 118. [Mg(H <sub>2</sub> O) <sub>6</sub> ][Na(UO <sub>2</sub> (OOC(CH <sub>3</sub> )CH <sub>2</sub> ) <sub>3</sub> ) <sub>3</sub> ]                                           |
| FUYCOS03 | 2.063 Å | Missina, J. M.; Conti, L.; Rossi, P.; Ienco, A.; Nunes, G. G.; Valtancoli, B.; Chelazzi, L.; Paoli, P. <i>Inorg. Chim. Acta</i> <b>2021</b> , 523, 120319. [Mg(H <sub>2</sub> O) <sub>6</sub> ](C <sub>13</sub> H <sub>17</sub> O <sub>2</sub> ) <sub>2</sub> ·2H <sub>2</sub> O                                                                             |
| GAKPOY   | 2.063 Å | Zhao, J.-G.; Zhang, Z.-Y.; Huo, L.H.; Gao, S. <i>Acta Crystallogr., Sect. E</i> <b>2004</b> , 60, m1987. [Mg(H <sub>2</sub> O) <sub>6</sub> ](C <sub>7</sub> H <sub>6</sub> NO <sub>3</sub> ) <sub>2</sub> ·2H <sub>2</sub> O                                                                                                                                |
| HUYMEW   | 2.063 Å | Chen, Y.; Zhao, X.; Gao, R.; Ruan, Z.; Lin, J.; Liu, S.; Tian, Z.; Chen, X. <i>J. Solid State Chem.</i> <b>2020</b> , 292, 121674. [Mg(H <sub>2</sub> O) <sub>6</sub> ](C <sub>3</sub> H <sub>5</sub> N <sub>2</sub> )[Eu(C <sub>7</sub> H <sub>3</sub> NO <sub>4</sub> ) <sub>3</sub> ]·0.5 C <sub>3</sub> H <sub>4</sub> N <sub>2</sub> ·4H <sub>2</sub> O |
| LIFHEO   | 2.063 Å | Zhang, Z.-T.; Cheng, X.-L. <i>J. Coord. Chem.</i> <b>2007</b> , 60, 1111. [Mg(H <sub>2</sub> O) <sub>6</sub> ]Cl <sub>2</sub> ·(C <sub>17</sub> H <sub>13</sub> O <sub>7</sub> S) <sub>2</sub> ·8H <sub>2</sub> O                                                                                                                                            |
| POTLOC   | 2.063 Å | Ren, J.; Zhang, T.; Li, Z.; Wang, L.; Zhang, T. <i>Thermochim. Acta</i> <b>2019</b> , 682, 178391. [Mg((H <sub>2</sub> O) <sub>6</sub> )(C <sub>2</sub> N <sub>8</sub> O <sub>4</sub> )                                                                                                                                                                      |
| SEKKEZ   | 2.063 Å | Li, Q.; Fu, M.-L.; Liu, X.; Guo, G.-C.; Huang, J.-S.; <i>Inorg. Chem. Commun.</i> <b>2006</b> , 9, 767. [Mg(H <sub>2</sub> O) <sub>6</sub> ][Ag <sub>2</sub> C <sub>14</sub> H <sub>12</sub> O <sub>14</sub> S <sub>2</sub> ]·4H <sub>2</sub> O                                                                                                              |
| RAKYOR01 | 2.063 Å | Zhao, W.-H.; Chen, Y.-T.; Tai, X.-S. <i>Adv. Mater. Res.</i> <b>2014</b> , 830, 197. [Mg(H <sub>2</sub> O) <sub>6</sub> ]C <sub>10</sub> H <sub>6</sub> (SO <sub>3</sub> ) <sub>2</sub>                                                                                                                                                                      |
| TEFLEZ   | 2.063 Å | Tong, Z.; Guangyuan, Z.; Zishuai, X.; Jian, R.; Lizhen, C.; Jianlong, W. Z. <i>Kristyallogr. New Cryst. Struct.</i> 2022, 237, 309. [Mg(H <sub>2</sub> O) <sub>6</sub> ](C <sub>3</sub> HN <sub>7</sub> O <sub>5</sub> )·H <sub>2</sub> O                                                                                                                    |
| VUQVUB   | 2.063 Å | Meng, X.; Kang, K.; Liang, F.; Tang, J.; Yin, W.; Lin, Z.; Xia, M. Z. <i>Inorg. Chem. Front.</i> <b>2020</b> , 7, 3674. [Mg(H <sub>2</sub> O) <sub>6</sub> ](C <sub>3</sub> H <sub>2</sub> N <sub>3</sub> O <sub>3</sub> ) <sub>2</sub>                                                                                                                      |
| XAGVAF01 | 2.063 Å | Yurdakul, O.; Demirtas, G.; Dege, N.; Icbudak, H.; Kose, D. A.; Buyukgungor, O. <i>Hacettepe J. Biol. &amp; Chem.</i> <b>2016</b> , 44, 95. [Mg(H <sub>2</sub> O) <sub>6</sub> ](C <sub>4</sub> H <sub>4</sub> NO <sub>4</sub> S) <sub>2</sub>                                                                                                               |
| XUXLUX   | 2.063 Å | Haxia, M.; Jirong, S.; Xiaohong, S.; Rongzu, H.; Shengli, G.; Kaibei, Y. <i>Huaxue Gongcheng</i> <b>2001</b> , 29, 47. [Mg((H <sub>2</sub> O) <sub>6</sub> )(C <sub>2</sub> HN <sub>4</sub> O <sub>3</sub> ) <sub>2</sub> ·2H <sub>2</sub> O                                                                                                                 |
| YIGCOH   | 2.063 Å | Rychlewska, U.; Warzajtis, B.; Cvetic, D.; Radanovic, D. D.; Guresic, D. M.; Djuran, M. I. <i>Polyhedron</i> <b>2007</b> , 26, 1717. [Mg(H <sub>2</sub> O) <sub>6</sub> ][MgC <sub>11</sub> H <sub>14</sub> N <sub>2</sub> O <sub>8</sub> ]·2H <sub>2</sub> O                                                                                                |



|          |         |                                                                                                                                                                                                                                                                                                                                                                                |
|----------|---------|--------------------------------------------------------------------------------------------------------------------------------------------------------------------------------------------------------------------------------------------------------------------------------------------------------------------------------------------------------------------------------|
| XAJNOP   | 2.063 Å | Wang, Y.; Yang, X.; Hu, J.; Li, H.; Li, Z.; Zhang, T. <i>New J. Chem.</i> <b>2020</b> , <i>44</i> , 19054.<br>[Mg(H <sub>2</sub> O) <sub>6</sub> ](C <sub>5</sub> H <sub>4</sub> N <sub>10</sub> O <sub>4</sub> )·H <sub>2</sub> O                                                                                                                                             |
| 260038   | 2.064 Å | Weil, M.; Jerbi, H.; Ben Amara, M. <i>Acta Crystallogr., Sect. E</i> <b>2008</b> , <i>64</i> , i50. Cs[Mg(H <sub>2</sub> O) <sub>6</sub> ]PO <sub>4</sub>                                                                                                                                                                                                                      |
| 260150   | 2.064 Å | Weil, M. <i>Acta Crystallogr., Sect. E</i> <b>2009</b> , <i>65</i> , i2. Cs[Mg(H <sub>2</sub> O) <sub>6</sub> ]AsO <sub>4</sub>                                                                                                                                                                                                                                                |
| CUPVEP   | 2.064 Å | Srinivasan, B. R.; Shetgaonkar, S. Y.; Raghavaiah, P. <i>Ind. J. Chem., Sect. A</i> <b>2009</b> , <i>48</i> , 1662.<br>[Mg(H <sub>2</sub> O) <sub>6</sub> ](C <sub>8</sub> H <sub>5</sub> N <sub>2</sub> O <sub>5</sub> ) <sub>2</sub>                                                                                                                                         |
| HAGVOA   | 2.064 Å | Pech, L.; Bankovsky, Yu. Sobolev, A.; Sturis, A.; Teter, I. <i>Latv. Khim. Z.</i> <b>1992</b> , 483.<br>[Mg((H <sub>2</sub> O) <sub>6</sub> )(C <sub>10</sub> H <sub>6</sub> NO <sub>2</sub> S) <sub>2</sub> ·4H <sub>2</sub> O                                                                                                                                                |
| IMAFOR   | 2.064 Å | Radanovic, D. D.; Rychlewska, U.; Djuran, M. I.; Draskovic, N. S.; Vasojevic, M. M.; Hodzic, I. M.; Radanovic, D. J. <i>Polyhedron</i> <b>2003</b> , <i>22</i> , 2745. [Mg(H <sub>2</sub> O) <sub>6</sub> ][CoC <sub>11</sub> H <sub>16</sub> N <sub>2</sub> O <sub>8</sub> ]·2H <sub>2</sub> O                                                                                |
| JAMQAQ   | 2.064 Å | D.D.Radanovic, D. D.; Rychlewska, U.; Djuran, M. I.; Warzajtis, B.; Draskovic, N. S.; Guresic, D. M. <i>Polyhedron</i> <b>2004</b> , <i>23</i> , 2183. [Mg(H <sub>2</sub> O) <sub>6</sub> ][MgC <sub>11</sub> H <sub>14</sub> N <sub>2</sub> O <sub>8</sub> ]·2H <sub>2</sub> O                                                                                                |
| MAVDOD   | 2.064 Å | Gryz, M.; Starosta, W.; Leciejewicz, J. <i>Acta Crystallogr., Sect. E</i> <b>2005</b> , <i>61</i> , m1920.<br>[Mg(H <sub>2</sub> O) <sub>6</sub> ]C <sub>8</sub> H <sub>2</sub> O <sub>8</sub> ·4H <sub>2</sub> O                                                                                                                                                              |
| MINKOJ   | 2.064 Å | Moers, O.; Friedrichs, S.; Blaschette, A.; Jones, P. G. <i>Z. Anorg. Allg. Chem.</i> <b>2002</b> , <i>628</i> , 589.<br>[Mg((H <sub>2</sub> O) <sub>6</sub> )(C <sub>6</sub> H <sub>4</sub> NO <sub>4</sub> S <sub>2</sub> ) <sub>2</sub>                                                                                                                                      |
| NUVXAG   | 2.064 Å | Rusev, R.; Tsvetanova, L.; Shivachev, B.; Kossev, K.; Nikolova, R. <i>Bulgarian Chem. Commun.</i> <b>2018</b> , <i>50</i> , 79. [Mg((H <sub>2</sub> O) <sub>6</sub> )(BF <sub>4</sub> ) <sub>2</sub>                                                                                                                                                                           |
| POHGIC01 | 2.064 Å | Downer, S. M.; Squattrito, P. J.; Bestaoui, N.; Clearfield, A. <i>J. Chem. Cryst.</i> <b>2006</b> , <i>36</i> , 487.<br>[Mg(H <sub>2</sub> O) <sub>6</sub> ](C <sub>10</sub> H <sub>8</sub> NO <sub>3</sub> S) <sub>2</sub> ·6H <sub>2</sub> O                                                                                                                                 |
| QAKLAT05 | 2.064 Å | Shang, W.; Schlam, R. F.; Hickey, M. B.; Zhou, J.; Wheeler, K. A.; de Delgado, G. C. D.; Chen, C.-H.; Snider, B. B.; Foxman, B. M. <i>Cryst. Growth Des.</i> <b>2021</b> , <i>21</i> , 663.<br>[Mg(H <sub>2</sub> O) <sub>6</sub> ](CH <sub>3</sub> (CH) <sub>2</sub> COO) <sub>0.86</sub> (C <sub>8</sub> H <sub>10</sub> O <sub>4</sub> ) <sub>0.57</sub> ·2H <sub>2</sub> O |
| QIVHOV   | 2.064 Å | Ibad, M. F.; Schulz, A.; Villinger, A. <i>Organometallics</i> <b>2019</b> , <i>38</i> , 1445.<br>[Mg((H <sub>2</sub> O) <sub>6</sub> )[B(C <sub>6</sub> F <sub>5</sub> ) <sub>4</sub> ] <sub>2</sub> ·2C <sub>2</sub> H <sub>5</sub> OC <sub>2</sub> H <sub>5</sub>                                                                                                            |
| RATRIN01 | 2.064 Å | Marsh, R. E. <i>Acta Crystallogr., Sect. B</i> <b>2004</b> , <i>60</i> , 252. [Mg(H <sub>2</sub> O) <sub>6</sub> ](ClO <sub>4</sub> ) <sub>2</sub> ·C <sub>28</sub> H <sub>40</sub> O <sub>10</sub>                                                                                                                                                                            |
| VUYJIJ   | 2.064 Å | Fu, C.-H.; Zhou, X.; Yu, Q.; Bian, H.-D. <i>Acta Crystallogr., Sect. E</i> <b>2010</b> , <i>66</i> , m657.<br>[Mg(H <sub>2</sub> O) <sub>6</sub> ](C <sub>9</sub> H <sub>7</sub> N <sub>4</sub> O <sub>2</sub> S) <sub>2</sub>                                                                                                                                                 |
| YOHJAI   | 2.064 Å | Fortes, A. D.; Gutmann, M. J. <i>Acta Crystallogr., Sect. E</i> <b>2014</b> , <i>70</i> , 134. [Mg(H <sub>2</sub> O) <sub>6</sub> ]SeO <sub>4</sub> ·H <sub>2</sub> O                                                                                                                                                                                                          |
| 39218    | 2.065 Å | Avtamonova, N. V.; Trunov, V. K.; Makarevich, L. G. <i>Iz. Akad. Nauk SSSR, Neorg. Mater.</i> <b>1990</b> , <i>26</i> , 350-356. Rb <sub>2</sub> [Mg(H <sub>2</sub> O) <sub>6</sub> ]V <sub>10</sub> O <sub>28</sub> ·10H <sub>2</sub> O                                                                                                                                       |
| 236334   | 2.065 Å | Fortes, A. D.; Wood, I. G.; Gutmann, M. J. <i>Acta Crystallogr., Sect. C</i> <b>2013</b> , <i>69</i> , 324.<br>[Mg(H <sub>2</sub> O) <sub>6</sub> ]SO <sub>4</sub> ·5H <sub>2</sub> O                                                                                                                                                                                          |

|          |         |                                                                                                                                                                                                                                                                                                                                                             |
|----------|---------|-------------------------------------------------------------------------------------------------------------------------------------------------------------------------------------------------------------------------------------------------------------------------------------------------------------------------------------------------------------|
| 281563   | 2.065 Å | Massa, W.; Yakubovich, O. V.; Dimitrova, O. V. <i>Acta Crystallogr., Sect. C</i> <b>2003</b> , 59, i83.<br>Cs[Mg(H <sub>2</sub> O) <sub>6</sub> ]PO <sub>4</sub>                                                                                                                                                                                            |
| 710008   | 2.065 Å | Euler, H.; Barbier, B.; Meents, A.; Kirfel, A. Z. <i>Kristallogr. – New Cryst. Struct.</i> <b>2009</b> , 224, 360.<br>Tl <sub>2</sub> [Mg(H <sub>2</sub> O) <sub>6</sub> ](SeO <sub>4</sub> ) <sub>2</sub>                                                                                                                                                  |
| ADULUJ   | 2.065 Å | Xu, X. Lu, Y.; Hu, F.; Xu, L.; Shuai, Q. <i>J. Coord. Chem.</i> <b>2016</b> , 69, 3294.<br>[Mg(H <sub>2</sub> O) <sub>6</sub> ][FeC <sub>18</sub> H <sub>13</sub> O <sub>3</sub> ] <sub>2</sub> ·2H <sub>2</sub> O                                                                                                                                          |
| BEJYIZ   | 2.065 Å | Davies, H. O.; Park, J.-H.; Gillard, R. D. <i>Inorg. Chim. Acta</i> <b>2003</b> , 356, 69.<br>[Mg(H <sub>2</sub> O) <sub>6</sub> ][CuC <sub>4</sub> H <sub>8</sub> Cl <sub>2</sub> N <sub>2</sub> O <sub>4</sub> ]·H <sub>2</sub> O                                                                                                                         |
| GANVUO   | 2.065 Å | Qiao, C.-F.; Zhou, C.-S. <i>Acta Crystallogr., Sect. E</i> <b>2012</b> , 68, m173. [Mg(H <sub>2</sub> O) <sub>6</sub> ](C <sub>8</sub> H <sub>5</sub> N <sub>8</sub> ) <sub>2</sub> ·4H <sub>2</sub> O                                                                                                                                                      |
| HUYMIA   | 2.065 Å | Chen, Y.; Zhao, X; Gao, R.; Ruan, Z.; Lin, J.; Liu, S.; Tian, Z.; Chen, X. <i>J. Solid State Chem.</i> <b>2020</b> , 292, 121674. [Mg(H <sub>2</sub> O) <sub>6</sub> ](C <sub>3</sub> H <sub>5</sub> N <sub>2</sub> )[Tb(C <sub>7</sub> H <sub>3</sub> NO <sub>4</sub> ) <sub>3</sub> ]·0.5 C <sub>3</sub> H <sub>4</sub> N <sub>2</sub> ·4H <sub>2</sub> O |
| NOQNIS   | 2.065 Å | Elahi, S. M.; Rajasekharan, M. V. <i>Eur. J. Inorg. Chem.</i> <b>2015</b> , 171.<br>[Mg(H <sub>2</sub> O) <sub>6</sub> ] <sub>2</sub> [CeC <sub>14</sub> H <sub>12</sub> N <sub>3</sub> O <sub>12</sub> ]·[CeC <sub>14</sub> H <sub>12</sub> N <sub>3</sub> O <sub>11</sub> ]·2H <sub>2</sub> O                                                             |
| OMARID   | 2.065 Å | Cote, A. P.; Shimizu, G. K. H. <i>Chem. Eur. J.</i> <b>2003</b> , 9, 5361. [Mg(H <sub>2</sub> O) <sub>6</sub> ]C <sub>6</sub> H <sub>4</sub> O <sub>8</sub> S <sub>2</sub> ·3H <sub>2</sub> O                                                                                                                                                               |
| PUFYOF   | 2.065 Å | Wang, Y.-P.; Li, J.; Dong, H.-Z. <i>Acta Crystallogr., Sect. E</i> <b>2009</b> , 65, m1436.<br>[Mg(H <sub>2</sub> O) <sub>6</sub> ](C <sub>9</sub> H <sub>6</sub> N <sub>3</sub> O <sub>3</sub> S) <sub>2</sub> ·4H <sub>2</sub> O                                                                                                                          |
| QAJBOU   | 2.065 Å | Dai, J.; Chen, X.-Y. <i>Acta Crystallogr., Sect. E</i> <b>2011</b> , 67, m113. [Mg(H <sub>2</sub> O) <sub>6</sub> ]Br <sub>2</sub> ·2C <sub>6</sub> H <sub>5</sub> N <sub>5</sub>                                                                                                                                                                           |
| QOFVIS   | 2.065 Å | Zhang, R.; Zhang, Y.; Wang, J.; Ji, L.; Huang, X.; Wu, B. <i>Chin. J. Chem.</i> <b>2013</b> , 31, 679.<br>[Mg(H <sub>2</sub> O) <sub>6</sub> ](SO <sub>4</sub> ) <sub>2</sub> ·2(C <sub>24</sub> H <sub>30</sub> N <sub>10</sub> O <sub>3</sub> )                                                                                                           |
| RATRIN   | 2.065 Å | Marquis, D.; Greiving, H.; Desvergne, J.-P.; Lahrahar, N.; Marsau, P.; Hopf, H.; Bouas-Laurent, H.<br><i>Liebigs Ann.</i> <b>1997</b> , 97. [Mg(H <sub>2</sub> O) <sub>6</sub> ](ClO <sub>4</sub> ) <sub>2</sub> ·C <sub>28</sub> H <sub>40</sub> O <sub>10</sub>                                                                                           |
| RUMQUL   | 2.065 Å | Zasurskaya, L. A.; Pozdnyak, A. L.; Polynova, T. N.; ;Rybakov, V. B.; Porai-Koshits, M. A. <i>Zh. Neorg. Khim.</i> <b>1996</b> , 41, 1647. [Mg(H <sub>2</sub> O) <sub>6</sub> ][CoC <sub>10</sub> H <sub>12</sub> N <sub>2</sub> O <sub>8</sub> ] <sub>2</sub> ·4H <sub>2</sub> O                                                                           |
| ULAQEE   | 2.065 Å | Zheng, W.-N. <i>Acta Crystallogr., Sect. E</i> <b>2011</b> , 67, m344. [Mg(H <sub>2</sub> O) <sub>6</sub> ](C <sub>6</sub> H <sub>14</sub> N <sub>2</sub> )(SO <sub>4</sub> ) <sub>2</sub>                                                                                                                                                                  |
| XOSPOL   | 2.065 Å | Tai, X.-S.; Xu, J.; Feng, Y.-M.; Liang, Z.-P.; Wang, D.-Q. <i>Chin. J. Inorg. Chem.</i> <b>2009</b> , 25, 552.<br>[Mg(H <sub>2</sub> O) <sub>6</sub> ]C <sub>14</sub> H <sub>10</sub> N <sub>2</sub> O <sub>6</sub> S <sub>2</sub> ·2H <sub>2</sub> O                                                                                                       |
| ZEQWEX   | 2.065 Å | McCann, M.; Kaddock, K.; Cardin, C.; Convery, M.; Ferguson, G. <i>Polyhedron</i> <b>1995</b> , 14, 3655.<br>((C <sub>2</sub> H <sub>5</sub> ) <sub>3</sub> NH) <sub>2</sub> [Mg(H <sub>2</sub> O) <sub>6</sub> ][Mo <sub>8</sub> O <sub>26</sub> ]·2H <sub>2</sub> O                                                                                        |
| 16595    | 2.066 Å | Baur, W. H. <i>Acta Crystallogr.</i> <b>1964</b> , 17, 1361-1369. [Mg(H <sub>2</sub> O) <sub>6</sub> ]SO <sub>4</sub> ·H <sub>2</sub> O                                                                                                                                                                                                                     |
| 135097   | 2.066 Å | Srinivasan, B. R.; Deshpande, M. S. <i>Optics &amp; Laser Technol.</i> <b>2021</b> , 137, 106864. [Mg(H <sub>2</sub> O) <sub>6</sub> ]SO <sub>4</sub> ·H <sub>2</sub> O                                                                                                                                                                                     |
| CIRVAA01 | 2.066 Å | Vanhouteghem, F.; Lenstra, A. T. H.; Schweiss, P. <i>Acta Crystallogr. Sect. B</i> <b>1987</b> , 43, 523.<br>[Mg((H <sub>2</sub> O) <sub>6</sub> )(C <sub>4</sub> H <sub>3</sub> O <sub>4</sub> ) <sub>2</sub>                                                                                                                                              |

|          |         |                                                                                                                                                                                                                                                                                                                                                                        |
|----------|---------|------------------------------------------------------------------------------------------------------------------------------------------------------------------------------------------------------------------------------------------------------------------------------------------------------------------------------------------------------------------------|
| DERJOZ   | 2.066 Å | Matak-Vinkovic, D.; Vinkovic, M.; Dumic, M. <i>Croat. Chem. Acta</i> <b>1999</b> , 72, 541.<br>[Mg(H <sub>2</sub> O) <sub>6</sub> ](ClO <sub>4</sub> ) <sub>2</sub> ·3C <sub>10</sub> H <sub>14</sub> O <sub>4</sub>                                                                                                                                                   |
| FAHSAI   | 2.066 Å | Cole, L. B.; Holt, E. M. <i>J. Chem. Soc., Perkin Trans. 2</i> <b>1986</b> , 1997. [Mg(H <sub>2</sub> O) <sub>6</sub> ](C <sub>6</sub> H <sub>3</sub> N <sub>2</sub> O <sub>5</sub> ) <sub>2</sub> ·2H <sub>2</sub> O                                                                                                                                                  |
| FUSMEO01 | 2.066 Å | Meng, X.; Kang, K.; Liang, F.; Tang, J.; Yin, W.; Lin, Z.; Xia, M. <i>Z. Inorg. Chem. Front.</i> <b>2020</b> , 7, 3674.<br>[Mg(H <sub>2</sub> O) <sub>6</sub> ](C <sub>3</sub> H <sub>2</sub> N <sub>3</sub> O <sub>3</sub> ) <sub>2</sub> ·2H <sub>2</sub> O                                                                                                          |
| GAKPOY01 | 2.066 Å | Zhang, Z.; Gao, S.; Zhao, H.; Huo, L.; Zhao, J. <i>J. Nat. Sci. Heilongjiang Univ.</i> <b>2007</b> , 24, 678.<br>[Mg(H <sub>2</sub> O) <sub>6</sub> ](C <sub>7</sub> H <sub>6</sub> NO <sub>3</sub> ) <sub>2</sub> ·2H <sub>2</sub> O                                                                                                                                  |
| GATLUI   | 2.066 Å | Lee, H.; Lynch, V. M.; Cao G.; Mallouk, T. E. <i>Acta Crystallogr. Sect. C</i> <b>1988</b> , 44, 365.<br>((C <sub>2</sub> H <sub>5</sub> ) <sub>3</sub> NH) <sub>2</sub> [Mg(H <sub>2</sub> O) <sub>6</sub> ]((C <sub>6</sub> H <sub>5</sub> ) <sub>2</sub> CHPO <sub>3</sub> H) <sub>2</sub> ·2H <sub>2</sub> O                                                       |
| HAYZOZ   | 2.066 Å | Srinivasan, B. R.; Nather, K. T. D. C. <i>J. Chem. Sci. (Bangalore)</i> <b>2016</b> , 128, 1765. [Mg(H <sub>2</sub> O) <sub>6</sub> ](p-NO <sub>2</sub> C <sub>6</sub> H <sub>4</sub> CH <sub>2</sub> COO) <sub>2</sub> ·4H <sub>2</sub> O                                                                                                                             |
| IRUYEB02 | 2.066 Å | Huskic, I.; Friscic, T. <i>Cryst. Growth Des.</i> <b>2020</b> , 20, 525. [Mg((H <sub>2</sub> O) <sub>6</sub> )[FeNaC <sub>6</sub> H <sub>12</sub> ]·3H <sub>2</sub> O                                                                                                                                                                                                  |
| JAXYUF   | 2.066 Å | Safin, A.; Railliet, A. P.; Robeyns, K.; Mitoraj, M. P.; Kubisiak, P.; Sagan, F.; Garcia, Y. <i>New J. Chem.</i> <b>2017</b> , 41, 6210. [Mg((H <sub>2</sub> O) <sub>6</sub> )(C <sub>3</sub> H <sub>2</sub> N <sub>7</sub> ) <sub>2</sub>                                                                                                                             |
| NEMRUU   | 2.066 Å | Rekik, W.; Naili, H.; Mhiri, T.; Bataille, T. <i>Solid State Sci.</i> <b>2012</b> , 14, 1503.<br>[Mg(H <sub>2</sub> O) <sub>6</sub> ](CH <sub>2</sub> ) <sub>4</sub> (NH <sub>2</sub> ) <sub>2</sub> (SO <sub>4</sub> ) <sub>2</sub> ·6H <sub>2</sub> O                                                                                                                |
| NIQLIJ01 | 2.066 Å | Tepavitcharova, S.; Rabadjieva, D.; Havlicek, D.; Nemecek, I.; Vojtisek, P.; Plocek, J.; Koleva, Z. <i>J. Mol. Struct.</i> <b>2012</b> , 1018, 113. [Mg(H <sub>2</sub> O) <sub>6</sub> ][Mg(H <sub>2</sub> O) <sub>4</sub> (OCOCH <sub>2</sub> NH <sub>3</sub> ) <sub>2</sub> ](SO <sub>4</sub> ) <sub>2</sub>                                                         |
| OBENUH   | 2.066 Å | Huang, Y.-Q.; Cheng, H.-D.; Guo, B.-L.; Wan, Y.; Chen, H.-Y.; Li, Y.-K.; Zhao, Y. <i>Inorg. Chim. Acta</i> <b>2014</b> , 421, 318. [Mg(H <sub>2</sub> O) <sub>6</sub> ](1-CH <sub>2</sub> COO-4-COO-C <sub>5</sub> H <sub>4</sub> N) <sub>2</sub> ·2H <sub>2</sub> O                                                                                                   |
| OKUZIF   | 2.066 Å | Xiaojun, W.; Jin, S.; Li, L.; Chen, S.; Shu, Q. <i>Z. Kristallogr. - New Cryst. Struct.</i> <b>2016</b> , 231, 305.<br>[Mg(H <sub>2</sub> O) <sub>6</sub> ](C <sub>2</sub> N <sub>8</sub> O <sub>2</sub> ) <sub>2</sub>                                                                                                                                                |
| QAKKIA01 | 2.066 Å | Shang, W.; Schlam, R. F.; Hickey, M. B.; Zhou, J.; Wheeler, K. A.; de Delgado, G. C. D.; Chen, C.-H.; Snider, B. B.; Foxman, B. M. <i>Cryst. Growth Des.</i> <b>2021</b> , 21, 663. [Mg(H <sub>2</sub> O) <sub>6</sub> ](CH <sub>3</sub> (CH) <sub>2</sub> COO) <sub>2</sub> ·2H <sub>2</sub> O                                                                        |
| QAKMUO   | 2.066 Å | Shang, W.; Schlam, R. F.; Hickey, M. B.; Zhou, J.; Wheeler, K. A.; de Delgado, G. C. D.; Chen, C.-H.; Snider, B. B.; Foxman, B. M. <i>Cryst. Growth Des.</i> <b>2021</b> , 21, 663.<br>[Mg(H <sub>2</sub> O) <sub>6</sub> ](CH <sub>3</sub> (CH) <sub>2</sub> COO) <sub>1.32</sub> (C <sub>8</sub> H <sub>10</sub> O <sub>4</sub> ) <sub>0.34</sub> ·2H <sub>2</sub> O |
| QERJIH   | 2.066 Å | Zhang, X.-F.; Gao, S.; Huo, L.-H.; Zhao, H. <i>Acta Crystallogr., Sect. E</i> <b>2007</b> , 63, m1664.<br>[Mg(H <sub>2</sub> O) <sub>6</sub> ](C <sub>5</sub> H <sub>3</sub> N <sub>2</sub> O <sub>4</sub> ) <sub>2</sub> ·2H <sub>2</sub> O                                                                                                                           |
| TOXDMG   | 2.066 Å | Neuman, M. A.; Steinrt, E. C.; van Remoortere, F. P.; Boer, F. P. <i>Inorg. Chem.</i> <b>1975</b> , 14, 734.<br>[Mg(H <sub>2</sub> O) <sub>6</sub> ]Cl <sub>2</sub> ·C <sub>8</sub> H <sub>16</sub> O <sub>4</sub>                                                                                                                                                     |
| ULAQEE01 | 2.066 Å | Rekik, W.; Naili, H.; Mhiri, T.; Bataille, T. <i>Solid State Sci.</i> <b>2012</b> , 14, 1503. [Mg(H <sub>2</sub> O) <sub>6</sub> ](C <sub>6</sub> H <sub>14</sub> N <sub>2</sub> )(SO <sub>4</sub> ) <sub>2</sub>                                                                                                                                                      |

|          |         |                                                                                                                                                                                                                                                                                                                    |
|----------|---------|--------------------------------------------------------------------------------------------------------------------------------------------------------------------------------------------------------------------------------------------------------------------------------------------------------------------|
| UDIVIN   | 2.066 Å | Srinivasan, B. R.; Sawant, J. V.; Nather, C.; Bensch, W. <i>J. Chem. Sci. (Bangalore)</i> <b>2007</b> , <i>119</i> , 243. [Mg(H <sub>2</sub> O) <sub>6</sub> ](p-NO <sub>2</sub> C <sub>6</sub> H <sub>4</sub> COO) <sub>2</sub> ·2H <sub>2</sub> O                                                                |
| ZEGJON   | 2.066 Å | Quarez, E.; Deunf, E.; Cadiou, V.; Gutel, T.; Boucher, F.; Guyomard, D.; Dolhem, F.; Poizot, P. <i>CrystEngComm</i> <b>2017</b> , <i>19</i> , 6787. [Mg(H <sub>2</sub> O) <sub>6</sub> ](C <sub>20</sub> H <sub>14</sub> N <sub>2</sub> O <sub>2</sub> )·2.8H <sub>2</sub> O                                       |
| 2917     | 2.067 Å | Suesse, P. <i>Z. Kristallogr., Kristallgeom., Kristallphys., Kristallchem.</i> , <b>1972</b> , <i>135</i> , 34-55. [Mg(H <sub>2</sub> O) <sub>6</sub> ]Fe <sub>4</sub> ((OH) <sub>2</sub> (SO <sub>4</sub> ) <sub>6</sub> )·14H <sub>2</sub> O                                                                     |
| 32526    | 2.067 Å | Takagi, S.; Mathew, M.; Brown, W. E. <i>Acta Crystallogr., Sect B</i> <b>1982</b> , <i>38</i> , 44-50. K[Mg(H <sub>2</sub> O) <sub>6</sub> ]H(AsO <sub>4</sub> ) <sub>2</sub> ·3H <sub>2</sub> O                                                                                                                   |
| 35665    | 2.067 Å | Elerman, Y.; Bats, J. W.; Fuess, H. <i>Acta Crystallogr., Sect. C</i> <b>1983</b> , <i>39</i> , 515-518. [Mg(H <sub>2</sub> O) <sub>6</sub> ]S <sub>2</sub> O <sub>3</sub>                                                                                                                                         |
| 252174   | 2.067 Å | Piro, O. E.; Echeverria, G. A.; Gonzalez-Baro, A. C.; Baran, E. J. <i>Phys. Chem. Miner.</i> <b>2016</b> , <i>43</i> , 287. Na[Mg(H <sub>2</sub> O) <sub>6</sub> ][Fe(C <sub>2</sub> O <sub>4</sub> ) <sub>3</sub> ]·3H <sub>2</sub> O                                                                             |
| 252896   | 2.067 Å | Huskic, I.; Pekov, I. V.; Krivovichev, S. V.; Friscic, T. <i>Sci. Adv.</i> <b>2016</b> , <i>2</i> , 1600621. Na[Mg(H <sub>2</sub> O) <sub>6</sub> ][Fe <sub>0.76</sub> Al <sub>0.24</sub> (C <sub>2</sub> O <sub>4</sub> ) <sub>3</sub> ]·3H <sub>2</sub> O                                                        |
| 433347   | 2.067 Å | Shen, C.; Mei, D.; Sun, C.; Liu, Y.; Wu, Y. <i>Z. Anorg. Allg. Chem.</i> <b>2017</b> , <i>643</i> , 1082. Cs <sub>3</sub> [Mg(H <sub>2</sub> O) <sub>6</sub> ] <sub>3</sub> (SeO <sub>4</sub> ) <sub>3</sub>                                                                                                       |
| ESIDES   | 2.067 Å | Clegg, W.; Nichol, G. S. CCDC deposition number 2080578, <b>2021</b> . [Mg(H <sub>2</sub> O) <sub>6</sub> ](C <sub>4</sub> H <sub>3</sub> N <sub>2</sub> O <sub>3</sub> ) <sub>2</sub> ·3H <sub>2</sub> O                                                                                                          |
| FUSMEO   | 2.067 Å | Reckeweg, O.; Lissner, F.; Blaschkowski, B.; Gross, P.; Hoppe, H. A.; Schleid, T. <i>Z. Anorg. Allg. Chem.</i> <b>2020</b> , <i>646</i> , 1252. [Mg(H <sub>2</sub> O) <sub>6</sub> ](C <sub>3</sub> H <sub>2</sub> N <sub>3</sub> O <sub>3</sub> ) <sub>2</sub> ·2H <sub>2</sub> O                                 |
| GUHHOG   | 2.067 Å | Arranz Mascaros, P.; Cobo Domingo, J.; Godino, Salido, M.; Gutierrez Valero, M. D.; Lopez Garzon, R.; Low, J. N. <i>Acta Crystallogr. Sect. C</i> <b>2000</b> , <i>56</i> , e4. [Mg(H <sub>2</sub> O) <sub>6</sub> ](C <sub>7</sub> H <sub>8</sub> N <sub>5</sub> O <sub>4</sub> ) <sub>2</sub> ·2H <sub>2</sub> O |
| LEFLOB   | 2.067 Å | Lorenz, V.; Liebing, P.; Müller, M.; Hilfert, L.; Feneberg, M.; Kluth, E.; Kuhling, M.; Buchner, M. R.; Goldhahn, R.; Edelmann, F. T. <i>Dalton Trans.</i> <b>2022</b> , <i>51</i> , 7975. [Mg(H <sub>2</sub> O) <sub>6</sub> ](C <sub>6</sub> H <sub>6</sub> N <sub>3</sub> O <sub>4</sub> ) <sub>2</sub>         |
| ONIJIH   | 2.067 Å | Gruhne, M. S.; Lommel, M.; Wurzenberger, M. H. H.; Klapotke, T. M.; Stierstorfer, J. <i>Inorg. Chem.</i> <b>2021</b> , <i>60</i> , 4816. [Mg(H <sub>2</sub> O) <sub>6</sub> ](O <sub>2</sub> NN(CH <sub>2</sub> ) <sub>2</sub> NNO <sub>2</sub> )                                                                  |
| OXESUH   | 2.067 Å | Piro, O. E.; Echeverria, G. A.; Gonzalez-Baro, A. C.; Baran, E. J. <i>J. Coord. Chem.</i> <b>2015</b> , <i>68</i> , 3776. [Mg(H <sub>2</sub> O) <sub>6</sub> ][NaCrC <sub>6</sub> O <sub>12</sub> ]·3H <sub>2</sub> O                                                                                              |
| NIQLIJ02 | 2.067 Å | Oguey, S.; Jacquier, Y.; Neels, A.; Stöckli-Evans, H. CCDC deposition number 936398, <b>2013</b> .                                                                                                                                                                                                                 |
| RAKYOR   | 2.067 Å | Cai, J.; Chen, C.-H.; Liao, C.-Z.; Feng, X.-L.; Chen, X.-M. <i>Acta Crystallogr., Sect. B</i> <b>2001</b> , <i>57</i> , 520. [Mg(H <sub>2</sub> O) <sub>6</sub> ](C <sub>10</sub> H <sub>6</sub> O <sub>6</sub> S <sub>2</sub> ) <sub>2</sub> ·2H <sub>2</sub> O                                                   |
| RIRGEF   | 2.067 Å | Tai, X.-S.; Yin, J.; Hao, M.-Y. <i>Z. Kristallogr. - New Cryst. Struct.</i> <b>2007</b> , <i>222</i> , 231. [Mg(H <sub>2</sub> O) <sub>6</sub> ](ClO <sub>4</sub> ) <sub>2</sub> ·2C <sub>10</sub> H <sub>16</sub> ·2H <sub>2</sub> O                                                                              |
| RODXOA   | 2.067 Å | Huskic, I.; Novendra, N.; Lim, D.-W.; Topic, F.; Titi, H. M.; Pekov, I. S. V.; Krivovichev, S. V.; Navrotsky, A.; Kitagawa, H.; Friscic, T. <i>Chem. Sci.</i> <b>2019</b> , <i>10</i> , 4923. [Mg(H <sub>2</sub> O) <sub>6</sub> ][FeNaC <sub>6</sub> H <sub>12</sub> ]                                            |

|        |         |                                                                                                                                                                                                                                                                                                                                                                             |
|--------|---------|-----------------------------------------------------------------------------------------------------------------------------------------------------------------------------------------------------------------------------------------------------------------------------------------------------------------------------------------------------------------------------|
| SIMZUJ | 2.067 Å | Bach, I.; Kumberger, O.; Schmidbaur, H. <i>Chem. Ber.</i> <b>1990</b> , <i>123</i> , 2267. [Mg(H <sub>2</sub> O) <sub>6</sub> ](C <sub>5</sub> H <sub>3</sub> N <sub>2</sub> O <sub>4</sub> ) <sub>2</sub> ·2H <sub>2</sub> O                                                                                                                                               |
| TEHJUN | 2.067 Å | Draskovic, N. S.; Radanovic, D. D.; Rychlewska, U.; Warzajtis, B.; Stanojevic, I. M.; Djuran, M. I. <i>Polyhedron</i> <b>2012</b> , <i>43</i> , 185. [Mg(H <sub>2</sub> O) <sub>6</sub> ][NiC <sub>13</sub> H <sub>18</sub> N <sub>2</sub> O <sub>8</sub> ]·4H <sub>2</sub> O                                                                                               |
| UMANEB | 2.067 Å | Dalrymple, S. A.; Shimizu, G. K. H. <i>Supramol. Chem.</i> <b>2003</b> , <i>15</i> , 591. [Mg(H <sub>2</sub> O) <sub>6</sub> ] <sub>3</sub> C <sub>6</sub> (CH <sub>2</sub> SO <sub>3</sub> ) <sub>6</sub> ·3(CH <sub>3</sub> ) <sub>2</sub> CO                                                                                                                             |
| UNEWEP | 2.067 Å | Dhungana, S.; White, P. S.; Crumbliss, A. L. <i>J. Am. Chem. Soc.</i> <b>2003</b> , <i>125</i> , 14760. [Mg(H <sub>2</sub> O) <sub>6</sub> ][FeC <sub>25</sub> H <sub>46</sub> N <sub>6</sub> O <sub>8</sub> ] <sub>2</sub> (ClO <sub>4</sub> ) <sub>4</sub> ·2C <sub>16</sub> H <sub>24</sub> O <sub>8</sub> ·C <sub>2</sub> H <sub>5</sub> OH·8H <sub>2</sub> O           |
| VILLIM | 2.067 Å | Mastropietro, T. F.; Armentano, D. Marino, N.; De Munno, G. <i>Polyhedron</i> <b>2007</b> , <i>27</i> , 4945. [Mg(H <sub>2</sub> O) <sub>6</sub> ](ClO <sub>4</sub> ) <sub>2</sub> ·2C <sub>5</sub> H <sub>5</sub> N <sub>5</sub>                                                                                                                                           |
| YIKLAH | 2.067 Å | Hennings, E.; Schmidt, H.; Voigt, W. <i>Acta Crystallogr., Sect. C</i> <b>2013</b> , <i>69</i> , 1292. [Mg(H <sub>2</sub> O) <sub>6</sub> ]Br <sub>2</sub>                                                                                                                                                                                                                  |
| CIVBUG | 2.068 Å | Shi, J.; Wang, Y.-C.; Wang, Q.-Y.; Zhang, Z.-T. <i>Inorg. Chim. Acta</i> <b>2014</b> , <i>409</i> , 259. [Mg(H <sub>2</sub> O) <sub>6</sub> ](C <sub>17</sub> H <sub>12</sub> BrO <sub>9</sub> S) <sub>2</sub> ·2H <sub>2</sub> O                                                                                                                                           |
| CUPRUB | 2.068 Å | Kennedy, A. R.; Andrikopoulos, P. C.; Arlin, J.-B.; Armstrong, D. R.; Duxbury, N.; Graham, D. V.; Kirkhouse, J. B. A. <i>Chem. Eur. J.</i> <b>2009</b> , <i>15</i> , 9494. [Mg(H <sub>2</sub> O) <sub>6</sub> ](C <sub>17</sub> H <sub>20</sub> N <sub>3</sub> O <sub>5</sub> S) <sub>2</sub> ·2.63H <sub>2</sub> O                                                         |
| DEHMIN | 2.068 Å | Kennedy, A. R.; Kirkhouse, J. B. A.; Whyte, L. <i>Inorg. Chem.</i> <b>2006</b> , <i>45</i> , 2965. [Mg(H <sub>2</sub> O) <sub>6</sub> ]C <sub>16</sub> H <sub>10</sub> N <sub>2</sub> O <sub>7</sub> S <sub>2</sub> ·3.33H <sub>2</sub> O                                                                                                                                   |
| EXUBOO | 2.068 Å | Gao, F.; Meng, B.-H.; Wei, Y.-B. <i>Acta Crystallogr., Sect. C</i> <b>2004</b> , <i>60</i> , m360. [Mg(H <sub>2</sub> O) <sub>6</sub> ] <sub>2</sub> [MgC <sub>16</sub> H <sub>22</sub> ClN <sub>2</sub> O <sub>13</sub> ]·20H <sub>2</sub> O                                                                                                                               |
| GOBSIA | 2.068 Å | Morgant, G.; d'Angelo, J.; Desmaele, D.; Dichi, E.; Sghaier, M.; Fraisse, B.; Retailleau, P.; Brumas, V.; Fiallo, M. M. L.; Tomas, A. <i>Polyhedron</i> <b>2008</b> , <i>27</i> , 2097. [Mg(H <sub>2</sub> O) <sub>6</sub> ](C <sub>7</sub> H <sub>4</sub> NO <sub>5</sub> ) <sub>2</sub>                                                                                   |
| IJIZIL | 2.068 Å | Dai, J.; Chen, X.-Y. <i>Acta Crystallogr., Sect. E</i> <b>2011</b> , <i>67</i> , m171. [Mg(H <sub>2</sub> O) <sub>6</sub> ]Cl <sub>2</sub> ·(C <sub>6</sub> H <sub>5</sub> N <sub>5</sub> ) <sub>2</sub>                                                                                                                                                                    |
| MEBCAB | 2.068 Å | Chen, X.; Wang, S.; Chen, Y.; Hu, Y.; Zhang, C.; Guo, Z.; Ma, H. <i>Appl. Organometal. Chem.</i> <b>2022</b> , <i>38</i> , e6497. [Mg(H <sub>2</sub> O) <sub>6</sub> ](C <sub>4</sub> H <sub>4</sub> N <sub>12</sub> O <sub>4</sub> ) <sub>2</sub> ·H <sub>2</sub> O                                                                                                        |
| OKUTUL | 2.068 Å | Piro, O. E.; Echeverria, G. A.; Gonzalez-Baro, A. C.; Baran, E. J. <i>Phys. Chem. Minerals</i> <b>2016</b> , <i>43</i> , 287. [Mg(H <sub>2</sub> O) <sub>6</sub> ][FeNaC <sub>6</sub> O <sub>12</sub> ]·3H <sub>2</sub> O                                                                                                                                                   |
| NIMXOX | 2.068 Å | Radanovic, D. D.; Rychlewska, U.; Warzajtis, B.; Cvijovic, M. S.; Dimitrijevic, M. D.; Djuran, M. I. <i>Polyhedron</i> <b>2007</b> , <i>26</i> , 4799. [Mg(H <sub>2</sub> O) <sub>6</sub> ][CoC <sub>12</sub> H <sub>16</sub> N <sub>2</sub> O <sub>8</sub> ]·3H <sub>2</sub> O                                                                                             |
| PONGUV | 2.068 Å | Miminoshvili, E. B.; Miminoshvili, K. E.; Beridze, L. A. <i>Zh. Strukt. Khim.</i> <b>2008</b> , <i>49</i> , 787. [Mg(H <sub>2</sub> O) <sub>6</sub> ](C <sub>12</sub> H <sub>13</sub> N <sub>4</sub> O <sub>4</sub> S) <sub>2</sub> ·5H <sub>2</sub> O                                                                                                                      |
| QAKKOG | 2.068 Å | Shang, W.; Schlam, R. F.; Hickey, M. B.; Zhou, J.; Wheeler, K. A.; de Delgado, G. C. D.; Chen, C.-H.; Snider, B. B.; Foxman, B. M. <i>Cryst. Growth Des.</i> <b>2021</b> , <i>21</i> , 663. [Mg(H <sub>2</sub> O) <sub>6</sub> ](CH <sub>3</sub> (CH) <sub>2</sub> COO) <sub>1.72</sub> (C <sub>8</sub> H <sub>10</sub> O <sub>4</sub> ) <sub>0.14</sub> ·2H <sub>2</sub> O |

|          |         |                                                                                                                                                                                                                                                                                                              |
|----------|---------|--------------------------------------------------------------------------------------------------------------------------------------------------------------------------------------------------------------------------------------------------------------------------------------------------------------|
| QORNOD   | 2.068 Å | Singh, R.; Kociok-Kohn, G.; Jassal, A. K.; Singh, L. <i>Polyhedron</i> <b>2020</b> , <i>175</i> , 114200. [Mg(H <sub>2</sub> O) <sub>6</sub> ](C <sub>3</sub> H <sub>7</sub> SO <sub>3</sub> ) <sub>2</sub>                                                                                                  |
| QORNOD   | 2.068 Å | Singh, R.; Kociok-Kohn, G.; Jassal, A. K.; Singh, L. <i>Polyhedron</i> <b>2019</b> , <i>175</i> , 114200. [Mg((H <sub>2</sub> O) <sub>6</sub> )(C <sub>3</sub> H <sub>7</sub> SO <sub>3</sub> ) <sub>2</sub>                                                                                                 |
| UDAPIB   | 2.068   | Smith, G.; Wermuth, U. D. <i>Acta Crystallog., Sect. C</i> <b>2017</b> , <i>73</i> , 61. [Mg(H <sub>2</sub> O) <sub>6</sub> ](H <sub>2</sub> NC <sub>6</sub> H <sub>4</sub> AsO <sub>3</sub> ) <sub>2</sub> ·4H <sub>2</sub> O                                                                               |
| TAHKUJ   | 2.068 Å | Morris, J. E.; Squattrito, P. J.; Kirschbaum, K.; Pinkerton, A. A. <i>J. Chem. Cryst.</i> <b>2003</b> , <i>33</i> , 307. [Mg(H <sub>2</sub> O) <sub>6</sub> ](C <sub>10</sub> H <sub>8</sub> NO <sub>3</sub> S) <sub>2</sub> ·2H <sub>2</sub> O                                                              |
| TUCGII   | 2.068 Å | Miletic, V. D.; Meetsma, A.; van Koningsbruggen, P. J.; Matovic, Z. D. <i>Inorg. Chem. Commun.</i> <b>2009</b> , <i>12</i> , 720. [Mg(H <sub>2</sub> O) <sub>6</sub> ][NiC <sub>11</sub> H <sub>14</sub> N <sub>2</sub> O <sub>8</sub> ]·2H <sub>2</sub> O                                                   |
| XITDUZ   | 2.068 Å | Wiesbrock, F.; Schier, A.; Schmidbaur, H. <i>Z. Naturforsch., Teil B</i> <b>2002</b> , <i>57</i> , 251. [Mg(H <sub>2</sub> O) <sub>6</sub> ](C <sub>7</sub> H <sub>6</sub> NO <sub>2</sub> ) <sub>2</sub> ·2H <sub>2</sub> O                                                                                 |
| 25713    | 2.069 Å | Margulis, T. N.; Templeton, D. H. <i>Z. Kristallogr., Kristallgeom., Kristallphys., Kristallchem.</i> <b>1962</b> , <i>117</i> , 344-357. (NH <sub>4</sub> ) <sub>2</sub> [Mg(H <sub>2</sub> O) <sub>6</sub> ](SO <sub>4</sub> ) <sub>2</sub>                                                                |
| 34705    | 2.069 Å | Baggio, S.; Amzel, L. M.; Becka, L. N. <i>Acta Crystallogr., Sect. B</i> <b>1969</b> , <i>25</i> , 2650-2653. [Mg(H <sub>2</sub> O) <sub>6</sub> ]S <sub>2</sub> O <sub>3</sub>                                                                                                                              |
| 35664    | 2.069 Å | Elerman, Y.; Bats, J. W.; Fuess, H. <i>Acta Crystallogr., Sect. C</i> <b>1983</b> , <i>39</i> , 515-518. [Mg(H <sub>2</sub> O) <sub>6</sub> ]S <sub>2</sub> O <sub>3</sub>                                                                                                                                   |
| AWIXEM   | 2.069 Å | Kalinowska, M.; Golebiewska, E.; Mazur, L.; Lewandowska, H.; Pruszyński, M.; Swiderski, G.; Wyrwas, M.; Pawluczuk, N.; Lewandowski, W. <i>Materials</i> <b>2021</b> , <i>14</i> , 3236. [Mg(H <sub>2</sub> O) <sub>6</sub> ](C <sub>10</sub> H <sub>9</sub> O <sub>2</sub> ) <sub>2</sub> ·6H <sub>2</sub> O |
| IRUYEB   | 2.069 Å | Huskic, I.; Pekov, I. V.; Krivovichev, S. V.; Friscic, T. <i>Sci. Adv.</i> <b>2016</b> , <i>2</i> , e1600621. [Mg(H <sub>2</sub> O) <sub>6</sub> ][FeNaC <sub>6</sub> O <sub>12</sub> ]·3H <sub>2</sub> O                                                                                                    |
| OKUTUL03 | 2.069 Å | Huskic, I.; Novendra, N.; Lim, D.-W.; Topic, F.; Titi, H. M.; Pekov, I. S. V.; Krivovichev, S. V.; Navrotsky, A.; Kitagawa, H.; Friscic, T. <i>Chem. Sci.</i> <b>2019</b> , <i>10</i> , 4923. [Mg((H <sub>2</sub> O) <sub>6</sub> )[FeNaC <sub>6</sub> H <sub>12</sub> ]·3H <sub>2</sub> O                   |
| QAJYEJ   | 2.069 Å | Shang, W.; Schlam, R. F.; Hickey, M. B.; Zhou, J.; Wheeler, K. A.; de Delgado, G. C. D.; Chen, C.-H.; Snider, B. B.; Foxman, B. M. <i>Cryst. Growth Des.</i> <b>2021</b> , <i>21</i> , 663. [Mg(H <sub>2</sub> O) <sub>6</sub> ](CH <sub>3</sub> (CH) <sub>2</sub> COO) <sub>2</sub> ·2H <sub>2</sub> O      |
| QAJYEJ01 | 2.069 Å | Shang, W.; Schlam, R. F.; Hickey, M. B.; Zhou, J.; Wheeler, K. A.; de Delgado, G. C. D.; Chen, C.-H.; Snider, B. B.; Foxman, B. M. <i>Cryst. Growth Des.</i> <b>2021</b> , <i>21</i> , 663. [Mg(H <sub>2</sub> O) <sub>6</sub> ](CH <sub>3</sub> (CH) <sub>2</sub> COO) <sub>2</sub> ·2H <sub>2</sub> O      |
| ULULUK   | 2.069 Å | Skieneh, J.; Najafabadi, B. K.; Horne, S.; Rohani, S. <i>Molecules</i> <b>2016</b> , <i>21</i> , 544. Mg(H <sub>2</sub> O) <sub>6</sub> [MgC <sub>51</sub> H <sub>54</sub> N <sub>9</sub> O <sub>9</sub> S <sub>3</sub> ] <sub>2</sub> ·6C <sub>4</sub> H <sub>9</sub> OH·6H <sub>2</sub> O                  |
| XAGVAF   | 2.069 Å | Piro, O. E.; Echeverria, G. A.; Parajon-Costa, B. S.; Baran, E. J. <i>Z. Naturforsch., Teil B</i> <b>2016</b> , <i>71</i> , 51. [Mg(H <sub>2</sub> O) <sub>6</sub> ](C <sub>4</sub> H <sub>4</sub> NO <sub>4</sub> S) <sub>2</sub>                                                                           |
| YIZWUZ   | 2.069 Å | Suh, J.-S.; Shin, J.-Y.; Yoon, C.; Lee, K.-W.; Suh, I.-H.; Lee, J.-H.; Ryu, B.-Y.; Lim, S.-S. <i>Bull. Korean Chem. Soc.</i> <b>1994</b> , <i>15</i> , 245. [Mg(H <sub>2</sub> O) <sub>6</sub> ][CrNaC <sub>6</sub> O <sub>12</sub> ]·4H <sub>2</sub> O                                                      |
| 588      | 2.070 Å | Yamashita, K.; Komatsu, K.; Hattori, T.; Machida, S.; Kagi, H. <i>Acta Crystallogr., Sect. C</i> <b>2019</b> , <i>75</i> , 1605. [Mg(D <sub>2</sub> O) <sub>5.76</sub> (H <sub>2</sub> O) <sub>0.24</sub> ]Cl <sub>2</sub>                                                                                   |

|          |         |                                                                                                                                                                                                                                                                                                            |
|----------|---------|------------------------------------------------------------------------------------------------------------------------------------------------------------------------------------------------------------------------------------------------------------------------------------------------------------|
| 26368    | 2.070 Å | Ledesert, M.; Monier, J.-C. <i>Acta Crystallogr. Sect. B</i> <b>1981</b> , 37, 652-654. Cd[Mg(H <sub>2</sub> O) <sub>6</sub> ] <sub>2</sub> Cl <sub>6</sub>                                                                                                                                                |
| 29384    | 2.070 Å | Calleri, M.; Gavetti, A.; Ivaldi, G.; Rubbo, M. <i>Acta Crystallogr. Sect. B</i> <b>1984</b> , 40, 218-222.<br>[Mg(H <sub>2</sub> O) <sub>6</sub> ] <sub>2</sub> SO <sub>4</sub> ·H <sub>2</sub> O                                                                                                         |
| 32101    | 2.070 Å | Mayer, H.; Mereiter, K. <i>Tschermaks Mineralogische und Petrographische Mitteilungen</i> <b>1986</b> , 35, 133-146. [Mg(H <sub>2</sub> O) <sub>6</sub> ] <sub>2</sub> (UO <sub>2</sub> (CO <sub>3</sub> ) <sub>3</sub> )·6H <sub>2</sub> O                                                                |
| 39217    | 2.070 Å | Avtamonova, N. V.; Trunov, V. K.; Makarevich, L. G. <i>Iz. Akad. Nauk SSSR, Neorg. Mater.</i> <b>1990</b> , 26, 350-356. (NH <sub>4</sub> ) <sub>2</sub> [Mg(H <sub>2</sub> O) <sub>6</sub> ] <sub>2</sub> V <sub>10</sub> O <sub>28</sub> ·10H <sub>2</sub> O                                             |
| 252175   | 2.070 Å | Piro, O. E.; Echeverria, G. A.; Gonzalez-Baro, A. C.; Baran, E. J. <i>Phys. Chem. Miner.</i> <b>2016</b> , 43, 287. Na[Mg(H <sub>2</sub> O) <sub>6</sub> ][Fe <sub>0.45</sub> Al <sub>0.55</sub> (C <sub>2</sub> O <sub>4</sub> ) <sub>3</sub> ]·3H <sub>2</sub> O                                         |
| 409746   | 2.070 Å | Euler, H.; Barbier, B.; Meents, A.; Kirfel, A. <i>Z. Kristallogr. – New Cryst. Struct.</i> <b>2003</b> , 218, 409. Cs <sub>2</sub> [Mg(H <sub>2</sub> O) <sub>6</sub> ](SeO <sub>4</sub> ) <sub>2</sub>                                                                                                    |
| 419834   | 2.070 Å | Weil, M. <i>Cryst. Res. Technol.</i> <b>2008</b> , 43, 1286. Rb[Mg(H <sub>2</sub> O) <sub>6</sub> ] <sub>2</sub> PO <sub>4</sub>                                                                                                                                                                           |
| BUVRAM   | 2.070 Å | Fischer, N. V.; Inayat, A.; Schwieger, W.; Burzlaff, N. <i>J. Coord. Chem.</i> <b>2010</b> , 63, 2831. [Mg(H <sub>2</sub> O) <sub>6</sub> ](C <sub>5</sub> H <sub>4</sub> N <sub>3</sub> O <sub>2</sub> ) <sub>2</sub>                                                                                     |
| CADZEO   | 2.070 Å | Fischer, N.; Klapotke, T. M.; Peters, K.; Rusan, M.; Stierstorfer, J. <i>Z. Anorg. Allg. Chem.</i> <b>2011</b> , 637, 1693. [Mg(H <sub>2</sub> O) <sub>6</sub> ] <sub>2</sub> C <sub>2</sub> N <sub>8</sub> ·3H <sub>2</sub> O                                                                             |
| DAVVON   | 2.070 Å | Rychlewska, U.; Guresic, D. M.; Warzajtis, B.; Radanovic, D. D.; Djuran, M. I. <i>Polyhedron</i> <b>2005</b> , 24, 2009. [Mg(H <sub>2</sub> O) <sub>6</sub> ][CdC <sub>11</sub> H <sub>16</sub> N <sub>2</sub> O <sub>9</sub> ]·2H <sub>2</sub> O                                                          |
| DELBIH   | 2.070 Å | Sieranski, T.; Kruszynski, R. <i>J. Thermal Anal. Calorimetry</i> <b>2012</b> , 109, 141. [Mg(H <sub>2</sub> O) <sub>6</sub> ] <sub>2</sub> SO <sub>4</sub> ·2C <sub>6</sub> H <sub>12</sub> N <sub>4</sub> ·5H <sub>2</sub> O                                                                             |
| GUCSUU   | 2.070 Å | Sene, S.; Begu, S.; Gervais, C.; Renaudin, G.; Mesbah, A.; Smith, M. E.; Hubert Mutin, P.; van der Lee, A.; Nedelec, J.-M.; Bonhomme, C.; Laurencin, D. <i>Chem. Mater.</i> <b>2015</b> , 27, 1242. [Mg(H <sub>2</sub> O) <sub>6</sub> ][C <sub>7</sub> H <sub>8</sub> BO <sub>3</sub> ]·4H <sub>2</sub> O |
| NIQLIJ   | 2.070 Å | Elayaraja, K.; Parthiban, S. P.; Ramalingom, S.; Bocelli, G.; Kalkura, S. N. <i>Acta Crystallogr., Sect. E</i> <b>2007</b> , 63, m2901. [Mg(H <sub>2</sub> O) <sub>6</sub> ](C <sub>10</sub> H <sub>16</sub> O <sub>4</sub> S) <sub>2</sub>                                                                |
| OKUVAT03 | 2.070 Å | Piro, O. E.; Echeverria, G. A.; Gonzalez-Baro, A. C.; Baran, E. J. <i>J. Coord. Chem.</i> <b>2015</b> , 68, 3776. [Mg(H <sub>2</sub> O) <sub>6</sub> ][NaAlC <sub>6</sub> O <sub>12</sub> ]·3H <sub>2</sub> O                                                                                              |
| QAKKIA   | 2.070 Å | Shang, W.; Schlam, R. F.; Hickey, M. B.; Zhou, J.; Wheeler, K. A.; de Delgado, G. C. D.; Chen, C.-H.; Snider, B. B.; Foxman, B. M. <i>Cryst. Growth Des.</i> <b>2021</b> , 21, 663. [Mg(H <sub>2</sub> O) <sub>6</sub> ](CH <sub>3</sub> (CH) <sub>2</sub> COO) <sub>2</sub> ·2H <sub>2</sub> O            |
| QOGYUI   | 2.070 Å | Zhang, X.-B.; Ren, Y.-H.; Li, W.; Zhao, F.-Q.; Wang, B.-Z.; Song, J.-R. <i>Chem. Res. Chin. Univ.</i> <b>2013</b> , 29, 627. [Mg(H <sub>2</sub> O) <sub>6</sub> ](C <sub>4</sub> H <sub>2</sub> N <sub>14</sub> )·2H <sub>2</sub> O                                                                        |
| TUHMOZ01 | 2.070 Å | Ji-Hua Deng, Ya-Qiong Wen, Jie Luo, Zhi-Qiang Huang, Di-Chang Zhong, D.-C. <i>J. Mol. Struct.</i> <b>2017</b> , 1142, 211. [Mg(H <sub>2</sub> O) <sub>6</sub> ](C <sub>8</sub> H <sub>5</sub> N <sub>8</sub> ) <sub>2</sub> ·2H <sub>2</sub> O                                                             |

|          |         |                                                                                                                                                                                                                                                                                               |
|----------|---------|-----------------------------------------------------------------------------------------------------------------------------------------------------------------------------------------------------------------------------------------------------------------------------------------------|
| YIBROR   | 2.070 Å | Rychlewska, U.; Warzajtis, B.; Cvetic, D.; Radanovic, D. D.; Guresic, D. M.; Djuran, M. I. <i>Polyhedron</i> <b>2007</b> , <i>26</i> , 1717. $[\text{Mg}(\text{H}_2\text{O})_6][\text{MnC}_{11}\text{H}_{16}\text{N}_2\text{O}_9] \cdot 2\text{H}_2\text{O}$                                  |
| YUNNAY   | 2.070 Å | Shopov, D. Y.; Campos, J.; Brudvig, G. W.; Crabtree, R. H. <i>J. Am. Chem. Soc.</i> <b>2015</b> , <i>137</i> , 7243. $[\text{Mg}(\text{H}_2\text{O})_6]\text{Cl}_2 \cdot 2[\text{IrC}_{24}\text{H}_{30}\text{N}_3\text{O}_3] \cdot 2(\text{CH}_3)_2\text{CO} \cdot \text{CH}_2\text{Cl}_2$    |
| 2503     | 2.071 Å | Ferraris, G.; Franchini-Angela, M. <i>Acta Crystallogr., Sect. B</i> <b>1973</b> , <i>29</i> , 286-292. $[\text{Mg}(\text{H}_2\text{O})_6]\text{HAsO}_4 \cdot \text{H}_2\text{O}$                                                                                                             |
| 9134     | 2.071 Å | Mathern, G.; Weiss, R. <i>Acta Crystallogr., Sect. B</i> <b>1971</b> , <i>27</i> , 1598-1609. $\text{K}[\text{Mg}(\text{H}_2\text{O})_6]\text{Nb}(\text{O}_2)_4 \cdot \text{H}_2\text{O}$                                                                                                     |
| 30504    | 2.071 Å | Mathew, M.; Schroeder, L. W. <i>Acta Crystallogr. Sect. B</i> <b>1979</b> , <i>35</i> , 11-13. $\text{K}[\text{Mg}(\text{H}_2\text{O})_6]\text{PO}_4 \cdot \text{H}_2\text{O}$                                                                                                                |
| 162313   | 2.071 Å | Bosi, F.; Belardi, G.; Ballirano, P. <i>Am. Miner.</i> <b>2009</b> , <i>94</i> , 74. $\text{K}_2[\text{Mg}(\text{H}_2\text{O})_6](\text{SO}_4)_2$                                                                                                                                             |
| 236113   | 2.071 Å | Wildner, M.; Marinova, D.; Stoilova, D. <i>Int. Res. J. Pure Appl. Chem.</i> <b>2016</b> , <i>13</i> , 1. $\text{Rb}_2[\text{Mg}(\text{H}_2\text{O})_6](\text{CrO}_4)_2$                                                                                                                      |
| 260246   | 2.071 Å | Unruh, D. K.; Burtner, A. Burns, P. C. <i>Inorg. Chem.</i> <b>2009</b> , <i>48</i> , 2346. $\text{K}_2[\text{Mg}(\text{H}_2\text{O})_6][(\text{UO}_2)_3(\text{O}_2)_8] \cdot 2\text{H}_2\text{O}$                                                                                             |
| 409719   | 2.071 Å | Euler, H.; Barbier, B.; Meents, A.; Kirfel, A. <i>Z. Kristallogr. – New Cryst. Struct.</i> <b>2003</b> , <i>218</i> , 265. $\text{Rb}_2[\text{Mg}(\text{H}_2\text{O})_6](\text{SeO}_4)_2$                                                                                                     |
| 409998   | 2.071 Å | Euler, H.; Barbier, B.; Meents, A.; Kirfel, A. <i>Z. Kristallogr. – New Cryst. Struct.</i> <b>2009</b> , <i>224</i> , 351. $\text{K}_2[\text{Mg}(\text{H}_2\text{O})_6](\text{SeO}_4)_2$                                                                                                      |
| 432035   | 2.071 Å | Hoeppe, H. A.; Scharinger, S. W.; Heck, J. G.; Gross, P.; Netzsch, P.; Kazmierczak, K. <i>Solid State Sci.</i> <b>2016</b> , <i>62</i> , 50. $\text{Na}[\text{Mg}(\text{H}_2\text{O})_6](\text{PO}_3\text{S}) \cdot 3\text{H}_2\text{O}$                                                      |
| DAMZAT   | 2.071 Å | Somsook, E.; Rujeeratanavorapan, V.; Pisitsak, P.; Suriyarak, S.; Prabpai, S.; Kongsaree, P.; Pohmakotr, M. <i>Z. Kristallogr. – New Cryst. Struct.</i> <b>2004</b> , <i>219</i> , 319. $[\text{Mg}(\text{H}_2\text{O})_6](\text{C}_{18}\text{H}_{13}\text{O}_4)_2 \cdot 4\text{H}_2\text{O}$ |
| DAWVON01 | 2.071 Å | Rychlewska, U.; Warzajtis, B.; Cvetic, D.; Radanovic, D. D.; Guresic, D. M.; Djuran, M. I. <i>Polyhedron</i> <b>2007</b> , <i>26</i> , 1717. $[\text{Mg}(\text{H}_2\text{O})_6][\text{CdC}_{11}\text{H}_{16}\text{N}_2\text{O}_9] \cdot 2\text{H}_2\text{O}$                                  |
| LOJVOY   | 2.071 Å | Xanthopoulos, K.; Anagnostou, Z.; Chalkiadakis, S.; Choquesillo-Lazarte, D.; Mezei, G.; Zareba, J. K.; Zon, J.; Demadis, K. D. <i>Crystals</i> <b>2019</b> , <i>9</i> , 301. $[\text{Mg}(\text{H}_2\text{O})_6](p\text{-H}_3\text{NC}_6\text{H}_4\text{CHPO}_3)_2 \cdot 6\text{H}_2\text{O}$  |
| MAZLOO   | 2.071 Å | Hermann, J.; Erxleben, A. <i>Inorg. Chim. Acta</i> <b>2000</b> , <i>304</i> , 125. $[\text{Mg}(\text{H}_2\text{O})_6][\text{ZnC}_{30}\text{H}_{30}\text{N}_{16}\text{O}_4] \cdot 6\text{H}_2\text{O}$                                                                                         |
| YODWUK   | 2.071 Å | Riesen, H.; David Rae, A. <i>Dalton Trans.</i> <b>2008</b> , 4717. $[\text{Mg}(\text{H}_2\text{O})_6]_3[\text{Al}_3\text{Na}_3\text{C}_{18}\text{O}_{36}] \cdot 9\text{H}_2\text{O}$                                                                                                          |
| 10080    | 2.072 Å | Schroeder, L. W.; Mathew, M.; Brown, W. E. <i>J. Phys. Chem.</i> <b>1978</b> , <i>82</i> , 2335-2340. $[\text{Mg}(\text{H}_2\text{O})_6]_3(\text{PO}_4)_2 \cdot 4\text{H}_2\text{O}$                                                                                                          |
| 14269    | 2.072 Å | Whitaker, A.; Jeffery, J. W. <i>Acta Crystallogr., Sect. B</i> <b>1970</b> , <i>26</i> , 1429-1439. $\text{NH}_4[\text{Mg}(\text{H}_2\text{O})_6]\text{PO}_4$                                                                                                                                 |
| 39216    | 2.072 Å | Avtamonova, N. V.; Trunov, V. K.; Makarevich, L. G. <i>Iz. Akad. Nauk SSSR, Neorg. Mater.</i> <b>1990</b> , <i>26</i> , 350-356. $\text{K}_2[\text{Mg}(\text{H}_2\text{O})_6][\text{V}_{10}\text{O}_{28}] \cdot 10\text{H}_2\text{O}$                                                         |



|          |         |                                                                                                                                                                                                                                                                                                                                                              |
|----------|---------|--------------------------------------------------------------------------------------------------------------------------------------------------------------------------------------------------------------------------------------------------------------------------------------------------------------------------------------------------------------|
| 409737   | 2.072 Å | Euler, H.; Barbier, B.; Meents, A.; Kirfel, A. <i>Z. Kristallogr. – New Cryst. Struct.</i> <b>2003</b> , <i>218</i> , 409. Cs <sub>2</sub> [Mg(H <sub>2</sub> O) <sub>6</sub> ](SO <sub>4</sub> ) <sub>2</sub>                                                                                                                                               |
| AFEXEQ   | 2.072 Å | Martsinko, E. E.; Minacheva, L. K.; Chebanenko, E. A.; Seifullina, I. I.; Sergienko, V. S.; Churakov, A. <i>V. Zh. Neorg. Khim.</i> <b>2013</b> , <i>58</i> , 588. [Mg(H <sub>2</sub> O) <sub>6</sub> ][SnC <sub>12</sub> H <sub>10</sub> O <sub>14</sub> ] <sub>2</sub> ·4H <sub>2</sub> O                                                                  |
| AXIMOJ   | 2.072 Å | Liu, W.-L.; Zou, Y.; Ni, C.-L.; Ni, Z.-P.; Li, Y.-Z.; Yao, Y.-G.; Meng, Q.-J. <i>Polyhedron</i> <b>2004</b> , <i>23</i> , 849. [Mg(H <sub>2</sub> O) <sub>6</sub> ][CuC <sub>13</sub> H <sub>12</sub> N <sub>3</sub> O <sub>5</sub> ] <sub>2</sub> ·3.5H <sub>2</sub> O                                                                                      |
| FUYCOS03 | 2.072 Å | Missina, J. M.; Conti, L.; Rossi, P.; Ienco, A.; Nunes, G. G.; Valtancoli, B.; Chelazzi, L.; Paoli, P. <i>Inorg. Chim. Acta.</i> <b>2021</b> , <i>523</i> , 120319. [Mg(H <sub>2</sub> O) <sub>6</sub> ]( <i>p</i> -C <sub>6</sub> H <sub>4</sub> (CH <sub>2</sub> C <sub>3</sub> H <sub>7</sub> )(CH(CH <sub>3</sub> )COO)) <sub>2</sub> ·2H <sub>2</sub> O |
| LUTVUS   | 2.072 Å | Monteiro, B.; Cunha-Silva, L.; Gago, S.; Klinowski, J.; Paz, F. A. A.; Rocha, J.; Goncalves, I. S.; Pillinger, M. <i>Polyhedron</i> <b>2010</b> , <i>29</i> , 719. ((CH <sub>3</sub> ) <sub>4</sub> N) <sub>4</sub> [Mg(H <sub>2</sub> O) <sub>6</sub> ][MoC <sub>14</sub> H <sub>7</sub> O <sub>10</sub> ] <sub>2</sub> ·13H <sub>2</sub> O                 |
| WABFOW   | 2.072 Å | Pasdar, H.; Heidari, S.; Aghabozorg, H.; Notash, B. <i>Acta Crystallogr., Sect. E</i> <b>2010</b> , <i>66</i> , m657. [Mg(H <sub>2</sub> O) <sub>6</sub> ](C <sub>7</sub> H <sub>4</sub> NO <sub>4</sub> ) <sub>2</sub>                                                                                                                                      |
| WOPXOQ   | 2.072 Å | Hassan, D. b.; Rekik, W.; Naili, H.; Mhiri, T. <i>Chem. Papers</i> <b>2014</b> , <i>68</i> , 210. [Mg(H <sub>2</sub> O) <sub>6</sub> ](C <sub>5</sub> H <sub>14</sub> N <sub>2</sub> )(SO <sub>4</sub> ) <sub>2</sub>                                                                                                                                        |
| YADGOB   | 2.072 Å | Schau-Magnussen, M.; Gorbanev, Y. Y.; Kegnaes, S.; Riisager, A. <i>Acta Crystallogr., Sect. C</i> <b>2011</b> , <i>67</i> , m327. [Mg(H <sub>2</sub> O) <sub>6</sub> ]C <sub>6</sub> H <sub>2</sub> O <sub>5</sub>                                                                                                                                           |
| ZUKSAC   | 2.072 Å | Huskic, I.; Friscic, T. <i>Cryst. Growth Des.</i> <b>2020</b> , <i>20</i> , 525. [Mg((H <sub>2</sub> O) <sub>6</sub> )[GaNaC <sub>6</sub> H <sub>12</sub> ] <sub>2</sub> ·3H <sub>2</sub> O                                                                                                                                                                  |
| 16035    | 2.073 Å | Baggio, S.; Amzel, L.; Becka, L. N. <i>Acta Crystallogr., Sect. B</i> <b>1969</b> , <i>25</i> , 1650-2653. [Mg(H <sub>2</sub> O) <sub>6</sub> ]S <sub>2</sub> O <sub>3</sub>                                                                                                                                                                                 |
| 16111    | 2.073 Å | Ferraris, G.; Jones, D. W. <i>J. Chem. Soc., Dalton Trans.</i> <b>1973</b> , 816. [Mg(H <sub>2</sub> O) <sub>6</sub> ]SO <sub>4</sub> ·H <sub>2</sub> O                                                                                                                                                                                                      |
| 32527    | 2.073 Å | Takagi, S.; Mathew, M.; Brown, W. E. <i>Acta Crystallogr., Sect. B</i> <b>1982</b> , <i>38</i> , 44-50. K[Mg(H <sub>2</sub> O) <sub>6</sub> ]H(PO <sub>4</sub> ) <sub>2</sub> ·3H <sub>2</sub> O                                                                                                                                                             |
| 56834    | 2.073 Å | Nagel, R.; Botova, M.; Pracht, G.; Suchanek, E.; Maneva, M.; Lutz, H. D. <i>Z. Naturforsch., Teil B</i> <b>1999</b> , <i>54</i> , 999-1008. H <sub>4</sub> [Mg(H <sub>2</sub> O) <sub>6</sub> ](IO <sub>5</sub> ) <sub>2</sub>                                                                                                                               |
| 170694   | 2.073 Å | Messouri, I.; El Bali, B.; Capitelli, F.; Piniella, J. F.; Lachkar, M.; Slimani, Z. <i>Acta Crystallogr., Sect. E</i> <b>2005</b> , <i>61</i> , i129. (NH <sub>4</sub> ) <sub>2</sub> [Mg(H <sub>2</sub> O) <sub>6</sub> ] <sub>2</sub> (HPO <sub>4</sub> ) <sub>3</sub>                                                                                     |
| 236112   | 2.073 Å | Wildner, M.; Marinova, D.; Stoilova, D. <i>Int. Res. J. Pure Appl. Chem.</i> <b>2016</b> , <i>13</i> , 1. Cs <sub>2</sub> [Mg(H <sub>2</sub> O) <sub>6</sub> ](CrO <sub>4</sub> ) <sub>2</sub>                                                                                                                                                               |
| 252895   | 2.073 Å | Huskic, I.; Pekov, I. V.; Krivovichev, S. V.; Friscic, T. <i>Sci. Adv.</i> <b>2016</b> , <i>2</i> , 1600621. Na[Mg(H <sub>2</sub> O) <sub>6</sub> ][Fe <sub>0.4</sub> Al <sub>0.6</sub> (C <sub>2</sub> O <sub>4</sub> ) <sub>3</sub> ] <sub>2</sub> ·3H <sub>2</sub> O                                                                                      |
| 409875   | 2.073 Å | Hinrichs, F.; Gjikaj, M. <i>Z. Kristallogr.</i> <b>2006</b> , <i>221</i> , 121. (NH <sub>4</sub> ) <sub>2</sub> [Mg(H <sub>2</sub> O) <sub>6</sub> ](P <sub>2</sub> O <sub>6</sub> )·2H <sub>2</sub> O                                                                                                                                                       |
| APOJIZ   | 2.073 Å | Li, S.-J.; Song, W.-D.; Miao, D.-L.; Ma, D.-Y. <i>Acta Crystallogr., Sect. C</i> <b>2011</b> , <i>67</i> , m105. [Mg(H <sub>2</sub> O) <sub>6</sub> ][Cu <sub>2</sub> C <sub>16</sub> H <sub>4</sub> N <sub>2</sub> O <sub>14</sub> ] <sub>2</sub> ·2H <sub>2</sub> O                                                                                        |
| BAWGOV   | 2.073 Å | Smith, G. O'Reilly, E. J.; Kennard, C. H. L. <i>Cryst. Struct. Commun.</i> <b>1981</b> , <i>10</i> , 1277. [Mg(H <sub>2</sub> O) <sub>6</sub> ](C <sub>6</sub> H <sub>2</sub> Cl <sub>3</sub> N <sub>2</sub> O <sub>2</sub> ) <sub>2</sub> ·4H <sub>2</sub> O                                                                                                |

|          |         |                                                                                                                                                                                                                                                                                                                                             |
|----------|---------|---------------------------------------------------------------------------------------------------------------------------------------------------------------------------------------------------------------------------------------------------------------------------------------------------------------------------------------------|
| FEDQUA   | 2.073 Å | Harrowfield, J. M.; Sharma, R. P.; Skelton, B. W.; Venugopalam, P.; White, A. H. <i>Aust. J. Chem.</i> <b>1998</b> , <i>51</i> , 775. [Mg(H <sub>2</sub> O) <sub>6</sub> ]( <i>p</i> -NOC <sub>6</sub> H <sub>4</sub> O) <sub>2</sub> ·2H <sub>2</sub> O                                                                                    |
| GADZAP   | 2.073 Å | Zhu, J.; Jin, S.; Wan, L. Zhang, C.; Li, L.; Chen, S.; Shu, Q. <i>Dalton Trans.</i> <b>2016</b> , <i>45</i> , 3590.<br>[Mg(H <sub>2</sub> O) <sub>6</sub> ](C <sub>4</sub> H <sub>3</sub> N <sub>8</sub> O <sub>2</sub> ) <sub>2</sub> ·4H <sub>2</sub> O                                                                                   |
| NOPPUE   | 2.073 Å | Klapotke, T. M.; Minar, N. K.; Stierstorfer, J. <i>Polyhedron</i> <b>2009</b> , <i>28</i> , 13. [Mg(H <sub>2</sub> O) <sub>6</sub> ](C <sub>4</sub> H <sub>6</sub> N <sub>11</sub> ) <sub>2</sub> ·6H <sub>2</sub> O                                                                                                                        |
| OKUVAT   | 2.073 Å | Piro, O. E.; Echeverria, G. A.; Gonzalez-Baro, A. C.; Baran, E. J. <i>Phys. Chem. Minerals</i> <b>2016</b> , <i>43</i> , 287.<br>[Mg(H <sub>2</sub> O) <sub>6</sub> ][AlNaC <sub>6</sub> O <sub>12</sub> ]·3H <sub>2</sub> O                                                                                                                |
| TUCMEL   | 2.073 Å | Gruene, T.; Sheldrick, G. M.; Zlatopolskiy, B. D.; Kozhushkov, S. I.; de Meijere, A. <i>Z. Naturforsch., Teil B</i> <b>2014</b> , <i>69</i> , 945. [Mg(H <sub>2</sub> O) <sub>6</sub> ](CH <sub>3</sub> CH(O)CH <sub>3</sub> ) <sub>2</sub> ·2(C <sub>55</sub> H <sub>69</sub> ClN <sub>10</sub> O <sub>14</sub> )·12H <sub>2</sub> O       |
| TUHMOZ   | 2.073 Å | Peli, G. Masciocchi, N.; Garlaschelli, L.; Aprea, A.; Maspero, A. <i>Inorg. Chim. Acta</i> <b>2009</b> , <i>362</i> , 4630.<br>[Mg(H <sub>2</sub> O) <sub>6</sub> ](C <sub>8</sub> H <sub>5</sub> N <sub>8</sub> ) <sub>2</sub> ·2H <sub>2</sub> O                                                                                          |
| 9341     | 2.074 Å | Whitaker, A. <i>Z. Kristallogr., Kristallgeom., Kristallphys., Kristallchem.</i> <b>1973</b> , <i>137</i> , 194, 246.<br>[Mg(H <sub>2</sub> O) <sub>6</sub> ]HAsO <sub>4</sub> ·H <sub>2</sub> O                                                                                                                                            |
| 80936    | 2.074   | Waisumi, K.; Masudam H.; Fukushima, N. <i>Inorg Chim. Acta</i> <b>1995</b> , <i>238</i> , 121. [Mg(H <sub>2</sub> O) <sub>6</sub> ] <sub>2</sub> [MnCl <sub>6</sub> ]                                                                                                                                                                       |
| 252894   | 2.074 Å | Huskic, I.; Pekov, I. V.; Krivovichev, S. V.; Friscic, T. <i>Sci. Adv.</i> <b>2016</b> , <i>2</i> , 1600621.<br>Na[Mg(H <sub>2</sub> O) <sub>6</sub> ][Fe(C <sub>2</sub> O <sub>4</sub> ) <sub>3</sub> ]·3H <sub>2</sub> O                                                                                                                  |
| CANRIW   | 2.074 Å | Singha, S.; Khanra, B.; Goswami, S.; Mondal, R.; Jana, R.; Dey, A.; Dey, S. K.; Ray, P. P.; Rizzoli, C.; Saha, R.; Kumar, S. <i>New. J. Chem.</i> <b>2021</b> , <i>45</i> , 20596. [Mg(H <sub>2</sub> O) <sub>6</sub> ][Co(H <sub>2</sub> O) <sub>2</sub> (C <sub>7</sub> H <sub>3</sub> NO <sub>4</sub> ) <sub>2</sub> ]·4H <sub>2</sub> O |
| CUSZEY   | 2.074 Å | Chen, Y.; Gao, R.; Zhao, X.; Ruan, Z.; Lin, J.; Tian, Z.; Liu, S. <i>J. Mol. Struct.</i> <b>2021</b> , <i>1224</i> , 120301.<br>[Mg(H <sub>2</sub> O) <sub>6</sub> ](C <sub>3</sub> H <sub>5</sub> N <sub>2</sub> )[Dy(C <sub>7</sub> H <sub>3</sub> NO <sub>4</sub> ) <sub>3</sub> ]·7H <sub>2</sub> O                                     |
| DEVTUW   | 2.074 Å | Su, Q.; Wang, X. J.; Shu, Q. H.; Jin, S. H.; Chen, S. S.; Li J.-L. <i>J. Heterocycl. Chem.</i> <b>2018</b> , <i>55</i> , 481.<br>[Mg(H <sub>2</sub> O) <sub>6</sub> ](C <sub>4</sub> H <sub>2</sub> N <sub>10</sub> O <sub>4</sub> )                                                                                                        |
| FEDQUA01 | 2.074 Å | Muthuraman, M.; Bordet, P.; Le Fur, Y. <i>Z. Kristallogr.-New. Cryst. Struct.</i> <b>1999</b> , <i>214</i> , 527.<br>[Mg(H <sub>2</sub> O) <sub>6</sub> ]( <i>p</i> -NOC <sub>6</sub> H <sub>4</sub> O) <sub>2</sub> ·2H <sub>2</sub> O                                                                                                     |
| FUYCOS   | 2.074 Å | Chow, E. H. H.; Strobridge, F. C.; Friscic, T. <i>Chem. Commun.</i> <b>2010</b> , <i>46</i> , 6368.<br>[Mg(H <sub>2</sub> O) <sub>6</sub> ](C <sub>13</sub> H <sub>17</sub> O <sub>2</sub> ) <sub>2</sub> ·2H <sub>2</sub> O                                                                                                                |
| HETZUB   | 2.074 Å | Kariuki, B. M.; Valim, J. B.; Jones, W.; King, J. <i>Acta Crystallogr., Sect. C</i> <b>1994</b> , <i>50</i> , 1665.<br>[Mg(H <sub>2</sub> O) <sub>6</sub> ]( <i>p</i> -OOCCHCH-C <sub>6</sub> H <sub>4</sub> Cl) <sub>2</sub> ·2H <sub>2</sub> O                                                                                            |
| IWOYEY   | 2.074 Å | Liu, J.-W.; Gao, S.; Huo, L.-H.; Dong, Y.; Zhao, H. <i>Acta Crystallogr., Sect. E</i> <b>2004</b> , <i>60</i> , m845.<br>[Mg(H <sub>2</sub> O) <sub>6</sub> ]C <sub>10</sub> H <sub>8</sub> O <sub>6</sub> ·3H <sub>2</sub> O                                                                                                               |
| KAYQUY   | 2.074 Å | Yang, G.-W.; Wang, B.-J.; Shen, Z.-T.; Li, Q.-Y.; Ji, C.; Shen, X.-F.; He, M.-H. <i>J. Coord. Chem.</i> <b>2012</b> , <i>65</i> , 2657. [Mg(H <sub>2</sub> O) <sub>6</sub> ](C <sub>5</sub> H <sub>3</sub> N <sub>6</sub> ) <sub>2</sub>                                                                                                    |
| MGCITD   | 2.074 Å | Johnson, C. K. <i>Acta Crystallogr.</i> <b>1965</b> , <i>18</i> , 1004. [Mg(H <sub>2</sub> O) <sub>6</sub> ][MgC <sub>6</sub> H <sub>7</sub> O <sub>8</sub> ] <sub>2</sub> ·2H <sub>2</sub> O                                                                                                                                               |

|          |         |                                                                                                                                                                                                                                                                                              |
|----------|---------|----------------------------------------------------------------------------------------------------------------------------------------------------------------------------------------------------------------------------------------------------------------------------------------------|
| NIMXUD   | 2.074 Å | Radanovic, D. D.; Rychlewska, U.; Warzajtis, B.; Cvijovic, M. S.; Dimitrijevic, M. D.; Djuran, M. I. <i>Polyhedron</i> <b>2007</b> , <i>26</i> , 4799. [Mg(H <sub>2</sub> O) <sub>6</sub> ][NiC <sub>12</sub> H <sub>16</sub> N <sub>2</sub> O <sub>8</sub> ]·3H <sub>2</sub> O              |
| 14365    | 2.075 Å | Weiss, R.; Wendling, J. P.; Grandjean, D. <i>Acta Crystallogr.</i> <b>1966</b> , <i>20</i> , 563-566. [Mg(H <sub>2</sub> O) <sub>6</sub> ]SeO <sub>3</sub>                                                                                                                                   |
| 172340   | 2.075 Å | Abdallah, K. I.; Mohamed, S.; Mohamed, R.; Abdelhalim, G. <i>Acta Crystallogr., Sect. C</i> <b>2006</b> , <i>62</i> , i43. (NH <sub>4</sub> ) <sub>2</sub> [Mg(H <sub>2</sub> O) <sub>6</sub> ] <sub>2</sub> (HPO <sub>4</sub> ) <sub>3</sub>                                                |
| 419837   | 2.075 Å | Weil, M. <i>Cryst. Res. Technol.</i> <b>2008</b> , <i>43</i> , 1286. Tl[Mg(H <sub>2</sub> O) <sub>6</sub> ]PO <sub>4</sub>                                                                                                                                                                   |
| FEDQUA02 | 2.075 Å | Shirin, S.; Roy, S.; Rao, A.; Pillai, P. P. <i>J. Phys. Chem. C</i> <b>2020</b> , <i>124</i> , 19157. [Mg((H <sub>2</sub> O) <sub>6</sub> )(p-NO <sub>2</sub> C <sub>6</sub> H <sub>4</sub> O) <sub>2</sub> ·2H <sub>2</sub> O                                                               |
| GAYJAU   | 2.075 Å | Witty, M.; Dingra, N. N.; Abboud, K. A.; Felts, A. C.; Theppawut; Ayudhya, I. N. <i>Anal. Letters</i> <b>2017</b> , <i>50</i> , 2549. NH <sub>4</sub> [Mg((H <sub>2</sub> O) <sub>6</sub> ]PO <sub>4</sub>                                                                                   |
| JOKQOQ   | 2.075 Å | Kiseleva, E. A.; Troyanov, S. I.; Korenev, Y. M. <i>Koord. Khim.</i> <b>2007</b> , <i>33</i> , 89. [Mg(H <sub>2</sub> O) <sub>6</sub> ](t-C <sub>4</sub> H <sub>9</sub> COO) <sub>2</sub> ·3H <sub>2</sub> O                                                                                 |
| KAVBUE   | 2.075 Å | Solans, X.; Gali, S.; Font-Altaba, M.; Oliva, J.; Herrera, J. <i>Afinidad</i> <b>1988</b> , <i>45</i> , 243. [Mg(H <sub>2</sub> O) <sub>6</sub> ][MnC <sub>10</sub> H <sub>14</sub> N <sub>2</sub> O <sub>9</sub> ] <sub>2</sub> ·2H <sub>2</sub> O                                          |
| MGHBZA21 | 2.075 Å | Luo, Y.-H. CCDC deposition number 890730, <b>2016</b> . [Mg(H <sub>2</sub> O) <sub>6</sub> ](p-OOCC <sub>6</sub> H <sub>4</sub> OH) <sub>2</sub> ·2H <sub>2</sub> O                                                                                                                          |
| OHISUW   | 2.075 Å | Chang, X.; Jiang, L.-T.; Chen, S.-C.; He, M.-Y.; Chen, Q. <i>J. Coord. Chem.</i> <b>2020</b> , <i>73</i> , 439. [Mg(H <sub>2</sub> O) <sub>6</sub> ][Cu <sub>2</sub> MgC <sub>52</sub> H <sub>36</sub> N <sub>20</sub> O <sub>12</sub> ] <sub>3</sub> ·8H <sub>2</sub> O                     |
| QUGLAI   | 2.075 Å | Kerber, W. D.; Hartnett, D. S.; Wang, A.; Mafrice, C. H.; Siegler, M. A. <i>Inorg. Chim. Acta</i> <b>2020</b> , <i>506</i> , 119547. [Mg(H <sub>2</sub> O) <sub>6</sub> ][Mg <sub>2</sub> C <sub>16</sub> H <sub>22</sub> FN <sub>2</sub> O <sub>13</sub> ] <sub>2</sub> ·14H <sub>2</sub> O |
| UDIVIN01 | 2.075 Å | Arlin, J.-B.; Florence, A. J.; Johnston, A.; Kennedy, A. R.; Miller, G. J.; Patterson, K. <i>Cryst. Growth Des.</i> <b>2011</b> , <i>11</i> , 1318. [Mg(H <sub>2</sub> O) <sub>6</sub> ](p-NO <sub>2</sub> C <sub>6</sub> H <sub>4</sub> OH) <sub>2</sub> ·2H <sub>2</sub> O                 |
| 23668    | 2.076 Å | Suesse, P. <i>Neues Jahrbuch für Mineralogie. Monatshefte</i> <b>1973</b> , 93. Na[Mg(H <sub>2</sub> O) <sub>6</sub> ] <sub>2</sub> Fe <sub>5</sub> (SO <sub>4</sub> ) <sub>7</sub> (OH) <sub>6</sub> ·24H <sub>2</sub> O                                                                    |
| 24841    | 2.076 Å | Elerman, Y.; Fuess, H.; Joswig, W. <i>Acta Crystallogr. Sect. B</i> <b>1982</b> , <i>38</i> , 1799. [Mg(H <sub>2</sub> O) <sub>6</sub> ]S <sub>2</sub> O <sub>3</sub>                                                                                                                        |
| 112809   | 2.076 Å | Yuan, F.; Hu, L.; Bai, Z.; Liu, L.; Huang, Y.; Zhang, L.; Wei, D.; Lin, Z. <i>Inorg. Chem.</i> <b>2021</b> , <i>60</i> , 8103. K[Mg(H <sub>2</sub> O) <sub>6</sub> ]PO <sub>4</sub>                                                                                                          |
| 404779   | 2.076 Å | Peter, S.; Suchanek, E.; Esser, D.; Lutz, H. D. <i>Z. Naturforsch., Teil B.</i> <b>1996</b> , <i>51</i> , 1072. [Mg(H <sub>2</sub> O) <sub>6</sub> ](BrO <sub>3</sub> ) <sub>2</sub>                                                                                                         |
| 430263   | 2.076 Å | Yelovik, N. A.; Mironov, A. V.; Bykov, M. A.; Kuznetsov, A. N.; Grigorieva, A. V.; Wie, Z.; Dikarev, E. V. Shevelkov, A. V. <i>Inorg. Chem.</i> <b>2016</b> , <i>55</i> , 4132. [Mg(H <sub>2</sub> O) <sub>6</sub> ][Bi <sub>2</sub> I <sub>8</sub> ]                                        |
| 434667   | 2.076 Å | Weil, M. <i>Z. Naturforsch., Teil B</i> <b>2019</b> , <i>74</i> , 9. K[Mg(H <sub>2</sub> O) <sub>6</sub> ]AsO <sub>4</sub>                                                                                                                                                                   |
| AQMEDA   | 2.076 Å | Julian, M. O.; Day, V. W.; Hoard, J. L. <i>Inorg. Chem.</i> <b>1973</b> , <i>12</i> , 1754. [Mg(H <sub>2</sub> O) <sub>6</sub> ]C <sub>10</sub> H <sub>14</sub> N <sub>2</sub> O <sub>8</sub>                                                                                                |
| AQOKEY   | 2.076 Å | Fujita, M.; Kazerouni, A. M.; Bacsá, J. <i>Acta Crystallogr., Sect. C</i> <b>2016</b> , <i>72</i> , 627. [Mg(H <sub>2</sub> O) <sub>6</sub> ](CF <sub>3</sub> SO <sub>3</sub> ) <sub>2</sub> ·C <sub>54</sub> H <sub>90</sub> N <sub>6</sub> O <sub>18</sub> ·3H <sub>2</sub> O              |

|          |         |                                                                                                                                                                                                                                                                                                                            |
|----------|---------|----------------------------------------------------------------------------------------------------------------------------------------------------------------------------------------------------------------------------------------------------------------------------------------------------------------------------|
| DANFUU   | 2.076 Å | Costes, J.-P.; Clemente-Juan, J. M.; Dahan, F.; Milon, J. <i>Inorg. Chem.</i> <b>2004</b> , <i>43</i> , 8200.<br>[Mg(H <sub>2</sub> O) <sub>6</sub> ][CuC <sub>11</sub> H <sub>13</sub> N <sub>2</sub> O <sub>3</sub> ] <sub>2</sub> ·3H <sub>2</sub> O                                                                    |
| SOMSUK   | 2.076 Å | Piro, O. E.; Echeverria, G. A.; Gonzalez-Baro, A. C.; Baran, E. J. <i>J. Coord. Chem.</i> <b>2015</b> , <i>68</i> , 3776.<br>[Mg(H <sub>2</sub> O) <sub>6</sub> ][NaCrC <sub>6</sub> O <sub>12</sub> ]·3H <sub>2</sub> O                                                                                                   |
| 20220    | 2.077 Å | Serezhkin, V. N.; Soldatkina, M. A.; Efremov, V. A. <i>Zh. Strukt. Khim.</i> <b>1981</b> , <i>22</i> , 174.<br>[Mg(H <sub>2</sub> O) <sub>6</sub> ]UO <sub>2</sub> (SO <sub>4</sub> ) <sub>2</sub> ·3H <sub>2</sub> O                                                                                                      |
| 44890    | 2.077 Å | Fernandez Gonzalez, R.; Lopez de Lerma, J. <i>Anales de la Real Sociedad Espanola de Fisica y Quimica. Serie A: Fisica</i> <b>1955</b> , <i>51</i> , 29. NH <sub>4</sub> [Mg(H <sub>2</sub> O) <sub>6</sub> ]AsO <sub>4</sub>                                                                                              |
| BIKPUG   | 2.077 Å | Cingi, M. B.; Lanfredi, A. M. M.; Tiripicchio, A.; Bandoli, G.; Clemente, D. A. <i>Inorg. Chim. Acta</i> <b>1981</b> , <i>52</i> , 237. [Mg(H <sub>2</sub> O) <sub>6</sub> ]Br <sub>2</sub> ·2C <sub>8</sub> H <sub>10</sub> N <sub>4</sub> O <sub>2</sub>                                                                 |
| 419835   | 2.077 Å | Weil, M. <i>Cryst. Res. Technol.</i> <b>2008</b> , <i>43</i> , 1286. Rb[Mg(H <sub>2</sub> O) <sub>6</sub> ]AsO <sub>4</sub>                                                                                                                                                                                                |
| 132052   | 2.077 Å | Rincke, C.; Schmidt, H.; Buth, G.; Voigt, W. <i>Acta Crystallogr., Sect. C</i> <b>2020</b> , <i>76</i> , 741.<br>[Mg(H <sub>2</sub> O) <sub>6</sub> ]·MgCl <sub>2</sub> ·H <sub>2</sub> O                                                                                                                                  |
| 252898   | 2.077 Å | Huskic, I.; Pekov, I. V.; Krivovichev, S. V.; Friscic, T. <i>Sci. Adv.</i> <b>2016</b> , <i>2</i> , 1600621.<br>Na[Mg(H <sub>2</sub> O) <sub>6</sub> ][Fe <sub>0.32</sub> Al <sub>0.68</sub> (C <sub>2</sub> O <sub>4</sub> ) <sub>3</sub> ]·3H <sub>2</sub> O                                                             |
| GUVJUE   | 2.077 Å | Kovalenko, E. A.; Samsonenko, D.G.; Naumov, D. Y.; Fedin, V. P. <i>Zh. Strukt. Khim.</i> <b>2014</b> , <i>55</i> , S274.<br>[Mg(H <sub>2</sub> O) <sub>6</sub> ](p-C <sub>6</sub> H <sub>4</sub> (COO) <sub>2</sub> )·C <sub>36</sub> H <sub>36</sub> N <sub>24</sub> O <sub>12</sub> ·14H <sub>2</sub> O                  |
| IQOSUF   | 2.077 Å | Liu, J.-J.; Sun, Z.-L.; Liu, J.; Xia, S.-B. <i>J. Mol. Struct.</i> <b>2021</b> , <i>1238</i> , 130444.<br>[Mg(H <sub>2</sub> O) <sub>6</sub> ](C <sub>26</sub> H <sub>14</sub> N <sub>2</sub> O <sub>8</sub> )·H <sub>2</sub> O                                                                                            |
| ZAZQUP   | 2.077 Å | Kamburov, S.; Schmidt, H.; Voigt, W.; Balarew, C. <i>Acta Crystallogr., Sect. C</i> <b>2017</b> , <i>73</i> , 582.<br>[Mg(H <sub>2</sub> O) <sub>6</sub> ][NaSeO <sub>4</sub> (H <sub>2</sub> O) <sub>2</sub> ]                                                                                                            |
| 43309    | 2.078 Å | Montgomery, H.; Lingafelter, E. C. <i>Acta Crystallogr.</i> <b>1964</b> , <i>17</i> , 1478-1479. (NH <sub>4</sub> ) <sub>2</sub> [Mg(H <sub>2</sub> O) <sub>6</sub> ](SO <sub>4</sub> ) <sub>2</sub>                                                                                                                       |
| CIKYEC   | 2.078 Å | Shankar, K.; Das, B.; Baruah, J. B. <i>Eur. J. Inorg. Chem.</i> <b>2013</b> , 6147. [Mg(H <sub>2</sub> O) <sub>6</sub> ][CuC <sub>14</sub> H <sub>6</sub> N <sub>2</sub> O <sub>8</sub> ]·2H <sub>2</sub> O                                                                                                                |
| IXOJAJ   | 2.077 Å | Karaer, E.; Kose, D. A.; Sahin, Z. S.; Sahin, O. <i>J. Mol. Struct.</i> <b>2021</b> , <i>1244</i> , 130970.<br>[Mg(H <sub>2</sub> O) <sub>6</sub> ](C <sub>9</sub> H <sub>5</sub> O <sub>3</sub> ) <sub>2</sub>                                                                                                            |
| MGABES   | 2.078 Å | Broomhead, J. M.; Nicol, A. D. I. <i>Acta Crystallogr.</i> <b>1948</b> , <i>1</i> , 88. [Mg(H <sub>2</sub> O) <sub>6</sub> ](C <sub>6</sub> H <sub>5</sub> SO <sub>3</sub> ) <sub>2</sub>                                                                                                                                  |
| QIWGIO   | 2.078 Å | Kobayashi, A.; Ohba, T.; Saitoh, E.; Suzuki, Y.; Noro, S.; Chang, H.-C.; Kato, M. <i>Inorg. Chem.</i> <b>2014</b> , <i>53</i> , 2910. . [Mg(H <sub>2</sub> O) <sub>6</sub> ][MgRuC <sub>36</sub> H <sub>24</sub> N <sub>6</sub> O <sub>15</sub> ]                                                                          |
| 2531     | 2.079 Å | Ferraris, G.; Franchini-Angela, M. <i>Acta Crystallogr., Sect B</i> <b>1973</b> , <i>29</i> , 859. NH <sub>4</sub> [Mg(H <sub>2</sub> O) <sub>6</sub> ]AsO <sub>4</sub>                                                                                                                                                    |
| CDEDTA11 | 2.079 Å | Solans, X.; Gali, S.; Font-Altaba, M.; Oliva, J.; Herrera, J. <i>Acta Crystallogr. Sect. C</i> <b>1983</b> , <i>39</i> , 438.<br>[Mg(H <sub>2</sub> O) <sub>6</sub> ][Cd(C <sub>10</sub> H <sub>14</sub> N <sub>2</sub> O <sub>9</sub> ) <sub>2</sub> ]·3H <sub>2</sub> O                                                  |
| ETATIF   | 2.079 Å | Louati, M.; Ksiksi, R.; Elbini-Dhouib, I.; Mlayah-Bellalouna, S.; Doghri, R.; Srairi-Abid, N.; Zid, M.-F. <i>J. Mol. Struct.</i> <b>2021</b> , <i>1242</i> , 130711. [Mg(H <sub>2</sub> O) <sub>6</sub> ](C <sub>4</sub> H <sub>7</sub> N <sub>2</sub> ) <sub>4</sub> [V <sub>10</sub> O <sub>28</sub> ]·4H <sub>2</sub> O |

|          |         |                                                                                                                                                                                                                                                                          |
|----------|---------|--------------------------------------------------------------------------------------------------------------------------------------------------------------------------------------------------------------------------------------------------------------------------|
| GELTEX   | 2.079 Å | Kontturi, M.; Kunnas-Hiltunen, S.; Vepsalainen, J. J.; Ahlgren, M. <i>Solid State Sci.</i> <b>2006</b> , 8, 1098. [Mg(H <sub>2</sub> O) <sub>6</sub> ][Mg <sub>2</sub> C <sub>2</sub> H <sub>4</sub> Cl <sub>4</sub> O <sub>14</sub> P <sub>4</sub> ]·14H <sub>2</sub> O |
| MGCITD01 | 2.079 Å | Kaduk, J. A. <i>Acta Crystallogr. Sect. E</i> <b>2020</b> , 76, 1611. [Mg(H <sub>2</sub> O) <sub>6</sub> ][MgC <sub>6</sub> H <sub>7</sub> O <sub>8</sub> ] <sub>2</sub> ·2H <sub>2</sub> O                                                                              |
| 10423    | 2.080 Å | Wan, C.; Ghose, S. <i>Am. Mineral.</i> <b>1977</b> , 62, 1135. [Mg(H <sub>2</sub> O) <sub>6</sub> ]B <sub>4</sub> O <sub>5</sub> (OH) <sub>4</sub> ·H <sub>2</sub> O                                                                                                     |
| 20128    | 2.080 Å | Razmanova, Z. P.; Rumanova, I. M.; Belov, N. V. <i>Dokl. Akad. Nauk SSSR</i> <b>1969</b> , 189, 1003. [Mg(H <sub>2</sub> O) <sub>6</sub> ] <sub>2</sub> B <sub>6</sub> O <sub>11</sub> ·3H <sub>2</sub> O                                                                |
| 29385    | 2.080 Å | Abbona, F.; Calleri, M.; Ivaldi, G. <i>Acta Crystallogr. Sect. B</i> <b>1984</b> , 40, 223. NH <sub>4</sub> [Mg(H <sub>2</sub> O) <sub>6</sub> ]PO <sub>4</sub>                                                                                                          |
| 419836   | 2.080 Å | Weil, M. <i>Cryst. Res. Technol.</i> <b>2008</b> , 43, 1286. Tl[Mg(H <sub>2</sub> O) <sub>6</sub> ]AsO <sub>4</sub>                                                                                                                                                      |
| FETHAO   | 2.080 Å | Yang, Q.; Gao, S.; Huo, L. H. <i>Acta Crystallogr., Sect. E</i> <b>2005</b> , 61, m277. [Mg(H <sub>2</sub> O) <sub>6</sub> ]C <sub>10</sub> H <sub>8</sub> O <sub>6</sub>                                                                                                |
| HONGOH   | 2.080 Å | Karaghiosoff, K.; Klapotke, T. M.; Sabate, C. M. <i>Eur. J. Inorg. Chem.</i> <b>2009</b> , 238. [Mg(H <sub>2</sub> O) <sub>6</sub> ]C <sub>2</sub> H <sub>2</sub> N <sub>10</sub> ·0.5H <sub>2</sub> O                                                                   |
| 22335    | 2.081 Å | Rumanova, I. M.; Ashirov, A. <i>Kristallografiya</i> <b>1963</b> , 8, 517-532; <i>Am. Mineral.</i> <b>1956</b> , 41, 927-927. [Mg(H <sub>2</sub> O) <sub>6</sub> ] <sub>2</sub> B <sub>6</sub> O <sub>11</sub> ·3H <sub>2</sub> O                                        |
| 112808   | 2.081 Å | Yuan, F.; Hu, L.; Bai, Z.; Liu, L.; Huang, Y.; Zhang, L.; Wei, D.; Lin, Z. <i>Inorg. Chem.</i> <b>2021</b> , 60, 8103. NH <sub>4</sub> [Mg(H <sub>2</sub> O) <sub>6</sub> ]PO <sub>4</sub>                                                                               |
| FAPFOR   | 2.081 Å | Shibahara, T.; Kuroya, H.; Matsumoto, K.; Ooi, S. <i>Inorg. Chim. Acta</i> <b>1986</b> , 116, L25. [Mg(H <sub>2</sub> O) <sub>6</sub> ] <sub>2</sub> [MoC <sub>20</sub> H <sub>24</sub> N <sub>4</sub> O <sub>16</sub> S <sub>4</sub> ]·10H <sub>2</sub> O               |
| IFOYAE   | 2.081 Å | Chekhlov, A. N. <i>Koord. Khim.</i> <b>2007</b> , 33, 578. [Mg(H <sub>2</sub> O) <sub>6</sub> ]Br <sub>2</sub> ·C <sub>12</sub> H <sub>24</sub> O <sub>6</sub> ·2H <sub>2</sub> O                                                                                        |
| JAPFOV   | 2.081 Å | Kariuki, B. M.; Jones, W. <i>Acta Crystallogr., Sect. C</i> <b>1989</b> , 45, 1297. [Mg(H <sub>2</sub> O) <sub>6</sub> ](C <sub>8</sub> H <sub>5</sub> O <sub>4</sub> ) <sub>2</sub>                                                                                     |
| 750      | 2.082 Å | Fugel, M.; Malaspina, L. A.; Pal, R.; Thomas, S. P.; Shi, M. W.; Spackman, M. A.; Sugimoto, K.; Grabowsky, S. <i>Chem. Eur. J.</i> <b>2019</b> , 25, 6523. NH <sub>4</sub> [Mg(H <sub>2</sub> O) <sub>6</sub> ]PO <sub>4</sub>                                           |
| 2524     | 2.082 Å | Flack, H. D. <i>Acta Crystallogr., Sect. B</i> <b>1973</b> , 29, 656. [Mg(H <sub>2</sub> O) <sub>6</sub> ]SO <sub>3</sub>                                                                                                                                                |
| 4303     | 2.082 Å | Suesse, P. <i>Neues Jahrbuch fuer Mineralogie. Monatshefte</i> <b>1975</b> , 27-40. Na[Mg(H <sub>2</sub> O) <sub>6</sub> ] <sub>2</sub> Fe <sub>5</sub> (SO <sub>4</sub> ) <sub>7</sub> (OH) <sub>6</sub> ·21H <sub>2</sub> O                                            |
| 23662    | 2.082 Å | Suesse, P. <i>Neues Jahrbuch fuer Mineralogie. Monatshefte</i> <b>1970</b> , 286. [Mg(H <sub>2</sub> O) <sub>6</sub> ]Fe <sub>4</sub> (SO <sub>4</sub> ) <sub>6</sub> (OH) <sub>2</sub> ·14H <sub>2</sub> O                                                              |
| 60626    | 2.082 Å | Ferraris, G.; Fuess, H.; Joswig, W. <i>Acta Crystallogr., Sect. B</i> <b>1986</b> , 42, 253. NH <sub>4</sub> [Mg(H <sub>2</sub> O) <sub>6</sub> ]PO <sub>4</sub>                                                                                                         |
| JAPFUB   | 2.082 Å | Kariuki, B. M.; Jones, W. <i>Acta Crystallogr., Sect. C</i> <b>1989</b> , 45, 1297. [Mg(H <sub>2</sub> O) <sub>6</sub> ](C <sub>8</sub> H <sub>5</sub> O <sub>4</sub> ) <sub>2</sub> ·2H <sub>2</sub> O                                                                  |
| FUJGOI   | 2.082 Å | Zou, J. H.; Cui, H. J.; Xu, B.; Zhu, D. L.; Li, Q. Y.; Yang, G. W.; Hua, Y. C. <i>Inorg. Chim. Acta</i> <b>2014</b> , 423a, 430. [Mg(H <sub>2</sub> O) <sub>6</sub> ](C <sub>7</sub> H <sub>5</sub> N <sub>6</sub> O <sub>2</sub> ) <sub>2</sub> ·H <sub>2</sub> O       |
| RAFQIC   | 2.082 Å | Ksikisi, R.; Jendoubi, I.; Chebbi, H.; Graia, M.; Zid, M. F. <i>Zh. Strukt. Khim.</i> <b>2021</b> , 62, 1243. (C <sub>6</sub> H <sub>14</sub> N <sub>2</sub> ) <sub>2</sub> [Mg(H <sub>2</sub> O) <sub>6</sub> ][V <sub>10</sub> O <sub>28</sub> ]·8H <sub>2</sub> O     |
| 40750    | 2.083 Å | Miller, S. A.; Taylor, J. C. <i>Z. Kristallogr.</i> <b>1986</b> , 177, 247. [Mg(H <sub>2</sub> O) <sub>6</sub> ](UO <sub>2</sub> ) <sub>2</sub> (PO <sub>4</sub> ) <sub>2</sub> ·4H <sub>2</sub> O                                                                       |

|          |         |                                                                                                                                                                                                                                                                                                        |
|----------|---------|--------------------------------------------------------------------------------------------------------------------------------------------------------------------------------------------------------------------------------------------------------------------------------------------------------|
| 48111    | 2.083 Å | Montgomery, H. <i>Acta Crystallogr., Sect. C</i> <b>1984</b> , <i>40</i> , 14. Cs <sub>2</sub> [Mg(H <sub>2</sub> O) <sub>6</sub> ](CrO <sub>4</sub> ) <sub>2</sub>                                                                                                                                    |
| 48115    | 2.083 Å | Anderson, L.; Lindqvist, O.; Moret, J. <i>Acta Crystallogr., Sect. C</i> <b>1984</b> , <i>40</i> , 586. [Mg(H <sub>2</sub> O) <sub>6</sub> ]SeO <sub>3</sub>                                                                                                                                           |
| NUHROY   | 2.083 Å | Indrani, M.; Ramasubramanian, R.; Fronczek, F. R.; Braga, D.; Vasanthacharya, N. Y.; Kumaresan, S. <i>J. Chem. Sci (Bangalore)</i> <b>2009</b> , <i>121</i> , 413. [Mg(H <sub>2</sub> O) <sub>6</sub> ](C <sub>8</sub> H <sub>8</sub> NO <sub>3</sub> S) <sub>2</sub>                                  |
| OKUTUL01 | 2.083 Å | Huskic, I.; Pekov, I. V.; Krivovichev, S. V.; Friscic, T. <i>Sci. Adv.</i> <b>2016</b> , <i>2</i> , e16000621. [Mg(H <sub>2</sub> O) <sub>6</sub> ][FeNaC <sub>6</sub> O <sub>12</sub> ]·3H <sub>2</sub> O                                                                                             |
| 23881    | 2.084 Å | Nardelli, M.; Fava, G.; Giraldi, G. <i>Acta Crystallogr.</i> <b>1962</b> , <i>15</i> , 227. [Mg(H <sub>2</sub> O) <sub>6</sub> ]S <sub>2</sub> O <sub>3</sub>                                                                                                                                          |
| 120226   | 2.086 Å | Rincke, C.; Schmidt, H.; Voigt, W. <i>Acta Crystallogr., Sect. C</i> <b>2020</b> , <i>76</i> , 244. [Mg(H <sub>2</sub> O) <sub>6</sub> ]CO <sub>3</sub>                                                                                                                                                |
| OKUVAT01 | 2.086 Å | Huskic, I.; Pekov, I. V.; Krivovichev, S. V.; Friscic, T. <i>Sci. Adv.</i> <b>2016</b> , <i>2</i> , e16000621.                                                                                                                                                                                         |
| VINFEF   | 2.087 Å | Wu, B.-D.; Zhang, T.-L.; Li, Y.-L.; Zhou, Z.-N.; Yang, L.; Zhang, J.-G. <i>Main Group Chem.</i> <b>2013</b> , <i>12</i> , 185. [Mg(H <sub>2</sub> O) <sub>6</sub> ](2,4,6-C <sub>6</sub> H <sub>2</sub> (NO <sub>2</sub> ) <sub>3</sub> O) <sub>2</sub> ·4C <sub>2</sub> H <sub>4</sub> N <sub>4</sub> |
| YOZTUE   | 2.087 Å | Bensegueni, M. A.; Cherouana, A.; Dahaoui, S. <i>Acta Crystallogr., Sect. C</i> <b>2015</b> , <i>71</i> , 222. [Mg(H <sub>2</sub> O) <sub>6</sub> ](C <sub>5</sub> H <sub>3</sub> N <sub>6</sub> )                                                                                                     |
| 250196   | 2.087 Å | Cherkasova, T. G.; Tatarinova, E. S.; Cherkasova, E. V. <i>Zh. Strukt. Khim.</i> <b>2004</b> , <i>49</i> , 1161. [Mg(H <sub>2</sub> O) <sub>6</sub> ]SiF <sub>6</sub>                                                                                                                                  |
| 32528    | 2.087 Å | Mathew, M.; Kingsbury, P.; Tagaki, S.; Brown, W. E. <i>Acta Crystallogr., Sect B</i> <b>1982</b> , <i>38</i> , 40-44. [Mg(H <sub>2</sub> O) <sub>6</sub> ]PO <sub>4</sub> ·H <sub>2</sub> O                                                                                                            |
| 47161    | 2.087 Å | Agron, P. A.; Busing, W. R. <i>Acta Crystallogr., Sect. C</i> <b>1985</b> , <i>41</i> , 8-10. [Mg(H <sub>2</sub> O) <sub>6</sub> ]Cl <sub>2</sub>                                                                                                                                                      |
| MGHBZA10 | 2.090 Å | Nadzhafov, G. N.; Mamedov, Kh. S.; Shnulin, A. N.; Movsumov, E. M.; Amiraslanov, I. R.; Usabaliev, B. T.; Akhmedov, A. I. <i>Dokl. Akad. Nauk Az. SSSR</i> <b>1980</b> , <i>36</i> , 36. [Mg(H <sub>2</sub> O) <sub>6</sub> ](p-OOCC <sub>6</sub> H <sub>4</sub> OH) <sub>2</sub> ·2H <sub>2</sub> O   |
| MGHBZA20 | 2.090 Å | Shnulin, A. N.; Nadzhafov, G. N.; Amiraslanov, I. R.; Usabaliev, B. T.; Mamedov, K. S. <i>Koord. Khim.</i> <b>1981</b> , <i>7</i> , 1409. [Mg(H <sub>2</sub> O) <sub>6</sub> ](p-OOCC <sub>6</sub> H <sub>4</sub> OH) <sub>2</sub> ·2H <sub>2</sub> O                                                  |
| 48114    | 2.091 Å | Anderson, L.; Lindqvist, O.; Moret, J. <i>Acta Crystallogr., Sect. C</i> <b>1984</b> , <i>40</i> , 586-589. [Mg(H <sub>2</sub> O) <sub>6</sub> ]TeO <sub>3</sub>                                                                                                                                       |
| LONQIP   | 2.091 Å | Wang, J.-G.; Kang, H.-X.; Qin, J.-H. <i>Z. Kristallogr. – New Cryst Struct.</i> <b>2008</b> , <i>223</i> , 445. [Mg(H <sub>2</sub> O) <sub>6</sub> ]C <sub>14</sub> H <sub>8</sub> N <sub>2</sub> O <sub>4</sub> ·C <sub>12</sub> H <sub>10</sub> N <sub>2</sub> ·2H <sub>2</sub> O                    |
| OCEQIW   | 2.091 Å | Radanovic, D. J.; Ama, T.; Kawaguchi, H.; Draskovic, N. S.; Ristanovic, D. M.; Janicijevic, S. <i>Bull. Chem. Soc. Jpn.</i> <b>2001</b> , <i>74</i> , 701. [Mg(H <sub>2</sub> O) <sub>6</sub> ][NiC <sub>11</sub> H <sub>14</sub> N <sub>2</sub> O <sub>8</sub> ]·2H <sub>2</sub> O                    |
| 26772    | 2.092 Å | Kannan, K. K.; Viswamitra, M. A. <i>Z. Kristallogr., Kristallgeom., Kristallphys., Kristallchem.</i> <b>1965</b> , <i>122</i> , 161-174. K <sub>2</sub> [Mg(H <sub>2</sub> O) <sub>6</sub> ](SO <sub>4</sub> ) <sub>2</sub>                                                                            |
| 760112   | 2.092 Å | Yang, J.; Yin, X.; Wu, L.; Wu, J.; Zhang, J.; Gozin, M. <i>Inorg. Chem.</i> <b>2018</b> , <i>57</i> , 15105. [Mg(H <sub>2</sub> O) <sub>6</sub> ](CH <sub>2</sub> N <sub>5</sub> O) <sub>2</sub>                                                                                                       |
| DIRXUA   | 2.092 Å | Yang, J.; Yin, X.; Wu, L.; Wu, J.; Zhang, J.; Gozin M. <i>Inorg. Chem.</i> <b>2018</b> , <i>57</i> , 15105. [Mg(H <sub>2</sub> O) <sub>6</sub> ](CH <sub>2</sub> N <sub>5</sub> O) <sub>2</sub>                                                                                                        |

|          |         |                                                                                                                                                                                                                                                                                               |
|----------|---------|-----------------------------------------------------------------------------------------------------------------------------------------------------------------------------------------------------------------------------------------------------------------------------------------------|
| GUMPEJ   | 2.092 Å | Radanovic, D. J.; Ama, T.; Guresic, D. M.; Ristanovic, D. M.; Radanovic, D. D.; Kawaguchi, H. <i>Bull. Chem. Soc. Jpn.</i> <b>2000</b> , <i>73</i> , 2283. $[\text{Mg}(\text{H}_2\text{O})_6][\text{CuC}_{11}\text{H}_{14}\text{N}_2\text{O}_8]\cdot 2\text{H}_2\text{O}$                     |
| KIDLUF   | 2.092 Å | Mastropietro, T. F.; Armentano, D.; Marino, N.; De Munno, G.; Anastassopoulou, J.; Theophanides, T. <i>Cryst. Growth Des.</i> <b>2007</b> , <i>7</i> , 609. $[\text{Mg}(\text{H}_2\text{O})_6]\text{Cl}_2\cdot (\text{C}_5\text{H}_7\text{N}_3\text{O})_2\cdot 3\text{H}_2\text{O}$           |
| MGEDTA10 | 2.094 Å | Pozhidaev, A. I.; Polynova, T. N.; Porai-Koshits, M. A.; Logvinenko, V. A. <i>Zh. Strukt. Khim.</i> <b>1973</b> , <i>14</i> , 746. $[\text{Mg}(\text{H}_2\text{O})_6][\text{MgC}_{10}\text{H}_{14}\text{N}_2\text{O}_9]\cdot 2\text{H}_2\text{O}$                                             |
| KIZYUQ   | 2.095 Å | Qu, Y. X.; Zhang, Y. Q.; Zhou, K. Z.; Wei, L. T.; Zhan, L. L.; Cheng, S. Y.; Tao, Z.; Ma, P. H. <i>Chem Sel.</i> <b>2017</b> , <i>2</i> , 4360. $[\text{Mg}((\text{H}_2\text{O})_6)[\text{ZnCl}_3(\text{H}_2\text{O})](\text{C}_5\text{H}_6\text{N}_2\text{O}_{12})\cdot 9\text{H}_2\text{O}$ |
| NANMAS   | 2.095 Å | Xu, Y.; Che, Y.-X.; Cheng, F.-Y.; Zhen, J.-M. <i>Eur. J. Inorg. Chem.</i> <b>2011</b> , 5299. $[\text{Mg}(\text{H}_2\text{O})_6][\text{La}_2\text{Mg}_2\text{C}_{24}\text{H}_{24}\text{O}_{30}]\cdot 6\text{H}_2\text{O}$                                                                     |
| ZEJDOL   | 2.095 Å | Audebrand, N.; Demont, A.; El Osta, R.; Mironov, Y. V.; Naumov, N. G.; Cordier, S. <i>Molecules</i> <b>2021</b> , <i>26</i> , 2662. $[\text{Mg}(\text{H}_2\text{O})_6][\text{Re}_6\text{C}_8\text{H}_{13}\text{N}_4\text{O}_4\text{S}_8]\cdot 17\text{H}_2\text{O}$                           |
| TUWXIT   | 2.097 Å | Abrahams, B. F.; FitzGerald, N. J.; Robson, R. <i>Angew. Chem, Int. Ed.</i> <b>2010</b> , <i>49</i> , 2896. $[\text{Mg}(\text{H}_2\text{O})_6]_3[\text{Mg}_3\text{C}_8\text{H}_7\text{O}_4\text{V}_6]\cdot 46\text{H}_2\text{O}$                                                              |
| 16664    | 2.099 Å | Corbridge, D. E. C. <i>Acta Crystallogr.</i> <b>1956</b> , <i>9</i> , 991-994. $[\text{Mg}(\text{H}_2\text{O})_6]\text{HPO}_3$                                                                                                                                                                |
| 37198    | 2.099 Å | Brodersen, K.; Pezzei, G.; Thiele, G. Z. <i>Anorg. Allg. Chem.</i> <b>1983</b> , <i>502</i> , 209. $[\text{Mg}(\text{H}_2\text{O})_6][\text{Hg}_2\text{Br}_6]$                                                                                                                                |
| 192137   | 2.099 Å | Mueller, Melanie; Dinnebier, Robert E.; Dippel, Ann-Christin; Stokes, Harold T.; Campbell, Branton J. <i>J. Appl. Crystallogr.</i> <b>2014</b> , <i>47</i> , 532. $\text{Rb}[\text{Mg}(\text{H}_2\text{O})_6]\text{Br}_3$                                                                     |
| HMTMGC10 | 2.101 Å | Dahan, F. <i>Acta Crystallogr., Sect. B</i> <b>1974</b> , <i>30</i> , 22. $[\text{Mg}(\text{H}_2\text{O})_6]\text{Cr}_2\text{O}_7\cdot 2\text{C}_6\text{H}_{12}\text{N}_4$                                                                                                                    |
| 2818     | 2.102 Å | Syoyama, S.; Osaki, K. <i>Acta Crystallogr., Sect. B</i> <b>1972</b> , <i>28</i> , 2626. $[\text{Mg}(\text{H}_2\text{O})_6]\text{SiF}_6$                                                                                                                                                      |
| LATNUS   | 2.104 Å | Sohmiya, A.; Okuyama, T.; Suzuki, R.; Yamanishi, K.; Sugimoto, K.; Kondo, M. <i>Chem. Lett.</i> <b>2017</b> , <i>46</i> , 485. $[\text{Mg}(\text{H}_2\text{O})_6][\text{MgC}_{46}\text{H}_{32}\text{Cl}_{14}\text{O}_{14}]\cdot 6\text{H}_2\text{O}$                                          |
| 427801   | 2.106 Å | Abdija, Z.; Najdoski, M.; Koleva, V.; Runcevski, T.; Dinnebier, R. E.; Soptrajanov, B.; Stefov, V. Z. <i>Anorg. Allg. Chem.</i> <b>2014</b> , <i>640</i> , 3177. $\text{K}[\text{Mg}(\text{H}_2\text{O})_6]\text{AsO}_4$                                                                      |
| 419423   | 2.107 Å | Dinnebier, R. E.; Liebold-Ribeiro, Y.; Jansen, M. Z. <i>Anorg. Allg. Chem.</i> <b>2008</b> , <i>634</i> , 1857. $\text{Rb}[\text{Mg}(\text{H}_2\text{O})_6]\text{B}_3$                                                                                                                        |
| 419421   | 2.108 Å | Dinnebier, R. E.; Liebold-Ribeiro, Y.; Jansen, M. Z. <i>Anorg. Allg. Chem.</i> <b>2008</b> , <i>634</i> , 1857. $\text{Rb}[\text{Mg}(\text{H}_2\text{O})_6]\text{B}_3$                                                                                                                        |
| EMETAS   | 2.108 Å | Tamasi, G.; Berrettini, F.; Hursthouse, M. B.; Cini, R. <i>Open Crystallogr. J.</i> <b>2010</b> , <i>3</i> , 1. $[\text{Mg}(\text{H}_2\text{O})_6](\text{C}_{10}\text{H}_{10}\text{N}_3)_2[\text{MgC}_{20}\text{H}_{26}\text{N}_{10}\text{O}_{26}\text{P}_6]\cdot 6\text{H}_2\text{O}$        |
| FOJWOQ   | 2.108 Å | Castellato, U.; Guerriero, P.; Tamburini, S.; Vigato, P. A. <i>Inorg. Chim. Acta</i> <b>1987</b> , <i>134</i> , 165. $[\text{Mg}(\text{H}_2\text{O})_6][\text{Th}_2\text{C}_{60}\text{H}_{36}\text{Cl}_3\text{N}_6\text{O}_9]_2$                                                              |

|        |         |                                                                                                                                                                                                                                                                                                                                |
|--------|---------|--------------------------------------------------------------------------------------------------------------------------------------------------------------------------------------------------------------------------------------------------------------------------------------------------------------------------------|
| 79821  | 2.111 Å | Lutoslawska-Rogoz, J.; Kapturkiewicz-Kowal, E.; Hodorowicz, S. A. <i>Cryst. Res. Technol.</i> <b>1995</b> , <i>30</i> , 255-262. $[\text{Mg}(\text{H}_2\text{O})_6](\text{BrO}_3)_2$                                                                                                                                           |
| 248633 | 2.113 Å | Chen, X.; Li, Y.-H.; Alexander, A.-M.; Gallucci, J. C.; Hwang, S.-J.; Lingam, H. K.; Huang, Z.; Wang, C.; Li, H.; Zhao, Q.; Ozkan, U. S.; Shore, S. G.; Zhao, J.-C. <i>Chem. Eur. J.</i> <b>2014</b> , <i>20</i> , 7325. $[\text{Mg}(\text{H}_2\text{O})_6]\text{B}_{12}\text{H}_{12}$                                         |
| DENBOR | 2.113 Å | Yong Hu, Y.; Lu, Z.-J.; Dong, W.-S.; Zhang, J.-G.; Sinditskii, V. P. <i>New. J. Chem.</i> <b>2022</b> , <i>46</i> , 13874. $[\text{Mg}(\text{H}_2\text{O})_6](\text{C}_6\text{H}_3\text{N}_{10}\text{O}_3)_2 \cdot 8\text{H}_2\text{O}$                                                                                        |
| 2549   | 2.114 Å | Galigne, J. L.; Dumas, Y. <i>Acta Crystallogr., Sect. B</i> <b>1973</b> , <i>29</i> , 1115-1119. $[\text{Mg}(\text{H}_2\text{O})_6](\text{H}_2\text{PO}_2)_2$                                                                                                                                                                  |
| DECDIY | 2.118 Å | Cini, R.; Burla, M. C.; Nunzi, A.; Polidori, G. P.; Zanazzi, P. F. <i>J. Chem. Soc., Dalton Trans.</i> <b>1984</b> , 2467. $[\text{Mg}(\text{H}_2\text{O})_6](\text{C}_{10}\text{H}_{10}\text{N}_3)_2[\text{MgC}_{20}\text{H}_{26}\text{N}_{10}\text{O}_{26}\text{P}_6] \cdot 12\text{H}_2\text{O}$                            |
| CIYFIB | 2.119 Å | Rivera, A.; Rohlicek, J.; Sadat-Bernal, J.; Rios-Motta, J.; Dusek, M. Z. <i>Krist. Cryst. Mater.</i> <b>2014</b> , <i>229</i> , 319. $[\text{Mg}(\text{H}_2\text{O})_6]\text{Br}_2 \cdot (\text{C}_7\text{H}_{14}\text{N}_4)_2 \cdot 4\text{H}_2\text{O}$                                                                      |
| NALFEO | 2.120 Å | Marino, N.; Armentano, D.; De Munno, G. <i>Inorg. Chim. Acta</i> <b>2016</b> , <i>452</i> , 229. $[\text{Mg}(\text{H}_2\text{O})_6]\text{Br}_2 \cdot 2(\text{C}_5\text{H}_7\text{N}_3\text{O})_2$                                                                                                                              |
| 18167  | 2.123 Å | Scavnicar, S.; Prodic, B. <i>Acta Crystallogr.</i> <b>1965</b> , <i>18</i> , 698-702. $[\text{Mg}(\text{H}_2\text{O})_6]\text{Th}(\text{NO}_3)_6 \cdot 2\text{H}_2\text{O}$                                                                                                                                                    |
| GUCSEE | 2.126 Å | Sene, S.; Begu, S.; Gervais, C.; Renaudin, G.; Mesbah, A.; Smith, M. E.; Hubert Mutin, P.; van der Lee, A.; Nedelec, J.-M.; Bonhomme, C.; Laurencin, D. <i>Chem. Mater.</i> <b>2015</b> , <i>27</i> , 1242. $[\text{Mg}(\text{H}_2\text{O})_6][\text{MgC}_{14}\text{H}_{24}\text{B}_2\text{O}_{10}] \cdot 4\text{H}_2\text{O}$ |
| 419422 | 2.127 Å | Dinnebier, R. E.; Liebold-Ribeiro, Y.; Jansen, M. Z. <i>Anorg. Allg. Chem.</i> <b>2008</b> , <i>634</i> , 1857. $\text{Cs}[\text{Mg}(\text{H}_2\text{O})_6]\text{B}_3$                                                                                                                                                         |
| 16007  | 2.132 Å | Bigoli, F.; Manotti Lanfredi, A. M.; Tiripicchio, A.; Tiripicchio Camellini, M. <i>Acta Crystallogr., Sect. B</i> <b>1970</b> , <i>26</i> , 1075-1079. $[\text{Mg}(\text{H}_2\text{O})_6]\text{H}_3\text{IO}_6$                                                                                                                |
| 24250  | 2.137 Å | West, C.D., <i>Z. Kristallogr., Kristallgeom., Kristallphys., Kristallchem.</i> <b>1935</b> , <i>91</i> , 480. $[\text{Mg}(\text{H}_2\text{O})_6](\text{ClO}_4)_2$                                                                                                                                                             |
| TUHMIT | 2.138 Å | Peli, G. Masciocchi, N.; Garlaschelli, L.; Aprea, A.; Maspero, A. <i>Inorg. Chim. Acta</i> <b>2009</b> , <i>362</i> , 4630. $[\text{Mg}(\text{H}_2\text{O})_6]\text{C}_8\text{H}_4\text{N}_8$                                                                                                                                  |
| 188928 | 2.140 Å | Demartin, F.; Gramaccioli, C. M.; Campostrini, I.; Castellano, C. <i>Miner. Magazine</i> <b>2011</b> , <i>75</i> , 2847. $[\text{Mg}(\text{H}_2\text{O})_6][\text{Al}(\text{H}_2\text{O})_5\text{F}]_{12}(\text{SO}_4)_{12}(\text{HSO}_4)_2$                                                                                   |
| 26745  | 2.147 Å | Andress, K. R.; Gundermann, J. Z. <i>Kristallogr., Kristallgeom., Kristallphys., Kristallchem.</i> <b>1934</b> , <i>87</i> , 345. $[\text{Mg}(\text{H}_2\text{O})_6]\text{Br}_2$                                                                                                                                               |
| GAYLUN | 2.154 Å | Cini, R.; Marzilli, L. G. <i>Inorg. Chem.</i> <b>1988</b> , <i>27</i> , 1855. $[\text{Mg}(\text{H}_2\text{O})_6](\text{C}_{10}\text{H}_{10}\text{N}_3)_2[\text{ZnC}_{20}\text{H}_{26}\text{N}_{10}\text{O}_{26}\text{P}_6] \cdot 12\text{H}_2\text{O}$                                                                         |
| 28660  | 2.161 Å | Ferrari, A.; Colla, C. <i>Gazz. Chim.</i> <b>1937</b> , <i>67</i> , 294. $[\text{Mg}(\text{H}_2\text{O})_6]\text{H}_2\text{PO}_4$                                                                                                                                                                                              |
| 28663  | 2.161 Å | Ferrari, A.; Colla, C. <i>Gazz. Chim.</i> <b>1937</b> , <i>67</i> , 424. $[\text{Mg}(\text{H}_2\text{O})_6](\text{ClO}_2)_2$                                                                                                                                                                                                   |



|             |                               |                                                                                                                                                                                                                                                                                                                      |
|-------------|-------------------------------|----------------------------------------------------------------------------------------------------------------------------------------------------------------------------------------------------------------------------------------------------------------------------------------------------------------------|
| 26040       | 2.163 Å                       | Angoso, A.; Onken, H.; Hahn, H. <i>Z. Anorg. Allg. Chem.</i> <b>1964</b> , 328, 223. [Mg(H <sub>2</sub> O) <sub>6</sub> ]TeCl <sub>6</sub>                                                                                                                                                                           |
| DECDIY01    | 2.238 Å                       | Tamasi, G.; Berrettini, F.; Hursthouse, M. B.; Cini, R. <i>Open Crystallogr. J.</i> <b>2010</b> , 3, 1.<br>[Mg(H <sub>2</sub> O) <sub>6</sub> ](C <sub>10</sub> H <sub>10</sub> N <sub>3</sub> ) <sub>2</sub> [MgC <sub>20</sub> H <sub>26</sub> N <sub>10</sub> O <sub>26</sub> P <sub>6</sub> ]·12H <sub>2</sub> O |
| 26041       | 2.411 Å                       | Angoso, A.; Onken, H.; Hahn, H. <i>Z. Anorg. Allg. Chem.</i> <b>1964</b> , 328, 223. [Mg(H <sub>2</sub> O) <sub>6</sub> ]TeBr <sub>6</sub>                                                                                                                                                                           |
| <b>Mean</b> | <b>2.066 Å/521 structures</b> |                                                                                                                                                                                                                                                                                                                      |

**Table S1h.** Summary of solid state structures containing a hydrated calcium ion. The ICSD/CDS code refers to the code in the Inorganic Crystal Structure Database (ICSD, number) and Cambridge Structure Database (CSD, letters), respectively, and the mean Ca-O bond distance),  $d(\text{Ca-O})$ ;  $d(\text{Ca-O})_b$  denotes bridging ligands and  $d(\text{Ca-O})_t$  terminal ligands. Data in purple text are not included in the mean distance as they are uncertain or differ significantly from the mean value.

## Calcium(II)

### Four-coordination, square-planar configuration

| ICSD/CSD code | $d(\text{Ca-O})$           | Reference, compound formula                                                                                                                                                                                  |
|---------------|----------------------------|--------------------------------------------------------------------------------------------------------------------------------------------------------------------------------------------------------------|
| OYIDOS        | 2.253 Å                    | Jørgensen, M.; Zhou, W.; Wu, H.; Udovic, T. J.; Paskevicius, M.; Cerny, R.; Jensen, T. R. <i>Inorg. Chem.</i> <b>2021</b> , <i>60</i> , 10943. $[\text{Ca}(\text{H}_2\text{O})_4]\text{B}_{10}\text{H}_{10}$ |
| <b>Mean</b>   | <b>2.253 Å/1 structure</b> |                                                                                                                                                                                                              |

### Six-coordination, octahedral configuration

| ICSD/CSD code | $d(\text{Ca-O})$ | Reference, compound formula                                                                                                                                                                                                                                     |
|---------------|------------------|-----------------------------------------------------------------------------------------------------------------------------------------------------------------------------------------------------------------------------------------------------------------|
| YAZTEC        | 2.220 Å          | Zhu, J.; Fu, S.; Li, K.; Zeng, X.; Chen, S. <i>J. Thermal Anal Calorimetry</i> <b>2022</b> , <i>134</i> , 1873. $[\text{Ca}(\text{H}_2\text{O})_6](\text{C}_4\text{H}_4\text{N}_8\text{O}_2)_2 \cdot 6\text{H}_2\text{O}$                                       |
| ZUDLES        | 2.217 Å          | Urbanovsky, P.; Kotek, J.; Cisarova, I.; Hermann, P. <i>Dalton Trans.</i> <b>2020</b> , <i>49</i> , 1555. $[\text{Ca}(\text{H}_2\text{O})_6][\text{GdC}_{30}\text{H}_{42}\text{N}_5\text{O}_9\text{P}]_2 \cdot 6\text{H}_2\text{O}$                             |
| WANLII        | 2.306 Å          | Rajbanshi, A.; Custelcean, R. <i>Supramol. Chem.</i> <b>2012</b> , <i>24</i> , 65. $[\text{Ca}(\text{H}_2\text{O})_6]\text{SO}_4 \cdot \text{C}_{24}\text{H}_{30}\text{N}_{10}\text{O}_3$                                                                       |
| FELVEZ        | 2.309 Å          | Torres, J.; Gonzalez-Platas, J.; Sanchiz, J.; Castiglioni, J.; Dominguez, S.; Kremer, C. <i>Inorg. Chim. Acta</i> <b>2013</b> , <i>394</i> , 196. $[\text{Ca}(\text{H}_2\text{O})_6][\text{CaDyC}_{12}\text{H}_{12}\text{O}_{15}]_2 \cdot 3\text{H}_2\text{O}$  |
| WANLAA        | 2.312 Å          | Rajbanshi, A.; Custelcean, R. <i>Supramol. Chem.</i> <b>2012</b> , <i>24</i> , 65. $[\text{Ca}(\text{H}_2\text{O})_6]\text{CrO}_4 \cdot \text{C}_{24}\text{H}_{30}\text{N}_{10}\text{O}_3$                                                                      |
| WANLEE        | 2.313 Å          | Rajbanshi, A.; Custelcean, R. <i>Supramol. Chem.</i> <b>2012</b> , <i>24</i> , 65. $[\text{Ca}(\text{H}_2\text{O})_6]\text{SeO}_4 \cdot \text{C}_{24}\text{H}_{30}\text{N}_{10}\text{O}_3$                                                                      |
| GAYLOH        | 2.315 Å          | Cini, R.; Marzilli, L. G., <i>Inorg. Chem.</i> <b>1988</b> , <i>27</i> , 1855. $[\text{Ca}(\text{H}_2\text{O})_6](\text{C}_{10}\text{H}_{10}\text{N}_3)_2[\text{CdC}_{20}\text{H}_{26}\text{N}_{10}\text{O}_{26}\text{P}_6] \cdot 9\text{H}_2\text{O}$          |
| RALHAO01      | 2.315 Å          | Barnes, J. C. CCDC deposition number 265189, <b>2005</b> . $[\text{Ca}(\text{H}_2\text{O})_6](\text{C}_{10}\text{H}_{14}\text{BrO}_4\text{S})_2$                                                                                                                |
| FELWUQ        | 2.317 Å          | Torres, J.; Gonzalez-Platas, J.; Sanchiz, J.; Castiglioni, J.; Dominguez, S.; Kremer, C. <i>Inorg. Chim. Acta</i> <b>2013</b> , <i>394</i> , 196. $[\text{Ca}(\text{H}_2\text{O})_6][\text{CaYC}_{12}\text{H}_{12}\text{O}_{15}]_2 \cdot 3\text{H}_2\text{O}$ . |
| NOGLEA        | 2.320 Å          | Simonsen, O., <i>Acta Chem. Scand.</i> <b>1997</b> , <i>51</i> , 861. $[\text{Ca}(\text{H}_2\text{O})_6](\text{C}_4\text{H}_2\text{N}_3\text{O}_5)_2 \cdot 2\text{H}_2\text{O}$                                                                                 |
| FELWEA        | 2.321 Å          | Torres, J.; Gonzalez-Platas, J.; Sanchiz, J.; Castiglioni, J.; Dominguez, S.; Kremer, C. <i>Inorg. Chim. Acta</i> <b>2013</b> , <i>394</i> , 196. $[\text{Ca}(\text{H}_2\text{O})_6][\text{CaTbC}_{12}\text{H}_{12}\text{O}_{15}]_2 \cdot 3\text{H}_2\text{O}$  |
| FELVOJ        | 2.326 Å          | Torres, J.; Gonzalez-Platas, J.; Sanchiz, J.; Castiglioni, J.; Dominguez, S.; Kremer, C. <i>Inorg. Chim. Acta</i> <b>2013</b> , <i>394</i> , 196. $[\text{Ca}(\text{H}_2\text{O})_6][\text{CaEuC}_{12}\text{H}_{12}\text{O}_{15}]_2 \cdot 3\text{H}_2\text{O}$  |

|        |         |                                                                                                                                                                                                                                                                                                                                                    |
|--------|---------|----------------------------------------------------------------------------------------------------------------------------------------------------------------------------------------------------------------------------------------------------------------------------------------------------------------------------------------------------|
| RIHXIR | 2.327 Å | Suescun, L.; Wang, J.; Faccio, R.; Peinado, G.; Torres, J.; Kremer, C.; Burrow, R. A. <i>Powder Diffr.</i> <b>2012</b> , 27, 232. [Ca(H <sub>2</sub> O) <sub>6</sub> ][CaGdC <sub>12</sub> H <sub>12</sub> O <sub>15</sub> ] <sub>2</sub> ·4H <sub>2</sub> O                                                                                       |
| WITNAQ | 2.327 Å | Zhang, R. Zhao, Y.; Wang, J.; Ji, L.; Yang, X.-J.; Wu, B. <i>Cryst. Growth Des.</i> <b>2014</b> , 14, 544. [Ca(H <sub>2</sub> O) <sub>6</sub> ]Cl <sub>2</sub> ·C <sub>24</sub> H <sub>30</sub> N <sub>10</sub> O <sub>3</sub>                                                                                                                     |
| XEDFAO | 2.342 Å | Cetin, A.; Ziegler, C. J. <i>Dalton Trans.</i> <b>2006</b> , 1006. [Ca(H <sub>2</sub> O) <sub>6</sub> ](C <sub>12</sub> H <sub>16</sub> BN <sub>6</sub> S <sub>3</sub> ) <sub>2</sub> ·4H <sub>2</sub> O                                                                                                                                           |
| IBEPEN | 2.350 Å | Perkins, C. K.; Apblett, A. W. <i>Chem. Sel.</i> <b>2016</b> , 1, 3685. [Ca(H <sub>2</sub> O) <sub>6</sub> ][WO <sub>2</sub> (C <sub>4</sub> H <sub>6</sub> O <sub>3</sub> ) <sub>2</sub> ]                                                                                                                                                        |
| ZUDLIW | 2.361 Å | Urbanovsky, P.; Kotek, J.; Cisarova, I.; Hermann, P. <i>Dalton Trans.</i> <b>2020</b> , 49, 1555. [Ca(H <sub>2</sub> O) <sub>6</sub> ][HoC <sub>30</sub> H <sub>40</sub> N <sub>5</sub> O <sub>8</sub> P] <sub>2</sub> ·6H <sub>2</sub> O                                                                                                          |
| GAZZAM | 2.385 Å | Bindl, D.; Mandal, P. K.; Huc, I. <i>Chem. Eur. J.</i> <b>2022</b> , 28, e202200538. [Ca(H <sub>2</sub> O) <sub>6</sub> ] <sub>3</sub> [Ca <sub>3</sub> C <sub>198</sub> H <sub>182</sub> N <sub>36</sub> O <sub>78</sub> ] <sub>2</sub> ·14.8H <sub>2</sub> O                                                                                     |
| 113226 | 2.395 Å | Jørgensen, M.; Zhou, W.; Wu, H.; Udovic, T. J.; Paskevicius, M.; Cerny, R.; Jensen, T. R. <i>Inorg. Chem.</i> <b>2021</b> , 60, 10943. [Ca(H <sub>2</sub> O) <sub>6</sub> ]B <sub>10</sub> H <sub>10</sub>                                                                                                                                         |
| OYIDAE |         |                                                                                                                                                                                                                                                                                                                                                    |
| DECDOE | 2.396 Å | Cini, R.; Burla, M. C.; Nunzi, A.; Polidori, G. P.; Zanazzi, P. F., <i>J. Chem. Soc., Dalton Trans.</i> <b>1984</b> , 2467. [Ca(H <sub>2</sub> O) <sub>6</sub> ](C <sub>10</sub> H <sub>10</sub> N <sub>3</sub> ) <sub>2</sub> [CaC <sub>20</sub> H <sub>26</sub> N <sub>10</sub> O <sub>26</sub> P <sub>6</sub> ] <sub>2</sub> ·9H <sub>2</sub> O |
| HAGCOL | 2.420 Å | You, C. CCDC deposition number 2108252, <b>2021</b> . [Ca(H <sub>2</sub> O) <sub>6</sub> ] <sub>2</sub> [Cu <sub>8</sub> C <sub>40</sub> H <sub>12</sub> O <sub>36</sub> ]                                                                                                                                                                         |
| EMETEW | 2.464 Å | Tamasi, G.; Berrettini, F.; Hursthouse, M. B.; Cini, R. <i>Open Crystallogr. J.</i> <b>2010</b> , 3, 1. [Ca(H <sub>2</sub> O) <sub>6</sub> ](C <sub>10</sub> H <sub>10</sub> N <sub>3</sub> ) <sub>2</sub> [Ca(C <sub>20</sub> H <sub>28</sub> N <sub>10</sub> O <sub>26</sub> P <sub>6</sub> ) <sub>2</sub> ·8H <sub>2</sub> O                    |

**Mean 2.324 Å/15 structures**

#### Seven-coordination

| ICSD/CSD code | d(Ca-O) | Reference, compound formula                                                                                                                                                                                                                                 |
|---------------|---------|-------------------------------------------------------------------------------------------------------------------------------------------------------------------------------------------------------------------------------------------------------------|
| WIKXET        | 2.380 Å | Ojala, W. H.; Lu, L. K.; Albers, K. E.; Gleason, W. B.; Richardson, T. I.; Lovrien, R. E.; Sudbeck, E. A., <i>Acta Crystallogr., Sect. B</i> <b>1994</b> , 50, 684. [Ca(H <sub>2</sub> O) <sub>7</sub> ] <sup>2+</sup>                                      |
| NARKEY        | 2.383 Å | Yoshida, R.; Ogasahara, S.; Akashi, H.; Shibahara, T. <i>Inorg. Chim. Acta</i> <b>2012</b> , 383, 157. [Ca(H <sub>2</sub> O) <sub>7</sub> ][MoC <sub>6</sub> H <sub>10</sub> N <sub>2</sub> O <sub>6</sub> S <sub>4</sub> ] <sub>2</sub> ·H <sub>2</sub> O  |
| REMNAV        | 2.391 Å | Moers, O.; Blaschette, A.; Jones, P. G., <i>Acta Crystallogr., Sect. C</i> <b>1997</b> , 53, 845. [Ca(H <sub>2</sub> O) <sub>7</sub> ] <sup>2+</sup>                                                                                                        |
| EGOGIT        | 2.391 Å | Black, D. T.; Kennedy, A. R.; Lobato, K. M. <i>Acta Crystallogr., Sect. C</i> <b>2019</b> , 75, 633. [Ca(H <sub>2</sub> O) <sub>7</sub> ](C <sub>20</sub> H <sub>12</sub> N <sub>2</sub> O <sub>7</sub> S <sub>2</sub> ) <sub>2</sub> ·H <sub>2</sub> O     |
| HEPHOZ        | 2.392 Å | Shkol'nikova, L. M.; Porai-Koshits, M. A.; Poznyak, A. L., <i>Koord. Khim.</i> <b>1993</b> , 19, 683. [Ca(H <sub>2</sub> O) <sub>7</sub> ] <sup>2+</sup>                                                                                                    |
| EGOFEO        | 2.393 Å | Black, D. T.; Kennedy, A. R.; Lobato, K. M. <i>Acta Crystallogr., Sect. C</i> <b>2019</b> , 75, 633. [Ca(H <sub>2</sub> O) <sub>7</sub> ](C <sub>18</sub> H <sub>14</sub> N <sub>2</sub> O <sub>7</sub> S <sub>2</sub> ) <sub>2</sub> ·2.5 H <sub>2</sub> O |
| YIRVON        | 2.393 Å | Lacroix, M. R.; Bukovsky, E. V.; Lozinsek, M.; Folsom, T. C.; Newell, B. S.; Liu, Y.; Peryshkov, D. V.; Strauss, S. H. <i>Inorg. Chem.</i> <b>2018</b> , 57, 14983. [Ca(H <sub>2</sub> O) <sub>7</sub> ](B <sub>12</sub> F <sub>12</sub> )                  |

|             |                              |                                                                                                                                                                                                                                                                                                                 |
|-------------|------------------------------|-----------------------------------------------------------------------------------------------------------------------------------------------------------------------------------------------------------------------------------------------------------------------------------------------------------------|
| XAKFUL      | 2.396 Å                      | Okada, T.; Tanaka, K.; Shiro, M.; Shionoya, M. <i>Chem. Commun.</i> <b>2005</b> , 1484. [Ca(H <sub>2</sub> O) <sub>7</sub> ][Ag <sub>6</sub> Ca <sub>3</sub> C <sub>96</sub> H <sub>168</sub> N <sub>24</sub> O <sub>24</sub> S <sub>12</sub> ](CF <sub>3</sub> SO <sub>3</sub> ) <sub>14</sub>                 |
| WUKVEF      | 2.397 Å                      | Zhou, Q.; Qian, J.; Zhang, C. <i>J. Mol. Struct.</i> <b>2016</b> , <i>1119</i> , 340. [Ca(H <sub>2</sub> O) <sub>7</sub> ][CuC <sub>14</sub> H <sub>8</sub> N <sub>2</sub> O <sub>9</sub> ]·H <sub>2</sub> O                                                                                                    |
| RUMQOF      | 2.412 Å                      | Zasurskaya, L. A.; Pozdnyak, A. L.; Polynova, T. N.; Rybakov, V. B.; Porai-Koshits, M. A. <i>Zh. Neorg. Khim</i> <b>1996</b> , <i>41</i> , 1647. [Ca(H <sub>2</sub> O) <sub>7</sub> ][CoC <sub>10</sub> H <sub>12</sub> N <sub>2</sub> O <sub>8</sub> ] <sub>2</sub>                                            |
| GEBIC       | 2.414 Å                      | Mateus, P.; Wicher, B.; Ferrand, Y.; Huc, I. <i>Chem. Commun.</i> <b>2017</b> , 53, 9300. [Ca(H <sub>2</sub> O) <sub>7</sub> ](C <sub>161</sub> H <sub>151</sub> N <sub>35</sub> O <sub>26</sub> )                                                                                                              |
| AHAKEB      | 2.402 Å                      | Chen, B. CCDC deposition number 1414624, <b>2015</b> . (NH <sub>4</sub> ) <sub>2</sub> [Ca(H <sub>2</sub> O) <sub>7</sub> ] <sub>2</sub> (V <sub>10</sub> O <sub>28</sub> )·2H <sub>2</sub> O                                                                                                                   |
| CUPSUC      | 2.405 Å                      | Kennedy, A. R.; Andrikopoulos, P. C.; Arlin, J.-B.; Armstrong, D. R.; Duxbury, N.; Graham, D. V.; Kirkhouse, J. B. A. <i>Chem. Eur. J.</i> <b>2009</b> , <i>15</i> , 9494. [Ca(H <sub>2</sub> O) <sub>7</sub> ](C <sub>16</sub> H <sub>18</sub> N <sub>3</sub> O <sub>5</sub> S) <sub>2</sub> ·H <sub>2</sub> O |
| 29437       | 2.407 Å                      | Takagi, S.; Mathew, M.; Brown, W. E., <i>Acta Crystallogr., Sect. C</i> <b>1984</b> , <i>40</i> , 1111. NH <sub>4</sub> [Ca(H <sub>2</sub> O) <sub>7</sub> ][PO <sub>4</sub> ].                                                                                                                                 |
| 20719       | 2.409 Å                      | Solntsev, K. A.; Kuznetsov, N. T.; Ponomarev, V. I., <i>Iz. Akad. Nauk SSSR, Neorg. Mater.</i> <b>1976</b> , <i>12</i> , 1044-1048. [Ca(H <sub>2</sub> O) <sub>7</sub> ][B <sub>12</sub> H <sub>12</sub> ]·H <sub>2</sub> O.                                                                                    |
| ZZZKVU10    | 2.411 Å                      | Brown, C. J.; Ehrenberg, M.; Yadav, H. R., <i>Acta Crystallogr., Sect. C</i> <b>1984</b> , <i>40</i> , 58. [Ca(H <sub>2</sub> O) <sub>7</sub> ](C <sub>10</sub> H <sub>8</sub> NO <sub>3</sub> S) <sub>2</sub> ·H <sub>2</sub> O                                                                                |
| RUMQOF      | 2.412 Å                      | Zasurskaya, L.A. ; Pozdnyak, A. L.; Polynova, T. N.; Rybakov, V. B.; Porai-Koshits, M. A., <i>Zh. Neorg. Khim.</i> <b>1996</b> , <i>41</i> , 1647. [Ca(H <sub>2</sub> O) <sub>7</sub> ][CoC <sub>10</sub> H <sub>12</sub> N <sub>2</sub> O <sub>8</sub> ] <sub>2</sub>                                          |
| 32502       | 2.421 Å                      | Thomas, R.; Moore, F. H., <i>Acta Crystallogr., Sect. B</i> <b>1981</b> , <i>37</i> , 2156. [Ca(H <sub>2</sub> O) <sub>7</sub> ](I <sub>5</sub> ) <sub>2</sub> .                                                                                                                                                |
| <b>Mean</b> | <b>2.401 Å/18 structures</b> |                                                                                                                                                                                                                                                                                                                 |

*Eight-coordination, square antiprismatic configuration*

| ICSD/CSD code | <i>d</i> (Ca-O) | Reference, compound formula                                                                                                                                                                                                                                                              |
|---------------|-----------------|------------------------------------------------------------------------------------------------------------------------------------------------------------------------------------------------------------------------------------------------------------------------------------------|
| LIQRAE        | 2.417 Å*        | Shibahara, T.; Yoshida, S.; Maeyama, M.; Kojima, M.; <i>Bull. Chem. Soc. Jpn.</i> <b>1999</b> , <i>72</i> , 2271. [Ca(H <sub>2</sub> O) <sub>8</sub> ] <sup>2+</sup>                                                                                                                     |
| ZAYLET        | 2.420 Å         | Danylyuk, O. <i>CrystEngComm</i> <b>2017</b> , <i>19</i> , 3892. (C <sub>36</sub> H <sub>36</sub> N <sub>24</sub> O <sub>12</sub> ) <sub>2</sub> [Ca(H <sub>2</sub> O) <sub>8</sub> ](C <sub>4</sub> H <sub>8</sub> N <sub>2</sub> O <sub>3</sub> ) <sub>4</sub> Cl 15H <sub>2</sub> O - |
| 195938        | 2.458 Å         | Hennings, E.; Schmidt, H.; Voigt, W. <i>Acta Crystallogr., Sect. C</i> <b>2014</b> , <i>70</i> , 876. [Ca(H <sub>2</sub> O) <sub>8</sub> ]Br <sub>2</sub> ·H <sub>2</sub> O                                                                                                              |
| WUKXOS        | 2.461 Å         | Hong, Y.; Yufit, D. S.; Letzelter, N.; Steed, J. W. <i>CrystEngComm</i> <b>2020</b> , <i>22</i> , 2585. [Ca(H <sub>2</sub> O) <sub>8</sub> ][Ca(H <sub>2</sub> O) <sub>4</sub> (C <sub>9</sub> H <sub>8</sub> O <sub>8</sub> ) <sub>2</sub> ·2H <sub>2</sub> O                           |
| WUKXUY        | 2.463 Å         | Hong, Y.; Yufit, D. S.; Letzelter, N.; Steed, J. W. <i>CrystEngComm</i> <b>2020</b> , <i>22</i> , 2585. [Ca(H <sub>2</sub> O) <sub>8</sub> ][Ca(H <sub>2</sub> O) <sub>4</sub> (C <sub>9</sub> H <sub>8</sub> O <sub>8</sub> ) <sub>2</sub> ·2H <sub>2</sub> O                           |
| JAXZAM        | 2.472 Å         | Safin, D. A.; Railliet, A. P.; Robeyns, K.; Mitoraj, M. P.; Kubisiak, P.; Sagan, F.; Yann Garcia <i>New J. Chem.</i> <b>2017</b> , <i>41</i> , 6210. [Ca(H <sub>2</sub> O) <sub>8</sub> ](C <sub>3</sub> H <sub>2</sub> N <sub>7</sub> ) <sub>2</sub>                                    |

|             |                              |                                                                                                                                                                                                                                                     |
|-------------|------------------------------|-----------------------------------------------------------------------------------------------------------------------------------------------------------------------------------------------------------------------------------------------------|
| 30571       | 2.475 Å                      | Harr, T. E., <i>Thesis</i> , Univ. Syracuse (USA) <b>1947</b> , 1. $[\text{Ca}(\text{H}_2\text{O})_8]\text{O}_2$ .                                                                                                                                  |
| 32548       | 2.476 Å                      | Leligny, H.; Monier, J.-C., <i>Acta Crystallogr., Sect. B</i> <b>1982</b> , 38, 355-358. $[\text{Ca}(\text{H}_2\text{O})_8]_2[\text{Cd}_3\text{Cl}_{10}]\cdot 2\text{H}_2\text{O}$ .                                                                |
| 2832        | 2.477 Å                      | Dickens, B.; Brown, W. E., <i>Acta Crystallogr., Sect. B</i> <b>1972</b> , 28, 3056-3065. $\text{K}[\text{Ca}(\text{H}_2\text{O})_8](\text{AsO}_4)$ .                                                                                               |
| LIQREI      | 2.480 Å                      | Shibahara, T.; Yoshida, S.; Maeyama, M.; Kojima, M.; <i>Bull. Chem. Soc. Jpn.</i> <b>1999</b> , 72, 2271. $[\text{Ca}(\text{H}_2\text{O})_8](\text{Mo}_3\text{C}_{12}\text{H}_{15}\text{N}_3\text{O}_{12}\text{S}_4)\cdot 2\text{H}_2\text{O}$      |
| POXKIW      | 2.481 Å                      | Henke, K., Atwood, D. A., <i>Inorg. Chem.</i> <b>1998</b> , 37, 224. $(\text{C}_3\text{H}_2\text{N}_3\text{S}_3)_8[\text{Ca}(\text{H}_2\text{O})_8]_4\cdot 12\text{H}_2\text{O}$                                                                    |
| 250342      | 2.484 Å                      | Shilov, G. V.; Karelin, A. I.; Lemesheva, D. G.; Leonova, L. S.; Atovmyan, L. O. <i>Zh. Neorg. Khim.</i> <b>2005</b> , 50, 921. $[\text{Ca}(\text{H}_2\text{O})_8]\text{O}_2$                                                                       |
| LOJVUE      | 2.488 Å                      | Xanthopoulos, K.; Anagnostou, Z.; Chalkiadakis, S.; Choquesillo-Lazarte, D.; Mezei, G.; Zareba, J. K.; Zon, J.; Demadis, K. D. <i>Crystals</i> <b>2019</b> , 9, 301. $[\text{Ca}(\text{H}_2\text{O})_8](\text{C}_7\text{H}_9\text{NO}_3\text{P})_2$ |
| <b>Mean</b> | <b>2.474 Å/11 structures</b> |                                                                                                                                                                                                                                                     |

### Dimers

#### Six-coordination

| ICSD/CSD code | $d(\text{Ca}-\text{O})_b + d(\text{Ca}-\text{O})_t/d(\text{Ca}\cdots\text{Ca})$ | Reference, compound formula                                                                                                                                                                                                                                                                                                                                              |
|---------------|---------------------------------------------------------------------------------|--------------------------------------------------------------------------------------------------------------------------------------------------------------------------------------------------------------------------------------------------------------------------------------------------------------------------------------------------------------------------|
| SAXYOU        | 2.446 + 2.551 Å                                                                 | Mon, M.; Ferrando-Soria, J.; Verdaguer, M.; Train, C.; Paillard, C.; Dkhil, B.; Versace, C.; Bruno, R.; Armentano, D.; Pardo, E. <i>J. Am. Chem. Soc.</i> <b>2017</b> , 139, 8098. $[(\text{H}_2\text{O})_4\text{Ca}(\text{H}_2\text{O})_2\text{Ca}(\text{H}_2\text{O})_4][\text{Cu}_8\text{C}_{56}\text{H}_{55}\text{N}_{24}\text{O}_{31}]\cdot 54.8\text{H}_2\text{O}$ |
|               | 3.601 Å                                                                         |                                                                                                                                                                                                                                                                                                                                                                          |

#### Seven-coordination

| ICSD/CSD code | $d(\text{Ca}-\text{O})_b + d(\text{Ca}-\text{O})_t/d(\text{Ca}\cdots\text{Ca})$ | Reference, compound formula                                                                                                                                                                                                                                                                                                                           |
|---------------|---------------------------------------------------------------------------------|-------------------------------------------------------------------------------------------------------------------------------------------------------------------------------------------------------------------------------------------------------------------------------------------------------------------------------------------------------|
| NAKQUP        | 2.518 + 2.426 Å                                                                 | Mikuriya, M.; Nagao, N.; Kurahashi, S.; Tabuchi, A.; Tomohara, S.; Tsuboi, M.; Yoshioka, D.; Sakiyama, H.; Fuyuhiko, A. <i>J. Chem. Moldova</i> <b>2014</b> , 9, 100. $[(\text{H}_2\text{O})_4\text{Ca}(\text{H}_2\text{O})_3\text{Ca}(\text{H}_2\text{O})_4][\text{Mn}_4\text{C}_{26}\text{H}_{33}\text{N}_4\text{O}_{24}]\cdot 6\text{H}_2\text{O}$ |
|               | 3.673 Å                                                                         |                                                                                                                                                                                                                                                                                                                                                       |

#### Eight-coordination

| ICSD/CSD code | $d(\text{Ca}-\text{O})_b + d(\text{Ca}-\text{O})_t/d(\text{Ca}\cdots\text{Ca})$ | Reference, compound formula                                                                                                                                                                      |
|---------------|---------------------------------------------------------------------------------|--------------------------------------------------------------------------------------------------------------------------------------------------------------------------------------------------|
| YOHGAF        | 2.413 + 2.545 Å                                                                 | Hennings, E.; Schmidt, H.; Voigt, W. <i>Acta Crystallogr., Sect. C</i> <b>2014</b> , 70, 876. $[(\text{H}_2\text{O})_4\text{Ca}(\text{H}_2\text{O})_3\text{Ca}(\text{H}_2\text{O})_4]\text{I}_4$ |
| 195941        | 3.884 Å                                                                         |                                                                                                                                                                                                  |
| MINBOA        | 2.423 + 2.626 Å                                                                 | Hammerl, A.; Holl, G.; Klapotke, T. M.; Mayer, P.; Noth, H.; Piotrowski, H.; Warchhold, M. <i>Eur. J. Inorg.</i>                                                                                 |

|             |                                                                            |                                                                                                                                                                                                                                                                                                             |
|-------------|----------------------------------------------------------------------------|-------------------------------------------------------------------------------------------------------------------------------------------------------------------------------------------------------------------------------------------------------------------------------------------------------------|
|             | 4.380 Å                                                                    | <i>Chem.</i> <b>2002</b> , 834. [(H <sub>2</sub> O) <sub>6</sub> Ca(H <sub>2</sub> O) <sub>2</sub> Ca(H <sub>2</sub> O) <sub>6</sub> ](C <sub>2</sub> N <sub>10</sub> ) <sub>2</sub> ·2H <sub>2</sub> O                                                                                                     |
| YOHFOS      | 2.426 + 2.591 Å                                                            | Hennings, E.; Schmidt, H.; Voigt, W. <i>Acta Crystallogr., Sect. C</i> <b>2014</b> , 70, 876.<br>[(H <sub>2</sub> O) <sub>6</sub> Ca(H <sub>2</sub> O) <sub>2</sub> Ca(H <sub>2</sub> O) <sub>6</sub> ]I <sub>4</sub> ·2H <sub>2</sub> O                                                                    |
| 195939      | 4.339 Å                                                                    |                                                                                                                                                                                                                                                                                                             |
| YOHFUY      | 2.433 + 2.568 Å                                                            | Hennings, E.; Schmidt, H.; Voigt, W. <i>Acta Crystallogr., Sect. C</i> <b>2014</b> , 70, 876.<br>[(H <sub>2</sub> O) <sub>6</sub> Ca(H <sub>2</sub> O) <sub>2</sub> Ca(H <sub>2</sub> O) <sub>6</sub> ]I <sub>4</sub>                                                                                       |
| 195940      | 4.202 Å                                                                    |                                                                                                                                                                                                                                                                                                             |
| XAJNUV      | 2.435 + 2.584 Å                                                            | Wang, Y.; Yang, X.; Hu, J.; Li, H.; Li, Z.; Zhang, T. <i>New J. Chem.</i> <b>2020</b> , 44, 19054.<br>[(H <sub>2</sub> O) <sub>6</sub> Ca(H <sub>2</sub> O) <sub>2</sub> Ca(H <sub>2</sub> O) <sub>6</sub> ](C <sub>5</sub> H <sub>4</sub> N <sub>10</sub> O <sub>4</sub> ) <sub>2</sub> ·4H <sub>2</sub> O |
| <b>Mean</b> | <b>2.426 + 2.583 Å; mean all Ca-O bond distances: 2.540 Å/5 structures</b> |                                                                                                                                                                                                                                                                                                             |
|             | <b>4.212 Å</b>                                                             |                                                                                                                                                                                                                                                                                                             |

### ***Polymeric structures***

#### *Nine-coordination*

| ICSD/CSD code | $d(\text{Ca-O})_b + d(\text{Ca-O})_t/d(\text{Ca}\cdots\text{Ca})$ | Reference, compound formula                                                                                                                                |
|---------------|-------------------------------------------------------------------|------------------------------------------------------------------------------------------------------------------------------------------------------------|
| 59142         | 6*2.594+3*2.453 Å<br>3.955 Å                                      | Agron, P. A.; Busing, W. R. <i>Acta Crystallogr., Sect. C</i> <b>1986</b> , 42, 141.<br>[Ca(H <sub>2</sub> O) <sub>6</sub> ] <sub>n</sub> Cl <sub>2n</sub> |
| 1140          | 6*2.590+3*2.451 Å<br>3.954 Å                                      | Leclaire, A.; Borel, M. M. <i>Acta Crystallogr., Sect. C</i> <b>1977</b> , 33, 2938.<br>[Ca(H <sub>2</sub> O) <sub>6</sub> ] <sub>n</sub> Cl <sub>2n</sub> |
| 1141          | 6*2.622+3*2.466 Å<br>4.016 Å                                      | Leclaire, A.; Borel, M. M. <i>Acta Crystallogr., Sect. C</i> <b>1977</b> , 33, 2938.<br>[Ca(H <sub>2</sub> O) <sub>6</sub> ] <sub>n</sub> Br <sub>2n</sub> |
| <b>Mean</b>   | <b>6*2.602+3*2.457 Å/3 structures</b>                             |                                                                                                                                                            |

**Table S1i.** Summary of solid state structures containing a hydrated strontium ion. The ICSD/CDS code refers to the code in the Inorganic Crystal Structure Database (ICSD, number) and Cambridge Structure Database (CSD, letters), respectively, and the mean Sr-O bond distance,  $d(\text{Sr-O})$ ;  $d(\text{Sr-O})_b$  denotes bridging ligands and  $d(\text{Sr-O})_t$  terminal ligands. Data in purple text are not included in the mean distance as they are uncertain or differ significantly from the mean value.

## Strontium(II)

### *Six-coordination, octahedral configuration*

| ICSD/CSD code | $d(\text{Sr-O})$            | Reference, compound formula                                                                                                                                                                                                                                                         |
|---------------|-----------------------------|-------------------------------------------------------------------------------------------------------------------------------------------------------------------------------------------------------------------------------------------------------------------------------------|
| FEXVOX        | 2.460 Å                     | Savchenkov, A. V.; Vologzhanina, A. V.; Pushkin, D. V.; Serezhkina, L. B. <i>Eur. J. Inorg. Chem.</i> <b>2018</b> , 1867. $[\text{Sr}(\text{H}_2\text{O})_6][\text{NaU}_3\text{C}_{36}\text{H}_{63}\text{O}_{24}]$                                                                  |
| USATEO        | 2.505 Å                     | Chen, Y.; Zheng, L.; She, S.; Chen, Z.; Hu, B.; Li, Y. <i>Dalton Trans.</i> <b>2011</b> , 40, 4970. $[\text{Sr}(\text{H}_2\text{O})_6][\text{Cu}_4\text{SrC}_{32}\text{H}_{28}\text{N}_{16}\text{O}_{20}] \cdot 6\text{H}_2\text{O}$                                                |
| KOWFEJ        | 2.522 Å                     | Savchenkov, A. V.; Klepov, V. V.; Vologzhanina, A. V.; Serezhkina, L. B.; Pushkin, D. V.; Serezhkin, V. N. <i>CrystEngComm</i> <b>2015</b> , 17, 740. $[\text{Sr}(\text{H}_2\text{O})_6][\text{SrU}_2\text{C}_{12}\text{H}_{26}\text{O}_{20}]_2[\text{UC}_6\text{H}_9\text{O}_8]_2$ |
| <b>Mean</b>   | <b>2.496 Å/3 structures</b> |                                                                                                                                                                                                                                                                                     |

### *Eight-coordination, square antiprismatic configuration*

| ICSD/CSD code | $d(\text{Sr-O})$ | Reference, compound formula                                                                                                                                                                                                                                                                           |
|---------------|------------------|-------------------------------------------------------------------------------------------------------------------------------------------------------------------------------------------------------------------------------------------------------------------------------------------------------|
| 30572         | 2.578 Å          | Harr, T. E., <i>Thesis</i> , Univ. Syracuse (USA), <b>1947</b> , 1. $[\text{Sr}(\text{H}_2\text{O})_8]\text{O}_2$                                                                                                                                                                                     |
| EGOGOZ        | 2.581 Å          | Black, D. T.; Kennedy, A. R.; Lobato, K. M. <i>Acta Crystallogr., Sect. C</i> <b>2019</b> , 75, 633. $[\text{Sr}(\text{H}_2\text{O})_8](\text{C}_{20}\text{H}_{12}\text{N}_2\text{O}_7\text{S}_2) \cdot \text{H}_2\text{O}$                                                                           |
| 24689         | 2.597 Å          | Smith, H. G., <i>Acta Crystallogr.</i> <b>1953</b> , 6, 604. $[\text{Sr}(\text{H}_2\text{O})_8](\text{OH})_2$                                                                                                                                                                                         |
| VOGDUQ        | 2.600 Å          | Hardie, M. J.; Raston, C. L.; Salinas, A., <i>Chem. Commun.</i> <b>2001</b> , 1850. $[\text{Sr}(\text{H}_2\text{O})_8][\text{CoC}_4\text{H}_{22}\text{B}_{18}]_2 \cdot 4\text{C}_{27}\text{H}_{30}\text{O}_6 \cdot 4\text{CH}_3\text{CN} \cdot 4\text{H}_2\text{O}$                                   |
| XIJXEV        | 2.603 Å          | Bazhina, E. S.; Nikiforova, M. E.; Aleksandrov, G. G.; Efimov, N. N.; Kiskin, M. A.; Ugolkova, E. A.; Minin, V. V.; Sidorov, A. A.; Novotortsev, V. M.; Eremenko, I. L. <i>Russ. Chem. Bull.</i> <b>2012</b> , 1411. $[\text{Sr}(\text{H}_2\text{O})_8][\text{VO}(\text{C}_5\text{H}_6\text{O}_4)_2]$ |
| 237181        | 2.604 Å          | Kan, W. H.; Thangadurai, V. <i>Inorg. Chem.</i> <b>2012</b> , 51, 8973. $[\text{Sr}(\text{H}_2\text{O})_8](\text{OH})_2$                                                                                                                                                                              |
| LOJWAL        | 2.605 Å          | Xanthopoulos, K.; Anagnostou, Z.; Chalkiadakis, S.; Choquesillo-Lazarte, D.; Mezei, G.; Zareba, J. K.; Zon, J.; Demadis, K. D. <i>Crystals</i> <b>2019</b> , 9, 301. $[\text{Sr}(\text{H}_2\text{O})_8](\text{C}_7\text{H}_9\text{NO}_3\text{P})_2$                                                   |
| 35297         | 2.606 Å          | Thiele, G.; Brodersen, K.; Pezzei, G., <i>Z. Anorg. Allg. Chem.</i> <b>1982</b> , 491, 308. $[\text{Sr}(\text{H}_2\text{O})_8][\text{HgI}_4]$                                                                                                                                                         |

|           |         |                                                                                                                                                                                                                                                  |
|-----------|---------|--------------------------------------------------------------------------------------------------------------------------------------------------------------------------------------------------------------------------------------------------|
| GETSIII01 | 2.606 Å | Heinemann, F. W.; Meier, R. CCDC deposition number 2156426. $[\text{Sr}(\text{H}_2\text{O})_8][\text{Co}(\text{edta})]\cdot\text{H}_2\text{O}$                                                                                                   |
| 65086     | 2.607 Å | Thiele, G.; Putzas, D., <i>Z. Naturforsch., Teil B</i> <b>1988</b> , <i>43</i> , 1224. $[\text{Sr}(\text{H}_2\text{O})_8][\text{CdI}_4]$                                                                                                         |
| GETSII    | 2.609 Å | Zasurskaya, L. A.; Polyakova, I. N.; Rybakov, V. B.; Polynova, T. N.; Poznyak, A. L.; Sergienko, V. S. <i>Kristallografiya</i> <b>2006</b> , <i>51</i> , 481. $[\text{Sr}(\text{H}_2\text{O})_8][\text{Co}(\text{edta})]\cdot\text{H}_2\text{O}$ |
| POXKOC    | 2.614 Å | Henke, K.; Atwood, A. T., <i>Inorg. Chem.</i> <b>1998</b> , <i>37</i> , 224. $[\text{Sr}(\text{H}_2\text{O})_8](\text{C}_3\text{N}_3\text{H}_2\text{S}_3)\cdot\text{H}_2\text{O}$                                                                |
| 16385     | 2.619 Å | Geller, S.; Dudley, T.O., <i>J. Solid State Chem.</i> <b>1978</b> , <i>26</i> , 321-328. $[\text{Sr}(\text{H}_2\text{O})_8][\text{Ag}_2\text{I}_4]$                                                                                              |
| N/A       | 2.619 Å | Persson, I.; Sandström, M.; Yokoyama, H.; Chaudhry, M. <i>Z. Naturforsch., Ser. A</i> <b>1995</b> , <i>50</i> , 21. $[\text{Sr}(\text{H}_2\text{O})_8](\text{OH})_2$                                                                             |
| 417100    | 2.619 Å | Reuter, H.; Kamaha, S.; Zerzouf, O. <i>Z. Naturforsch., Ser. B</i> <b>2007</b> , <i>62</i> , 215. $[\text{Sr}(\text{H}_2\text{O})_8](\text{OH})_2$                                                                                               |
| 170825    | 2.620 Å | Ricci, J. S.; Stevens, R. C.; McMullan, R. K.; Klooster, W. T. <i>Acta Crystallogr., Sect. B</i> <b>2005</b> , <i>61</i> , 381. $[\text{Sr}(\text{H}_2\text{O})_8](\text{OH})_2$                                                                 |
| 94431     | 2.624 Å | Tiritiris, I.; Schleid, T., <i>Z. Anorg. Allg. Chem.</i> <b>2001</b> , <i>627</i> , 1836. $[\text{Sr}(\text{H}_2\text{O})_8][\text{B}_{12}\text{H}_{12}]$                                                                                        |
| 16430     | 2.630 Å | Lazarini, F.; Leban, I., <i>Acta Crystallogr., Sect. B</i> <b>1980</b> , <i>36</i> , 2745. $[\text{Sr}(\text{H}_2\text{O})_8][\text{Bi}_2\text{Br}_{10}]$                                                                                        |
| 200016    | 2.636 Å | Solntsev, K. A.; Kuznetsov, N. T.; Rannev, N. V.; Zavodnik, V. E., <i>Dokl. Akad. Nauk SSSR</i> <b>1977</b> , <i>232</i> , 1366. $[\text{Sr}(\text{H}_2\text{O})_7][\text{B}_{12}\text{H}_{12}]$ .                                               |
| 87465     | 2.637 Å | Mathew, M., <i>J. Chem. Crystallogr.</i> , <b>1998</b> , <i>10</i> , 741. $\text{K}[\text{Sr}(\text{H}_2\text{O})_8][\text{AsO}_4]$                                                                                                              |
| 24775     | 2.645 Å | Vannerberg, N.-G., <i>Arkiv Kemi</i> <b>1959</b> , <i>14</i> , 17. $[\text{Sr}(\text{H}_2\text{O})_8]\text{O}_2$                                                                                                                                 |
| 250017    | 2.667 Å | Pushcharovskii, D. Yu.; Suleimanov, E. V.; Pasero, M.; Merlino, S.; Barinova, A. V.; Alekseev, E. V., <i>Kristallografiya</i> <b>2003</b> , <i>48</i> , 246-249. $[\text{Sr}(\text{H}_2\text{O})_8][\text{AsUO}_6]$ .                            |
| 76004     | 2.683 Å | Preisinger, A. <i>Tschermaks Miner. Petrogr. Mitteilungen</i> <b>1954</b> , <i>5</i> , 123. $[\text{Sr}(\text{H}_2\text{O})_8](\text{OH})_2$                                                                                                     |

**2.613 Å/20 structures**

*Nine-coordination*

| <i>ICSD/CSD code</i> | <i>d(Sr-O)</i> | Reference, compound formula                                                                                                                                                        |
|----------------------|----------------|------------------------------------------------------------------------------------------------------------------------------------------------------------------------------------|
| 237723               | 2.656 Å        | Hennings, E.; Schmidt, H.; Voigt, W. <i>Acta Crystallogr., Sect. E</i> <b>2014</b> , <i>70</i> , 510. $[\text{Sr}(\text{H}_2\text{O})_7(\text{ClO}_4)_2]\cdot 2\text{H}_2\text{O}$ |

**Mean 2.656 Å/1 structure**

***Dimeric hydrates***



Nine-coordination

ICSD/CSD code  $d(\text{Sr-O})_b + d(\text{Sr-O})_v/d(\text{Sr}\cdots\text{Sr})$  Reference compound formula

|             |                                                     |                                                                                                                                                                   |
|-------------|-----------------------------------------------------|-------------------------------------------------------------------------------------------------------------------------------------------------------------------|
| 48110       | 6*2.709+3*2.563 Å<br>4.124 Å                        | English, R.B.; Nassimbeni, L.R. <i>Acta Crystallogr., Sect. C</i> <b>1984</b> , 40, 580. $[\text{Sr}(\text{H}_2\text{O})_6]_n\text{Cl}_{2n}$                      |
| 79713       | 6*2.714+ 3*2.553 Å<br>4.159 Å                       | Abrahams, I.; Vordemvenne, E. <i>Acta Crystallogr., Sect. C</i> <b>1995</b> , 51, 183. $[\text{Sr}(\text{H}_2\text{O})_6]_n\text{Br}_{2n}$                        |
| 59143       | 6*2.715+3*2.570 Å<br>4.124 Å                        | Agron, P.A.; Busing, W.R. <i>Acta Crystallogr., Sect. C</i> <b>1986</b> , 42, 141. $[\text{Sr}(\text{H}_2\text{O})_6]_n\text{Cl}_{2n}$                            |
| 25125       | 6*2.802+3*2.646 Å                                   | Jensen, A. T. <i>Matematisk-Fysiske Meddelelser - Kongelige Danske Videnskabernes Selskab</i> 1940, 17, 1-27. $[\text{Sr}(\text{H}_2\text{O})_6]_n\text{Cl}_{2n}$ |
| <b>Mean</b> | <b>6*2.713+3*2.562 Å/3 structures; mean 2.663 Å</b> |                                                                                                                                                                   |

**Table S1j.** Summary of solid state structures containing a hydrated barium ion. The ICSD/CDS code refers to the code in the Inorganic Crystal Structure Database (ICSD, number) and Cambridge Structure Database (CSD, letters), respectively, and the mean Ba-O bond distance),  $d(\text{Ba-O})$ ;  $d(\text{Ba-O})_b$  denotes bridging ligands and  $d(\text{Ba-O})_t$  terminal ligands. Data in purple text are not included in the mean distance as they are uncertain or differ significantly from the mean value.

## Barium(II)

### Six-coordination, octahedral configuration

| ICSD/CSD code | $d(\text{Ba-O})$ | Reference, compound formula                                                                                                                                                                                                                 |
|---------------|------------------|---------------------------------------------------------------------------------------------------------------------------------------------------------------------------------------------------------------------------------------------|
| FABDEU        | 2.798 Å*         | Li; J.; Wang; C.; Gao; X.; Zhao; F.; Zhao; K.; Fan; X.; Zhang; G.; Zhang; W.; Gao, <i>Z. Polyhedron</i> <b>2016</b> , <i>106</i> , 58. $[\text{Ba}(\text{H}_2\text{O})_6]^{2+}$ ?. At least seven-coordinate, most likely eight-coordinate. |

\* incomplete or distorted coordination sphere

### Eight-coordination, square antiprismatic configuration

| ICSD/CSD code | $d(\text{Ba-O})$            | Reference, compound formula                                                                                                                                                                        |
|---------------|-----------------------------|----------------------------------------------------------------------------------------------------------------------------------------------------------------------------------------------------|
| 34894         | 2.742 Å                     | Manohar, H.; Ramaseshan, S. <i>Z. Kristallogr.</i> <b>1964</b> , <i>119</i> , 357. $[\text{Ba}(\text{H}_2\text{O})_8](\text{OH})_2$                                                                |
| 30574         | 2.774 Å                     | Harr, T. E. <i>Thesis</i> , University of Syracuse, USA, <b>1947</b> , 1. $[\text{Ba}(\text{H}_2\text{O})_8]\text{O}_2$                                                                            |
| 33741         | 2.779 Å                     | Sacerdoti, M.; Bertolasi, V.; Ferretti, V.; Accorsi, C. A. <i>Z. Kristallogr.</i> <b>1990</b> , <i>192</i> , 111. $[\text{Ba}(\text{H}_2\text{O})_8](\text{OH})_2$                                 |
| MUNKUC        | 2.814 Å                     | Thuery, P. <i>Cryst. Growth Des.</i> <b>2009</b> , <i>9</i> , 5492. $[\text{Ba}(\text{H}_2\text{O})_8]_2[\text{Ba}_2\text{U}_8\text{C}_{120}\text{H}_{176}\text{O}_{68}]\cdot 8\text{H}_2\text{O}$ |
| <b>Mean</b>   | <b>2.777 Å/4 structures</b> |                                                                                                                                                                                                    |

### Nine-coordination

| ICSD/CSD code | $d(\text{Ba-O})$            | Reference, compound formula                                                                                                                                                                                                                           |
|---------------|-----------------------------|-------------------------------------------------------------------------------------------------------------------------------------------------------------------------------------------------------------------------------------------------------|
| 195744        | 2.826 Å                     | Thiele, G.; Vondung, L.; Donsbach, C.; Pulz, S.; Dehnen, S. <i>Z. Anorg. Allg. Chem.</i> <b>2014</b> , <i>640</i> , 2684. $[\text{Ba}(\text{H}_2\text{O})_3]\text{Se}_2$                                                                              |
| 426703        | 2.827 Å                     | Edhokkar, F.; Hadrich, A.; Mhiri, T.; Graia, M. <i>J. Mol. Struct.</i> <b>2014</b> , <i>1059</i> , 260. $\text{Na}[\text{Ba}(\text{H}_2\text{O})_9]\text{AsO}_4$ .                                                                                    |
| 20539         | 2.828 Å                     | Baturin, S.V.; Malinovskii, Yu.A.; Belov, N.V. <i>Doklady Akademii Nauk SSSR</i> <b>1982</b> , <i>266</i> , 624. $\text{Na}[\text{Ba}(\text{H}_2\text{O})_9]\text{PO}_4$                                                                              |
| FEDWEQ        | 2.845 Å                     | Harrowfield, J. M.; Sharma, R. P.; Skelton, B.W.; Venugopalam, P.; White, A.H. <i>Aust. J. Chem.</i> <b>1998</b> , <i>51</i> , 775. $[\text{Ba}(\text{H}_2\text{O})_8\text{NO}_2\text{-C}_6\text{H}_4\text{O}](p\text{-OC}_6\text{H}_4\text{NO}_2)_2$ |
| ICEKAD        | 2.874 Å                     | Deng; Y.-F.; Zhou; Z.-H.; Wan, H.-L. <i>Inorg. Chem.</i> <b>2004</b> , <i>43</i> , 6266. $(\text{NH}_4)_7[\text{Ba}(\text{H}_2\text{O})_9][\text{BaTiC}_{36}\text{H}_{39}\text{O}_{48}]$                                                              |
| 420481        | 2.901 Å                     | Kazmiercak, K.; Heck, J.G.; Hoeppe, H.A. <i>Z. Anorg. Allg. Chem.</i> <b>2010</b> , <i>636</i> , 409. $[\text{Ba}(\text{H}_2\text{O})_9]^{2+}$                                                                                                        |
| <b>Mean</b>   | <b>2.832 Å/4 structures</b> |                                                                                                                                                                                                                                                       |

### ***Dimeric hydrates***

#### *Nine-coordination*

| <i>ICSD/CSD code</i> | $d(\text{Ba-O})_b + d(\text{Ba-O})_i/d(\text{Ba}\cdots\text{Ba})$ | Reference, compound formula                                                                                                                                                                                                                                                                      |
|----------------------|-------------------------------------------------------------------|--------------------------------------------------------------------------------------------------------------------------------------------------------------------------------------------------------------------------------------------------------------------------------------------------|
| ECIVIY               | 2.866 + 2.783 Å<br>4.535 Å                                        | Xiuling Xu, Fan Hu, Qi Shuai, Q. <i>New J. Chem.</i> <b>2017</b> , <i>41</i> , 13319.<br>[(H <sub>2</sub> O) <sub>7</sub> Ba(H <sub>2</sub> O) <sub>2</sub> Ba(H <sub>2</sub> O) <sub>7</sub> ][FeC <sub>18</sub> H <sub>13</sub> O <sub>3</sub> ] $\cdot$ 12H <sub>2</sub> O                    |
| EFIZEZ               | 2.926 + 2.788 Å<br>4.049 Å                                        | Murugavel, R.; Kuppaswamy, S; Randoll, S. <i>Inorg. Chem.</i> <b>2008</b> , <i>47</i> , 6028.<br>[(H <sub>2</sub> O) <sub>5</sub> Ba(H <sub>2</sub> O) <sub>4</sub> Ba(H <sub>2</sub> O) <sub>5</sub> ](C <sub>12</sub> H <sub>17</sub> O <sub>4</sub> P) <sub>2</sub> $\cdot$ 4H <sub>2</sub> O |

#### *Ten-coordination*

| <i>ICSD/CSD code</i> | $d(\text{Ba-O})_b + d(\text{Ba}\cdots\text{Ba})_i/d(\text{Ba}\cdots\text{Ba})$ | Reference, compound formula                                                                                                                                                                                                                                                                                                      |
|----------------------|--------------------------------------------------------------------------------|----------------------------------------------------------------------------------------------------------------------------------------------------------------------------------------------------------------------------------------------------------------------------------------------------------------------------------|
| DAXCAI               | 2.920 + 2.805 Å<br>4.840 Å                                                     | Yu Hou; Rodriguez, M.A.; Nyman, M. <i>Cryst. Growth Des.</i> <b>2012</b> , <i>12</i> , 1422.<br>[(H <sub>2</sub> O) <sub>6</sub> Ba(H <sub>2</sub> O) <sub>4</sub> Ba(H <sub>2</sub> O) <sub>6</sub> ][Ba <sub>2</sub> Fe <sub>8</sub> C <sub>52</sub> H <sub>76</sub> N <sub>8</sub> O <sub>54</sub> ] $\cdot$ H <sub>2</sub> O |

**Table S1k.** Summary of solid state structures containing a hydrated scandium ion. The ICSD/CDS code refers to the code in the Inorganic Crystal Structure Database (ICSD, number) and Cambridge Structure Database (CSD, letters), respectively, and the mean Sc-O bond distance,  $d(\text{Sc-O})$ ;  $d(\text{Sc-O})_p$  denotes ligands forming the prism and  $d(\text{Sc-O})_c$  the capping ligands in dicapped trigonal prismatic configuration. Data in purple text are not included in the mean distance as they are uncertain or differ significantly from the mean value.

### Scandium(III)

#### Six-coordination

| ICSD/CSD code | $d(\text{Sc-O})$           | Reference, compound formula                                                                                                                                                                                                                                 |
|---------------|----------------------------|-------------------------------------------------------------------------------------------------------------------------------------------------------------------------------------------------------------------------------------------------------------|
| CEMXXAU       | 2.085 Å                    | Lindqvist-Reis, P.; Persson, I.; Sandström, M. <i>Dalton Trans.</i> <b>2006</b> , 3868. $[\text{Sc}(\text{H}_2\text{O})_6][\text{Sc}(\text{OSO}_2\text{CH}_3)_6]$                                                                                           |
| QUKXOJ        | 2.134 Å                    | Yan, C.; Lu, Z.; Wang, Z.; Liao, C. CCDC deposition number 103179, <b>2001</b> . $[\text{Sc}(\text{H}_2\text{O})_6][\text{Sc}_3\text{C}_{36}\text{H}_{78}\text{N}_6\text{O}_{16}](\text{OSO}_2\text{CH}_3)(\text{ClO}_4)_{11} \cdot 9.5 \text{H}_2\text{O}$ |
| <b>Mean</b>   | <b>2.085 Å/1 structure</b> |                                                                                                                                                                                                                                                             |

#### Seven-coordination

| ICSD/CSD code | $d(\text{Sc-O})$            | Reference, compound formula                                                                                                                                                                                                                                                              |
|---------------|-----------------------------|------------------------------------------------------------------------------------------------------------------------------------------------------------------------------------------------------------------------------------------------------------------------------------------|
| 252245        | 2.158 Å                     | Vander Hoogerstraete, T.; Brooks, N. R.; Onghena, B.; Van Meervelt, L.; Binnemans, K. <i>CrystEngComm</i> <b>2015</b> , <i>17</i> , 7142. $[\text{Sc}(\text{H}_2\text{O})_7](\text{N}(\text{SO}_2\text{CF}_3)_2)_3 \cdot \text{H}_2\text{O}$                                             |
| 91460         | 2.159 Å                     | Lim, K. C.; Skelton, B. W.; White, A. H. <i>Aust. J. Chem.</i> <b>2000</b> , <i>53</i> , 875. $[\text{Sc}(\text{H}_2\text{O})_7]\text{Cl}_3$                                                                                                                                             |
| 91461         | 2.161 Å                     | Lim, K. C.; Skelton, B. W.; White, A. H. <i>Aust. J. Chem.</i> <b>2000</b> , <i>53</i> , 875. $[\text{Sc}(\text{H}_2\text{O})_7]\text{Br}_3$                                                                                                                                             |
| 91462         | 2.161 Å                     | Lim, K. C.; Skelton, B. W.; White, A. H. <i>Aust. J. Chem.</i> <b>2000</b> , <i>53</i> , 875. $[\text{Sc}(\text{H}_2\text{O})_7]\text{I}_3$                                                                                                                                              |
| HOSFOK        | 2.166 Å                     | Waller, F. J.; Barrett, A. G. M.; Braddock, D. C.; Ramprasad, D.; McKinnell, R. M.; White, A. J. P.; Williams, D. J.; Ducray, R. <i>J. Org. Chem.</i> <b>1999</b> , <i>64</i> , 2910. $[\text{Sc}(\text{H}_2\text{O})_7](\text{C}(\text{SO}_2\text{CF}_3)_3)_3 \cdot \text{H}_2\text{O}$ |
| <b>Mean</b>   | <b>2.161 Å/5 structures</b> |                                                                                                                                                                                                                                                                                          |

#### Eight-coordination, dicapped trigonal prim

| ICSD/CSD code | $d(\text{Sc-O})_p + d(\text{Sc-O})_c$ | Reference, compound formula                                                                                                                                                                                                                                                   |
|---------------|---------------------------------------|-------------------------------------------------------------------------------------------------------------------------------------------------------------------------------------------------------------------------------------------------------------------------------|
| 415177        | 2.170 + 2.439 Å                       | Abbasi, A.; Lindqvist-Reis, P.; Eriksson, L.; Sandström, D.; Lidin, S.; Persson I.; Sandström, M. <i>Chem. Eur. J.</i> <b>2005</b> , <i>11</i> , 4065. $[\text{Sc}(\text{H}_2\text{O})_8](\text{CF}_3\text{SO}_3)_2)_3$                                                       |
| MATSIK01      |                                       | Castellani, C. B.; Carugo, O.; Giusti, M.; Sardone, N. <i>Eur. J. Solid State Inorg. Chem.</i> <b>1995</b> , <i>32</i> , 1089. $[\text{Sc}(\text{H}_2\text{O})_9](\text{CF}_3\text{SO}_3)_2)_3$ Comment: there is most likely only 2 water molecules in the capping positions |
| NINMIG        | 2.170 + 2.479 Å                       |                                                                                                                                                                                                                                                                               |

| Mean               | 2.170 + 2.459 Å/2 structures; mean 2.242 Å |                                                                                                                                                                                                                                                                            |
|--------------------|--------------------------------------------|----------------------------------------------------------------------------------------------------------------------------------------------------------------------------------------------------------------------------------------------------------------------------|
| 415181<br>MATSIK04 | 2.182 + 2.295+2.574 Å                      | Abbasi, A.; Lindqvist-Reis, P.; Eriksson, L.; Sandström, M. <i>Chem. Eur. J.</i> <b>2005</b> , <i>11</i> , 4065.<br>[Sc(H <sub>2</sub> O) <sub>8</sub> ](CF <sub>3</sub> SO <sub>3</sub> ) <sub>2</sub> ) <sub>3</sub> (100 K; mean Sc-O bond distance: 2.245 Å)           |
| MATSIK05           | 2.183 + 2.315 Å                            | Boyle, T. J.; Sears, J. M.; Neville, M. L.; Alam, T. M.; Young, V. G. <i>Inorg. Chem.</i> <b>2015</b> , <i>54</i> , 11831. [Sc(H <sub>2</sub> O) <sub>8</sub> ](CF <sub>3</sub> SO <sub>3</sub> ) <sub>3</sub> ·H <sub>2</sub> O (100 K; mean Sc-O bond distance: 2.216 Å) |

**Table S11.** Summary of solid state structures containing a hydrated yttrium ion. The ICSD/CDS code refers to the code in the Inorganic Crystal Structure Database (ICSD, number) and Cambridge Structure Database (CSD, letters), respectively, and the mean Y-O bond distance,  $d(\text{Y-O})$ ;  $d(\text{Y-O})_p$  denotes ligands forming the prism and  $d(\text{Y-O})_c$  the capping ligands in tricapped trigonal prismatic configuration. Data in purple text are not included in the mean distance as they are uncertain or differ significantly from the mean value.

### Yttrium(III)

#### *Eight-coordination, square antiprismatic configuration*

| ICSD/CSD code | $d(\text{Y-O})$ | Reference, compound formula                                                                                                                                                                                                                                                                                                   |
|---------------|-----------------|-------------------------------------------------------------------------------------------------------------------------------------------------------------------------------------------------------------------------------------------------------------------------------------------------------------------------------|
| BEDDOJ        | 2.336 Å         | Bukowska-Strzyzewska, M.; Tosik, A. <i>Acta Crystallogr., Sect. B</i> <b>1982</b> , 38, 950. $[\text{Y}(\text{H}_2\text{O})_8]\text{Cl}_3 \cdot 2\text{C}_{10}\text{H}_8\text{N}_2$                                                                                                                                           |
| WAKSOR        | 2.338 Å         | Tripol'skaya, A. A.; Geras'ko, O. A.; Naumov, D. Y.; Lipkowski, J.; Logvinenko, V. A.; Fedin, V. P. <i>Russ. J. Struct. Chem.</i> <b>2004</b> , 45, 284. $[\text{Y}(\text{H}_2\text{O})_8]_2(\text{NO}_3)_4(\text{HN}_2\text{O}_6)_2 \cdot (\text{C}_{36}\text{H}_{36}\text{N}_{24}\text{O}_{12}) \cdot 13\text{H}_2\text{O}$ |
| FIBJEH        | 2.341 Å         | Ling, I.; Sobolev, A. N.; Alias, Y.; Raston, C. L. <i>CrystEngComm</i> <b>2013</b> , 15, 2888. $[\text{Y}(\text{H}_2\text{O})_8](\text{C}_{14}\text{H}_{27}\text{N}_2)(\text{C}_6\text{H}_5)_3(\text{C}_6\text{H}_4\text{OCH}_3)\text{P}(\text{C}_{28}\text{H}_{19}\text{O}_{16}\text{S}_4) \cdot 8\text{H}_2\text{O}$        |
| FIBJOR        | 2.345 Å         | Ling, I.; Sobolev, A. N.; Alias, Y.; Raston, C. L. <i>CrystEngComm</i> <b>2013</b> , 15, 2888. $[\text{Y}(\text{H}_2\text{O})_8](\text{C}_{14}\text{H}_{27}\text{N}_2)(\text{C}_6\text{H}_5)_4\text{P}(\text{C}_{28}\text{H}_{19}\text{O}_{16}\text{S}_4) \cdot 12\text{H}_2\text{O}$                                         |
| NAJNEU        | 2.345 Å         | Falk, F.; Hackbarth, L.; Lochbrunner, S.; Marciniak, H.; Kockerling, M. <i>Eur. J. Inorg. Chem.</i> <b>2016</b> , 469. $[\text{Y}(\text{H}_2\text{O})_8](\text{B}(\text{CN})_4)_3 \cdot 2.32\text{H}_2\text{O}$                                                                                                               |
| KIMSAC        | 2.346 Å         | Dobrokhotova, Z. V.; Pertosyants, S. P.; Ilyukhin, A. B.; Novotortsev, V. M. <i>Russ Chem. Bull</i> <b>2012</b> , 2039. $[\text{Y}(\text{H}_2\text{O})_8]\text{Cl}_3 \cdot \text{C}_{12}\text{H}_{24}\text{O}_6 \cdot 4\text{H}_2\text{O}$                                                                                    |
| LOHCIW        | 2.346 Å         | Petosyants, S. P.; Ilyukhin, A. B. <i>Koord. Khim.</i> <b>2014</b> , 40, 379. $[\text{Y}(\text{H}_2\text{O})_8](\text{C}_{10}\text{H}_{10}\text{N}_2)\text{Cl}_5 \cdot \text{H}_2\text{O}$                                                                                                                                    |
| 421757        | 2.348 Å         | Rukk, N. S.; Albov, D. V.; Skryabina, A. Y.; Kravchenko, V. V.; Mavrin, B. N.; Zamalyutin, V. V.; Alikberova, L. Y. <i>Koord. Khim.</i> <b>2011</b> , 37, 643. $[\text{Y}(\text{H}_2\text{O})_8]\text{Br}_3 \cdot 2\text{H}_2\text{O}$                                                                                        |
| HISTAH        | 2.349 Å         | Ilyukhin, A.; Petosyants, S. CCDC deposition number 1542589, <b>2018</b> . $[\text{Y}(\text{H}_2\text{O})_8][\text{Ba}_2\text{Cl}_2(\text{C}_{12}\text{H}_{28}\text{O}_8)_2]\text{Cl}_5 \cdot \text{H}_2\text{O}$                                                                                                             |
| CEQMET        | 2.353 Å         | Chesnokov, G. A.; Topchiiy, M. A.; Asachenko, A. F.; Muravyev, N. V.; Grishin, L. I.; Nikiforova, A. S.; Utochnikova, V. V.; Rybakov, V. B.; Khrustalev, V. N.; Nechaev, M. S. <i>Eur. J. Inorg. Chem.</i> <b>2018</b> , 805. $[\text{Y}(\text{H}_2\text{O})_8]_2(\text{C}_2\text{N}_8)_3 \cdot 2\text{H}_2\text{O}$          |
| ZUJLOI        | 2.354 Å         | Zhang, B. CCDC deposition number 1978247, <b>2020</b> . $[\text{Y}(\text{H}_2\text{O})_8]\text{Cl}_3 \cdot 2(\text{C}_4\text{H}_8\text{O}_2)$                                                                                                                                                                                 |
| LOHCUI        | 2.356 Å         | Petosyants, S. P.; Ilyukhin, A. B. <i>Koord. Khim.</i> <b>2014</b> , 40, 379. $[\text{Y}(\text{H}_2\text{O})_8](\text{C}_{10}\text{H}_9\text{N}_2)\text{Cl}_4 \cdot \text{H}_2\text{O}$                                                                                                                                       |
| 87631         | 2.357 Å         | Junk, P. C.; Semenova, L. I.; Skelton, B. W.; White, A. H. <i>Aust. J. Chem.</i> <b>1999</b> , 52, 531. $[\text{Y}(\text{H}_2\text{O})_8]\text{Br}_3$                                                                                                                                                                         |
| FIBJAD        | 2.357 Å         | Ling, I.; Sobolev, A. N.; Alias, Y.; Raston, C. L. <i>CrystEngComm</i> <b>2013</b> , 15, 2888. $[\text{Y}(\text{H}_2\text{O})_8](\text{NH}_3\text{C}_{12}\text{H}_{25})(\text{C}_6\text{H}_5)_4\text{P}(\text{C}_{28}\text{H}_{19}\text{O}_{16}\text{S}_4) \cdot 10\text{H}_2\text{O}$                                        |

|             |                              |                                                                                                                                                                                                                                                                                                                                   |
|-------------|------------------------------|-----------------------------------------------------------------------------------------------------------------------------------------------------------------------------------------------------------------------------------------------------------------------------------------------------------------------------------|
| 156364      | 2.359 Å                      | Wang J. P.; Han Q. X.; Niu J. Y. <i>Jiegou Huaxue</i> <b>2006</b> , 25, 333. [Y(H <sub>2</sub> O) <sub>8</sub> ] <sub>2</sub> [V <sub>10</sub> O <sub>28</sub> ]·9H <sub>2</sub> O                                                                                                                                                |
| MINBUG      | 2.360 Å                      | Hammerl, A.; Holl, G.; Klapotke, T. M.; Mayer, P.; Noth, H.; Piotrowski, H.; Warchhold, M. <i>Eur. J. Inorg. Chem.</i> <b>2002</b> , 834. [Y(H <sub>2</sub> O) <sub>8</sub> ] <sub>2</sub> (C <sub>2</sub> N <sub>10</sub> ) <sub>3</sub> ·6H <sub>2</sub> O                                                                      |
| FAYVEG01    | 2.364 Å                      | Rogers, R. D.; Kurihara, L. K. <i>Inorg Chim. Acta</i> <b>1987</b> , 129, 277. [Y(H <sub>2</sub> O) <sub>8</sub> ]Cl <sub>3</sub> ·C <sub>10</sub> H <sub>20</sub> O <sub>6</sub>                                                                                                                                                 |
| VATJAD      | 2.364 Å                      | Qiao, C.-F.; Wei, Q.; Xia, Z.-Q.; Zhou, C.-S.; Chen, S.-P. <i>J. Therm. Anal. Calorimetry</i> <b>2012</b> , 107, 527. [Y(H <sub>2</sub> O) <sub>8</sub> ](C <sub>8</sub> H <sub>5</sub> N <sub>8</sub> ) <sub>3</sub> ·9H <sub>2</sub> O                                                                                          |
| RAHLOE      | 2.365 Å                      | Yamada, M.; Hamada, F. <i>Int. J. Soc. Mater. Eng. Resour.</i> <b>2014</b> , 20, 230. [Y(H <sub>2</sub> O) <sub>8</sub> ] <sub>2</sub> (C <sub>36</sub> H <sub>18</sub> O <sub>24</sub> S <sub>12</sub> )·16H <sub>2</sub> O                                                                                                      |
| FAYVEG02    | 2.366 Å                      | Lindqvist-Reis, P.; Walther, C.; Klenze, R.; Eichhofer, A.; Fanghanel, T. <i>J. Phys Chem B</i> <b>2006</b> , 110, 5279. [Y(H <sub>2</sub> O) <sub>8</sub> ]Cl <sub>3</sub> ·2C <sub>10</sub> H <sub>20</sub> O <sub>6</sub>                                                                                                      |
| FAYVEG      | 2.373 Å                      | Rogers, R. D.; Kurihara, L. K. <i>Inorg Chim. Acta</i> <b>1986</b> , 116, 171. [Y(H <sub>2</sub> O) <sub>8</sub> ]Cl <sub>3</sub> ·C <sub>10</sub> H <sub>20</sub> O <sub>6</sub>                                                                                                                                                 |
| VOGNOU      | 2.465 Å                      | Hardie, M. J.; Raston, C. L.; Salinas, A. <i>Chem. Commun.</i> <b>2001</b> , 1850. [Y(H <sub>2</sub> O) <sub>8</sub> ][Na(H <sub>2</sub> O) <sub>6</sub> ][Co(C <sub>2</sub> B <sub>9</sub> H <sub>11</sub> ) <sub>2</sub> ] <sub>4</sub> ·8C <sub>27</sub> H <sub>30</sub> O <sub>6</sub> ·8CH <sub>3</sub> CN·8H <sub>2</sub> O |
| <b>Mean</b> | <b>2.353 Å/21 structures</b> |                                                                                                                                                                                                                                                                                                                                   |

*Nine-coordination, tricapped trigonal prim*

| ICSD/CSD code | $d(Y-O)_p + d(Y-O)_c$                              | Reference, compound formula                                                                                                                                                                                      |
|---------------|----------------------------------------------------|------------------------------------------------------------------------------------------------------------------------------------------------------------------------------------------------------------------|
| BUVWAQ        | 2.344 + 2.525 Å                                    | Harrowfield, J. M.; Kepert, D. L.; Patrick, J. M.; White, A. H. <i>Aust. J. Chem.</i> <b>1983</b> , 36, 483. [Y(H <sub>2</sub> O) <sub>9</sub> (CF <sub>3</sub> SO <sub>3</sub> ) <sub>3</sub> ]                 |
| AYETHS01      | 2.368 + 2.517 Å                                    | Broach, R. W.; Williams, J. M.; Felcher, G. P.; Hinks, D. G. <i>Acta Crystallogr., Sect. B</i> <b>1979</b> , 35, 2317. [Y(H <sub>2</sub> O) <sub>9</sub> (SO <sub>3</sub> (OCH <sub>2</sub> CH <sub>3</sub> ))]. |
| 172190        | 2.371 + 2.434 Å                                    | Abbasi, A.; Eriksson, L. <i>Acta Crystallogr., Sect. E</i> <b>2006</b> , 62, i126. [Y(H <sub>2</sub> O) <sub>9</sub> ](BrO <sub>3</sub> ) <sub>3</sub>                                                           |
| 164698        | 2.371 + 2.446 Å                                    | Abbasi, A.; Badiiei, A. <i>Iran J. Chem. Chem. Eng.</i> <b>2007</b> , 26, 123. [Y(H <sub>2</sub> O) <sub>9</sub> ](BrO <sub>3</sub> ) <sub>3</sub>                                                               |
| <b>Mean</b>   | <b>2.364 + 2.481 Å (mean 2.403 Å)/4 structures</b> |                                                                                                                                                                                                                  |

**Table S1m.** Summary of solid state structures containing a hydrated lanthanum(III) ion. The ICSD/CDS code refers to the code in the Inorganic Crystal Structure Database (ICSD, number) and Cambridge Structure Database (CSD, letters), respectively, and the mean La-O bond distance,  $d(\text{La-O})$ ;  $d(\text{La-O})_p$  denotes ligands forming the prism and  $d(\text{La-O})_c$  the capping ligands in tricapped trigonal prismatic configuration. Data in purple text are not included in the mean distance as they are uncertain or differ significantly from the mean value.

### Lanthanum(III)

#### Six-coordination

| ICSD/CSD code | $d(\text{La-O})$ | Reference, compound formula                                                                                                              |
|---------------|------------------|------------------------------------------------------------------------------------------------------------------------------------------|
| 31756         | 2.301 Å          | Glaser, J.; Johansson, G., <i>Acta Chem. Scand., Ser. A</i> <b>1981</b> , 35, 639. $[\text{La}(\text{H}_2\text{O})_6](\text{ClO}_4)_3$ . |

#### Eight-coordination

| ICSD/CSD code | $d(\text{La-O})$ | Reference, compound formula                                                                                                                                                                                                                                                                          |
|---------------|------------------|------------------------------------------------------------------------------------------------------------------------------------------------------------------------------------------------------------------------------------------------------------------------------------------------------|
| UMOKEP        | 2.353 Å          | Tan, Y.-H. CCDC deposition number 911647, <b>2021</b> . $[\text{La}(\text{H}_2\text{O})_8](\text{C}_6\text{H}_4\text{N}_5)_3 \cdot 2\text{C}_6\text{H}_5\text{N}_5 \cdot 7\text{H}_2\text{O}$                                                                                                        |
| VOGJOQ        | 2.479 Å          | Hardie, M. J.; Raston, C. L.; Salinas, A. <i>Chem. Commun.</i> <b>2001</b> , 1850.<br>$[\text{La}(\text{H}_2\text{O})_8][\text{Na}(\text{H}_2\text{O})_8][\text{CoC}_4\text{H}_{22}\text{B}_{18}] \cdot 8\text{C}_{27}\text{H}_{30}\text{O}_6 \cdot 8\text{CH}_3\text{CN} \cdot 8\text{H}_2\text{O}$ |
| XIDZEQ        | 2.511 Å          | Dong, Y.-B.; Wang, P.; Ma, J.-P.; Zhao, X.-X.; Wang, H.-Y.; Tang, B.; Huang, R.-Q. <i>J. Am. Chem. Soc.</i> <b>2007</b> , 129, 4872. $[\text{La}(\text{H}_2\text{O})_8][\text{La}_2\text{C}_{64}\text{H}_{44}\text{N}_{16}\text{O}_{18}]\text{Cl} \cdot 2\text{H}_2\text{O}$                         |

**Mean**            **2.495 Å/2 structures**

#### Nine-coordination, tricapped trigonal prism

| ICSD/CSD code | $d(\text{La-O})_p + d(\text{La-O})_c$ | Reference, compound formula                                                                                                                                                                                                                                                  |
|---------------|---------------------------------------|------------------------------------------------------------------------------------------------------------------------------------------------------------------------------------------------------------------------------------------------------------------------------|
| 280944        | 2.451 + 2.523 Å                       | Peng, X.-H.; Li, Y.-Z.; Cai, L.X.; Wang, L.-F.; Wu, J.-G. <i>Acta Crystallogr., Sect. E</i> <b>2002</b> , 58, 111.<br>$[\text{La}(\text{H}_2\text{O})_9]_2[\text{V}_{10}\text{O}_{28}] \cdot 8\text{H}_2\text{O}$                                                            |
| BUVVIX01      | 2.513 + 2.611 Å                       | Chatterjee, A.; Maslen, E. N.; Watson, K. J. <i>Acta Crystallogr., Sect. B</i> <b>1988</b> , 44, 381.<br>$[\text{La}(\text{H}_2\text{O})_9](\text{CF}_3\text{SO}_3)_3$                                                                                                       |
| ZZZAQP01      | 2.517 + 2.615 Å                       | Gerkin, R. E.; Reppart, W. J. <i>Acta Crystallogr., Sect. C</i> <b>1984</b> , 40, 781. $[\text{La}(\text{H}_2\text{O})_9](\text{C}_2\text{H}_5\text{SO}_4)_3$                                                                                                                |
| 37206         | 2.519 + 2.619 Å                       | Harrowfield, J. Mc. B.; Kepert, D. L.; Patrick, J. M.; White, A. H. <i>Aust. J. Chem.</i> <b>1983</b> , 36, 483.<br>$[\text{La}(\text{H}_2\text{O})_9](\text{CF}_3\text{SO}_3)_3$                                                                                            |
| BUVVIX        |                                       |                                                                                                                                                                                                                                                                              |
| 419231        | 2.519 + 2.604 Å                       | Tiritiris, I.; Schleid, T. <i>Z. Anorg. Allg. Chem.</i> <b>2008</b> , 634, 1353. $(\text{H}_3\text{O})[\text{La}(\text{H}_2\text{O})_9]_2(\text{B}_{12}\text{H}_{12})_2\text{Cl}_2 \cdot \text{H}_2\text{O}$                                                                 |
| 424952        | 2.524 + 2.608 Å                       | Zhang, S.; Zhang, D.; Ma, P.; Liang, Y.; Wang, J.; Niu, J. <i>CrystEngComm</i> <b>2013</b> , 15, 2992.<br>$\text{Na}_{12}[\text{La}(\text{H}_2\text{O})_9]_2[\text{H}_4\text{W}_{17}\text{O}_{61}\text{P}_2(\text{La}(\text{H}_2\text{O})_4)_6] \cdot 100\text{H}_2\text{O}$ |
| 419232        | 2.527 + 2.617 Å                       | Tiritiris, I.; Schleid, T. <i>Z. Anorg. Allg. Chem.</i> <b>2008</b> , 634, 1353. $[\text{La}(\text{H}_2\text{O})_9]_2(\text{B}_{12}\text{H}_{12})_3 \cdot 15\text{H}_2\text{O}$                                                                                              |



|             |                                                     |                                                                                                                                                                                                                                                                                                                   |
|-------------|-----------------------------------------------------|-------------------------------------------------------------------------------------------------------------------------------------------------------------------------------------------------------------------------------------------------------------------------------------------------------------------|
| BOYZOH      | 2.533 + 2.565 Å                                     | Esteban-Parra, G. M.; Moscoso, I.; Ruiz, J. C.; Garcia, J. A.; Moreno, M. S.; Rodriguez-Dieguez, A.; Quiros, M. <i>Eur. J. Inorg. Chem.</i> <b>2020</b> , 308. [La(H <sub>2</sub> O) <sub>9</sub> ][La(NO <sub>3</sub> ) <sub>6</sub> ]·9C <sub>7</sub> H <sub>8</sub> N <sub>4</sub>                             |
| WUKJOD      | 2.537 + 2.649 Å                                     | Wu, Y.; Shi, R.; Wu, Y.-L.; Holcroft, J. M.; Liu, Z.; Frascioni, M.; Wasielewski, M. R.; Li, H.; Stoddart, J. F. <i>J. Am. Chem. Soc.</i> <b>2015</b> , 137, 4111. [La(H <sub>2</sub> O) <sub>9</sub> ][Mo <sub>12</sub> O <sub>40</sub> ]·2(C <sub>48</sub> H <sub>80</sub> O <sub>40</sub> )                    |
| WUKJIX      | 2.544 + 2.590 Å                                     | Wu, Y.; Shi, R.; Wu, Y.-L.; Holcroft, J. M.; Liu, Z.; Frascioni, M.; Wasielewski, M. R.; Li, H.; Stoddart, J. F. <i>J. Am. Chem. Soc.</i> <b>2015</b> , 137, 4111. [La(H <sub>2</sub> O) <sub>9</sub> ][Mo <sub>12</sub> O <sub>40</sub> ]·2(C <sub>42</sub> H <sub>70</sub> O <sub>35</sub> )·27H <sub>2</sub> O |
| FIKGEO      | 2.549 + 2.631 Å                                     | Zabrodina, G. S.; Katkova, M.A.; Samsonov, M. A.; Ketkov, S. Y. <i>Z. Anorg. Allg. Chem.</i> <b>2018</b> , 644, 907. [La(H <sub>2</sub> O) <sub>9</sub> ](OH)[Cu <sub>10</sub> La <sub>2</sub> C <sub>90</sub> H <sub>124</sub> N <sub>20</sub> O <sub>48</sub> S <sub>4</sub> ]·15H <sub>2</sub> O               |
| <b>Mean</b> | <b>2.528 + 2.611 Å/10 structures, mean: 2.556 Å</b> |                                                                                                                                                                                                                                                                                                                   |

#### Nine-coordination

| ICSD/CSD code   | <i>d</i> (La-O)              | Reference, compound formula                                                                                                                                                                                                                                                                                                                            |
|-----------------|------------------------------|--------------------------------------------------------------------------------------------------------------------------------------------------------------------------------------------------------------------------------------------------------------------------------------------------------------------------------------------------------|
| CEJFON          | 2.541 Å                      | Barnes, J. C. CCDC deposition number 606877, <b>2006</b> . [La(H <sub>2</sub> O) <sub>9</sub> ](ClO <sub>4</sub> ) <sub>3</sub> ·3C <sub>4</sub> H <sub>8</sub> O <sub>2</sub> ·2H <sub>2</sub> O                                                                                                                                                      |
| 91454           | 2.549 Å                      | Lim, K. C.; Skelton, B. W.; White, A. H. <i>Aust. J. Chem.</i> <b>2000</b> , 53, 867-873. [La(H <sub>2</sub> O) <sub>9</sub> ]I <sub>3</sub>                                                                                                                                                                                                           |
| ZILVIZ          | 2.551 Å                      | Steed, J. W.; Johnson, C. P.; Barnes, C. L.; Juneja, R. K.; Atwood, J. L.; Reilly, S.; Hollis, R. L.; Smith, P. H.; Clark, D. L. <i>J. Am. Chem. Soc.</i> <b>1995</b> , 117, 11426. Na <sub>2</sub> [La(H <sub>2</sub> O) <sub>9</sub> ](C <sub>35</sub> H <sub>25</sub> O <sub>20</sub> S <sub>5</sub> )·10H <sub>2</sub> O                           |
| SUDDAW          | 2.552 Å                      | Faithfull, D. L.; Harrowfield, J. M.; Ogden, M. I.; Skelton, B. W.; Third, K.; White, A. H. <i>Aust. J. Chem.</i> <b>1992</b> , 45, 583-594. [La(H <sub>2</sub> O) <sub>9</sub> ](C <sub>6</sub> H <sub>5</sub> CH <sub>2</sub> SO <sub>3</sub> ) <sub>3</sub> ·4H <sub>2</sub> O                                                                      |
| XENQUG          | 2.554 Å                      | Tabuchi, R.; Takezawa, H.; Fujita, M. <i>Angew. Chem., Int. Ed.</i> <b>2022</b> , 61, e202208866. [La(H <sub>2</sub> O) <sub>9</sub> ][Pd <sub>6</sub> C <sub>108</sub> H <sub>144</sub> N <sub>36</sub> ](C <sub>12</sub> H <sub>15</sub> O <sub>9</sub> S <sub>3</sub> ) <sub>4</sub> (NO <sub>3</sub> ) <sub>3</sub> ·43H <sub>2</sub> O            |
| NUTNIB          | 2.560 Å                      | Lindqvist-Reis, P.; Walther, C.; Klenze, R.; Edelstein, N. M. <i>J. Phys. Chem. C</i> <b>2009</b> , 113, 449. [La(H <sub>2</sub> O) <sub>9</sub> ]Cl <sub>3</sub> ·C <sub>10</sub> H <sub>20</sub> O <sub>5</sub> ·H <sub>2</sub> O                                                                                                                    |
| LEXVIW          | 2.561 Å                      | Salaam, J.; Tabti, L.; Bahamyirou, S. B.; Lecointre, A.; Alba, O. H.; Jeannin, O.; Camerel, F.; Cianferani, S.; Bentouhami, E.; Nonat, A. M.; Charbonniere, L. <i>J. Inorg. Chem.</i> <b>2018</b> , 57, 6095. [La(H <sub>2</sub> O) <sub>9</sub> ][LaC <sub>24</sub> H <sub>27</sub> N <sub>6</sub> O <sub>9</sub> P <sub>3</sub> ]·10H <sub>2</sub> O |
| LAGGOQ          | 2.562 Å                      | Quanzheng Zhang, Q.; Lu, C.; Yang, W.; Chen, S.; Yu, Y.; He, X.; Yan, Y.; Liu, J.; Xu, X.; Xia, C.; Chen, L.; Wu, W. <i>Polyhedron</i> <b>2004</b> , 23, 1975. (NH <sub>4</sub> )[La(H <sub>2</sub> O) <sub>9</sub> ][V <sub>2</sub> C <sub>12</sub> H <sub>12</sub> N <sub>2</sub> O <sub>15</sub> ]                                                  |
| VATHUV          | 2.562 Å                      | Qiao, C.-F.; Wei, Q.; Xia, Z.-Q.; Zhou, C.-S.; Chen, S.-P. <i>J. Thermal Anal. Calorimet.</i> <b>2012</b> , 107, 527. [La(H <sub>2</sub> O) <sub>9</sub> ](C <sub>8</sub> H <sub>5</sub> N <sub>8</sub> ) <sub>3</sub> ·9H <sub>2</sub> O                                                                                                              |
| <b>Mean</b>     | <b>2.555 Å/9 structures</b>  |                                                                                                                                                                                                                                                                                                                                                        |
| <b>Mean all</b> | <b>2.556 Å/19 structures</b> |                                                                                                                                                                                                                                                                                                                                                        |

**Table S1n.** Summary of solid state structures containing a hydrated cerium(III) ion. The ICSD/CDS code refers to the code in the Inorganic Crystal Structure Database (ICSD, number) and Cambridge Structure Database (CSD, letters), respectively, and the mean Ce-O bond distance,  $d(\text{Ce-O})$ ;  $d(\text{Ce-O})_p$  denotes ligands forming the prism and  $d(\text{Ce-O})_c$  the capping ligands in tricapped trigonal prismatic configuration. Data in purple text are not included in the mean distance as they are uncertain or differ significantly from the mean value.

### Cerium(III)

#### Eight-coordination

| ICSD/CSD code | $d(\text{Ce-O})$            | Reference, compound formula                                                                                                                                                                                                                                                |
|---------------|-----------------------------|----------------------------------------------------------------------------------------------------------------------------------------------------------------------------------------------------------------------------------------------------------------------------|
| XIDZIU        | 2.485 Å                     | Dong, Y.-B.; Wang, P.; Ma, J.-P.; Zhao, X.-X.; Wang, H.-Y.; Tang, B.; Huang, R.-Q. <i>J. Am. Chem. Soc.</i> <b>2007</b> , <i>129</i> , 4872. $[\text{Ce}(\text{H}_2\text{O})_8][\text{CeC}_{64}\text{H}_{44}\text{N}_{16}\text{O}_{18}]\text{Cl}\cdot 2\text{H}_2\text{O}$ |
| LEQFOG        | 2.542 Å                     | Lan, B.-L.; Luo, A.-Y.; Shao, B.; Gao, L.-N.; Wei, Q.; Liang, Y.-N.; Huang, J.; Zhang, Z. <i>Dalton Trans.</i> <b>2022</b> , <i>51</i> , 16158. $\text{H}_3\text{O}[\text{Ce}(\text{H}_2\text{O})_8][\text{NiC}_{15}\text{H}_{24}\text{N}_3\text{O}_6]_4$                  |
| <b>Mean</b>   | <b>2.514 Å/2 structures</b> |                                                                                                                                                                                                                                                                            |

#### Nine-coordination, tricapped trigonal prism

| ICSD/CSD code | $d(\text{Ce-O})_p + d(\text{Ce-O})_c$              | Reference, compound formula                                                                                                                                                  |
|---------------|----------------------------------------------------|------------------------------------------------------------------------------------------------------------------------------------------------------------------------------|
| BUVWEU01      | 2.491 + 2.594 Å                                    | Chatterjee, A.; Maslen, E. N.; Watson, K. J., <i>Acta Crystallogr., Sect. B</i> <b>1988</b> , <i>44</i> , 381. $[\text{Ce}(\text{H}_2\text{O})_6](\text{CF}_3\text{SO}_3)_3$ |
| CIBSAH        | 2.491 + 2.600 Å                                    | Gerkin, R. E.; Reppart, W. J., <i>Acta Crystallogr., Sect. C</i> <b>1984</b> , <i>40</i> , 781. $[\text{Ce}(\text{H}_2\text{O})_9](\text{C}_2\text{H}_5\text{SO}_4)_3$       |
| <b>Mean</b>   | <b>2.491 + 2.597 Å/2 structures, mean: 2.526 Å</b> |                                                                                                                                                                              |

#### Nine-coordination

| ICSD/CSD code | $d(\text{Ce-O})$ | Reference, compound formula                                                                                                                                                                                                                                                                                                                |
|---------------|------------------|--------------------------------------------------------------------------------------------------------------------------------------------------------------------------------------------------------------------------------------------------------------------------------------------------------------------------------------------|
| 421753        | 2.520 Å          | Rukk, N. S.; Albov, D. V.; Skryabina, A. Y.; Kravchenko, V. V.; Mavrin, B. N.; Zamalyutin, V. V.; Alikberova, L. Y. <i>Koord. Khim.</i> <b>2011</b> , <i>36</i> , 643. $[\text{Ce}(\text{H}_2\text{O})_9]\text{I}_3$                                                                                                                       |
| VOSVAD        | 2.523 Å          | Loh, S. L.; Sobolev, A. N.; Lim, S. H.; Ling, I. <i>CrystEngComm</i> <b>2020</b> , <i>22</i> , 52. $[\text{Ce}(\text{H}_2\text{O})_9]_4(\text{C}_{16}\text{H}_{20}\text{N}_4)_2(\text{C}_{28}\text{H}_{20}\text{O}_{16}\text{S}_4)_2\cdot 33\text{H}_2\text{O}$                                                                            |
| VOSVOR        | 2.529 Å          | Loh, S. L.; Sobolev, A. N.; Lim, S. H.; Ling, I. <i>CrystEngComm</i> <b>2020</b> , <i>22</i> , 52. $[\text{Ce}(\text{H}_2\text{O})_9][\text{HCe}(\text{H}_2\text{O})_4]_{0.33}(\text{C}_{16}\text{H}_{20}\text{N}_4)(\text{P}(\text{C}_6\text{H}_5)_4)_2(\text{C}_{28}\text{H}_{20}\text{O}_{16}\text{S}_4)_2\cdot 20.6\text{H}_2\text{O}$ |
| VOSTIJ        | 2.533 Å          | Loh, S. L.; Sobolev, A. N.; Lim, S. H.; Ling, I. <i>CrystEngComm</i> <b>2020</b> , <i>22</i> , 52. $\text{Na}[\text{Ce}(\text{H}_2\text{O})_9]_2(\text{C}_{22}\text{H}_{32}\text{N}_4)(\text{C}_{28}\text{H}_{20}\text{O}_{16}\text{S}_4)_2\text{Cl}$                                                                                      |

|                 |                              |                                                                                                                                                                                                                                                                                                                                                                            |
|-----------------|------------------------------|----------------------------------------------------------------------------------------------------------------------------------------------------------------------------------------------------------------------------------------------------------------------------------------------------------------------------------------------------------------------------|
| SUDDEA          | 2.535 Å                      | Faithfull, D. L.; Harrowfield, J. M.; Ogden, M. I.; Skelton, B. W.; Third, K.; White, A. H. <i>Aust. J. Chem.</i> <b>1992</b> , <i>45</i> , 583. [Ce(H <sub>2</sub> O) <sub>9</sub> ](C <sub>6</sub> H <sub>5</sub> CH <sub>2</sub> SO <sub>3</sub> ) <sub>3</sub> ·4H <sub>2</sub> O                                                                                      |
| COTPOR          | 2.538 Å                      | Zhang, Q.-Z. CCDC deposition number 238994, <b>2009</b> . NH <sub>4</sub> [Ce(H <sub>2</sub> O) <sub>9</sub> ][V <sub>2</sub> C <sub>12</sub> H <sub>12</sub> N <sub>2</sub> O <sub>15</sub> ]                                                                                                                                                                             |
| NEBNUG          | 2.541 Å                      | Das, D.; Guha, A. K. <i>Polyhedron</i> <b>2017</b> , <i>137</i> , 1. H <sub>3</sub> O[Ce(H <sub>2</sub> O) <sub>9</sub> ][V <sub>2</sub> C <sub>12</sub> H <sub>12</sub> N <sub>2</sub> O <sub>15</sub> ]                                                                                                                                                                  |
| 424952          | 2.542                        | Zhang, S.; Zhang, D.; Ma, P.; Liang, Y.; Wang, J.; Niu, J. <i>CrystEngComm</i> <b>2013</b> , <i>15</i> , 2992. Na <sub>24</sub> [Ce(H <sub>2</sub> O) <sub>9</sub> ] <sub>2</sub> [Ce(H <sub>2</sub> O) <sub>4</sub> ] <sub>6</sub> [H <sub>2</sub> P <sub>2</sub> W <sub>17</sub> O <sub>61</sub> ]·56H <sub>2</sub> O                                                    |
| 96528           | 2.543 Å                      | Yahyaoui, S.; Naili, H.; Ben Hassen, R.; Donadieu, B.; Daran, J. C.; Ben Salah, A. <i>J. Solid State Chem.</i> <b>2003</b> , <i>173</i> , 328. [Ce(H <sub>2</sub> O) <sub>9</sub> ][Cd <sub>4</sub> Cl <sub>11</sub> ]·4H <sub>2</sub> O                                                                                                                                   |
| BURSIR          | 2.545 Å                      | Kostakis, G. E.; Mondal, K. C.; Anson, C. E.; Powell, A. K. <i>Polyhedron</i> <b>2010</b> , <i>29</i> , 24. [Ce(H <sub>2</sub> O) <sub>9</sub> ] <sub>2</sub> (C <sub>8</sub> H <sub>5</sub> N <sub>8</sub> )(C <sub>8</sub> H <sub>4</sub> N <sub>8</sub> )·6H <sub>2</sub> O                                                                                             |
| XITXUW          | 2.555 Å                      | Katkova, M. A.; Kremlev, K.; Zabrodina, G.; Rumyantcev, R.; Gazhulina, A.; Gusev, S.; Ketkov, S. Y.; Fomina, I.; Eremenko, I. <i>Eur. J. Inorg. Chem.</i> <b>2019</b> , 1002. [Ce(H <sub>2</sub> O) <sub>9</sub> ] <sub>2</sub> [Ce <sub>2</sub> Cu <sub>10</sub> C <sub>90</sub> H <sub>122</sub> N <sub>20</sub> O <sub>47</sub> S <sub>4</sub> ](OH)·14H <sub>2</sub> O |
| <b>Mean</b>     | <b>2.536 Å/10 structures</b> |                                                                                                                                                                                                                                                                                                                                                                            |
| <b>Mean all</b> | <b>2.535 Å/12 structures</b> |                                                                                                                                                                                                                                                                                                                                                                            |

*Ten-coordination*

| ICSD/CSD code | <i>d</i> (Ce-O) | Reference, compound formula                                                                                                                                                                                                                                                               |
|---------------|-----------------|-------------------------------------------------------------------------------------------------------------------------------------------------------------------------------------------------------------------------------------------------------------------------------------------|
| NEYXEW        | 2.502 Å         | Zheng, Y.; Camara, M.; Daiguebonne, C.; Guillou, O.; Bernot, K.; Calvez, G.; Le Dret, F.; Kerbellec, N. <i>Inorg. Chim. Acta</i> <b>2013</b> , <i>401</i> , 11. [Ce(H <sub>2</sub> O) <sub>10</sub> ][CeC <sub>14</sub> H <sub>16</sub> O <sub>13</sub> ] <sub>3</sub> ·6H <sub>2</sub> O |

**Table S1o.** Summary of solid state structures containing a hydrated praseodymium(III) ion. The ICSD/CDS code refers to the code in the Inorganic Crystal Structure Database (ICSD, number) and Cambridge Structure Database (CSD, letters), respectively, and the mean Pr-O bond distance,  $d(\text{Pr-O})$ ;  $d(\text{Pr-O})_p$  denotes ligands forming the prism and  $d(\text{Pr-O})_c$  the capping ligands in tricapped trigonal prismatic configuration. Data in purple text are not included in the mean distance as they are uncertain or differ significantly from the mean value.

### Praseodymium(III)

#### Eight-coordination

| ICSD/CSD code | $d(\text{Pr-O})$ | Reference, compound formula                                                                                                                                                                                                                                                                               |
|---------------|------------------|-----------------------------------------------------------------------------------------------------------------------------------------------------------------------------------------------------------------------------------------------------------------------------------------------------------|
| IPICAN        | 2.476 Å          | Yang, B.; Gao, Z.-Z.; Lu, J.-H.; Zhu, Q.-J.; Xue, S.-F.; Tao, Z.; Prior, T. J.; Redshaw, C.; Wei, G.; Xiao, X. <i>CrystEngComm</i> <b>2016</b> , <i>18</i> , 5028. $[\text{Pr}(\text{H}_2\text{O})_9](\text{OH})_3 \cdot \text{C}_{44}\text{H}_{44}\text{N}_{24}\text{O}_{12} \cdot 23\text{H}_2\text{O}$ |

#### Nine-coordination

| ICSD/CSD code | $d(\text{Pr-O})_p + d(\text{Pr-O})_c$              | Reference, compound formula                                                                                                                                                 |
|---------------|----------------------------------------------------|-----------------------------------------------------------------------------------------------------------------------------------------------------------------------------|
| APRETS02      | 2.469 + 2.582 Å                                    | Gerkin, R. E.; Reppart, W. J. <i>Acta Crystallogr., Sect. C</i> <b>1984</b> , <i>40</i> , 781. $[\text{Pr}(\text{H}_2\text{O})_9](\text{C}_2\text{H}_5\text{SO}_4)_3$       |
| BUVWIY01      | 2.470 + 2.579 Å                                    | Chatterjee, A.; Maslen, E. N.; Watson, K. J. <i>Acta Crystallogr., Sect. B</i> <b>1988</b> , <i>44</i> , 381. $[\text{Pr}(\text{H}_2\text{O})_6](\text{CF}_3\text{SO}_3)_3$ |
| APRETS01      | 2.471 + 2.591 Å                                    | Albertsson, J.; Elding, I. <i>Acta Crystallogr., Sect. C</i> <b>1977</b> , <i>33</i> , 1460. $[\text{Pr}(\text{H}_2\text{O})_9](\text{C}_2\text{H}_5\text{SO}_4)_3$         |
| 28147         | 2.488 + 2.521 Å                                    | Albertsson, J.; Elding, I. <i>Acta Crystallogr., Sect. B</i> <b>1977</b> , <i>33</i> , 1460. $[\text{Pr}(\text{H}_2\text{O})_9](\text{BrO}_3)_3$                            |
| <b>Mean</b>   | <b>2.475 + 2.568 Å/4 structures, mean: 2.506 Å</b> |                                                                                                                                                                             |

#### Nine-coordination

| ICSD/CSD code | $d(\text{Pr-O})$ | Reference, compound formula                                                                                                                                                                                                                                                                                                                                          |
|---------------|------------------|----------------------------------------------------------------------------------------------------------------------------------------------------------------------------------------------------------------------------------------------------------------------------------------------------------------------------------------------------------------------|
| 415386        | 2.485 Å          | Müller, A.; Zhou Y.; Boegge, H.; Schmidtman, M.; Mitra, T.; Haupt, E. T. K.; Berkle, A. <i>Angew. Chem., Int. Ed.</i> <b>2006</b> , <i>45</i> , 460. $(\text{NH}_4)_{27}[\text{Pr}(\text{H}_2\text{O})_9]_{10}[\text{Pr}_5\text{MoMo}_5\text{O}_{21}(\text{H}_2\text{O})_6]_{12}(\text{Mo}_2\text{O}_4(\text{SO}_4))_{30}\text{Cl}_{12} \cdot 185\text{H}_2\text{O}$ |
| HAYRUX        | 2.492 Å          | Falk, F.; Herkert, L.; Hackbarth, L.; Muller-Buschbaum, K.; Finze, M.; Kockerling, M. <i>Z. Anorg. Allg. Chem.</i> <b>2017</b> , <i>643</i> , 625. $[\text{Pr}(\text{H}_2\text{O})_9](\text{B}(\text{CN})_4)_3 \cdot (\text{CH}_3)_2\text{CO}$                                                                                                                       |
| GANMUF        | 2.510 Å          | Antonenko, T. A.; Alikberova, L. Y.; Albov, D. V. <i>Acta Crystallogr., Sect. E</i> <b>2012</b> , <i>68</i> , m110. $[\text{Pr}(\text{H}_2\text{O})_6]\text{I}_3 \cdot 2(\text{SC}(\text{NH}_2)_2)$                                                                                                                                                                  |
| COKMIZ        | 2.515 Å          | Kostakis, G. E.; Abbas, G.; Anson, C. E.; Powell, A. K. <i>CrystEngComm</i> <b>2008</b> , <i>10</i> , 1117. $[\text{Pr}(\text{H}_2\text{O})_6](\text{C}_8\text{H}_5\text{N}_8)_3 \cdot 9\text{H}_2\text{O}$                                                                                                                                                          |
| 170692        | 2.527 Å          | Timofte, T.; Babai, A.; Meyer, G.; Mudring, A.V. <i>Acta Crystallogr., Sect. E</i> <b>2005</b> , <i>61</i> , i94. $[\text{Pr}(\text{H}_2\text{O})_9]\text{I}_3$                                                                                                                                                                                                      |

**Mean**            2.506 Å/5 structures  
**Mean all**       2.506 Å/9 structures

*Ten-coordination*

ICSD/CSD code *d*(Pr-O)

DOTPUX        2.371 Å

Reference, compound formula

Zhang, Y.-J.; Ma, B.-Q.; Gao, S.; Li, J.-R.; Liu, Q.-D.; Wen, G.-H.; Zhang, X.-X. *J. Chem. Soc., Dalton Trans.* **2000**, 2249. [Pr(H<sub>2</sub>O)<sub>10</sub>][PrCu<sub>6</sub>C<sub>66</sub>H<sub>48</sub>N<sub>6</sub>O<sub>36</sub>]·14H<sub>2</sub>O

**Table S1p.** Summary of solid state structures containing a hydrated neodymium(III) ion. The ICSD/CDS code refers to the code in the Inorganic Crystal Structure Database (ICSD, number) and Cambridge Structure Database (CSD, letters), respectively, and the mean Nd-O bond distance,  $d(\text{Nd-O})$ ;  $d(\text{Nd-O})_p$  denotes ligands forming the prism and  $d(\text{Nd-O})_c$  the capping ligands in tricapped trigonal prismatic configuration. Data in purple text are not included in the mean distance as they are uncertain or differ significantly from the mean value.

### Neodymium(III)

#### *Eight-coordination*

| ICSD/CSD code | $d(\text{Nd-O})$            | Reference, compound formula                                                                                                                                                                                                                                                                                                                |
|---------------|-----------------------------|--------------------------------------------------------------------------------------------------------------------------------------------------------------------------------------------------------------------------------------------------------------------------------------------------------------------------------------------|
| WUNQOS        | 2.338 Å                     | Wang, P.; Ma, J.-P.; Dong, Y.-B. <i>Chem. Eur. J.</i> <b>2009</b> , <i>15</i> , 10432. [(Nd(H <sub>2</sub> O) <sub>8</sub> ][Nd <sub>2</sub> C <sub>64</sub> H <sub>44</sub> N <sub>16</sub> O <sub>18</sub> ]ClO <sub>4</sub> ·H <sub>2</sub> O                                                                                           |
| YEGHIC        | 2.409 Å                     | Wang, Z.-X.; Shen, X.-F.; Wang, J.; Zhang, P.; Li, E. N. N.; Song, Y.; Ohkoshi, S.; Hashimoto, K.; You, X.-Z. <i>Angew. Chem., Int. Ed.</i> <b>2006</b> , <i>45</i> , 3287. [(Nd(H <sub>2</sub> O) <sub>8</sub> ][C <sub>36</sub> H <sub>48</sub> Mo <sub>3</sub> N <sub>24</sub> Nd <sub>3</sub> O <sub>12</sub> ]·8CH <sub>3</sub> OH    |
| IPICOB        | 2.438 Å                     | Yang, B.; Gao, Z.-Z.; Lu, J.-H.; Zhu, Q.-J.; Xue, S.-F.; Tao, Z.; Prior, T. J.; Redshaw, C.; Wei, G. X. <i>CrystEngComm</i> <b>2016</b> , <i>18</i> , 5028. [(Nd(H <sub>2</sub> O) <sub>8</sub> ](OH) <sub>3</sub> ·C <sub>40</sub> H <sub>44</sub> N <sub>24</sub> O <sub>12</sub> ·10H <sub>2</sub> O                                    |
| WUNSAA        | 2.450 Å                     | Wang, P.; Ma, J.-P.; Dong, Y.-B. <i>Chem. Eur. J.</i> <b>2009</b> , <i>15</i> , 10432. [(Nd(H <sub>2</sub> O) <sub>8</sub> ][Nd <sub>2</sub> C <sub>64</sub> H <sub>40</sub> N <sub>16</sub> O <sub>16</sub> ]ClO <sub>4</sub>                                                                                                             |
| MONRUE        | 2.457 Å                     | Tan, Y.-H.; Xiong, J.-B.; Huang, J.; Gao, J.-X.; Xu, Q.; Yu, Y.-M.; Wang, Y.; Yang, B.; Shu, Q.; Tang, Y.-Z. <i>Wuji Huaxue Xuebao</i> <b>2014</b> , <i>20</i> , 1621. [(Nd(H <sub>2</sub> O) <sub>8</sub> ](C <sub>6</sub> H <sub>4</sub> N <sub>5</sub> ) <sub>3</sub> ·2C <sub>6</sub> H <sub>5</sub> N <sub>5</sub> ·7H <sub>2</sub> O |
| <b>Mean</b>   | <b>2.439 Å/4 structures</b> |                                                                                                                                                                                                                                                                                                                                            |

#### *Nine-coordination, tricapped trigonal prism*

| ICSD/CSD code | $d(\text{Nd-O})_p + d(\text{Nd-O})_c$             | Reference, compound formula                                                                                                                                                                                                                                              |
|---------------|---------------------------------------------------|--------------------------------------------------------------------------------------------------------------------------------------------------------------------------------------------------------------------------------------------------------------------------|
| 26601         | 2.470 + 2.404 Å                                   | Helmholz, L. <i>J. Am. Chem. Soc.</i> <b>1939</b> , <i>61</i> , 1544-1550. [Nd(H <sub>2</sub> O) <sub>9</sub> ](BrO <sub>3</sub> ) <sub>3</sub>                                                                                                                          |
| 61780         | 2.451 + 2.568 Å                                   | Santos, C. O. P.; Castellano, E. E.; Machado, L. C.; Vicentini, G. <i>Inorg. Chim. Acta</i> <b>1985</b> , <i>110</i> , 83-86. [Nd(H <sub>2</sub> O) <sub>9</sub> ](CF <sub>3</sub> SO <sub>3</sub> ) <sub>3</sub>                                                        |
| 63668         | 2.451 + 2.569 Å                                   | Chatterjee, A.; Maslen, E. N.; Watson, K. J. <i>Acta Crystallogr., Sect. B</i> <b>1988</b> , <i>44</i> , 381. [Nd(H <sub>2</sub> O) <sub>9</sub> ](CF <sub>3</sub> SO <sub>3</sub> ) <sub>3</sub> .                                                                      |
| ZZZAQS01      | 2.458 + 2.570 Å                                   | Gerkin, R. E.; Reppart, W. J. <i>Acta Crystallogr., Sect. C</i> <b>1984</b> , <i>40</i> , 781. [Nd(H <sub>2</sub> O) <sub>9</sub> ](C <sub>2</sub> H <sub>5</sub> SO <sub>4</sub> ) <sub>3</sub>                                                                         |
| BUVWOE04      | 2.464 + 2.560 Å                                   | Lindqvist-Reis, P.; Apostolidis, C.; Rebizant, J.; Morgenstern, A.; Klenze, R.; Walter, O.; Fanghänel, T.; Haire, R. G. <i>Angew. Chem., Int. Ed.</i> <b>2007</b> , <i>46</i> , 919. [Nd(H <sub>2</sub> O) <sub>9</sub> ](CF <sub>3</sub> SO <sub>3</sub> ) <sub>3</sub> |
| BUVWOE05      | 2.464 + 2.558 Å                                   | Nelyubina, Y. V.; Puntus, L. N.; Lyssenko, K. A. <i>Chem. Eur. J.</i> <b>2014</b> , <i>20</i> , 2860. [Nd(H <sub>2</sub> O) <sub>9</sub> ](CF <sub>3</sub> SO <sub>3</sub> ) <sub>3</sub>                                                                                |
| <b>Mean</b>   | <b>2.458 + 2.565 Å/5 structures, mean 2.493 Å</b> |                                                                                                                                                                                                                                                                          |

Nine-coordination

| ICSD/CSD code | $d(\text{Nd-O})$             | Reference, compound formula                                                                                                                                                                                                                                                                                   |
|---------------|------------------------------|---------------------------------------------------------------------------------------------------------------------------------------------------------------------------------------------------------------------------------------------------------------------------------------------------------------|
| WEXCOT        | 2.486 Å                      | Alikberova, L. Y.; Albov, D. V.; Antonenko, T. A.; Kochetova, I. M.; Rukk, N. S. <i>Vestnik MITHT</i> <b>2010</b> , 5, 30. $[\text{Nd}(\text{H}_2\text{O})_9]\text{I}_3 \cdot 2\text{CH}_4\text{N}_2\text{S}$                                                                                                 |
| SEYYAX        | 2.491 Å                      | Hatano, M.; Takagi, E.; Arinobe, M.; Ishihara, K. <i>J. Organometal. Chem.</i> <b>2007</b> , 692, 569. $[\text{Nd}(\text{H}_2\text{O})_9]_2(\text{CF}_2(\text{CF}_2\text{SO}_3)_2)_3 \cdot 2\text{H}_2\text{O}$                                                                                               |
| SUDDIE        | 2.494 Å                      | Faithfull, D. L.; Harrowfield, J. M.; Ogden, M. I.; Skelton, B. W.; Third, K.; White, A. H. <i>Aust. J. Chem.</i> <b>1992</b> , 45, 583. $[\text{Nd}(\text{H}_2\text{O})_9](\text{C}_7\text{H}_7\text{SO}_3)_3 \cdot 4\text{H}_2\text{O}$                                                                     |
| VESYOU        | 2.500 Å                      | Semenova, L. I.; Skelton, B. W.; White, A. H. <i>Z. Anorg. Allg. Chem.</i> <b>2006</b> , 632, 2405. $((\text{CH}_3)_4)_2[\text{Nd}(\text{H}_2\text{O})_9]\text{Cl}_5 \cdot 3\text{H}_2\text{O}$                                                                                                               |
| GAXFOE        | 2.502 Å                      | Guo, Q.; Fang, T.; Liu, Q.; Zhu, L.; Yang, S.; Tian, G. <i>Dalton Trans</i> , 2022, 51, 7416. $[\text{Nd}(\text{H}_2\text{O})_9](\text{PS}_2(\text{CH}_2(\text{CH}(\text{CH}_3)_2)_3$                                                                                                                         |
| XOLHEO        | 2.502 Å                      | Sieron, L.; Czylkowska, A.; Raducka, A. <i>Zh. Strukt. Khim.</i> <b>2019</b> , 60, 124. $[\text{Nd}(\text{H}_2\text{O})_9](\text{C}_{10}\text{H}_9\text{N}_2)\text{Cl}_4 \cdot (\text{C}_{10}\text{H}_8\text{N}_2) \cdot \text{H}_2\text{O}$                                                                  |
| YAMYIV        | 2.504 Å                      | Trzesowska, A.; Kruszynski, R.; Bartczak, T. J.; Zalewicz, M. <i>Acta Crystallogr., Sect. E</i> <b>2005</b> , 61, m625. $[\text{Nd}(\text{H}_2\text{O})_9]\text{Cl}_3 \cdot 2(\text{C}_6\text{H}_{12}\text{N}_4) \cdot 4\text{H}_2\text{O}$                                                                   |
| JEDLOU        | 2.508 Å                      | Dalgarno, S. J.; Atwood, J. L.; Raston, C. L. <i>Cryst. Growth Des.</i> <b>2006</b> , 6, 174. $(\text{H}_3\text{O})_2[\text{Nd}(\text{H}_2\text{O})_9](\text{C}_8\text{H}_{20}\text{N}_2\text{O}_2)_4(\text{C}_{28}\text{H}_{20}\text{O}_{16}\text{S}_4)_4 \cdot 31\text{H}_2\text{O}$                        |
| NABZEW        | 2.509 Å                      | Dalgarno, S. J.; Hardie, M. J.; Raston, C. L. <i>Cryst. Growth Des.</i> <b>2004</b> , 4, 174. $[\text{Nd}(\text{H}_2\text{O})_9]_2(\text{C}_{12}\text{H}_{26}\text{NO}_5)(\text{C}_{28}\text{H}_{20}\text{O}_{16}\text{S}_4)(\text{C}_{28}\text{H}_{21}\text{O}_{16}\text{S}_4) \cdot 29.5\text{H}_2\text{O}$ |
| 170054        | 2.512 Å                      | Timofte, T; Babai, A.; Meyer, G.; Mudring, A.-V. <i>Acta Crystallogr., Sect. E</i> <b>2005</b> , 61, i88-i89. $[\text{Nd}(\text{H}_2\text{O})_9]\text{I}_3$                                                                                                                                                   |
| LAGGUW        | 2.513 Å                      | Zhang, Q.; Lu, C.; Yang, W.; Chen, S.; Yu, Y.; He, X.; Yan, Y.; Liu, J.; Xu, X.; Xia, C.; Chen, L.; Wu, X. <i>Polyhedron</i> <b>2004</b> , 23, 1975.                                                                                                                                                          |
| GOHTAY        | 2.514 Å                      | Rogers, R. D. <i>Inorg. Chim. Acta</i> <b>1988</b> , 149, 307. $[\text{Nd}(\text{H}_2\text{O})_9]\text{Cl}_3 \cdot \text{C}_{10}\text{H}_{20}\text{O}_5 \cdot \text{H}_2\text{O}$                                                                                                                             |
| LUTHAJ        | 2.514 Å                      | Dalgarno, S. J.; Raston, C. L. <i>Dalton Trans.</i> <b>2003</b> , 287. $[\text{Nd}(\text{H}_2\text{O})_9]_2(\text{C}_{12}\text{H}_{28}\text{N}_2\text{O}_4)(\text{C}_{28}\text{H}_{20}\text{O}_{16}\text{S}_4)_2 \cdot 19\text{H}_2\text{O}$                                                                  |
| 23018         | 2.519 Å                      | Saf'yanov, Yu. N.; Belov, N. V. <i>Dokl. Akad. Nauk SSSR</i> <b>1976</b> , 227, 1112. $[\text{Nd}(\text{H}_2\text{O})_9]_2[\text{V}_{10}\text{O}_{28}] \cdot 10\text{H}_2\text{O}$                                                                                                                            |
| <b>Mean</b>   | <b>2.505 Å/14 structures</b> |                                                                                                                                                                                                                                                                                                               |
|               | <b>2.501 Å/19 structures</b> |                                                                                                                                                                                                                                                                                                               |

**Table S1q.** Summary of solid state structures containing a hydrated samarium(III) ion. The ICSD/CDS code refers to the code in the Inorganic Crystal Structure Database (ICSD, number) and Cambridge Structure Database (CSD, letters), respectively, and the mean Sm-O bond distance,  $d(\text{Sm-O})$ ;  $d(\text{Sm-O})_p$  denotes ligands forming the prism and  $d(\text{Sm-O})_c$  the capping ligands in tricapped trigonal prismatic configuration. Data in purple text are not included in the mean distance as they are uncertain or differ significantly from the mean value.

### Samarium(III)

#### *Eight-coordination*

| ICSD/CSD code | $d(\text{Sm-O})$            | Reference, compound formula                                                                                                                                                                                                                                                                               |
|---------------|-----------------------------|-----------------------------------------------------------------------------------------------------------------------------------------------------------------------------------------------------------------------------------------------------------------------------------------------------------|
| IPIDES        | 2.416 Å                     | Yang, B.; Gao, Z.-Z.; Lu, J.-H.; Zhu, Q.-J.; Xue, S.-F.; Tao, Z.; Prior, T. J.; Redshaw, C.; Wei, G. Xiao, X. <i>CrystEngComm</i> <b>2016</b> , <i>18</i> , 5028. $[(\text{Eu}(\text{H}_2\text{O})_8)(\text{OH})_3 \cdot \text{C}_{40}\text{H}_{44}\text{N}_{24}\text{O}_{12} \cdot 9\text{H}_2\text{O}]$ |
| JOQVIX        | 2.421 Å                     | Lin, R.-L.; Zhou, J.-J.; Zhou, F. H.; Sun, W.-Q.; Liu, J.-X.; Chen, K. <i>CrystEngComm</i> <b>2019</b> , <i>21</i> , 5641. $[(\text{Sm}(\text{H}_2\text{O})_8)[\text{CdCl}_4]\text{NO}_3 \cdot \text{C}_{44}\text{H}_{52}\text{N}_{24}\text{O}_{12} \cdot 3\text{H}_2\text{O}]$                           |
| XIDZOA        | 2.430 Å                     | Dong, Y.-B.; Wang, P.; Ma, J.-P.; Zhao, X.-X.; Wang, H.-Y.; Tang, B.; Huang, R.-Q. <i>J. Am. Chem. Soc.</i> <b>2007</b> , <i>129</i> , 4872. $[\text{Sm}(\text{H}_2\text{O})_8][\text{Sm}_2\text{C}_{64}\text{H}_{44}\text{N}_{16}\text{O}_{18}]\text{Cl} \cdot 2\text{H}_2\text{O}$                      |
| AZAOT         | 2.451 Å                     | Wang, J.; Zhao, J.; Niu, J. <i>J. Mol. Struct.</i> <b>2004</b> , <i>697</i> , 191. $(\text{H}_3\text{O})_3[\text{Sm}(\text{H}_2\text{O})_8][\text{SmW}_{18}\text{C}_{18}\text{H}_{44}\text{N}_6\text{O}_{69}\text{P}_2] \cdot 2(\text{CH}_3)_2\text{NCO} \cdot 3\text{H}_2\text{O}$                       |
| <b>Mean</b>   | <b>2.430 Å/4 structures</b> |                                                                                                                                                                                                                                                                                                           |

#### *Nine-coordination*

| ICSD/CSD code | $d(\text{Sm-O})_p + d(\text{Sm-O})_c$             | Reference, compound formula                                                                                                                                                                                               |
|---------------|---------------------------------------------------|---------------------------------------------------------------------------------------------------------------------------------------------------------------------------------------------------------------------------|
| BUVWUK01      | 2.422 + 2.549 Å                                   | Chatterjee, A.; Maslen, E. N.; Watson, K. J. <i>Acta Crystallogr., Sect. B</i> <b>1988</b> , <i>44</i> , 381. $[\text{Sm}(\text{H}_2\text{O})_9](\text{CF}_3\text{SO}_3)_3$                                               |
| BUVWUK02      | 2.428 + 2.530 Å                                   | Chan, E. J.; Harrowfield, J. M.; Robinson, W. T.; Skelton, B. W.; Sobolev, A. N.; White, A. H. <i>Z. Anorg. All. Chem.</i> <b>2009</b> , <i>4635</i> , 456. $[\text{Sm}(\text{H}_2\text{O})_9](\text{CF}_3\text{SO}_3)_3$ |
| ZZZAQV01      | 2.430 + 2.550 Å                                   | Gerkin, R. E.; Reppart, W. J. <i>Acta Crystallogr., Sect. C</i> <b>1984</b> , <i>40</i> , 781. $[\text{Sm}(\text{H}_2\text{O})_9](\text{C}_2\text{H}_5\text{SO}_4)_3$                                                     |
| 23757         | 2.462 + 2.550 Å                                   | Sikka, S. K. <i>Acta Crystallogr. Sect. A</i> <b>1969</b> , <i>25</i> , 621. $[\text{Sm}(\text{H}_2\text{O})_9](\text{BrO}_3)_3$                                                                                          |
| <b>Mean</b>   | <b>2.436 + 2.545 Å/4 structures; mean 2.472 Å</b> |                                                                                                                                                                                                                           |

#### *Nine-coordination*

| ICSD/CSD code | $d(\text{Sm-O})$ | Reference, compound formula |
|---------------|------------------|-----------------------------|
|---------------|------------------|-----------------------------|



|                 |                              |                                                                                                                                                                                                                                                                                                                                                                        |
|-----------------|------------------------------|------------------------------------------------------------------------------------------------------------------------------------------------------------------------------------------------------------------------------------------------------------------------------------------------------------------------------------------------------------------------|
| NUHRIS          | 2.452 Å                      | Ma, S.-M.; Ren, S.; Ma, Y.; Liao, D.-Z. <i>J. Chem. Sci. Bangladore</i> <b>2009</b> , <i>121</i> , 421. [Sm(H <sub>2</sub> O) <sub>9</sub> ][Mo <sub>2</sub> Sm <sub>2</sub> C <sub>36</sub> H <sub>22</sub> N <sub>20</sub> O <sub>4</sub> ]                                                                                                                          |
| SEYYEB          | 2.452 Å                      | Hatano, M.; Takagi, E.; Arinobe, M.; Ishihara, K. <i>J. Organometal. Chem.</i> <b>2007</b> , <i>692</i> , 569. [Sm(H <sub>2</sub> O) <sub>9</sub> ] <sub>2</sub> (CF <sub>2</sub> (CF <sub>2</sub> SO <sub>3</sub> ) <sub>2</sub> ) <sub>3</sub> ·2H <sub>2</sub> O                                                                                                    |
| YUBQUJ          | 2.459 Å                      | Mahmudov, K. T.; Fatima M.; Guedes da Silva, C.; Sutradhar, M.; Kopylovich, M. N.; Huseynov, F. E.; Shamilov, N. T.; Voronina, A. A.; Buslaeva, T. M.; Pombeiro, A. J. L. <i>Dalton Trans.</i> <b>2015</b> , <i>44</i> , 5602. [Sm(H <sub>2</sub> O) <sub>9</sub> ](C <sub>16</sub> H <sub>12</sub> ClN <sub>2</sub> O <sub>6</sub> S) <sub>3</sub> ·2H <sub>2</sub> O |
| CEJFUT          | 2.460 Å                      | Barnes, J. C. CCDC deposition number 606878, <b>2006</b> . [Sm(H <sub>2</sub> O) <sub>9</sub> ](ClO <sub>4</sub> ) <sub>3</sub> ·3C <sub>4</sub> H <sub>8</sub> O <sub>2</sub> ·2H <sub>2</sub> O                                                                                                                                                                      |
| 91456           | 2.461 Å                      | Lim, K. C.; Skelton, B. W.; White, A. H. <i>Aust. J. Chem.</i> <b>2000</b> , <i>53</i> , 867. [Sm(H <sub>2</sub> O) <sub>9</sub> ]I <sub>3</sub>                                                                                                                                                                                                                       |
| DEYYIP          | 2.471 Å                      | Barnes, J. C.; Nicoll, G. Y. R. <i>Inorg. Chim. Acta</i> <b>1985</b> , <i>110</i> , 47. [Sm(H <sub>2</sub> O) <sub>9</sub> ]Br <sub>3</sub> ·2C <sub>4</sub> H <sub>8</sub> O <sub>2</sub> .                                                                                                                                                                           |
| COTNEF          | 2.474 Å                      | Zhang, Q.-Z. . CCDC deposition number 236219, <b>2009</b> . NH <sub>4</sub> [Sm(H <sub>2</sub> O) <sub>9</sub> ][O(VC <sub>6</sub> H <sub>6</sub> NO <sub>7</sub> ) <sub>2</sub> ]                                                                                                                                                                                     |
| <b>Mean</b>     | <b>2.461 Å/7 structures</b>  |                                                                                                                                                                                                                                                                                                                                                                        |
| <b>Mean all</b> | <b>2.465 Å/11 structures</b> |                                                                                                                                                                                                                                                                                                                                                                        |

**Table S1r.** Summary of solid state structures containing a hydrated europium(III) ion. The ICSD/CDS code refers to the code in the Inorganic Crystal Structure Database (ICSD, number) and Cambridge Structure Database (CSD, letters), respectively, and the mean Eu-O bond distance,  $d(\text{Eu-O})$ ;  $d(\text{Eu-O})_p$  denotes ligands forming the prism and  $d(\text{Eu-O})_c$  the capping ligands in tricapped trigonal prismatic configuration. Data in purple text are not included in the mean distance as they are uncertain or differ significantly from the mean value.

### Europium(III)

#### Eight-coordination

| ICSD/CSD code | $d(\text{Eu-O})$            | Reference, compound formula                                                                                                                                                                                                                                                                                                               |
|---------------|-----------------------------|-------------------------------------------------------------------------------------------------------------------------------------------------------------------------------------------------------------------------------------------------------------------------------------------------------------------------------------------|
| NICQUY        | 2.391 Å                     | Bi, Y.; Liao, W.; Zhang, H.; Li, D. <i>CrystEngComm</i> <b>2009</b> , <i>11</i> , 1213.<br>((CH <sub>3</sub> ) <sub>4</sub> N)[Eu(H <sub>2</sub> O) <sub>8</sub> ](C <sub>28</sub> H <sub>20</sub> O <sub>16</sub> S <sub>4</sub> )·16H <sub>2</sub> O                                                                                    |
| HIDFEH        | 2.405 Å                     | Yamada, M.; Hamada, F. <i>CrystEngComm</i> <b>2013</b> , <i>15</i> , 5703. [Eu(H <sub>2</sub> O) <sub>8</sub> ] <sub>2</sub> (C <sub>36</sub> H <sub>18</sub> O <sub>24</sub> )S <sub>12</sub> ·16H <sub>2</sub> O                                                                                                                        |
| IPIDIW        | 2.407 Å                     | Yang, B.; Gao, Z.-Z.; Lu, J.-H.; Zhu, Q.-J.; Xue, S.-F.; Tao, Z.; Prior, T. J.; Redshaw, C.; Wei, G.; Xiao, X. <i>CrystEngComm</i> <b>2016</b> , <i>18</i> , 5028. [Eu(H <sub>2</sub> O) <sub>8</sub> ](OH) <sub>3</sub> ·C <sub>44</sub> H <sub>44</sub> N <sub>24</sub> O <sub>12</sub> ·13H <sub>2</sub> O                             |
| MONNAG        | 2.412 Å                     | Tan, Y.-H.; Xiong, J.-B.; Huang, J.; Gao, J.-X.; Xu, Q.; Yu, Y.-M.; Wang, Y.; Yang, B.; Shu, Q.; Tang, Y.-Z. <i>Wuji Huaxue Xuebao</i> <b>2014</b> , <i>30</i> , 1621. [Eu(H <sub>2</sub> O) <sub>8</sub> ](C <sub>6</sub> H <sub>4</sub> N <sub>5</sub> ) <sub>3</sub> ·2C <sub>6</sub> H <sub>5</sub> N <sub>5</sub> ·7H <sub>2</sub> O |
| XIFBAQ        | 2.412 Å                     | Dong, Y.-B.; Wang, P.; Ma, J.-P.; Zhao, X.-X.; Wang, H.-Y.; Tang, B.; Huang, R.-Q. <i>J. Am. Chem. Soc.</i> <b>2007</b> , <i>129</i> , 4872. [Eu(H <sub>2</sub> O) <sub>8</sub> ][Eu <sub>2</sub> C <sub>64</sub> H <sub>44</sub> N <sub>16</sub> O <sub>18</sub> ]Cl·2H <sub>2</sub> O                                                   |
| VEHLUS        | 2.413 Å                     | Shen, F.-F.; Chen, K.; Hua, Z.-Y.; Wang, Y.; Xu, J.; Chen, M.-D.; Zhang, Y.-Q.; Tao, Z. <i>CrystEngComm</i> <b>2017</b> , <i>19</i> , 5635. [Eu(H <sub>2</sub> O) <sub>8</sub> ]Cl <sub>3</sub> ·(C <sub>44</sub> H <sub>52</sub> N <sub>24</sub> O <sub>14</sub> )·18H <sub>2</sub> O                                                    |
| 132044        | 2.418 Å                     | Kang, R.-K.; Cao, J.-P.; Han, Y. M.; Hong, Y.-L.; Yang, M.-X.; Xu, Y. <i>Z. Anorg. Allg. Chem.</i> <b>2020</b> , <i>646</i> , 1315. [Eu(H <sub>2</sub> O) <sub>8</sub> ] <sub>2</sub> [V <sub>10</sub> O <sub>28</sub> ]·9H <sub>2</sub> O                                                                                                |
| 87728         | 2.444 Å                     | Naruke, H.; Yamase, T.; Kaneko, M. <i>Bull. Chem. Soc. Jpn.</i> <b>1999</b> , <i>72</i> , 1775. [Eu(H <sub>2</sub> O) <sub>8</sub> ] <sub>2</sub> [V <sub>10</sub> O <sub>28</sub> ]·8H <sub>2</sub> O                                                                                                                                    |
| BAPGAB        | 2.445 Å                     | Ahmad, R.; Dix, I.; Hardie, M. J. <i>Inorg. Chem.</i> <b>2003</b> , <i>42</i> , 2182.<br>[Eu(H <sub>2</sub> O) <sub>8</sub> ] <sub>3</sub> [Co(C <sub>2</sub> B <sub>9</sub> H <sub>11</sub> ) <sub>2</sub> ] <sub>9</sub> ·12(C <sub>27</sub> H <sub>30</sub> O <sub>6</sub> )·11CH <sub>3</sub> CN·15H <sub>2</sub> O                   |
| <b>Mean</b>   | <b>2.416 Å/9 structures</b> |                                                                                                                                                                                                                                                                                                                                           |

#### Nine-coordination

| ICSD/CSD code | $d(\text{Eu-O})_p + d(\text{Eu-O})_c$ | Reference, compound formula                                                                                                                                                                          |
|---------------|---------------------------------------|------------------------------------------------------------------------------------------------------------------------------------------------------------------------------------------------------|
| BUVXAR01      | 2.408 + 2.536 Å                       | Chatterjee, A., <i>Pak. J. Sci. Ind. Res.</i> <b>1986</b> , <i>29</i> , 381. [Eu(H <sub>2</sub> O) <sub>9</sub> ](CF <sub>3</sub> SO <sub>3</sub> ) <sub>3</sub>                                     |
| BUVXAR11      | 2.412 + 2.536 Å                       | Chatterjee, A.; Maslen, E. N.; Watson, K. J. <i>Acta Crystallogr., Sect. B</i> <b>1988</b> , <i>44</i> , 381.<br>[Eu(H <sub>2</sub> O) <sub>9</sub> ](CF <sub>3</sub> SO <sub>3</sub> ) <sub>3</sub> |
| ZZZAQ01       | 2.416 + 2.542 Å                       | Gerkin, R. E.; Reppart, W. J. <i>Acta Crystallogr., Sect. C</i> <b>1984</b> , <i>40</i> , 781. [Eu(H <sub>2</sub> O) <sub>9</sub> ](C <sub>2</sub> H <sub>5</sub> OSO <sub>3</sub> ) <sub>3</sub>    |

|             |                                                   |                                                                                                                                                                                                                                                                                                     |
|-------------|---------------------------------------------------|-----------------------------------------------------------------------------------------------------------------------------------------------------------------------------------------------------------------------------------------------------------------------------------------------------|
| BUVXAR12    | 2.421 + 2.527 Å                                   | Nelyubina, Y. V. Puntus, L. N.; Lyssenko, K. A. <i>Chem. Eur. J.</i> <b>2014</b> , <i>20</i> , 2860. [Eu(H <sub>2</sub> O) <sub>6</sub> ](CF <sub>3</sub> SO <sub>3</sub> ) <sub>3</sub>                                                                                                            |
| GIBVAP      | 2.550 + 2.640 Å                                   | Wang, F.-Q.; Zheng, X.-J.; Wan, Y.-H.; Sun, C.-Y.; Wang, Z.-M.; Wang, K.-Z.; Jin, L.-P. <i>Inorg. Chem.</i> <b>2007</b> , <i>46</i> , 2956. (H(H <sub>2</sub> O) <sub>6</sub> )[Eu(H <sub>2</sub> O) <sub>9</sub> ] <sub>2</sub> [CuEuC <sub>18</sub> N <sub>6</sub> O <sub>12</sub> ] <sub>2</sub> |
| <b>Mean</b> | <b>2.414 + 2.535 Å/4 structures; mean 2.455 Å</b> |                                                                                                                                                                                                                                                                                                     |

#### Nine-coordination

| ICSD/CSD code | <i>d</i> (Er-O) | Reference, compound formula                                                                                                                                                                                                                                                                                                                                                    |
|---------------|-----------------|--------------------------------------------------------------------------------------------------------------------------------------------------------------------------------------------------------------------------------------------------------------------------------------------------------------------------------------------------------------------------------|
| ZILVUL        | 2.432 Å         | Steed, J. W.; Johnson, C. P.; Barnes, C. L.; Juneja, R. K.; Atwood, J. L.; Reilly, S.; Hollis, R. L.; Smith, P. H.; Clark, D. L. <i>J. Am. Chem. Soc.</i> <b>1995</b> , <i>117</i> , 11426.<br>Na[Eu(H <sub>2</sub> O) <sub>9</sub> ] <sub>2</sub> [EuC <sub>75</sub> H <sub>65</sub> NO <sub>46</sub> S <sub>10</sub> ]·C <sub>5</sub> H <sub>5</sub> NO·17.5H <sub>2</sub> O |
| GEKZUT        | 2.457 Å         | Antonenko, T. A.; Alikberova, L. Y.; Albov, D. V.; Rukk, N, S. <i>Koord. Khim.</i> <b>2011</b> , <i>37</i> , 786.<br>[Eu(H <sub>2</sub> O) <sub>6</sub> ] <sub>3</sub> ·2(SC(NH <sub>2</sub> ) <sub>2</sub> )                                                                                                                                                                  |
| DAXCEM        | 2.459 Å         | Hou, Y.; Rodriguez, M. A.; Nyman, M. <i>Cryst. Growth Des.</i> <b>2012</b> , <i>12</i> , 1422.<br>[Eu(H <sub>2</sub> O) <sub>9</sub> ] <sub>2</sub> [Fe <sub>4</sub> C <sub>26</sub> H <sub>34</sub> N <sub>4</sub> O <sub>24</sub> ] <sub>2</sub> [Eu <sub>2</sub> Fe <sub>8</sub> C <sub>52</sub> H <sub>88</sub> N <sub>8</sub> O <sub>60</sub> ]·12H <sub>2</sub> O        |
| IBIBAX        | 2.460 Å         | Dalgarno, S. J.; Hardie, M. J.; Warren, J. E.; Raston, C. L. <i>Dalton Trans.</i> <b>2004</b> , 2413.<br>[Eu(H <sub>2</sub> O) <sub>9</sub> ](C <sub>12</sub> H <sub>28</sub> N <sub>2</sub> O <sub>2</sub> )(C <sub>35</sub> H <sub>25</sub> O <sub>20</sub> S <sub>5</sub> )·13H <sub>2</sub> O                                                                              |
| 172983        | 2.461 Å         | Ehrenberg, H.; Fuess, H.; Hesse, S.; Zimmermann, J.; von Seggern, H.; Knapp, M. <i>Acta Crystallogr., Sect. B</i> <b>2007</b> , <i>63</i> , 201. Cs <sub>2</sub> [Eu(H <sub>2</sub> O) <sub>8</sub> ] <sub>2</sub> Br <sub>5</sub> ·H <sub>2</sub> O                                                                                                                           |
| CUMDUK        | 2.464 Å         | Dang, Z.-H.; Mou, S.; Xu, L. <i>J. Solid State Chem.</i> <b>2009</b> , 182, 2840.<br>[Eu(H <sub>2</sub> O) <sub>9</sub> ][Mo <sub>4</sub> NaC <sub>24</sub> H <sub>28</sub> N <sub>4</sub> O <sub>3</sub> S <sub>2</sub> ]·3H <sub>2</sub> O                                                                                                                                   |
| JEDLUA        | 2.465 Å         | Dalgarno, S. J.; Atwood, J. L.; Raston, C. L. <i>Cryst. Growth Des.</i> <b>2006</b> , <i>6</i> , 174.<br>[Eu(H <sub>2</sub> O) <sub>9</sub> ](C <sub>10</sub> H <sub>24</sub> N <sub>2</sub> O <sub>3</sub> )(C <sub>35</sub> H <sub>25</sub> O <sub>20</sub> S <sub>5</sub> )·11.75H <sub>2</sub> O                                                                           |
| FEKGUY        | 2.466 Å         | Zhang, Q.-Z.; Chen, S.-M.; Yu, Y.-Q.; He, X.; Yan, Y.; Liu, J.-H.; Xu, X.-J.; Xia, C.-K.; Chen, L.-J.; Wu, X.-Y.; Lu, C.-Z. <i>Wuji Huaxue Xuebao</i> <b>2005</b> , <i>21</i> , 101. NH <sub>4</sub> [Eu(H <sub>2</sub> O) <sub>9</sub> ][O(VC <sub>6</sub> H <sub>6</sub> NO <sub>7</sub> ) <sub>2</sub> ]                                                                    |
| NOMWES        | 2.475 Å         | Dalgarno, S.; Warren, J. E.; Atwood, J. L.; Raston, C. L. <i>New. J. Chem.</i> <b>2008</b> , <i>32</i> , 2100.<br>[Eu(H <sub>2</sub> O) <sub>9</sub> ] <sub>2</sub> [NaC <sub>70</sub> H <sub>59</sub> O <sub>43</sub> S <sub>10</sub> ]·2(4-CH <sub>3</sub> C <sub>5</sub> H <sub>4</sub> NO)·16.5H <sub>2</sub> O                                                            |
| 59282         | 2.478 Å         | Sugeta, M.; Yamase, T. <i>Acta Crystallogr., Sect. C</i> <b>1997</b> , <i>53</i> , 1166.<br>H <sub>3</sub> K <sub>2</sub> [Eu(H <sub>2</sub> O) <sub>8</sub> ] <sub>3</sub> O <sub>3</sub> [(GeTi <sub>3</sub> W <sub>9</sub> O <sub>37</sub> ) <sub>2</sub> ]·13H <sub>2</sub> O                                                                                              |
| NOMWIW        | 2.478 Å         | Dalgarno, S.; Warren, J. E.; Atwood, J. L.; Raston, C. L. <i>New. J. Chem.</i> <b>2008</b> , <i>32</i> , 2100.<br>[Eu(H <sub>2</sub> O) <sub>9</sub> ] <sub>2</sub> (C <sub>35</sub> H <sub>27</sub> O <sub>20</sub> S <sub>5</sub> ) <sub>2</sub> ·2(4-ONC <sub>5</sub> H <sub>4</sub> -C <sub>5</sub> H <sub>4</sub> NO)·17H <sub>2</sub> O                                  |
| TAHDIQ        | 2.482 Å         | Dalgarno, S. J. Hardie, M. J.; Makha, M.; Raston, C. L. <i>Chem. Eur. J.</i> <b>2003</b> , <i>9</i> , 2834.<br>[Eu(H <sub>2</sub> O) <sub>9</sub> ] <sub>2</sub> (C <sub>42</sub> H <sub>30</sub> O <sub>24</sub> S <sub>6</sub> )·2(C <sub>12</sub> H <sub>24</sub> O <sub>6</sub> )·24H <sub>2</sub> O                                                                       |

JIMGES 2.483 Å Roques, N.; Perruchas, S.; Maspoeh, D.; Datcu, A.; Wurst, K.; Sutter, J.-P.; Rovira, C.; Veciana, J. *Inorg. Chim. Acta* **2006**, 360, 3861.  
[Eu(H<sub>2</sub>O)<sub>9</sub>](CH(C<sub>6</sub>Cl<sub>5</sub>)<sub>2</sub>(C<sub>6</sub>Cl<sub>4</sub>COO))<sub>3</sub>·3(CH(C<sub>6</sub>Cl<sub>5</sub>)<sub>2</sub>(C<sub>6</sub>Cl<sub>4</sub>COOH))·6C<sub>2</sub>H<sub>5</sub>OH·13H<sub>2</sub>O

**Mean** 2.466 Å/13 structures  
**Mean all** 2.463 Å/17 structures

**Table S1s.** Summary of solid state structures containing a hydrated gadolinium(III) ion. The ICSD/CDS code refers to the code in the Inorganic Crystal Structure Database (ICSD, number) and Cambridge Structure Database (CSD, letters), respectively, and the mean Dy-O bond distance,  $d(\text{Gd-O})$ ;  $d(\text{Gd-O})_p$  denotes ligands forming the prism and  $d(\text{Gd-O})_c$  the capping ligands in tricapped trigonal prismatic configuration. Data in purple text are not included in the mean distance as they are uncertain or differ significantly from the mean value.

## Gadolinium(III)

### Seven-coordination

| ICSD/CSD code | $d(\text{Gd-O})$ | Reference, compound formula                                                                                                                                                                                                                                                                                     |
|---------------|------------------|-----------------------------------------------------------------------------------------------------------------------------------------------------------------------------------------------------------------------------------------------------------------------------------------------------------------|
| TUKHUF        | 2.409 Å          | Ling, I.; Sobolev, A. N. <i>Mater. Today: Proc.</i> <b>2018</b> , <i>5</i> , 166.<br>[Gd(H <sub>2</sub> O) <sub>7</sub> ](C <sub>25</sub> H <sub>22</sub> OP) <sub>4</sub> (C <sub>9</sub> H <sub>20</sub> N)(C <sub>28</sub> H <sub>20</sub> O <sub>16</sub> S <sub>4</sub> ) <sub>2</sub> ·25H <sub>2</sub> O |

### Eight-coordination

| ICSD/CSD code | $d(\text{Gd-O})$                      | Reference, compound formula                                                                                                                                                                                                                                                                                                                                                                                                              |
|---------------|---------------------------------------|------------------------------------------------------------------------------------------------------------------------------------------------------------------------------------------------------------------------------------------------------------------------------------------------------------------------------------------------------------------------------------------------------------------------------------------|
| RUZNUX        | 2.362 Å                               | Ling, I.; Sobolev, A. N.; Raston, C. L. <i>CrystEngComm</i> <b>2016</b> , <i>18</i> , 4929.<br>[Gd(H <sub>2</sub> O) <sub>8</sub> ](C <sub>25</sub> H <sub>22</sub> OP) <sub>2</sub> (C <sub>8</sub> H <sub>15</sub> N <sub>2</sub> )[GdC <sub>56</sub> H <sub>47</sub> O <sub>36</sub> S <sub>8</sub> ]·H <sub>2</sub> O                                                                                                                |
| MEBTUM        | 2.383 Å                               | Ling, I.; Campbell, C. L.; Sobolev, A. N.; Dalgarno, S. J. <i>CrystEngComm</i> <b>2022</b> , <i>24</i> , 4201.<br>[Gd(H <sub>2</sub> O) <sub>8</sub> ](C <sub>8</sub> H <sub>15</sub> N <sub>2</sub> ) <sub>2</sub> [GdC <sub>56</sub> H <sub>51</sub> O <sub>36</sub> S <sub>8</sub> ]·18H <sub>2</sub> O                                                                                                                               |
| FIBJIL        | 2.386 Å                               | Ling, I.; Sobolwv, A. N.; Alias, Y.; Raston, C. L. <i>CrystEngComm</i> <b>2013</b> , <i>15</i> , 2888.<br>[Gd(H <sub>2</sub> O) <sub>8</sub> ][(C <sub>6</sub> H <sub>5</sub> ) <sub>4</sub> P](C <sub>14</sub> H <sub>27</sub> N <sub>2</sub> )(C <sub>28</sub> H <sub>19</sub> O <sub>16</sub> S <sub>4</sub> )·12H <sub>2</sub> O                                                                                                     |
| MEBVAU        | 2.389 Å                               | Ling, I.; Campbell, C. L.; Sobolev, A. N.; Dalgarno, S. J. <i>CrystEngComm</i> <b>2022</b> , <i>24</i> , 4201.<br>[Gd(H <sub>2</sub> O) <sub>8</sub> ] <sub>2</sub> (C <sub>16</sub> H <sub>20</sub> N <sub>4</sub> )(C <sub>28</sub> H <sub>20</sub> O <sub>16</sub> S <sub>4</sub> ) <sub>2</sub> ·27H <sub>2</sub> O                                                                                                                  |
| BUZWAV        | 2.391 Å                               | Yamada, M.; Kondo, Y.; Hamada, F. <i>Int. J. Soc. Mater. Eng. Resour.</i> <b>2008</b> , <i>15</i> , 50.<br>[Gd(H <sub>2</sub> O) <sub>8</sub> ] <sub>2</sub> (C <sub>36</sub> H <sub>18</sub> O <sub>24</sub> S <sub>12</sub> )·16H <sub>2</sub> O                                                                                                                                                                                       |
| RACNOA        | 2.391 Å                               | Ling, I.; Alias, Y.; Sobolev, A. N.; Raston, C. L. <i>New J Chem.</i> <b>2010</b> , <i>34</i> , 414.<br>[Gd(H <sub>2</sub> O) <sub>9</sub> ][Gd(H <sub>2</sub> O) <sub>8</sub> ](C <sub>25</sub> H <sub>22</sub> OP) <sub>2</sub> (C <sub>13</sub> H <sub>25</sub> N <sub>2</sub> )(C <sub>28</sub> H <sub>19</sub> O <sub>16</sub> S <sub>4</sub> )(C <sub>28</sub> H <sub>20</sub> O <sub>16</sub> S <sub>4</sub> )·14H <sub>2</sub> O |
| DAXNAT        | 2.392 Å                               | Ling, I.; Alias, Y.; Skelton, B. W.; Raston, C. L. <i>Cryst. Growth Des.</i> <b>2012</b> , <i>12</i> , 1564.<br>[Gd(H <sub>2</sub> O) <sub>8</sub> ](C <sub>44</sub> H <sub>38</sub> P <sub>2</sub> )(C <sub>35</sub> H <sub>25</sub> O <sub>20</sub> S <sub>5</sub> ) <sub>3</sub> ·35.1H <sub>2</sub> O                                                                                                                                |
| UMOKIT        | 2.396 Å                               | Tan, Y.-H. CCDC deposition number 911646, <b>2021</b> . [Gd(H <sub>2</sub> O) <sub>8</sub> ](C <sub>6</sub> H <sub>4</sub> N <sub>5</sub> ) <sub>3</sub> ·2C <sub>6</sub> H <sub>5</sub> N <sub>5</sub> ·7H <sub>2</sub> O                                                                                                                                                                                                               |
| SEYYIF        | 2.397 Å                               | Hatano, M.; Takagi, E.; Arinobe, M.; Ishihara, K. <i>J. Organomet. Chem.</i> <b>2007</b> , <i>692</i> , 569.<br>[Gd(H <sub>2</sub> O) <sub>8</sub> ] <sub>2</sub> (C <sub>3</sub> F <sub>6</sub> O <sub>6</sub> S <sub>2</sub> ) <sub>3</sub> ·H <sub>2</sub> O                                                                                                                                                                          |
| VOSVEH        | <del>2.444 Å (9)</del><br>2.397 Å (8) | Loh, S. L.; Sobolev, A. N.; Lim, S. H.; Ling, I. <i>CrystEngComm</i> <b>2020</b> , <i>22</i> , 52.<br>[Gd(H <sub>2</sub> O) <sub>8</sub> ][Gd(H <sub>2</sub> O) <sub>9</sub> ](C <sub>16</sub> H <sub>20</sub> N <sub>4</sub> )(C <sub>28</sub> H <sub>20</sub> O <sub>16</sub> S <sub>4</sub> ) <sub>4</sub> ·16H <sub>2</sub> O                                                                                                        |

|             |                              |                                                                                                                                                                                                                                                                                                                                                                                                                                   |
|-------------|------------------------------|-----------------------------------------------------------------------------------------------------------------------------------------------------------------------------------------------------------------------------------------------------------------------------------------------------------------------------------------------------------------------------------------------------------------------------------|
| FILVOL01    | 2.399 Å                      | Janicki, R.; Mondry, A. <i>Dalton Trans.</i> <b>2019</b> , 48, 3380. [Gd(H <sub>2</sub> O) <sub>8</sub> ]Cl <sub>3</sub> ·(C <sub>10</sub> H <sub>20</sub> O <sub>5</sub> )                                                                                                                                                                                                                                                       |
| RACNUG      | 2.399 Å                      | Ling, I.; Alias, Y.; Sobolev, A. N.; Raston, C. L. <i>New J. Chem.</i> <b>2010</b> , 34, 414.<br>[Gd(H <sub>2</sub> O) <sub>8</sub> ](C <sub>13</sub> H <sub>25</sub> N <sub>2</sub> )(C <sub>28</sub> H <sub>20</sub> O <sub>16</sub> S <sub>4</sub> )·5H <sub>2</sub> O                                                                                                                                                         |
| COKMOF      | 2.401 Å                      | Kostakis, G.E.; Abbas, G.; Anson, C. E.; Powell, A. K. <i>CrystEngComm</i> <b>2008</b> , 10, 1117.<br>[Gd(H <sub>2</sub> O) <sub>8</sub> ](C <sub>8</sub> H <sub>5</sub> N <sub>8</sub> ) <sub>3</sub> ·9H <sub>2</sub> O                                                                                                                                                                                                         |
| JOQWAQ      | 2.402 Å                      | Lin, R.-L.; Zhou, J.-J.; Zhou, F. H.; Sun, W.-Q.; Liu, J.-X.; Chen, K. <i>CrystEngComm</i> <b>2019</b> , 21, 5641. [Gd(H <sub>2</sub> O) <sub>8</sub> ][CdCl <sub>4</sub> ]Cl·(C <sub>44</sub> H <sub>52</sub> N <sub>24</sub> O <sub>12</sub> )·5H <sub>2</sub> O                                                                                                                                                                |
| BAXNIX      | 2.403 Å                      | Bukowska-Strzyzewska, M.; Tosik, A. <i>Acta Crystallogr., Sect. B</i> <b>1982</b> , 38, 265.<br>[Gd(H <sub>2</sub> O) <sub>8</sub> ]Cl <sub>3</sub> ·2C <sub>10</sub> H <sub>8</sub> N <sub>2</sub>                                                                                                                                                                                                                               |
| TUKHIT      | 2.409 Å                      | Ling, I.; Sobolev, A. N. <i>Mater. Today: Proc.</i> <b>2018</b> , 5, 166.<br>[Gd(H <sub>2</sub> O) <sub>8</sub> ](C <sub>25</sub> H <sub>22</sub> OP) <sub>4</sub> (C <sub>28</sub> H <sub>21</sub> O <sub>16</sub> S <sub>4</sub> ) <sub>2</sub> (C <sub>28</sub> H <sub>20</sub> O <sub>16</sub> S <sub>4</sub> )Cl·24H <sub>2</sub> O                                                                                          |
| BASLUG      | 2.411 Å                      | Ling, I.; Sobolev, A. N.; Dalgarno, S. J. <i>Supramol. Chem.</i> <b>2020</b> , 33, 71.<br>(P(C <sub>6</sub> H <sub>5</sub> ) <sub>3</sub> CH <sub>3</sub> ) <sub>8</sub> [Gd(H <sub>2</sub> O) <sub>9</sub> ][Gd(H <sub>2</sub> O) <sub>8</sub> ](C <sub>28</sub> H <sub>21</sub> O <sub>16</sub> S <sub>4</sub> ) <sub>4</sub> (CF <sub>3</sub> SO <sub>3</sub> )Cl·20H <sub>2</sub> O                                           |
| FILVOL      | 2.411 Å                      | Rogers, R. D.; Kurihara, L. K. <i>Inorg. Chim. Acta</i> <b>1987</b> , 130, 131-137. [Gd(H <sub>2</sub> O) <sub>8</sub> ]Cl <sub>3</sub> ·2C <sub>10</sub> H <sub>20</sub> O <sub>5</sub>                                                                                                                                                                                                                                          |
| DAXMUM      | 2.428 Å                      | Ling, I.; Alias, Y.; Skelton, B. W.; Raston, C. L. <i>Cryst. Growth Des.</i> <b>2012</b> , 12, 1564.<br>[Gd(H <sub>2</sub> O) <sub>8</sub> ](C <sub>44</sub> H <sub>38</sub> P <sub>2</sub> )(C <sub>35</sub> H <sub>25</sub> O <sub>20</sub> S <sub>5</sub> ) <sub>3</sub> ·35.55H <sub>2</sub> O                                                                                                                                |
| PITZIC      | 2.437 Å                      | Xiang, S.; Hu, S.; Sheng, T.; Fu, R.; Wu, X.; Zhang, X. <i>J. Am. Chem. Soc.</i> <b>2007</b> , 129, 15144.<br>[Gd(H <sub>2</sub> O) <sub>8</sub> ][Cu <sub>12</sub> Gd <sub>6</sub> C <sub>36</sub> H <sub>310</sub> N <sub>18</sub> O <sub>56</sub> ](ClO <sub>4</sub> ) <sub>16</sub> ·14H <sub>2</sub> O                                                                                                                       |
| RACNOA      | 2.445 Å                      | Ling, I.; Alias, Y.; Sobolev, A. N.; Raston, C. L. <i>New J. Chem.</i> <b>2010</b> , 34, 414.<br>[Gd(H <sub>2</sub> O) <sub>9</sub> ][Gd(H <sub>2</sub> O) <sub>8</sub> ](C <sub>25</sub> H <sub>22</sub> OP) <sub>2</sub> (C <sub>13</sub> H <sub>25</sub> N <sub>2</sub> )(C <sub>28</sub> H <sub>19</sub> O <sub>16</sub> S <sub>4</sub> )(C <sub>28</sub> H <sub>20</sub> O <sub>16</sub> S <sub>4</sub> )·14H <sub>2</sub> O |
| <b>Mean</b> | <b>2.401 Å/21 structures</b> |                                                                                                                                                                                                                                                                                                                                                                                                                                   |

*Nine-coordination, tricapped trigonal prism*

| ICSD/CSD code | $d(\text{Gd-O})_p + d(\text{Gd-O})_c$ | Reference, compound formula                                                                                                                                                                                                                                                     |
|---------------|---------------------------------------|---------------------------------------------------------------------------------------------------------------------------------------------------------------------------------------------------------------------------------------------------------------------------------|
| 37207         | 2.396 + 2.540 Å                       | Harrowfield, J. Mc. B.; Kepert, D. L.; Patrick, J. M.; White, A. H. <i>Aust. J. Chem.</i> <b>1983</b> , 36, 483.<br>[Gd(H <sub>2</sub> O) <sub>9</sub> ](CF <sub>3</sub> SO <sub>3</sub> ) <sub>3</sub>                                                                         |
| BUVVOD01      | 2.398 + 2.536 Å                       | Chatterjee, A.; Maslen, E. N.; Watson, K. J. <i>Acta Crystallogr., Sect. B</i> <b>1988</b> , 44, 381.<br>[Gd(H <sub>2</sub> O) <sub>6</sub> ](CF <sub>3</sub> SO <sub>3</sub> ) <sub>3</sub>                                                                                    |
| ZZZARA01      | 2.401 + 2.537 Å                       | Gerkin, R. E.; Reppart, W. J. <i>Acta Crystallogr., Sect. C</i> <b>1984</b> , 40, 781. [Gd(H <sub>2</sub> O) <sub>9</sub> ](C <sub>2</sub> H <sub>5</sub> SO <sub>4</sub> ) <sub>3</sub>                                                                                        |
| BUVVOD02      | 2.405 + 2.519 Å                       | Batsanov, A. S.; Murray, B.; Parker, D. CCDC deposition number 725072, <b>2009</b> . [Gd(H <sub>2</sub> O) <sub>6</sub> ](CF <sub>3</sub> SO <sub>3</sub> ) <sub>3</sub>                                                                                                        |
| GIBVET        | 2.407 + 2.622 Å                       | Wang, F.-Q.; Zheng, X.-J.; Wan, Y.-H.; Sun, C.-Y.; Wang, Z.-M.; Wang, K.-Z.; Jin, L.-P. <i>Inorg. Chem.</i> <b>2007</b> , 46, 2956. (H(H <sub>2</sub> O) <sub>7</sub> )[Gd(H <sub>2</sub> O) <sub>9</sub> ][CuGdC <sub>18</sub> H <sub>6</sub> N <sub>6</sub> O <sub>12</sub> ] |
| BUVVOD03      | 2.410 + 2.521 Å                       | Janicki, R.; Mondry, A. <i>Dalton Trans.</i> <b>2019</b> , 48, 3380. [Gd(H <sub>2</sub> O) <sub>6</sub> ](CF <sub>3</sub> SO <sub>3</sub> ) <sub>3</sub>                                                                                                                        |

132002 2.411 + 2.521 Å Janicki, R.; Starynowicz, P. *Acta Crystallogr., Sect. E* **2020**, 76, 572. [Gd(H<sub>2</sub>O)<sub>6</sub>](CF<sub>3</sub>SO<sub>3</sub>)<sub>3</sub>  
 BUVVOD04  
**Mean 2.404 + 2.542 Å/7 structures, mean: 2.450 Å**

*Nine-coordination*

| ICSD/CSD code   | <i>d</i> (Gd-O)              | Reference, compound formula                                                                                                                                                                                                                                                                                                                                                                                                                            |
|-----------------|------------------------------|--------------------------------------------------------------------------------------------------------------------------------------------------------------------------------------------------------------------------------------------------------------------------------------------------------------------------------------------------------------------------------------------------------------------------------------------------------|
| BASLUG          | 2.403 Å                      | Ling, I.; Sobolev, A. N.; Dalgarno, S. <i>J. Supramol. Chem.</i> <b>2020</b> , 33, 71.<br>(P(C <sub>6</sub> H <sub>5</sub> ) <sub>3</sub> CH <sub>3</sub> ) <sub>8</sub> [Gd(H <sub>2</sub> O) <sub>9</sub> ][Gd(H <sub>2</sub> O) <sub>8</sub> ](C <sub>28</sub> H <sub>21</sub> O <sub>16</sub> S <sub>4</sub> ) <sub>4</sub> (CF <sub>3</sub> SO <sub>3</sub> )Cl·20H <sub>2</sub> O                                                                |
| OHAMEQ          | 2.404 Å                      | Ling, I.; Alias, Y.; Sobolev, A. N.; Raston, C. L. <i>Cryst. Growth Des.</i> <b>2009</b> , 9, 4497.<br>[Na <sub>2</sub> (H <sub>2</sub> O) <sub>9</sub> ][Gd(H <sub>2</sub> O) <sub>9</sub> ] <sub>2</sub> ((C <sub>6</sub> H <sub>5</sub> ) <sub>4</sub> P) <sub>4</sub> (C <sub>16</sub> H <sub>20</sub> N <sub>4</sub> ) <sub>2</sub> (C <sub>28</sub> H <sub>20</sub> O <sub>16</sub> S <sub>4</sub> ) <sub>4</sub> ·22H <sub>2</sub> O            |
| AHADAP          | 2.428 Å                      | Ling, I.; Alias, Y.; Sobolev, A. N.; Raston, C. L. <i>CrystEngComm</i> <b>2010</b> , 12, 573.<br>[Gd(H <sub>2</sub> O) <sub>9</sub> ](C <sub>25</sub> H <sub>22</sub> OP)(C <sub>12</sub> H <sub>23</sub> N <sub>2</sub> )(C <sub>28</sub> H <sub>19</sub> O <sub>16</sub> S <sub>4</sub> )·6H <sub>2</sub> O                                                                                                                                          |
| BASMAN          | 2.435 Å                      | Ling, I.; Sobolev, A. N.; Dalgarno, S. <i>J. Supramol. Chem.</i> <b>2020</b> , 33, 71.<br>(P(C <sub>6</sub> H <sub>5</sub> ) <sub>3</sub> CH <sub>3</sub> ) <sub>2</sub> (C <sub>8</sub> H <sub>15</sub> N <sub>2</sub> )[Gd(H <sub>2</sub> O) <sub>9</sub> ][Gd(H <sub>2</sub> O) <sub>7</sub> (OC <sub>28</sub> H <sub>19</sub> O <sub>15</sub> S <sub>4</sub> )](C <sub>28</sub> H <sub>19</sub> O <sub>16</sub> S <sub>4</sub> )·8H <sub>2</sub> O |
| BASMIV          | 2.435 Å                      | Ling, I.; Sobolev, A. N.; Dalgarno, S. <i>J. Supramol. Chem.</i> <b>2020</b> , 33, 71.<br>(P(C <sub>6</sub> H <sub>5</sub> ) <sub>3</sub> CH <sub>3</sub> ) <sub>6</sub> (C <sub>16</sub> H <sub>20</sub> N <sub>4</sub> )[Gd(H <sub>2</sub> O) <sub>9</sub> ] <sub>1.33</sub> (C <sub>28</sub> H <sub>19</sub> O <sub>16</sub> S <sub>4</sub> ) <sub>4</sub> ·27H <sub>2</sub> O                                                                      |
| 91457           | 2.438 Å                      | Lim, K. C.; Skelton, B. W.; White, A. H. <i>Aust. J. Chem.</i> <b>2000</b> , 53, 867-873. [Gd(H <sub>2</sub> O) <sub>9</sub> ] <sub>3</sub>                                                                                                                                                                                                                                                                                                            |
| OHAMOA          | 2.440 Å                      | Ling, I.; Alias, Y.; Sobolev, A. N.; Raston, C. L. <i>Cryst. Growth Des.</i> <b>2009</b> , 9, 4497.<br>[Gd(H <sub>2</sub> O) <sub>9</sub> ] <sub>3</sub> ((C <sub>6</sub> H <sub>5</sub> ) <sub>4</sub> P) <sub>3</sub> (C <sub>22</sub> H <sub>32</sub> N <sub>4</sub> )(C <sub>28</sub> H <sub>20</sub> O <sub>16</sub> S <sub>4</sub> ) <sub>2</sub> ·21H <sub>2</sub> O                                                                            |
| BASMER          | 2.442 Å                      | Ling, I.; Sobolev, A. N.; Dalgarno, S. <i>J. Supramol. Chem.</i> <b>2020</b> , 33, 71.<br>(P(C <sub>6</sub> H <sub>5</sub> ) <sub>3</sub> CH <sub>3</sub> )(C <sub>12</sub> H <sub>23</sub> N <sub>2</sub> )[Gd(H <sub>2</sub> O) <sub>9</sub> ](C <sub>28</sub> H <sub>19</sub> O <sub>16</sub> S <sub>4</sub> )·2H <sub>2</sub> O                                                                                                                    |
| VOSVEH          | 2.444 Å (9)<br>2.397 Å (8)   | Loh, S. L.; Sobolev, A. N.; Lim, S. H.; Ling, I. <i>CrystEngComm</i> <b>2020</b> , 22, 52.<br>[Gd(H <sub>2</sub> O) <sub>8</sub> ][Gd(H <sub>2</sub> O) <sub>9</sub> ](C <sub>16</sub> H <sub>20</sub> N <sub>4</sub> )(C <sub>28</sub> H <sub>20</sub> O <sub>16</sub> S <sub>4</sub> ) <sub>4</sub> ·16H <sub>2</sub> O                                                                                                                              |
| WEXCUZ          | 2.447 Å                      | Alikberova, L. Y.; Albov, D. V.; Antonenko, T. A.; Kochetova, I. M.; Rukk, N. S. <i>Vestnik MITHT</i> <b>2010</b> , 5, 30. [Gd(H <sub>2</sub> O) <sub>9</sub> ] <sub>3</sub> ·2CH <sub>4</sub> N <sub>2</sub> S                                                                                                                                                                                                                                        |
| LUZXEK          | 2.461 Å                      | Ling, I.; Alias, Y.; Skelton, B. W. Raston, C. L. <i>Aust. J. Chem.</i> <b>2010</b> , 63, 1492.<br>[Gd(H <sub>2</sub> O) <sub>9</sub> ](C <sub>25</sub> H <sub>22</sub> OP)(C <sub>6</sub> H <sub>11</sub> N <sub>2</sub> O)(C <sub>28</sub> H <sub>19</sub> O <sub>16</sub> S <sub>4</sub> )·4.5H <sub>2</sub> O                                                                                                                                      |
| <b>Mean</b>     | <b>2.434 Å/11 structures</b> |                                                                                                                                                                                                                                                                                                                                                                                                                                                        |
| <b>Mean all</b> | <b>2.440 Å/18 structures</b> |                                                                                                                                                                                                                                                                                                                                                                                                                                                        |

**Table S1t.** Summary of solid state structures containing a hydrated terbium(III) ion. The ICSD/CDS code refers to the code in the Inorganic Crystal Structure Database (ICSD, number) and Cambridge Structure Database (CSD, letters), respectively, and the mean Tb-O bond distance,  $d(\text{Tb-O})$ ;  $d(\text{Tb-O})_p$  denotes ligands forming the prism and  $d(\text{Tb-O})_c$  the capping ligands in tricapped trigonal prismatic configuration. Data in purple text are not included in the mean distance as they are uncertain or differ significantly from the mean value.

### Terbium(III)

#### Six-coordination

| ICSD/CSD code | $d(\text{Tb-O})$ | Reference, compound formula                                                                                                              |
|---------------|------------------|------------------------------------------------------------------------------------------------------------------------------------------|
| 31757         | 2.218 Å          | Glaser, J.; Johansson, G., <i>Acta Chem. Scand., Ser. A</i> <b>1981</b> , 35, 639. $[\text{Tb}(\text{H}_2\text{O})_6](\text{ClO}_4)_3$ . |

#### Eight-coordination

| ICSD/CSD code | $d(\text{Tb-O})$ | Reference, compound formula                                                                                                                                                                                                                                                                        |
|---------------|------------------|----------------------------------------------------------------------------------------------------------------------------------------------------------------------------------------------------------------------------------------------------------------------------------------------------|
| NAJNAQ        | 2.363 Å          | Falk, F.; Hackbarth, L.; Lochbrunner, S.; Marciniak, H.; Kockerling, M. <i>Eur. J. Inorg. Chem.</i> <b>2016</b> , 469. $[\text{Tb}(\text{H}_2\text{O})_8](\text{B}(\text{CN})_4)_3 \cdot 2.58\text{H}_2\text{O}$                                                                                   |
| XUCYIF        | 2.363 Å          | Wang, C.-Z.; Zhao, W.-X.; Zhang, Y.-Q.; Xue, S.-F.; Tao, Z.; Zhu, Q.-J. <i>ChemPlusChem</i> <b>2015</b> , 80, 1052. $[\text{Tb}(\text{H}_2\text{O})_8]\text{Cl}_3 \cdot (\text{C}_{42}\text{H}_{48}\text{N}_{24}\text{O}_{12}) \cdot 14\text{H}_2\text{O}$                                         |
| GAHTOB        | 2.366 Å          | Zhao, W.; Wang, C.; Zhang, Y.; Zhang, Y.; Xue, S.; Tao, Z.; Clegg, J. K.; Zhu, Q., Lindoy, L. F.; Wei, G. <i>New J. Chem.</i> <b>2016</b> , 40, 2763. $[\text{Tb}(\text{H}_2\text{O})_8](\text{C}_{42}\text{H}_{45}\text{N}_{24}\text{O}_{18}) \cdot 27\text{H}_2\text{O}$                         |
| IPIFAQ        | 2.371 Å          | Yang, B.; Gao, Z.-Z.; Lu, J.-H.; Zhu, Q.-J.; Xue, S.-F.; Tao, Z.; Prior, T. J.; Redshaw, C.; Wei, G.; Xiao, X. <i>CrystEngComm</i> <b>2016</b> , 18, 5028. $[\text{Tb}(\text{H}_2\text{O})_8]\text{Cl}_3 \cdot (\text{C}_{44}\text{H}_{44}\text{N}_{24}\text{O}_{12}) \cdot 4.5\text{H}_2\text{O}$ |
| XUMKEV        | 2.373 Å          | Atwood, J. L.; Barbour, L. J.; Dalgarno, S.; Raston, C. L.; Webb, H. R. <i>J. Chem. Soc., Dalton Trans.</i> <b>2002</b> , 4351. $[\text{Tb}(\text{H}_2\text{O})_8](\text{C}_{28}\text{H}_{21}\text{O}_{16}\text{S}_4) \cdot 16\text{H}_2\text{O}$                                                  |
| HIDDUV        | 2.379 Å          | Yamada, M.; Hamada, F. <i>CrystEngComm</i> <b>2013</b> , 15, 5703. $[\text{Tb}(\text{H}_2\text{O})_8]_2(\text{C}_{36}\text{H}_{18}\text{O}_{24})\text{S}_{12} \cdot 16\text{H}_2\text{O}$                                                                                                          |
| RORREX        | 2.380 Å          | Thuery, P.; Harrowfield, J. <i>Cryst. Growth Des.</i> <b>2014</b> , 14, 4214. $[\text{Tb}(\text{H}_2\text{O})_8]_2[(\text{UO}_2)_2\text{C}_{18}\text{H}_{18}\text{O}_{12}]_3 \cdot 12\text{H}_2\text{O}$                                                                                           |
| VEHMED        | 2.381 Å          | Shen, F.-F.; Chen, K.; Hua, Z.-Y.; Wang, Y.; Xu, J.; Chen, M.-D.; Zhang, Y.-Q.; Tao, Z. <i>CrystEngComm</i> <b>2017</b> , 19, 5635. $[\text{Tb}(\text{H}_2\text{O})_8]\text{Cl}_3 \cdot (\text{C}_{44}\text{H}_{52}\text{N}_{24}\text{O}_{14}) \cdot 10\text{H}_2\text{O}$                         |
| TAHDAl        | 2.385 Å          | Dalgarno, S. J.; Hardie, M.J.; Makha, M.; Raston, C. L., <i>Chem. Eur. J.</i> <b>2003</b> , 9, 2834. $[\text{Tb}(\text{H}_2\text{O})_8][\text{TbC}_{42}\text{H}_{44}\text{O}_{31}\text{S}_6] \cdot \text{C}_{12}\text{H}_{24}\text{O}_6 \cdot 22\text{H}_2\text{O}$                                |
| VUMQUQ        | 2.385 Å          | Steinhauser, G.; Giester, CG.; Wagner, C.; Leopold, N.; Sterba, J. H.; Lendl, B.; Bichler, M. <i>Helv. Chim. Acta</i> <b>2009</b> , 92, 1371. $[\text{Tb}(\text{H}_2\text{O})_8]_2(\text{C}_2\text{N}_{10})_3 \cdot 6\text{H}_2\text{O}$                                                           |



|             |                              |                                                                                                                                                                                                                                                                                                                                            |
|-------------|------------------------------|--------------------------------------------------------------------------------------------------------------------------------------------------------------------------------------------------------------------------------------------------------------------------------------------------------------------------------------------|
| KIZGEG      | 2.385 Å                      | Eulgem, P.J.; Klein, A.; Maggiorosa, N.; Naumann, D.; Pohl, R. W. H. <i>Chem. Eur. J.</i> <b>2008</b> , <i>14</i> , 3727. [Tb(H <sub>2</sub> O) <sub>8</sub> ] <sub>2</sub> (C <sub>2</sub> H <sub>8</sub> ) <sub>3</sub> ·3 H <sub>2</sub> O                                                                                              |
| XIDZUG      | 2.390 Å                      | Dong, Y.-B.; Wang, P.; Ma, J.-P.; Zhao, X.-X.; Wang, H.-Y.; Tang, B.; Huang, R.-Q. <i>J. Am. Chem. Soc.</i> <b>2007</b> , <i>129</i> , 4872. [Tb(H <sub>2</sub> O) <sub>8</sub> ][Tb <sub>2</sub> C <sub>64</sub> H <sub>44</sub> N <sub>16</sub> O <sub>18</sub> ]Cl·2H <sub>2</sub> O                                                    |
| JUHFOJ      | 2.391 Å                      | Yu, X.; Clegg, J. K.; Zhang, Y.-Q.; Xue, S.-F.; Tao, Z.; Zhu, Q.-J.; Lindoy, L. F.; Wei, G. <i>Polyhedron</i> <b>2015</b> , <i>91</i> , 150. [Tb(H <sub>2</sub> O) <sub>8</sub> ]Cl(NO <sub>3</sub> ) <sub>2</sub> ·(C <sub>44</sub> H <sub>44</sub> N <sub>24</sub> O <sub>12</sub> )·9H <sub>2</sub> O                                   |
| NERJAX      | 2.391 Å                      | Czylkowska, A.; Kruszyski, R.; Kaczmarek, A.; Markiewicz M. <i>Zh. Strukt. Khim.</i> <b>2012</b> , <i>53</i> , 946. [Tb(H <sub>2</sub> O) <sub>8</sub> ](C <sub>9</sub> H <sub>10</sub> N <sub>2</sub> )(CCl <sub>3</sub> COO) <sub>4</sub> ·2(C <sub>10</sub> H <sub>8</sub> N <sub>2</sub> )·4H <sub>2</sub> O                           |
| YECSEO      | 2.395 Å                      | Kepert, C. J.; Skelton, B. W.; White, A. H. <i>Aust. J. Chem.</i> <b>1994</b> , <i>47</i> , 391. [Tb(H <sub>2</sub> O) <sub>8</sub> ](C <sub>15</sub> H <sub>613</sub> N <sub>3</sub> ) <sub>2</sub> Cl <sub>7</sub> ·2.33H <sub>2</sub> O                                                                                                 |
| VIHLOP      | 2.403 Å                      | Hou, X.-Y.; Fu, F.; Wang, J.-J.; Tang, L.; Cao, J.; Lei, L. Z. <i>Kristallogr.- New Cryst. Struct.</i> <b>2013</b> , <i>228</i> , 295. [Tb(H <sub>2</sub> O) <sub>8</sub> ] <sub>2</sub> (C <sub>14</sub> H <sub>6</sub> O <sub>8</sub> S <sub>2</sub> ) <sub>3</sub> ·3(C <sub>10</sub> H <sub>8</sub> N <sub>2</sub> )·6H <sub>2</sub> O |
| 132045      | 2.413 Å                      | Kang, R.; Cao, J.; Han, Y.; Hong, Y.; Yang, M.; Xu, Y. Z. <i>Anorg. Allg. Chem.</i> <b>2020</b> , <i>646</i> , 1315. [Tb(H <sub>2</sub> O) <sub>8</sub> ](V <sub>10</sub> O <sub>28</sub> )·6H <sub>2</sub> O                                                                                                                              |
| <b>Mean</b> | <b>2.383 Å/17 structures</b> |                                                                                                                                                                                                                                                                                                                                            |

*Nine-coordination, tricapped trigonal prism*

ICSD/CSD code  $d(\text{Tb-O})_p + d(\text{Tb-O})_c$  Reference, compound formula

|             |                                                    |                                                                                                                                                                                                                                             |
|-------------|----------------------------------------------------|---------------------------------------------------------------------------------------------------------------------------------------------------------------------------------------------------------------------------------------------|
| BUVXEVO1    | 2.380 + 2.527 Å                                    | Chatterjee, A.; Maslen, E. N.; Watson, K. J., <i>Acta Crystallogr., Sect. B</i> <b>1988</b> , <i>44</i> , 381. [Tb(H <sub>2</sub> O) <sub>9</sub> ](CF <sub>3</sub> SO <sub>3</sub> ) <sub>3</sub>                                          |
| ZZZARD01    | 2.382 + 2.526 Å                                    | Gerkin, R. E.; Reppart, W. J., <i>Acta Crystallogr., Sect. C</i> <b>1984</b> , <i>40</i> , 781. [Tb(H <sub>2</sub> O) <sub>9</sub> ](C <sub>2</sub> H <sub>5</sub> SO <sub>4</sub> ) <sub>3</sub>                                           |
| BUVXEVO2    | 2.383 + 2.530 Å                                    | Abbasi, A.; Lindqvist-Reis, P.; Eriksson, L.; Sandström, D.; Lidin, S.; Persson, I.; Sandström, M. <i>Chem. Eur. J.</i> <b>2005</b> , <i>11</i> , 4065. [Tb(H <sub>2</sub> O) <sub>9</sub> ](CF <sub>3</sub> SO <sub>3</sub> ) <sub>3</sub> |
| BUVXEVO3    | 2.392 + 2.516 Å                                    | Nelyubina, Y. V.; Puntus, L. N.; Lyssenko, K. A. <i>Chem. Eur. J.</i> <b>2014</b> , <i>20</i> , 2860. [Tb(H <sub>2</sub> O) <sub>9</sub> ](CF <sub>3</sub> SO <sub>3</sub> ) <sub>3</sub>                                                   |
| 300025      | 2.405 + 2.469 Å                                    | Gallucci, J. C.; Gerkin, R. E.; Reppart, W. J. <i>Cryst. Struct. Commun.</i> <b>1982</b> , <i>11</i> , 1141. [Tb(H <sub>2</sub> O) <sub>9</sub> ](BrO <sub>3</sub> ) <sub>3</sub>                                                           |
| <b>Mean</b> | <b>2.388 + 2.514 Å/5 structures; mean: 2.430 Å</b> |                                                                                                                                                                                                                                             |

Nine-coordination

| ICSD/CSD code   | $d(\text{Tb-O})$            | Reference, compound formula                                                                                                                                                                                          |
|-----------------|-----------------------------|----------------------------------------------------------------------------------------------------------------------------------------------------------------------------------------------------------------------|
| 421756          | 2.420 Å                     | Rukk, N. S.; Albov, D. V.; Skryabina, A. Y.; Kravchenko, V. V.; Mavrin, B. N.; Zamalyutin, V. V.; Alikberova, L. Y. <i>Koord. Khim.</i> <b>2011</b> , <i>36</i> , 643. $[\text{Tb}(\text{H}_2\text{O})_9]\text{I}_3$ |
| <b>Mean</b>     | <b>2.420 Å/1 structure</b>  |                                                                                                                                                                                                                      |
| <b>Mean all</b> | <b>2.428 Å/6 structures</b> |                                                                                                                                                                                                                      |

**Table S1u.** Summary of solid state structures containing a hydrated dysprosium(III) ion. The ICSD/CDS code refers to the code in the Inorganic Crystal Structure Database (ICSD, number) and Cambridge Structure Database (CSD, letters), respectively, and the mean Dy-O bond distance,  $d(\text{Dy-O})$ ;  $d(\text{Dy-O})_p$  denotes ligands forming the prism and  $d(\text{Dy-O})_c$  the capping ligands in tricapped trigonal prismatic configuration. Data in purple text are not included in the mean distance as they are uncertain or differ significantly from the mean value.

### Dysprosium(III)

#### Eight-coordination

| ICSD/CSD code | $d(\text{Dy-O})$ | Reference, compound formula                                                                                                                                                                                                                                                                                          |
|---------------|------------------|----------------------------------------------------------------------------------------------------------------------------------------------------------------------------------------------------------------------------------------------------------------------------------------------------------------------|
| KUXQUQ        | 2.356 Å          | Steinhauser, G.; Giester, G.; Leopold, N.; Wagner, C.; Villa, M.; Musilek, A. <i>Helv. Chim. Acta</i> <b>2010</b> , <i>93</i> , 183. $[\text{Dy}(\text{H}_2\text{O})_8]_2(\text{C}_2\text{N}_{10})_3 \cdot 4(\text{CHN}_7) \cdot 8\text{H}_2\text{O}$                                                                |
| IPIFOE        | 2.358 Å          | Yang, B.; Gao, Z.-Z.; Lu, J.-H.; Zhu, Q.-J.; Xue, S.-F.; Tao, Z.; Prior, T. J.; Redshaw, C.; Wei, G.; Xiao, X. <i>CrystEngComm</i> <b>2016</b> , <i>18</i> , 5028. $[\text{Dy}(\text{H}_2\text{O})_8]\text{Cl}_3 \cdot \text{C}_{44}\text{H}_{44}\text{N}_{24}\text{O}_{12} \cdot 8\text{H}_2\text{O}$               |
| NAJVOM        | 2.359 Å          | Falk, F.; Hackbarth, L.; Lochbrunner, S.; Marciniak, H.; Kockerling, M. <i>Eur. J. Inorg. Chem.</i> <b>2016</b> , 469. $[\text{Dy}(\text{H}_2\text{O})_8](\text{B}(\text{CN})_4)_3 \cdot 2.33\text{H}_2\text{O}$                                                                                                     |
| CEQMIX        | 2.364 Å          | Chesnokov, G. A.; Topchiy, M. A.; Asachenko, A. F.; Muravyev, N. V.; Grishin, L. I.; Nikiforova, A. S.; Utochnikova, V. V.; Rybakov, V. B.; Khrustalev, V. N.; Nechaev, M. S. <i>Eur. J. Inorg. Chem.</i> <b>2018</b> , 805. $[\text{Dy}(\text{H}_2\text{O})_8]_2(\text{C}_2\text{N}_8)_3 \cdot 4\text{H}_2\text{O}$ |
| 132046        | 2.365 Å          | Kang, R.; Cao, J.; Han, Y.; Hong, Y.; Yang, M.; Xu, Y. <i>Z. Anorg. Allg. Chem.</i> <b>2020</b> , <i>646</i> , 1315. $[\text{Ho}(\text{H}_2\text{O})_8](\text{V}_{10}\text{O}_{28}) \cdot 6\text{H}_2\text{O}$                                                                                                       |
| TIWXIH        | 2.366 Å          | Yamada, M.; Kondo, Y.; Hamada, F. <i>Tetrahedron Lett.</i> <b>2008</b> , <i>49</i> , 1790. $[\text{Dy}(\text{H}_2\text{O})_8]_2(\text{C}_{36}\text{H}_{18}\text{O}_{24}\text{S}_{12}) \cdot 15\text{H}_2\text{O}$                                                                                                    |
| MUQROG        | 2.367 Å          | Trzesowska-Kruszynska, A.; Kruszynski, R.; Zalewicz, M.; Bartczak, T. J. <i>J. Coord. Chem.</i> <b>2010</b> , <i>63</i> , 1013. $[\text{Dy}(\text{H}_2\text{O})_8](\text{NO}_3)_3 \cdot 2\text{C}_6\text{H}_{12}\text{N}_4 \cdot 2\text{H}_2\text{O}$                                                                |
| AQOWIO        | 2.368 Å          | Al Hareri, M.; Gavey, E. L.; Regier, J.; Ras Ali, Z.; Carlos, L. D.; Ferreira, R. A. S.; Pilkington, M. <i>Chem. Commun.</i> <b>2016</b> , <i>52</i> , 11335. $[\text{Dy}(\text{H}_2\text{O})_8](\text{ClO}_4)_3 \cdot 3\text{C}_{14}\text{H}_{20}\text{O}_5$                                                        |
| SERQOZ        | 2.371 Å          | Bai, Z.; Scheibe, B.; Sperling, J. M.; Albrecht-Schonzart, T. E. <i>Cryst. Growth Des.</i> <b>2022</b> , <i>22</i> , 5504. $[\text{Dy}(\text{H}_2\text{O})_8](\text{C}_3\text{H}_5\text{N}_6)_3 \cdot 3\text{H}_2\text{O}$                                                                                           |
| SIQVEW        | 2.372 Å          | Bousrez, G.; Andrews, P. C.; Junk, P. C.; Thielemann, D. T.; Wang, J. <i>Aust. J. Chem.</i> <b>2018</b> , <i>71</i> , 939. $[(\text{Dy}(\text{H}_2\text{O})_8)(\text{C}_{11}\text{H}_8\text{I}_3\text{N}_2\text{O}_4)_3] \cdot 7\text{H}_2\text{O}$                                                                  |
| VUMRAX        | 2.372 Å          | Steinhauser, G.; Giester, CG.; Wagner, C.; Leopold, N.; Sterba, J. H.; Lendl, B.; Bichler, M. <i>Helv. Chim. Acta</i> <b>2009</b> , <i>92</i> , 1371. $[\text{Dy}(\text{H}_2\text{O})_8]_2(\text{C}_2\text{N}_{10})_3 \cdot 6\text{H}_2\text{O}$                                                                     |

|             |                              |                                                                                                                                                                                                                                                                                                                 |
|-------------|------------------------------|-----------------------------------------------------------------------------------------------------------------------------------------------------------------------------------------------------------------------------------------------------------------------------------------------------------------|
| JOQWEU      | 2.374 Å                      | Lin, R.-L.; Zhou, J.-J.; Zhou, F. H.; Sun, W.-Q.; Liu, J.-X.; Chen, K. <i>CrystEngComm</i> <b>2019</b> , <i>21</i> , 5641. [(Dy(H <sub>2</sub> O) <sub>8</sub> )[CdCl <sub>4</sub> ]Cl·C <sub>44</sub> H <sub>52</sub> N <sub>24</sub> O <sub>12</sub> ·6H <sub>2</sub> O                                       |
| QUTRON      | 2.374 Å                      | Liu, L.; Li, F.; Xu, L.; Liu, X.; Gao, G. <i>J. Solid State Chem.</i> <b>2010</b> , <i>183</i> , 350. ((CH <sub>3</sub> ) <sub>4</sub> N) <sub>8</sub> [(Dy(H <sub>2</sub> O) <sub>8</sub> ) <sub>2</sub> [H <sub>8</sub> Dy <sub>2</sub> As <sub>4</sub> W <sub>34</sub> O <sub>126</sub> ]·31H <sub>2</sub> O |
| NIRGOM      | 2.378 Å                      | Knoll, C.; Muller, D.; Giester, G.; Ofner, J.; Lendl, B.; Weinberger, P.; Steinhäuser, G. <i>New. J. Chem.</i> <b>2013</b> , <i>37</i> , 3840. [(Dy(H <sub>2</sub> O) <sub>8</sub> ) <sub>2</sub> (C <sub>2</sub> N <sub>10</sub> ) <sub>3</sub>                                                                |
| FIZKUU      | 2.379 Å                      | Rogers, R. D.; Kurihara, L. K.; Voss, E. J. <i>Inorg. Chem.</i> <b>1987</b> , <i>26</i> , 2360. [Dy(H <sub>2</sub> O) <sub>8</sub> ]Cl <sub>3</sub> ·2C <sub>10</sub> H <sub>20</sub> O <sub>5</sub>                                                                                                            |
| JUHFUP      | 2.386 Å                      | Yu, X.; Clegg, J. K.; Zhang, Y.-Q.; Xue, S.-F.; Tao, Z.; Zhu, Q.-J.; Lindoy, L. F.; Wei, G. <i>Polyhedron</i> <b>2015</b> , <i>91</i> , 150. [Tb(H <sub>2</sub> O) <sub>8</sub> ]Cl(NO <sub>3</sub> ) <sub>2</sub> ·(C <sub>44</sub> H <sub>44</sub> N <sub>24</sub> O <sub>12</sub> )·9H <sub>2</sub> O        |
| FOPNAZ      | 2.387 Å                      | Rogers, R. D. <i>Inorg. Chim. Acta</i> <b>1987</b> , <i>133</i> , 347. [Dy(H <sub>2</sub> O) <sub>8</sub> ]Cl <sub>3</sub> ·C <sub>12</sub> H <sub>24</sub> O <sub>6</sub> ·4H <sub>2</sub> O                                                                                                                   |
| XUCYOL      | 2.462 Å                      | Wang, C.-Z.; Zhao, W.-X.; Zhang, Y.-Q.; Xue, S.-F.; Tao, Z.; Zhu, Q.-J.; <i>ChemPlusChem</i> <b>2015</b> , <i>80</i> , 1052. [Dy(H <sub>2</sub> O) <sub>8</sub> ]Cl <sub>3</sub> ·(C <sub>42</sub> H <sub>48</sub> N <sub>24</sub> O <sub>12</sub> )·12H <sub>2</sub> O                                         |
| <b>Mean</b> | <b>2.371 Å/17 structures</b> |                                                                                                                                                                                                                                                                                                                 |

*Nine-coordination, tricapped trigonal prism*

ICSD/CSD code  $d(\text{Dy-O})_p + d(\text{Dy-O})_c$  Reference, compound formula

BUVXIZ01 2.364 + 2.520 Å Chatterjee, A.; Maslen, E. N.; Watson, K. J. *Acta Crystallogr., Sect. B* **1988**, *44*, 381. [Dy(H<sub>2</sub>O)<sub>9</sub>](CF<sub>3</sub>SO<sub>3</sub>)<sub>3</sub>.

ZZZARG01 2.371 + 2.517 Å Gerkin, R. E.; Reppart, W. J. *Acta Crystallogr., Sect. C* **1984**, *40*, 781. [Dy(H<sub>2</sub>O)<sub>9</sub>](C<sub>2</sub>H<sub>5</sub>SO<sub>4</sub>)<sub>3</sub>.

**Mean 2.368 + 2.519 Å/2 structures, mean 2.418 Å**

*Nine-coordination*

ICSD/CSD code  $d(\text{Dy-O})$  Reference, compound formula

EQERID 2.416 Å Liu, D.-P.; Peng, J.-B.; Lin, X.-P.; Huang, Q.; Kong, X.-J.; Long, L.-S.; Huang, R.-B.; Zheng, L.-S. *CrystEngComm* **2014**, *16*, 5527. [Dy(H<sub>2</sub>O)<sub>9</sub>][Dy<sub>24</sub>Mn<sub>2</sub>C<sub>96</sub>H<sub>260</sub>O<sub>155</sub>](ClO<sub>4</sub>)<sub>29</sub>·4C<sub>2</sub>H<sub>5</sub>OH·80H<sub>2</sub>O

GIKFOX 2.421 Å Antonenko, T. A.; Alikberova, L. Y.; Albov, D. V.; Rukk, N. S. *Zh. Strukt. Khim.* **2013**, *54*, 141. [Dy(H<sub>2</sub>O)<sub>9</sub>]<sub>3</sub>·2(SC(NH<sub>2</sub>)<sub>2</sub>)

XENRER 2.436 Å Tabuchi, R.; Takezawa, H.; Fujita, M. *Angew. Chem., Int. Ed.* **2022**, *61*, e202208866.

[Dy(H<sub>2</sub>O)<sub>9</sub>][Pd<sub>6</sub>C<sub>108</sub>H<sub>144</sub>N<sub>36</sub>](C<sub>12</sub>H<sub>15</sub>O<sub>9</sub>S<sub>3</sub>)<sub>4</sub>(NO<sub>3</sub>)<sub>3</sub>·41.5H<sub>2</sub>O

EQEREZ 2.438 Å Liu, D.-P.; Peng, J.-B.; Lin, X.-P.; Huang, Q.; Kong, X.-J.; Long, L.-S.; Huang, R.-B.; Zheng, L.-S. *CrystEngComm* **2014**, *16*, 5527. [Dy(H<sub>2</sub>O)<sub>9</sub>][Dy<sub>24</sub>Ni<sub>2</sub>C<sub>96</sub>H<sub>260</sub>O<sub>155</sub>](ClO<sub>4</sub>)<sub>29</sub>·4C<sub>2</sub>H<sub>5</sub>OH·80H<sub>2</sub>O

**Mean 2.428 Å/4 structures**

**Mean all 2.425 Å/6 structures**

**Table S1v.** Summary of solid state structures containing a hydrated holmium(III) ion. The ICSD/CDS code refers to the code in the Inorganic Crystal Structure Database (ICSD, number) and Cambridge Structure Database (CSD, letters), respectively, and the mean Ho-O bond distance,  $d(\text{Ho-O})$ ;  $d(\text{Ho-O})_p$  denotes ligands forming the prism and  $d(\text{Ho-O})_c$  the capping ligands in tricapped trigonal prismatic configuration. Data in purple text are not included in the mean distance as they are uncertain or differ significantly from the mean value.

### Holmium(III)

#### Eight-coordination

| ICSD/CSD code | $d(\text{Ho-O})$ | Reference, compound formula                                                                                                                                                                                                                                                                                                                                                                                                                                     |
|---------------|------------------|-----------------------------------------------------------------------------------------------------------------------------------------------------------------------------------------------------------------------------------------------------------------------------------------------------------------------------------------------------------------------------------------------------------------------------------------------------------------|
| WUNRAZ        | 2.294 Å          | Wang, P.; Ma, J.-P.; Dong, Y.-B. <i>Chem. Eur. J.</i> <b>2009</b> , <i>15</i> , 10432.<br>[(Ho(H <sub>2</sub> O) <sub>8</sub> ][Ho <sub>2</sub> C <sub>64</sub> H <sub>44</sub> N <sub>16</sub> O <sub>18</sub> ]ClO <sub>4</sub> ·H <sub>2</sub> O                                                                                                                                                                                                             |
| SISQUH        | 2.341 Å          | Mainicheva, E. A.; Geras'ko, O. A.; Sheludyakova, L. A.; Naumov, D. Y.; Karsanova, I. I.; Amirov, R. R.; Fedin, V. P. <i>Izv. Akad. Nauk SSSR, Ser. Khim.</i> <b>2006</b> , 1885.<br>[Ho(H <sub>2</sub> O) <sub>8</sub> ] <sub>3</sub> [Ho(H <sub>2</sub> O) <sub>6</sub> (NO <sub>3</sub> ) <sub>2</sub> ][Ho <sub>4</sub> C <sub>84</sub> H <sub>94</sub> N <sub>50</sub> O <sub>38</sub> ] <sub>2</sub> (NO <sub>3</sub> ) <sub>18</sub> ·62H <sub>2</sub> O |
| YEWXAC        | 2.343 Å          | Qu, Y.-X. Zhou, K.-Z.; Chen, K.; Zhang, Y.-Q.; Xiao, X.; Zhou, Q.-D.; Tao, Z.; Ma, P.-H.; Wei, G. <i>Inorg. Chem.</i> <b>2018</b> , <i>57</i> , 7412. [Ho(H <sub>2</sub> O) <sub>8</sub> ](C <sub>54</sub> H <sub>60</sub> N <sub>24</sub> O <sub>12</sub> )[ZnCl <sub>4</sub> ][ZnCl <sub>3</sub> (H <sub>2</sub> O)]·15H <sub>2</sub> O                                                                                                                       |
| IPIGUL        | 2.345 Å          | Yang, B.; Gao, Z.-Z.; Lu, J.-H.; Zhu, Q.-J.; Xue, S.-F.; Tao, Z.; Prior, T. J.; Redshaw, C.; Wei, G.; Xiao, X. <i>CrystEngComm</i> <b>2016</b> , <i>18</i> , 5028. [Ho(H <sub>2</sub> O) <sub>8</sub> ]Cl <sub>3</sub> ·C <sub>44</sub> H <sub>44</sub> N <sub>24</sub> O <sub>12</sub> ·10H <sub>2</sub> O                                                                                                                                                     |
| GAHTER        | 2.351 Å          | Zhao, W.; Wang, C.; Zhang, Y.; Zhang, Y.; Xue, S.; Tao, Z.; Clegg, J. K.; Zhu, Q., Lindoy, L. F.; Wei, G. <i>New J. Chem.</i> <b>2016</b> , <i>40</i> , 2763. [Ho(H <sub>2</sub> O) <sub>8</sub> ](C <sub>42</sub> H <sub>45</sub> N <sub>24</sub> O <sub>18</sub> )·25H <sub>2</sub> O                                                                                                                                                                         |
| BUZEWZ        | 2.353 Å          | Yamada, M.; Kondo, Y.; Hamada, F. <i>Int. J. Soc. Mater. Eng. Resour.</i> <b>2008</b> , <i>15</i> , 50.<br>[Ho(H <sub>2</sub> O) <sub>8</sub> ] <sub>2</sub> (C <sub>36</sub> H <sub>18</sub> O <sub>24</sub> S <sub>12</sub> )·15H <sub>2</sub> O                                                                                                                                                                                                              |
| AWOCUN        | 2.355 Å          | Patra, M.; Dubey, S. K.; Singha, S.; Rizzoli, C.; Bhattacharjee, S.; Saha, R. <i>J. Coord. Chem.</i> <b>2021</b> , <i>74</i> , 1879. [Ho(H <sub>2</sub> O) <sub>8</sub> ]( <i>p</i> -C <sub>6</sub> Br <sub>4</sub> (COO) <sub>2</sub> ) <sub>2</sub> ·2C <sub>10</sub> H <sub>8</sub> N <sub>2</sub>                                                                                                                                                           |
| VEHMON        | 2.355 Å          | Shen, F.-F.; Chen, K.; Hua, Z.-Y.; Wang, Y.; Xu, J.; Chen, M.-D.; Zhang, Y.-Q.; Tao, Z. <i>CrystEngComm</i> <b>2017</b> , <i>19</i> , 5635. [Ho(H <sub>2</sub> O) <sub>8</sub> ]Cl(NO <sub>3</sub> ) <sub>2</sub> ·(C <sub>44</sub> H <sub>52</sub> N <sub>24</sub> O <sub>14</sub> )·10H <sub>2</sub> O                                                                                                                                                        |
| CEQMOD        | 2.355 Å          | Chesnokov, G. A.; Topchiy, M. A.; Asachenko, A. F.; Muravyev, N. V.; Grishin, L. I.; Nikiforova, A. S.; Utochnikova, V. V.; Rybakov, V. B.; Khrustalev, V. N.; Nechaev, M. S. <i>Eur. J. Inorg. Chem.</i> <b>2018</b> , 805.<br>[Ho(H <sub>2</sub> O) <sub>8</sub> ] <sub>2</sub> (C <sub>2</sub> N <sub>8</sub> ) <sub>3</sub> ·4H <sub>2</sub> O                                                                                                              |
| MUQRUM        | 2.356 Å          | Trzesowska-Kruszynska, A.; Kruszynski, R.; Zalewicz, M.; Bartczak, T. J. <i>J. Coord. Chem.</i> <b>2010</b> , <i>63</i> , 1013. [Ho(H <sub>2</sub> O) <sub>8</sub> ](NO <sub>3</sub> ) <sub>3</sub> ·2C <sub>6</sub> H <sub>12</sub> N <sub>4</sub> ·2H <sub>2</sub> O                                                                                                                                                                                          |
| SERRAM        | 2.360 Å          | Bai, Z.; Scheibe, B.; Sperling, J. M.; Albrecht-Schonzart, T. E. <i>Cryst. Growth Des.</i> <b>2022</b> , <i>22</i> , 5504.<br>[Ho(H <sub>2</sub> O) <sub>8</sub> ](C <sub>3</sub> H <sub>5</sub> N <sub>6</sub> ) <sub>3</sub> ·3H <sub>2</sub> O                                                                                                                                                                                                               |

|             |                              |                                                                                                                                                                                                                                                                                                          |
|-------------|------------------------------|----------------------------------------------------------------------------------------------------------------------------------------------------------------------------------------------------------------------------------------------------------------------------------------------------------|
| VUMREB      | 2.362 Å                      | Steinhauser, G.; Giester, CG.; Wagner, C.; Leopold, N.; Sterba, J. H.; Lendl, B.; Bichler, M. <i>Helv. Chim. Acta</i> <b>2009</b> , <i>92</i> , 1371. [Ho(H <sub>2</sub> O) <sub>8</sub> ] <sub>2</sub> (C <sub>2</sub> N <sub>10</sub> ) <sub>3</sub> ·6H <sub>2</sub> O                                |
| 87629       | 2.369 Å                      | Junk, P. C.; Semenova, L. I.; Skelton, B. W.; White, A. <i>Aust. J. Chem.</i> <b>1999</b> , <i>52</i> , 531. [Ho(H <sub>2</sub> O) <sub>8</sub> ]Br <sub>3</sub>                                                                                                                                         |
| JOQWIY      | 2.369 Å                      | Lin, R.-L.; Zhou, J.-J.; Zhou, F. H.; Sun, W.-Q.; Liu, J.-X.; Chen, K. <i>CrystEngComm</i> <b>2019</b> , <i>21</i> , 5641. [(Ho(H <sub>2</sub> O) <sub>8</sub> )[CdCl <sub>4</sub> ]Cl·C <sub>44</sub> H <sub>52</sub> N <sub>24</sub> O <sub>12</sub> ·5H <sub>2</sub> O                                |
| JUHGAW      | 2.375 Å                      | Yu, X.; Clegg, J. K.; Zhang, Y.-Q.; Xue, S.-F.; Tao, Z.; Zhu, Q.-J.; Lindoy, L. F.; Wei, G. <i>Polyhedron</i> <b>2015</b> , <i>91</i> , 150. [Ho(H <sub>2</sub> O) <sub>8</sub> ]Cl(NO <sub>3</sub> ) <sub>2</sub> ·(C <sub>44</sub> H <sub>44</sub> N <sub>24</sub> O <sub>12</sub> )·9H <sub>2</sub> O |
| <b>Mean</b> | <b>2.356 Å/13 structures</b> |                                                                                                                                                                                                                                                                                                          |

*Nine-coordination, tricapped trigonal prism*

ICSD/CSD code  $d(\text{Ho-O})_p + d(\text{Ho-O})_c$  Reference, compound formula

|                 |                                                   |                                                                                                                                                                                                                       |
|-----------------|---------------------------------------------------|-----------------------------------------------------------------------------------------------------------------------------------------------------------------------------------------------------------------------|
| HOESUL02        | 2.362 + 2.511 Å                                   | Gerkin, R. E.; Reppart, W. J. <i>Acta Crystallogr., Sect. C</i> <b>1984</b> , <i>40</i> , 781. [Ho(H <sub>2</sub> O) <sub>9</sub> ](C <sub>2</sub> H <sub>5</sub> SO <sub>4</sub> ) <sub>3</sub>                      |
| 61781           | 2.368 + 2.527 Å                                   | Santos, C. O. P.; Castellano, E. E.; Machado, L. C.; Vicentini, G. <i>Inorg. Chim. Acta</i> <b>1985</b> , <i>110</i> , 83. [Ho(H <sub>2</sub> O) <sub>9</sub> ](CF <sub>3</sub> SO <sub>3</sub> ) <sub>3</sub>        |
| BUVXOF01        | 2.368 + 2.527 Å                                   | Chatterjee, A.; Maslen, E. N.; Watson, K. J. <i>Acta Crystallogr., Sect. B</i> <b>1988</b> , <i>44</i> , 381. [Ho(H <sub>2</sub> O) <sub>6</sub> ](CF <sub>3</sub> SO <sub>3</sub> ) <sub>3</sub>                     |
| 62508           | 2.378 + 2.443 Å                                   | Gerkin, R. E.; Reppart, W. J. <i>Acta Crystallogr., Sect. C</i> <b>1987</b> , <i>43</i> , 623. [Ho(H <sub>2</sub> O) <sub>9</sub> ](BrO <sub>3</sub> ) <sub>3</sub>                                                   |
| 62507           | 2.386 + 2.449 Å                                   | Gerkin, R. E.; Reppart, W. J. <i>Acta Crystallogr., Sect. C</i> <b>1987</b> , <i>43</i> , 623. [Ho(H <sub>2</sub> O) <sub>9</sub> ](BrO <sub>3</sub> ) <sub>3</sub>                                                   |
| HOESUL          | 2.390 + 2.512 Å                                   | Hubbard, C. R.; Quicksall, C. O.; Jacobson, R. A. <i>Acta Crystallogr., Sect. B</i> <b>1974</b> , <i>30</i> , 2613. [Ho(H <sub>2</sub> O) <sub>9</sub> ](C <sub>2</sub> H <sub>5</sub> SO <sub>4</sub> ) <sub>3</sub> |
| 91455           | 2.402 + 2.407 Å                                   | Lim, K. C.; Skelton, B. W.; White, A. H. <i>Aust. J. Chem.</i> <b>2000</b> , <i>53</i> , 867. [Ho(H <sub>2</sub> O) <sub>9</sub> ]I <sub>3</sub>                                                                      |
| <b>Mean</b>     | <b>2.375 + 2.494 Å/6 structures, mean 2.414 Å</b> |                                                                                                                                                                                                                       |
| <b>Mean all</b> | <b>2.414 Å/6 structures</b>                       |                                                                                                                                                                                                                       |

**Table S1w.** Summary of solid state structures containing a hydrated erbium(III) ion. The ICSD/CDS code refers to the code in the Inorganic Crystal Structure Database (ICSD, number) and Cambridge Structure Database (CSD, letters), respectively, and the mean Er-O bond distance,  $d(\text{Er-O})$ ;  $d(\text{Er-O})_p$  denotes ligands forming the prism and  $d(\text{Er-O})_c$  the capping ligands in tricapped trigonal prismatic configuration. Data in purple text are not included in the mean distance as they are uncertain or differ significantly from the mean value.

### Erbium(III)

#### Six-coordination

| ICSD/CSD code | $d(\text{Er-O})$ | Reference, compound formula                                                                                                            |
|---------------|------------------|----------------------------------------------------------------------------------------------------------------------------------------|
| 31758         | 2.154 Å          | Glaser, J.; Johansson, G., <i>Acta Chem. Scand., Ser. A</i> <b>1981</b> , 35, 639. $[\text{Er}(\text{H}_2\text{O})_6](\text{ClO}_4)_3$ |

#### Seven-coordination

| ICSD/CSD code | $d(\text{Er-O})$ | Reference, compound formula                                                                                                                                                                                                                                                                                  |
|---------------|------------------|--------------------------------------------------------------------------------------------------------------------------------------------------------------------------------------------------------------------------------------------------------------------------------------------------------------|
| VOSVIL        | 2.444 Å          | Loh, S. L.; Sobolev, A. N.; Lim, S. H.; Ling, I. <i>CrystEngComm</i> <b>2020</b> , 22, 52. $[\text{Er}(\text{H}_2\text{O})_7][\text{Er}(\text{H}_2\text{O})_7(\text{OC}_4\text{H}_8)](\text{C}_{16}\text{H}_{20}\text{N}_4)(\text{C}_{28}\text{H}_{20}\text{O}_{16}\text{S}_4)_2 \cdot 15\text{H}_2\text{O}$ |

#### Eight-coordination

| ICSD/CSD code | $d(\text{Er-O})$ | Reference, compound formula                                                                                                                                                                                                                                                                                             |
|---------------|------------------|-------------------------------------------------------------------------------------------------------------------------------------------------------------------------------------------------------------------------------------------------------------------------------------------------------------------------|
| BIQPAV        | 2.235 Å          | Smith, J. A.; Singh-Wilmot, M. A.; Carter, K. P.; Cahill, C. L.; Ridenour, J. A. <i>Cryst. Growth Des.</i> <b>2019</b> , 19, 305. $[\text{Er}(\text{H}_2\text{O})_8][\text{Er}_3\text{C}_{48}\text{Br}_{24}\text{O}_{24}] \cdot 6\text{H}_2\text{O}$                                                                    |
| JODBOU        | 2.322 Å          | Chekhlov, A.N. <i>Zh. Neorg. Khim.</i> <b>2007</b> , 52, 1120. $[\text{Er}(\text{H}_2\text{O})_8](\text{C}_{18}\text{H}_{38}\text{N}_2\text{O}_6)\text{Br}_5 \cdot 1.5\text{H}_2\text{O}$                                                                                                                               |
| VEHMUT        | 2.326 Å          | Shen, F.-F.; Chen, K.; Hua, Z.-Y.; Wang, Y.; Xu, J.; Chen, M.-D.; Zhang, Y.-Q.; Tao, Z. <i>CrystEngComm</i> <b>2017</b> , 19, 5635. $[\text{Tm}(\text{H}_2\text{O})_8]\text{Cl}(\text{NO}_3)_2 \cdot (\text{C}_{44}\text{H}_{52}\text{N}_{24}\text{O}_{14}) \cdot 7\text{H}_2\text{O}$                                  |
| MITGOM        | 2.333 Å          | Makha, M.; Alias, Y.; Raston, C. L.; Sobolev, A. <i>New J. Chem.</i> <b>2008</b> , 32, 83. $[\text{Er}(\text{H}_2\text{O})_9]_2(4-(\text{C}_6\text{H}_5)_3\text{PCH}_2\text{C}_6\text{H}_4\text{CH}_2\text{P}(\text{C}_6\text{H}_5)_3)(\text{C}_{28}\text{H}_{10}\text{O}_{16}\text{S}_4)_2 \cdot 22\text{H}_2\text{O}$ |
| BENDUV        | 2.334 Å          | Benslimane, M.; Merazig, H.; Daran, J.-C.; Zeghouan, O. <i>Acta Crystallogr., Sect. E</i> <b>2012</b> , 68, m1388. $[\text{Er}(\text{H}_2\text{O})_9](4-(\text{CH}_3)_2\text{N}-\text{C}_5\text{H}_5\text{N})\text{Cl}_4 \cdot \text{H}_2\text{O}$                                                                      |
| 91458         | 2.336 Å          | Lim, K. C.; Skelton, B. W.; White, A. H. <i>Aust. J. Chem.</i> <b>2000</b> , 53, 867. $[\text{Er}(\text{H}_2\text{O})_8]\text{I}_3$                                                                                                                                                                                     |
| HAYROR        | 2.337 Å          | Falk, F.; Herkert, L.; Hackbarth, L.; Muller-Buschbaum, K.; Finze, M.; Kockerling, M. <i>Z. Anorg. Allg. Chem.</i> <b>2017</b> , 643, 625. $[\text{Er}(\text{H}_2\text{O})_8](\text{B}(\text{CN})_4)_3 \cdot (\text{CH}_3)_2\text{CO}$                                                                                  |
| IPIFEU        | 2.337 Å          | Yang, B.; Gao, Z.-Z.; Lu, J.-H.; Zhu, Q.-J.; Xue, S.-F.; Tao, Z.; Prior, T. J.; Redshaw, C.; Wei, G. Xiao, X. <i>CrystEngComm</i> <b>2016</b> , 18, 5028. $(\text{Er}(\text{H}_2\text{O})_8)\text{Cl}_3 \cdot \text{C}_{40}\text{H}_{44}\text{N}_{24}\text{O}_{12} \cdot 17\text{H}_2\text{O}$                          |

|             |                              |                                                                                                                                                                                                                                                                                                          |
|-------------|------------------------------|----------------------------------------------------------------------------------------------------------------------------------------------------------------------------------------------------------------------------------------------------------------------------------------------------------|
| IXOFEI      | 2.337 Å                      | Cherkasova, E. V.; Peresyphkina, E. V.; Virovets, A. V.; Cherkasova, T. G. <i>Zh. Neorg. Khim.</i> <b>2016</b> , <i>61</i> , 174. $[(\text{Er}(\text{H}_2\text{O})_8)[\text{Cr}(\text{NCS})_6] \cdot 5\text{H}_2\text{O}$                                                                                |
| GAHSUG      | 2.342 Å                      | Zhao, W.; Wang, C.; Zhang, Y.; Zhang, Y.; Xue, S.; Tao, Z.; Clegg, J. K.; Zhu, Q., Lindoy, L. F.; Wei, G. <i>New J. Chem.</i> <b>2016</b> , <i>40</i> , 2763. $[\text{Er}(\text{H}_2\text{O})_8](\text{C}_{42}\text{H}_{45}\text{N}_{24}\text{O}_{18}) \cdot 25\text{H}_2\text{O}$                       |
| MUQSAT      | 2.342 Å                      | Trzesowska-Kruszynska, A.; Kruszynski, R.; Zalewicz, M.; Bartczak, T. J. <i>J. Coord. Chem.</i> <b>2010</b> , <i>63</i> , 1013. $[\text{Er}(\text{H}_2\text{O})_8](\text{NO}_3)_3 \cdot 2\text{C}_6\text{H}_{12}\text{N}_4 \cdot 2\text{H}_2\text{O}$                                                    |
| BUZVUO      | 2.343 Å                      | Yamada, M.; Kondo, Y.; Hamada, F. <i>Int. J. Soc. Mater. Eng. Resour.</i> <b>2008</b> , <i>15</i> , 50. $[\text{Er}(\text{H}_2\text{O})_8]_2(\text{C}_{36}\text{H}_{18}\text{O}_{24}\text{S}_{12}) \cdot 16\text{H}_2\text{O}$                                                                           |
| KIWBAU      | 2.343 Å                      | Zhu, X.; Ma, Z.; Bi, W.; Wang, Y.; Yuan, D.; Cao, R. <i>CrystEngComm</i> <b>2008</b> , <i>10</i> , 19. $[\text{Er}(\text{H}_2\text{O})_8][\text{ErC}_{18}\text{H}_{28}\text{N}_4\text{O}_8]\text{NO}_3 \cdot 10\text{H}_2\text{O}$                                                                       |
| UHERIK      | 2.347 Å                      | Xie, H.; Lu, G. <i>J. Coord. Chem.</i> <b>2015</b> , <i>68</i> , 1800. $[\text{Er}(\text{H}_2\text{O})_8](2,4,6\text{-(HOOC)}_3\text{-}1,3,5\text{-COO})_3\text{C}_6 \cdot 9\text{H}_2\text{O}$                                                                                                          |
| TIXJAO      | 2.349 Å                      | Li, S.; Zhao, Y.; Qi, H.; Zhou, Y.; Liu, S.; Ma, X.; Zhang, J.; Chen, X. <i>Chem. Commun.</i> <b>2019</b> , <i>55</i> , 2525. $[\text{Er}(\text{H}_2\text{O})_8]_2[\text{Er}_4\text{Nb}_6\text{W}_{30}\text{C}_{40}\text{H}_{84}\text{B}_8\text{N}_8\text{O}_{158}\text{P}_4] \cdot 3\text{H}_2\text{O}$ |
| VUMRIF      | 2.349 Å                      | Steinhauser, G.; Giester, G.; Wagner, C.; Leopold, N.; Sterba, J. H.; Lendl, B.; Bichler, M. <i>Helv. Chim. Acta</i> <b>2009</b> , <i>92</i> , 1371. $[\text{Er}(\text{H}_2\text{O})_8]_2(\text{C}_2\text{N}_{10})_3 \cdot 6\text{H}_2\text{O}$                                                          |
| SERROA      | 2.350 Å                      | Bai, Z.; Scheibe, B.; Sperling, J. M.; Albrecht-Schonzart, T. E. <i>Cryst. Growth Des.</i> <b>2022</b> , <i>22</i> , 5504. $[\text{Er}(\text{H}_2\text{O})_8](\text{C}_3\text{H}_5\text{N}_6)_3 \cdot 3\text{H}_2\text{O}$                                                                               |
| QUTRIH      | 2.354 Å                      | Liu, L.; Li, F.; Xu, L.; Liu, X.; Gao, G. <i>J. Solid State Chem.</i> <b>2010</b> , <i>183</i> , 350. $((\text{CH}_3)_4\text{N})_8[\text{Er}(\text{H}_2\text{O})_8]_2[\text{H}_8\text{Er}_2\text{As}_4\text{W}_{34}\text{O}_{126}] \cdot 25\text{H}_2\text{O}$                                           |
| JUHGEA      | 2.355 Å                      | Yu, X.; Clegg, J. K.; Zhang, Y.-Q.; Xue, S.-F.; Tao, Z.; Zhu, Q.-J.; Lindoy, L. F.; Wei, G. <i>Polyhedron</i> <b>2015</b> , <i>91</i> , 150. $[\text{Er}(\text{H}_2\text{O})_8]\text{Cl}(\text{NO}_3)_2 \cdot (\text{C}_{44}\text{H}_{44}\text{N}_{24}\text{O}_{12}) \cdot 8.5\text{H}_2\text{O}$        |
| YICCIW      | 2.363 Å                      | Rogers, R. D.; Rollins, A. N. <i>J. Chem. Cryst.</i> <b>1994</b> , <i>24</i> , 531. $[\text{Er}(\text{H}_2\text{O})_8]\text{Cl}_3 \cdot \text{C}_{10}\text{H}_{20}\text{O}_5$                                                                                                                            |
| WUNRED      | 2.370 Å                      | Wang, P.; Ma, J.-P.; Dong, Y.-B. <i>Chem. Eur. J.</i> <b>2009</b> , <i>15</i> , 10432. $[\text{Er}(\text{H}_2\text{O})_8][\text{Er}_2\text{C}_{64}\text{H}_{44}\text{N}_{16}\text{O}_{18}]\text{ClO}_4 \cdot \text{H}_2\text{O}$                                                                         |
| KIZGIK      | 2.385 Å                      | Eulgem, P.J.; Klein, A.; Maggiorosa, N.; Naumann, D.; Pohl, R. W. H. <i>Chem. Eur. J.</i> <b>2008</b> , <i>14</i> , 3727. $[\text{Er}(\text{H}_2\text{O})_8]_4(5,5\text{'-bitetrazole})_3 \cdot 2\text{H}_2\text{O}$                                                                                     |
| UMOKEP      | 2.416 Å                      | Tan, Y.-H. CCDC deposition number 941826, <b>2021</b> . $[\text{Er}(\text{H}_2\text{O})_8](\text{C}_6\text{H}_4\text{N}_5)_3 \cdot 2\text{C}_6\text{H}_5\text{H}_5 \cdot 7\text{H}_2\text{O}$                                                                                                            |
| <b>Mean</b> | <b>2.345 Å/20 structures</b> |                                                                                                                                                                                                                                                                                                          |

*Nine-coordination, tricapped trigonal prism*

ICSD/CSD code  $d(\text{Er-O})_p + d(\text{Er-O})_c$  Reference, compound formula

GELBEG 2.285 + 2.211 Å Antonenko, T. A.; Alikberova, L. Y.; Albov, D. V.; Rukk, N. S. *Zh. Strukt. Khim.* **2013**, *54*, 141.  $[\text{Er}(\text{H}_2\text{O})_9]\text{I}_3 \cdot 2\text{CS}(\text{NH}_2)_2$



|             |                                     |                                                                                                                                                                                                                                        |
|-------------|-------------------------------------|----------------------------------------------------------------------------------------------------------------------------------------------------------------------------------------------------------------------------------------|
| AERETS      | 2.362 + 2.524 Å                     | Fitzwater, D. R.; Rundle, R. E. <i>Z. Kristallogr., Kristallogeom., Kristallophys., Kristallochem.</i> <b>1959</b> , 112, 363. [Er(H <sub>2</sub> O) <sub>9</sub> ](C <sub>2</sub> H <sub>5</sub> SO <sub>4</sub> ) <sub>3</sub>       |
| AERETS02    | 2.352 + 2.503 Å                     | Gerkin, R. E.; Reppart, W. J. <i>Acta Crystallogr., Sect. C</i> <b>1984</b> , 40, 781. [Er(H <sub>2</sub> O) <sub>9</sub> ](C <sub>2</sub> H <sub>5</sub> SO <sub>4</sub> ) <sub>3</sub>                                               |
| RAPYIR      | 2.339 + 2.518 Å                     | Sandström, M.; Lindqvist-Reis, P.; Eriksson, L.; Sandström, D.; Lidin, S.; Persson, I.; Sandström, M. <i>Chem. Eur. J.</i> <b>2005</b> , 11, 4065. [Er(H <sub>2</sub> O) <sub>9</sub> ](CF <sub>3</sub> SO <sub>3</sub> ) <sub>3</sub> |
| <b>Mean</b> | <b>2.351 + 2.515 Å/3 structures</b> | <b>(mean 2.406 Å)</b>                                                                                                                                                                                                                  |

**Table S1x.** Summary of solid state structures containing a hydrated thulium(III) ion. The ICSD/CDS code refers to the code in the Inorganic Crystal Structure Database (ICSD, number) and Cambridge Structure Database (CSD, letters), respectively, and the mean Tm-O bond distance,  $d(\text{Tm-O})$ ;  $d(\text{Tm-O})_p$  denotes ligands forming the prism and  $d(\text{Tm-O})_c$  the capping ligands in tricapped trigonal prismatic configuration. Data in purple text are not included in the mean distance as they are uncertain or differ significantly from the mean value.

### Thulium(III)

#### Eight-coordination

| ICSD/CSD code | $d(\text{Tm-O})$ | Reference, compound formula                                                                                                                                                                                                                                                                                                        |
|---------------|------------------|------------------------------------------------------------------------------------------------------------------------------------------------------------------------------------------------------------------------------------------------------------------------------------------------------------------------------------|
| VEHNAA        | 2.322 Å          | Shen, F.-F.; Chen, K.; Hua, Z.-Y.; Wang, Y.; Xu, J.; Chen, M.-D.; Zhang, Y.-Q.; Tao, Z. <i>CrystEngComm</i> <b>2017</b> , <i>19</i> , 5635. $[\text{Tm}(\text{H}_2\text{O})_8]\text{Cl}_3 \cdot (\text{C}_{44}\text{H}_{52}\text{N}_{24}\text{O}_{14}) \cdot 19\text{H}_2\text{O}$                                                 |
| HIDDOP        | 2.332 Å          | Yamada, M.; Hamada, F. <i>CrystEngComm</i> <b>2013</b> , <i>15</i> , 5703. $[\text{Tm}(\text{H}_2\text{O})_8]_2(\text{C}_{36}\text{H}_{18}\text{O}_{24}\text{S}_{12}) \cdot 16\text{H}_2\text{O}$                                                                                                                                  |
| MUQSIB        | 2.332 Å          | Trzesowska-Kruszynska, A.; Kruszynski, R.; Zalewicz, M.; Bartzak, T. J. <i>J. Coord. Chem.</i> <b>2010</b> , <i>63</i> , 1013. $[\text{Tm}(\text{H}_2\text{O})_8](\text{NO}_3)_3 \cdot 2(\text{C}_6\text{H}_{12}\text{N}_4) \cdot 2\text{H}_2\text{O}$                                                                             |
| CEQMUI        | 2.333 Å          | Chesnokov, G. A.; Topchiy, M. A.; Asachenko, A. F.; Muravyev, N. V.; Grishin, L. I.; Nikiforova, A. S.; Utochnikova, V. V.; Rybakov, V. B.; Khrustalev, V. N.; Nechaev, M. S. <i>Eur. J. Inorg. Chem.</i> <b>2018</b> , 805. $[\text{Tm}(\text{H}_2\text{O})_8]_2(\text{C}_2\text{N}_8)_3 \cdot 3\text{H}_2\text{O}$               |
| GAHTUH        | 2.334 Å          | Zhao, W.; Wang, C.; Zhang, Y.; Zhang, Y.; Xue, S.; Tao, Z.; Clegg, J. K.; Zhu, Q.; Lindoy, L. F.; Wei, G. <i>New. J. Chem.</i> <b>2016</b> , <i>40</i> , 2763. $[\text{Tm}(\text{H}_2\text{O})_8](\text{C}_{10}\text{H}_9\text{N}_2)(\text{CCl}_3\text{COO})_4 \cdot 2\text{C}_{10}\text{H}_8\text{N}_2 \cdot 2\text{H}_2\text{O}$ |
| NERJEB        | 2.334 Å          | Czylkowska, A.; Kruszynski, R.; Kaczmarek, A.; Markiewicz, M. <i>Zh. Strukt. Khim.</i> <b>2012</b> , <i>53</i> , 946. $[\text{Tm}(\text{H}_2\text{O})_8](\text{C}_{10}\text{H}_9\text{N}_2)(\text{C}_{42}\text{H}_{45}\text{N}_{24}\text{O}_{18}) \cdot 27\text{H}_2\text{O}$                                                      |
| VUMROL        | 2.339 Å          | Steinhauser, G.; Giester, G.; Wagner, C.; Leopold, N.; Sterba, J. H.; Lendl, B.; Bichler, M. <i>Helv. Chim. Acta</i> <b>2009</b> , <i>92</i> , 1371. $[\text{Tm}(\text{H}_2\text{O})_8]_2(\text{C}_2\text{N}_{10})_3 \cdot 6\text{H}_2\text{O}$                                                                                    |
| SERSER        | 2.340 Å          | Bai, Z.; Scheibe, B.; Sperling, J. M.; Albrecht-Schonzart, T. E. <i>Cryst. Growth Des.</i> <b>2022</b> , <i>22</i> , 5504. $[\text{Tm}(\text{H}_2\text{O})_8](\text{C}_3\text{H}_5\text{N}_6)_3 \cdot 3\text{H}_2\text{O}$                                                                                                         |
| IPIHEW        | 2.345 Å          | Yang, B.; Gao, Z.-Z.; Lu, J.-H.; Zhu, Q.-J.; Xue, S.-F.; Tao, Z.; Prior, T. J.; Redshaw, C.; Wei, G.; Xiao, X. <i>CrystEngComm</i> <b>2016</b> , <i>18</i> , 5028. $[\text{Tm}(\text{H}_2\text{O})_8]\text{Cl}_3 \cdot (\text{C}_{40}\text{H}_{44}\text{N}_{24}\text{O}_{12}) \cdot 11\text{H}_2\text{O}$                          |
| JUHGIE        | 2.354 Å          | Yu, X.; Clegg, J. K.; Zhang, Y.-Q.; Xue, S.-F.; Tao, Z.; Zhu, Q.-J.; Lindoy, L. F.; Wei, G. <i>Polyhedron</i> <b>2015</b> , <i>91</i> , 150. $[\text{Tm}(\text{H}_2\text{O})_8]\text{Cl}_3 \cdot \text{C}_{40}\text{H}_{44}\text{N}_{24}\text{O}_{12} \cdot 11\text{H}_2\text{O}$                                                  |
| WUNRIH        | 2.363 Å          | Wang, P.; Ma, J.-P.; Dong, Y.-B. <i>Chem. Eur. J.</i> <b>2009</b> , <i>15</i> , 10432. $[\text{Tm}(\text{H}_2\text{O})_8][\text{Tm}_2\text{C}_{64}\text{H}_{44}\text{N}_{16}\text{O}_{18}]\text{ClO}_4 \cdot \text{H}_2\text{O}$                                                                                                   |
| XUCZEC        | 2.373 Å          | Wang, C.-Z.; Zhao, W.-X.; Zhang, Y.-Q.; Xue, S.-F.; Tao, Z.; Zhu, Q.-J.; <i>ChemPlusChem</i> <b>2015</b> , <i>80</i> , 1052. $[\text{Er}(\text{H}_2\text{O})_8]\text{Cl}_3 \cdot (\text{C}_{42}\text{H}_{48}\text{N}_{24}\text{O}_{12}) \cdot 14\text{H}_2\text{O}$                                                                |

BIQPEZ 2.400 Å Smith, J. A.; Singh-Wilmot, M. A.; Carter, K. P.; Cahill, C. L.; Ridenour, J. A. *Cryst. Growth Des.* **2019**, *19*, 305. [Tm(H<sub>2</sub>O)<sub>8</sub>][Tm<sub>3</sub>C<sub>48</sub>Br<sub>24</sub>O<sub>24</sub>]<sub>6</sub>H<sub>2</sub>O

**Mean 2.339 Å/11 structures**

*Nine-coordination, tricapped trigonal prism*

ICSD/CSD code  $d(\text{Tm-O})_p + d(\text{Tm-O})_c$  Reference, compound formula

ZZZARJ01 2.340 + 2.504 Å Gerkin, R. E.; Reppart, W. J. *Acta Crystallogr., Sect. C* **1984**, *40*, 781. [Tm(H<sub>2</sub>O)<sub>9</sub>](C<sub>2</sub>H<sub>5</sub>OSO<sub>3</sub>)<sub>3</sub>

RAPYEN 2.322 + 2.522 Å Sandström, M.; Lindqvist-Reis, P.; Eriksson, L.; Sandström, D.; Lidin, S.; Persson, I.; Sandström, M. *Chem. Eur. J.* **2005**, *11*, 4065. [Tm(H<sub>2</sub>O)<sub>9</sub>](CF<sub>3</sub>SO<sub>3</sub>)<sub>3</sub>

**Mean 2.331 + 2.513 Å/2 structures, mean 2.391 Å**

**Table S1y.** Summary of solid state structures containing a hydrated ytterbium(III) ion. The ICSD/CDS code refers to the code in the Inorganic Crystal Structure Database (ICSD, number) and Cambridge Structure Database (CSD, letters), respectively, and the mean Yb-O bond distance,  $d(\text{Yb-O})$ ;  $d(\text{Yb-O})_p$  denotes ligands forming the prism and  $d(\text{Yb-O})_c$  the capping ligands in tricapped trigonal prismatic configuration. Data in purple text are not included in the mean distance as they are uncertain or differ significantly from the mean value.

### Ytterbium(III)

#### Seven-coordination

MITGIG 2.327 Å Makha, M.; Alias, Y.; Raston, C. L.; Sobolev, A. N. *New. J. Chem.* **2008**, 32, 83.  
 $[\text{Yb}(\text{H}_2\text{O})_7]_{2.33}(\text{C}_{44}\text{H}_{38}\text{P}_2)_7(\text{C}_{28}\text{H}_{20}\text{O}_{16}\text{S}_4)_3(\text{C}_{28}\text{H}_{21}\text{O}_{16}\text{S}_4)_3 \cdot 36.69\text{H}_2\text{O}$

#### Eight-coordination

| ICSD/CSD code | $d(\text{Yb-O})$ | Reference, compound formula                                                                                                                                                                                                                                                                                                                                 |
|---------------|------------------|-------------------------------------------------------------------------------------------------------------------------------------------------------------------------------------------------------------------------------------------------------------------------------------------------------------------------------------------------------------|
| BIQPOJ        | 2.240 Å          | Smith, J. A.; Singh-Wilmot, M. A.; Carter, K. P.; Cahill, C. L.; Ridenour, J. A. <i>Cryst. Growth Des.</i> <b>2019</b> , 19, 305. $[\text{Yb}(\text{H}_2\text{O})_8][\text{Yb}_3\text{C}_{48}\text{Br}_{24}\text{O}_{24}] \cdot 6\text{H}_2\text{O}$                                                                                                        |
| WUNRON        | 2.274 Å          | Wang, P.; Ma, J.-P.; Dong, Y.-B. <i>Chem. Eur. J.</i> <b>2009</b> , 15, 10432.<br>$[\text{Yb}(\text{H}_2\text{O})_8][\text{Yb}_2\text{C}_{64}\text{H}_{44}\text{N}_{16}\text{O}_{18}]\text{ClO}_4 \cdot \text{H}_2\text{O}$                                                                                                                                 |
| GAHVAP        | 2.296 Å          | Zhao, W.; Wang, C.; Zhang, Y.; Zhang, Y.; Xue, S.; Tao, Z.; Clegg, J. K.; Zhu, Q.; Lindoy, L. F.; Wei, G. <i>New. J. Chem.</i> <b>2016</b> , 40, 2763. $[\text{Yb}(\text{H}_2\text{O})_8](\text{C}_{42}\text{H}_{45}\text{N}_{24}\text{O}_{18}) \cdot 25\text{H}_2\text{O}$                                                                                 |
| AHIRUF        | 2.310 Å          | Thuery, P. <i>Inorg. Chem.</i> <b>2009</b> , 48, 4497. $[\text{Yb}(\text{H}_2\text{O})_8](\text{ReO}_4)_3 \cdot (\text{C}_{36}\text{H}_{36}\text{N}_{24}\text{O}_{12}) \cdot 6\text{H}_2\text{O}$                                                                                                                                                           |
| 281540        | 2.312 Å          | Yahyaoui, S.; Ben Hassen, R.; Donnadiou, B.; Daran, J. C.; Ben Salah, A. <i>Acta Crystallogr., Sect. C</i> <b>2003</b> , 59, i109. $[\text{Yb}(\text{H}_2\text{O})_8][\text{Cd}_3\text{Cl}_9(\text{H}_2\text{O})] \cdot 6\text{H}_2\text{O}$                                                                                                                |
| BAQHAE        | 2.313 Å          | Komori-Orisaku, K.; Yamashita, S.; Isozaki, T.; Sugiura, K.; Koide, Y. <i>Chem. Eur. J.</i> <b>2011</b> , 17, 13424.<br>$[\text{Yb}(\text{H}_2\text{O})_8]_2(\text{CF}_3\text{SO}_3)_6 \cdot 15\text{C}_{12}\text{H}_{10}\text{N}_2 \cdot 18\text{H}_2\text{O}$                                                                                             |
| GURCAA        | 2.317 Å          | Ling, I.; Makha, M.; Sobolev, A. N.; Alias, Y.; Raston, C. L. <i>Aust. J. Chem.</i> <b>2020</b> , 73, 570.<br>$[\text{Yb}(\text{H}_2\text{O})_8](\text{NaC}_{30}\text{H}_{29}\text{NO}_{19}\text{S}_4) \cdot 6\text{H}_2\text{O}$                                                                                                                           |
| AHISAM        | 2.318 Å          | Thuery, P. <i>Inorg. Chem.</i> <b>2009</b> , 48, 4497. $[\text{Yb}(\text{H}_2\text{O})_8][\text{YbReC}_{36}\text{H}_{44}\text{N}_{24}\text{O}_{20}]_2(\text{ReO}_4)_4(\text{NO}_3)_3 \cdot 2\text{H}_2\text{O}$                                                                                                                                             |
| HOSFUQ        | 2.319 Å          | Waller, F. J.; Barrett, A. G. M.; Braddock, D. C.; Ramprasas, D.; McKinnell, R. M.; White, A. J. P.; Williams, D. J.; Ducray, R. <i>J. Org. Chem.</i> <b>1999</b> , 64, 2910. $[\text{Yb}(\text{H}_2\text{O})_8](\text{C}(\text{O}_2\text{SCF}_3)_3)_3 \cdot \text{H}_2\text{O}$                                                                            |
| AHISIU        | 2.321 Å          | Thuery, P. <i>Inorg. Chem.</i> <b>2009</b> , 48, 4497.<br>$[\text{Yb}(\text{H}_2\text{O})_8][\text{YbC}_{84}\text{H}_{92}\text{N}_{56}\text{O}_{32}][\text{YbReC}_{42}\text{H}_{48}\text{N}_{28}\text{O}_{21}][\text{YbReH}_{10}\text{NO}_{12}]_2(\text{ReO}_4)_{10} \cdot \text{C}_{42}\text{H}_{42}\text{N}_{28}\text{O}_{14} \cdot 21\text{H}_2\text{O}$ |
| GURCEE        | 2.321 Å          | Ling, I.; Makha, M.; Sobolev, A. N.; Alias, Y.; Raston, C. L. <i>Aust. J. Chem.</i> <b>2020</b> , 73, 570.<br>$[\text{Yb}(\text{H}_2\text{O})_8]_2(\text{C}_{42}\text{H}_{30}\text{O}_{24}\text{S}_6) \cdot 14\text{H}_2\text{O}$                                                                                                                           |

|        |         |                                                                                                                                                                                                                                                                                                                                                  |
|--------|---------|--------------------------------------------------------------------------------------------------------------------------------------------------------------------------------------------------------------------------------------------------------------------------------------------------------------------------------------------------|
| PIFQAX | 2.322 Å | Makha, M.; Alias, Y.; Raston, C. L.; Sobolev, A. N. <i>New. J. Chem.</i> <b>2007</b> , <i>31</i> , 662. [Yb(H <sub>2</sub> O) <sub>8</sub> ][(C <sub>6</sub> H <sub>5</sub> ) <sub>4</sub> P) <sub>2</sub> (C <sub>28</sub> H <sub>19</sub> O <sub>16</sub> S <sub>4</sub> )·20H <sub>2</sub> O                                                  |
| PIFQOL | 2.324 Å | Makha, M.; Alias, Y.; Raston, C. L.; Sobolev, A. N. <i>New. J. Chem.</i> <b>2007</b> , <i>31</i> , 662. [Yb(H <sub>2</sub> O) <sub>8</sub> ][(C <sub>6</sub> H <sub>5</sub> ) <sub>3</sub> (CH <sub>2</sub> C <sub>6</sub> H <sub>5</sub> )P) <sub>2</sub> (C <sub>28</sub> H <sub>20</sub> O <sub>16</sub> S <sub>4</sub> )·9.5H <sub>2</sub> O |
| YAVJEL | 2.324 Å | Shi, W.; Chen, X.-Y.; Zhao, Y.-N.; Zhao, B.; Cheng, P.; Yu, A.; Song, H.-B.; Wang, H.-G.; Liao, D.-Z.; Yan, S.-P.; Jiang, Z.-H. <i>Chem. Eur. J.</i> <b>2005</b> , <i>11</i> , 5031. [Yb(H <sub>2</sub> O) <sub>8</sub> ] <sub>2</sub> [(VO) <sub>2</sub> -(TTHA)] <sub>3</sub> ·21 H <sub>2</sub> O                                             |
| SERSAN | 2.326 Å | Bai, Z.; Scheibe, B.; Sperling, J. M.; Albrecht-Schonzart, T. E. <i>Cryst. Growth Des.</i> <b>2022</b> , <i>22</i> , 5504. [Dy(H <sub>2</sub> O) <sub>8</sub> ](C <sub>3</sub> H <sub>5</sub> N <sub>6</sub> ) <sub>3</sub> ·3H <sub>2</sub> O                                                                                                   |
| IDIYEA | 2.328 Å | Rohde, A.; Urland, W. <i>Acta Crystallogr. Sect. E.</i> <b>2006</b> , <i>62</i> , m1210. [Yb(H <sub>2</sub> O) <sub>8</sub> ][C <sub>6</sub> H <sub>3</sub> (COOH)(OH)(SO <sub>3</sub> )] <sub>3</sub> ·H <sub>2</sub> O                                                                                                                         |
| MONMUZ | 2.329 Å | Tan, Y.-H.; Xiong, J.-B.; Huang, J.; Gao, J.-X.; Xu, Q.; Yu, Y.-M.; Wang, Y.; Yang, B.; Shu, Q.; Tang, Y.-Z. <i>Chin. J. Inorg. Chem.</i> <b>2014</b> , <i>30</i> , 1621. [Yb(H <sub>2</sub> O) <sub>8</sub> ](C <sub>6</sub> H <sub>4</sub> N <sub>5</sub> ) <sub>3</sub> ·6H <sub>2</sub> O                                                    |
| YURFAT | 2.329 Å | Trzesowska-Kruszynska, A.; Kruszynski, R.; Zalewicz, M.; Bartczak, T. J. <i>J. Coord. Chem.</i> <b>2010</b> , <i>63</i> , 1013. [Yb(H <sub>2</sub> O) <sub>8</sub> ](NO <sub>3</sub> ) <sub>3</sub> ·2(C <sub>6</sub> H <sub>12</sub> N <sub>4</sub> )·2H <sub>2</sub> O                                                                         |
| MEFMIU | 2.330 Å | Cunha-Silva, L.; Westcott, A.; Whitford, N.; Hardie, M. J. <i>Cryst. Growth Des.</i> , <b>2006</b> , <i>6</i> , 726. [Yb(H <sub>2</sub> O) <sub>8</sub> ] <sub>2</sub> (bpy) <sub>5</sub> Cl <sub>6</sub> ·13H <sub>2</sub> O                                                                                                                    |
| VEHNEE | 2.330 Å | Shen, F.-F.; Chen, K.; Hua, Z.-Y.; Wang, Y.; Xu, J.; Chen, M.-D.; Zhang, Y.-Q.; Tao, Z. <i>CrystEngComm</i> <b>2017</b> , <i>19</i> , 5635. [Yb(H <sub>2</sub> O) <sub>8</sub> ] Cl <sub>3</sub> ·(C <sub>44</sub> H <sub>52</sub> N <sub>24</sub> O <sub>14</sub> )·19H <sub>2</sub> O                                                          |
| VUMRUR | 2.330 Å | Steinhauser, G.; Giester, G.; Wagner, C.; Leopold, N.; Sterba, J. H.; Lendl, B.; Bichler, M. <i>Helv. Chim. Acta</i> <b>2009</b> , <i>92</i> , 1371. [Yb(H <sub>2</sub> O) <sub>8</sub> ] <sub>2</sub> (C <sub>2</sub> N <sub>10</sub> ) <sub>3</sub> ·6H <sub>2</sub> O                                                                         |
| HIDDIJ | 2.331 Å | Yamada, M.; Hamada, F. <i>CrystEngComm</i> <b>2013</b> , <i>15</i> , 5703. [Yb(H <sub>2</sub> O) <sub>8</sub> ] <sub>2</sub> (C <sub>36</sub> H <sub>18</sub> O <sub>24</sub> S <sub>12</sub> )·16H <sub>2</sub> O                                                                                                                               |
| MEFMOA | 2.331 Å | Cunha-Silva, L.; Westcott, A.; Whitford, N.; Hardie, M. J. <i>Cryst. Growth Des.</i> <b>2006</b> , <i>6</i> , 726. [Yb(H <sub>2</sub> O) <sub>8</sub> ] <sub>8</sub> (bpy) <sub>19</sub> Cl <sub>24</sub> ·49H <sub>2</sub> O                                                                                                                    |
| MONMOT | 2.331 Å | Tan, Y.-H.; Xiong, J.-B.; Huang, J.; Gao, J.-X.; Xu, Q.; Yu, Y.-M.; Wang, Y.; Yang, B.; Shu, Q.; Tang, Y.-Z. <i>Chin. J. Inorg. Chem.</i> <b>2014</b> , <i>30</i> , 1621. [Yb(H <sub>2</sub> O) <sub>8</sub> ](C <sub>6</sub> H <sub>4</sub> N <sub>5</sub> ) <sub>3</sub> ·2C <sub>6</sub> H <sub>5</sub> N <sub>5</sub> ·7H <sub>2</sub> O     |
| WUNRUT | 2.332 Å | Wang, P.; Ma, J.-P.; Dong, Y.-B. <i>Chem. Eur. J.</i> <b>2009</b> , <i>15</i> , 10432. [Yb(H <sub>2</sub> O) <sub>8</sub> ][Yb <sub>2</sub> C <sub>64</sub> H <sub>50</sub> N <sub>16</sub> O <sub>21</sub> ]ClO <sub>4</sub> ·H <sub>2</sub> O                                                                                                  |
| IPIGOF | 2.333 Å | Yang, B.; Gao, Z.-Z.; Lu, J.-H.; Zhu, Q.-J.; Xue, S.-F.; Tao, Z.; Prior, T. J.; Redshaw, C.; Wei, G.; Xiao, X. <i>CrystEngComm</i> <b>2016</b> , <i>18</i> , 5028. [Yb(H <sub>2</sub> O) <sub>8</sub> ]Cl <sub>3</sub> ·(C <sub>40</sub> H <sub>44</sub> N <sub>24</sub> O <sub>12</sub> )·11H <sub>2</sub> O                                    |
| UHESOR | 2.333 Å | Xie, H.; Lu, G. <i>J. Coord. Chem.</i> <b>2015</b> , <i>68</i> , 1800. [Yb(H <sub>2</sub> O) <sub>8</sub> ](C <sub>6</sub> (COOH) <sub>3</sub> (COO) <sub>3</sub> )·9H <sub>2</sub> O                                                                                                                                                            |
| RANGET | 2.337 Å | Makha, M.; Raston, C.L.; Sobolev, A.N.; White, A.H. <i>Chem. Commun.</i> <b>2005</b> , 1962. [Yb(H <sub>2</sub> O) <sub>8</sub> ](C <sub>42</sub> H <sub>29</sub> O <sub>24</sub> S <sub>6</sub> ) <sub>2</sub> (C <sub>24</sub> H <sub>20</sub> P) <sub>8</sub>                                                                                 |

|             |                              |                                                                                                                                                                                                                                                                                                                                                 |
|-------------|------------------------------|-------------------------------------------------------------------------------------------------------------------------------------------------------------------------------------------------------------------------------------------------------------------------------------------------------------------------------------------------|
| JUHGOK      | 2.341 Å                      | Yu, X.; Clegg, J. K.; Zhang, Y.-Q.; Xue, S.-F.; Tao, Z.; Zhu, Q.-J.; Lindoy, L. F.; Wei, G. <i>Polyhedron</i> <b>2015</b> , <i>91</i> , 150. [Yb(H <sub>2</sub> O) <sub>8</sub> ]Cl(NO <sub>3</sub> ) <sub>2</sub> ·C <sub>40</sub> H <sub>44</sub> N <sub>24</sub> O <sub>12</sub> ·9H <sub>2</sub> O                                          |
| PUJCIG      | 2.346 Å                      | Hassaballa, H.; Steed, J. W.; Junk, P. C.; Elsegood, M. J. R. <i>Inorg. Chem.</i> <b>1998</b> , <i>37</i> , 4666. [Yb(H <sub>2</sub> O) <sub>8</sub> ]Cl <sub>3</sub> ·C <sub>10</sub> H <sub>20</sub> O <sub>5</sub>                                                                                                                           |
| BAQHAE      | 2.347 Å                      | Komori-Orisaku, K.; Yamashita, S.; Isozaki, T.; Sugiura, K.; Koide, Y. <i>Chem. Eur. J.</i> <b>2011</b> , <i>17</i> , 13424. [Yb(H <sub>2</sub> O) <sub>8</sub> ] <sub>2</sub> (CF <sub>3</sub> SO <sub>3</sub> ) <sub>6</sub> ·15C <sub>12</sub> H <sub>10</sub> N <sub>2</sub> ·19H <sub>2</sub> O                                            |
| CEQNAQ      | 2.366 Å                      | Chesnokov, G. A.; Topchiy, M. A.; Asachenko, A. F.; Muravyev, N. V.; Grishin, L. I.; Nikiforova, A. S.; Utochnikova, V. V.; Rybakov, V. B.; Khrustalev, V. N.; Nechaev, M. S. <i>Eur. J. Inorg. Chem.</i> <b>2018</b> , 805. [Yb(H <sub>2</sub> O) <sub>8</sub> ] <sub>2</sub> (C <sub>2</sub> N <sub>8</sub> ) <sub>3</sub> ·3H <sub>2</sub> O |
| <b>Mean</b> | <b>2.326 Å/29 structures</b> |                                                                                                                                                                                                                                                                                                                                                 |

#### Nine-coordination

ICSD/CSD code  $d(\text{Yb-O})_p + d(\text{Tb-O})_c$  Reference, compound formula

|             |                                                   |                                                                                                                                                                                                                                                |
|-------------|---------------------------------------------------|------------------------------------------------------------------------------------------------------------------------------------------------------------------------------------------------------------------------------------------------|
| BUVYEW01    | 2.302 + 2.532 Å                                   | Chatterjee, A.; Maslen, E. N.; Watson, K. J. <i>Acta Crystallogr., Sect. B</i> <b>1988</b> , <i>44</i> , 381. [Yb(H <sub>2</sub> O) <sub>6</sub> ](CF <sub>3</sub> SO <sub>3</sub> ) <sub>3</sub> .                                            |
| RAPYAJ      | 2.304 + 2.523 Å                                   | Sandström, M.; Lindqvist-Reis, P.; Eriksson, L.; Sandström, D.; Lidin, S.; Persson, I.; Sandström, M. <i>Chem. Eur. J.</i> <b>2005</b> , <i>11</i> , 4065. [Yb(H <sub>2</sub> O) <sub>9</sub> ](CF <sub>3</sub> SO <sub>3</sub> ) <sub>3</sub> |
| 28148       | 2.321 + 2.431 Å                                   | Albertsson, J.; Elding, I. <i>Acta Crystallogr., Sect. B</i> <b>1977</b> , <i>33</i> , 1460. [Yb(H <sub>2</sub> O) <sub>9</sub> ](BrO <sub>3</sub> ) <sub>3</sub>                                                                              |
| ESULYB      | 2.321 + 2.518 Å                                   | Albertsson, J.; Elding, I. <i>Acta Crystallogr., Sect. C</i> <b>1977</b> , <i>33</i> , 1460. [Yb(H <sub>2</sub> O) <sub>9</sub> ](C <sub>2</sub> H <sub>5</sub> SO <sub>4</sub> ) <sub>3</sub>                                                 |
| ESULYB01    | 2.324 + 2.503 Å                                   | Gerkin, R. E.; Reppart, W. J. <i>Acta Crystallogr., Sect. C</i> <b>1984</b> , <i>40</i> , 781. [Yb(H <sub>2</sub> O) <sub>9</sub> ](C <sub>2</sub> H <sub>5</sub> SO <sub>4</sub> ) <sub>3</sub>                                               |
| <b>Mean</b> | <b>2.314 + 2.501 Å/5 structures, mean 2.376 Å</b> |                                                                                                                                                                                                                                                |

ICSD/CSD code  $d(\text{Yb-O})$  Reference, compound formula

|             |                                                    |                                                                                                                                                                                                                                                                                                                                                                                                  |
|-------------|----------------------------------------------------|--------------------------------------------------------------------------------------------------------------------------------------------------------------------------------------------------------------------------------------------------------------------------------------------------------------------------------------------------------------------------------------------------|
| PEJNUO      | 2.419 Å                                            | Smith, C. B.; Barbour, L. J.; Makha, M.; Raston, C. L.; Sobolev, A. N. <i>New J. Chem.</i> <b>2006</b> , <i>30</i> , 991. (H <sub>3</sub> O) <sub>9</sub> Na <sub>3</sub> [Yb(H <sub>2</sub> O) <sub>9</sub> ][Co(C <sub>12</sub> H <sub>8</sub> N <sub>2</sub> ) <sub>3</sub> ] <sub>3</sub> (C <sub>56</sub> H <sub>40</sub> O <sub>32</sub> S <sub>8</sub> ) <sub>3</sub> ·21H <sub>2</sub> O |
| GIKFIR      | 2.518 + 2.296 Å                                    | Antonenko, T. A.; Alikberova, L. Y.; Albov, D. V.; Rukk, N. S. <i>Zh. Strukt. Khim.</i> <b>2013</b> , <i>54</i> , 141. [Yb(H <sub>2</sub> O) <sub>9</sub> ] <sub>3</sub> ·2CS(NH <sub>2</sub> ) <sub>2</sub>                                                                                                                                                                                     |
| <b>Mean</b> | <b>2.314 + 2.501 Å/5 structures (mean 2.376 Å)</b> |                                                                                                                                                                                                                                                                                                                                                                                                  |

**Table S1z.** Summary of solid state structures containing a hydrated lutetium(III) ion. The ICSD/CDS code refers to the code in the Inorganic Crystal Structure Database (ICSD, number) and Cambridge Structure Database (CSD, letters), respectively, and the mean Lu-O bond distance,  $d(\text{Lu-O})$ ;  $d(\text{Lu-O})_p$  denotes ligands forming the prism and  $d(\text{Lu-O})_c$  the capping ligands in tricapped trigonal prismatic configuration. Data in purple text are not included in the mean distance as they are uncertain or differ significantly from the mean value.

### Lutetium(III)

#### Eight-coordination

| ICSD/CSD code | $d(\text{Lu-O})$ | Reference, compound formula                                                                                                                                                                                                                                                                                          |
|---------------|------------------|----------------------------------------------------------------------------------------------------------------------------------------------------------------------------------------------------------------------------------------------------------------------------------------------------------------------|
| BIQPOJ        | 2.226 Å          | Smith, J. A.; Singh-Wilmot, M. A.; Carter, K. P.; Cahill, C. L.; Ridenour, J. A. <i>Cryst. Growth Des.</i> <b>2019</b> , <i>19</i> , 305. $[\text{Lu}(\text{H}_2\text{O})_8][\text{Lu}_3\text{C}_{48}\text{Br}_{24}\text{O}_{24}] \cdot 6\text{H}_2\text{O}$                                                         |
| VEHNII        | 2.300 Å          | Shen, F.-F.; Chen, K.; Hua, Z.-Y.; Wang, Y.; Xu, J.; Chen, M.-D.; Zhang, Y.-Q.; Tao, Z. <i>CrystEngComm</i> <b>2017</b> , <i>19</i> , 5635. $[\text{Lu}(\text{H}_2\text{O})_8] \text{Cl}(\text{NO}_3)_2 \cdot (\text{C}_{44}\text{H}_{52}\text{N}_{24}\text{O}_{14}) \cdot 9\text{H}_2\text{O}$                      |
| 91459         | 2.303 Å          | Lim, K. C.; Skelton, B. W.; White, A. H. <i>Aust. J. Chem.</i> <b>2000</b> , <i>53</i> , 867. $[\text{Lu}(\text{H}_2\text{O})_8]\text{I}_3$                                                                                                                                                                          |
| GAHTIV        | 2.304 Å          | Zhao, W.; Wang, C.; Zhang, Y.; Zhang, Y.; Xue, S.; Tao, Z.; Clegg, J. K.; Zhu, Q.; Lindoy, L. F.; Wei, G. <i>New. J. Chem.</i> <b>2016</b> , <i>40</i> , 2763. $[\text{Lu}(\text{H}_2\text{O})_8](\text{C}_{42}\text{H}_{45}\text{N}_{24}\text{O}_{18}) \cdot 23\text{H}_2\text{O}$                                  |
| IXOFAE        | 2.309 Å          | Cherkasova, E. V.; Peresyphkina, E. V.; Virovets, A. V.; Cherkasova, T. G. <i>Zh. Neorg. Khim.</i> <b>2016</b> , <i>61</i> , 174. $[\text{Lu}(\text{H}_2\text{O})_8][\text{Cr}(\text{NCS})_6] \cdot 5\text{H}_2\text{O}$                                                                                             |
| WIXCUE        | 2.311 Å          | Janicki, R.; Mondry, A. <i>Dalton Trans.</i> <b>2019</b> , <i>48</i> , 3380. $[\text{Lu}(\text{H}_2\text{O})_8]\text{Cl}_3 \cdot \text{C}_{12}\text{H}_{24}\text{O}_6$                                                                                                                                               |
| HIDFAD        | 2.314 Å          | Yamada, M.; Hamada, F. <i>CrystEngComm</i> <b>2013</b> , <i>15</i> , 5703. $[\text{Lu}(\text{H}_2\text{O})_8]_2(\text{C}_{36}\text{H}_{18}\text{O}_{24}\text{S}_{12}) \cdot 16\text{H}_2\text{O}$                                                                                                                    |
| AHISEQ        | 2.315 Å          | Thuery, P. <i>Inorg. Chem.</i> <b>2009</b> , <i>48</i> , 4497. $[\text{Lu}(\text{H}_2\text{O})_8][\text{LuReC}_{36}\text{H}_{44}\text{N}_{24}\text{O}_{20}]_2(\text{ReO}_4)_4(\text{NO}_3)_3 \cdot 2\text{H}_2\text{O}$                                                                                              |
| IPIGAR        | 2.316 Å          | Yang, B.; Gao, Z.-Z.; Lu, J.-H.; Zhu, Q.-J.; Xue, S.-F.; Tao, Z.; Prior, T. J.; Redshaw, C.; Wei, G.; Xiao, X. <i>CrystEngComm</i> <b>2016</b> , <i>18</i> , 5028. $[\text{Lu}(\text{H}_2\text{O})_8]\text{Cl}_3 \cdot (\text{C}_{40}\text{H}_{44}\text{N}_{24}\text{O}_{12}) \cdot 14\text{H}_2\text{O}$            |
| SERRIU        | 2.316 Å          | Bai, Z.; Scheibe, B.; Sperling, J. M.; Albrecht-Schonzart, T. E. <i>Cryst. Growth Des.</i> <b>2022</b> , <i>22</i> , 5504. $[\text{Lu}(\text{H}_2\text{O})_8](\text{C}_3\text{H}_5\text{N}_6)_3 \cdot 3\text{H}_2\text{O}$                                                                                           |
| YURFEX        | 2.318 Å          | Trzesowska-Kruszynska, A.; Kruszynski, R.; Zalewicz, M.; Bartczak, T. J. <i>J. Coord. Chem.</i> <b>2010</b> , <i>63</i> , 1013. $[\text{Lu}(\text{H}_2\text{O})_8](\text{NO}_3)_3 \cdot 2(\text{C}_6\text{H}_{12}\text{N}_4) \cdot 2\text{H}_2\text{O}$                                                              |
| 87630         | 2.319 Å          | Junk, P.C.; Semenova, L. I.; Skelton, B. W.; White, A. H. <i>Aust. J. Chem.</i> <b>1999</b> , <i>52</i> , 531. $[\text{Lu}(\text{H}_2\text{O})_8]\text{Br}_3$                                                                                                                                                        |
| CEQNEU        | 2.321 Å          | Chesnokov, G. A.; Topchiy, M. A.; Asachenko, A. F.; Muravyev, N. V.; Grishin, L. I.; Nikiforova, A. S.; Utochnikova, V. V.; Rybakov, V. B.; Khrustalev, V. N.; Nechaev, M. S. <i>Eur. J. Inorg. Chem.</i> <b>2018</b> , 805. $[\text{Lu}(\text{H}_2\text{O})_8]_2(\text{C}_2\text{N}_8)_3 \cdot 3\text{H}_2\text{O}$ |
| VUMSAY        | 2.321 Å          | Steinhauser, G.; Giester, G.; Wagner, C.; Leopold, N.; Sterba, J. H.; Lendl, B.; Bichler, M. <i>Helv. Chim. Acta</i> <b>2009</b> , <i>92</i> , 1371. $[\text{Lu}(\text{H}_2\text{O})_8]_2(\text{C}_2\text{N}_{10})_3 \cdot 6\text{H}_2\text{O}$                                                                      |

|             |                              |                                                                                                                                                                                                              |
|-------------|------------------------------|--------------------------------------------------------------------------------------------------------------------------------------------------------------------------------------------------------------|
| GIPCOX      | 2.329 Å                      | Rogers, R. D. <i>J. Coord. Chem.</i> <b>1988</b> , <i>16</i> , 415. [Lu(H <sub>2</sub> O) <sub>8</sub> ]Cl <sub>3</sub> ·1.5C <sub>8</sub> H <sub>16</sub> O <sub>4</sub> ·2H <sub>2</sub> O.                |
| FOPPOP      | 2.337 Å                      | Rogers, R. D.; Voss, E. J. <i>Inorg. Chim. Acta</i> <b>1987</b> , <i>133</i> , 181. Na[Lu(H <sub>2</sub> O) <sub>8</sub> ]Cl <sub>3</sub> ·C <sub>16</sub> H <sub>32</sub> O <sub>8</sub> ·2H <sub>2</sub> O |
| FILVUR      | 2.347 Å                      | Rogers, R. D.; Kurihara, L. K. <i>Inorg. Chim. Acta</i> <b>1987</b> , <i>130</i> , 131. [Lu(H <sub>2</sub> O) <sub>8</sub> ]Cl <sub>3</sub> ·2C <sub>10</sub> H <sub>20</sub> O <sub>5</sub>                 |
| <b>Mean</b> | <b>2.318 Å/16 structures</b> |                                                                                                                                                                                                              |

*Nine-coordination, tricapped trigonal prism*

ICSD/CSD code  $d(\text{Lu-O})_p + d(\text{Lu-O})_c$  Reference, compound formula

|             |                                                    |                                                                                                                                                                                                                                             |
|-------------|----------------------------------------------------|---------------------------------------------------------------------------------------------------------------------------------------------------------------------------------------------------------------------------------------------|
| BUVVUJ01    | 2.287 + 2.520 Å                                    | Chatterjee, A.; Maslen, E. N.; Watson, K. J. <i>Acta Crystallogr., Sect. B</i> <b>1988</b> , <i>44</i> , 381.<br>[Lu(H <sub>2</sub> O) <sub>6</sub> ](CF <sub>3</sub> SO <sub>3</sub> ) <sub>3</sub>                                        |
| RAPXUC      | 2.287 + 2.499 Å                                    | Abbasi, A.; Lindqvist-Reis, P.; Eriksson, L.; Sandström, D.; Lidin, S.; Persson, I.; Sandström, M. <i>Chem. Eur. J.</i> <b>2005</b> , <i>11</i> , 4065. [Lu(H <sub>2</sub> O) <sub>9</sub> ](CF <sub>3</sub> SO <sub>3</sub> ) <sub>3</sub> |
| 37208       | 2.291 + 2.509 Å                                    | Harrowfield, J. B.; Kepert, D. L.; Patrick, J. M.; White, A. H. <i>Aust. J. Chem.</i> <b>1983</b> , <i>36</i> , 483.<br>[Lu(H <sub>2</sub> O) <sub>9</sub> ](CF <sub>3</sub> SO <sub>3</sub> ) <sub>3</sub>                                 |
| BUVVUJ      |                                                    |                                                                                                                                                                                                                                             |
| ZZZARM01    | 2.318 + 2.497 Å                                    | Gerkin, R. E.; Reppart, W. J. <i>Acta Crystallogr., Sect. C</i> 1984, <i>40</i> , 781. [Lu(H <sub>2</sub> O) <sub>9</sub> ](C <sub>2</sub> H <sub>5</sub> SO <sub>4</sub> ) <sub>3</sub>                                                    |
| <b>Mean</b> | <b>2.296 + 2.506 Å/4 structures, mean: 2.366 Å</b> |                                                                                                                                                                                                                                             |



**Table S1aa.** Summary of solid state structures containing a hydrated and solvated thorium(IV) ions and hydroxo complexes. The ICSD/CDS code refers to the code in the Inorganic Crystal Structure Database (ICSD, number) and Cambridge Structure Database (CSD, letters), respectively, and the mean Th-O bond distance,  $d(\text{Th-O})$ ;  $d(\text{Th-O})_{\text{OH}}$  denotes Th-O bond distance to hydroxo ligands. Data in purple text are not included in the mean distance as they are uncertain or differ significantly from the mean value.

### Thorium(IV)

#### *Eight-coordination*

| ICSD/CSD code | $d(\text{Th-O})$ | Reference, compound formula                                                                                                           |
|---------------|------------------|---------------------------------------------------------------------------------------------------------------------------------------|
| N/A           | 2.404 Å          | Torapava, N.; Lundberg, D.; Persson, I. <i>Eur. J. Inorg. Chem.</i> <b>2011</b> , 5273. $[\text{Th}(\text{dmpu})_8]^{4+}$ (solution). |

#### *Nine-coordination*

| ICSD/CSD code | $d(\text{Th-O})$            | Reference, compound formula                                                                                                                                                                                                                                             |
|---------------|-----------------------------|-------------------------------------------------------------------------------------------------------------------------------------------------------------------------------------------------------------------------------------------------------------------------|
| AHOGAG        | 2.478 Å                     | Pohl, R. W. H.; Wiebke, J.; Klein, A.; Dolg, M.; Maggiasosa, N. <i>Eur. J. Inorg. Chem.</i> <b>2009</b> , 2472. $[(\text{H}_2\text{O})_7\text{Th}(\text{OH})_2\text{Th}(\text{H}_2\text{O})_7](\text{C}_2\text{N}_8)_2\text{C}_2\text{HN}_8 \cdot 10\text{H}_2\text{O}$ |
| AXUFAA        | 2.446 Å                     | Harrowfield, J. M.; Ogden, M. I.; Skelton, B. W.; White, A. H. <i>Inorg. Chim. Acta</i> <b>1995</b> , 357. $[\text{Th}(\text{OS}(\text{CH}_3)_2)_9](\text{ClO}_4)_4 \cdot 4(\text{CH}_3)_2\text{SO}$                                                                    |
| HUZLOE        | 2.449 Å                     | Torapava, N.; Lundberg, D.; Persson, I. <i>Eur. J. Inorg. Chem.</i> <b>2011</b> , 5273-5278. $[\text{Th}(\text{OS}(\text{CH}_3)_2)_9]_2(\text{CF}_3\text{SO}_3)_9 \cdot 2\text{H}_2\text{O}$                                                                            |
| <b>Mean</b>   | <b>2.448 Å/2 structures</b> |                                                                                                                                                                                                                                                                         |

#### *Nine-coordination, double hydroxo bridge*

| ICSD/CSD code | $d(\text{Th-O})_{\text{OH}} + d(\text{Th-O})/d(\text{Th} \cdots \text{Th})$ | Reference, compound formula                                                                                                                                                                                                                                               |
|---------------|-----------------------------------------------------------------------------|---------------------------------------------------------------------------------------------------------------------------------------------------------------------------------------------------------------------------------------------------------------------------|
| AHOGAG        | 2.371 + 2.508 Å<br>3.993 Å                                                  | Pohl, R. W. H.; Wiebke, J.; Klein, A.; Dolg, M.; Maggiasosa, N. <i>Eur. J. Inorg. Chem.</i> <b>2009</b> , 2472. $[(\text{H}_2\text{O})_7\text{Th}(\text{OH})_2\text{Th}(\text{H}_2\text{O})_7](\text{C}_2\text{N}_8)_2(\text{C}_2\text{HN}_8) \cdot 10\text{H}_2\text{O}$ |

*Ten-coordination*

| ICSD/CSD code | $d(\text{Th-O})$ | Reference, compound formula                                                                                                                                                      |
|---------------|------------------|----------------------------------------------------------------------------------------------------------------------------------------------------------------------------------|
| 418199        | 2.498 Å          | Wilson, R. E.; Skanthakumar, S.; Burns, P.C.; Soderholm, L. <i>Angew. Chem, Int. Ed.</i> <b>2007</b> , <i>46</i> , 8043.<br>[Th(H <sub>2</sub> O) <sub>10</sub> ]Br <sub>4</sub> |

| ICSD/CSD code | $d(\text{Th-O})_{\text{OH}} + d(\text{Th-O})/d(\text{Th}\cdots\text{Th})$ | Reference, compound formula                                                                                                                                                                                                                                                              |
|---------------|---------------------------------------------------------------------------|------------------------------------------------------------------------------------------------------------------------------------------------------------------------------------------------------------------------------------------------------------------------------------------|
| HUZLOE        | 2.471 + 2.410 Å                                                           | Torapava, N.; Persson, I.; Eriksson, L.; Lundberg, D. <i>Inorg. Chem.</i> <b>2009</b> , <i>48</i> , 11712.<br>[H <sub>5</sub> O <sub>2</sub> ][Th(H <sub>2</sub> O) <sub>6</sub> (OSO <sub>2</sub> CF <sub>3</sub> ) <sub>3</sub> ][Th(OSO <sub>2</sub> CF <sub>3</sub> ) <sub>6</sub> ] |

**Table S1ab.** Summary of solid state structures containing a hydrated and solvated uranium(III), uranium(IV) and dioxouranium(VI) (uranyl(VI)) ions. The ICSD/CDS code refers to the code in the Inorganic Crystal Structure Database (ICSD, number) and Cambridge Structure Database (CSD, letters), respectively, and the mean U-O bond distance,  $d(\text{U-O})$ ;  $d(\text{U-O})_p$  denotes ligands forming the prism and  $d(\text{U-O})_c$  the capping ligands in tricapped trigonal prismatic configuration,  $d(\text{U-O})_{\text{SO}_4}$  denotes binding to sulfate ion (mono- or bidentate), and  $d(\text{U-O})_o$  denotes binding to oxo groups. Data in purple text are not included in the mean distance as they are uncertain or differ significantly from the mean value.

### Uranium(III)

#### *Nine-coordination*

| ICSD/CSD code | $d(\text{U-O})_p + d(\text{U-O})_c$              | Reference, compound formula                                                                                                                                                                                                                                                                                                                      |
|---------------|--------------------------------------------------|--------------------------------------------------------------------------------------------------------------------------------------------------------------------------------------------------------------------------------------------------------------------------------------------------------------------------------------------------|
| PUTQOL        | 2.509+2.596 Å                                    | Apostolidis, C.; Schimmelpfennig, B.; Magnani, N.; Lindqvist-Reis, P.; Walter, O.; Sykora, R.; Morgenstern, A.; Colineau, E.; Caciuffo, R.; Klenze, R.; Haire, R. G.; Rebizant, J.; Bruchertseifer, F.; Fanghänel, T. <i>Angew. Chem., Int. Ed.</i> <b>2010</b> , <i>49</i> , 6343. $[\text{U}(\text{H}_2\text{O})_9](\text{CF}_3\text{SO}_3)_3$ |
| <b>Mean</b>   | <b>2.509 + 2.596 Å/1 structure; mean 2.538 Å</b> |                                                                                                                                                                                                                                                                                                                                                  |

| ICSD/CSD code | $d(\text{U-O})_p$ | Reference, compound formula                                                                                                                           |
|---------------|-------------------|-------------------------------------------------------------------------------------------------------------------------------------------------------|
| YEKNEI        | 2.521 Å           | Berthet, J.-C.; Thuery, P.; Ephritikhine, M. <i>Inorg. Chem.</i> <b>2005</b> , <i>44</i> , 1142. $[\text{U}(\text{OCHN}(\text{CH}_3)_2)_9]\text{I}_3$ |

### Uranium(IV)

#### *Eight-coordination*

| ICSD/CSD code | $d(\text{U-O}) + d(\text{U-O})_{\text{SO}_4}$ | Reference, compound formula                                                                                                                           |
|---------------|-----------------------------------------------|-------------------------------------------------------------------------------------------------------------------------------------------------------|
| 24057         | 2.388 + 2.432 Å                               | Kierkegaard, P. <i>Acta Chem. Scand.</i> <b>1956</b> , <i>10</i> , 599-616. $[\text{U}(\text{H}_2\text{O})_6(\text{OSO}_3)_2]_n$                      |
| FIDFEY        | 2.390 Å                                       | Berthet, J.-C.; Thuery, P.; Ephritikhine, M. <i>Inorg. Chem.</i> <b>2005</b> , <i>44</i> , 1142. $[\text{U}(\text{OCHN}(\text{CH}_3)_2)_9]\text{I}_4$ |
| <b>Mean</b>   | <b>2.395 Å/2 structures</b>                   |                                                                                                                                                       |

#### *Ten-coordination*

| ICSD/CSD code | $d(\text{U-O}) + d(\text{U-O})_{\text{SO}_4}$    | Reference, compound formula                                                                                                                                                           |
|---------------|--------------------------------------------------|---------------------------------------------------------------------------------------------------------------------------------------------------------------------------------------|
| EGUQAA        | 2.416 + 2.504 Å                                  | Burns, A. D.; Patrick, B. O.; Lam, A. E.; Dreisinger, D. <i>Acta Crystallogr., Sect. C</i> <b>2014</b> , <i>70</i> , 726. $[\text{U}(\text{H}_2\text{O})_4(\text{O}_2\text{SO}_2)]_n$ |
| <b>Mean</b>   | <b>2.416 + 2.504 Å/1 structure; mean 2.451 Å</b> |                                                                                                                                                                                       |

**Dioxouranium(VI)/Uranyl(VI)s***Seven-coordination (pentahydration)*ICSD/CSD code  $d(\text{U-O})_o + d(\text{U-O})_t$ 

NUUDUM 1.751+2.405 Å

FIBDOM 1.756+2.392 Å

LEYYOD 1.758+2.408 Å

TONSOF 1.759+2.460 Å

FUVFOR 1.762+2.417 Å

RORQEW 1.765+2.403 Å

OLADOW 1.766+2.470 Å

FUVFIL 1.903+2.401 Å

**Mean 1.760+2.422 Å/7 structures**

Reference, compound formula

Thuery, P *CrystEngComm* **2009**, *11*, 1081.  $[\text{UO}_2(\text{H}_2\text{O})_5][(\text{UO}_2)\text{C}_{24}\text{H}_{18}\text{O}_{12}] \cdot 5\text{H}_2\text{O}$ Thuery, P.; Atoini, Y.; Harrowfield, J. *Cryst Growth Des.* **2018**, *18*, 3167. $[\text{UO}_2(\text{H}_2\text{O})_5][\text{UO}_2(\text{C}_9\text{H}_{10}\text{O}_6)_2]_2 \cdot 3\text{C}_8\text{H}_{16}\text{O}_4 \cdot 2\text{H}_2\text{O}$ Deshayes, L.; Keller, N.; Lance, M.; Nierlich, M.; Vigner, J.-D. *Acta Crystallogr., Sect. C* **1994**, *50*, 1541.  $[\text{UO}_2(\text{H}_2\text{O})_5](\text{CF}_3\text{SO}_3)_2 \cdot (\text{C}_{12}\text{H}_{24}\text{O}_6)$ Thuery, P *CrystEngComm* **2008**, *8*, 4132.  $[\text{UO}_2(\text{H}_2\text{O})_5](\text{NO}_3)_2 \cdot \text{C}_{36}\text{H}_{36}\text{N}_{24}\text{O}_{12} \cdot 4\text{H}_2\text{O}$ Rogers, R. D.; Kurihara, I. K.; Benning, M. M. *J. Inclusion Phenom. Mol. Recog. Chem.* **1987**, *5*, 645.  $[\text{UO}_2(\text{H}_2\text{O})_5](\text{ClO}_4)_2 \cdot 2(\text{C}_{12}\text{H}_{24}\text{O}_6) \cdot 2\text{CH}_3\text{CN} \cdot \text{H}_2\text{O}$ Thuery, P.; Harrowfield, J. *Cryst Growth Des.* **2014**, *14*, 4214. $[\text{UO}_2(\text{H}_2\text{O})_5][\text{UO}_2(\text{C}_9\text{H}_9\text{O}_5)]_2 \cdot 3\text{C}_4\text{H}_8\text{O} \cdot 2\text{H}_2\text{O}$ Novikov, S. A.; Peresypkina, E. V.; Serezhkina, L. B.; Virovets, A. V.; Serezhkin, V. N. *Russ. J. Inorg. Chem.* **2014**, *59*, 63.  $[\text{UO}_2(\text{H}_2\text{O})_5][(\text{C}_6\text{H}_3\text{NO}_2)\text{UO}_2-(\text{Cr}_2\text{O}_7)\text{UO}_2-\text{C}_6\text{H}_3\text{NO}_2]$ Rogers, R. D.; Kurihara, I. K.; Benning, M. M. *J. Inclusion Phenom. Mol. Recog. Chem.* **1987**, *5*, 645.  $[\text{UO}_2(\text{H}_2\text{O})_5](\text{ClO}_4)_2 \cdot 3(\text{C}_{10}\text{H}_{20}\text{O}_5) \cdot \text{CH}_3\text{CN} \cdot \text{H}_2\text{O}$

**Table S1ac.** Summary of solid state structures containing a hydrated and solvated neptunium(III), neptunium(IV) and dioxo neptunium(VI) (neptyl(VI)) ions. The ICSD/CDS code refers to the code in the Inorganic Crystal Structure Database (ICSD, number) and Cambridge Structure Database (CSD, letters), respectively, and the mean Np-O bond distance,  $d(\text{Np-O})$ ;  $d(\text{Np-O})_p$  denotes ligands forming the prism and  $d(\text{Np-O})_c$  the capping ligands in tricapped trigonal prismatic configuration,  $d(\text{Np-O})_{\text{SO}_4}$  denotes binding to sulfate ion (mono- or bidentate), and  $d(\text{Np-O})_o$  denotes binding to oxo groups. Data in purple text are not included in the mean distance as they are uncertain or differ significantly from the mean value.

### Neptunium(III)

#### *Nine-coordination*

| ICSD/CSD code | $d(\text{Np-O})_p + d(\text{Np-O})_c$             | Reference, compound formula                                                                                                                                                                                                                                                                                                                       |
|---------------|---------------------------------------------------|---------------------------------------------------------------------------------------------------------------------------------------------------------------------------------------------------------------------------------------------------------------------------------------------------------------------------------------------------|
| PUTQIF        | 2.490+2.571 Å                                     | Apostolidis, C.; Schimmelpfennig, B.; Magnani, N.; Lindqvist-Reis, P.; Walter, O.; Sykora, R.; Morgenstern, A.; Colineau, E.; Caciuffo, R.; Klenze, R.; Haire, R. G.; Rebizant, J.; Bruchertseifer, F.; Fanghänel, T. <i>Angew. Chem., Int. Ed.</i> <b>2010</b> , <i>49</i> , 6343. $[\text{Np}(\text{H}_2\text{O})_9](\text{CF}_3\text{SO}_3)_3$ |
| <b>Mean</b>   | <b>2.490 + 2.571 Å/1 structures; mean 2.517 Å</b> |                                                                                                                                                                                                                                                                                                                                                   |

### Neptunium(IV)

#### *Eight-coordination*

| ICSD/CSD code | $d(\text{Np-O}) + d(\text{Np-O})_{\text{SO}_4}$ | Reference, compound formula                                                                                                                                                                                                                                              |
|---------------|-------------------------------------------------|--------------------------------------------------------------------------------------------------------------------------------------------------------------------------------------------------------------------------------------------------------------------------|
| 92110         | 2.341 + 2.316 Å                                 | Charushnikova, I. A.; Krot, N. N.; Starikova, Z. A. <i>Radiokhimiya</i> <b>2000</b> , <i>42</i> , 393. $[\text{Np}(\text{H}_2\text{O})_4(\text{OSO}_3)_2]_n$                                                                                                             |
| IRUDII        | 2.336 Å                                         | Charushnikova, I. A.; Starikova, Z. A.; Shirokova, I. B.; Fedoseev, A. M.; Grigor'ev, M. S.; Budantse, N. A. <i>Koord. Khim.</i> <b>2003</b> , <i>29</i> , 290. $[\text{Np}(\text{OCNH}_2)_8]\text{W}_{12}\text{SiO}_{40} \cdot 2\text{OCNH}_2 \cdot \text{H}_2\text{O}$ |
| <b>Mean</b>   | <b>2.335 Å/2 structures</b>                     |                                                                                                                                                                                                                                                                          |

### Neptunium(VI)/Neptyl(VI)

#### *Seven-coordination (pentahydration)*

| ICSD/CSD code | $d(\text{Np-O})_o + d(\text{Np-O})$ | Reference, compound formula                                                                                                           |
|---------------|-------------------------------------|---------------------------------------------------------------------------------------------------------------------------------------|
| 421143        | 1.744+2.416 Å                       | Grigor'ev, M. S.; Krot, N. N. <i>Radiokhim.</i> <b>2010</b> , <i>52</i> , 318. $[\text{NpO}_2(\text{H}_2\text{O})_5](\text{ClO}_4)_2$ |

**Table S1ad.** Summary of solid state structures containing a hydrated plutonium(III), plutonium(IV) and dioxoplutonium(VI) (plutonyl(VI)) ions. The ICSD/CDS code refers to the code in the Inorganic Crystal Structure Database (ICSD, number) and Cambridge Structure Database (CSD, letters), respectively, and the mean Pu-O bond distance,  $d(\text{Pu-O})$ ;  $d(\text{Pu-O})_p$  denotes ligands forming the prism and  $d(\text{Pu-O})_c$  the capping ligands in tricapped trigonal prismatic configuration,  $d(\text{Pu-O})_{\text{SO}_4}$  denotes binding to sulfate ion (monodendate), and  $d(\text{Pu-O})_o$  denotes binding to oxo groups. Data in purple text are not included in the mean distance as they are uncertain or differ significantly from the mean value.

### Plutonium(III)

#### Nine-coordination

| ICSD/CSD code    | $d(\text{Pu-O})_p + d(\text{Pu-O})_c$             | Reference, compound formula                                                                                                                                                                                                                                                                                                                         |
|------------------|---------------------------------------------------|-----------------------------------------------------------------------------------------------------------------------------------------------------------------------------------------------------------------------------------------------------------------------------------------------------------------------------------------------------|
| MOSBEB<br>280848 | 2.476 + 2.574 Å                                   | Matonic, J. H.; Scott, B. L.; Neu, M. P. <i>Inorg. Chem.</i> <b>2001</b> , <i>40</i> , 2638. $[\text{Pu}(\text{H}_2\text{O})_9](\text{CF}_3\text{SO}_3)_3$                                                                                                                                                                                          |
| MOSBEB01         | 2.472 + 2.571 Å                                   | Apostolidis, C.; Schimmelpfennig, B.; Magnani, N.; Lindqvist-Reis, P.; Walter, O.; Sykora, R.; Morgenstern, A.; Colineau, E.; Caciuffo, R.; Klenze, R.; Haire, R. G.; Rebizant, J.; Bruchertseifer, F.; Fanghänel, T. <i>Angew. Chem., Int. Ed.</i> <b>2010</b> , <i>49</i> , 6343. $[\text{Pu}(\text{H}_2\text{O})_9](\text{CF}_3\text{SO}_3)_3$ . |
| MOSBEB2          | 2.477+2.568 Å                                     | Apostolidis, C.; Schimmelpfennig, B.; Magnani, N.; Lindqvist-Reis, P.; Walter, O.; Sykora, R.; Morgenstern, A.; Colineau, E.; Caciuffo, R.; Klenze, R.; Haire, R. G.; Rebizant, J.; Bruchertseifer, F.; Fanghänel, T. <i>Angew. Chem., Int. Ed.</i> <b>2010</b> , <i>49</i> , 6343. $[\text{Pu}(\text{H}_2\text{O})_9](\text{CF}_3\text{SO}_3)_3$ . |
| <b>Mean</b>      | <b>2.475 + 2.571 Å/3 structures; mean 2.506 Å</b> |                                                                                                                                                                                                                                                                                                                                                     |

### Plutonium(IV)

#### Eight-coordination

| ICSD/CSD code | $d(\text{Pu-O}) + d(\text{Pu-O})_{\text{SO}_4}$ | Reference, compound formula                                                                                                                                           |
|---------------|-------------------------------------------------|-----------------------------------------------------------------------------------------------------------------------------------------------------------------------|
| 31290         | 2.331 + 2.341 Å                                 | Jayadevan, N. C.; Singh Mudher, K. D.; Chackraburty, D. M. <i>Z. Kristallogr.</i> <b>1982</b> , <i>161</i> , 7. $[\text{Pu}(\text{H}_2\text{O})_4(\text{OSO}_3)_2]_n$ |
| <b>Mean</b>   | <b>2.334 Å/1 structure</b>                      |                                                                                                                                                                       |

### Plutonium(VI)

#### Seven-coordination

| ICSD/CSD code | $d(\text{Pu-O})_o + d(\text{Pu-O})$ | Reference, compound formula                                                                                                           |
|---------------|-------------------------------------|---------------------------------------------------------------------------------------------------------------------------------------|
| 421144        | 1.732 + 2.409 Å                     | Grigor'ev, M. S.; Krot, N. N. <i>Radiokhim.</i> <b>2010</b> , <i>52</i> , 318. $[\text{PuO}_2(\text{H}_2\text{O})_5](\text{ClO}_4)_2$ |
| <b>Mean</b>   | <b>1.732 + 2.409 Å/1 structure</b>  |                                                                                                                                       |

**Table S1ae.** Summary of solid state structures containing a hydrated americium(III), curium(III) and californium(III) ions. The ICSD/CDS code refers to the code in the Inorganic Crystal Structure Database (ICSD, number) and Cambridge Structure Database (CSD, letters), respectively, and the mean M-O bond distance,  $d(\text{M-O})$ ;  $d(\text{M-O})_p$  denotes ligands forming the prism and  $d(\text{M-O})_c$  the capping ligands in tricapped trigonal prismatic configuration, and  $d(\text{Am-O})_{\text{SO}_4}$  denotes binding to sulfate ion (monodendate) Data in purple text are not included in the mean distance as they are uncertain or differ significantly from the mean value.

### Americium(III)

#### *Eight-coordination*

ICSD/CSD code  $d(\text{Am-O}) + d(\text{Am-O})_{\text{SO}_4}$  Reference, compound formula

10392 2.450 + 2.446 Å Burns, J. H.; Baybarz, R. D. *Inorg. Chem.* **1972**, *11*, 2233.  $[\text{Am}(\text{H}_2\text{O})_4(\text{OSO}_3)_2]_n \cdot 4\text{H}_2\text{O}$

**Mean 2.449 Å/1 structure**

#### *Nine-coordination*

ICSD/CSD code  $d(\text{Am-O})_p + d(\text{Am-O})_c$  Reference, compound formula

YEVRUN 2.466 + 2.578 Å Lindqvist-Reis, P.; Apostolidis, C.; Rebizant, J.; Morgenstern, A.; Klenze, R.; Walter, O.; Fanghaenel, T.; 240737 Haire, R. G. *Angew. Chem., Int. Ed.* **2007**, *46*, 919.  $[\text{Am}(\text{H}_2\text{O})_9](\text{CF}_3\text{SO}_3)_3$ .

**Mean 2.466 + 2.578 Å/1 structure; mean 2.503 Å**

### Curium(III)

#### *Nine-coordination*

ICSD/CSD code  $d(\text{Cm-O})_p + d(\text{Cm-O})_c$  Reference, compound formula

YEVROH 2.453 + 2.564 Å Lindqvist-Reis, P.; Apostolidis, C.; Rebizant, J.; Morgenstern, A.; Klenze, R.; Walter, O.; Fanghaenel,

240738 T.; Haire, R. G. *Angew. Chem., Int. Ed.* **2007**, *46*, 919.  $[\text{Cm}(\text{H}_2\text{O})_9](\text{CF}_3\text{SO}_3)_3$ .

249457 2.453 + 2.545 Å Skanthakumar, S.; Antonio, M. R.; Wilson, R. E.; Soderholm, L. *Inorg. Chem.* **2007**, *46*, 3485.  $[\text{Cm}(\text{H}_2\text{O})_9](\text{CF}_3\text{SO}_3)_3$ .

**Mean 2.453 + 2.555 Å/2 structures; mean 2.487 Å**

### Californium(III)

*Nine-coordination*

| ICSD/CSD code | $d(\text{Cf-O})_p + d(\text{Cf-O})_c$ | Reference, compound formula                                                                                                                                                                                                                                                                                                                         |
|---------------|---------------------------------------|-----------------------------------------------------------------------------------------------------------------------------------------------------------------------------------------------------------------------------------------------------------------------------------------------------------------------------------------------------|
| PUTQEB        | 2.423+2.550 Å                         | Apostolidis, C.; Schimmelpfennig, B.; Magnani, N.; Lindqvist-Reis, P.; Walter, O.; Sykora, R.; Morgenstern, A.; Colineau, E.; Caciuffo, R.; Klenze, R.; Haire, R. G.; Rebizant, J.; Bruchertseifer, F.; Fanghänel, T. <i>Angew. Chem., Int. Ed.</i> <b>2010</b> , <i>49</i> , 6343. $[\text{Cf}(\text{H}_2\text{O})_9](\text{CF}_3\text{SO}_3)_3$ . |

**Mean**        **2.423 + 2.550 Å/1 structure; mean 2.465 Å**



**Table S1af.** Summary of solid state structures containing hydrated aluminum(III) ions. The ICSD/CDS code refers to the code in the Inorganic Crystal Structure Database (ICSD, number) and Cambridge Structure Database (CSD, letters), respectively, and the mean Al-O bond distance,  $d(\text{Al-O})$ . Data in purple text are not included in the mean distance as they are uncertain or differ significantly from the mean value.

### Aluminum(III)

#### *Six-coordination, octahedral configuration*

| ICSD/CSD code | $d(\text{Al-O})$ | Reference, compound formula                                                                                                                                                                                                                                                                                                                                                                                                                                                                                                                                                                                                                                              |
|---------------|------------------|--------------------------------------------------------------------------------------------------------------------------------------------------------------------------------------------------------------------------------------------------------------------------------------------------------------------------------------------------------------------------------------------------------------------------------------------------------------------------------------------------------------------------------------------------------------------------------------------------------------------------------------------------------------------------|
| 23614         | 1.760 Å          | Mereiter, K., <i>Naturwissenschaften</i> <b>1970</b> , <i>57</i> , 670. $[\text{Al}(\text{H}_2\text{O})_6]\text{Cd}_5\text{Fe}_3\text{Tl}_2(\text{SO}_4)_{12}\cdot 12\text{H}_2\text{O}$                                                                                                                                                                                                                                                                                                                                                                                                                                                                                 |
| 431916        | 1.765 Å          | Wang, G.; Mudring, A.-V. <i>Solid State Sci.</i> <b>2016</b> , <i>61</i> , 58. $[\text{Al}(\text{H}_2\text{O})_6]\text{F}_3$                                                                                                                                                                                                                                                                                                                                                                                                                                                                                                                                             |
| 77599         | 1.850 Å          | Abdeen, A. M.; Will, G.; Schaefer, W.; Kirfel, A.; Bargouth, M.O.; Recker, K.; Weiss, A., <i>Z. Kristallogr.</i> <b>1981</b> , <i>157</i> , 147. $(\text{CH}_3\text{NH}_3)[\text{Al}(\text{H}_2\text{O})_6](\text{SO}_4)_2\cdot 6\text{H}_2\text{O}$                                                                                                                                                                                                                                                                                                                                                                                                                     |
| 96598         | 1.861 Å          | Lovas, G. A., <i>Acta Geol. Hung.</i> <b>1986</b> , <i>29</i> , 389. $[\text{Al}(\text{H}_2\text{O})_6][\text{Fe}(\text{H}_2\text{O})_6](\text{SO}_4)_4\cdot 4\text{H}_2\text{O}$                                                                                                                                                                                                                                                                                                                                                                                                                                                                                        |
| MAMALM        | 1.864 Å          | Fletcher, R. O. W.; Steeple, H., <i>Acta Crystallogr.</i> <b>1964</b> , <i>17</i> , 290. $(\text{CH}_3\text{NH}_3)[\text{Al}(\text{H}_2\text{O})_6](\text{SO}_4)_2\cdot 6\text{H}_2\text{O}$                                                                                                                                                                                                                                                                                                                                                                                                                                                                             |
| 100401        | 1.869 Å          | Abdeen, A. M.; Will, G.; Weiss, A., <i>Z. Kristallogr.</i> <b>1981</b> , <i>154</i> , 45.; <i>Proc. Royal Soc. London, Ser. A</i> <b>1958</b> , <i>246</i> , 78.; <i>Proc. Royal Soc. London, Ser. A</i> <b>1935</b> , <i>148</i> , 664.; <i>Proc. Royal Soc. London, Ser. A</i> <b>1935</b> , <i>151</i> , 347.; <i>Acta Crystallogr.</i> <b>1962</b> , <i>15</i> , 960.; <i>Acta Crystallogr.</i> <b>1967</b> , <i>22</i> , 793.; <i>Acta Crystallogr., Sect. B</i> <b>1968</b> , <i>24</i> , 320.; <i>Acta Crystallogr., Sect. B</i> <b>1969</b> , <i>25</i> , 398. $(\text{H}_3\text{NOH})[\text{Al}(\text{H}_2\text{O})_6](\text{SO}_4)_2\cdot 6\text{H}_2\text{O}$ |
| INUTIX        | 1.871 Å          | Zarychta, B.; Czaplá, Z.; Przeslawski, J.; Szklarz, P. <i>Acta Crystallogr., Sect. B</i> <b>2021</b> , <i>77</i> , 225. $[\text{Al}(\text{H}_2\text{O})_6](\text{C}_3\text{H}_5\text{N}_2)(\text{SO}_4)_2$                                                                                                                                                                                                                                                                                                                                                                                                                                                               |
| GUALSU10      | 1.872 Å          | Schein, B. J. B.; Lingafelter, E. C.; Stewart, J. M. <i>J. Chem. Phys.</i> <b>1967</b> , <i>47</i> , 5183. $(\text{C}(\text{NH}_2)_3)[\text{Al}(\text{H}_2\text{O})_6](\text{SO}_4)_2$                                                                                                                                                                                                                                                                                                                                                                                                                                                                                   |
| 71863         | 1.873 Å          | Blackburn, A. C.; Gallucci, J. C.; Gerkin, R. E. <i>Acta Crystallogr., Sect. C</i> <b>1992</b> , <i>48</i> , 1185. $[\text{Al}(\text{H}_2\text{O})_6](\text{BrO}_3)_2\cdot 4\text{H}_2\text{O}$                                                                                                                                                                                                                                                                                                                                                                                                                                                                          |
| EVUWAV        | 1.873 Å          | Vinokur, A. I.; Guzei, I. A. CCDCdeposition number 1507365, <b>2016</b> . $[\text{Al}(\text{H}_2\text{O})_6][\text{K}(\text{H}_2\text{O})_6](\text{SO}_4)_2$                                                                                                                                                                                                                                                                                                                                                                                                                                                                                                             |
| 188355        | 1.873 Å          | Majzlan, Juraj; Schlicht, Hannes; Wierzbicka-Wieczorek, Maria; Giester, Gerald; Poellmann, Herbert; Broemme, Beatrix; Doyle, Stephen; Buth, Gernot; Bender Koch, C. <i>Miner. Petrol.</i> <b>2013</b> , <i>107</i> , 221. $\text{K}_2[\text{Al}(\text{H}_2\text{O})_6]\text{Fe}_8(\text{SO}_4)_{12}\cdot 12\text{H}_2\text{O}$                                                                                                                                                                                                                                                                                                                                           |
| 72671         | 1.874 Å          | Lazar, D.; Ribar, B.; Prelesnik, B., <i>Acta Crystallogr., Sect. C</i> <b>1991</b> , <i>47</i> , 2282. $[\text{Al}(\text{H}_2\text{O})_6](\text{NO}_3)_3\cdot 3\text{H}_2\text{O}$                                                                                                                                                                                                                                                                                                                                                                                                                                                                                       |
| 280547        | 1.874 Å          | Nyburg, S. C.; Steed, J.; Aleksovská, S.; Petrusevski, V. M., <i>Acta Crystallogr., Sect. B</i> <b>2000</b> , <i>56</i> , 204. $\text{K}[\text{Al}(\text{H}_2\text{O})_6](\text{SO}_4)_2\cdot 6\text{H}_2\text{O}$                                                                                                                                                                                                                                                                                                                                                                                                                                                       |

|          |         |                                                                                                                                                                                                                                                                                                                                                                        |
|----------|---------|------------------------------------------------------------------------------------------------------------------------------------------------------------------------------------------------------------------------------------------------------------------------------------------------------------------------------------------------------------------------|
| XIWMIZ   | 1.874 Å | Mashiyama, H.; Kajio, N.; Kasano, H.; Gesi, K., <i>J. Korean Phys. Soc.</i> <b>1998</b> , <i>32</i> , 186.<br>(CH <sub>3</sub> NH <sub>3</sub> ) <sub>2</sub> [Al(H <sub>2</sub> O) <sub>6</sub> ]Br <sub>5</sub>                                                                                                                                                      |
| 33357    | 1.875 Å | Li, Y.; Huang, J.; Chen, H. <i>J Alloys Compd.</i> <b>2021</b> , <i>856</i> , 157852. [Al(H <sub>2</sub> O) <sub>6</sub> ] <sub>3</sub> (IO <sub>3</sub> ) <sub>9</sub> ·6HIO <sub>3</sub>                                                                                                                                                                             |
| 34621    | 1.875 Å | Schein, B. J. B.; Lingafelter, E. C.; Stewart, J. M., <i>J. Chem. Phys.</i> <b>1967</b> , <i>47</i> , 5183; <i>Acta Crystallogr., Sect. B</i> <b>1968</b> , <i>24</i> , 1131. [Al(H <sub>2</sub> O) <sub>6</sub> ][Al(H <sub>2</sub> O) <sub>4</sub> (OCOFCF <sub>3</sub> ) <sub>2</sub> ](CF <sub>3</sub> COO) <sub>4</sub>                                           |
| 188360   | 1.875 Å | Majzlan, Juraj; Schlicht, Hannes; Wierzbicka-Wieczorek, Maria; Giester, Gerald; Poellmann, Herbert; Broemme, Beatrix; Doyle, Stephen; Buth, Gernot; Bender Koch, C. <i>Miner. Petrol.</i> <b>2013</b> , <i>107</i> , 221.<br>(NH <sub>4</sub> ) <sub>2</sub> [Al(H <sub>2</sub> O) <sub>6</sub> ]Fe <sub>8</sub> (SO <sub>4</sub> ) <sub>12</sub> ·12 H <sub>2</sub> O |
| GUALSU10 | 1.875 Å | Schein, B. J. B.; Lingafelter, E. C.; Stewart, J. M., <i>J. Chem. Phys.</i> <b>1967</b> , <i>47</i> , 5183.<br>(CH <sub>6</sub> N <sub>3</sub> )[Al(H <sub>2</sub> O) <sub>6</sub> ](SO <sub>4</sub> ) <sub>2</sub>                                                                                                                                                    |
| GUMWOA   | 1.875 Å | Samsonenko, D. G.; Sokolov, M. N.; Virovets, A. V.; Pervukhina, N. V.; Fedin, V. P. <i>Eur. J. Inorg. Chem.</i> <b>2001</b> , 167. [Al(H <sub>2</sub> O) <sub>6</sub> ]Cl <sub>3</sub> ·C <sub>36</sub> H <sub>36</sub> N <sub>24</sub> O <sub>12</sub> ·18H <sub>2</sub> O                                                                                            |
| YEBTIL   | 1.875 Å | Morozov, I. V.; Karpova, E. V.; Glazunova, T. Y.; Boltalin, A. I.; Zakharov, M. A.; Tereshchenko, D. S.; Fedorova, A. A.; Troyanov, S. I. <i>Khoord. Khim.</i> <b>2016</b> , <i>42</i> , 647. [Al(H <sub>2</sub> O) <sub>6</sub> ](SO <sub>4</sub> ) <sub>2</sub> ·6H <sub>2</sub> O                                                                                   |
| 31832    | 1.876 Å | Lipson, H., <i>Philosophical Magazine, Serie 7</i> <b>1935</b> , <i>19</i> , 887; <i>Proc. Royal Soc. London, Ser. A</i> <b>1935</b> , <i>151</i> , 347. ((CH <sub>3</sub> )NH <sub>3</sub> )[Al(H <sub>2</sub> O) <sub>6</sub> ](SO <sub>4</sub> ) <sub>2</sub> ·6H <sub>2</sub> O                                                                                    |
| 112862   | 1.876 Å | Wang, D.; Bai, Z.; Liu, L.; Hu, L.; Huang, Y.; Yuan, F.; Wei, D.; Lin, Z.; Zhang, L. <i>Cryst Growth Des.</i> <b>2021</b> , <i>21</i> , 1734. [Al(H <sub>2</sub> O) <sub>6</sub> ](IO <sub>3</sub> ) <sub>3</sub> ·2HIO <sub>3</sub>                                                                                                                                   |
| 201215   | 1.876 Å | Beattie, J. K.; Best, S. P.; Skelton, B. W.; White, A. H., <i>J. Chem. Soc., Dalton Trans.</i> <b>1981</b> , 2105.<br>Cs[Al(H <sub>2</sub> O) <sub>6</sub> ](SO <sub>4</sub> ) <sub>2</sub> ·6H <sub>2</sub> O                                                                                                                                                         |
| 280548   | 1.876 Å | Nyburg, S. C.; Steed, J.; Aleksovskaja, S.; Petrusevski, V. M., <i>Acta Crystallogr., Sect. B</i> <b>2000</b> , <i>56</i> , 204.<br>K[Al(H <sub>2</sub> O) <sub>6</sub> ](SO <sub>4</sub> ) <sub>2</sub> ·6H <sub>2</sub> O                                                                                                                                            |
| AMAKUW   | 1.876 Å | Bednarchuk, T. J.; Kinzhybalo, V.; Bednarchuk, O.; Pietraszko, A. <i>J. Mol. Struct.</i> <b>2016</b> , <i>1120</i> , 138.<br>[Al(H <sub>2</sub> O) <sub>6</sub> ](C <sub>3</sub> H <sub>5</sub> NH <sub>2</sub> )(SO <sub>4</sub> ) <sub>2</sub> ·4H <sub>2</sub> O                                                                                                    |
| BEBDAO   | 1.876 Å | Bataille, T. <i>Acta Crystallogr., Sect. C</i> <b>2003</b> , <i>59</i> , m459. (H <sub>2</sub> N(CH <sub>2</sub> ) <sub>2</sub> NH <sub>2</sub> )(SO <sub>4</sub> ) <sub>4</sub> ·8H <sub>2</sub> O                                                                                                                                                                    |
| HUWQIA   | 1.876 Å | Siegler, M. A.; Prewitt, J. H.; Kelley, S. P.; Parkin, S.; Selegue, J. P.; Brock, C. P. <i>Acta Crystallogr., Sect. B</i> <b>2010</b> , <i>66</i> , 213. [Al(H <sub>2</sub> O) <sub>6</sub> ](NO <sub>3</sub> ) <sub>3</sub> ·C <sub>10</sub> H <sub>20</sub> O <sub>5</sub> ·4H <sub>2</sub> O                                                                        |
| 68908    | 1.877 Å | del Favero, P.; Skelton, B. W.; White, A. H. <i>Aust. J. Chem.</i> <b>1990</b> , <i>43</i> , 393. Cs[Al(H <sub>2</sub> O) <sub>6</sub> ](SeO <sub>4</sub> ) <sub>2</sub> ·6H <sub>2</sub> O                                                                                                                                                                            |
| 133602   | 1.877 Å | Svensson, F. <i>Acta Crystallogr., Sect. E</i> <b>2021</b> , <i>77</i> , 58. [Al(H <sub>2</sub> O) <sub>6</sub> ]NO <sub>3</sub> SO <sub>4</sub> ·2H <sub>2</sub> O                                                                                                                                                                                                    |
| 261241   | 1.877 Å | Bao, L.; Ling, Y.; Lixin, W. <i>Acta Crystallogr., Sect. E</i> <b>2011</b> , <i>67</i> , i8. [Al(H <sub>2</sub> O) <sub>6</sub> ][Cr(OH) <sub>6</sub> ][Mo <sub>6</sub> O <sub>18</sub> ]·10H <sub>2</sub> O                                                                                                                                                           |
| GEZPAC   | 1.877 Å | Karlsson, M.; Boström, D.; Öhman, L.-O. <i>Acta Chem. Scand.</i> <b>1998</b> , <i>52</i> , 995.<br>[Al(H <sub>2</sub> O) <sub>6</sub> ][Al(O <sub>5</sub> C <sub>4</sub> H <sub>6</sub> ) <sub>2</sub> ]Cl <sub>2</sub> ·4H <sub>2</sub> O                                                                                                                             |

|          |         |                                                                                                                                                                                                                                                                                                                                                                                                                               |
|----------|---------|-------------------------------------------------------------------------------------------------------------------------------------------------------------------------------------------------------------------------------------------------------------------------------------------------------------------------------------------------------------------------------------------------------------------------------|
| OROYAW   | 1.877 Å | Danylyuk, O.; Lesniewska, B.; Suwinska, K.; Matoussi, N.; Coleman, A. W. <i>Cryst. Growth Des.</i> <b>2010</b> , <i>10</i> , 4542. [Al(H <sub>2</sub> O) <sub>6</sub> ](C <sub>5</sub> H <sub>5</sub> N(CH <sub>2</sub> ) <sub>2</sub> C <sub>5</sub> H <sub>5</sub> N) <sub>2.5</sub> (C <sub>28</sub> H <sub>20</sub> O <sub>16</sub> S <sub>4</sub> ) <sub>2</sub> ·7.6H <sub>2</sub> O·(CH <sub>3</sub> ) <sub>2</sub> CO |
| 8225     | 1.878 Å | Ginderow, D.; Cesbron, F. <i>Acta Crystallogr., Sect. B</i> <b>1979</b> , <i>35</i> , 2499. [Al(H <sub>2</sub> O) <sub>6</sub> ][CuCl](SO <sub>4</sub> ) <sub>2</sub> ·8H <sub>2</sub> O                                                                                                                                                                                                                                      |
| 12129    | 1.878 Å | Fang, J. H.; Robinson, P. D. <i>Am. Mineral.</i> <b>1976</b> , <i>61</i> , 311. [Al(H <sub>2</sub> O) <sub>6</sub> ] <sub>2</sub> (SO <sub>4</sub> ) <sub>3</sub> ·5H <sub>2</sub> O                                                                                                                                                                                                                                          |
| 26005    | 1.878 Å | Fang, J. H.; Robinson, P. D. <i>Am. Mineral.</i> <b>1972</b> , <i>57</i> , 1081. Na[Al(H <sub>2</sub> O) <sub>6</sub> ](SO <sub>4</sub> ) <sub>2</sub> ·5H <sub>2</sub> O.                                                                                                                                                                                                                                                    |
| 96765    | 1.878 Å | Morozov, I. V.; Marsova, M. V.; Troyanov, S. I. <i>Zh. Neorg. Khim.</i> <b>2002</b> , <i>47</i> , 1055. [Al(H <sub>2</sub> O) <sub>6</sub> ](NO <sub>3</sub> ) <sub>3</sub>                                                                                                                                                                                                                                                   |
| 121250   | 1.878 Å | Liu, Y.; Hao, M.; Gao, J.; Liu, J.; Cui, J. Z. <i>Kristallogr. – New Cryst. Struct.</i> <b>2020</b> , <i>235</i> , 1393. H <sub>3</sub> O[Al(H <sub>2</sub> O) <sub>6</sub> ]SO <sub>4</sub> ·6H <sub>2</sub> O                                                                                                                                                                                                               |
| 133603   | 1.878 Å | Svensson, F. <i>Acta Crystallogr., Sect. E</i> <b>2021</b> , <i>77</i> , 58. [Al(H <sub>2</sub> O) <sub>6</sub> ](Cl)SO <sub>4</sub> ·2H <sub>2</sub> O                                                                                                                                                                                                                                                                       |
| 280550   | 1.878 Å | Nyburg, S. C.; Steed, J.; Aleksovskaja, S.; Petrusevski, V. M., <i>Acta Crystallogr., Sect. B</i> <b>2000</b> , <i>56</i> , 204. TI[Al(H <sub>2</sub> O) <sub>6</sub> ](SO <sub>4</sub> ) <sub>2</sub> ·6H <sub>2</sub> O                                                                                                                                                                                                     |
| BEBDAO01 | 1.878 Å | Ghadermazi, M.; Aghabozorg, H.; Sheshmani, S. <i>Acta Crystallogr., Sect. E</i> <b>2007</b> , <i>63</i> , m1919. (H <sub>2</sub> N(CH <sub>2</sub> ) <sub>2</sub> NH <sub>2</sub> )(SO <sub>4</sub> ) <sub>4</sub> ·8H <sub>2</sub> O                                                                                                                                                                                         |
| GEHKUD   | 1.878 Å | Pastel, G. R.; Chen, Y.; Pollard, T. P.; Schroeder, M. A.; Bowden, M. E. Zheng, A.; Hahn, N.; Ma, L.; Ding, M., Murugesan, V.; Ho, J.; Garaga, M.; Borodin, O.; Müller, K.; Greenbaum, S.; Xu, K. <b>2022</b> , CCDC deposit no. 2141675.                                                                                                                                                                                     |
| IQECEM   | 1.878 Å | Malone, S. A.; Cooper, P.; Heath, S. L. <i>Dalton Trans.</i> <b>2003</b> , 4572. [Al(H <sub>2</sub> O) <sub>6</sub> ][Al <sub>3</sub> C <sub>12</sub> H <sub>18</sub> O <sub>20</sub> ] <sub>2</sub> NO <sub>3</sub> ·6H <sub>2</sub> O                                                                                                                                                                                       |
| LEHREX01 | 1.878 Å | Wang, R.; Li, R.; Jiang, H.; Gong, H.; Bi, Y. <i>J. Coord. Chem.</i> <b>2017</b> , <i>70</i> , 1327. [Al(H <sub>2</sub> O) <sub>6</sub> ](CH <sub>3</sub> SO <sub>3</sub> ) <sub>3</sub>                                                                                                                                                                                                                                      |
| ZASQIT   | 1.878 Å | Kiripichnikova, L. F.; Petrashko, A.; Shuvalov, L. A., <i>Kristallografiya.</i> <b>1995</b> , <i>40</i> , 520. ((CH <sub>3</sub> ) <sub>2</sub> NH <sub>2</sub> )[Al(H <sub>2</sub> O) <sub>6</sub> ](SO <sub>4</sub> ) <sub>1.78</sub> (SeO <sub>4</sub> ) <sub>0.22</sub>                                                                                                                                                   |
| LEHREX   | 1.879 Å | Trella, T.; Frank, W. <i>Acta Crystallogr., Sect. E.</i> <b>2012</b> , <i>68</i> , m1136. [Al(H <sub>2</sub> O) <sub>6</sub> ](CH <sub>3</sub> SO <sub>3</sub> ) <sub>3</sub>                                                                                                                                                                                                                                                 |
| 4405     | 1.880 Å | Hopkins, T. E.; Zalkin, A.; Templeton, D. H.; Adamson, M. G. <i>Inorg. Chem.</i> <b>1969</b> , <i>8</i> , 2421. [Al(H <sub>2</sub> O) <sub>6</sub> ][RuCl <sub>6</sub> ]·4H <sub>2</sub> O                                                                                                                                                                                                                                    |
| 30566    | 1.880 Å | Lingafelter, E. C.; Orioli, P. L.; Schein, B. J. B.; Stewart, J. M. <i>Acta Crystallogr.</i> <b>1966</b> , <i>20</i> , 451, 456. (C(NH <sub>2</sub> ) <sub>3</sub> )[Al(H <sub>2</sub> O) <sub>6</sub> ](SO <sub>4</sub> ) <sub>2</sub>                                                                                                                                                                                       |
| 280549   | 1.880 Å | Nyburg, S. C.; Steed, J.; Aleksovskaja, S.; Petrusevski, V. M. <i>Acta Crystallogr., Sect. B</i> <b>2000</b> , <i>56</i> , 204. TI[Al(H <sub>2</sub> O) <sub>6</sub> ](SO <sub>4</sub> ) <sub>2</sub> ·6H <sub>2</sub> O                                                                                                                                                                                                      |
| 428449   | 1.880 Å | Sun, X.; Sun, Y.; Yu, J. <i>Crystal Res. Technol.</i> <b>2015</b> , <i>50</i> , 293. [Al(H <sub>2</sub> O) <sub>6</sub> ] <sub>2</sub> (SO <sub>4</sub> ) <sub>3</sub> ·4H <sub>2</sub> O                                                                                                                                                                                                                                     |
| APAPAJ   | 1.880 Å | Lesniewska, B.: Danylyuk, O.; Suwinska, K.; Wojciechowski, T.; Coleman, A. W. <i>CrystEngComm</i> <b>2011</b> <i>13</i> , 3265. [Al(H <sub>2</sub> O) <sub>6</sub> ](C <sub>12</sub> H <sub>10</sub> N <sub>2</sub> )(C <sub>12</sub> H <sub>9</sub> N <sub>2</sub> ) <sub>3</sub> (C <sub>28</sub> H <sub>20</sub> O <sub>16</sub> S <sub>4</sub> ) <sub>2</sub> ·18H <sub>2</sub> O                                         |
| SOGGEA01 | 1.880 Å | John Plater, M.; Harrison, W. T. A. <i>J. Chem. Res.</i> <b>2015</b> , <i>39</i> , 279. [Al(H <sub>2</sub> O) <sub>6</sub> ] <sub>2</sub> (C <sub>6</sub> (COO) <sub>6</sub> )·4H <sub>2</sub> O                                                                                                                                                                                                                              |
| TAPBOB   | 1.880 Å | Galesic, N.; Jordanovska, V. B. <i>Acta Crystallogr., Sect. C</i> <b>1992</b> , <i>48</i> , 256. ((CH <sub>3</sub> ) <sub>2</sub> NH <sub>2</sub> )[Al(H <sub>2</sub> O) <sub>6</sub> ](SO <sub>4</sub> ) <sub>2</sub>                                                                                                                                                                                                        |
| TAPBOB02 | 1.880 Å | Pietraszko, A.; Lukaszewicz, K. <i>Pol. J. Chem.</i> <b>1994</b> , <i>68</i> , 1239. ((CH <sub>3</sub> ) <sub>2</sub> NH <sub>2</sub> )[Al(H <sub>2</sub> O) <sub>6</sub> ](SO <sub>4</sub> ) <sub>2</sub>                                                                                                                                                                                                                    |

|          |         |                                                                                                                                                                                                                                                                                |
|----------|---------|--------------------------------------------------------------------------------------------------------------------------------------------------------------------------------------------------------------------------------------------------------------------------------|
| 14306    | 1.881 Å | Kay, M. I.; Cromer, D. T. <i>Acta Crystallogr., Sect. B</i> <b>1970</b> , 26, 1349; <i>Acta Crystallogr.</i> <b>1967</b> , 22, 182. Na[Al(H <sub>2</sub> O) <sub>6</sub> ](SO <sub>4</sub> ) <sub>2</sub> ·6H <sub>2</sub> O                                                   |
| 15368    | 1.881 Å | Cromer, D. T.; Kay, M. I.; Larson, A. C. <i>Acta Crystallogr.</i> <b>1967</b> , 22, 182. Na[Al(H <sub>2</sub> O) <sub>6</sub> ](SO <sub>4</sub> ) <sub>2</sub> ·6H <sub>2</sub> O                                                                                              |
| 87339    | 1.881 Å | Fischer, T.; Kniep, R.; Wunderlich, H. Z. <i>Kristallogr.</i> <b>1996</b> , 211, 469. (H <sub>3</sub> O) <sub>2</sub> [Al(H <sub>2</sub> O) <sub>6</sub> ] <sub>2</sub> (SO <sub>4</sub> ) <sub>4</sub> ·10H <sub>2</sub> O                                                    |
| 96764    | 1.881 Å | Morozov, I. V.; Marsova, M. V.; Troyanov, S. I. <i>Zh. Neorg. Khim.</i> <b>2002</b> , 47, 1055. [Al(H <sub>2</sub> O) <sub>6</sub> ](NO <sub>3</sub> ) <sub>3</sub> .                                                                                                          |
| EKOYAG   | 1.881 Å | Bednarchuk, T. J.; Kinzhybalo, V.; Pietraszko, A. <i>Acta Crystallogr., Sect. C</i> <b>2016</b> , 72, 432. ((2-C <sub>5</sub> H <sub>5</sub> NH <sub>2</sub> )[Al(H <sub>2</sub> O) <sub>6</sub> ](SO <sub>4</sub> ) <sub>2</sub> ·4H <sub>2</sub> O                           |
| HEKMUF   | 1.881 Å | Steed, J. W.; M <sup>c</sup> Cool, B. J.; Junk, P. C. <i>J. Chem. Soc., Dalton Trans.</i> <b>1998</b> , 3417. [Al(H <sub>2</sub> O) <sub>6</sub> ](NO <sub>3</sub> ) <sub>3</sub> ·C <sub>12</sub> H <sub>24</sub> O <sub>6</sub>                                              |
| 9254     | 1.882 Å | Mereiter, K. <i>Tschermaks Mineral. Petrogr. Mitteil.</i> <b>1972</b> , 18, 185. K <sub>2</sub> [Al(H <sub>2</sub> O) <sub>6</sub> ]Fe <sub>5</sub> Fe <sub>3</sub> (SO <sub>4</sub> ) <sub>12</sub> ·12H <sub>2</sub> O                                                       |
| IFEWIA   | 1.882 Å | Shen, R.; Pan, X.; Wang, H.; Yao, L.; Wu, J.; Tang, N. <i>Dalton Trans.</i> <b>2008</b> , 3574. Al(H <sub>2</sub> O) <sub>6</sub> (ClO <sub>4</sub> ) <sub>3</sub> ·2C <sub>21</sub> H <sub>22</sub> O <sub>7</sub>                                                            |
| MEWZIX01 | 1.882 Å | Dalrymple, S. A.; Parvez, M.; Shimizu, G. K. H. <i>Inorg. Chem.</i> <b>2002</b> , 6986. Al(H <sub>2</sub> O) <sub>6</sub> (ClO <sub>9</sub> H <sub>9</sub> (SO <sub>3</sub> ) <sub>3</sub> )·CH <sub>3</sub> OH                                                                |
| TAPBOB04 | 1.882 Å | Kiripichnikova, K.; Petrashko, A.; Lukashevich, K.; Shuvalov, L. A.; Dolbinina, V. V.; Yalovleva, L. M. <i>Kristallografiya.</i> <b>1994</b> , 39, 1078. ((CH <sub>3</sub> ) <sub>2</sub> NH <sub>2</sub> )[Al(H <sub>2</sub> O) <sub>6</sub> ](SO <sub>4</sub> ) <sub>2</sub> |
| TAPBOB11 | 1.882 Å | Kiosse, G. A.; Razdobreev, I. M.; Kiripichnikova, L. F.; Malinovskii, T. I.; Shuvalov, L. A. <i>Kristallografiya.</i> <b>1994</b> , 39, 34. ((CH <sub>3</sub> ) <sub>2</sub> NH <sub>2</sub> )[Al(H <sub>2</sub> O) <sub>6</sub> ](SO <sub>4</sub> ) <sub>2</sub>              |
| 244213   | 1.882 Å | Schmidt, H.; Hennings, E.; Voigtm W. <i>Acta Crystallogr., Sect. C.</i> <b>2014</b> , 70, 882. [Al(H <sub>2</sub> O) <sub>6</sub> ]Br <sub>3</sub> ·9H <sub>2</sub> O                                                                                                          |
| 22071    | 1.883 Å | Buchanan, D. R.; Harris, P. M. <i>Acta Crystallogr., Sect. B</i> <b>1968</b> , 24, 954. [Al(H <sub>2</sub> O) <sub>6</sub> ]Cl <sub>3</sub>                                                                                                                                    |
| 244212   | 1.883 Å | Schmidt, H.; Hennings, E.; Voigtm W. <i>Acta Crystallogr., Sect. C.</i> <b>2014</b> , 70, 882. [Al(H <sub>2</sub> O) <sub>6</sub> ]Cl <sub>3</sub> ·9H <sub>2</sub> O                                                                                                          |
| 244215   | 1.883 Å | Schmidt, H.; Hennings, E.; Voigtm W. <i>Acta Crystallogr., Sect. C.</i> <b>2014</b> , 70, 882. [Al(H <sub>2</sub> O) <sub>6</sub> ]I <sub>3</sub> ·11H <sub>2</sub> O                                                                                                          |
| 250369   | 1.883 Å | Krivovchev, S. V. <i>Zapiski Vserossiiskogo Miner. Obshchestva</i> <b>2006</b> , 96. [Al(H <sub>2</sub> O) <sub>6</sub> ](SeO <sub>4</sub> )NO <sub>3</sub> ·H <sub>2</sub> O                                                                                                  |
| TAPBOB03 | 1.883 Å | Kiripichnikova, K.; Petrashko, A.; Lukashevich, K.; Shuvalov, L. A.; Dolbinina, V. V.; Yalovleva, L. M. <i>Kristallografiya.</i> <b>1994</b> , 39, 1078. ((CH <sub>3</sub> ) <sub>2</sub> NH <sub>2</sub> )[Al(H <sub>2</sub> O) <sub>6</sub> ](SO <sub>4</sub> ) <sub>2</sub> |
| 100857   | 1.883 Å | Abdeen, A. M.; Will, G.; Schaefer, W.; Kirfel, A.; Bargouth, M. O.; Recker, K.; Weiss, A. Z. <i>Kristallogr.</i> <b>1981</b> , 157, 147. NH <sub>4</sub> [Al(H <sub>2</sub> O) <sub>6</sub> ](SO <sub>4</sub> ) <sub>2</sub> ·6H <sub>2</sub> O                                |
| 200028   | 1.883 Å | Cradwick, P. D.; de Endredy, A. S. <i>J. Chem. Soc., Dalton Trans.</i> <b>1977</b> , 146. H <sub>2</sub> [Al(H <sub>2</sub> O) <sub>6</sub> ](IO <sub>3</sub> ) <sub>5</sub>                                                                                                   |
| 200619   | 1.883 Å | Sorokina, N. I.; Ilyukhin, V. V.; Kalinin, V. R.; Belov, N. V. <i>Dokl. Akad. Nauk SSSR</i> <b>1979</b> , 247, 360. [Al(H <sub>2</sub> O) <sub>6</sub> ](IO <sub>3</sub> ) <sub>3</sub> ·2H <sub>2</sub> O                                                                     |
| 4038     | 1.884 Å | Menchetti, S.; Sabelli, C. <i>Mineral. Magazine</i> <b>1976</b> , 40, 599. [Al(H <sub>2</sub> O) <sub>6</sub> ] <sub>2</sub> [Mn(H <sub>2</sub> O) <sub>6</sub> ](SO <sub>4</sub> ) <sub>4</sub> ·4H <sub>2</sub> O                                                            |

|          |         |                                                                                                                                                                                                                                                                                                                                                                                                               |
|----------|---------|---------------------------------------------------------------------------------------------------------------------------------------------------------------------------------------------------------------------------------------------------------------------------------------------------------------------------------------------------------------------------------------------------------------|
| 4292     | 1.884 Å | Menchetti, S.; Sabelli, C. <i>Tschermaks Mineal. Petrogr. Mitteilungen</i> <b>1974</b> , <i>21</i> , 164.<br>[Al(H <sub>2</sub> O) <sub>6</sub> ] <sub>2</sub> (SO <sub>4</sub> ) <sub>3</sub> ·4.4H <sub>2</sub> O                                                                                                                                                                                           |
| 20163    | 1.884 Å | Sorokina, N. I.; Ilyukhin, V. V.; Kalinin, V. R.; Belov, N. V. <i>Dokl. Akad. Nauk SSSR</i> <b>1979</b> , <i>247</i> , 360.<br>[Al(H <sub>2</sub> O) <sub>6</sub> ](IO <sub>3</sub> ) <sub>3</sub> ·2H <sub>2</sub> O                                                                                                                                                                                         |
| 77600    | 1.884 Å | Abdeen, A. M.; Will, G.; Schaefer, W.; Kirfel, A.; Bargouth, M.O.; Recker, K.; Weiss, A. <i>Z. Kristallogr.</i> <b>1981</b> , <i>157</i> , 147. (CH <sub>3</sub> NH <sub>3</sub> )[Al(H <sub>2</sub> O) <sub>6</sub> ](SO <sub>4</sub> ) <sub>2</sub> ·6H <sub>2</sub> O                                                                                                                                      |
| OROXUP   | 1.884 Å | Danylyuk, O.; Lesniewska, B.; Suwinska, K.; Matoussi, N.; Coleman, A. W. <i>Cryst. Growth Des.</i> <b>2010</b> , <i>10</i> , 4542. [Al(H <sub>2</sub> O) <sub>6</sub> ](C <sub>5</sub> H <sub>5</sub> N(CH <sub>2</sub> ) <sub>2</sub> C <sub>5</sub> H <sub>5</sub> N) <sub>2.5</sub> (C <sub>28</sub> H <sub>20</sub> O <sub>16</sub> S <sub>4</sub> ) <sub>2</sub> ·6.6H <sub>2</sub> O·CH <sub>3</sub> OH |
| 14316    | 1.885 Å | Cromer, D. T.; Kay, M. I.; Larson, A. C. <i>Acta Crystallogr.</i> <b>1966</b> , <i>21</i> , 383. Cs[Al(H <sub>2</sub> O) <sub>6</sub> ](SO <sub>4</sub> ) <sub>2</sub> ·6H <sub>2</sub> O                                                                                                                                                                                                                     |
| 188767   | 1.885 Å | Mereiter, K. <i>Acta Crystallogr., Sect. E</i> <b>2013</b> , <i>69</i> , i63. Na[Al(H <sub>2</sub> O) <sub>6</sub> ](SO <sub>4</sub> ) <sub>2</sub>                                                                                                                                                                                                                                                           |
| 244214   | 1.885 Å | Schmidt, H.; Hennings, E.; Voigt W. <i>Acta Crystallogr., Sect. C</i> <b>2014</b> , <i>70</i> , 882. [Al(H <sub>2</sub> O) <sub>6</sub> ] <sub>3</sub> ·9H <sub>2</sub> O                                                                                                                                                                                                                                     |
| MEWZIX01 | 1.885 Å | Dalrymple, S. A.; Parvez, M.; Shimizu, G. K. H. <i>Inorg. Chem.</i> <b>2002</b> , <i>41</i> , 6986. Cs[Al(H <sub>2</sub> O) <sub>6</sub> ](1,3,5-C <sub>6</sub> H <sub>3</sub> (CH <sub>2</sub> SO <sub>3</sub> ) <sub>3</sub> )·3CH <sub>3</sub> OH                                                                                                                                                          |
| SOGGEA   | 1.885 Å | Robl, C.; Kuhs, W. F. <i>J. Solid State Chem.</i> <b>1991</b> , <i>92</i> , 101. [Al(H <sub>2</sub> O) <sub>6</sub> ] <sub>2</sub> (C <sub>6</sub> (COO) <sub>6</sub> )·4H <sub>2</sub> O                                                                                                                                                                                                                     |
| 17061    | 1.886 Å | Kueppers, H.; Schaefer, W.; Will, G. <i>Z. Kristallogr.</i> <b>1982</b> , <i>159</i> , 231. H <sub>2</sub> [Al(H <sub>2</sub> O) <sub>6</sub> ](IO <sub>3</sub> ) <sub>5</sub>                                                                                                                                                                                                                                |
| 41122    | 1.886 Å | Robl, C.; Kuhs, W. F. <i>J. Solid State Chem.</i> <b>1991</b> , <i>92</i> , 101. [Al(H <sub>2</sub> O) <sub>6</sub> ] <sub>2</sub> (C <sub>6</sub> (CO <sub>2</sub> ) <sub>6</sub> )·4H <sub>2</sub> O                                                                                                                                                                                                        |
| 4324     | 1.887 Å | Cradwick, P. D.; de Endredy, A. S. <i>J. Chem. Soc., Dalton Trans.</i> <b>1975</b> , 1926. [Al(H <sub>2</sub> O) <sub>6</sub> ](IO <sub>3</sub> ) <sub>2</sub> (NO <sub>3</sub> )                                                                                                                                                                                                                             |
| TAPBOB06 | 1.887 Å | Kazimirov, V. Yu.; Sarin, V. A.; Ritter, C.; Shuvalov, L. A. <i>Kristallografiya.</i> <b>1999</b> , <i>44</i> , 61.<br>((CH <sub>3</sub> ) <sub>2</sub> NH <sub>2</sub> )[Al(H <sub>2</sub> O) <sub>6</sub> ](SO <sub>4</sub> ) <sub>2</sub>                                                                                                                                                                  |
| 86042    | 1.888 Å | Gobichon, A.-E.; Auffredic, J.-P.; Louer, D. <i>J. Alloys Compd.</i> <b>1998</b> , <i>275</i> , 130. [Al(H <sub>2</sub> O) <sub>6</sub> ]La(NO <sub>3</sub> ) <sub>6</sub>                                                                                                                                                                                                                                    |
| 244216   | 1.888 Å | Schmidt, H.; Hennings, E.; Voigt W. <i>Acta Crystallogr., Sect. C</i> <b>2014</b> , <i>70</i> , 882. [Al(H <sub>2</sub> O) <sub>6</sub> ]Br <sub>3</sub> ·11H <sub>2</sub> O                                                                                                                                                                                                                                  |
| JAYPII   | 1.888 Å | Cameron, T. S.; Chute, W. J.; Owen, G.; Aheme, J.; Linden, A. <i>Acta Crystallogr., Sect. C</i> <b>1990</b> , <i>46</i> , 231.<br>[Al(H <sub>2</sub> O) <sub>6</sub> ](HSO <sub>4</sub> ) <sub>3</sub>                                                                                                                                                                                                        |
| 17060    | 1.889 Å | Kueppers, H.; Schaefer, W.; Will, G. <i>Z. Kristallogr.</i> <b>1982</b> , <i>159</i> , 231. H <sub>2</sub> [Al(H <sub>2</sub> O) <sub>6</sub> ](IO <sub>3</sub> ) <sub>5</sub>                                                                                                                                                                                                                                |
| HEHZON   | 1.889 Å | Zhao, X. <b>2022</b> , CCDC deposit no. 1045703.                                                                                                                                                                                                                                                                                                                                                              |
| 86041    | 1.890 Å | Gobichon, A.-E.; Auffredic, J.-P.; Louer, D. <i>J. Alloys Compd.</i> <b>1998</b> , <i>275</i> , 130.<br>[Al(H <sub>2</sub> O) <sub>6</sub> ][La(NO <sub>3</sub> ) <sub>6</sub> ]·6H <sub>2</sub> O                                                                                                                                                                                                            |
| TOZLEB   | 1.890 Å | Kumar, D.; Ramana, A. CCDC deposition number 1041200, <b>2014</b> . [Al(H <sub>2</sub> O) <sub>6</sub> ][Tb(C <sub>7</sub> H <sub>3</sub> O <sub>4</sub> N) <sub>3</sub> ]·10H <sub>2</sub> O                                                                                                                                                                                                                 |
| TOZKUQ   | 1.891 Å | Kumar, D.; Ramana, A. CCDC deposition number 1041198, <b>2014</b> . [Al(H <sub>2</sub> O) <sub>6</sub> ][Gd(C <sub>7</sub> H <sub>3</sub> O <sub>4</sub> N) <sub>3</sub> ]·10H <sub>2</sub> O                                                                                                                                                                                                                 |
| TOZKIE   | 1.892 Å | Kumar, D.; Ramana, A. CCDC deposition number 1041196, <b>2014</b> . [Al(H <sub>2</sub> O) <sub>6</sub> ][Dy(C <sub>7</sub> H <sub>3</sub> O <sub>4</sub> N) <sub>3</sub> ]·10H <sub>2</sub> O                                                                                                                                                                                                                 |
| TOZLAX   | 1.892 Å | Kumar, D.; Ramana, A. CCDC deposition number 1041199, <b>2014</b> . [Al(H <sub>2</sub> O) <sub>6</sub> ][Sm(C <sub>7</sub> H <sub>3</sub> O <sub>4</sub> N) <sub>3</sub> ]·10H <sub>2</sub> O                                                                                                                                                                                                                 |

|                  |                              |                                                                                                                                                                                                                                                                                                                                                                                                                                                                                                                                                                                                                 |
|------------------|------------------------------|-----------------------------------------------------------------------------------------------------------------------------------------------------------------------------------------------------------------------------------------------------------------------------------------------------------------------------------------------------------------------------------------------------------------------------------------------------------------------------------------------------------------------------------------------------------------------------------------------------------------|
| TOZLIF<br>26139  | 1.892 Å<br>1.894 Å           | Kumar, D.; Ramana, A. CCDC deposition number 1041201, <b>2014</b> . [Al(H <sub>2</sub> O) <sub>6</sub> ][Tb(C <sub>7</sub> H <sub>3</sub> O <sub>4</sub> N) <sub>3</sub> ] $\cdot$ 10H <sub>2</sub> O<br>Andress, K. R.; Carpenter C., <i>Z. Kristallogr. Kristallgeom. Kristallphys. Kristallchem.</i> <b>1934</b> , 87, 446.<br>[Al(H <sub>2</sub> O) <sub>6</sub> ]Cl <sub>3</sub>                                                                                                                                                                                                                           |
| TOZKOK<br>100856 | 1.894 Å<br>1.898 Å           | Kumar, D.; Ramana, A. CCDC deposition number 1041197, <b>2014</b> . [Al(H <sub>2</sub> O) <sub>6</sub> ][Eu(C <sub>7</sub> H <sub>3</sub> O <sub>4</sub> N) <sub>3</sub> ] $\cdot$ 10H <sub>2</sub> O<br>Abdeen, A. M.; Will, G.; Schaefer, W.; Kirfel, A.; Bargouth, M. O.; Recker, K.; Weiss, A. <i>Z. Kristallogr.</i> <b>1981</b> , 157, 147. NH <sub>4</sub> [Al(H <sub>2</sub> O) <sub>6</sub> ](SO <sub>4</sub> ) <sub>2</sub> $\cdot$ 6H <sub>2</sub> O                                                                                                                                                 |
| WISSOG<br>31265  | 1.899 Å<br>1.903 Å           | Neu, M. P.; Matonic, J. H.; Ruggiero, C.; Scott, B. L. <i>Angew. Chem., Int. Ed.</i> <b>2000</b> , 39, 1442.<br>[Al(H <sub>2</sub> O) <sub>6</sub> ][PuC <sub>27</sub> H <sub>51</sub> N <sub>6</sub> O <sub>12</sub> ](CF <sub>3</sub> SO <sub>3</sub> ) <sub>5</sub> $\cdot$ 14H <sub>2</sub> O<br>Khosrawan-Sazedj, F. <i>Tschermaks Mineralogische und Petrographische Mitteilungen</i> <b>1982</b> , 30, 111; <i>Acta Crystallogr., Sect. B</i> <b>1979</b> , 35, 3017. [Al(H <sub>2</sub> O) <sub>6</sub> ](UO <sub>2</sub> ) <sub>2</sub> (PO <sub>4</sub> ) <sub>2</sub> (OH) $\cdot$ 8H <sub>2</sub> O |
| 257432           | 1.905 Å                      | Kahlenberg, V.; Braun, D. E.; Krueger, H.; Schmidmair, D.; Orlova, M. <i>Phys. Chem. Miner.</i> <b>2017</b> , 44, 95.<br>[Al(H <sub>2</sub> O) <sub>6</sub> ] <sub>2</sub> (SO <sub>4</sub> ) <sub>3</sub> $\cdot$ 1.8H <sub>2</sub> O                                                                                                                                                                                                                                                                                                                                                                          |
| 14394            | 1.908 Å                      | Larson, A. C.; Cromer, D. T. <i>Acta Crystallogr.</i> <b>1967</b> , 22, 793. K[Al(H <sub>2</sub> O) <sub>6</sub> ](SO <sub>4</sub> ) <sub>2</sub> $\cdot$ 6H <sub>2</sub> O                                                                                                                                                                                                                                                                                                                                                                                                                                     |
| 14396            | 1.917 Å                      | Larson, A. C.; Cromer, D. T. <i>Acta Crystallogr.</i> <b>1967</b> , 22, 793. NH <sub>4</sub> [Al(H <sub>2</sub> O) <sub>6</sub> ](SO <sub>4</sub> ) <sub>2</sub> $\cdot$ 6H <sub>2</sub> O.                                                                                                                                                                                                                                                                                                                                                                                                                     |
| 15187            | 1.917 Å                      | Robinson, P. D.; Fang, J. H. <i>Am. Mineral.</i> <b>1969</b> , 54, 19. Na[Al(H <sub>2</sub> O) <sub>6</sub> ](SO <sub>4</sub> ) <sub>2</sub> $\cdot$ 6H <sub>2</sub> O.                                                                                                                                                                                                                                                                                                                                                                                                                                         |
| 14395            | 1.923 Å                      | Larson, A. C.; Cromer, D. T. <i>Acta Crystallogr.</i> <b>1967</b> , 22, 793. Rb[Al(H <sub>2</sub> O) <sub>6</sub> ](SO <sub>4</sub> ) <sub>2</sub> $\cdot$ 6H <sub>2</sub> O.                                                                                                                                                                                                                                                                                                                                                                                                                                   |
| 26347            | 1.940 Å                      | Piret, P.; Declercq, J. P.; Wauters-Stoop, D. <i>Acta Crystallogr., Sect. B</i> <b>1979</b> , 35, 3017.<br>[Al(H <sub>2</sub> O) <sub>6</sub> ](UO <sub>2</sub> ) <sub>2</sub> (PO <sub>4</sub> ) <sub>2</sub> (OH) $\cdot$ 8H <sub>2</sub> O                                                                                                                                                                                                                                                                                                                                                                   |
| 30245            | 1.940 Å                      | Herpin, P.; Sudarsanan, K. <i>Bull. Soc. Fr. Mineral. Cristallogr.</i> <b>1965</b> , 88, 595. [Al(OH <sub>2</sub> ) <sub>6</sub> ](NO <sub>3</sub> ) <sub>3</sub> $\cdot$ 3H <sub>2</sub> O                                                                                                                                                                                                                                                                                                                                                                                                                     |
| TILXOC           | 1.946 Å                      | Happel, O.; Harms, K.; Seubert, A. <i>Z. Anorg. Allg. Chem.</i> <b>2007</b> , 633, 1952.<br>[Al(OH <sub>2</sub> ) <sub>6</sub> ][Al <sub>4</sub> C <sub>16</sub> H <sub>22</sub> O <sub>26</sub> ]NO <sub>3</sub> $\cdot$ 13H <sub>2</sub> O                                                                                                                                                                                                                                                                                                                                                                    |
| 29283            | 1.979 Å                      | Beevers, C. A.; Lipson, H. <i>Nature</i> <b>1934</b> , 134, 327; <i>Philosophical Magazine, Serie 6</i> <b>1927</b> , 4, 688.<br>K[Al(OH <sub>2</sub> ) <sub>6</sub> ](SO <sub>4</sub> ) <sub>2</sub> $\cdot$ 5H <sub>2</sub> O                                                                                                                                                                                                                                                                                                                                                                                 |
| <b>Mean</b>      | <b>1.882 Å/99 structures</b> |                                                                                                                                                                                                                                                                                                                                                                                                                                                                                                                                                                                                                 |

**Table S1ag.** Summary of solid state structures containing hydrated gallium(III) ions. The ICSD/CDS code refers to the code in the Inorganic Crystal Structure Database (ICSD, number) and Cambridge Structure Database (CSD, letters), respectively, and the mean Ga-O bond distance,  $d(\text{Ga-O})$ . Data in purple text are not included in the mean distance as they are uncertain or differ significantly from the mean value.

### Gallium(III)

#### *Six-coordination, octahedral configuration*

| ICSD/CSD code | $d(\text{Ga-O})$ | Reference, compound formula                                                                                                                                                                                                                                                                                                    |
|---------------|------------------|--------------------------------------------------------------------------------------------------------------------------------------------------------------------------------------------------------------------------------------------------------------------------------------------------------------------------------|
| NABZIA        | 1.930 Å          | Dalgarno, S. J.; Hardie, M. J.; Raston, C. L. <i>Cryst. Growth Des.</i> <b>2004</b> , <i>4</i> , 227.<br>[Ga(H <sub>2</sub> O) <sub>6</sub> ] <sub>2</sub> (C <sub>12</sub> H <sub>28</sub> N <sub>2</sub> O <sub>4</sub> )(C <sub>28</sub> H <sub>20</sub> O <sub>16</sub> S <sub>4</sub> ) <sub>2</sub> ·20H <sub>2</sub> O  |
| 250079        | 1.938 Å          | Kaziev, G. Z.; Dutov, A. A.; Quinones, S. O.; Bel'skii, V. K.; Zavodnik, V. E.; de Ita, A. <i>Zh. Neorg. Khim.</i> <b>2003</b> , <i>48</i> , 1079. [Ga(H <sub>2</sub> O) <sub>6</sub> ][Co(OH) <sub>6</sub> Mo <sub>6</sub> O <sub>18</sub> ]·10H <sub>2</sub> O                                                               |
| 280554        | 1.942 Å          | Nyburg, S. C.; Steed, J.; Aleksovskaja, S.; Petrushevski, V. M. <i>Acta Crystallogr., Sect. B</i> <b>2000</b> , <i>56</i> , 204.<br>Tl[Ga(H <sub>2</sub> O) <sub>6</sub> ](SO <sub>4</sub> ) <sub>2</sub> ·6H <sub>2</sub> O                                                                                                   |
| 96100         | 1.943 Å          | Kaziev, G. Z.; Quinones, S. O.; Bel'skii, V. K.; Zavodnik, V. E.; Osminkina, I. V. <i>Zh. Neorg. Khim.</i> <b>2002</b> , <i>47</i> , 18-22. [Ga(H <sub>2</sub> O) <sub>6</sub> ][Rh(OH) <sub>6</sub> Mo <sub>6</sub> O <sub>18</sub> ]·10H <sub>2</sub> O                                                                      |
| 95911         | 1.945 Å          | Kaziev, G. Z.; Quinones, H.; Bel'skii, V. K.; Zavodnik, V. E.; Osminkina, I. V.; de Ita, A. <i>Zh. Neorg. Khim.</i> <b>2002</b> , <i>47</i> , 389. [Ga(H <sub>2</sub> O) <sub>6</sub> ][Cr(OH) <sub>6</sub> Mo <sub>6</sub> O <sub>18</sub> ]·10H <sub>2</sub> O                                                               |
| 201216        | 1.945 Å          | Beattie, J. K.; Best, S. P.; Skelton, B. W.; White, A. H. <i>J. Chem. Soc., Dalton Trans.</i> <b>1981</b> , 2105.<br>Cs[Ga(H <sub>2</sub> O) <sub>6</sub> ](SO <sub>4</sub> ) <sub>2</sub> ·6H <sub>2</sub> O                                                                                                                  |
| 280553        | 1.945 Å          | Nyburg, S. C.; Steed, J.; Aleksovskaja, S.; Petrushevski, V. M. <i>Acta Crystallogr., Sect. B</i> <b>2000</b> , <i>56</i> , 204.<br>Rb[Ga(H <sub>2</sub> O) <sub>6</sub> ](SO <sub>4</sub> ) <sub>2</sub> ·6H <sub>2</sub> O                                                                                                   |
| 260248        | 1.946 Å          | Hendsbee, A. D.; Pye, C. C.; Masuda, J. D. <i>Acta Crystallogr., Sect. E</i> <b>2009</b> , <i>65</i> , i65.<br>[Ga(H <sub>2</sub> O) <sub>6</sub> ](NO <sub>3</sub> ) <sub>3</sub> ·3H <sub>2</sub> O                                                                                                                          |
| NABZIA        | 1.946 Å          | Dalgarno, S. J.; Hardie, M. J.; Raston, C. L. <i>Cryst. Growth Des.</i> <b>2004</b> , <i>4</i> , 227.<br>[Ga(H <sub>2</sub> O) <sub>6</sub> ] <sub>2</sub> (C <sub>12</sub> H <sub>28</sub> N <sub>2</sub> O <sub>4</sub> )(C <sub>28</sub> H <sub>20</sub> O <sub>16</sub> S <sub>4</sub> ) <sub>2</sub> ·20 H <sub>2</sub> O |
| MAQKEV        | 1.950 Å          | Gerasko, O. A.; Mainicheva, E. A.; Naumov, D. Yu.; Kuratieva, N. V.; Sokolov, M. N.; Fedin, V. P. <i>Inorg. Chem.</i> <b>2005</b> , <i>44</i> , 4133. [Ga(H <sub>2</sub> O) <sub>6</sub> ](NO <sub>3</sub> ) <sub>3</sub> ·13 H <sub>2</sub> O·C <sub>36</sub> H <sub>36</sub> N <sub>24</sub> O <sub>12</sub>                 |
| 110542        | 1.951 Å          | Pietraszko, A.; Lukaszewicz, K.; Kirpichnikova, L. F. <i>Pol. J. Chem.</i> <b>1995</b> , <i>69</i> , 922.<br>((CH <sub>3</sub> ) <sub>2</sub> NH <sub>2</sub> )[Ga(H <sub>2</sub> O) <sub>6</sub> ](SO <sub>4</sub> ) <sub>2</sub>                                                                                             |

|             |                              |                                                                                                                                                                                                                                                            |
|-------------|------------------------------|------------------------------------------------------------------------------------------------------------------------------------------------------------------------------------------------------------------------------------------------------------|
| REZXOJ      | 1.951 Å                      | Pietraszko, A.; Lukaszawicz, K.; Kiripichnikova, L. F. <i>Pol. J. Chem.</i> <b>1995</b> , <i>69</i> , 922.<br>((CH <sub>3</sub> ) <sub>2</sub> NH <sub>2</sub> )[Ga(H <sub>2</sub> O) <sub>6</sub> ](SO <sub>4</sub> ) <sub>2</sub>                        |
| 83654       | 1.969 Å                      | Panneerselvam, K.; Soriano-Garcia, M.; Holguin-Quinones, S.; Holt, E. M. <i>Acta Crystallogr., Sect C</i><br><b>1996</b> , <i>52</i> , 1605. [Ga(H <sub>2</sub> O) <sub>6</sub> ][Co(OH) <sub>6</sub> Mo <sub>6</sub> O <sub>18</sub> ]·10H <sub>2</sub> O |
| <b>Mean</b> | <b>1.946 Å/13 structures</b> |                                                                                                                                                                                                                                                            |



**Table S1ah.** Summary of solid state structures containing hydrated indium(III) ions. The ICSD/CDS code refers to the code in the Inorganic Crystal Structure Database (ICSD, number) and Cambridge Structure Database (CSD, letters), respectively, and the mean In-O bond distance,  $d(\text{In-O})$ .

### Indium(III)

#### *Six-coordination, octahedral configuration*

| ICSD/CSD code | $d(\text{In-O})$            | Reference, compound formula                                                                                                                                                                                                                             |
|---------------|-----------------------------|---------------------------------------------------------------------------------------------------------------------------------------------------------------------------------------------------------------------------------------------------------|
| 417334        | 2.107 Å                     | Ilyukhin, A. B.; Malyarik, M. A. <i>Zh. Neorg. Khim.</i> <b>1999</b> , <i>44</i> , 532-535. $[\text{In}(\text{H}_2\text{O})_6](\text{ClO}_4)_3$ .                                                                                                       |
| OLURUI        | 2.110 Å                     | Tian; Y.-Q.; Cai; C.-X.; Yuan; X.-J.; Li; Y.-Z.; Wang; T.-W.; You, X.-Z. <i>Chem. Lett.</i> <b>2003</b> , <i>32</i> , 796. $[\text{In}(\text{OH}_2)_6][\text{InC}_3\text{H}_{12}\text{N}_{12}\text{O}_{24}] \cdot 15\text{H}_2\text{O}$                 |
| 201217        | 2.112 Å                     | Beattie, J. K.; Best, S. P.; Skelton, B. W.; White, A. H. <i>J. Chem. Soc., Dalton Trans.</i> <b>1981</b> , 2105. $\text{Cs}[\text{In}(\text{OH}_2)_6](\text{SO}_4)_2 \cdot 6\text{H}_2\text{O}$ .                                                      |
| 429698        | 2.117 Å                     | Van, N.-D.; Kleeberg, F. M.; Schleid, T. Z. <i>Anorg. Allg. Chem.</i> <b>2015</b> , <i>641</i> , 2484. $[\text{In}(\text{H}_2\text{O})_6]\text{B}_{12}\text{H}_{12} \cdot 15\text{H}_2\text{O}$                                                         |
| LOHSOT        | 2.123 Å                     | Davidovich, R. L.; Gerasimenko, A. V.; Voit, E. I.; Logvinova, V. B. <i>J. Fluorine Chem.</i> <b>2019</b> , <i>226</i> , 109343. $((\text{CH}_3)_4\text{N})_6[\text{In}(\text{H}_2\text{O})_6][\text{InF}_6]_3 \cdot 18\text{H}_2\text{O}$              |
| 417333        | 2.124 Å                     | Ilyukhin, A. B.; Malyarik, M. A. <i>Zh. Neorg. Khim.</i> <b>1999</b> , <i>44</i> , 532-535. $[\text{In}(\text{H}_2\text{O})_6](\text{ClO}_4)_3 \cdot 3\text{H}_2\text{O}$ .                                                                             |
| 68912         | 2.135 Å                     | Armstrong, R. S.; Beattie, K. B.; Best, S. P.; Braithwaite, G.P. ; del Favero, P.; Skelton, B. W.; White, A. H. <i>Aust. J. Chem.</i> <b>1990</b> , <i>43</i> , 393. $\text{Cs}[\text{In}(\text{OH}_2)_6](\text{SeO}_4)_2 \cdot 6\text{H}_2\text{O}$ .  |
| OLURUI01      | 2.141 Å                     | Tian; Y.-Q.; Cai; C.-X.; Yuan; X.-J.; Li; Y.-Z.; Wang; T.-W.; You, X.-Z. <i>Chem. Lett.</i> <b>2003</b> , <i>32</i> , 796. $[\text{In}(\text{OH}_2)_6][\text{InC}_3\text{H}_{12}\text{N}_{12}\text{O}_{24}] \cdot 15\text{H}_2\text{O}$                 |
| GUMWIU        | 2.143 Å                     | Samsonenko, D. G.; Sokolov, M. N.; Virovets, A. V.; Pervukhina, N. V.; Fedin, V. P. <i>Eur. J. Inorg. Chem.</i> <b>2001</b> , 167. $[\text{In}(\text{OH}_2)_6](\text{NO}_3)_3 \cdot \text{C}_3\text{H}_3\text{N}_3\text{O}_3 \cdot 9\text{H}_2\text{O}$ |
| <b>Mean</b>   | <b>2.124 Å/9 structures</b> |                                                                                                                                                                                                                                                         |

**Table S1ai.** Summary of solid state structures containing hydrated thallium(III) ions. The ICSD/CDS code refers to the code in the Inorganic Crystal Structure Database (ICSD, number) and Cambridge Structure Database (CSD, letters), respectively, and the mean Tl-O bond distance,  $d(\text{Tl-O})$ .

### **Thallium(III)**

*Six-coordination, octahedral configuration*

| ICSD/CSD code | $d(\text{Tl-O})$           | Reference, compound formula                                                                                                    |
|---------------|----------------------------|--------------------------------------------------------------------------------------------------------------------------------|
| 31759         | 2.230 Å                    | Glaser, J.; Johansson, G. <i>Acta Chem. Scand., Ser. A</i> <b>1981</b> , 35, 639. $[\text{Tl}(\text{OH}_2)_6](\text{ClO}_4)_3$ |
| <b>Mean</b>   | <b>2.230 Å/1 structure</b> |                                                                                                                                |

**Table S1aj.** Summary of solid state structures containing hydrated a tin(II) ions. The ICSD/CDS code refers to the code in the Inorganic Crystal Structure Database (ICSD, number) and Cambridge Structure Database (CSD, letters), respectively, and the mean Sn-O bond distance,  $d(\text{Sn-O})$ .

### Tin(II) hydrates

#### *Three-coordination, three-leg configuration*

| ICSD/CSD code           | $d(\text{Sn-O})$                                      | Reference, compound formula, O-Sn-O angle                                                                                                                                                               |
|-------------------------|-------------------------------------------------------|---------------------------------------------------------------------------------------------------------------------------------------------------------------------------------------------------------|
| 237716                  | 2.200 Å                                               | Hennings, E.; Schmidt, H.; Köhler, M.; Voigt, W. <i>Acta Crystallogr., Sect. E</i> <b>2014</b> , 70, 474. [Sn(H <sub>2</sub> O) <sub>3</sub> ](ClO <sub>4</sub> ) <sub>2</sub> ;<br>O-Sn-O angle: 76.9° |
| FOSROW<br>253553        | 2.208 Å                                               | Persson, I.; D'Angelo, P.; Lundberg, D. <i>Chem. Eur. J.</i> <b>2016</b> , 22, 18583. [Sn(H <sub>2</sub> O) <sub>3</sub> ](ClO <sub>4</sub> ) <sub>2</sub> ; O-Sn-O angle: 77.8°                        |
| FOSROW01<br><b>Mean</b> | <b>2.204 Å; mean O-Sn-O angle: 77.4°/2 structures</b> |                                                                                                                                                                                                         |

**Table S1ak.** Summary of solid state structures containing hydrated a lead(II) ions. The ICSD/CDS code refers to the code in the Inorganic Crystal Structure Database (ICSD, number) and Cambridge Structure Database (CSD, letters), respectively, and the mean Pb-O bond distance,  $d(\text{Pb-O})$ .

### Lead(II)

#### *Three-coordination, three-leg configuration*

| ICSD/CSD code | $d(\text{Pb-O})$                                      | Reference, compound formula, O-Pb-O angle                                                                                                                                                                                                 |
|---------------|-------------------------------------------------------|-------------------------------------------------------------------------------------------------------------------------------------------------------------------------------------------------------------------------------------------|
| 422434        | 2.476 Å                                               | Tiritiris, I.; Nguyen-Duc, V.; Schleid, T. <i>Z. Anorg. Allg. Chem.</i> <b>2011</b> , 637, 882. $[\text{Pb}(\text{H}_2\text{O})_3]\text{B}_{12}\text{H}_{12}\cdot 3\text{H}_2\text{O}$ ; O-Pb-O angle: 75.7°                              |
| 431712        | 2.413 Å                                               | Zimmermann, Lucas W.; Kleeberg, Fabian M.; Schleid, T. <i>Z. Anorg. Allg. Chem.</i> <b>2017</b> , 643, 365. $[\text{Pb}(\text{H}_2\text{O})_3]_2\text{Pb}(\text{B}_{10}\text{H}_{10})_3\cdot 5.5\text{H}_2\text{O}$ ; O-Pb-O angle: 78.1° |
| 431713        | 2.431 Å                                               | Zimmermann, Lucas W.; Kleeberg, Fabian M.; Schleid, T. <i>Z. Anorg. Allg. Chem.</i> <b>2017</b> , 643, 365. $[\text{Pb}(\text{H}_2\text{O})_3]_2\text{Pb}(\text{B}_{10}\text{H}_{10})_3\cdot 1.5\text{H}_2\text{O}$ ; O-Pb-O angle: 78.1° |
| <b>Mean</b>   | <b>2.440 Å; mean O-Pb-O angle: 77.3°/3 structures</b> |                                                                                                                                                                                                                                           |

#### *Four-coordination, four-leg configuration*

| ICSD/CSD code | $d(\text{Pb-O})$           | Reference, compound formula, O-Pb-O angle                                                                                                                                                                 |
|---------------|----------------------------|-----------------------------------------------------------------------------------------------------------------------------------------------------------------------------------------------------------|
| TATVAO        | 2.400 Å                    | Thuery, P.; Harrowfield, J. <i>Inorg. Chem.</i> <b>2017</b> , 56, 1455. $[\text{Pb}(\text{H}_2\text{O})_4]_2[\text{U}_4\text{C}_{48}\text{H}_{60}\text{O}_{32}]$ ; O-Pb-O angle: 71.0°, 104.9° (diagonal) |
| <b>Mean</b>   | <b>2.400 Å/1 structure</b> |                                                                                                                                                                                                           |

**Table S1a1.** Summary of solid state structures containing hydrated a bismuth(III) ions. The ICSD/CDS code refers to the code in the Inorganic Crystal Structure Database (ICSD, number) and Cambridge Structure Database (CSD, letters), respectively, and the mean Bi-O bond distance,  $d(\text{Bi-O})$ ;  $d(\text{Bi-O})_p$  denotes ligands forming the prism and  $d(\text{Bi-O})_c$  the capping ligands in tricapped trigonal prismatic configuration.

### Bismuth(III)

*Nine-coordination, tricapped trigonal prism*

| ICSD/CSD code    | $d(\text{Bi-O})_p + d(\text{Bi-O})_c$              | Reference, compound formula                                                                                                                                |
|------------------|----------------------------------------------------|------------------------------------------------------------------------------------------------------------------------------------------------------------|
| ZEZTUT<br>290930 | 2.448 + 2.577 Å                                    | Frank, W.; Reiss, G. J.; Schneider, J. <i>Angew. Chem., Int. Ed.</i> <b>1995</b> , 34, 2416. $[\text{Bi}(\text{H}_2\text{O})_9](\text{CF}_3\text{SO}_3)_3$ |
| ZEZTUT01         | 2.433 + 2.587 Å                                    | Näslund, J.; Persson, I.; Sandström, M. <i>Inorg. Chem.</i> <b>2000</b> , 39, 4012. $[\text{Bi}(\text{H}_2\text{O})_9](\text{CF}_3\text{SO}_3)_3$          |
| <b>Mean</b>      | <b>2.440 + 2.582 Å/2 structures (mean 2.487 Å)</b> |                                                                                                                                                            |

**Table S1am.** Summary of solid state structures containing a hydrated titanium(III) or a solvated titanium(IV) ion. The ICSD/CDS code refers to the code in the Inorganic Crystal Structure Database (ICSD, number) and Cambridge Structure Database (CSD, letters), respectively, and the mean Ti-O bond distance,  $d(\text{Ti-O})$ ;  $d(\text{Ti-O})_{\text{O}}$  denotes binding to oxo groups,  $d(\text{Ti-O})_{\text{eq}}$  denotes the ligands in the equatorial plane versus the oxo group and  $d(\text{Ti-O})_{\text{ax}}$  denotes the ligand in the axial position versus the oxo group. Data in purple text are not included in the mean distance as they are uncertain or differ significantly from the mean value.

### Titanium(III)

*Six-coordination, octahedral configuration*

| ICSD/CSD code | $d(\text{Ti-O})$            | Reference, compound formula                                                                                                                                                                                                                                                            |
|---------------|-----------------------------|----------------------------------------------------------------------------------------------------------------------------------------------------------------------------------------------------------------------------------------------------------------------------------------|
| SIDHAR        | 1.998 Å                     | Zhu, B.-C.; Fang, W.-H.; Wang, J.; Du, Y.; Zhou, T.; Wu, K.; Zhang, L.; Zhang, J. <i>Chem. Eur. J.</i> <b>2018</b> , <i>24</i> , 14358. $[\text{Ti}(\text{H}_2\text{O})_6][\text{Ti}_8\text{C}_{84}\text{H}_{36}\text{O}_{48}] \cdot 2\text{CH}_3\text{CO}(\text{OCH}(\text{CH}_3)_2)$ |
| 2043          | 2.029 Å                     | Sygusch, J., <i>Acta Crystallogr., Sect B</i> <b>1974</b> , <i>30</i> , 662. $\text{Cs}[\text{Ti}(\text{H}_2\text{O})_6](\text{SO}_4)_3 \cdot 6\text{H}_2\text{O}$                                                                                                                     |
| LIMPUS        | 2.034 Å                     | Aquino, M. A. S.; Clegg, W.; Qiu-Tian Liu, Sykes, A. G., <i>Acta Crystallogr., Sect. C</i> <b>1995</b> , <i>52</i> , 560. $[\text{Ti}(\text{H}_2\text{O})_6](\text{C}_7\text{H}_7\text{SO}_3)_3 \cdot 3\text{H}_2\text{O}$                                                             |
| <b>Mean</b>   | <b>2.020 Å/3 structures</b> |                                                                                                                                                                                                                                                                                        |
| 165429        | 2.014 Å                     | Davis, P. H.; Wood, J. S. <i>Inorg. Chem.</i> <b>1970</b> , <i>9</i> , 1111. $[\text{Ti}(\text{OC}(\text{NH}_2)_2)_6]\text{I}_3$                                                                                                                                                       |
| 404087        | 2.033 Å                     | Troyanov, S. I.; Stiewe, A.; Kemnitz, E. <i>Z. Naturforsch., Teil B</i> <b>1996</b> , <i>51</i> , 19. $(\text{H}_5\text{O}_2)[\text{Ti}(\text{H}_2\text{O})_2(\text{OSO}_3)]_n$                                                                                                        |

### Oxotitanium(IV)/Titanyl(IV)

*Six-coordination, octahedral configuration*

| ICSD/CSD code | $d(\text{Ti-O})_{\text{O}} + d(\text{Ti-O})_{\text{eq}} + d(\text{Ti-O})_{\text{ax}}$ | Reference, compound formula                                                                                                                                |
|---------------|---------------------------------------------------------------------------------------|------------------------------------------------------------------------------------------------------------------------------------------------------------|
| RUKDIK        | 1.646 + 2.033 + 2.232 Å                                                               | Rabe, S.; Muller, U., <i>Z. Naturforsch., Teil B</i> <b>1997</b> , <i>52</i> , 1291. $[\text{TiO}(\text{OS}(\text{CH}_3)_2)_5]\text{Cl}_2$                 |
| RUKDIK01      | 1.648 + 2.035 + 2.234 Å                                                               | Enders, M.; Rudolph, R.; Pritzkow, H., <i>Z. Naturforsch., Teil B</i> <b>1997</b> , <i>52</i> , 496. $[\text{TiO}(\text{OS}(\text{CH}_3)_2)_5]\text{Cl}_2$ |
| <b>Mean</b>   | <b>1.647 + 2.034 + 2.233 Å/2 structures</b>                                           |                                                                                                                                                            |

**Table S1an.** Summary of solid state structures containing hydrated zirconium(IV) and hafnium(IV) hydroxo complexes,  $[M_4(OH)_8(H_2O)_{16}]^{8+}$ . The ICSD/CDS code refers to the code in the Inorganic Crystal Structure Database (ICSD, number) and Cambridge Structure Database (CSD, letters), respectively, and the mean M-O bond distance,  $d(M-O)_{aq}$  and  $d(Ti-O)_{OH}$  denotes binding to oxo groups.

### Zirconium(IV)

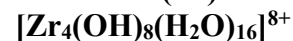

ICSD/CSD code  $d(Zr-O)_{OH} + d(Zr-O)_{aq}/d(Zr \cdots Zr)$  Reference, compound formula

IBAZER 2.126 + 2.267 Å Mit'kina, T. V.; Geras'ko, O. A.; Sokolov, M. N.; Naumov, D. Y.; Fedin, V. P. *Izv. Akad. Nauk SSSR, Ser. Khim.* **2008**, 80.  $[Zr_4(OH)_8(H_2O)_{16}]Cl_8 \cdot (C_{36}H_{36}N_{24}O_{16}) \cdot 16H_2O$

**Mean 2.126 + 2.267 Å/1 structure**

### Hafnium(IV)

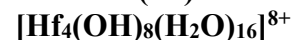

ICSD/CSD code  $d(Hf-O)_{OH} + d(Hf-O)_{aq}/d(Hf \cdots Hf)$

IBAZIV 2.119 + 2.241 Å Mit'kina, T. V.; Geras'ko, O. A.; Sokolov, M. N.; Naumov, D. Y.; Fedin, V. P. *Izv. Akad. Nauk SSSR, Ser. Khim.* **2008**, 80.  $[Hf_4(OH)_8(H_2O)_{16}](CH_3C_6H_4SO_3)_8 \cdot 4H_2O$

PEWNAH 2.130 + 2.268 Å Dalgarno, S. J.; Atwood, J. L.; Raston, C. L. *Inorg. Chim. Acta* **2007**, 360, 1344.  $[Hf_4(OH)_8(H_2O)_{16}](CH_3C_6H_4SO_3)_8 \cdot 4H_2O$

**Mean 2.125 + 2.250 Å/2 structures**

**Table S1ao.** Summary of solid state structures containing hydrated vanadium(II), vanadium(III) or oxovanadium(IV)/vanadyl(IV) ions. The ICSD/CDS code refers to the code in the Inorganic Crystal Structure Database (ICSD, number) and Cambridge Structure Database (CSD, letters), respectively, and the mean V-O bond distance,  $d(\text{V-O})$ ;  $d(\text{V-O})_{\text{o}}$  denotes binding to oxo groups,  $d(\text{V-O})_{\text{eq}}$  denotes the ligands in the equatorial plane versus the oxo group and  $d(\text{V-O})_{\text{ax}}$  denotes the ligand in the axial position versus the oxo group. Data in purple text are not included in the mean distance as they are uncertain or differ significantly from the mean value.

## Vanadium(II)

*Six-coordination, octahedral configuration*

| ICSD/CSD code | $d(\text{V-O})$             | Reference, compound formula                                                                                                                                                                                                                                                                   |
|---------------|-----------------------------|-----------------------------------------------------------------------------------------------------------------------------------------------------------------------------------------------------------------------------------------------------------------------------------------------|
| YEGSAF        | 1.958 Å                     | Wei Shi, Xiao-Yan Chen, Bin Zhao, Ao Yu, Hai-Bin Song, Peng Cheng, Hong-Gen Wang, Dai-Zheng Liao, Shi-Ping Yan, <i>Inorg. Chem.</i> <b>2006</b> , <i>45</i> , 3949. $[\text{V}(\text{H}_2\text{O})_6][\text{V}_2\text{C}_{18}\text{H}_{24}\text{N}_4\text{O}_{14}] \cdot 4\text{H}_2\text{O}$ |
| 15232         | 2.053 Å                     | Kutoglu, A., <i>Z. Kristallograph., Kristallgeom., Kristallphys., Kristallchem.</i> <b>1973</b> , <i>137</i> , 51. $[\text{V}(\text{H}_2\text{O})_6]_3[\text{Ni}(\text{H}_2\text{O})_6](\text{SO}_4)_4$                                                                                       |
| 68779         | 2.118 Å                     | Holt, D. G. L.; Larkworthy, L. F.; Povey, D. C.; Smith, G. W.; Jeffery Leigh, G., <i>Inorg. Chim. Acta</i> <b>1990</b> , <i>169</i> , 201. $[\text{V}(\text{H}_2\text{O})_6](\text{CF}_3\text{SO}_3)_2$                                                                                       |
| 75461         | 2.129 Å                     | Cotton, F. A.; Falvello, L. R.; Murillo, C. A.; Pascual, I.; Schultz, A. J.; Tomas, M., <i>Inorg. Chem.</i> <b>1994</b> , <i>33</i> , 5391. $[\text{V}(\text{H}_2\text{O})_6]\text{SO}_4 \cdot \text{H}_2\text{O}$                                                                            |
| 61263         | 2.130 Å                     | Cotton, F. A.; Falvello, L. R.; Llusar, R.; Libby, E.; Murillo, C. A.; Schwotzer, W., <i>Inorg. Chem.</i> <b>1986</b> , <i>25</i> , 3423. $[\text{V}(\text{H}_2\text{O})_6]\text{SO}_4$                                                                                                       |
| 14345         | 2.148 Å                     | Montgomery, H.; Chastain, R. V.; Natt, J. J.; Witkowska, A. M.; Lingafelter, E. C., <i>Acta Crystallogr.</i> <b>1967</b> , <i>22</i> , 775. $[\text{V}(\text{H}_2\text{O})_6](\text{NH}_4)_2(\text{SO}_4)_2$                                                                                  |
| <b>Mean</b>   | <b>2.131 Å/4 structures</b> |                                                                                                                                                                                                                                                                                               |



## Vanadium(III)

*Six-coordination, octahedral configuration*

| ICSD/CSD code | $d(\text{V-O})$             | Reference, compound formula                                                                                                                                                                                                                                                 |
|---------------|-----------------------------|-----------------------------------------------------------------------------------------------------------------------------------------------------------------------------------------------------------------------------------------------------------------------------|
| FEMHOV        | 1.988 Å                     | Tregenna-Piggott, P. L. W.; Spichiger, D.; Carver, G.; Frey, B.; Meier, R.; Weihe, H.; Cowan, J. A.; McIntyre, G. J.; Zahn, G.; Barra, A.-L. <i>Inorg. Chem.</i> <b>2004</b> , <i>43</i> , 8049. $[\text{V}(\text{H}_2\text{O})_6](\text{C}(\text{NH}_2)_3)(\text{SO}_4)_2$ |
| 81830         | 1.991 Å                     | Beattie, J. K.; Best, S. P.; del Favero, P.; Skelton, B. W.; Sobolev, A. N.; White, A. H. <i>J. Chem. Soc., Dalton Trans.</i> , <b>1996</b> , 1481. $\text{K}[\text{V}(\text{H}_2\text{O})_6](\text{SO}_4)_2 \cdot 6\text{H}_2\text{O}$                                     |
| 81832         | 1.991 Å                     | Beattie, J. K.; Best, S. P.; del Favero, P.; Skelton, B. W.; Sobolev, A. N.; White, A. H. <i>J. Chem. Soc., Dalton Trans.</i> , <b>1996</b> , 1481. $\text{Cs}[\text{V}(\text{H}_2\text{O})_6](\text{SO}_4)_2 \cdot 6\text{H}_2\text{O}$                                    |
| 201210        | 1.993 Å                     | Beattie, J. K.; Best, S. P.; Skelton, B. W.; White, A. H. <i>J. Chem. Soc., Dalton Trans.</i> <b>1981</b> , 2105-2111. $\text{Cs}[\text{V}(\text{H}_2\text{O})_6](\text{SO}_4)_2 \cdot 6\text{H}_2\text{O}$                                                                 |
| COLNUM        | 1.995 Å                     | Cotton, F. A.; Fair, C. K.; Lewis, G. E.; Mott, G. N.; Ross, F. K.; Schultz, A. J.; Williams, J. M. <i>J. Am. Chem. Soc.</i> <b>1984</b> , <i>106</i> , 5319. $[\text{V}(\text{H}_2\text{O})_6](\text{H}_5\text{O}_2)(\text{CF}_3\text{SO}_3)_4$                            |
| 81831         | 1.996 Å                     | Beattie, J. K.; Best, S. P.; del Favero, P.; Skelton, B. W.; Sobolev, A. N.; White, A. H., <i>J. Chem. Soc., Dalton Trans.</i> <b>1996</b> , 1481. $\text{Rb}[\text{V}(\text{H}_2\text{O})_6](\text{SO}_4)_2 \cdot 6\text{H}_2\text{O}$                                     |
| 74004         | 2.007 Å                     | Beattie, J. K.; Best, S. P.; Moore, F. H.; Skelton, B. W.; White, A. H., <i>Aust. J. Chem.</i> <b>1993</b> , <i>46</i> , 1337. $\text{Cs}[\text{V}(\text{H}_2\text{O})_6](\text{SO}_4)_2 \cdot 6\text{H}_2\text{O}$                                                         |
| <b>Mean</b>   | <b>1.994 Å/7 structures</b> |                                                                                                                                                                                                                                                                             |

## Oxovanadium(IV)/Vanadyl(IV)

### Six-coordinated (pentahydration)

| ICSD/CSD code | $d(\text{V-O})_{\text{O}} + d(\text{V-O})_{\text{eq}} + d(\text{V-O})_{\text{ax}}$ | Reference, compound formula                                                                                                                                                                                                                                    |
|---------------|------------------------------------------------------------------------------------|----------------------------------------------------------------------------------------------------------------------------------------------------------------------------------------------------------------------------------------------------------------|
| ZEWXOR        | 1.569 + 2.021 + 2.184 Å                                                            | Hadzovic. A., unpublished data, CCDC code1832273, <b>2018</b> .                                                                                                                                                                                                |
| SIBGEO01      | 1.569 + 2.027 + 2.183 Å                                                            | Krakowiak, J.; Lundberg, D.; Persson, I. <i>Inorg. Chem.</i> <b>2012</b> , <i>51</i> , 9598. $[\text{VO}(\text{H}_2\text{O})_5](\text{CF}_3\text{SO}_3)_2$                                                                                                     |
| 51489         | 1.571 + 2.030 + 2.210 Å                                                            | Teze, A.; Marchal-Roch, C.; So, H.; Fournier, M. T.; Herve, G., <i>Solid State Sci.</i> <b>2001</b> , <i>3</i> , 329.<br>$[\text{Na}(\text{H}_2\text{O})_2]_2[\text{VO}(\text{H}_2\text{O})_5][\text{SiW}_{12}\text{O}_{40}] \cdot 4\text{H}_2\text{O}$        |
| OBUZUH        | 1.576 + 2.037 + 2.171 Å                                                            | Lianzhi Li, Tao Xu, Daqi Wang, Meiju Niu, <i>Acta Crystallogr., Sect. E</i> <b>2004</b> , <i>60</i> , m1374.<br>$[\text{VO}(\text{H}_2\text{O})_5](\text{C}_7\text{H}_5\text{SO}_6) \cdot 2\text{H}_2\text{O}$                                                 |
| LEYMIL        | 1.577 + 2.026 + 2.177 Å                                                            | De Munno, G.; Bazzicalupi, C.; Faus, J.; Lloret, F.; Julve, M., <i>J. Chem. Soc., Dalton Trans.</i> <b>1994</b> , o1879. $[\text{VO}(\text{H}_2\text{O})_5][\text{Cu}_2\text{C}_{16}\text{H}_{14}\text{N}_8\text{O}_{13}\text{S}_3] \cdot 7\text{H}_2\text{O}$ |
| SIBGEO        | 1.577 + 2.027 + 2.175 Å                                                            | Magnussen, M.; Brock-Nannestad, T.; Bendix, J. <i>Acta Crystallogr., Sect. E</i> <b>2007</b> , <i>63</i> , m51.<br>$[\text{VO}(\text{H}_2\text{O})_5](\text{CF}_3\text{SO}_3)_2$                                                                               |
| 92978         | 1.582 + 2.027 + 2.231 Å                                                            | Hawthorne, F. C.; Schindler, M.; Grice, J. D.; Haynes, P., <i>Can. Miner.</i> <b>2001</b> , <i>39</i> , 1325.<br>$[\text{VO}(\text{H}_2\text{O})_5]\text{SO}_4$                                                                                                |
| 10433         | 1.586 + 2.019 + 2.160 Å                                                            | Tachez, M.; Theobald, F. R., <i>Acta Crystallogr., Sect. B</i> <b>1980</b> , <i>36</i> , 249. $[\text{VO}(\text{H}_2\text{O})_5]\text{SO}_4 \cdot \text{H}_2\text{O}$                                                                                          |
| 23308         | 1.591 + 2.024 + 2.217 Å                                                            | Tachez, M.; Theobald, F. R., <i>Acta Crystallogr. Sect. B</i> <b>1980</b> , <i>36</i> , 1757. $[\text{VO}(\text{H}_2\text{O})_5]\text{SO}_4$                                                                                                                   |
| 69125         | 1.599 + 2.022 + 2.161 Å                                                            | Hjorth, M.; Norrestam, R.; Johansen, H., <i>Acta Crystallogr., Sect B</i> <b>1990</b> , <i>46</i> , 1.<br>$[\text{VO}(\text{H}_2\text{O})_5]\text{SO}_4 \cdot \text{H}_2\text{O}$                                                                              |
| <b>Mean</b>   | <b>1x1.580, 4x2.026, 1x2.187 Å/10 structures</b>                                   |                                                                                                                                                                                                                                                                |

**Table S1ap.** Summary of solid state structures containing hydrated chromium(II), chromium(III) and molybdenum(III) ions. The ICSD/CDS code refers to the code in the Inorganic Crystal Structure Database (ICSD, number) and Cambridge Structure Database (CSD, letters), respectively, and the mean Cr/Mo-O bond distance,  $d(\text{Cr/Mo-O})$ . Data in purple text are not included in the mean distance as they are uncertain or differ significantly from the mean value.

### Chromium(II)

*Six-coordination, Jahn-Teller distorted octahedral configuration*

| ICSD/CSD code | $d(\text{Cr-O})$                                                      | Reference, compound formula                                                                                                                                                                                                     |
|---------------|-----------------------------------------------------------------------|---------------------------------------------------------------------------------------------------------------------------------------------------------------------------------------------------------------------------------|
| 80638         | 2.106 Å                                                               | Cotton, F. A.; Falvello, L. R.; Murillo, C. A.; Quesada, J. F. <i>J. Solid State Chem.</i> <b>1992</b> , 96, 192.<br>[Cr(H <sub>2</sub> O) <sub>6</sub> ] <sub>2</sub> SiF <sub>6</sub>                                         |
| 108844        | 2.080 + 2.341 Å                                                       | Figgis, B. N.; Kucharski, E. S.; Reynolds, P. A. <i>Acta Crystallogr. Sect. B</i> <b>1990</b> , 46, 577.<br>(NH <sub>4</sub> ) <sub>2</sub> [Cr(H <sub>2</sub> O) <sub>6</sub> ](SO <sub>4</sub> ) <sub>2</sub>                 |
| 41344         | 2.086 + 2.324 Å                                                       | Araya, M. A.; Cotton, F. A.; Daniels, M. N.; Falvello, L. R.; Murillo, C. A. <i>Inorg. Chem.</i> <b>1993</b> , 32, 4853.<br>(NH <sub>4</sub> ) <sub>2</sub> [Cr(H <sub>2</sub> O) <sub>6</sub> ](SO <sub>4</sub> ) <sub>2</sub> |
| <b>Mean</b>   | <b>2.083 + 2.333 Å/2 structures; mean Cr-O bond distance: 2.166 Å</b> |                                                                                                                                                                                                                                 |

*Six-coordination, regular octahedral configuration*

| ICSD/CSD code | $d(\text{Cr-O})$ | Reference, compound formula                                                                                                                                                                                            |
|---------------|------------------|------------------------------------------------------------------------------------------------------------------------------------------------------------------------------------------------------------------------|
| 80638         | 2.106 Å          | Cotton, F. A.; Falvello, L. R.; Murillo, C. A.; Quesada, J. F. <i>J. Solid State Chem.</i> <b>1992</b> , 96, 192.<br>[Cr(H <sub>2</sub> O) <sub>6</sub> ] <sub>2</sub> SiF <sub>6</sub>                                |
| 62364         | 2.049 + 2.435 Å  | Ito, H.; Ito, Y.; Kanamaru, F.; Koto, K. <i>Z. Kristallogr.</i> <b>1987</b> , 181, 99.<br>Cr(SO <sub>4</sub> ) <sub>2</sub> ·5H <sub>2</sub> O                                                                         |
| 62753         | 2.047 + 2.441 Å  | Hitchman, M. A.; Lichon, M.; McDonald, R. G.; Smith, P. W.; Stranger, R.; Skelton, B. W.; White, A. H. <i>J. Chem. Soc., Dalton Trans.</i> <b>1987</b> , 1817.<br>Cr(SO <sub>4</sub> ) <sub>2</sub> ·5H <sub>2</sub> O |

### Chromium(III)

*Six-coordination, octahedral configuration*

| ICSD/CSD code | $d(\text{Cr-O})$ | Reference, compound formula                                                                                                                                                                                  |
|---------------|------------------|--------------------------------------------------------------------------------------------------------------------------------------------------------------------------------------------------------------|
| 34262         | 1.955 Å          | Schein, B. J. B.; Lingafelter, E. C.; Stewart, J. M. <i>J. Chem. Phys.</i> <b>1967</b> , 47, 5183.<br>(C(NH <sub>2</sub> ) <sub>3</sub> )[Cr(H <sub>2</sub> O) <sub>6</sub> ](SO <sub>4</sub> ) <sub>2</sub> |
| QUXWAI        | 1.956 Å          | Mariam, I.; Rauf, A.; Sharif, S.; Khan, I. U.; Ng, S. W. <i>Acta Crystallogr., Sect. E</i> <b>2010</b> , 66, m843.                                                                                           |

|                  |         |                                                                                                                                                                                                                                                                                                                                     |
|------------------|---------|-------------------------------------------------------------------------------------------------------------------------------------------------------------------------------------------------------------------------------------------------------------------------------------------------------------------------------------|
| 2379             | 1.957 Å | Epple, M.; Massa, W. <i>Z. Anorg. Allg. Chem.</i> <b>1978</b> , <i>444</i> , 47-53. $[\text{Cr}(\text{H}_2\text{O})_6]\text{F}_3 \cdot 3\text{H}_2\text{O}$ .                                                                                                                                                                       |
| RUNMOF           | 1.959 Å | Kohn, R. D.; Coxon, A. G. N.; Chunawat, S.; Heron, C.; Mihan, S.; Lyall, C. L.; Reeksting, S. B.; Kociok-Kohn, G. <i>Polyhedron</i> <b>2020</b> , <i>185</i> , 114572. $[\text{Cr}(\text{H}_2\text{O})_6](\text{CF}_3\text{SO}_3)_3 \cdot 3\text{H}_2\text{O}$                                                                      |
| TAPBUH<br>110573 | 1.960 Å | Galesic, N.; Jordanovska, V. B. <i>Acta Crystallogr., Sect. C</i> <b>1992</b> , <i>48</i> , 256. $(\text{NH}_2(\text{CH}_3)_2)[\text{Cr}(\text{H}_2\text{O})_6]_2(\text{SO}_4)_2$                                                                                                                                                   |
| 424987           | 1.961 Å | Rees-Isele, L.; Keller, E. <i>Z. Naturforsch., Teil B</i> <b>2012</b> , <i>67</i> , 1229. $\text{Na}[\text{Cr}(\text{H}_2\text{O})_6](\text{SO}_4)_2$                                                                                                                                                                               |
| 143461           | 1.962 Å | Weil, M. <i>Chem.</i> <b>2021</b> , <i>3</i> , 45. $\text{NH}_4[\text{Cr}(\text{H}_2\text{O})_6](\text{PO}_3\text{F})_2$                                                                                                                                                                                                            |
| 429697           | 1.962 Å | Van, N.-D.; Kleeberg, F. M.; Schleid, T. <i>Z. Anorg. Allg. Chem.</i> <b>2015</b> , <i>641</i> , 2484. $[\text{Cr}(\text{H}_2\text{O})_6](\text{B}_{12}\text{H}_{12})\text{Cl}_3 \cdot 15\text{H}_2\text{O}$                                                                                                                        |
| AXOCIB           | 1.962 Å | Oelkers, B.; Schaffner, D.; Sun, Y. <i>Chem. Sel.</i> <b>2016</b> , <i>1</i> , 4440.                                                                                                                                                                                                                                                |
| TIZMIA<br>426368 | 1.962 Å | Rees-Isele, L.; Winkler, H.-P.; Keller, E. <i>Z. Naturforsch., Teil B</i> <b>2013</b> , <i>68</i> , 1288. $\text{Na}[\text{Cr}(\text{H}_2\text{O})_6](\text{SO}_4)_2 \cdot 0.6\text{CH}_3\text{OH} \cdot 1.5\text{H}_2\text{O}$                                                                                                     |
| HSQCRB           | 1.962 Å | Chesick, J. P.; Doany, F. <i>Acta Crystallogr., Sect. B</i> <b>1981</b> , <i>37</i> , 1076. $[\text{Cr}(\text{H}_2\text{O})_6]_2(\text{C}_4\text{O}_4)_3 \cdot 3\text{H}_2\text{O}$                                                                                                                                                 |
| AQEMUF           | 1.963 Å | Xing, Q.-J.; Dai, S. C.; Chen, M.-H.; Ma, J.; Zhang, L.-P.; Zou, J.-P. <i>Z. Kristallogr. - New Cryst. Struct.</i> <b>2011</b> , <i>226</i> , 67.                                                                                                                                                                                   |
| PUYHIC           | 1.963 Å | JQiu, J.-Z.; Wang, L.-F.; Chen, Y.-C.; Zhang, Z.-M.; Li, Q.-W.; Tong, M.-L. <i>Chem. Eur. J.</i> <b>2016</b> , <i>22</i> , 802.                                                                                                                                                                                                     |
| VOYYAJ           | 1.963 Å | Atwood, J. L.; Orr, G. W.; Means, N. C.; Hamada, F.; Hongming Zhang; Bott, S.G.; Robinson, K. D. <i>Inorg. Chem.</i> <b>1992</b> , <i>31</i> , 603. $[\text{Cr}(\text{H}_2\text{O})_6](\text{NaC}_{28}\text{H}_{28}\text{O}_{20}\text{S}_4) \cdot (\text{CH}_3)_2\text{CO} \cdot 6.5\text{H}_2\text{O}$                             |
| ITUTIA           | 1.964 Å | Samsonenko, D. G.; Geras'ko, O. A.; Mit'kina, T. V.; Lipkowski, J.; Virovets, A. V.; Fenske, D.; Fedin, V. P. <i>Koord. Khim. (Russ. J. Coord. Chem.)</i> <b>2003</b> , <i>29</i> , 166. $[\text{Cr}(\text{H}_2\text{O})_6]_2(\text{NO}_3)_3 \cdot 13\text{H}_2\text{O} \cdot \text{C}_{36}\text{H}_{36}\text{N}_{24}\text{O}_{12}$ |
| MEWZET01         | 1.964 Å | Dalrymple, S. A.; Parvez, M.; Shimizu, G. K. H. <i>Inorg. Chem.</i> <b>2002</b> , <i>41</i> , 6986. $[\text{Cr}(\text{H}_2\text{O})_6]_2(\text{C}_9\text{H}_9\text{O}_9\text{S}_3) \cdot 3\text{CH}_3\text{OH}$                                                                                                                     |
| 1265             | 1.966 Å | Massa, W. <i>Z. Anorg. Allg. Chem.</i> <b>1977</b> , <i>436</i> , 29. $(\text{NH}_4)_2[\text{Cr}(\text{H}_2\text{O})_6]\text{F}_5$                                                                                                                                                                                                  |
| 38266            | 1.966 Å | Marsh, R. E.; Herstein, F. H. <i>Acta Crystallogr., Sect. B</i> <b>1983</b> , <i>39</i> , 280. $(\text{NH}_4)_2[\text{Cr}(\text{H}_2\text{O})_6]\text{F}_5$                                                                                                                                                                         |
| 66000            | 1.966 Å | Spundflasche, E.; Fink, H.; Seifert, H. J. <i>Z. Anorg. Allg. Chem.</i> <b>1989</b> , <i>579</i> , 143. $[\text{Cr}(\text{H}_2\text{O})_6]\text{Cl}_3$                                                                                                                                                                              |
| 69551            | 1.966 Å | Lazar, D.; Ribar, B.; Divjakovic, V.; Meszaros, C. <i>Acta Crystallogr., Sect. C</i> <b>1991</b> , <i>47</i> , 1060. $[\text{Cr}(\text{H}_2\text{O})_6](\text{NO}_3)_3 \cdot 3\text{H}_2\text{O}$ .                                                                                                                                 |
| XESXUY           | 1.966 Å | Taylor, J. M.; Dwyer, P. J.; Reid, J. W.; Gelfand, B. S.; Lim, D.-w.; Donoshita, M.; Veinberg, S. L.; Kitagawa, H.; Vukotic, V. N.; Shimizu, G. K. H. <i>Chem Cell mPress</i> <b>2018</b> , <i>4</i> , 868.                                                                                                                         |
| UCOME E          | 1.966 Å | Eshel, M.; Bino, A. <i>Inorg. Chim. Acta</i> <b>2001</b> , <i>320</i> , 127-132. $[\text{Cr}(\text{H}_2\text{O})_6]_2(\text{CH}_3\text{COO})_3$                                                                                                                                                                                     |
| XESYAF           | 1.967 Å | Taylor, J. M.; Dwyer, P. J.; Reid, J. W.; Gelfand, B. S.; Lim, D.-W.; Donoshita, M.; Veinberg, S. L.; Kitagawa, H.; Vukotic, V. N.; Shimizu, G. K. H. <i>Chem Cell mPress</i> <b>2018</b> , <i>4</i> , 868.                                                                                                                         |
| 26138            | 1.968 Å | Andress, K. R.; Carpenter, C. <i>Z. Kristallogr.</i> <b>1934</b> , <i>87</i> , 446. $[\text{Cr}(\text{H}_2\text{O})_6]\text{Cl}_3$                                                                                                                                                                                                  |

|             |                              |                                                                                                                                                                                                                                                                                                                                                                        |
|-------------|------------------------------|------------------------------------------------------------------------------------------------------------------------------------------------------------------------------------------------------------------------------------------------------------------------------------------------------------------------------------------------------------------------|
| IWOJOT      | 1.969 Å                      | Shan Gao; Ji-Wei Liu; Li-Hua Huo; Hui Zhao; Jing-Gui Zhao <i>Acta Crystallogr., Sect. E</i> <b>2004</b> , <i>60</i> , m622.<br>[Cr(H <sub>2</sub> O) <sub>6</sub> ] <sub>2</sub> (NaC <sub>22</sub> H <sub>20</sub> O <sub>15</sub> )·5H <sub>2</sub> O                                                                                                                |
| XEZXS       | 1.970 Å                      | Taylor, J. M.; Dwyer, P. J.; Reid, J. W.; Gelfand, B. S.; Lim, D.-W.; Donoshita, M.; Veinberg, S. L.; Kitagawa, H.; Vukotic, V. N.; Shimizu, G. K. H. <i>Chem Cell mPress</i> <b>2018</b> , <i>4</i> , 868.<br>[Cr(H <sub>2</sub> O) <sub>6</sub> ] <sub>2</sub> ((C <sub>6</sub> H <sub>5</sub> )O <sub>2</sub> POHOPO <sub>2</sub> (C <sub>6</sub> H <sub>5</sub> )) |
| DOJGAL      | 1.971 Å                      | Aridomi, T.; Takamura, K.; Igashira-Kamiyama, A.; Kawamoto, T.; Konno, T. <i>Chem. Eur. J.</i> <b>2008</b> , <i>14</i> , 7752.                                                                                                                                                                                                                                         |
| 52531       | 1.972 Å                      | Rodek, E.; Sterzel, W.; Theile, N. <i>Z. Anorg. Allg. Chem.</i> <b>1980</b> , <i>462</i> , 42. [Cr(H <sub>2</sub> O) <sub>6</sub> ]PO <sub>4</sub>                                                                                                                                                                                                                     |
| YEPZUR      | 1.986 Å                      | Oya, N.; Yamada, M.; Surinwong, S.; Kuwamura, N.; Konno, T. <i>Dalton Trans.</i> <b>2018</b> , <i>27</i> , 2497.                                                                                                                                                                                                                                                       |
| OLUROC      | 2.015 Å                      | Tian, Y.-Q.; Cai, C.-X.; X.-J.; Li, Y.-Z.; Wang, T.-W.; You, X.-Z. <i>Chem. Lett.</i> <b>2003</b> , <i>32</i> , 796.<br>[Cr(H <sub>2</sub> O) <sub>6</sub> ][InC <sub>36</sub> H <sub>12</sub> N <sub>12</sub> O <sub>24</sub> ]·15H <sub>2</sub> O                                                                                                                    |
| <b>Mean</b> | <b>1.965 Å/24 structures</b> |                                                                                                                                                                                                                                                                                                                                                                        |

### Molybdenum(III)

*Six-coordination, octahedral configuration*

| ICSD/CSD code | <i>d</i> (Mo-O) | Reference, compound formula                                                                                                                                                                                                                                                                                            |
|---------------|-----------------|------------------------------------------------------------------------------------------------------------------------------------------------------------------------------------------------------------------------------------------------------------------------------------------------------------------------|
| 62552         | 2.089 Å         | Brorson, M.; Gajhede, M. Crystal structure of cesium molybdenum alum, Cs[Mo(H <sub>2</sub> O) <sub>6</sub> ](SO <sub>4</sub> ) <sub>2</sub> ·6H <sub>2</sub> O, at 110 K. <i>Inorg. Chem.</i> <b>1987</b> , <i>26</i> , 2109. Cs[Mo(H <sub>2</sub> O) <sub>6</sub> ](SO <sub>4</sub> ) <sub>2</sub> ·6H <sub>2</sub> O |

**Table S1aq.** Summary of solid state structures containing hydrated manganese(II) and manganese(III) ions. The ICSD/CDS code refers to the code in the Inorganic Crystal Structure Database (ICSD, number) and Cambridge Structure Database (CSD, letters), respectively, and the mean Mn-O bond distance,  $d(\text{Mn-O})$ . Data in purple text are not included in the mean distance as they are uncertain or differ significantly from the mean value.

## Manganese(II)

### *Six-coordination, octahedral configuration*

| ICSD/CSD code | $d(\text{Mn-O})$ | Reference, compound formula                                                                                                                                                                                                                                                                       |
|---------------|------------------|---------------------------------------------------------------------------------------------------------------------------------------------------------------------------------------------------------------------------------------------------------------------------------------------------|
| CONBEO        | 2.143 Å          | Jia, T.-J.; Li, S.-M.; Cao, W.; Li, L.-C.; Zheng, X.-J.; Yuan, D.-Q. <i>J. Solid State Chem.</i> <b>2013</b> , <i>201</i> , 208. $[\text{Mn}(\text{H}_2\text{O})_6][\text{Cu}_2\text{MnC}_{16}\text{H}_{12}\text{O}_{20}] \cdot 4\text{H}_2\text{O}$                                              |
| FURWEV        | 2.146 Å          | Leong, W. L.; Vittal, J. J. <i>Inorg. Chim. Acta</i> <b>2009</b> , <i>362</i> , 2189. $[\text{Mn}(\text{H}_2\text{O})_6][\text{Mn}_2\text{C}_{30}\text{H}_{28}\text{N}_2\text{O}_{16}]_2 \cdot 2\text{CH}_3\text{CN}$                                                                             |
| FAXFEQ        | 2.147 Å          | Ma, Z.; Tao, J.; Huang, R.-B.; Zhang, L.-S. <i>Acta Crystallogr., Sect. E</i> <b>2005</b> , <i>61</i> , m1. $[\text{Mn}(\text{H}_2\text{O})_6](\text{C}_8\text{H}_4\text{N}_5)_2$                                                                                                                 |
| NUVWOR        | 2.148 Å          | Wang, Y.; Zhang, Z.-J.; Shi, W.; Cheng, P.; Liao, D.-Z.; Yan, S. P. <i>CrystEngComm</i> <b>2010</b> , <i>12</i> , 1086. $[\text{Mn}(\text{H}_2\text{O})_6][\text{Mn}_2\text{La}_2\text{C}_{24}\text{H}_{24}\text{O}_{30}] \cdot 3\text{H}_2\text{O}$                                              |
| TITNAM        | 2.149 Å          | Liu, C.; Shi, X.; Du, B.; Wu, C.; Zhang, M. <i>Acta Crystallogr., Sect. E</i> <b>2008</b> , <i>64</i> , m270. $[\text{Mn}(\text{H}_2\text{O})_6](\text{C}_6\text{H}_2\text{N}_3\text{O}_7)_2 \cdot 2\text{H}_2\text{O}$                                                                           |
| 59274         | 2.151 Å          | Torii, A.; Ogawa, K.; Tamura, H.; Osaki, K. <i>Acta Crystallogr., Sect. C</i> <b>1997</b> , <i>53</i> , 833. $[\text{Mn}(\text{H}_2\text{O})_6]\text{SiF}_6$                                                                                                                                      |
| ORINAF        | 2.151 Å          | Wei, M.-L.; Zhuang, P.-F.; Miao, Q.-Z.; Wang, Y. <i>J. Solid State Chem.</i> <b>2011</b> , <i>184</i> , 1472. $[\text{Mn}(\text{H}_2\text{O})_6][\text{HMo}_{12}\text{O}_{40}\text{P}]_4 \cdot \text{C}_6\text{H}_5\text{NO}_3 \cdot 4.5\text{H}_2\text{O}$                                       |
| PUKJIR        | 2.153 Å          | Gong, Z.-H.; Shi, L.; Gao, X.-M.; Bi, W.-C.; Huang, X.-H.; Sun, Y.-Q.; Sun, R.-Q.; Chen, Y.-P. <i>J. Mol. Struct.</i> <b>2020</b> , <i>1206</i> , 127716. $[\text{Mn}(\text{H}_2\text{O})_6](\text{C}_8\text{H}_7\text{N}_4)[\text{SiW}_{12}\text{O}_{40}] \cdot 3\text{H}_2\text{O}$             |
| IYOHUC        | 2.154 Å          | Surinwong, A.; Kuwamura, N.; Kojima, T.; Yoshinari, N.; Rujiwatra, A.; Konno, T. <i>Inorg. Chem.</i> <b>2021</b> , <i>60</i> , 12555. $[\text{Mn}(\text{H}_2\text{O})_6]_2[\text{Mn}(\text{H}_2\text{O})_4][\text{Au}_3\text{Co}_2\text{C}_{30}\text{H}_{54}\text{N}_6\text{O}_{12}\text{S}_6]_2$ |
| OYOTOM        | 2.154 Å          | Duan, X.; Meng, Q.; Su, Y.; Li, Y.; Duan, C.; Ren, X.; Lu, C. <i>Chem. Eur. J.</i> <b>2011</b> , <i>17</i> , 9936. $[\text{Mn}(\text{H}_2\text{O})_6]_2[\text{MnC}_{24}\text{H}_{32}\text{N}_4\text{O}_4](\text{Mn}_4\text{C}_{68}\text{H}_{50}\text{O}_{40}) \cdot 15\text{H}_2\text{O}$         |
| PUQWUU        | 2.155 Å          | Jeremic, D. A.; Kaluderovic, G. N.; Gomez-Ruiz, S.; Brceski, I.; Kasalica, B.; Leovac, V. M. <i>Cryst. Growth Des.</i> <b>2010</b> , <i>10</i> , 559. $[\text{Mn}(\text{H}_2\text{O})_6](\text{C}_{10}\text{H}_{15}\text{O}_4\text{S})_2$                                                         |
| BUTBAU        | 2.156 Å          | Wang, Q.-Y.; Zhang, Z.-T. <i>Guangpu Shiyanshi</i> <b>2009</b> , <i>26</i> , 395. $[\text{Mn}(\text{H}_2\text{O})_6](\text{C}_{16}\text{H}_{11}\text{O}_7\text{S})_2 \cdot 10\text{H}_2\text{O}$                                                                                                  |
| POGGAW        | 2.156 Å          | Ouyang, M.; Li, J.-C.; Jiang, Y.-M.; Zhang, Y.-L.; Wei, L.-Q.; Liao, B.-L. CCDC deposition number 984041, <b>2019</b> . $[\text{Mn}(\text{H}_2\text{O})_6](\text{C}_{13}\text{H}_{10}\text{NO}_4\text{S})_2$                                                                                      |
| FAWBEM        | 2.157 Å          | Reidel, P. J.; Arulsamy, N.; Mehn, M. P. <i>Inorg. Chem. Commun.</i> <b>2011</b> , <i>14</i> , 734. $[\text{Mn}(\text{H}_2\text{O})_6](\text{CF}_3\text{SO}_3)_2$                                                                                                                                 |

|          |         |                                                                                                                                                                                                                                                                                                                                                        |
|----------|---------|--------------------------------------------------------------------------------------------------------------------------------------------------------------------------------------------------------------------------------------------------------------------------------------------------------------------------------------------------------|
| IGOZIP   | 2.157 Å | Wang, Y.; Wang, X.-G.; Yuan, B.; Shao, C.-Y.; Chen, Y.-Y.; Zhou, B.-B.; Li, M.-S. <i>An, X.-M.; Cheng, P.; Zhao, X.-J. Inorg. Chem.</i> <b>2015</b> , <i>54</i> , 4456. [Mn(H <sub>2</sub> O) <sub>6</sub> ][CdYbC <sub>12</sub> H <sub>12</sub> O <sub>15</sub> ] <sub>2</sub> ·1.5H <sub>2</sub> O                                                   |
| VODBOG   | 2.157 Å | Xu, G.-F.; Liu, B.; Song, H.-B.; Wang, Q.-L.; Yan, S.-P.; Liao, D.-Z. <i>Inorg. Chem. Commun.</i> <b>2008</b> , <i>11</i> , 714. [Mn(H <sub>2</sub> O) <sub>6</sub> ][CoC <sub>18</sub> H <sub>28</sub> N <sub>4</sub> O <sub>14</sub> ] <sub>2</sub> ·4H <sub>2</sub> O                                                                               |
| DIXWOX   | 2.158 Å | Ascherl, L.; Nordheider, A.; Arachchige, K. S. A.; Cordes, D. B.; Karaghiosoff, K.; Buhl, M.; Slawin, A. M. Z.; Woollins, J. D. <i>Chem. Commun.</i> <b>2014</b> , <i>50</i> , 6214. [Mn(H <sub>2</sub> O) <sub>6</sub> ](SO <sub>4</sub> ) <sub>2</sub> ·2C <sub>24</sub> H <sub>30</sub> N <sub>10</sub> O <sub>3</sub>                              |
| FAFYIX   | 2.158 Å | Oh, I.-H.; Kim, J. Y.; Park, S.-H. <i>Z. Kristallogr.-New. Cryst. Struct.</i> <b>2016</b> , <i>231</i> , 369. [Mn(H <sub>2</sub> O) <sub>6</sub> ](C <sub>14</sub> H <sub>14</sub> N <sub>3</sub> O <sub>3</sub> S) <sub>2</sub>                                                                                                                       |
| QUKQES   | 2.158 Å | Fewings, K. R.; Junk, P. C.; Georganopoulou, D.; Prince, P. D.; Steed, J. W. <i>Polyhedron</i> <b>2001</b> , <i>20</i> , 643. [Mn(H <sub>2</sub> O) <sub>6</sub> ](C <sub>6</sub> H <sub>5</sub> CH <sub>2</sub> SO <sub>3</sub> ) <sub>2</sub>                                                                                                        |
| SUVBOA   | 2.158 Å | Leonard, M. A.; Squattrito, P. J.; Dubey, S. N. <i>Acta Crystallogr., Sect. C</i> <b>1999</b> , <i>55</i> , 35. [Mn(H <sub>2</sub> O) <sub>6</sub> ](C <sub>8</sub> H <sub>7</sub> O <sub>3</sub> S) <sub>2</sub>                                                                                                                                      |
| 170803   | 2.159 Å | Chen, Z.-L.; Li, S.-B.; Qiu, Z.-H.; Zeng, Q.-F.; Liang, F.-P. <i>Acta Crystallogr., Sect. E</i> <b>2005</b> , <i>61</i> , m1931. [Mn(H <sub>2</sub> O) <sub>6</sub> ]Cl <sub>2</sub> ·2C <sub>6</sub> H <sub>12</sub> N <sub>4</sub> ·4H <sub>2</sub> O                                                                                                |
| AGUBIN   | 2.159 Å | Beauchamp, D. A.; Loeb, S. J. <i>Chem. Eur. J.</i> <b>2002</b> , <i>8</i> , 5084. [Mn(H <sub>2</sub> O) <sub>6</sub> ](C <sub>12</sub> H <sub>8</sub> N <sub>2</sub> ) <sub>4</sub> (ClO <sub>4</sub> ) <sub>2</sub> ·4H <sub>2</sub> O                                                                                                                |
| JAXWIP   | 2.159 Å | Chen, Z.-L.; Li, S.-B.; Qiu, Z.-H.; Zeng, Q.-F.; Liang, F.-P. <i>Acta Crystallogr., Sect. E</i> <b>2005</b> , <i>61</i> , m931. [Mn(H <sub>2</sub> O) <sub>6</sub> ]Cl <sub>2</sub> ·2C <sub>6</sub> H <sub>12</sub> N <sub>4</sub> ·4H <sub>2</sub> O                                                                                                 |
| POFFEY   | 2.159 Å | Shi, J.; Zhang, Z. T. <i>Koord. Khim.</i> <b>2019</b> , <i>45</i> , 244. [Mn(H <sub>2</sub> O) <sub>6</sub> ](C <sub>16</sub> H <sub>11</sub> O <sub>7</sub> S) <sub>2</sub> ·2H <sub>2</sub> O                                                                                                                                                        |
| LABSAL   | 2.160 Å | Schneider, A.; Schmidt, H.; Voigt, W. <i>J. Coord. Chem.</i> <b>2016</b> , <i>69</i> , 365. [Mn(H <sub>2</sub> O) <sub>6</sub> ][FeLi(C <sub>2</sub> O <sub>4</sub> ) <sub>3</sub> ]                                                                                                                                                                   |
| YELTAN   | 2.160 Å | Li, W.-W.; Zhang, Z.-T. <i>Chin. J. Struct. Chem.</i> <b>2018</b> , <i>37</i> , 97. [Mn(H <sub>2</sub> O) <sub>6</sub> ](C <sub>16</sub> H <sub>11</sub> O <sub>7</sub> S) <sub>2</sub> ·4H <sub>2</sub> O                                                                                                                                             |
| ASOVEJ   | 2.161 Å | Chopra, D.; Dagur, P.; Prakash, A. S.; Guru Row, T. N.; Hegde, M. S. <i>Acta Crystallogr., Sect. E</i> <b>2004</b> , <i>60</i> , m346; <i>J. Cryst. Growth</i> <b>2005</b> , <i>275</i> , e2049. [Mn(H <sub>2</sub> O) <sub>6</sub> ](NO <sub>3</sub> ) <sub>2</sub> ·(C <sub>6</sub> H <sub>12</sub> N <sub>4</sub> ) <sub>2</sub> ·4H <sub>2</sub> O |
| IYOBZ01  | 2.161 Å | Can, N.; Can, S. E. S.; Atac, A. A.; Bardak, F. <i>Polyhedron</i> <b>2004</b> , <i>23</i> , 1109. [Mn(H <sub>2</sub> O) <sub>6</sub> ](C <sub>6</sub> H <sub>4</sub> NO <sub>3</sub> ) <sub>2</sub>                                                                                                                                                    |
| ZUFGUC01 | 2.161 Å | Ming-gen Zhao; Cheng-qi Liu; Jin-Chang; Guo <i>Shanxi Daxue Xuebao, Ziran Kex.</i> <b>2003</b> , <i>26</i> , 330. [Mn(H <sub>2</sub> O) <sub>6</sub> ][Mn <sub>2</sub> C <sub>12</sub> H <sub>12</sub> O <sub>18</sub> ] <sub>2</sub> ·2H <sub>2</sub> O                                                                                               |
| ATUPOU   | 2.162 Å | Liu, X.; Zhang, B.-F.; Wang, X.; Shen, G.; Wang, R.-J.; Shen, D. <i>Acta Crystallogr., Sect. E</i> <b>2004</b> , <i>60</i> , m538. [Mn(H <sub>2</sub> O) <sub>6</sub> ][CoC <sub>8</sub> H <sub>14</sub> N <sub>10</sub> O <sub>4</sub> ] <sub>2</sub> ·2H <sub>2</sub> O                                                                              |
| BUTBEY   | 2.162 Å | Wang, Q.-Y.; Zhang, Z.-T. <i>Guangpu Shiyanshi</i> <b>2009</b> , <i>26</i> , 395. [Mn(H <sub>2</sub> O) <sub>6</sub> ](C <sub>19</sub> H <sub>17</sub> O <sub>7</sub> S) <sub>2</sub> ·8H <sub>2</sub> O                                                                                                                                               |
| FOFJUG   | 2.162 Å | Qiu, L.-G.; Xie, A.-J.; Zhang, L.-D. <i>Adv. Mater.</i> <b>2005</b> , <i>17</i> , 689. [Mn(H <sub>2</sub> O) <sub>6</sub> ][MnC <sub>24</sub> H <sub>20</sub> N <sub>4</sub> O <sub>2</sub> ] <sub>2</sub> (C <sub>9</sub> H <sub>3</sub> O <sub>6</sub> ) <sub>2</sub> ·24H <sub>2</sub> O                                                            |
| 202786   | 2.163 Å | Chattopadhyay, T. K.; Devreux, F.; Peters, K.; Peters, E. M.; Gmelin, E.; Ghosh, B. <i>J. Phys. C</i> <b>1988</b> , <i>21</i> , 1321-1334. [Mn(H <sub>2</sub> O) <sub>6</sub> ]TiF <sub>6</sub>                                                                                                                                                        |

|          |         |                                                                                                                                                                                                                                                                                                          |
|----------|---------|----------------------------------------------------------------------------------------------------------------------------------------------------------------------------------------------------------------------------------------------------------------------------------------------------------|
| PAJHEQ   | 2.163 Å | Sniekers, J.; Malaquias, J. C.; Van Meervelt, L.; Fransaeer, J.; Binnemans, K. <i>Dalton Trans.</i> <b>2017</b> , 46, 2497. [Mn(H <sub>2</sub> O) <sub>6</sub> ](SO <sub>2</sub> CF <sub>3</sub> ) <sub>2</sub> N) <sub>2</sub>                                                                          |
| GINVIJ   | 2.164 Å | Deng, Y.-F.; Zhang, H.-L. Hong, Q.-M.; Weng, W.-Z.; Wan, H.-L.; Zhou, Z.-H. <i>J. Solid State. Chem.</i> <b>2007</b> , 180, 3152. (NH <sub>4</sub> ) <sub>2</sub> [Mn(H <sub>2</sub> O) <sub>6</sub> ][Ti <sub>2</sub> C <sub>18</sub> H <sub>18</sub> O <sub>21</sub> ]·6H <sub>2</sub> O               |
| NAVKAZ   | 2.164 Å | Zhao, H.; Zhu, Y.-Q.; Feng, C. <i>Chin. J. Struct. Chem.</i> <b>2017</b> , 36, 66. [Mn(H <sub>2</sub> O) <sub>6</sub> ][MnC <sub>30</sub> H <sub>24</sub> N <sub>9</sub> O <sub>6</sub> ] <sub>2</sub> ·4H <sub>2</sub> O                                                                                |
| YEZSEC01 | 2.164 Å | Guo, F.-S.; Chen, Y.-C.; Liu, J.-L.; Leng, J.-D.; Meng, Z.-S.; Vrabel, P.; Orendac, M.; Tong, M.-L. <i>Chem. Commun.</i> <b>2012</b> , 48, 12219. [Mn(H <sub>2</sub> O) <sub>6</sub> ][Gd <sub>2</sub> Mn <sub>2</sub> C <sub>24</sub> H <sub>24</sub> O <sub>30</sub> ]·6H <sub>2</sub> O               |
| 66005    | 2.165 Å | Herdtwack, E.; Massa, W. <i>Z. Anorg. Allg. Chem.</i> <b>1989</b> , 579, 191. [Mn(H <sub>2</sub> O) <sub>6</sub> ][FeF <sub>5</sub> H <sub>2</sub> O]                                                                                                                                                    |
| CILMUF   | 2.165 Å | Tamura, H.; Ogawa, K.; Sakurai, T.; Nakahara, A. <i>Inorg. Chim. Acta</i> <b>1984</b> , 92, 107. [Mn(H <sub>2</sub> O) <sub>6</sub> ][MnC <sub>18</sub> H <sub>14</sub> N <sub>2</sub> O <sub>6</sub> ] <sub>2</sub> ·2H <sub>2</sub> O                                                                  |
| EMIJER   | 2.165 Å | Lakma, A.; Hossain, S. M.; Pradhan, R. N.; Topwal, D.; Cornia, A.; Singh, A. K. <i>Eur. J. Inorg. Chem.</i> <b>2016</b> , 2993. [Mn(H <sub>2</sub> O) <sub>6</sub> ][Mn <sub>11</sub> C <sub>78</sub> H <sub>70</sub> N <sub>30</sub> O <sub>44</sub> ]·24H <sub>2</sub> O                               |
| IYOBAB   | 2.165 Å | Can, N.; Can, S. E. S.; Atac, A.; Bardak, F. <i>Polyhedron</i> <b>2004</b> , 23, 1109. [Mn(H <sub>2</sub> O) <sub>6</sub> ](C <sub>6</sub> H <sub>4</sub> NO <sub>3</sub> ) <sub>2</sub>                                                                                                                 |
| KIKNIE   | 2.165 Å | Gao, E.; Xing, J.; Qu, Y.; Qiu, X.; Zhu, M. <i>Appl. Orphanomet. Chem.</i> <b>2018</b> , e4469. [Mn(H <sub>2</sub> O) <sub>6</sub> ](C <sub>14</sub> H <sub>8</sub> N <sub>4</sub> O <sub>4</sub> )·2H <sub>2</sub> O                                                                                    |
| OVEXUJ   | 2.165 Å | Li, B.; Yang, F.; Li, G.; Liu, D.; Zhou, Q.; Shi, Z.; Feng, S. <i>Cryst. Growth Des.</i> <b>2011</b> , 11, 1475. [Mn(H <sub>2</sub> O) <sub>6</sub> ][Mn <sub>6</sub> C <sub>96</sub> H <sub>78</sub> N <sub>24</sub> O <sub>34</sub> ]2H <sub>2</sub> O                                                 |
| 74964    | 2.166 Å | Molinier, M.; Massa, W. <i>Anorg. Allg. Chem.</i> <b>1994</b> , 620, 833. [Mn(H <sub>2</sub> O) <sub>6</sub> ][MnF <sub>4</sub> (H <sub>2</sub> O) <sub>2</sub> ]·2H <sub>2</sub> O                                                                                                                      |
| GIJXOO   | 2.166 Å | Martsinko, E. E.; Minacheva, L. K.; Seifullina, I. I.; Chebanenko, E. A.; Sergienko, V. S.; Churakov, A. <i>V. Zh. Neorg. Khim.</i> <b>2013</b> , 58, 187. [Mn(H <sub>2</sub> O) <sub>6</sub> ][Mn <sub>2</sub> GeC <sub>10</sub> H <sub>14</sub> O <sub>18</sub> ]·CH <sub>3</sub> CN·4H <sub>2</sub> O |
| ROCGAS   | 2.166 Å | Bi, J.; Kong, L.; Huang, Z.; Liu, J. <i>Inorg. Chem.</i> <b>2008</b> , 47, 4564. [Mn(H <sub>2</sub> O) <sub>6</sub> ][ZnC <sub>24</sub> H <sub>20</sub> N <sub>4</sub> O <sub>2</sub> ] <sub>2</sub> (C <sub>6</sub> H <sub>3</sub> (COO) <sub>3</sub> ) <sub>2</sub> ·22.5H <sub>2</sub> O              |
| RUJVIC   | 2.166 Å | Miminoshvili, E. B.; Miminoshvili, K. E.; Beridze, L. A. <i>Zh. Strukt. Khim.</i> <b>2009</b> , 50, 177. [Mn(H <sub>2</sub> O) <sub>6</sub> ](C <sub>10</sub> H <sub>11</sub> N <sub>4</sub> O <sub>2</sub> S <sub>2</sub> ) <sub>2</sub> ·5H <sub>2</sub> O                                             |
| WEHFUL   | 2.166 Å | Zhang, K.; Lyu, K.; Yang, W. <i>Izv. Akad. Nauk SSSR, Ser. Khim.</i> <b>2005</b> , 1767. (NH <sub>4</sub> ) <sub>10</sub> [Mn(H <sub>2</sub> O) <sub>6</sub> ][Mo <sub>8</sub> C <sub>14</sub> H <sub>12</sub> N <sub>2</sub> O <sub>30</sub> ] <sub>2</sub> ·15H <sub>2</sub> O                         |
| MEYKUW   | 2.167 Å | Junk, P. C.; Smith, M. K.; Steed, J. W. <i>Polyhedron</i> <b>2001</b> , 20, 2979. [Mn(H <sub>2</sub> O) <sub>6</sub> ][MnC <sub>16</sub> H <sub>32</sub> O <sub>8</sub> ] <sub>2</sub> (ClO <sub>4</sub> ) <sub>6</sub> ·6H <sub>2</sub> O                                                               |
| ZUFGUC   | 2.167 Å | Wu, L. P.; Yamamoto, M.; Kuroda-Sowa, T.; Maekawa, M.; Fukui, J.; Munakata, M. <i>Inorg. Chim. Acta</i> <b>1995</b> , 239, 165. [Mn(H <sub>2</sub> O) <sub>6</sub> ][Mn <sub>2</sub> C <sub>12</sub> H <sub>12</sub> O <sub>18</sub> ]·2H <sub>2</sub> O                                                 |
| 86092    | 2.167 Å | Gilardi, R. D.; Butcher, R. J. <i>J. Chem. Cryst.</i> 1998, 28, 105. [Mn(H <sub>2</sub> O) <sub>6</sub> ](N(NO <sub>2</sub> ) <sub>2</sub> ) <sub>2</sub> ·2H <sub>2</sub> O                                                                                                                             |
| JAXWIP   | 2.168 Å | Zi-Lu Chen; Shi-Bing Li; Zhi-Hui Qiu; Qing-Fen Zeng; Fu-Pei Liang <i>Acta Crystallogr., Sect. E</i> <b>2005</b> , 61, m1931. [Mn(H <sub>2</sub> O) <sub>6</sub> ]Cl <sub>2</sub> ·2(C <sub>6</sub> H <sub>12</sub> N <sub>4</sub> )·4H <sub>2</sub> O                                                    |



|        |         |                                                                                                                                                                                                                                                                                                                                                  |
|--------|---------|--------------------------------------------------------------------------------------------------------------------------------------------------------------------------------------------------------------------------------------------------------------------------------------------------------------------------------------------------|
| LEFYAX | 2.168 Å | Seetha Lekshmi, N; Pedireddi, V. R. <i>Inorg. Chem.</i> <b>2006</b> , <i>45</i> , 2400. $[\text{Mn}(\text{H}_2\text{O})_6](\text{C}_7\text{H}_6\text{BO}_4)_2 \cdot 4\text{H}_2\text{O}$                                                                                                                                                         |
| MAZFUO | 2.168 Å | De Munno, G.; Medaglia, M.; Armentano, D.; Anastassopoulou, J; Theophanides, T. <i>J. Chem. Soc., Dalton Trans.</i> <b>2000</b> , 1625. $[\text{Mn}(\text{H}_2\text{O})_6](\text{ClO}_4)_2 \cdot 6(\text{C}_5\text{H}_7\text{N}_3\text{O}) \cdot \text{H}_2\text{O}$                                                                             |
| REHJEU | 2.168 Å | Liu, W.-L.; Lu, Y.; Liu, X.-F.; Zhang, Y.-Y.; Hu, X.-Y. <i>Acta Crystallogr., Sect. E</i> <b>2010</b> , <i>66</i> , m1109. $[\text{Mn}(\text{H}_2\text{O})_6][\text{CuC}_{12}\text{H}_{11}\text{N}_2\text{O}_4]_2 \cdot 12\text{H}_2\text{O}$                                                                                                    |
| TAHLAQ | 2.168 Å | Morris, J. E.; Squattrito, P. J.; Kirschbaum, K.; Pinkerton, A. A. <i>J. Chem. Cryst.</i> <b>2003</b> , <i>33</i> , 307. $[\text{Mn}(\text{H}_2\text{O})_6](\text{C}_{10}\text{H}_8\text{NO}_3\text{S})_2 \cdot 2\text{H}_2\text{O}$                                                                                                             |
| YIVTIH | 2.168 Å | Ouyang, Y.; Zhang, W.; Ma, Y.; Xu, N.; Liao, D.-Z.; Yoshimura, K.; Yan, S.-P. <i>Struct. Chem.</i> <b>2007</b> , <i>18</i> , 891. $[\text{Mn}(\text{H}_2\text{O})_6][\text{Cu}_3\text{MnC}_{30}\text{H}_{54}\text{N}_{12}\text{O}_6](\text{OH})_2(\text{ClO}_4)_2 \cdot 4.5\text{H}_2\text{O}$                                                   |
| NEKLIC | 2.169 Å | Huang, L.-F.; Qi, Z.-P.; Li, C.-J. <i>Res. Chem. Intermed.</i> <b>2022</b> , <i>48</i> , 3867. $[\text{Mn}(\text{H}_2\text{O})_6]\text{MnC}_{18}\text{H}_{16}\text{O}_{18}]_2 \cdot 3\text{H}_2\text{O}$                                                                                                                                         |
| ZOYPEK | 2.169 Å | Kumar, G.; Kumar, G.; Gupta, R. <i>Inorg. Chem.</i> <b>2015</b> , <i>54</i> , 2603. $[\text{Mn}(\text{H}_2\text{O})_6][\text{CoMn}_2\text{C}_{42}\text{H}_{29}\text{N}_6\text{O}_{16}]_2 \cdot 20\text{H}_2\text{O}$                                                                                                                             |
| 710011 | 2.170 Å | Euler, H.; Barbier, B.; Meents, A.; Kirfel, A. <i>Z. Kristallogr. - New Crystal Struct.</i> <b>2009</b> , <i>224</i> , 355. $\text{Ti}_2[\text{Mn}(\text{H}_2\text{O})_6](\text{SeO}_4)_2$                                                                                                                                                       |
| FAXMAT | 2.170 Å | Zhu-Yan Zhang; Shan Gao; Li-Hua Huo; Hui Zhao; Jing-Gui Zhao <i>Acta Crystallogr., Sect. E</i> <b>2005</b> , <i>61</i> , m85. $[\text{Mn}(\text{H}_2\text{O})_6](\text{C}_7\text{H}_6\text{NO}_3)_2 \cdot 2\text{H}_2\text{O}$                                                                                                                   |
| HULLUV | 2.170 Å | Rodriguez-Martin, Y.; Sanchiz, J.; Ruiz-Perez, C.; Lloret, F.; Julve, M. <i>Cryst. Eng. Comm.</i> <b>2002</b> , <i>4</i> , 631. $[\text{Mn}(\text{H}_2\text{O})_6][\text{Mn}(\text{H}_2\text{O})_2(\text{C}_2\text{O}_4)_2]$                                                                                                                     |
| IZOHOW | 2.170 Å | Jia, J.; Zhang, Y.; Zhang, P.; Ma, P.; Zhang, D.; Wang, J.; Niu, J. <i>RCS Advances</i> <b>2016</b> , <i>6</i> , 108335. $(\text{N}(\text{CH}_3)_4)_2[\text{Mn}(\text{H}_2\text{O})_6]_2[\text{Mn}_6\text{W}_{18}\text{Sb}_2\text{C}_6\text{H}_{20}\text{O}_{82}] \cdot 12\text{H}_2\text{O}$                                                    |
| QILFEW | 2.170 Å | Hernandez-Padilla, M.; China, E.; Dominguez, S.; Mederos, A.; Munoz, M. C.; Lloret, F. <i>Polyhedron</i> <b>2000</b> , <i>19</i> , 1175. $[\text{Mn}(\text{H}_2\text{O})_6][\text{CuC}_{11}\text{H}_{14}\text{N}_2\text{O}_8] \cdot 2\text{H}_2\text{O}$                                                                                         |
| RUCZEW | 2.170 Å | Mahmudov, K. T.; Sutradhar, M.; Martins, L. M. D. R. S; Fatima M.; Guedes da Silva, C.; Ribera, A.; Nunes, A. V. M.; Gahramanova, S. I.; Marchetti, F.; Pombeiro, A. J. L. <i>RSC Advances</i> <b>2015</b> , <i>5</i> , 25979. $[\text{Mn}(\text{H}_2\text{O})_6](\text{C}_9\text{H}_7\text{N}_4\text{O}_4\text{S})_2 \cdot 4\text{H}_2\text{O}$ |
| HAZSIK | 2.171 Å | Goher, M. A. S; Youssef, A. A.; Zhong-Yuan Zhou; Mak, T. C. W. <i>Polyhedron</i> <b>1993</b> , <i>12</i> , 1871. $[\text{Mn}(\text{H}_2\text{O})_6][\text{Mn}_2\text{C}_{21}\text{H}_{12}\text{N}_3\text{O}_{12}]_2$                                                                                                                             |
| 710003 | 2.171 Å | Euler, H.; Barbier, B.; Meents, A.; Kirfel, A. <i>Z. Kristallogr. - New Crystal Struct.</i> <b>2009</b> , <i>224</i> , 355. $\text{Ti}_2[\text{Mn}(\text{H}_2\text{O})_6](\text{SO}_4)_2$                                                                                                                                                        |
| SIDPAZ | 2.171 Å | Szimhardt, N.; Wurzenberger, M. H. H.; Zeisel, L.; Gruhne, M. S.; Lommel, M.; Stierstorfer, J. <i>J. Mater. Chem. A</i> <b>2018</b> , <i>6</i> , 16257. $[\text{Mn}(\text{H}_2\text{O})_6](\text{C}_6\text{H}_2\text{N}_3\text{O}_9)_2 \cdot 2\text{CH}_3\text{N}_5$                                                                             |

|          |         |                                                                                                                                                                                                                                                                                                                                               |
|----------|---------|-----------------------------------------------------------------------------------------------------------------------------------------------------------------------------------------------------------------------------------------------------------------------------------------------------------------------------------------------|
| JEMYOS   | 2.172 Å | Naili, H.; Francois, M.; Norquist, A. J.; Rekik, W. <i>Solid State Sci.</i> <b>2017</b> , <i>74</i> , 44.<br>[Mn(H <sub>2</sub> O) <sub>6</sub> ](C <sub>6</sub> H <sub>14</sub> N <sub>2</sub> )(SeO <sub>4</sub> ) <sub>2</sub>                                                                                                             |
| POGPUZ   | 2.172 Å | Mohan, M.; Rajak, S.; Tremblay, A. A.; Maris, T.; Duong, A. <i>Dalton Trans.</i> <b>2019</b> , <i>48</i> , 7006.<br>[Mn(H <sub>2</sub> O) <sub>6</sub> ][MnC <sub>12</sub> H <sub>10</sub> N <sub>14</sub> O <sub>10</sub> ]                                                                                                                  |
| VOHYID   | 2.172 Å | Skelton, B. W.; Ogden, M. I.; Massi, M.; Reid, B. L. CCDC deposition number 1943664, <b>2019</b> .<br>[Mn(H <sub>2</sub> O) <sub>6</sub> ][Mn <sub>3</sub> C <sub>60</sub> H <sub>66</sub> N <sub>6</sub> O <sub>12</sub> ][Mn(NO <sub>3</sub> ) <sub>4</sub> ]·C <sub>4</sub> H <sub>8</sub> O <sub>2</sub> ·2H <sub>2</sub> O               |
| SIWPAQ   | 2.172 Å | Singh, G.; Baranwal, B. P.; Kapoor, I. P. S.; Kumar, D.; Frohlich, R. <i>J. Phys. Chem. A</i> <b>2007</b> , <i>111</i> , 12972.<br>[Mn(H <sub>2</sub> O) <sub>6</sub> ](ClO <sub>4</sub> ) <sub>2</sub> (C <sub>6</sub> H <sub>12</sub> N <sub>4</sub> ) <sub>2</sub> ·H <sub>2</sub> O                                                       |
| WITNEU   | 2.172 Å | Zhang, R.; Zhao, Y.; Wang, J.; Ji, L.; Yang, X.-J.; Wu, B. <i>Cryst. Growth Des.</i> <b>2014</b> , <i>14</i> , 544.<br>[Mn(H <sub>2</sub> O) <sub>6</sub> ](C <sub>24</sub> H <sub>30</sub> N <sub>10</sub> O <sub>3</sub> ) <sub>2</sub> Cl <sub>2</sub>                                                                                     |
| 7944     | 2.173 Å | Kiriukhina, G. V.; Yakubovich, O. V.; Kochetkova, E. M.; Dimitova, O. V.; Volkov, A. S. <i>Acta Crystallogr., Sect. C</i> <b>2018</b> , <i>74</i> , 936. Cs[Mn(H <sub>2</sub> O) <sub>6</sub> ]PO <sub>4</sub>                                                                                                                                |
| KAGMOV   | 2.173 Å | Jian-Fang Ma; Jin Yang; Jing-Fu Liu <i>Acta Crystallogr., Sect. E</i> <b>2003</b> , <i>59</i> , m478.<br>[Mn(H <sub>2</sub> O) <sub>6</sub> ](C <sub>7</sub> H <sub>5</sub> O <sub>6</sub> S) <sub>2</sub> ·2H <sub>2</sub> O                                                                                                                 |
| OYOTEC   | 2.173 Å | Duan, X.; Meng, Q.; Su, Y.; Li, Y.; Duan, C.; Ren, X.; Lu, C. <i>Chem. Eur. J.</i> <b>2011</b> , <i>17</i> , 9936.<br>[Mn(H <sub>2</sub> O) <sub>6</sub> ] <sub>2</sub> [Mn <sub>3</sub> C <sub>32</sub> H <sub>28</sub> N <sub>4</sub> O <sub>4</sub> ](Mn <sub>4</sub> C <sub>68</sub> H <sub>50</sub> O <sub>40</sub> )·11H <sub>2</sub> O |
| TADTIF   | 2.173 Å | Yang, M. CCDC deposition number 2044114, <b>2020</b> . [Zn(H <sub>2</sub> O) <sub>6</sub> ][Dy <sub>2</sub> MnC <sub>54</sub> H <sub>50</sub> N <sub>36</sub> O <sub>24</sub> ]·4H <sub>2</sub> O                                                                                                                                             |
| UDOPAG   | 2.173 Å | Oguey, S.; Jacquier, Y.; Neels, A.; Stoeckli-Evans, H. CCDC deposition number 936399, <b>2013</b> .<br>[Mn(H <sub>2</sub> O) <sub>6</sub> ][MnC <sub>4</sub> H <sub>18</sub> N <sub>2</sub> O <sub>8</sub> ](SO <sub>4</sub> ) <sub>2</sub>                                                                                                   |
| VIDGIZ   | 2.173 Å | Hui-Hua Song; Bao-Qing Ma <i>Acta Crystallogr., Sect. C</i> <b>2007</b> , <i>63</i> , m1010.<br>[Mn(H <sub>2</sub> O) <sub>6</sub> ](C <sub>10</sub> H <sub>8</sub> N <sub>2</sub> O <sub>2</sub> ) <sub>2</sub> Cl <sub>2</sub> ·2H <sub>2</sub> O                                                                                           |
| YOSZEM   | 2.173 Å | Maldonado, C. R.; Quiros, M.; Salas, J. M.; Rodriguez-Dieguez, A. <i>Inorg. Chim. Acta</i> <b>2009</b> , <i>362</i> , 1553.<br>[Mn(H <sub>2</sub> O) <sub>6</sub> ](C <sub>6</sub> H <sub>6</sub> N <sub>5</sub> O <sub>2</sub> ) <sub>2</sub>                                                                                                |
| COCXIC   | 2.174 Å | Zhang, S.-G.; Feng, Y.-L.; Wen, Y.-H. <i>Wuji Huaxue Xuebao</i> <b>2008</b> , <i>24</i> , 581. [Mn(H <sub>2</sub> O) <sub>6</sub> ](C <sub>9</sub> H <sub>7</sub> N <sub>4</sub> O <sub>3</sub> S) <sub>2</sub>                                                                                                                               |
| LEZCIE   | 2.174 Å | Maldonado, C. R.; Quiros, M.; Salas, J. M. <i>Dalton Trans.</i> <b>2012</b> , <i>41</i> , 10390.<br>[Mn(H <sub>2</sub> O) <sub>6</sub> ](C <sub>6</sub> H <sub>6</sub> N <sub>5</sub> O <sub>2</sub> ) <sub>2</sub> ·C <sub>10</sub> H <sub>8</sub> N <sub>2</sub>                                                                            |
| YOBWOC   | 2.174 Å | Kolotilov, S. V.; Schollmeyer, D.; Thompson, L. K.; Golub, V.; Addison, A. W.; Pavlishchuk, V. V. <i>Dalton Trans.</i> <b>2008</b> , 3007. [Mn(H <sub>2</sub> O) <sub>6</sub> ][Cu <sub>3</sub> C <sub>18</sub> H <sub>14</sub> N <sub>12</sub> O <sub>9</sub> ]·4H <sub>2</sub> O                                                            |
| 409747   | 2.175 Å | Euler, H.; Barbier, B.; Meents, A.; Kirfel, A. <i>Z. Kristallogr. - New Crystal Struct.</i> <b>2003</b> , <i>218</i> , 405.<br>Cs <sub>2</sub> [Mn(H <sub>2</sub> O) <sub>6</sub> ](SeO <sub>4</sub> ) <sub>2</sub>                                                                                                                           |
| HAZSIK01 | 2.175 Å | A.; Jablonska, A.; Wawrzycka, A.; Zienkiewicz, M.; Hodorowicz, M.; Rogala, P.; Barszcz, B. <i>J. Therm. Anal. Calorimetry</i> <b>2012</b> , <i>110</i> , 1367. [Mn(H <sub>2</sub> O) <sub>6</sub> ][Mn <sub>2</sub> C <sub>21</sub> H <sub>12</sub> N <sub>3</sub> O <sub>12</sub> ] <sub>2</sub>                                             |
| MNCITD02 | 2.175 Å | Bolte, M. CCDC deposition number 235116, <b>2004</b> . [Mn(H <sub>2</sub> O) <sub>6</sub> ][Mn <sub>2</sub> C <sub>12</sub> H <sub>14</sub> O <sub>16</sub> ]·2H <sub>2</sub> O                                                                                                                                                               |

|          |         |                                                                                                                                                                                                                                                                                                                                            |
|----------|---------|--------------------------------------------------------------------------------------------------------------------------------------------------------------------------------------------------------------------------------------------------------------------------------------------------------------------------------------------|
| QEQTAI   | 2.175 Å | Downer, S. M.; Squattrito, P. J.; Bestaoui, N.; Clearfield, A. <i>J. Chem. Cryst.</i> <b>2006</b> , <i>36</i> , 487. [Mn(H <sub>2</sub> O) <sub>6</sub> ](C <sub>10</sub> H <sub>8</sub> NO <sub>3</sub> S) <sub>2</sub> ·6H <sub>2</sub> O                                                                                                |
| UBURIV   | 2.175 Å | Smith, G.; Wermuth, U. D. <i>IUCrData</i> <b>2016</b> , <i>1</i> , x161985. [Mn(H <sub>2</sub> O) <sub>6</sub> ](AsC <sub>6</sub> H <sub>7</sub> NO <sub>3</sub> ) <sub>2</sub> ·4H <sub>2</sub> O                                                                                                                                         |
| 409721   | 2.176 Å | Euler, H.; Barbier, B.; Meents, A.; Kirfel, A. <i>Z. Kristallogr. - New Crystal Struct.</i> <b>2003</b> , <i>218</i> , 265. Rb <sub>2</sub> [Mn(H <sub>2</sub> O) <sub>6</sub> ](SeO <sub>4</sub> ) <sub>2</sub>                                                                                                                           |
| 421459   | 2.176 Å | Erbe, M.; Koehler, D.; Ruck, M. <i>Z. Anorg. Allg. Chem.</i> <b>2010</b> , <i>636</i> , 1513. [Mn(H <sub>2</sub> O) <sub>6</sub> ][BiI <sub>4</sub> ] <sub>2</sub> ·2H <sub>2</sub> O                                                                                                                                                      |
| BEMWUM   | 2.176 Å | Piggot, P. M. T.; Hall, L. A.; White, A. J. P.; Williams, D. J.; Thompson, L. K. <i>Inorg. Chem.</i> <b>2004</b> , <i>43</i> , 1167. [Mn(H <sub>2</sub> O) <sub>6</sub> ](C <sub>11</sub> H <sub>7</sub> O <sub>4</sub> ) <sub>2</sub>                                                                                                     |
| EMIJAN   | 2.176 Å | Lakma, A.; Hossain, S. M.; Pradhan, R. N.; Topwal, D.; Cornia, A.; Singh, A. K. <i>Eur. J. Inorg. Chem.</i> <b>2016</b> , 2993. [Mn(H <sub>2</sub> O) <sub>6</sub> ][Mn <sub>10</sub> C <sub>84</sub> H <sub>76</sub> N <sub>30</sub> O <sub>47</sub> ]·11H <sub>2</sub> O                                                                 |
| FEYTIN   | 2.176 Å | Zhi-Jie Ma; Jun Tao; Rong-Bin Huang; Lan-Sun Zheng <i>Acta Crystallogr., Sect. E</i> <b>2005</b> , <i>61</i> , m361. [Mn(H <sub>2</sub> O) <sub>6</sub> ](C <sub>8</sub> H <sub>4</sub> N <sub>8</sub> ) <sub>2</sub>                                                                                                                      |
| WIMXOG   | 2.176 Å | Hu, B.; Xu, X.-B.; Li, Y.-X.; Ye, H.-Y. <i>Acta Crystallogr., Sect. E</i> <b>2007</b> , <i>63</i> , m2698. [Mn(H <sub>2</sub> O) <sub>6</sub> ](C <sub>7</sub> H <sub>4</sub> N <sub>5</sub> O <sub>2</sub> ) <sub>2</sub>                                                                                                                 |
| 409492   | 2.177 Å | Euler, H.; Barbier, B.; Klumpp, S.; Kirfel, A. <i>Z. Kristallogr. - New Crystal Struct.</i> <b>2000</b> , <i>215</i> , 473. Rb <sub>2</sub> [Mn(H <sub>2</sub> O) <sub>6</sub> ](SO <sub>4</sub> ) <sub>2</sub>                                                                                                                            |
| 424300   | 2.177 Å | Zimmermann, L. W.; Schield, T. <i>Z. Kristallogr.-Cryst. Mater.</i> <b>2013</b> , <i>228</i> , 558. [Mn(H <sub>2</sub> O) <sub>6</sub> ](B <sub>10</sub> H <sub>10</sub> )·2H <sub>2</sub> O.                                                                                                                                              |
| AMAVAN   | 2.177 Å | Bednarchuk, T. J.; Kinzhybalo, V.; Bednarchuk, O.; Pietraszko, A. <i>J. Mol. Struct.</i> <b>2016</b> , <i>1120</i> , 136. [Mn(H <sub>2</sub> O) <sub>6</sub> ](4-NH <sub>2</sub> -C <sub>5</sub> H <sub>4</sub> N) <sub>2</sub> (SO <sub>4</sub> ) <sub>2</sub>                                                                            |
| AMIPAP   | 2.177 Å | Zhao, Y.; Li, S.-H.; Zhang, L. <i>Z. Kristallogr.-New Cryst. Struct.</i> <b>2016</b> , <i>231</i> , 165. [Mn(H <sub>2</sub> O) <sub>6</sub> ](C <sub>6</sub> H <sub>3</sub> O <sub>4</sub> S) <sub>2</sub>                                                                                                                                 |
| BAWKIV   | 2.177 Å | Marino, N.; Armentano, D.; De Munno, G.; Cano, C.; Lloret, F.; Julve, M. <i>Inorg. Chem.</i> <b>2012</b> , <i>51</i> , 4323. [Mn(H <sub>2</sub> O) <sub>6</sub> ][Cu <sub>2</sub> C <sub>8</sub> H <sub>8</sub> N <sub>4</sub> O <sub>2</sub> ](SO <sub>4</sub> ) <sub>2</sub> ·4H <sub>2</sub> O                                          |
| HEHSIW   | 2.177 Å | Marioni, P.-A.; Marty, W.; Stoeckli-Evans, H.; Whitaker, C. <i>Inorg. Chim. Acta</i> <b>1994</b> , <i>219</i> , 161. [Mn(H <sub>2</sub> O) <sub>6</sub> ](C <sub>8</sub> H <sub>2</sub> N <sub>2</sub> O <sub>8</sub> )                                                                                                                    |
| JAVZUB   | 2.177 Å | Chan, M. K.; Armstrong, W. H. <i>Inorg. Chem.</i> <b>1989</b> , <i>28</i> , 3777. [Mn(H <sub>2</sub> O) <sub>6</sub> ][MnC <sub>18</sub> H <sub>20</sub> B <sub>2</sub> N <sub>12</sub> ](ClO <sub>4</sub> ) <sub>4</sub>                                                                                                                  |
| MNCITD   | 2.177 Å | Carrell, H. L.; Glusker, J. P. <i>Acta Crystallogr., Sect. B</i> <b>1973</b> , <i>29</i> , 638; <i>J. Mol. Struct.</i> <b>1973</b> , <i>15</i> , 151. [Mn(H <sub>2</sub> O) <sub>6</sub> ][Mn <sub>2</sub> C <sub>12</sub> H <sub>14</sub> O <sub>16</sub> ]·2H <sub>2</sub> O                                                             |
| MNCITD01 | 2.177 Å | Duan, X.; Meng, Q.; Su, Y.; Li, Y.; Duan, C.; Ren, X.; Lu, C. <i>Chem. Eur. J.</i> <b>2011</b> , <i>17</i> , 9936. [Mn(H <sub>2</sub> O) <sub>6</sub> ] <sub>2</sub> [Mn <sub>2</sub> C <sub>32</sub> H <sub>28</sub> N <sub>4</sub> O <sub>4</sub> ](Mn <sub>4</sub> C <sub>68</sub> H <sub>50</sub> O <sub>40</sub> )·16H <sub>2</sub> O |
| OYOTUS   | 2.177 Å | Zimmermann, L. W.; Schleid, T. <i>Z. Kristallogr.</i> <b>2013</b> , <i>228</i> , 558. [Mn(H <sub>2</sub> O) <sub>6</sub> ](H <sub>10</sub> B <sub>10</sub> ) <sub>2</sub> ·2H <sub>2</sub> O                                                                                                                                               |
| PIWKEN   | 2.177 Å | Hao, C.-J.; Cao, Y.-L. <i>Acta Crystallogr., Sect. E</i> <b>2010</b> , <i>66</i> , m609. [Mn(H <sub>2</sub> O) <sub>6</sub> ](C <sub>16</sub> H <sub>12</sub> O <sub>6</sub> )·H <sub>2</sub> O                                                                                                                                            |
| QUXQIK   | 2.177 Å |                                                                                                                                                                                                                                                                                                                                            |

|        |         |                                                                                                                                                                                                                                                                         |
|--------|---------|-------------------------------------------------------------------------------------------------------------------------------------------------------------------------------------------------------------------------------------------------------------------------|
| SIDPED | 2.177 Å | Szimhardt, N.; Wurzenberger, M. H. H.; Zeisel, L.; Gruhne, M. S.; Lommel, M.; Stierstorfer, J. <i>J. Mater. Chem. A</i> <b>2018</b> , <i>6</i> , 16257. $[\text{Mn}(\text{H}_2\text{O})_6](\text{C}_6\text{H}_2\text{N}_3\text{O}_8)_2 \cdot 2\text{CH}_3\text{N}_5$    |
| 31599  | 2.178 Å | Bareiss, K. U.; Goerigk, F. B.; Schleid, T. <i>Z. Kristallogr., Suppl. Issue</i> <b>2021</b> , <i>41</i> , 68. $[\text{Mn}(\text{H}_2\text{O})_6]\text{B}_{10}\text{Cl}_{10} \cdot 2\text{H}_2\text{O}$                                                                 |
| 409738 | 2.178 Å | Euler, H.; Barbier, B.; Meents, A.; Kirfel, A. <i>Z. Kristallogr. - New Crystal Struct.</i> <b>2003</b> , <i>218</i> , 409. $\text{Cs}_2[\text{Mn}(\text{H}_2\text{O})_6](\text{SO}_4)_2$                                                                               |
| CIPMEU | 2.178 Å | Wang, P.; Ma, J.-P.; Dong, Y.-B.; Huang R.-Q. <i>J. Am. Chem. Soc.</i> <b>2007</b> , <i>129</i> , 10620. $[\text{Mn}(\text{H}_2\text{O})_6][\text{Eu}_2\text{C}_{64}\text{H}_{40}\text{N}_{16}\text{O}_{16}] \cdot \text{H}_2\text{O}$                                  |
| COHSUP | 2.178 Å | Esteves, D.; Tedesco, J. C. D.; Pedro, S. S.; Cruz, C.; Reis, M. S.; Brandao, P. <i>Mater. Chem. Phys.</i> <b>2014</b> , <i>147</i> , 611. $[\text{Mn}(\text{H}_2\text{O})_6](\text{C}_7\text{H}_3\text{Cl}_2\text{O}_2)_2$                                             |
| JEMYIM | 2.178 Å | Naili, H.; Francois, M.; Norquist, A. J.; Rekik, W. <i>Solid State Sci.</i> <b>2017</b> , <i>74</i> , 44. $[\text{Mn}(\text{H}_2\text{O})_6](\text{C}_6\text{H}_{14}\text{N}_2)(\text{SeO}_4)_2$                                                                        |
| ACIJAY | 2.179 Å | Heng-jun Ma; De-zhong Niu <i>Xuzhou Shifan Daxue Xuebao, Ziran Kexueban</i> <b>2003</b> , <i>21</i> , 29-2. $[\text{Mn}(\text{H}_2\text{O})_6](\text{C}_{10}\text{H}_{14}\text{N}_2\text{O}_8)$                                                                         |
| BIKRAO | 2.179 Å | Cingi, M. B.; Lanfredi, A. M. M.; Tiripicchio, A.; Bandoli, G.; Clemente, D. A. <i>Inorg. Chim. Acta</i> <b>1981</b> , <i>52</i> , 237. $[\text{Mn}(\text{H}_2\text{O})_6]\text{I}_3\text{I} \cdot 2(\text{C}_8\text{H}_{10}\text{N}_4\text{O}_2)$                      |
| BURSEN | 2.179 Å | Kostakis, G. E.; Mondal, K. C.; Anson, C. E.; Powell, A. K. <i>Polyhedron</i> <b>2010</b> , <i>29</i> , 24. $[\text{Mn}(\text{H}_2\text{O})_6](\text{C}_8\text{H}_5\text{N}_8)_2 \cdot 2\text{H}_2\text{O}$                                                             |
| CIPMAQ | 2.179 Å | Wang, P.; Ma, J.-P.; Dong, Y.-B.; Huang R.-Q. <i>J. Am. Chem. Soc.</i> <b>2007</b> , <i>129</i> , 10620. $[\text{Mn}(\text{H}_2\text{O})_6][\text{Mn}(\text{H}_2\text{O})_6][\text{Gd}_2\text{C}_{64}\text{H}_{40}\text{N}_{16}\text{O}_{16}] \cdot \text{H}_2\text{O}$ |
| DAMXUL | 2.179 Å | Xiang Ge; Jie Sun; Yue-Qing Zheng <i>Z. Kristallogr. - New Cryst. Struct.</i> <b>2004</b> , <i>219</i> , 237. $[\text{Mn}(\text{H}_2\text{O})_6](\text{O}_2\text{CCH}_2\text{CO}_2)_2 \cdot 2(\text{C}_6\text{H}_{12}\text{N}_4) \cdot 4\text{H}_2\text{O}$             |
| ILULEG | 2.179 Å | Patrick, B. O.; Stevens, C. L.; Storr, A.; Thompson, R. C. <i>Polyhedron</i> <b>2003</b> , <i>22</i> , 3025. $[\text{Mn}(\text{H}_2\text{O})_6][\text{CuC}_{14}\text{H}_6\text{N}_2\text{O}_8] \cdot 2\text{H}_2\text{O}$                                               |
| JIRQUX | 2.179 Å | Genther, D. J.; Squattrito, P. J.; Kirschbaum, K.; Yearley, E. J.; Pinkerton, A. A. <i>Acta Crystallogr., Sect. E</i> <b>2007</b> , <i>63</i> , m604. $[\text{Mn}(\text{H}_2\text{O})_6](\text{C}_{10}\text{H}_8\text{NO}_3\text{S})_2 \cdot 3\text{H}_2\text{O}$       |
| SIVRAQ | 2.179 Å | Hosein, H.-A.; Hall, L. A.; Lough, A. J.; Desmarais, W.; Vela, M. J.; Foxman, B. M. <i>Inorg. Chem.</i> <b>1998</b> , <i>37</i> , 4184. $[\text{Mn}(\text{H}_2\text{O})_6](\text{C}_4\text{H}_2\text{NO}_3)_2 \cdot 2\text{H}_2\text{O}$                                |
| YADTOO | 2.179 Å | Zhang, L.-W.; Gao, S.; Ng, S. W. <i>Acta Crystallogr., Sect. E</i> <b>2011</b> , <i>67</i> , m1520. $[\text{Mn}(\text{H}_2\text{O})_6](\text{C}_{13}\text{H}_{10}\text{NO}_3)_2 \cdot 2\text{H}_2\text{O}$                                                              |
| YEZSEC | 2.179 Å | Prasad, T. K.; Rajasekharan, M. V.; Costes, J.-P. <i>Angew. Chem., Int. Ed.</i> <b>2007</b> , <i>46</i> , 2851. $[\text{Mn}(\text{H}_2\text{O})_6][\text{Gd}_2\text{Mn}_2\text{C}_{24}\text{H}_{24}\text{O}_{30}] \cdot 6\text{H}_2\text{O}$                            |

|          |         |                                                                                                                                                                                                                                                                                                                                          |
|----------|---------|------------------------------------------------------------------------------------------------------------------------------------------------------------------------------------------------------------------------------------------------------------------------------------------------------------------------------------------|
| DIQKUL03 | 2.180 Å | Capelli, S. C.; Falvello, L. R.; Forcen-Vazquez, E.; McIntyre, G. J.; Palacio, F.; Sanz, S.; Tomas, M. <i>Angew. Chem., Int. Ed.</i> <b>2013</b> , 52, 13463. [Mn(H <sub>2</sub> O) <sub>6</sub> ][Mn(H <sub>2</sub> O) <sub>6</sub> ] <sub>2</sub> [Mn <sub>6</sub> C <sub>24</sub> H <sub>34</sub> O <sub>37</sub> ]·8H <sub>2</sub> O |
| LEZBUP   | 2.180 Å | Maldonado, C. R.; Quiros, M.; Salas, J. M. <i>Dalton Trans.</i> <b>2012</b> , 41, 10390. [Mn(H <sub>2</sub> O) <sub>6</sub> ](C <sub>6</sub> H <sub>6</sub> N <sub>5</sub> O <sub>2</sub> ) <sub>2</sub> ·C <sub>12</sub> H <sub>12</sub> N <sub>2</sub>                                                                                 |
| RODSIN   | 2.180 Å | Kurawa, M. A.; Adams, C. J.; Orpen, A. G. <i>Acta Crystallogr., Sect. E</i> <b>2008</b> , 64, m1005. [Mn(H <sub>2</sub> O) <sub>6</sub> ](C <sub>6</sub> H <sub>8</sub> N <sub>4</sub> )(SO <sub>4</sub> ) <sub>2</sub>                                                                                                                  |
| SOVLEV   | 2.180 Å | Wang, M.; Ma, C.-B.; Li, X.-Y.; Chen, C.-N.; Liu, Q.-T. <i>J. Mol. Struct.</i> <b>2009</b> , 920, 242. [Mn(H <sub>2</sub> O) <sub>6</sub> ]((CH <sub>3</sub> ) <sub>3</sub> CPO <sub>2</sub> (OH)) <sub>2</sub> ·6H <sub>2</sub> O                                                                                                       |
| 14378    | 2.181 Å | Montgomery, H.; Chastain, R. V.; Lingafelter, E. C. <i>Acta Crystallogr.</i> <b>1966</b> , 20, 731. (NH <sub>4</sub> ) <sub>2</sub> [Mn(H <sub>2</sub> O) <sub>6</sub> ](SO <sub>4</sub> ) <sub>2</sub>                                                                                                                                  |
| 22367    | 2.181 Å | Ribar, B.; Petrovic, D.; Djuric, S.; Krstanovic, I. Z. <i>Kristallogr., Kristallgeom., Kristallphys., Kristallchem.</i> <b>1976</b> , 144, 334. [Mn(H <sub>2</sub> O) <sub>6</sub> ](NO <sub>3</sub> ) <sub>2</sub>                                                                                                                      |
| 250493   | 2.181 Å | Liu, B.; Jia, Y.-Y.; Yang, H.-Q.; Yang, J.-H.; Xue, G.-L. <i>Dalton Trans.</i> <b>2013</b> , 42, 16742. [Mn(H <sub>2</sub> O) <sub>6</sub> ][LaMn(H <sub>2</sub> O) <sub>2</sub> Ru <sub>2</sub> CO <sub>3</sub> ] <sub>4</sub> Cl <sub>2</sub> ]·4H <sub>2</sub> O                                                                      |
| CIPLUJ   | 2.181 Å | Wang, P.; Ma, J.-P.; Dong, Y.-B.; Huang R.-Q. <i>J. Am. Chem. Soc.</i> <b>2007</b> , 129, 10620. [Mn(H <sub>2</sub> O) <sub>6</sub> ][La <sub>2</sub> C <sub>64</sub> H <sub>40</sub> N <sub>16</sub> O <sub>16</sub> ]·H <sub>2</sub> O                                                                                                 |
| DUJXEM   | 2.181 Å | Huo, L.-H.; Gao, S.; Ng, S. W. <i>Acta Crystallogr., Sect. E</i> <b>2009</b> , 65, m1504. [Mn(H <sub>2</sub> O) <sub>6</sub> ][Mn(H <sub>2</sub> O) <sub>4</sub> (C <sub>4</sub> H <sub>5</sub> N <sub>3</sub> ) <sub>2</sub> ](SO <sub>4</sub> ) <sub>2</sub> ·2H <sub>2</sub> O                                                        |
| AWAHEM   | 2.182 Å | Alsobrook, A. N.; Alekseev, E. V.; Depmeier, W.; Albrecht-Schmitt, T. E. <i>Cryst. Growth Des.</i> <b>2011</b> , 11, 2358. [Mn(H <sub>2</sub> O) <sub>6</sub> ][Mn <sub>3</sub> U <sub>5</sub> C <sub>12</sub> H <sub>24</sub> O <sub>46</sub> P <sub>6</sub> ]·3.75H <sub>2</sub> O                                                     |
| EXENOK   | 2.182 Å | Yi He; Hui-Zhong Kou; Ming Xiong; Ru-Ji Wang <i>Jiegou Huaxue</i> <b>2004</b> , 23, 574. [Mn(H <sub>2</sub> O) <sub>6</sub> ][Cu <sub>3</sub> MnC <sub>30</sub> H <sub>54</sub> N <sub>12</sub> O <sub>6</sub> ](ClO <sub>4</sub> ) <sub>2</sub> ·2CH <sub>3</sub> CN·4H <sub>2</sub> O                                                  |
| IDAGEB   | 2.182 Å | Hajlaoui, F.; Naili, H.; Yahyaoui, S.; Turnbull, M. M.; Mhiri, T.; Bataille, T. <i>Dalton Trans.</i> <b>2011</b> , 40, 11613. [Mn(H <sub>2</sub> O) <sub>6</sub> ](C <sub>5</sub> H <sub>14</sub> N <sub>2</sub> )(SO <sub>4</sub> ) <sub>2</sub>                                                                                        |
| LALVUP01 | 2.182 Å | Huang, X.; Gu, X.; Zhang, H.; Shen, G.; Gong, S.; Yang, B.; Wang, Y. Chen, Y. <i>J. CO<sub>2</sub> Utilization</i> <b>2021</b> , 45, 101419. ((CH <sub>3</sub> ) <sub>4</sub> N) <sub>2</sub> [Mn(H <sub>2</sub> O) <sub>6</sub> ] <sub>2</sub> [V <sub>10</sub> O <sub>28</sub> ]·2H <sub>2</sub> O                                     |
| NUNPAO   | 2.182 Å | Lei, L.-W.; Jiang, Y.-Z.; Zou, Y. <i>Acta Crystallogr., Sect. E</i> <b>2010</b> , 66, m520. [Mn(H <sub>2</sub> O) <sub>6</sub> ][CuC <sub>12</sub> H <sub>11</sub> N <sub>2</sub> O <sub>5</sub> ] <sub>2</sub> ·6H <sub>2</sub> O                                                                                                       |
| VAQDEY   | 2.182 Å | Hajlaoui, F.; Naili, H.; Yahyaoui, S.; Norquist, A. J.; Mhiri, T.; Bataille, T. <i>J. Organometal. Chem.</i> <b>2012</b> , 700, 110. [Mn(H <sub>2</sub> O) <sub>6</sub> ](C <sub>5</sub> H <sub>14</sub> N <sub>2</sub> )(SO <sub>4</sub> ) <sub>2</sub>                                                                                 |
| VAQFAW   | 2.182 Å | Hajlaoui, F.; Naili, H.; Yahyaoui, S.; Norquist, A. J.; Mhiri, T.; Bataille, T. <i>J. Organometal. Chem.</i> <b>2012</b> , 700, 110. [Mn(H <sub>2</sub> O) <sub>6</sub> ](C <sub>5</sub> H <sub>14</sub> N <sub>2</sub> )(SO <sub>4</sub> ) <sub>2</sub>                                                                                 |

|          |         |                                                                                                                                                                                                                                                                                                                    |
|----------|---------|--------------------------------------------------------------------------------------------------------------------------------------------------------------------------------------------------------------------------------------------------------------------------------------------------------------------|
| ZITLOF   | 2.182 Å | Capelli, S. C.; Falvello, L. R.; Forcen-Vazquez, E.; McIntyre, G. J.; Palacio, F.; Sanz, S.; Tomas, M. <i>Angew. Chem., Int. Ed.</i> <b>2013</b> , 52, 13463. $[\text{Mn}(\text{H}_2\text{O})_6]_2[\text{Mn}_6\text{C}_{24}\text{H}_{34}\text{O}_{37}] \cdot 5\text{H}_2\text{O}$                                  |
| 61676    | 2.183 Å | Villella, M.; Faggiani, R.; Brown, I. D. <i>Acta Crystallogr., Sect. C</i> <b>1986</b> , 42, 771. $[\text{Mn}(\text{H}_2\text{O})_6][\text{ZnBr}_4]$                                                                                                                                                               |
| DIQKUL02 | 2.183 Å | Capelli, S. C.; Falvello, L. R.; Forcen-Vazquez, E.; McIntyre, G. J.; Palacio, F.; Sanz, S.; Tomas, M. <i>Angew. Chem., Int. Ed.</i> <b>2013</b> , 52, 13463. $[\text{Mn}(\text{H}_2\text{O})_6][\text{Mn}(\text{H}_2\text{O})_6]_2[\text{Mn}_6\text{C}_{24}\text{H}_{34}\text{O}_{37}] \cdot 8\text{H}_2\text{O}$ |
| EQIMOJ   | 2.183 Å | Zhao, G.; Liu, W.; Yuan, F.; Liu, J. <i>New. J. Chem.</i> <b>2021</b> , 45, 6787. $[\text{Mn}(\text{H}_2\text{O})_6](\text{C}_6\text{H}_2\text{O}_4\text{S}) \cdot 2(\text{C}_{12}\text{H}_{10}\text{N}_2\text{O}_2) \cdot 3\text{H}_2\text{O}$                                                                    |
| EQIMUP   | 2.183 Å | Zhao, G.; Liu, W.; Yuan, F.; Liu, J. <i>New. J. Chem.</i> <b>2021</b> , 45, 6787. $[\text{Mn}(\text{H}_2\text{O})_6](\text{C}_8\text{H}_4\text{O}_4) \cdot 2(\text{C}_{12}\text{H}_{10}\text{N}_2\text{O}_2) \cdot 2\text{H}_2\text{O}$                                                                            |
| EQINAW   | 2.183 Å | Zhao, G.; Liu, W.; Yuan, F.; Liu, J. <i>New. J. Chem.</i> <b>2021</b> , 45, 6787. $[\text{Mn}(\text{H}_2\text{O})_6](\text{C}_8\text{H}_4\text{O}_4) \cdot 2(\text{C}_{12}\text{H}_{10}\text{N}_2\text{O}_2) \cdot 2\text{H}_2\text{O}$                                                                            |
| KAGMOV   | 2.183 Å | Ma, J.-F.; Yang, J.; Liu, J.-F. <i>Acta Crystallogr., Sect. E</i> <b>2003</b> , 59, m478. $[\text{Mn}(\text{H}_2\text{O})_6](\text{C}_7\text{H}_5\text{O}_6\text{S})_2 \cdot 2\text{H}_2\text{O}$                                                                                                                  |
| MEHKUG   | 2.183 Å | Jebas, S. R.; Nayagam, B. R. D.; Balasubramanian, T. <i>Acta Crystallogr., Sect. E</i> <b>2006</b> , 62, m1069. $[\text{Mn}(\text{H}_2\text{O})_6](\text{C}_7\text{H}_6\text{NO}_3\text{S})_2$                                                                                                                     |
| PEGLUI   | 2.183 Å | Auerbach, U.; Stockheim, C.; Weyhermuller, T.; Wieghardt, K.; Nuber, B. <i>Angew. Chem., Int. Ed.</i> <b>1993</b> , 32, 714. $[\text{Mn}(\text{H}_2\text{O})_6](\text{C}_{24}\text{H}_{20}\text{B})_2 \cdot 2[\text{CrC}_{39}\text{H}_{54}\text{N}_3\text{O}_3] \cdot 4\text{CH}_3\text{COCH}_3$                   |
| WEWZEE   | 2.183 Å | Rekik, W.; Naili, H.; Mhiri, T.; Bataille, T. <i>J. Chem. Cryst.</i> <b>2007</b> , 37, 147. $[\text{Mn}(\text{H}_2\text{O})_6](\text{C}_6\text{H}_{14}\text{N}_2)(\text{SO}_4)_2$                                                                                                                                  |
| KAFKUA   | 2.184 Å | Kerber, W. D.; Goheen, J. T.; Perez, K. A.; Siegler, M. A. <i>Inorg. Chem.</i> <b>2016</b> , 55, 848. $[\text{Mn}(\text{H}_2\text{O})_6][\text{Mn}_2\text{C}_{16}\text{H}_{22}\text{FN}_2\text{O}_{13}]_2 \cdot 14\text{H}_2\text{O}$                                                                              |
| UMAPAZ   | 2.184 Å | Dalrymple, S. A.; Shimizu, G. K. H. <i>Supramol. Chem.</i> <b>2003</b> , 15, 591. $[\text{Mn}(\text{H}_2\text{O})_6]_3(\text{C}_{12}\text{H}_{12}\text{O}_{18}\text{S}_6)_3 \cdot \text{C}_4\text{H}_8\text{O}_2$                                                                                                  |
| 110329   | 2.185 Å | Shan Yongkui; Huang Songping <i>J. Chem. Cryst.</i> <b>1999</b> , 29, 93. $(\text{CH}_3)_4\text{N})_2[\text{Mn}(\text{H}_2\text{O})_6][\text{V}_{10}\text{O}_{28}] \cdot 2\text{H}_2\text{O}$                                                                                                                      |
| 424951   | 2.185 Å | Mestiri, I.; Ayed, B.; Haddad, A. <i>J. Cluster Sci.</i> <b>2013</b> , 24, 85. $(\text{NH}_4)_2[\text{Mn}(\text{H}_2\text{O})_6][\text{V}_{10}\text{O}_{28}] \cdot 4\text{H}_2\text{O}$                                                                                                                            |
| CICRAH10 | 2.185 Å | Sabat, M.; Cini, R.; Haromy, T.; Sundaralingam M. <i>Biochemistry</i> <b>1985</b> , 24, 7827. $[\text{Mn}(\text{H}_2\text{O})_6]$                                                                                                                                                                                  |
| CIPMIY   | 2.185 Å | Wang, P.; Ma, J.-P.; Dong, Y.-B.; Huang R.-Q. <i>J. Am. Chem. Soc.</i> <b>2007</b> , 129, 10620. $[\text{Mn}(\text{H}_2\text{O})_6][\text{TbC}_{64}\text{H}_{40}\text{N}_{16}\text{O}_{16}] \cdot 0.5\text{H}_2\text{O}$                                                                                           |
| DEBRAH   | 2.185 Å | Li, D.-P.; Xu, Z.-H.; Ye, L.-W.; Cao, T.-F.; Zhuang, X.-X. <i>Chin. J. Struct. Chem.</i> <b>2021</b> , 40, 1169. $[\text{Mn}(\text{H}_2\text{O})_6][\text{Mn}(\text{H}_2\text{O})_4(\text{C}_6\text{H}_{12}\text{N}_4)_2](\text{SO}_4)_2 \cdot 6\text{H}_2\text{O}$                                                |
| LALVUP   | 2.185 Å | Yongkui Shan; Songping D. Huang <i>J. Chem. Cryst.</i> <b>1999</b> , 29, 93. $(\text{N}(\text{CH}_3)_4)_2[\text{Mn}(\text{H}_2\text{O})_6][\text{V}_{10}\text{O}_{28}] \cdot 2\text{H}_2\text{O}$                                                                                                                  |
| SIDJOF   | 2.185 Å | Sun, R.; Li, Y.-Z.; Bai, J.; Pan, Y. <i>Cryst. Growth Des.</i> <b>2007</b> , 7, 890. $[\text{Mn}(\text{H}_2\text{O})_6][\text{Mn}_2\text{C}_{30}\text{H}_{36}\text{N}_6\text{O}_{24}] \cdot 3\text{H}_2\text{O}$                                                                                                   |
| UVOQIH   | 2.185 Å | Hassan, D. B.; Rekik, W.; Roza, A. O.; Mefteh, F. B.; Roisnel, T.; Bataille, T.; Naili, H. <i>Polyhedron</i> <b>2016</b> , 119, 238. $[\text{Mn}(\text{H}_2\text{O})_6](\text{C}_4\text{H}_{12}\text{N}_2)_3(\text{NO}_3)_8$                                                                                       |

|                  |                    |                                                                                                                                                                                                                                                                                                                                                                                               |
|------------------|--------------------|-----------------------------------------------------------------------------------------------------------------------------------------------------------------------------------------------------------------------------------------------------------------------------------------------------------------------------------------------------------------------------------------------|
| ATUNAE           | 2.186 Å            | Liu, J.-W.; Gao, S.; Huo, L.-I.; Hui ; Zhao, H.; Ng; S. W. <i>Acta Crystallogr., Sect. E</i> <b>2004</b> , <i>60</i> , m517. [Mn(H <sub>2</sub> O) <sub>6</sub> ](C <sub>10</sub> H <sub>8</sub> O <sub>6</sub> )                                                                                                                                                                             |
| AWAHEM           | 2.186 Å            | Alsobrook, A. N.; Alekseev, E. V.; Depmeier, W.; Albrecht-Schmitt, T. E. <i>Cryst. Growth Des.</i> <b>2011</b> , <i>11</i> , 2358. [Mn(H <sub>2</sub> O) <sub>6</sub> ][Mn <sub>3</sub> UC <sub>12</sub> H <sub>24</sub> O <sub>46</sub> P <sub>6</sub> ]·3.75H <sub>2</sub> O                                                                                                                |
| COLWUV           | 2.186 Å            | Shnulin, A. N.; Nadzhafov, G. N.; Mamedov, K. S. <i>Zh. Strukt. Khim.</i> <b>1984</b> , <i>25</i> , 91-3. [Mn(H <sub>2</sub> O) <sub>6</sub> ](C <sub>7</sub> H <sub>5</sub> O <sub>3</sub> ) <sub>2</sub> ·2H <sub>2</sub> O                                                                                                                                                                 |
| IYOHOW           | 2.186 Å            | Surinwong, A. ; Kuwamura, N. ; Kojima, T. ; Yoshinari, N. ; Rujiwatra, A. ; Konno, T. <i>Inorg. Chem.</i> <b>2021</b> , <i>60</i> , 12555. [[Mn(H <sub>2</sub> O) <sub>6</sub> ] <sub>3</sub> [Au <sub>3</sub> Co <sub>2</sub> C <sub>30</sub> H <sub>60</sub> N <sub>6</sub> O <sub>12</sub> S <sub>6</sub> ] <sub>2</sub>                                                                   |
| WIFZEQ01         | 2.187 Å            | Li-Ya Wang; Yu Zhu; Chen-Xia Du; Huai-Bo Ma <i>J. Mol.Struc.</i> <b>2002</b> , <i>610</i> , 191. [Mn(H <sub>2</sub> O) <sub>6</sub> ](C <sub>10</sub> H <sub>4</sub> O <sub>8</sub> )                                                                                                                                                                                                         |
| ILAGAD           | 2.188 Å            | Tretyakov, E. V.; Fokin, S. V.; Romanenko, G. V.; Ovcharenko, V. I. <i>Polyhedron</i> <b>2003</b> , <i>22</i> , 1965. [Mn(H <sub>2</sub> O) <sub>6</sub> ][Mn <sub>2</sub> C <sub>24</sub> H <sub>36</sub> N <sub>18</sub> O <sub>6</sub> ] <sub>2</sub>                                                                                                                                      |
| OCMNHP           | 2.189 Å            | Vance Jr., T. B.; Holt, E. M.; Varie, D. L.; Holt, S. L. <i>Acta Crystallogr., Sect. B</i> <b>1980</b> , <i>36</i> , 153. [Mn(H <sub>2</sub> O) <sub>6</sub> ](ClO <sub>4</sub> ) <sub>2</sub> ·C <sub>12</sub> H <sub>24</sub> O <sub>6</sub>                                                                                                                                                |
| WUYHON           | 2.189 Å            | Lin-Ping Zhang; Hai-Bin Song; Quan-Min Wang; Mak, T. C. W. <i>Polyhedron</i> <b>2003</b> , <i>22</i> , 811. [Mn(H <sub>2</sub> O) <sub>6</sub> ]Cl <sub>2</sub> ·C <sub>22</sub> H <sub>20</sub> N <sub>2</sub> O <sub>6</sub> ·2H <sub>2</sub> O                                                                                                                                             |
| WIFZEQ<br>430741 | 2.190 Å<br>2.190 Å | Rochon, F. R.; Massarweh G. <i>Inorg. Chim. Acta</i> <b>2000</b> , <i>304</i> , 190. [Mn(H <sub>2</sub> O) <sub>6</sub> ](C <sub>10</sub> H <sub>4</sub> O <sub>8</sub> )                                                                                                                                                                                                                     |
| EMEHIP           |                    | Li, P.; Fan, C.-H.; Ge, J.-F. <i>Z. Kristallogr. – New. Cryst. Struct.</i> <b>2016</b> , <i>231</i> , 533. [Mn(H <sub>2</sub> O) <sub>6</sub> ][MnH <sub>12</sub> B <sub>12</sub> O <sub>26</sub> ]·2H <sub>2</sub> O                                                                                                                                                                         |
| IZOHUC           | 2.191 Å            | Jia, J.; Zhang, Y.; Zhang, P.; Ma, P.; Zhang, D.; Wang, J.; Niu, J. <i>RCS Advances</i> <b>2016</b> , <i>6</i> , 108335. (N(CH <sub>3</sub> ) <sub>4</sub> ) <sub>2</sub> [Mn(H <sub>2</sub> O) <sub>6</sub> ] <sub>2</sub> [Mn <sub>6</sub> W <sub>18</sub> Bi <sub>2</sub> C <sub>6</sub> H <sub>20</sub> O <sub>82</sub> ]·12H <sub>2</sub> O                                              |
| DIQKUL           | 2.192 Å            | Capelli, S. C.; Falvello, L. R.; Forcen-Vazquez, E.; McIntyre, G. J.; Palacio, F.; Sanz, S.; Tomas, M. <i>Angew. Chem., Int. Ed.</i> <b>2013</b> , <i>52</i> , 13463. [Mn(H <sub>2</sub> O) <sub>6</sub> ] <sub>2</sub> [Mn <sub>6</sub> C <sub>24</sub> H <sub>34</sub> O <sub>37</sub> ]·8H <sub>2</sub> O                                                                                  |
| MIKHOE           | 2.192 Å            | Sun, W.-W.; Cheng, A.-L.; Jia, Q.-X.; Gao, E.-Q. <i>Inorg. Chem.</i> <b>2007</b> , <i>46</i> , 5471. [Mn(H <sub>2</sub> O) <sub>6</sub> ][Mn <sub>2</sub> C <sub>18</sub> H <sub>6</sub> N <sub>6</sub> O <sub>12</sub> ]                                                                                                                                                                     |
| LIMXOW           | 2.193 Å            | Gao, Q.; Wang, X.; Tapp, J.; Möller, A.; Jacobson, A. J. <i>Inorg. Chem.</i> <b>2013</b> , <i>52</i> , 6610. [Mn(H <sub>2</sub> O) <sub>6</sub> ][Fe <sub>4</sub> Mn <sub>4</sub> Sb <sub>6</sub> C <sub>24</sub> H <sub>28</sub> O <sub>52</sub> ]·10.5H <sub>2</sub> O                                                                                                                      |
| NETPEK           | 2.192 Å            | Shi, J.; Xiong, Y.; Zhou, M. J.; Chen, L.; Xu, Y. <i>RSC Advances</i> <b>2017</b> , <i>7</i> , 55427. Na <sub>6</sub> [Mn(H <sub>2</sub> O) <sub>6</sub> ][MnC <sub>11</sub> H <sub>19</sub> N <sub>7</sub> O <sub>4</sub> ] <sub>4</sub> [Mn <sub>2</sub> W <sub>30</sub> C <sub>22</sub> H <sub>37</sub> N <sub>14</sub> O <sub>116</sub> P <sub>5</sub> ] <sub>2</sub> ·21H <sub>2</sub> O |
| ZOGRAQ           | 2.193 Å            | Sivanesan, D.; Kannan, S.; Thangadurai, T. D.; Jung, K.-D.; Yoon, S. <i>Dalton Trans.</i> <b>2014</b> , <i>43</i> , 11465. [Mn(H <sub>2</sub> O) <sub>6</sub> ](C <sub>19</sub> H <sub>11</sub> F <sub>2</sub> O <sub>2</sub> ) <sub>2</sub> ·2C <sub>4</sub> H <sub>8</sub> O                                                                                                                |
| EBILAE           | 2.194 Å            | Shi, L.-X.; Xu, X.; Wu, C.-D. <i>CrystEngComm</i> <b>2011</b> , <i>13</i> , 6027. [Mn(H <sub>2</sub> O) <sub>6</sub> ][Gd <sub>2</sub> C <sub>18</sub> H <sub>10</sub> N <sub>2</sub> O <sub>20</sub> ]·3H <sub>2</sub> O                                                                                                                                                                     |
| OHITOR           | 2.194 Å            | Qin, H.-F.; Li, Y.; Qin, X.-M.; Li, H.-Y.; Bian, H.-D.; Yu, Q.; Huang, F.-P. <i>J. Coord. Chem.</i> <b>2020</b> , <i>73</i> , 375. [Mn(H <sub>2</sub> O) <sub>6</sub> ][Mn <sub>2</sub> C <sub>18</sub> H <sub>30</sub> N <sub>24</sub> S <sub>6</sub> ] <sub>2</sub> ·H <sub>2</sub> O                                                                                                       |

|             |                               |                                                                                                                                                                                                                                                                                                                                                                                         |
|-------------|-------------------------------|-----------------------------------------------------------------------------------------------------------------------------------------------------------------------------------------------------------------------------------------------------------------------------------------------------------------------------------------------------------------------------------------|
| WOHPUG      | 2.195 Å                       | Kundu, T.; Jana, A. K.; Natarajan, S. <i>Cryst. Growth Des.</i> <b>2014</b> , <i>14</i> , 4531.<br>[Mn(H <sub>2</sub> O) <sub>6</sub> ][Cu <sub>3</sub> MnC <sub>18</sub> H <sub>15</sub> N <sub>3</sub> O <sub>9</sub> S <sub>3</sub> ] <sub>2</sub> ·6H <sub>2</sub> O                                                                                                                |
| EZUTUP      | 2.196 Å                       | Sarma, R.; Baruah, J. B. <i>Inorg. Chim. Acta</i> <b>2011</b> , <i>377</i> , 50. [Mn(H <sub>2</sub> O) <sub>6</sub> ](C <sub>6</sub> H <sub>5</sub> COO) <sub>2</sub> ·4C <sub>10</sub> H <sub>8</sub> N <sub>2</sub> O <sub>2</sub>                                                                                                                                                    |
| NARLAV      | 2.197 Å                       | Yoshida, R.; Ogasahara, S.; Akashi, H.; Shibahara, T. <i>Inorg. Chim. Acta</i> <b>2012</b> , <i>383</i> , 157.<br>[Mn(H <sub>2</sub> O) <sub>6</sub> ][Mo <sub>2</sub> C <sub>6</sub> H <sub>10</sub> N <sub>2</sub> O <sub>6</sub> S <sub>4</sub> ]·H <sub>2</sub> O                                                                                                                   |
| SAPHUP      | 2.197 Å                       | Torres, J.; Gonzalez-Platas, J.; Dominguez, S.; Kremer, C. <i>Commun. Inorg. Synth.</i> <b>2013</b> , <i>1</i> , 24.<br>[Mn(H <sub>2</sub> O) <sub>6</sub> ][MnCeC <sub>12</sub> H <sub>12</sub> O <sub>15</sub> ] <sub>2</sub> ·3H <sub>2</sub> O                                                                                                                                      |
| NUVLEW      | 2.208 Å                       | Fang, X.; Speldrich, M.; Schilder, H.; Cao, R.; O'Halloran, K. P.; Hill, C. L.; Kogerler, P. <i>Chem. Commun.</i> <b>2010</b> , <i>46</i> , 2760. (H <sub>2</sub> N(CH <sub>3</sub> ) <sub>2</sub> ) <sub>16</sub> [Mn(H <sub>2</sub> O) <sub>6</sub> ][Mn <sub>4</sub> W <sub>15</sub> C <sub>6</sub> H <sub>9</sub> O <sub>65</sub> P <sub>2</sub> ] <sub>3</sub> ·48H <sub>2</sub> O |
| TIZSED      | 2.222 Å                       | Didelot, E.; Sadikin, Y.; Lodziana, Z.; Cerny, R. <i>Solid State Sci.</i> <b>2019</b> , <i>90</i> , 86. [Mn(H <sub>2</sub> O) <sub>6</sub> ](H <sub>12</sub> B <sub>12</sub> )                                                                                                                                                                                                          |
| 111999      | 2.265 Å                       | Jørgensen, M.; Lee, Y.-S.; Paskevicius, M.; Hansen, B. R. S.; Jensen, T. R. <i>J. Solid State Chem.</i> <b>2021</b> , <i>298</i> , 122133. [Mn(H <sub>2</sub> O) <sub>6</sub> ]B <sub>10</sub> H <sub>10</sub>                                                                                                                                                                          |
| <b>Mean</b> | <b>2.174 Å/166 structures</b> |                                                                                                                                                                                                                                                                                                                                                                                         |

### Manganese(III)

#### *Six-coordination, octahedral configuration*

| ICSD/CSD code | <i>d</i> (Mn-O) | Reference, compound formula                                                                                                                                                                                                                                                                                                                                  |
|---------------|-----------------|--------------------------------------------------------------------------------------------------------------------------------------------------------------------------------------------------------------------------------------------------------------------------------------------------------------------------------------------------------------|
| 13018         | 1.906 Å         | Chukanov, N. V.; Zubkova, N. V.; Pautov, L. A.; Göttlicher, J.; Kasatkin, A. V.; Van, K. V.; Ksenofontov, D. A.; Pekov, I. V.; Vozchikova, S. A.; Pushcharovsky, D. Y. <i>Phys. Chem. Miner.</i> <b>2019</b> , <i>46</i> , 417. [Mn(H <sub>2</sub> O) <sub>6</sub> ]Ca <sub>3</sub> (SO <sub>4</sub> )(CO <sub>3</sub> )(OH) <sub>6</sub> ·6H <sub>2</sub> O |
| 201212        | 1.991 Å         | Beattie, J. K.; Best, S. P.; Skelton, B. W.; White, A. H. <i>J. Chem. Soc., Dalton Trans.</i> <b>1981</b> , 2105. Cs[Mn(H <sub>2</sub> O) <sub>6</sub> ](SO <sub>4</sub> ) <sub>2</sub> ·6H <sub>2</sub> O                                                                                                                                                   |



**Table S1ar.** Summary of solid state structures containing hydrated iron(II) and iron(III) ions. The ICSD/CDS code refers to the code in the Inorganic Crystal Structure Database (ICSD, number) and Cambridge Structure Database (CSD, letters), respectively, and the mean Fe-O bond distance,  $d(\text{Fe-O})$ . Data in purple text are not included in the mean distance as they are uncertain or differ significantly from the mean value.

## Iron(II)

### *Six-coordination, octahedral configuration*

| ICSD/CSD code | $d(\text{Fe-O})$ | Reference, compound formula                                                                                                                                                                                                                                                                                                   |
|---------------|------------------|-------------------------------------------------------------------------------------------------------------------------------------------------------------------------------------------------------------------------------------------------------------------------------------------------------------------------------|
| 110001        | 2.051 Å          | Zhu H.; Xian D.; Zeng Q.; Wang Z.; Wang D. <i>Acta Crystallogr., Sect. E</i> <b>2003</b> , 59, m1020.                                                                                                                                                                                                                         |
| AMITAR        |                  | $[\text{Fe}(\text{H}_2\text{O})_6(\text{NO}_3)_2((\text{CH}_2)_6\text{N}_4)_2 \cdot 4\text{H}_2\text{O}]$                                                                                                                                                                                                                     |
| FEPPOG        | 2.066 Å          | Gao; H.-L.; Ding, B.; Yi; L.; Cheng; P.; Liao; D.-Z.; Yan; S.-P.; Jiang, Z.-H. <i>Inorg. Chem. Commun.</i> <b>2005</b> , 8, 151. $[\text{Fe}(\text{H}_2\text{O})_6][\text{Fe}_2(\text{C}_{16}\text{H}_{12}\text{N}_2\text{O}_{16})] \cdot 4\text{H}_2\text{O}$                                                                |
| GINVOP        | 2.094 Å          | Deng, Y.-F.; Zhang, H.-L.; Hong, Q.-M.; Weng, W.-Z.; Wan, H.-L.; Zhou, Z.-H. <i>J. Solid State Chem.</i> <b>2007</b> , 180, 3152. $(\text{NH}_4)_2[\text{Fe}(\text{H}_2\text{O})_6][\text{Ti}(\text{C}_6\text{H}_6\text{O}_7)_3] \cdot 6\text{H}_2\text{O}$                                                                   |
| ICEJOQ        | 2.095 Å          | Yuan-Fu Deng, Zhao-Hui Zhou, Hui-Lin Wan <i>Inorg. Chem.</i> <b>2004</b> , 43, 6266.                                                                                                                                                                                                                                          |
| EJATEO        | 2.096 Å          | $(\text{NH}_4)_5[\text{Fe}(\text{H}_2\text{O})_6][\text{Ti}(\text{C}_{18}\text{H}_{18}\text{O}_{21})][\text{Ti}(\text{C}_{18}\text{H}_{15}\text{O}_{21})] \cdot 3\text{H}_2\text{O}$<br>Abu-Shandi, K.; Winkler, H.; Biao Wu; Janiak, C., <i>Cryst. Eng. Comm.</i> <b>2003</b> , 5, 180.                                      |
| 63449         | 2.101 Å          | $[\text{Fe}(\text{H}_2\text{O})_6](\text{C}_4\text{H}_{12}\text{N}_2)_2(\text{HPO}_4)_2$<br>Hoskins, B. F.; Linden, A., <i>Aust. J. Chem.</i> <b>1987</b> , 40, 565. $[\text{Fe}(\text{H}_2\text{O})_6][\text{GeF}_6]$                                                                                                        |
| AJOTAX        | 2.101 Å          | Bolte, M. CCDC deposition number 2001153, <b>2020</b> . $[\text{Fe}(\text{H}_2\text{O})_6](4\text{-SO}_3\text{-C}_6\text{H}_4\text{Cl})_2$                                                                                                                                                                                    |
| UYOSAF        | 2.102 Å          | Yang, Z.; Lu, S.; Lan, L.; Liu, X.; Zhao, S.; Sun, S.; Zhang, Z.; Chen, X.; Yang, Z.; Jia, X. <i>Mol. Cryst. Liq. Cryst.</i> <b>2019</b> , 680, 96. $[\text{Fe}(\text{H}_2\text{O})_6]\text{SO}_4 \cdot \text{H}_2\text{O}$                                                                                                   |
| JOHCIT        | 2.103 Å          | Silva, R. M.; Gwengo, C.; Lindeman, S. V.; Smith, M. D.; Long, G. J.; Grandjean, F.; Gardinier, J. R. <i>Inorg. Chem.</i> <b>2008</b> , 47, 7233. $[[\text{Fe}(\text{H}_2\text{O})_6](\text{BH}(\text{C}_2\text{HN}_2\text{S}_2)_3)_2 \cdot 6\text{H}_2\text{O}]$                                                             |
| 280328        | 2.104 Å          | Hagen, K. S. <i>Inorg. Chem.</i> <b>2000</b> , 39, 5867. $[\text{Fe}(\text{H}_2\text{O})_6](\text{CF}_3\text{SO}_3)_2$                                                                                                                                                                                                        |
| 184623        | 2.104 Å          | Abrahams, B. F.; Abrahams, C. T.; Haywood, M. G.; Hudson, T. A.; Moubaraki, B.; Murray, K. S.; Robson, R. <i>Dalton Trans.</i> <b>2012</b> , 41, 4091. $[\text{Na}(\text{H}_2\text{O})_6][\text{Fe}(\text{H}_2\text{O})_6][(\text{Cu}(\text{SO}_3)_4)_2(\text{Fe}(\text{H}_2\text{O})_3)_3\text{O}] \cdot \text{H}_2\text{O}$ |
| AJOTAX        | 2.104 Å          | Bolte, M. CCDC deposition number 2001153, <b>2020</b> . $[\text{Fe}(\text{H}_2\text{O})_6](4\text{-Cl-C}_6\text{H}_4\text{-SO}_3)_2$                                                                                                                                                                                          |
| DIJRUJ        | 2.104 Å          | Jakonen, M.; Hirva, P.; Nivajarvi, T.; Kallinen, M.; Haukka, M. <i>Eur. J. Inorg. Chem.</i> <b>2007</b> , 3497.                                                                                                                                                                                                               |
| QEDCOR        | 2.105 Å          | $[\text{Fe}(\text{H}_2\text{O})_6][\text{OsCl}_3(\text{CO})_3]_2$<br>Hagen, K. S. <i>Inorg. Chem.</i> <b>2000</b> , 39, 5867. $[\text{Fe}(\text{H}_2\text{O})_6](\text{CF}_3\text{SO}_3)_2$                                                                                                                                   |
| 280328        |                  |                                                                                                                                                                                                                                                                                                                               |

|        |         |                                                                                                                                                                                                                                                                                                                                                                                                                          |
|--------|---------|--------------------------------------------------------------------------------------------------------------------------------------------------------------------------------------------------------------------------------------------------------------------------------------------------------------------------------------------------------------------------------------------------------------------------|
| QUKQIW | 2.106 Å | Fewings, K. R.; Junk, P. C.; Georganopoulou, D.; Prince, P. D.; Steed, J. W., <i>Polyhedron</i> <b>2001</b> , <i>20</i> , 643. [Fe(H <sub>2</sub> O) <sub>6</sub> ](C <sub>7</sub> H <sub>7</sub> SO <sub>3</sub> ) <sub>2</sub>                                                                                                                                                                                         |
| 109429 | 2.108 Å | Kaduk, J. A. <i>Powder Diffraction</i> <b>1999</b> , <i>14</i> , 166. [Fe(H <sub>2</sub> O) <sub>6</sub> ](CF <sub>3</sub> SO <sub>3</sub> ) <sub>2</sub>                                                                                                                                                                                                                                                                |
| EZAWIL | 2.109 Å | Armentano, D.; De Munno, G.; Mastropietro, T. F.; Julve, M.; Lloret, F. <i>Chem. Commun.</i> <b>2004</b> , 1160. (C <sub>2</sub> H <sub>5</sub> NH <sub>3</sub> ) <sub>2</sub> [Fe(H <sub>2</sub> O) <sub>6</sub> ] <sub>2</sub> [Fe <sub>8</sub> C <sub>20</sub> Cl <sub>8</sub> O <sub>42</sub> ]·12H <sub>2</sub> O                                                                                                   |
| 150183 | 2.111 Å | Do, J.; Wang, X.; Jacobson, A. J. <i>J. Solid State Chem.</i> <b>1999</b> , <i>143</i> , 77. (N(CH <sub>3</sub> ) <sub>4</sub> ) <sub>2</sub> [Fe(H <sub>2</sub> O) <sub>6</sub> ][Mo <sub>8</sub> O <sub>26</sub> ]                                                                                                                                                                                                     |
| HIXMOS | 2.111 Å | Yang, D.; Yang, F.-L. <i>Acta Crystallog., Sect. E</i> <b>2014</b> , <i>70</i> , m169. [Fe(H <sub>2</sub> O) <sub>6</sub> ](C <sub>12</sub> H <sub>12</sub> N <sub>2</sub> )(SO <sub>4</sub> ) <sub>2</sub> ·H <sub>2</sub> O                                                                                                                                                                                            |
| KABTOW | 2.111 Å | Do, J.; Wang, X.; Jacobson, A. J., <i>J. Solid State Chem.</i> <b>1999</b> , <i>143</i> , 77. [Fe(H <sub>2</sub> O) <sub>6</sub> ](N(CH <sub>3</sub> ) <sub>4</sub> ) <sub>2</sub> [Mo <sub>8</sub> O <sub>26</sub> ]                                                                                                                                                                                                    |
| WEKXOA | 2.111 Å | Haukka, M.; Jakonen, M.; Nivajarvi, T.; Kallinen, M. <i>Dalton Trans.</i> <b>2006</b> , 3213. [Fe(H <sub>2</sub> O) <sub>6</sub> ][RuCl <sub>3</sub> (CO) <sub>3</sub> ] <sub>2</sub> ·2H <sub>2</sub> O                                                                                                                                                                                                                 |
| YEKPAG | 2.111 Å | Chunyang Jia; Shi-Xia Liu; Ambrus, C.; Labat, G.; Neels, A.; Decurtins, S. <i>Polyhedron</i> <b>2006</b> , <i>25</i> , 1613. (C <sub>18</sub> H <sub>4</sub> N <sub>4</sub> S <sub>4</sub> )[Fe(H <sub>2</sub> O) <sub>6</sub> ][FeBr <sub>4</sub> ] <sub>3</sub>                                                                                                                                                        |
| 99949  | 2.112 Å | Fleck, M.; Bohaty, L.; Tillmanns, E., <i>Solid State Sci.</i> <b>2004</b> , <i>6</i> , 469. (C(NH <sub>2</sub> ) <sub>3</sub> ) <sub>2</sub> [Fe(H <sub>2</sub> O) <sub>6</sub> ](SO <sub>4</sub> ) <sub>2</sub>                                                                                                                                                                                                         |
| DAYCUC | 2.112 Å | Zun-Ting Zhang, Xin-Li Cheng <i>Acta Crystallog., Sect. C</i> <b>2005</b> , <i>61</i> , m529. [Fe(H <sub>2</sub> O) <sub>6</sub> ](C <sub>17</sub> H <sub>13</sub> O <sub>7</sub> S) <sub>2</sub> ·8H <sub>2</sub> O                                                                                                                                                                                                     |
| WAJKAU | 2.112 Å | Fleck, M.; Bohaty, L.; Tillmanns, E. <i>Solid State Sci.</i> <b>2004</b> , <i>6</i> , 469. (CH <sub>6</sub> N <sub>3</sub> ) <sub>2</sub> [Fe(H <sub>2</sub> O) <sub>6</sub> ](SO <sub>4</sub> )                                                                                                                                                                                                                         |
| GIDGUX | 2.113 Å | Ronson, T. K.; Giri, C.; Beyeh, N. K.; Minkkinen, A.; Topic, F.; Holstein, J. J.; Rissanen, K.; Nitschke, J. <i>Chem. Eur. J.</i> <b>2013</b> , <i>19</i> , 3374. ((CH <sub>3</sub> ) <sub>4</sub> N) <sub>1.8</sub> [Fe(H <sub>2</sub> O) <sub>6</sub> ] <sub>1.1</sub> [Fe <sub>4</sub> C <sub>144</sub> H <sub>96</sub> N <sub>24</sub> O <sub>36</sub> S <sub>12</sub> ]·0.1CHCl <sub>3</sub> ·47.27H <sub>2</sub> O |
| PUQWOO | 2.113 Å | Jeremic, D. A.; Kaluderovic, G. N.; Gomez-Ruiz, S.; Brceski, I.; Kasalica, B.; Leovac, V. M. <i>Cryst. Growth Des.</i> <b>2010</b> , <i>10</i> , 559. [Fe(H <sub>2</sub> O) <sub>6</sub> ](C <sub>10</sub> H <sub>15</sub> O <sub>4</sub> S) <sub>2</sub>                                                                                                                                                                |
| TAKVIO | 2.113 Å | Kumar, V.; Fusaro, L.; Aprile, C.; Robeyns, K.; Garcia, Y. <i>Cryst. Growth Des.</i> <b>2020</b> , <i>20</i> , 7850. [Fe(H <sub>2</sub> O) <sub>6</sub> ](4-SO <sub>3</sub> -C <sub>6</sub> H <sub>4</sub> CHCHCOOH) <sub>2</sub> ·2H <sub>2</sub> O                                                                                                                                                                     |
| WAHPIG | 2.113 Å | Boonmak, J.; Nakano, M.; Chaichit, N.; Pakawatchai, C.; Youngme, S. <i>Dalton Trans.</i> <b>2010</b> , <i>39</i> , 8161. [Fe(H <sub>2</sub> O) <sub>6</sub> ][Co(H <sub>2</sub> O) <sub>4</sub> (NC <sub>4</sub> H <sub>5</sub> N <sub>2</sub> ) <sub>2</sub> ](SO <sub>4</sub> ) <sub>2</sub> ·2H <sub>2</sub> O                                                                                                        |
| WEPQOY | 2.113 Å | Zun-Ting Zhang, Xin-Li Cheng, Yun He <i>Acta Crystallog., Sect. C</i> <b>2006</b> , <i>62</i> , m484. (C <sub>4</sub> H <sub>12</sub> N <sub>2</sub> )[Fe(H <sub>2</sub> O) <sub>6</sub> ](SO <sub>4</sub> ) <sub>2</sub>                                                                                                                                                                                                |
| ZUGLAQ | 2.113 Å | Huxel, T.; Skaisgirski, M.; Klingele, J. <i>Polyhedron</i> <b>2015</b> , <i>93</i> , 28. [Fe(H <sub>2</sub> O) <sub>6</sub> ](N(SO <sub>2</sub> CF <sub>3</sub> ) <sub>2</sub> ) <sub>2</sub> ·2H <sub>2</sub> O                                                                                                                                                                                                         |
| NATGEV | 2.114 Å | Yun-Long Fu; Zhi-Wei Xu; Jia-Lin Ren; Ng, S. W. <i>Acta Crystallog., Sect. C</i> <b>2005</b> , <i>61</i> , m1639. (C <sub>10</sub> H <sub>10</sub> N <sub>2</sub> )[Fe(H <sub>2</sub> O) <sub>6</sub> ](SO <sub>4</sub> )·2H <sub>2</sub> O                                                                                                                                                                              |
| XAZLAM | 2.114 Å | Zhi-Wei Xu; Yun-Long Fu; Jia-Lin Ren <i>Acta Crystallog., Sect. E</i> <b>2006</b> , <i>62</i> , m161. (C <sub>10</sub> H <sub>10</sub> N <sub>2</sub> )[Fe(H <sub>2</sub> O) <sub>6</sub> ](SO <sub>4</sub> )·2H <sub>2</sub> O                                                                                                                                                                                          |
| CASHEN | 2.115 Å | Heinemann, F. W.; MCDC deposition number 2155470. [Fe(H <sub>2</sub> O) <sub>6</sub> ][FeC <sub>14</sub> H <sub>20</sub> N <sub>2</sub> O <sub>14</sub> ]·4H <sub>2</sub> O                                                                                                                                                                                                                                              |

|          |         |                                                                                                                                                                                                                                                                                                                                                                                                                                   |
|----------|---------|-----------------------------------------------------------------------------------------------------------------------------------------------------------------------------------------------------------------------------------------------------------------------------------------------------------------------------------------------------------------------------------------------------------------------------------|
| WEKXOA01 | 2.115 Å | Haukka, M.; Jakonen, M.; Nivajarvi, T.; Kallinen, M. <i>Dalton Trans.</i> <b>2006</b> , 3213.<br>[Fe(H <sub>2</sub> O) <sub>6</sub> ][RuCl <sub>3</sub> (CO) <sub>3</sub> ] <sub>2</sub> ·2H <sub>2</sub> O                                                                                                                                                                                                                       |
| 68452    | 2.116 Å | Benghalem, A.; le Blanc, M.; Calage, Y., <i>Acta Crystallog., Sect. C</i> <b>1990</b> , 46, 2453. [Fe(H <sub>2</sub> O) <sub>6</sub> ][SnF <sub>6</sub> ]                                                                                                                                                                                                                                                                         |
| JIZJIM   | 2.116 Å | Yahyaoui, S.; Rezik, W.; Naili, H.; Mhiri, T.; Bataille, T. <i>J. Solid State Chem.</i> <b>2007</b> , 180, 3560.<br>Fe(H <sub>2</sub> O) <sub>6</sub> [(C <sub>6</sub> H <sub>14</sub> N <sub>2</sub> )(SO <sub>4</sub> ) <sub>2</sub> ]                                                                                                                                                                                          |
| DIJRIY   | 2.117 Å | Jakonen, M.; Hirva, P.; Nivajarvi, T.; Kallinen, M.; Haukka, M. <i>Eur. J. Inorg. Chem.</i> <b>2007</b> , 3497.<br>[Fe(H <sub>2</sub> O) <sub>6</sub> ][RuI <sub>3</sub> (CO) <sub>3</sub> ] <sub>2</sub> ·2H <sub>2</sub> O                                                                                                                                                                                                      |
| EJELIO   | 2.117 Å | Honda, K.; Yamwaki, H.; Matsukawa, M.; Goto, M.; Matsunaga, T.; Aoki, K.; Yoshida, M.; Fujiwara, S., <i>Acta Crystallogr. Sect. C</i> <b>2003</b> , 59, m319. [Fe(H <sub>2</sub> O) <sub>6</sub> ](C <sub>6</sub> H <sub>2</sub> N <sub>3</sub> O <sub>7</sub> ) <sub>2</sub> ·2H <sub>2</sub> O                                                                                                                                  |
| ONOTER   | 2.118 Å | Wagner, C.; Merzweiler, K. <i>Z. Anorg. Allg. Chem.</i> <b>2010</b> , 636, 557. [Fe(H <sub>2</sub> O) <sub>6</sub> ](p-HOOC-C <sub>6</sub> H <sub>4</sub> -SO <sub>3</sub> ) <sub>2</sub>                                                                                                                                                                                                                                         |
| CIVCER   | 2.119 Å | Shi, J.; Wang, Y.-C.; Wang, Q.-Y.; Zhang, Z.-T. <i>Inorg. Chim. Acta</i> <b>2014</b> , 409, 259.<br>[Fe(H <sub>2</sub> O) <sub>6</sub> ](C <sub>17</sub> H <sub>12</sub> BrO <sub>9</sub> S) <sub>2</sub> ·2H <sub>2</sub> O                                                                                                                                                                                                      |
| BACVOR   | 2.120 Å | Gaspar, A. B.; Munoz ; M. C.; Real, J. A., <i>C. R. Acad. Sci., Ser. IIC: Chim</i> <b>2001</b> , 4, 193.<br>[Fe(H <sub>2</sub> O) <sub>6</sub> ][Fe(C <sub>6</sub> H <sub>3</sub> NO) <sub>6</sub> ](ClO <sub>4</sub> ) <sub>6</sub>                                                                                                                                                                                              |
| DIMPOE10 | 2.120 Å | Hämäläinen, R.; Turpeinen, U., <i>Acta Chem. Scand.</i> <b>1989</b> , 43, 15. [Fe(H <sub>2</sub> O) <sub>6</sub> ][FeC <sub>18</sub> H <sub>14</sub> N <sub>2</sub> O <sub>6</sub> ] <sub>2</sub> ·2H <sub>2</sub> O                                                                                                                                                                                                              |
| 260555   | 2.121 Å | Becker, E.; Kirchner, K.; Mereiter, K. <i>Acta Crystallogr., Sect. E</i> <b>2009</b> , 65, i71. [Fe(H <sub>2</sub> O) <sub>6</sub> ][FeBr <sub>3</sub> (CO) <sub>3</sub> ] <sub>2</sub>                                                                                                                                                                                                                                           |
| GIDGOR   | 2.121 Å | Ronson, T. K.; Giri, C.; Beyeh, N. K.; Minkinen, A.; Topic, F.; Holstein, J. J.; Rissanen, K.; Nitschke, J. <i>R. Chem. Eur. J.</i> <b>2013</b> , 19, 3374. ((CH <sub>3</sub> ) <sub>4</sub> N) <sub>1.4</sub> [Fe(H <sub>2</sub> O) <sub>6</sub> ] <sub>1.3</sub> [Fe <sub>4</sub> C <sub>144</sub> H <sub>96</sub> N <sub>24</sub> O <sub>36</sub> S <sub>12</sub> ] <sub>1</sub> ·0.12CHCl <sub>3</sub> ·49.68H <sub>2</sub> O |
| GLYCFE02 | 2.121 Å | Shu, X.-G.; Zhang, M.; Fan, M.-Z.; Tian, Y.-B.; Teng, B.; Li, D.-G.; Xu, X.; Wu, C.-L. <i>Jiangxi Nongye Xuebao</i> <b>2014</b> , 26, 103. [Fe(H <sub>2</sub> O) <sub>6</sub> ][Fe(H <sub>2</sub> O) <sub>4</sub> (C <sub>2</sub> H <sub>9</sub> NO <sub>4</sub> )](SO <sub>4</sub> ) <sub>2</sub>                                                                                                                                |
| YUPJOJ   | 2.121 Å | Fiolka, C.; Striebinger, R.; Walter, T.; Walbaum, C.; Pantenburg, I. <i>Z. Anorg. Allg. Chem.</i> <b>2009</b> , 635, 855. [Fe(H <sub>2</sub> O) <sub>6</sub> ](I <sub>3</sub> ) <sub>2</sub> ·6C <sub>8</sub> H <sub>16</sub> O <sub>4</sub>                                                                                                                                                                                      |
| 424299   | 2.122 Å | Zimmermann, L. W.; Schleid, T. <i>Z. Kristallogr. – Cryst. Mater.</i> <b>2013</b> , 228, 558. [Fe(H <sub>2</sub> O) <sub>6</sub> ]B <sub>10</sub> H <sub>10</sub> ·2H <sub>2</sub> O                                                                                                                                                                                                                                              |
| AMAVOB   | 2.122 Å | Bednarchuk, T. J.; Kinzhybalov, V.; Bednarchuk, O.; Pietraszko, A. <i>J. Mol. Struct.</i> <b>2016</b> , 1120, 138.<br>[Fe(H <sub>2</sub> O) <sub>6</sub> ](4-NH <sub>2</sub> C <sub>5</sub> H <sub>5</sub> N) <sub>2</sub> (SO <sub>4</sub> ) <sub>2</sub>                                                                                                                                                                        |
| GLYCFE01 | 2.122 Å | Oguey, S.; Jacquier, Y.; Neels, A.; Stoeckli-Evans, H. CCDC deposition number 936397, <b>2013</b> .<br>[Fe(H <sub>2</sub> O) <sub>6</sub> ][Fe(H <sub>2</sub> O) <sub>4</sub> (C <sub>2</sub> H <sub>9</sub> NO <sub>4</sub> )](SO <sub>4</sub> ) <sub>2</sub>                                                                                                                                                                    |
| PIWKAJ   | 2.122 Å | Zimmermann, L. W.; Schleid, T. <i>Z. Krist. Cryst. Mater.</i> <b>2013</b> , 228, 558. [Fe(H <sub>2</sub> O) <sub>6</sub> ]B <sub>10</sub> H <sub>10</sub> ·2H <sub>2</sub> O                                                                                                                                                                                                                                                      |
| WEKXIU   | 2.122 Å | Haukka, M.; Jakonen, M.; Nivajarvi, T.; Kallinen, M. <i>Dalton Trans.</i> <b>2006</b> , 3213.<br>[Fe(H <sub>2</sub> O) <sub>6</sub> ][RuCl <sub>3</sub> (CO) <sub>3</sub> ] <sub>2</sub>                                                                                                                                                                                                                                          |
| ZOPFUH   | 2.122 Å | Kammoun, O.; Rezik, W.; Naili, H.; Bataille, T. <i>New. J. Chem.</i> <b>2015</b> , 39, 2682.<br>[Fe(H <sub>2</sub> O) <sub>6</sub> ](C <sub>7</sub> H <sub>7</sub> N <sub>2</sub> ) <sub>2</sub> (SO <sub>4</sub> ) <sub>2</sub> ·3H <sub>2</sub> O                                                                                                                                                                               |

|        |         |                                                                                                                                                                                                                                                                                                                                                                                                                                                                                                                                                                                                                                          |
|--------|---------|------------------------------------------------------------------------------------------------------------------------------------------------------------------------------------------------------------------------------------------------------------------------------------------------------------------------------------------------------------------------------------------------------------------------------------------------------------------------------------------------------------------------------------------------------------------------------------------------------------------------------------------|
| FEACIT | 2.123 Å | Stouse, J.; Layten, S. W.; Strouse, C. E., <i>J. Am. Chem. Soc.</i> <b>1977</b> , <i>99</i> , 562.<br>[Fe(H <sub>2</sub> O) <sub>6</sub> ][FeC <sub>6</sub> H <sub>7</sub> O <sub>8</sub> ] <sub>2</sub> ·2H <sub>2</sub> O                                                                                                                                                                                                                                                                                                                                                                                                              |
| 100372 | 2.123 Å | Ghosh, M.; Ray, S., <i>Z. Kristallogr.</i> <b>1981</b> , <i>155</i> , 129-137. [Fe(H <sub>2</sub> O) <sub>6</sub> ](ClO <sub>4</sub> ) <sub>2</sub><br><i>Z. Kristallogr., Kristallgeom., Kristallphys., Kristallchem.</i> <b>1961</b> , <i>115</i> , 97. [Fe(H <sub>2</sub> O) <sub>6</sub> ](ClO <sub>4</sub> ) <sub>2</sub><br><i>Z. Kristallogr.</i> <b>1977</b> , <i>145</i> , 146. [Fe(H <sub>2</sub> O) <sub>6</sub> ](ClO <sub>4</sub> ) <sub>2</sub><br><i>Z. Kristallogr., Kristallgeom., Kristallphys., Kristallchem.</i> <b>1935</b> , <i>91</i> , 480. [Fe(H <sub>2</sub> O) <sub>6</sub> ](ClO <sub>4</sub> ) <sub>2</sub> |
| 172379 | 2.123 Å | Carver, G.; Dobe, C.; Jensen, T. B.; Tregenna-Piggott, P. L. W.; Janssen, S.; Bill, E.; McIntyre, G. J.; Barra, A. L. <i>Inorg. Chem.</i> <b>2006</b> , <i>45</i> , 4695. Cs[Fe(D <sub>2</sub> O) <sub>6</sub> ]PO <sub>4</sub>                                                                                                                                                                                                                                                                                                                                                                                                          |
| IDAGAX | 2.123 Å | Hajlaoui, F.; Naili, H.; Yahyaoui, S.; Turnbull, M. M.; Mhiri, T.; Bataille, T. <i>Dalton Trans.</i> <b>2011</b> , <i>40</i> , 11613. [Fe(H <sub>2</sub> O) <sub>6</sub> ](C <sub>5</sub> H <sub>14</sub> N <sub>2</sub> )(SO <sub>4</sub> ) <sub>2</sub>                                                                                                                                                                                                                                                                                                                                                                                |
| 16589  | 2.124 Å | Baur, W. H., <i>Acta Crystallogr.</i> <b>1964</b> , <i>17</i> , 1167. [Fe(H <sub>2</sub> O) <sub>6</sub> ]SO <sub>4</sub> ·H <sub>2</sub> O                                                                                                                                                                                                                                                                                                                                                                                                                                                                                              |
| 423075 | 2.124 Å | Ganesh, G.; Ramadoss, A.; Kannan, P. S.; SubbiahPandi, A. <i>Pharma Chem.</i> <b>2011</b> , <i>3</i> , 433.<br>(NH <sub>4</sub> ) <sub>2</sub> [Fe(H <sub>2</sub> O) <sub>6</sub> ](SO <sub>4</sub> ) <sub>2</sub>                                                                                                                                                                                                                                                                                                                                                                                                                       |
| AXEHOC | 2.124 Å | Chen, H.-L. ; Dong, Y.-Q. ; Lai, H.-F. ; Wei, L.-Q. ; Qin, Z.-L. ; Yao, D.-M. <i>Hechi Xueyuan Xuebao</i> <b>2016</b> , <i>36</i> , 29. [Fe(H <sub>2</sub> O) <sub>6</sub> ](C <sub>15</sub> H <sub>9</sub> O <sub>7</sub> S) <sub>2</sub> ·2(C <sub>15</sub> H <sub>10</sub> O <sub>7</sub> S)·7H <sub>2</sub> O                                                                                                                                                                                                                                                                                                                        |
| AWAHUC | 2.124 Å | Alsobrook, A. N.; Alekseev, E. V.; Depmeier, W.; Albrecht-Schmitt, T. E. <i>Cryst. Growth Des.</i> <b>2011</b> , <i>11</i> , 2358. [Fe(H <sub>2</sub> O) <sub>6</sub> ][(UO <sub>2</sub> ) <sub>2</sub> C <sub>4</sub> H <sub>4</sub> O <sub>10</sub> P <sub>2</sub> ] <sub>2</sub> ·8H <sub>2</sub> O                                                                                                                                                                                                                                                                                                                                   |
| NOWVEC | 2.124 Å | Said, S.; Naili, H. CCDC deposition number 1039279, <b>2014</b> . [Fe(H <sub>2</sub> O) <sub>6</sub> ](C <sub>5</sub> H <sub>8</sub> N <sub>3</sub> ) <sub>2</sub> (SO <sub>4</sub> ) <sub>2</sub> ·2H <sub>2</sub> O                                                                                                                                                                                                                                                                                                                                                                                                                    |
| WAHPEC | 2.124 Å | Boonmak, J.; Nakano, M. ; Chaichit, N. ; Pakawatchai, C. ; Youngme, S. <i>Dalton Trans.</i> <b>2010</b> , <i>39</i> , 8161.<br>[Fe(H <sub>2</sub> O) <sub>6</sub> ][Fe(H <sub>2</sub> O) <sub>4</sub> (NC <sub>4</sub> H <sub>5</sub> N <sub>2</sub> ) <sub>2</sub> ](SO <sub>4</sub> ) <sub>2</sub> ·2H <sub>2</sub> O                                                                                                                                                                                                                                                                                                                  |
| ZILZID | 2.124 Å | Laine, P.; Gourdon, A.; Launay, J.-P., <i>Inorg. Chem.</i> <b>1995</b> , <i>34</i> , 5138.<br>[Fe(H <sub>2</sub> O) <sub>6</sub> ](NH <sub>4</sub> ) <sub>2</sub> [FeC <sub>14</sub> H <sub>6</sub> N <sub>2</sub> O <sub>8</sub> ] <sub>2</sub> ·2C <sub>7</sub> H <sub>5</sub> NO <sub>4</sub> ·4H <sub>2</sub> O                                                                                                                                                                                                                                                                                                                      |
| 280578 | 2.125 Å | Fronczek, F. R.; Collins, S. N.; Chan, J. Y., <i>Acta Crystallogr., Sect. E</i> <b>2001</b> , <i>57</i> , 26. [Fe(H <sub>2</sub> O) <sub>6</sub> ]SO <sub>4</sub> ·H <sub>2</sub> O                                                                                                                                                                                                                                                                                                                                                                                                                                                      |
| KEKCIO | 2.125 Å | Martsinko, E. E.; Minacheva, L. K.; Pesaroglo, A. G.; Seifullina, I. I.; Churakov, A. V.; Sergienko, V.S. <i>Zh. Neorg. Khim.</i> <b>2011</b> , <i>56</i> , 1313. [Fe(H <sub>2</sub> O) <sub>6</sub> ][Ge(C <sub>6</sub> H <sub>5</sub> O <sub>7</sub> ) <sub>2</sub> ] <sub>2</sub> ·4H <sub>2</sub> O                                                                                                                                                                                                                                                                                                                                  |
| 14346  | 2.126 Å | Montgomery, H.; Chastain, R. V.; Natt, J. J.; Witkowska, A. M.; Lingafelter, E. C., <i>Acta Crystallogr.</i> <b>1967</b> , <i>22</i> , 775. [Fe(H <sub>2</sub> O) <sub>6</sub> ](NH <sub>4</sub> ) <sub>2</sub> (SO <sub>4</sub> ) <sub>2</sub>                                                                                                                                                                                                                                                                                                                                                                                          |
| TIZRAY | 2.126 Å | Didelot, E.; Sadikin, Y.; Lodziana, Z.; Cerny, R. <i>Solid State Sci.</i> <b>2019</b> , <i>90</i> , 86. [Fe(H <sub>2</sub> O) <sub>6</sub> ]B <sub>12</sub> H <sub>12</sub>                                                                                                                                                                                                                                                                                                                                                                                                                                                              |
| UCETAX | 2.127 Å | Chuan-De Wu; You-Hong Guo; Xiang Lin; Sheng Wang; Can-Zhong Lu; Hong-Hui Zhuang, <i>Jiegou Huaxue</i> <b>2000</b> , <i>19</i> , 395. [Fe(H <sub>2</sub> O) <sub>6</sub> ][Mo <sub>2</sub> C <sub>10</sub> H <sub>12</sub> N <sub>2</sub> O <sub>12</sub> ] <sub>2</sub> ·5H <sub>2</sub> O                                                                                                                                                                                                                                                                                                                                               |
| 136877 | 2.128 Å | Wang, S.-Y.; Xin, D.; Zhou, Z.-H. <i>J. Solid State Chem.</i> <b>2022</b> , <i>306</i> , 122784. [Fe(H <sub>2</sub> O) <sub>6</sub> ](HSO <sub>4</sub> ) <sub>2</sub> ·2H <sub>2</sub> O                                                                                                                                                                                                                                                                                                                                                                                                                                                 |
| 172378 | 2.128 Å | Carver, G.; Dobe, C.; Jensen, T. B.; Tregenna-Piggott, P. L. W.; Janssen, S.; Bill, E.; McIntyre, G. J.; Barra, A. L. <i>Inorg. Chem.</i> <b>2006</b> , <i>45</i> , 4695. Cs[Fe(D <sub>2</sub> O) <sub>6</sub> ]PO <sub>4</sub>                                                                                                                                                                                                                                                                                                                                                                                                          |

|        |         |                                                                                                                                                                                                                                                                                                                                                                                                                                                      |
|--------|---------|------------------------------------------------------------------------------------------------------------------------------------------------------------------------------------------------------------------------------------------------------------------------------------------------------------------------------------------------------------------------------------------------------------------------------------------------------|
| AWAHUC | 2.128 Å | Alsobrook, A. N.; Alekseev, E. V.; Depmeier, W.; Albrecht-Schmitt, T. E. <i>Cryst. Growth Des.</i> <b>2011</b> , <i>11</i> , 2358. [Fe(H <sub>2</sub> O) <sub>6</sub> ][(UO <sub>2</sub> ) <sub>2</sub> C <sub>4</sub> H <sub>8</sub> O <sub>12</sub> P <sub>2</sub> ] $\cdot$ 4H <sub>2</sub> O                                                                                                                                                     |
| 409739 | 2.129 Å | Euler, H.; Barbier, B.; Meents, A.; Kirfel, A., <i>Z. Kristallogr. - New Crystal Structures</i> <b>2003</b> , <i>218</i> , 409. Cs <sub>2</sub> [Fe(H <sub>2</sub> O) <sub>6</sub> ](SO <sub>4</sub> ) <sub>2</sub>                                                                                                                                                                                                                                  |
| CEZCOC | 2.129 Å | Tejeda-Serrano, M.; Mon, M.; Ross, B.; Gonell, J.; Ferrando-Soria, J.; Corma, A.; Leyva-Perez, A.; Armentano, D.; Pardo, E. <i>J. Am. Chem. Soc.</i> <b>2018</b> , <i>140</i> , 8827. [Fe <sup>II</sup> (H <sub>2</sub> O) <sub>6</sub> ][Fe <sup>III</sup> (H <sub>2</sub> O) <sub>6</sub> ] <sub>2</sub> [Cu <sub>3</sub> Ni <sub>2</sub> C <sub>39</sub> H <sub>36</sub> N <sub>6</sub> O <sub>21</sub> ] <sub>2</sub> $\cdot$ 66H <sub>2</sub> O |
| KOFVIM | 2.129 Å | Darmograi, G.; Jouffret, L.; Hemon-Ribaud, A.; Leblanc, M.; Maisonneuve, V.; Lhoste, J. <i>Z. Anorg. Allg. Chem.</i> <b>2014</b> , <i>640</i> , 1385. [Fe(H <sub>2</sub> O) <sub>6</sub> ](C <sub>6</sub> H <sub>3</sub> N <sub>2</sub> )[FeF <sub>6</sub> ]                                                                                                                                                                                         |
| VAQDUO | 2.129 Å | Hajlaoui, F.; Naili, H.; Yahyaoui, S.; Norquist, A. J.; Mhiri, T.; Bataille, T. <i>J. Organometal. Chem.</i> <b>2012</b> , <i>700</i> , 110. [Fe(H <sub>2</sub> O) <sub>6</sub> ](C <sub>5</sub> H <sub>14</sub> N <sub>2</sub> )(SO <sub>4</sub> ) <sub>2</sub>                                                                                                                                                                                     |
| 409493 | 2.130 Å | Euler, H.; Barbier, B.; Klumpp, S.; Kirfel, A., <i>Z. Kristallogr. - New Crystal Structures</i> <b>2000</b> , <i>215</i> , 473. Rb <sub>2</sub> [Fe(H <sub>2</sub> O) <sub>6</sub> ](SO <sub>4</sub> ) <sub>2</sub>                                                                                                                                                                                                                                  |
| 409984 | 2.130 Å | Euler, H.; Barbier, B.; Meents, A.; Kirfel, A. <i>Z. Kristallogr. - New Crystal Structures</i> <b>2009</b> , <i>224</i> , 171. K <sub>2</sub> [Fe(H <sub>2</sub> O) <sub>6</sub> ](SO <sub>4</sub> ) <sub>2</sub>                                                                                                                                                                                                                                    |
| 710004 | 2.130 Å | Euler, H.; Barbier, B.; Meents, A.; Kirfel, A. <i>Z. Kristallogr. - New Crystal Structures</i> <b>2009</b> , <i>224</i> , 355. Tl <sub>2</sub> [Fe(H <sub>2</sub> O) <sub>6</sub> ](SO <sub>4</sub> ) <sub>2</sub>                                                                                                                                                                                                                                   |
| GOLSUX | 2.130 Å | Soares Jr., A. L.; Junior, A. R. F.; Diniz, R.; Leitao, A. A.; de Oliveira, L. F. C. CCDC deposition number 776414, <b>2010</b> . [Fe(H <sub>2</sub> O) <sub>6</sub> ](2,5-(HOOC)-1,4-(OOC)-C <sub>6</sub> H <sub>2</sub> )                                                                                                                                                                                                                          |
| KAFKOU | 2.130 Å | Kerber, W. D.; Goheen, J. T.; Perez, K. A.; Siegler, M. A. <i>Inorg. Chem.</i> <b>2016</b> , <i>55</i> , 848. [Fe(H <sub>2</sub> O) <sub>6</sub> ][Fe <sub>2</sub> (H <sub>2</sub> O) <sub>4</sub> C <sub>16</sub> H <sub>14</sub> FN <sub>2</sub> O <sub>9</sub> ] <sub>2</sub> $\cdot$ 14H <sub>2</sub> O                                                                                                                                          |
| GIDHAE | 2.131 Å | Ronson, T. K.; Giri, C.; Beyeh, N. K.; Minkinen, A.; Topic, F.; Holstein, J. J.; Rissanen, K.; Nitschke, J. <i>R. Chem. Eur. J.</i> <b>2013</b> , <i>19</i> , 3374. [Fe(H <sub>2</sub> O) <sub>6</sub> ] <sub>2</sub> [Fe <sub>4</sub> C <sub>144</sub> H <sub>96</sub> N <sub>24</sub> O <sub>36</sub> S <sub>12</sub> ] $\cdot$ 49.68H <sub>2</sub> O                                                                                              |
| 163595 | 2.132 Å | Capobianchi, A.; Colapietro, M.; Fiorani, D.; Foglia, S.; Imperatori, P.; Laureti, S.; Palange, E. <i>Chem. Mater.</i> <b>2009</b> , <i>21</i> , 2007. [Fe(H <sub>2</sub> O) <sub>6</sub> ](PtCl <sub>6</sub> )                                                                                                                                                                                                                                      |
| 420080 | 2.132 Å | Capobianchi, A.; Campi, G.; Camalli, M.; Veroli, C. <i>Z. Kristallogr.</i> <b>2009</b> , <i>224</i> , 384. [Fe(H <sub>2</sub> O) <sub>6</sub> ](PtCl <sub>6</sub> )                                                                                                                                                                                                                                                                                  |
| FEMTAT | 2.132 Å | Sungho Yoon, S.J. Lippard <i>J. Am. Chem. Soc.</i> <b>2004</b> , <i>126</i> , 16692. [Fe(H <sub>2</sub> O) <sub>6</sub> ](C <sub>19</sub> F <sub>11</sub> F <sub>2</sub> O <sub>2</sub> ) <sub>2</sub> $\cdot$ 2C <sub>4</sub> H <sub>8</sub> O                                                                                                                                                                                                      |
| 172062 | 2.135 Å | Ballirano, P.; Belardi, G. <i>Acta Crystallogr., Sect. E</i> <b>2006</b> , <i>62</i> , i58. K <sub>2</sub> [Fe(H <sub>2</sub> O) <sub>6</sub> ](SO <sub>4</sub> ) <sub>2</sub>                                                                                                                                                                                                                                                                       |
| JEYPIN | 2.135 Å | Cakir, S.; Bicer, E.; Aoki, K.; Coskun, E. <i>Cryst. Res. Technol.</i> <b>2006</b> , <i>41</i> , 314. [Fe(H <sub>2</sub> O) <sub>6</sub> ][Fe(C <sub>12</sub> H <sub>20</sub> N <sub>4</sub> O <sub>6</sub> )(SO <sub>4</sub> ) <sub>2</sub> ] $\cdot$ 2H <sub>2</sub> O                                                                                                                                                                             |
| 162314 | 2.136 Å | Bosi, F.; Belardi, G.; Ballirano, P. <i>Am. Mineral.</i> <b>2009</b> , <i>94</i> , 74. K <sub>2</sub> [Fe(H <sub>2</sub> O) <sub>6</sub> ](SO <sub>4</sub> ) <sub>2</sub>                                                                                                                                                                                                                                                                            |
| CEYRIH | 2.136 Å | Ruiz-Valero, C.; Monge, A.; Gutierrez-Puebla, E.; Gutierrez-Rios, E., <i>Acta Crystallogr. Sect. C</i> <b>1984</b> , <i>40</i> , 811. [Fe(H <sub>2</sub> O) <sub>6</sub> ][FeC <sub>18</sub> H <sub>18</sub> N <sub>9</sub> O <sub>12</sub> ] <sub>2</sub> $\cdot$ 12H <sub>2</sub> O                                                                                                                                                                |

|          |         |                                                                                                                                                                                                                                                                               |
|----------|---------|-------------------------------------------------------------------------------------------------------------------------------------------------------------------------------------------------------------------------------------------------------------------------------|
| AVISAA   | 2.137 Å | Hatfield, T. L.; Staples, R. J.; Pierce, D. T. <i>Inorg. Chem.</i> <b>2010</b> , <i>49</i> , 9312. [Fe(H <sub>2</sub> O) <sub>6</sub> ][FeC <sub>12</sub> H <sub>18</sub> N <sub>3</sub> O <sub>6</sub> ] <sub>2</sub>                                                        |
| FESRAX   | 2.138 Å | Noro, S.; Kitagawa, S.; Wada, T. <i>Inorg. Chim. Acta</i> <b>2005</b> , <i>358</i> , 423. [Fe(H <sub>2</sub> O) <sub>6</sub> ] <sub>2</sub> [Cu <sub>2</sub> (C <sub>28</sub> H <sub>12</sub> N <sub>4</sub> O <sub>16</sub> )]                                               |
| 23885    | 2.140 Å | Hamilton, W. C., <i>Acta Crystallogr.</i> <b>1962</b> , <i>15</i> , 353. [Fe(H <sub>2</sub> O) <sub>6</sub> ][SiF <sub>6</sub> ]                                                                                                                                              |
| 172377   | 2.141 Å | Carver, G.; Dobe, C.; Jensen, T. B.; Tregenna-Piggott, P. L. W.; Janssen, S.; Bill, E.; McIntyre, G. J.; Barra, A. L. <i>Inorg. Chem.</i> <b>2006</b> , <i>45</i> , 4695. Cs[Fe(H <sub>2</sub> O) <sub>6</sub> ]PO <sub>4</sub>                                               |
| 41535    | 2.143 Å | Chevrier, G.; Hardy, A.; Jehanno, G., <i>Acta Crystallogr., Sect. A</i> <b>1981</b> , <i>37</i> , 578. [Fe(H <sub>2</sub> O) <sub>6</sub> ][SiF <sub>6</sub> ]                                                                                                                |
| 24909    | 2.167 Å | Baur, W. H.; Rao, B. R., <i>Naturwissenschaften</i> <b>1967</b> , <i>54</i> , 561. [Fe(H <sub>2</sub> O) <sub>6</sub> ][Al <sub>2</sub> (PO <sub>4</sub> ) <sub>2</sub> (OH) <sub>2</sub> ]·H <sub>2</sub> O                                                                  |
| GLYCFE03 | 2.169 Å | Gallo, G.; Bette, S.; Dinnebier, R. E. <i>Z. Anorg. Allg. Chem.</i> <b>2019</b> , <i>645</i> , 1350. [Fe(H <sub>2</sub> O) <sub>6</sub> ][Fe(H <sub>2</sub> O) <sub>4</sub> (C <sub>2</sub> H <sub>9</sub> NO <sub>4</sub> )](SO <sub>4</sub> ) <sub>2</sub>                  |
| GLYCFE   | 2.176 Å | Lindqvist, I.; Rosenstein, R., <i>Acta Chem. Scand.</i> <b>1960</b> , <i>14</i> , 1228. [Fe(H <sub>2</sub> O) <sub>6</sub> ][Fe(H <sub>2</sub> O) <sub>4</sub> (C <sub>2</sub> H <sub>9</sub> NO <sub>4</sub> )](SO <sub>4</sub> ) <sub>2</sub>                               |
| DIMPOE   | -----   | Hämäläinen, R.; Turpeinen, U.; Ahlgren, M., <i>Eur. Cryst. Meeting</i> <b>1985</b> , <i>9</i> , 204. [Fe(H <sub>2</sub> O) <sub>6</sub> ][FeC <sub>18</sub> H <sub>14</sub> N <sub>2</sub> O <sub>6</sub> ] <sub>2</sub> ·2H <sub>2</sub> O                                   |
| OGATOF   | -----   | Ahmad, R.; Hardie, M. J., <i>Cryst. Eng. Comm.</i> <b>2002</b> , <i>4</i> , 227. [Fe(H <sub>2</sub> O) <sub>6</sub> ][CoC <sub>4</sub> H <sub>22</sub> B <sub>18</sub> ] <sub>2</sub> ·4C <sub>27</sub> H <sub>30</sub> O <sub>6</sub> ·4CH <sub>3</sub> CN·4H <sub>2</sub> O |

**Mean 2.120 Å/92 structures**

Iron(III)

*Six-coordination, octahedral configuration*

| ICSD/CSD code | <i>d</i> (Fe-O) | Reference, compound formula                                                                                                                                                                                                                                     |
|---------------|-----------------|-----------------------------------------------------------------------------------------------------------------------------------------------------------------------------------------------------------------------------------------------------------------|
| EMEBEF        | 1.940 Å         | Sabirov, V. K. <i>Zh. Strukt. Khim.</i> <b>2015</b> , <i>56</i> , 747. NH <sub>4</sub> [Fe(H <sub>2</sub> O) <sub>6</sub> ](SO <sub>4</sub> ) <sub>2</sub> ·6·6H <sub>2</sub> O                                                                                 |
| DEDYUK        | 1.984 Å         | Zheng, J.; Ma, Y.; Yang, X.; Ma, P. <i>RSC Adv.</i> <b>2022</b> , <i>12</i> , 18736. [Fe(H <sub>2</sub> O) <sub>6</sub> ] <sub>2</sub> (ClO <sub>4</sub> ) <sub>6</sub> ·C <sub>54</sub> H <sub>60</sub> N <sub>24</sub> O <sub>12</sub>                        |
| 1002          | 1.986 Å         | Hair, N. J.; Beattie, J. K., <i>Inorg. Chem.</i> <b>1977</b> , <i>16</i> , 245. [Fe(H <sub>2</sub> O) <sub>6</sub> ](NO <sub>3</sub> ) <sub>3</sub> ·3H <sub>2</sub> O                                                                                          |
| 252899        | 1.988 Å         | Fischer, A. <i>Acta Crystallogr., Sect. E</i> <b>2006</b> , <i>62</i> , i9. [Fe(H <sub>2</sub> O) <sub>6</sub> ](ClO <sub>4</sub> ) <sub>3</sub> ·3H <sub>2</sub> O                                                                                             |
| 68910         | 1.989 Å         | Armstrong, R. S.; Beattie, K. B.; Best, S. P.; Braithwaite, G. P.; del Favero, P.; Skelton, B. W.; White, A. H., <i>Aust. J. Chem.</i> <b>1990</b> , <i>43</i> , 393. Cs[Fe(H <sub>2</sub> O) <sub>6</sub> ](SeO <sub>4</sub> ) <sub>2</sub> ·6H <sub>2</sub> O |
| 262788        | 1.990 Å         | Schmidt, H.; Asztalos, A.; Bik, F.; Voigt, W. <i>Acta Crystallogr., Sect. C</i> <b>2012</b> , <i>68</i> , i29. [Fe(H <sub>2</sub> O) <sub>6</sub> ](NO <sub>3</sub> ) <sub>3</sub>                                                                              |
| 420959        | 1.990 Å         | Nitschke, C.; Kockerling, M. <i>Inorg. Chem.</i> <b>2011</b> , <i>50</i> , 4313. [Fe(H <sub>2</sub> O) <sub>6</sub> ](B(CN) <sub>4</sub> ) <sub>3</sub>                                                                                                         |
| XIGSEL        | 1.991 Å         | [Fe(H <sub>2</sub> O) <sub>6</sub> ] <sub>2</sub> [Fe <sub>2</sub> H <sub>20</sub> O <sub>11</sub> ](NO <sub>3</sub> ) <sub>10</sub> ·4C <sub>10</sub> H <sub>20</sub> O <sub>5</sub> ·6H <sub>2</sub> O                                                        |
| 69132         | 1.991 Å         | Li, J.-J.; Zhou, J.-L.; Dong, W. <i>Chin. Sci. Bull.</i> <b>1990</b> , <i>35</i> , 2073. Na[Fe(H <sub>2</sub> O) <sub>6</sub> ](SO <sub>4</sub> ) <sub>2</sub>                                                                                                  |
| 81103         | 1.992 Å         | Giester, G.; Miletich, R. <i>Neues Jahrbuch Miner. Monatsh.</i> <b>1995</b> , 211. Cs[Fe(H <sub>2</sub> O) <sub>6</sub> ][Fe <sub>3</sub> (H <sub>2</sub> O) <sub>6</sub> (SeO <sub>4</sub> ) <sub>6</sub> ]·6H <sub>2</sub> O                                  |
| 69435         | 1.994 Å         | Best, S. P.; Bruce Forsyth, J. <i>J. Chem. Soc., Dalton Trans.</i> <b>1990</b> , 395. Cs[Fe(H <sub>2</sub> O) <sub>6</sub> ](SO <sub>4</sub> ) <sub>2</sub> ·6H <sub>2</sub> O                                                                                  |

|             |                              |                                                                                                                                                                                                                                                                                                                                                                                                                                                             |
|-------------|------------------------------|-------------------------------------------------------------------------------------------------------------------------------------------------------------------------------------------------------------------------------------------------------------------------------------------------------------------------------------------------------------------------------------------------------------------------------------------------------------|
| 201213      | 1.995 Å                      | Beattie, J. K.; Best, S. P.; Skelton, B. W.; White, A. H. <i>J. Chem. Soc., Dalton Trans.</i> <b>1981</b> , 2105.<br>Cs[Fe(H <sub>2</sub> O) <sub>6</sub> ](SO <sub>4</sub> ) <sub>2</sub> ·6H <sub>2</sub> O                                                                                                                                                                                                                                               |
| QOYGIX      | 1.995 Å                      | Berdiell, I. C.; Hochdorffer, T.; Desplanches, C.; Kulmaczewski, R.; Shahid, N.; Wolny, J. A.; Warriner, S. L.; Cespedes, O.; Schunemann, V.; Chastanet, G.; Halcrow, M. A. <i>J. Am. Chem. Soc.</i> <b>2019</b> , <i>141</i> , 18759. [Fe(H <sub>2</sub> O) <sub>6</sub> ][Fe <sub>8</sub> C <sub>144</sub> H <sub>132</sub> N <sub>72</sub> O <sub>12</sub> ](BF <sub>4</sub> ) <sub>7</sub> ·2.5CH <sub>3</sub> CN·2.5(CH <sub>3</sub> ) <sub>2</sub> CO |
| MEWZAP      | 1.996 Å                      | Dalrymple, S. A.; Parvez, M.; Shimizu, G. K. H. <i>Chem. Commun.</i> <b>2001</b> , 2672.<br>[Fe(H <sub>2</sub> O) <sub>6</sub> ](C <sub>9</sub> H <sub>9</sub> O <sub>9</sub> S <sub>3</sub> ) <sub>3</sub> ·3CH <sub>3</sub> OH                                                                                                                                                                                                                            |
| MEWZAP01    | 1.996 Å                      | Dalrymple, S. A.; Parvez, M.; Shimizu, G. K. H. <i>Inorg. Chem.</i> <b>2002</b> , 6986.<br>[Fe(H <sub>2</sub> O) <sub>6</sub> ](C <sub>9</sub> H <sub>9</sub> O <sub>9</sub> S <sub>3</sub> ) <sub>3</sub> ·3CH <sub>3</sub> OH                                                                                                                                                                                                                             |
| QOYHAQ      | 1.996 Å                      | Berdiell, I. C.; Hochdorffer, T.; Desplanches, C.; Kulmaczewski, R.; Shahid, N.; Wolny, J. A.; Warriner, S. L.; Cespedes, O.; Schunemann, V.; Chastanet, G.; Halcrow, M. A. <i>J. Am. Chem. Soc.</i> <b>2019</b> , <i>141</i> , 18759. [Fe(H <sub>2</sub> O) <sub>6</sub> ][Fe <sub>8</sub> C <sub>144</sub> H <sub>132</sub> N <sub>72</sub> O <sub>12</sub> ](BF <sub>4</sub> ) <sub>7</sub> ·1.8CH <sub>3</sub> CN·1.3(CH <sub>3</sub> ) <sub>2</sub> CO |
| 187488      | 1.997 Å                      | Skogareva, L. S.; Shilov, G. V.; Karelin, A. I. <i>J. Struct. Chem.</i> <b>2012</b> , <i>53</i> , 907. [Fe(H <sub>2</sub> O) <sub>6</sub> ](ClO <sub>4</sub> ) <sub>3</sub> ·3H <sub>2</sub> O                                                                                                                                                                                                                                                              |
| QOYHEU      | 1.998 Å                      | Berdiell, I. C.; Hochdorffer, T.; Desplanches, C.; Kulmaczewski, R.; Shahid, N.; Wolny, J. A.; Warriner, S. L.; Cespedes, O.; Schunemann, V.; Chastanet, G.; Halcrow, M. A. <i>J. Am. Chem. Soc.</i> <b>2019</b> , <i>141</i> , 18759. [Fe(H <sub>2</sub> O) <sub>6</sub> ][Fe <sub>8</sub> C <sub>144</sub> H <sub>132</sub> N <sub>72</sub> O <sub>12</sub> ](BF <sub>4</sub> ) <sub>7</sub> ·2.5CH <sub>3</sub> CN·1.5(CH <sub>3</sub> ) <sub>2</sub> CO |
| 69435       | 2.001 Å                      | Best, S. P.; Bruce Forsyth, J., <i>J. Chem. Soc., Dalton Trans.</i> <b>1990</b> , 395-400. Cs[Fe(H <sub>2</sub> O) <sub>6</sub> ](SO <sub>4</sub> ) <sub>2</sub> ·6H <sub>2</sub> O                                                                                                                                                                                                                                                                         |
| QOYFES02    | 2.005 Å                      | Berdiell, I. C.; Hochdorffer, T.; Desplanches, C.; Kulmaczewski, R.; Shahid, N.; Wolny, J. A.; Warriner, S. L.; Cespedes, O.; Schunemann, V.; Chastanet, G.; Halcrow, M. A. <i>J. Am. Chem. Soc.</i> <b>2019</b> , <i>141</i> , 18759. [Fe(H <sub>2</sub> O) <sub>6</sub> ][Fe <sub>8</sub> C <sub>120</sub> H <sub>84</sub> N <sub>72</sub> O <sub>12</sub> ](BF <sub>4</sub> ) <sub>7</sub> ·6CH <sub>3</sub> CN                                          |
| QOYFIW      | 2.006 Å                      | Berdiell, I. C.; Hochdorffer, T.; Desplanches, C.; Kulmaczewski, R.; Shahid, N.; Wolny, J. A.; Warriner, S. L.; Cespedes, O.; Schunemann, V.; Chastanet, G.; Halcrow, M. A. <i>J. Am. Chem. Soc.</i> <b>2019</b> , <i>141</i> , 18759. [Fe(H <sub>2</sub> O) <sub>6</sub> ][Fe <sub>8</sub> C <sub>120</sub> H <sub>84</sub> N <sub>72</sub> O <sub>12</sub> ](BF <sub>4</sub> ) <sub>7</sub> ·6CH <sub>3</sub> CN                                          |
| 237717      | 2.007 Å                      | Hennings, E.; Schmidt, H.; Voigt, W. <i>Acta Crystallogr., Sect. E</i> <b>2014</b> , <i>70</i> , 477. [Fe(H <sub>2</sub> O) <sub>6</sub> ](ClO <sub>4</sub> ) <sub>3</sub> ·3H <sub>2</sub> O                                                                                                                                                                                                                                                               |
| <b>Mean</b> | <b>1.995 Å/21 structures</b> |                                                                                                                                                                                                                                                                                                                                                                                                                                                             |

**Table S1as.** Summary of solid state structures containing hydrated ruthenium(II) and ruthenium(III) ions. The ICSD/CDS code refers to the code in the Inorganic Crystal Structure Database (ICSD, number) and Cambridge Structure Database (CSD, letters), respectively, and the mean Ru-O bond distance,  $d(\text{Ru-O})$ . Data in purple text are not included in the mean distance as they are uncertain or differ significantly from the mean value.

### Ruthenium(II)

*Six-coordination, octahedral configuration*

| ICSD/CSD code    | $d(\text{Ru-O})$            | Reference, compound formula                                                                                                                                                                                                                      |
|------------------|-----------------------------|--------------------------------------------------------------------------------------------------------------------------------------------------------------------------------------------------------------------------------------------------|
| BONPEZ           | 2.122 Å                     | Bernhard, P.; Burgi, H.-B.; Hauser, J.; Lehmann, H.; Ludi, A. <i>Inorg. Chem.</i> <b>1982</b> , <i>21</i> , 3936.<br>[RuH <sub>2</sub> O] <sub>6</sub> ]( <i>p</i> -CH <sub>3</sub> C <sub>6</sub> H <sub>4</sub> SO <sub>3</sub> ) <sub>2</sub> |
| 413219<br>OLUXAU | 2.090 Å                     | Taimisto, M.; Oilunkaniemi, R.; Laitinen, R. S.; Ahlgren, M. <i>Z. Naturforsch., Teil B</i> <b>2003</b> , <i>58</i> , 959.<br>[RuH <sub>2</sub> O] <sub>6</sub> ][RuCl <sub>3</sub> (CO) <sub>3</sub> ] <sub>2</sub> ·2H <sub>2</sub> O          |
| 67828            | 2.121 Å                     | Bürgi, H. B.; Raselli, A. <i>Struct. Chem.</i> <b>1993</b> , <i>4</i> , 23. K <sub>2</sub> [Ru(H <sub>2</sub> O) <sub>6</sub> ](SO <sub>4</sub> ) <sub>2</sub>                                                                                   |
| <b>Mean</b>      | <b>2.111 Å/3 structures</b> |                                                                                                                                                                                                                                                  |

### Ruthenium(III)

*Six-coordination, octahedral configuration*

| ICSD/CSD code | $d(\text{Ru-O})$            | Reference, compound formula                                                                                                                                                                                                                                                                                                               |
|---------------|-----------------------------|-------------------------------------------------------------------------------------------------------------------------------------------------------------------------------------------------------------------------------------------------------------------------------------------------------------------------------------------|
| BONPID        | 2.028 Å                     | Bernhard, P.; Burgi, H.-B.; Hauser, J.; Lehmann, H.; Ludi, A. <i>Inorg. Chem.</i> <b>1982</b> , <i>21</i> , 3936.<br>[RuH <sub>2</sub> O] <sub>6</sub> ]( <i>p</i> -CH <sub>3</sub> C <sub>6</sub> H <sub>4</sub> SO <sub>3</sub> ) <sub>3</sub>                                                                                          |
| 69437         | 2.014 Å                     | Best, S. P.; Bruce Forsyth, J. B. <i>J. Chem. Soc., Dalton Trans</i> <b>1990</b> , 3507. Cs[Ru(H <sub>2</sub> O) <sub>6</sub> ](SO <sub>4</sub> ) <sub>2</sub> ·6H <sub>2</sub> O                                                                                                                                                         |
| WISCAF        | 2.157 Å                     | Mon, M.; Adam, R.; Ferrando-Soria, J.; Corma, A.; Armentano, D.; Pardo, E.; Leyva-Perez, A. <i>ACS Catalysis</i> <b>2018</b> , <i>8</i> , 10401. [RuH <sub>2</sub> O] <sub>6</sub> ] <sub>4</sub> [Cu <sub>6</sub> Ni <sub>4</sub> C <sub>78</sub> H <sub>72</sub> N <sub>12</sub> O <sub>42</sub> ] <sub>3</sub> ·164.19H <sub>2</sub> O |
| <b>Mean</b>   | <b>2.021 Å/2 structures</b> |                                                                                                                                                                                                                                                                                                                                           |



**Table S1at.** Summary of solid state structures containing hydrated cobalt(II) and cobalt(III) ions. The ICSD/CDS code refers to the code in the Inorganic Crystal Structure Database (ICSD, number) and Cambridge Structure Database (CSD, letters), respectively, and the mean Co-O bond distance,  $d(\text{Co-O})$ ;  $d(\text{Co-O})_b$  denotes bridging ligands and  $d(\text{Co-O})_t$  terminal ligands.. Data in purple text are not included in the mean distance as they are uncertain or differ significantly from the mean value.

### Cobalt(II)

*Six-coordination, octahedral configuration*

| ICSD/CSD code | $d(\text{Co-O})$ | Reference, compound formula                                                                                                                                                                                                                                                                                                  |
|---------------|------------------|------------------------------------------------------------------------------------------------------------------------------------------------------------------------------------------------------------------------------------------------------------------------------------------------------------------------------|
| GOPJOM        | 2.019 Å          | Miao, H.; Wan, H.-X.; Liu, M.; Zhang, Y.; Xu, X.; Ju, W.-W.; Zhu, D.-R.; Xu, Y. <i>J. Mater. Chem. C</i> <b>2014</b> , 2, 6554. $[\text{Co}(\text{H}_2\text{O})_6][\text{Co}_{16}\text{Mo}_{16}\text{C}_{76}\text{H}_{106}\text{N}_{18}\text{O}_{122}\text{P}_{24}] \cdot 5\text{H}_2\text{O}$                               |
| IXEJOL        | 2.035 Å          | Yu, K.; Zhou, B.-B.; Yu, Y.; Su, Z.-H.; Yang, G.-Y. <i>Inorg. Chem.</i> <b>2011</b> , 50, 1862. $\text{Na}_2[\text{Co}(\text{H}_2\text{O})_6][\text{Co}_{16}\text{Mo}_{16}\text{C}_{50}\text{H}_{80}\text{N}_{10}\text{O}_{138}\text{P}_{24}] \cdot 4\text{H}_2\text{O}$                                                     |
| EGOCUZ        | 2.040 Å          | Cao, M.-L.; Hao, H.-G.; Zhang, W.-X.; Ye, B.-H. <i>Inorg. Chem.</i> <b>2008</b> , 47, 8126. $[\text{Co}(\text{H}_2\text{O})_6][\text{Co}_8\text{C}_{156}\text{H}_{96}\text{N}_{60}\text{O}_{12}](\text{HCO}_3)_6 \cdot 24\text{H}_2\text{O}$                                                                                 |
| 400491        | 2.042 Å          | Abrahams, I.; Clark, S. J.; Donaldson, J. D.; Khan, Z.; Grimes, S. M. <i>Z. Kristallogr.</i> <b>1994</b> , 209, 619. $[\text{Co}(\text{H}_2\text{O})_6][\text{SnF}_6]$                                                                                                                                                       |
| OJOPEI        | 2.042 Å          | Harrison, R. G.; Burrows, J. L.; Dalley, N. K. <i>Inorg. Chim. Acta</i> <b>2003</b> , 351, 399. $\text{Ba}_4[\text{Co}(\text{H}_2\text{O})_6][\text{Co}_{11}\text{C}_{224}\text{H}_{232}\text{N}_{16}\text{O}_{108}] \cdot 79\text{H}_2\text{O}$                                                                             |
| SIWHUD        | 2.044 Å          | Chatterjee, R.; Paul, L.; Hazra, D. K.; Pal, N.; Jana, A. D.; Mukherjee, M.; Ali, M. <i>Polyhedron</i> <b>2014</b> , 68, 265. $[\text{Co}(\text{H}_2\text{O})_6](\text{C}_5\text{H}_6\text{N})[\text{CoW}_{12}\text{O}_{40}]\text{NO}_3 \cdot 3\text{H}_2\text{O}$                                                           |
| BAVYOM01      | 2.045 Å          | Du, M.; Zhao, X.-J.; Guo, J.-H. <i>Acta Crystallogr., Sect. E</i> <b>2004</b> , 60, m788. $[\text{Co}(\text{H}_2\text{O})_6](4\text{-OOC-C}_5\text{H}_4\text{NH})_2$                                                                                                                                                         |
| XOKWEB        | 2.049 Å          | Zou, J.-Y.; Shi, W.; Zhang, J.-Y.; He, Y.-F.; Gao, H.-L.; Cui, J.-Z.; Cheng P. <i>CrystEngComm</i> <b>2014</b> , 16, 7133. $(\text{H}_3\text{O})_6((\text{CH}_3)_2\text{NH}_2)_9\text{Li}_3[\text{Co}(\text{H}_2\text{O})_6][\text{Co}_8\text{C}_{48}\text{N}_{36}\text{O}_{48}] \cdot 14\text{H}_2\text{O}$                 |
| BAVYOM02      | 2.052 Å          | Baruah J. B. CCDC deposition number 749998, <b>2016</b> . $[\text{Co}(\text{H}_2\text{O})_6](4\text{-OOC-C}_5\text{H}_4\text{NH})_2$                                                                                                                                                                                         |
| DURPIQ        | 2.054 Å          | Zhang, Y.-H.; Han, J.-M.; Li, Z.-Z. <i>Acta Crystallogr., Sect. E</i> <b>2010</b> , 66, m1007. $[\text{Co}(\text{H}_2\text{O})_6]\text{C}_{16}\text{H}_8\text{O}_8$                                                                                                                                                          |
| 112645        | 2.059 Å          | Ahmed, S. <i>J. Mol. Struct.</i> <b>2021</b> , 1227, 129334. $\text{K}_2[\text{Co}(\text{H}_2\text{O})_6](\text{HPO}_4)_2$                                                                                                                                                                                                   |
| FOWLIN        | 2.059 Å          | Jiang, J.; Lu, Y.; Yuan, L.; Liu, W. <i>Acta Crystallogr., Sect. E</i> <b>2009</b> , 65, m952. $[\text{Co}(\text{H}_2\text{O})_6][\text{NiC}_{12}\text{H}_{11}\text{N}_2\text{O}_5] \cdot 6\text{H}_2\text{O}$                                                                                                               |
| AZAREB        | 2.060 Å          | Das, J.; Shem-Tov, D.; Wang, S.; Zhang, L.; Flaxer, E.; Zhang, S.; Stierstorfer, J.; Wang, K.; Yan, Q.-L.; Dobrovetsky, R.; Gozin, M. <i>Chem. Eng. J.</i> <b>2021</b> , 426, 131806. $[\text{Co}(\text{H}_2\text{O})_6][\text{Co}_2\text{Na}_2\text{C}_{12}\text{H}_{24}\text{N}_{54}\text{O}_8] \cdot 4\text{H}_2\text{O}$ |
| POVSID        | 2.060 Å          | Cao, M.-L.; Mo, H.-J.; Ye, B.-H. <i>Cryst. Growth Des.</i> <b>2009</b> , 9, 546. $[\text{Co}(\text{H}_2\text{O})_6][\text{Co}_8\text{C}_{156}\text{H}_{108}\text{N}_{72}](\text{NO}_3)_6 \cdot 12\text{H}_2\text{O}$                                                                                                         |

|          |         |                                                                                                                                                                                                                                                                                                                                    |
|----------|---------|------------------------------------------------------------------------------------------------------------------------------------------------------------------------------------------------------------------------------------------------------------------------------------------------------------------------------------|
| VAHCIR   | 2.060 Å | Zhang; Z.-T.; Liu; Q.-G.; Liu; X.-H.; Yang; B.-L.; Duan; Y.-F.; Gao; Z.-W.; Yu, K.-B. <i>Huaxue Xuebao</i> <b>2002</b> , <i>60</i> , 1846. [Co(H <sub>2</sub> O) <sub>6</sub> ](C <sub>16</sub> H <sub>11</sub> O <sub>7</sub> S) <sub>2</sub> ·10H <sub>2</sub> O                                                                 |
| POVSUP   | 2.062 Å | Cao, M.-L.; Mo, H.-J.; Ye, B.-H. <i>Cryst. Growth Des.</i> <b>2009</b> , <i>9</i> , 546. [Co(H <sub>2</sub> O) <sub>6</sub> ][Co <sub>8</sub> C <sub>156</sub> H <sub>108</sub> N <sub>72</sub> ](3,5-(COOH) <sub>2</sub> -1-COO-C <sub>6</sub> H <sub>3</sub> ) <sub>6</sub> ·6C <sub>2</sub> H <sub>5</sub> OH·3H <sub>2</sub> O |
| XOLGEM   | 2.062 Å | Zou, J.-Y.; Shi, W.; Zhang, J.-Y.; He, Y.-F.; Gao, H.-L.; Cui, J.-Z.; Cheng, P. <i>CrystEngComm</i> <b>2014</b> , <i>16</i> , 7133. (H <sub>3</sub> O) <sub>15</sub> [Co(H <sub>2</sub> O) <sub>6</sub> ][Co <sub>8</sub> Li <sub>3</sub> C <sub>48</sub> N <sub>36</sub> O <sub>48</sub> ]·10H <sub>2</sub> O                     |
| POVSOJ   | 2.063 Å | Cao, M.-L.; Mo, H.-J.; Ye, B.-H. <i>Cryst. Growth Des.</i> <b>2009</b> , <i>9</i> , 546. [Co(H <sub>2</sub> O) <sub>6</sub> ][Co <sub>8</sub> C <sub>156</sub> H <sub>108</sub> N <sub>72</sub> ](HCO <sub>3</sub> ) <sub>6</sub> ·24H <sub>2</sub> O                                                                              |
| CONBOY   | 2.064 Å | Jia, T.-J.; Li, S.-M.; Cao, W.; Li, L.-C.; Zheng, X.-J.; Yuan, D.-Q. <i>J. Solid State Chem.</i> <b>2013</b> , <i>201</i> , 208. [Co(H <sub>2</sub> O) <sub>6</sub> ][CoCu <sub>2</sub> C <sub>16</sub> O <sub>20</sub> ]·4H <sub>2</sub> O                                                                                        |
| EBUGAM   | 2.064 Å | Zhang, X.; Lu, T.; Xu, X.; Wang, Y. <i>J. Coord. Chem.</i> <b>2017</b> , <i>70</i> , 60. [Co(H <sub>2</sub> O) <sub>6</sub> ][Co <sub>8</sub> C <sub>156</sub> H <sub>96</sub> N <sub>60</sub> O <sub>12</sub> ](NO <sub>3</sub> ) <sub>6</sub> ·12H <sub>2</sub> O                                                                |
| EGOCOT   | 2.064 Å | Cao, M.-L.; Hao, H.-G.; Zhang, W.-X.; Ye, B.-H. <i>Inorg. Chem.</i> <b>2008</b> , <i>47</i> , 8126. [Co(H <sub>2</sub> O) <sub>6</sub> ][Co(N <sub>2</sub> C <sub>12</sub> H <sub>12</sub> ) <sub>3</sub> ][CoW <sub>12</sub> C <sub>12</sub> H <sub>16</sub> N <sub>2</sub> O <sub>42</sub> ]                                     |
| FEPPUM   | 2.064 Å | Gao; H.-L.; Ding; B.; Yi; L.; Cheng; P.; Liao; D.-Z.; Yan; S.-P.; Jiang, Z.-H. <i>Inorg. Chem. Commun.</i> <b>2005</b> , <i>8</i> , 151. [Co(H <sub>2</sub> O) <sub>6</sub> ][Co <sub>2</sub> C <sub>16</sub> H <sub>12</sub> N <sub>2</sub> O <sub>16</sub> ]·2H <sub>2</sub> O                                                   |
| 260411   | 2.065 Å | Yotnoi, B.; Luachan, S.; Prior, T. H.; Rujiwatra, A. <i>Acta Crystallogr., Sect. E</i> <b>2009</b> , <i>65</i> , i52. [Co(H <sub>2</sub> O) <sub>6</sub> ] <sub>0.35</sub> [Co <sub>2</sub> (OH) <sub>3</sub> SO <sub>4</sub> ]                                                                                                    |
| YOYPIM   | 2.065 Å | Cao, M.-L.; Wu, J.-J.; Mo, H.-J.; Ye, B.-H. <i>J. Am. Chem Soc.</i> <b>2009</b> , <i>131</i> , 3458. [Co(H <sub>2</sub> O) <sub>6</sub> ][Co <sub>8</sub> C <sub>156</sub> H <sub>96</sub> N <sub>60</sub> O <sub>12</sub> ]Br <sub>6</sub> ·12C <sub>3</sub> H <sub>4</sub> N <sub>2</sub> ·56H <sub>2</sub> O                    |
| YOYPOS   | 2.065 Å | Cao, M.-L.; Wu, J.-J.; Mo, H.-J.; Ye, B.-H. <i>J. Am. Chem Soc.</i> <b>2009</b> , <i>131</i> , 3458. [Co(H <sub>2</sub> O) <sub>6</sub> ][Co <sub>8</sub> C <sub>156</sub> H <sub>96</sub> N <sub>60</sub> O <sub>12</sub> ]Br <sub>6</sub> ·12C <sub>3</sub> H <sub>4</sub> N <sub>2</sub> ·58H <sub>2</sub> O                    |
| FONQUV   | 2.066 Å | Zhang, X.-L.; Weng Ng, S. <i>Acta Crystallogr., Sect. E</i> <b>2005</b> , <i>61</i> , m1140. [Co(H <sub>2</sub> O) <sub>6</sub> ](C <sub>6</sub> H <sub>4</sub> NO <sub>3</sub> ) <sub>2</sub>                                                                                                                                     |
| GAXLEY   | 2.066 Å | Liu, M.-J.; Cao, D.-K.; Liu, B.; Li, Y.-Z.; Huang, J.; Zheng, L.-M. <i>CrystEngComm</i> <b>2012</b> , <i>14</i> , 4699. [Co(H <sub>2</sub> O) <sub>6</sub> ][Co <sub>2</sub> C <sub>10</sub> H <sub>14</sub> N <sub>2</sub> O <sub>12</sub> P <sub>2</sub> ]·2H <sub>2</sub> O                                                     |
| JEHKOW01 | 2.066 Å | Li; B.-L.; Song; L.-X.; Ding; J.-G.; Bian; G.-Q.; Yu; K.-B.; You, X.-Z. <i>Jiegou Huaxue</i> <b>1998</b> , <i>17</i> , 209. [Co(H <sub>2</sub> O) <sub>6</sub> ]Cl <sub>2</sub> ·2C <sub>6</sub> H <sub>12</sub> N <sub>4</sub> ·4H <sub>2</sub> O                                                                                 |
| OYOTAY   | 2.066 Å | Duan, X.; Meng, Q.; Su, Y.; Li, Y.; Duan, C.; Ren, X.; Lu, C. <i>Chem. Eur. J.</i> <b>2011</b> , <i>17</i> , 9936. [Co(H <sub>2</sub> O) <sub>6</sub> ] <sub>2</sub> [CoC <sub>12</sub> H <sub>20</sub> N <sub>2</sub> O <sub>4</sub> ][CoC <sub>34</sub> H <sub>16</sub> O <sub>16</sub> ]·7H <sub>2</sub> O                      |
| SUJQET   | 2.066 Å | Kepert, C. J.; Heseck, D.; Beer, P. D.; Rosseinsky, M. J. <i>Angew. Chem., Int. Ed.</i> <b>1998</b> , <i>37</i> , 3158. [Co(H <sub>2</sub> O) <sub>6</sub> ](C <sub>10</sub> H <sub>2</sub> O <sub>8</sub> S <sub>4</sub> )                                                                                                        |
| UDEDEM   | 2.067 Å | Masaoka, S.; Furukawa, S.; Chang, H.-C.; Mizutani, T.; Kitagawa, S. <i>Angew. Chem., Int. Ed.</i> <b>2001</b> , <i>40</i> , 3817. [Co(H <sub>2</sub> O) <sub>6</sub> ] <sub>10</sub> [CoC <sub>108</sub> H <sub>12</sub> N <sub>36</sub> O <sub>78</sub> ]·74H <sub>2</sub> O                                                      |

|          |         |                                                                                                                                                                                                                                                                                                                                                                                                  |
|----------|---------|--------------------------------------------------------------------------------------------------------------------------------------------------------------------------------------------------------------------------------------------------------------------------------------------------------------------------------------------------------------------------------------------------|
| VIWPEX   | 2.067 Å | Leong, W. L.; Vittal, J. J. <i>Cryst. Growth Des.</i> <b>2007</b> , <i>7</i> , 2112. [Co(H <sub>2</sub> O) <sub>6</sub> ][Co <sub>2</sub> C <sub>30</sub> H <sub>28</sub> N <sub>2</sub> O <sub>16</sub> ] $\cdot$ 2CH <sub>3</sub> CN                                                                                                                                                           |
| WELQOW   | 2.068 Å | Liao, J.-Z.; Wang, S.-S.; Wu, X.-Y.; Yu, R.; Lu, C.-Z.; Chen, X.-L. <i>Dalton Trans.</i> <b>2018</b> , <i>47</i> , 1027. [Co(H <sub>2</sub> O) <sub>6</sub> ](C <sub>18</sub> H <sub>12</sub> N <sub>2</sub> O <sub>10</sub> S)                                                                                                                                                                  |
| SETQOX   | 2.069 Å | Wolodkiewicz, W.; Brzyska, W.; Glowiak, T. <i>Pol. J. Chem.</i> <b>1996</b> , <i>70</i> , 409. [Co(H <sub>2</sub> O) <sub>6</sub> ](C <sub>7</sub> H <sub>3</sub> Cl <sub>2</sub> O <sub>2</sub> ) <sub>2</sub> $\cdot$ [CoC <sub>14</sub> H <sub>14</sub> Cl <sub>4</sub> O <sub>8</sub> ] $\cdot$ 3H <sub>2</sub> O                                                                            |
| VONNES   | 2.069 Å | Limei, Z.; Jiannan, Z.; Yunqian, Z.; Qianjiang, Z.; Saifeng, X.; Zhu, T.; Jianxin, Z.; Xin, Z.; Zhanbin, W.; Lasheng, L.; Day, A. I. <i>Supramol. Chem.</i> <b>2008</b> , <i>20</i> , 709. [Co(H <sub>2</sub> O) <sub>6</sub> ] <sub>2</sub> Cl <sub>2</sub> (NO <sub>3</sub> ) <sub>2</sub> $\cdot$ 3C <sub>44</sub> H <sub>48</sub> N <sub>24</sub> O <sub>12</sub> $\cdot$ 37H <sub>2</sub> O |
| VUNFIV   | 2.069 Å | Ding, R.; Wei, T.; Wang, Q.-Y.; Wang, T.; Zhang, Z.-T. <i>Z. Anorg. Allg. Chem.</i> <b>2015</b> , <i>641</i> , 1130. [Co(H <sub>2</sub> O) <sub>6</sub> ](C <sub>16</sub> H <sub>11</sub> O <sub>7</sub> S) <sub>2</sub> $\cdot$ 2H <sub>2</sub> O                                                                                                                                               |
| LIYYAT   | 2.070 Å | Cabaleiro-Martinez, S.; Castro, J.; Romero, J.; Garcia-Vazquez, J. A.; Sousa, A. <i>Acta Crystallogr., Sect. E</i> <b>2006</b> , <i>62</i> , e249. [Co(H <sub>2</sub> O) <sub>6</sub> ]( <i>p</i> -CH <sub>3</sub> C <sub>6</sub> H <sub>4</sub> SO <sub>3</sub> ) <sub>2</sub>                                                                                                                  |
| EGUNIF   | 2.071 Å | Tang, S.-F.; Li, L.-J.; Lv, X.-X.; Wang, C.; Zhao, X.-B. <i>CrystEngComm</i> <b>2014</b> , <i>16</i> , 7043. [Co(H <sub>2</sub> O) <sub>6</sub> ](C <sub>8</sub> H <sub>11</sub> O <sub>6</sub> P <sub>2</sub> ) <sub>2</sub> $\cdot$ 2H <sub>2</sub> O                                                                                                                                          |
| EKOYEK01 | 2.071 Å | Siva, V. ; Asath Bahadur, A. ; Shameem, A. ; Athimoolam, S.; Udaya Lakshmi, K.; Vinitha, G. <i>J. Mol. Struct.</i> <b>2019</b> , <i>1191</i> , 110. [Co(H <sub>2</sub> O) <sub>6</sub> ] <sub>3</sub> (2-C <sub>5</sub> H <sub>4</sub> NNH <sub>2</sub> ) <sub>2</sub> (SO <sub>4</sub> ) <sub>4</sub> $\cdot$ 2H <sub>2</sub> O                                                                 |
| WIKYEX   | 2.071 Å | Yan, M.; Chen, S.; Zhang, S.-L.; Ru, J. ; Zhang, R.-F. <i>Inorg. Chim. Acta</i> <b>2019</b> , <i>484</i> , 8. [Co(H <sub>2</sub> O) <sub>6</sub> ][CoC <sub>18</sub> H <sub>9</sub> F <sub>6</sub> O <sub>6</sub> Se <sub>3</sub> ]                                                                                                                                                              |
| IHEQAP   | 2.071 Å | Lin, H.-B. ; Wang, Q.-H.; Zhou, Z.-H. <i>J. Inorg. Organomet. Polym. Mater.</i> <b>2014</b> , <i>24</i> , 819. [Co(H <sub>2</sub> O) <sub>6</sub> ][CuC <sub>12</sub> H <sub>12</sub> N <sub>2</sub> O <sub>12</sub> ] $\cdot$ 2H <sub>2</sub> O                                                                                                                                                 |
| JIRREI   | 2.071 Å | Genther, D. J. ; Squattrito, P. J; Kirschbaum, K. ; Yearley, E. J. ; Pinkerton, A. A. <i>Acta Crystallogr., Sect. C</i> <b>2006</b> , <i>63</i> , m604. [Co(H <sub>2</sub> O) <sub>6</sub> ](C <sub>10</sub> H <sub>8</sub> NO <sub>3</sub> S) <sub>2</sub> $\cdot$ 2H <sub>2</sub> O                                                                                                            |
| SIJJOL   | 2.071 Å | Fabelo, O. ; Pasan, J. ; Lloret, F. ; Julve, M.; Ruiz-Perez, C. <i>Cryst. Growth Des.</i> <b>2007</b> , <i>9</i> , 815. [Co(H <sub>2</sub> O) <sub>6</sub> ](C <sub>10</sub> H <sub>4</sub> O <sub>8</sub> ) $\cdot$ C <sub>10</sub> H <sub>8</sub> N <sub>2</sub> O <sub>2</sub> $\cdot$ 4H <sub>2</sub> O                                                                                      |
| XIYMEY   | 2.071 Å | Tai, X.-S. ; Feng, Y.-M. ; Kong, F.-Y. <i>Acta Crystallogr., Sect. C</i> <b>2008</b> , <i>64</i> , m645. [Co(H <sub>2</sub> O) <sub>6</sub> ](C <sub>13</sub> H <sub>10</sub> NO <sub>4</sub> S) <sub>2</sub>                                                                                                                                                                                    |
| BAVYOM   | 2.072 Å | Knuutila, P. <i>Inorg. Chim. Acta</i> <b>1981</b> , <i>52</i> , 141. [Co(H <sub>2</sub> O) <sub>6</sub> ](4-OOC-C <sub>5</sub> H <sub>4</sub> NH) <sub>2</sub>                                                                                                                                                                                                                                   |
| BIFWAP   | 2.072 Å | Xue; L. ; DesMarteau, D. D.; Pennington, W. T CCDC deposition number, 247563, <b>2004</b> . [Co(H <sub>2</sub> O) <sub>6</sub> ](N(SO <sub>2</sub> CF <sub>3</sub> ) <sub>2</sub> ) <sub>2</sub> $\cdot$ 2H <sub>2</sub> O                                                                                                                                                                       |
| OCDCO    | 2.072 Å | Vance Jr., T. B.; Holt, E. M.; Pierpont, C. G.; Holt, S. L. <i>Acta Crystallogr., Sect. B</i> <b>1980</b> , <i>36</i> , 150. [Co(H <sub>2</sub> O) <sub>6</sub> ][CoCl <sub>4</sub> ] $\cdot$ C <sub>12</sub> H <sub>24</sub> O <sub>6</sub> $\cdot$ ((CH <sub>3</sub> ) <sub>2</sub> CO                                                                                                         |
| SUVBUG   | 2.072 Å | Leonard, M. A.; Squattrito, P. J.; Dubey, S. N. <i>Acta Crystallogr., Sect. C</i> <b>1999</b> , <i>55</i> , 35. [Co(H <sub>2</sub> O) <sub>6</sub> ](1-SO <sub>3</sub> -4-CHCH <sub>2</sub> -C <sub>6</sub> H <sub>4</sub> ) <sub>2</sub> $\cdot$ 2H <sub>2</sub> O                                                                                                                              |

|          |         |                                                                                                                                                                                                                                                                                                                                                                                                                            |
|----------|---------|----------------------------------------------------------------------------------------------------------------------------------------------------------------------------------------------------------------------------------------------------------------------------------------------------------------------------------------------------------------------------------------------------------------------------|
| XOBKOO   | 2.072 Å | Hu, M.-L.; Fang, L.-P.; Cheng, Y.-Q.; Jin, Z.-M. <i>Z. Kristallogr. - New Cryst. Struct.</i> <b>2002</b> , <i>217</i> , 121. [Co(H <sub>2</sub> O) <sub>6</sub> ]Br <sub>2</sub> ·2C <sub>6</sub> H <sub>12</sub> N <sub>4</sub> ·4H <sub>2</sub> O                                                                                                                                                                        |
| 39425    | 2.073 Å | Gulya, A. P.; Shova, S. G.; Mazus, M. D.; Rakov, I. E.; Kokunov, Y. V.; Buslaev, Y. A. <i>Koord. Khim.</i> <b>1991</b> , <i>17</i> , 492. [Co(H <sub>2</sub> O) <sub>6</sub> ][Sn <sub>6</sub> F <sub>3</sub> ] <sub>2</sub>                                                                                                                                                                                               |
| BIPBUY   | 2.073 Å | Xin-Hua Li; Qian Miao; Hong-Ping Xiao; Mao-Lin Hu <i>Acta Crystallogr., Sect. E</i> <b>2004</b> , <i>60</i> , m1784. [Co(H <sub>2</sub> O) <sub>6</sub> ](C <sub>10</sub> H <sub>10</sub> N <sub>2</sub> )(SO <sub>4</sub> ) <sub>2</sub>                                                                                                                                                                                  |
| DUQFUS   | 2.073 Å | Das, D.; Bhattacharjee, M. <i>Polyhedron</i> <b>2015</b> , <i>99</i> , 122. [Co(H <sub>2</sub> O) <sub>6</sub> ][MoC <sub>28</sub> H <sub>38</sub> N <sub>2</sub> O <sub>13</sub> ]·2(CH <sub>3</sub> ) <sub>2</sub> NCHO·H <sub>2</sub> O                                                                                                                                                                                 |
| LIYYAT02 | 2.073 Å | Baruah, J. B. CCDC deposition number 809377, <b>2016</b> . [Co(H <sub>2</sub> O) <sub>6</sub> ]( <i>p</i> -CH <sub>3</sub> C <sub>6</sub> H <sub>4</sub> SO <sub>3</sub> ) <sub>2</sub>                                                                                                                                                                                                                                    |
| NERGEY   | 2.073 Å | Dordevic, M.; Jeremic, D.; Andelkovic, K.; Gruden-Pavlovic, M.; Divjakovic, V.; Ristic, M. S.; Brceski, I. <i>J. Serb. Chem. Soc.</i> <b>2012</b> , <i>77</i> , 1391. [Co(H <sub>2</sub> O) <sub>6</sub> ](C <sub>10</sub> H <sub>15</sub> O <sub>3</sub> S) <sub>2</sub>                                                                                                                                                  |
| NUTMEU   | 2.073 Å | Schwarz, T.; Petri, A.; Schilling, J.; Lentz, A. <i>Acta Crystallogr., Sect. C</i> <b>1998</b> , <i>54</i> , 1104. [Co(H <sub>2</sub> O) <sub>6</sub> ](C <sub>5</sub> H <sub>5</sub> O <sub>4</sub> ) <sub>2</sub>                                                                                                                                                                                                        |
| PUQWII   | 2.073 Å | Jeremic, D. A.; Kaluderovic, G. N.; Gomez-Ruiz, S.; Brceski, I.; Kasalica, B.; Leovac, V. M. <i>Cryst. Growth Des.</i> <b>2010</b> , <i>10</i> , 559. [Co(H <sub>2</sub> O) <sub>6</sub> ](C <sub>10</sub> H <sub>15</sub> O <sub>4</sub> S) <sub>2</sub>                                                                                                                                                                  |
| WABLIU10 | 2.073 Å | Kosnic, E. J.; McClymont, E. L.; Hodder, R. A.; Squattrito, P. J. <i>Inorg. Chim. Acta</i> <b>1996</b> , <i>253</i> , 253. [Co(H <sub>2</sub> O) <sub>6</sub> ][C <sub>6</sub> H <sub>5</sub> SO <sub>3</sub> ] <sub>2</sub>                                                                                                                                                                                               |
| 22899    | 2.074 Å | Qu, X.-J.; Guo, H.-L.; Wang, Y.-K.; Yang, H.-X.; Bai, Y.; Dang, D.-B. <i>Inorg. Chem. Commun.</i> <b>2020</b> , <i>119</i> , 108083. [Co(H <sub>2</sub> O) <sub>6</sub> ][(Co(H <sub>2</sub> O) <sub>5</sub> ) <sub>2</sub> Co <sub>2</sub> ((Mo <sub>16</sub> O <sub>32</sub> )Co <sub>16</sub> (HPO <sub>4</sub> ) <sub>14</sub> (PO <sub>4</sub> ) <sub>10</sub> (H <sub>2</sub> O) <sub>15</sub> )]·38H <sub>2</sub> O |
| 73349    | 2.074 Å | Martin-Frere, J.; Jeannin, Y. P.; Robert, F.; Vaissermann, J. <i>Inorg. Chem.</i> <b>1991</b> , <i>30</i> , 3635. K <sub>2</sub> [Co(H <sub>2</sub> O) <sub>6</sub> ][As <sub>6</sub> CoMo <sub>6</sub> O <sub>30</sub> ]                                                                                                                                                                                                  |
| 159012   | 2.074 Å | Ganesh, V.; Seshasayee, M.; Aravamudan, G.; Heijdenrijk, D.; Schenk, H. <i>Acta Crystallogr., Sect. C</i> <b>1990</b> , <i>46</i> , 949. [Co(H <sub>2</sub> O) <sub>6</sub> ]Cl <sub>2</sub> (C <sub>6</sub> H <sub>12</sub> N <sub>4</sub> ) <sub>2</sub> ·4H <sub>2</sub> O                                                                                                                                              |
| AXOCOH   | 2.074 Å | Oelkers, B.; Schaffner, D.; Sun, Y. <i>Chem. Sel.</i> <b>2016</b> , <i>1</i> , 4440. [Co(H <sub>2</sub> O) <sub>6</sub> ][Co(H <sub>2</sub> O) <sub>4</sub> (CH(SO <sub>3</sub> ) <sub>3</sub> ) <sub>2</sub> ]                                                                                                                                                                                                            |
| EFATOX   | 2.074 Å | AlDamen, M. A.; Juwhari, H. K.; Al-zuheiri, A. M.; Alnazer, L. A. <i>Kristallografiya</i> <b>2017</b> , <i>62</i> , 1160. [Co(H <sub>2</sub> O) <sub>6</sub> ][Li(UO <sub>2</sub> (OOCCH <sub>3</sub> ) <sub>3</sub> ) <sub>3</sub> ]                                                                                                                                                                                      |
| ENIYOQ   | 2.074 Å | Stavila, V.; Bulimestru, I.; Gulea, A.; Colson, A. C.; Whitmire, K. H. <i>Acta Crystallogr., Sect. C</i> <b>2011</b> , <i>67</i> , m65. [Co(H <sub>2</sub> O) <sub>6</sub> ][BiC <sub>28</sub> H <sub>12</sub> N <sub>4</sub> O <sub>16</sub> ]·2H <sub>2</sub> O                                                                                                                                                          |
| JEHKOW   | 2.074 Å | Ganesh, V.; Seshasayee, M.; Aravamudan, G.; Heijdenrijk, D.; Schenk, H. <i>Acta Crystallogr., Sect. C</i> <b>1990</b> , <i>46</i> , 949. [Co(H <sub>2</sub> O) <sub>6</sub> ]Cl <sub>2</sub> ·2C <sub>6</sub> H <sub>12</sub> N <sub>4</sub> ·4H <sub>2</sub> O                                                                                                                                                            |
| LIYYAT01 | 2.074 Å | Fewings, K. R.; Junk, P. C.; Georganopoulou, D.; Prince, P. D.; Steed, J. W. <i>Polyhedron</i> <b>2001</b> , <i>20</i> , 643. [Co(H <sub>2</sub> O) <sub>6</sub> ]( <i>p</i> -CH <sub>3</sub> C <sub>6</sub> H <sub>4</sub> SO <sub>3</sub> ) <sub>2</sub>                                                                                                                                                                 |
| OYUCER   | 2.074 Å | Lin, H.; Mu, B.; Wang, X. <i>J. Coord. Chem.</i> <b>2011</b> , <i>64</i> , 3465. [Co(H <sub>2</sub> O) <sub>6</sub> ][CoC <sub>42</sub> H <sub>34</sub> N <sub>8</sub> O <sub>20</sub> ]·10H <sub>2</sub> O                                                                                                                                                                                                                |

|          |         |                                                                                                                                                                                                                                                                                                                                                                                                                                                                                                                                                                                               |
|----------|---------|-----------------------------------------------------------------------------------------------------------------------------------------------------------------------------------------------------------------------------------------------------------------------------------------------------------------------------------------------------------------------------------------------------------------------------------------------------------------------------------------------------------------------------------------------------------------------------------------------|
| 130264   | 2.075 Å | Felder, J. B.; Smith, M.; Zur Loye, H.-C. <i>Cryst. Growth Des.</i> <b>2018</b> , <i>18</i> , 1236. [Co(H <sub>2</sub> O) <sub>6</sub> ][U <sub>2</sub> O <sub>4</sub> F <sub>7</sub> ]                                                                                                                                                                                                                                                                                                                                                                                                       |
| 280891   | 2.075 Å | Kuratieva, N. V.; Naumova, M. I.; Naumov, D. Yu. <i>Acta Crystallogr., Sect. C</i> <b>2002</b> , <i>58</i> , i129. [Co(H <sub>2</sub> O) <sub>6</sub> ](H <sub>2</sub> PO <sub>2</sub> ) <sub>2</sub>                                                                                                                                                                                                                                                                                                                                                                                         |
| AJIDON   | 2.075 Å | Zhang, W.; Chen, Y.-T. <i>Acta Crystallogr., Sect. E</i> <b>2009</b> , <i>65</i> , m1548. [Co(H <sub>2</sub> O) <sub>6</sub> ](C <sub>7</sub> H <sub>8</sub> NO <sub>3</sub> S) <sub>2</sub>                                                                                                                                                                                                                                                                                                                                                                                                  |
| AQURAG   | 2.075 Å | Huang, L.-F.; Ji, C.-C.; Lu, Z.-Z.; Yao, X.-Q.; Hu, J.-S.; Zheng, H.-G. <i>Dalton Trans.</i> <b>2011</b> , <i>40</i> , 3183. [Co(H <sub>2</sub> O) <sub>6</sub> ][Co <sub>3</sub> C <sub>18</sub> H <sub>16</sub> O <sub>18</sub> ]·3H <sub>2</sub> O                                                                                                                                                                                                                                                                                                                                         |
| CAGLAZ   | 2.075 Å | Wu, G.-P.; Wei, S.-H.; Ren, W.-M.; Lu, X.-B.; Xu, T.-Q.; Darensbourg, D. J. <i>J. Am. Chem. Soc.</i> <b>2011</b> , <i>133</i> , 15191. [Co(H <sub>2</sub> O) <sub>6</sub> ](C <sub>12</sub> H <sub>20</sub> N <sub>3</sub> O <sub>3</sub> ) <sub>2</sub> Cl <sub>4</sub> ·2CH <sub>2</sub> Cl <sub>2</sub>                                                                                                                                                                                                                                                                                    |
| CAGVOV   | 2.075 Å | Ward, D. L.; Luehrs, D. C. <i>Acta Crystallogr., Sect. C</i> <b>1983</b> , <i>39</i> , 1370. [Co(H <sub>2</sub> O) <sub>6</sub> ](C <sub>10</sub> H <sub>4</sub> O <sub>8</sub> )                                                                                                                                                                                                                                                                                                                                                                                                             |
| CAGVOV04 | 2.075 Å | Bo, O. B.; Zhao, S. Y.; Zhang, Z. W.; Sheng, Y. L.; Sun, Z. X.; Sun, G. X.; Chen, C. L.; Li, Y.-X. <i>Koord. Khim</i> <b>2007</b> , <i>33</i> , 483. [Co(H <sub>2</sub> O) <sub>6</sub> ](C <sub>10</sub> H <sub>4</sub> O <sub>8</sub> )                                                                                                                                                                                                                                                                                                                                                     |
| LICPIX   | 2.075 Å | Yan-Cheng Liu; Tao Yuan; Zhen-Feng Chen; Hong Liang; Yong Zhang <i>Acta Crystallogr., Sect. E</i> <b>2007</b> , <i>63</i> , m1397. [Co(H <sub>2</sub> O) <sub>6</sub> ][CoC <sub>38</sub> H <sub>30</sub> N <sub>2</sub> O <sub>12</sub> S <sub>2</sub> ]·4H <sub>2</sub> O                                                                                                                                                                                                                                                                                                                   |
| PAVXIU   | 2.075 Å | Zun-Ting Zhang; Qiu-Ya Wang <i>Struct. Chem.</i> <b>2005</b> , <i>16</i> , 415. [Co(H <sub>2</sub> O) <sub>6</sub> ](C <sub>19</sub> H <sub>17</sub> O <sub>7</sub> S) <sub>2</sub> ·8H <sub>2</sub> O                                                                                                                                                                                                                                                                                                                                                                                        |
| POCGUL   | 2.075 Å | Yun, Y.-W.; Yang, P.; Han, W.-H. <i>Z. Kristallogr. – New Cryst Struct.</i> <b>2009</b> , <i>224</i> , 639. [Co(H <sub>2</sub> O) <sub>6</sub> ](C <sub>4</sub> H <sub>12</sub> N <sub>2</sub> )[GaF <sub>6</sub> ]Cl                                                                                                                                                                                                                                                                                                                                                                         |
| SUJQET01 | 2.075 Å | Kepert, C. J.; Heseck, D.; Beer, P. D.; Rosseinsky, M. J. <i>Angew. Chem., Int. Ed.</i> <b>1998</b> , <i>37</i> , 3158. [Co(H <sub>2</sub> O) <sub>6</sub> ](C <sub>10</sub> H <sub>2</sub> O <sub>8</sub> S <sub>4</sub> )·2H <sub>2</sub> O                                                                                                                                                                                                                                                                                                                                                 |
| WABLIU   | 2.075 Å | Kosnic, E. J.; McClymont, E. L.; Hodder, R. A.; Squattrito, P. J. <i>Inorg. Chim. Acta</i> <b>1992</b> , <i>201</i> , 143. [Co(H <sub>2</sub> O) <sub>6</sub> ][C <sub>6</sub> H <sub>5</sub> SO <sub>3</sub> ] <sub>2</sub>                                                                                                                                                                                                                                                                                                                                                                  |
| 63451    | 2.076 Å | Hoskins, B. F.; Linden, A. <i>Aust. J. Chem.</i> <b>1987</b> , <i>40</i> , 565. [Co(H <sub>2</sub> O) <sub>6</sub> ][GeF <sub>6</sub> ]                                                                                                                                                                                                                                                                                                                                                                                                                                                       |
| ATEQOH   | 2.076 Å | Feng, C.; Zhang, D.; Zhou, S.-Y.; Chen, J.-M.; Zuo, Z.-H.; Zhao, H. <i>Chin. J. Inorg. Chem.</i> <b>2016</b> , <i>32</i> , 1215. [Co(H <sub>2</sub> O) <sub>6</sub> ][CoC <sub>30</sub> H <sub>24</sub> N <sub>9</sub> O <sub>6</sub> ] <sub>2</sub> ·4H <sub>2</sub> O                                                                                                                                                                                                                                                                                                                       |
| EBOPIW   | 2.076 Å | Park, I.-H.; Lee, S. S. <i>CrystEngComm</i> <b>2011</b> , <i>13</i> , 6520. [Co(H <sub>2</sub> O) <sub>6</sub> ](ClO <sub>4</sub> ) <sub>2</sub> ·[Cu <sub>2</sub> I <sub>2</sub> (C <sub>12</sub> H <sub>24</sub> I <sub>2</sub> O <sub>4</sub> S <sub>2</sub> ) <sub>2</sub> ]·H <sub>2</sub> O                                                                                                                                                                                                                                                                                             |
| IJUPOU   | 2.076 Å | Dotsenko, V. V.; Netroba, E. E. <i>Zh. Strukt. Khim.</i> <b>2015</b> , <i>56</i> , 319. [Co(H <sub>2</sub> O) <sub>6</sub> ][Co <sub>2</sub> C <sub>11</sub> H <sub>26</sub> N <sub>4</sub> O <sub>5</sub> ] <sub>2</sub> (NO <sub>3</sub> ) <sub>6</sub>                                                                                                                                                                                                                                                                                                                                     |
| LERSEI   | 2.076 Å | Shi, H. F.; Wu, T.; Jiang, P. G.; Hao, Z.; Zhang, M. M. <i>Acta Crystallogr., Sect. E</i> <b>2013</b> , <i>69</i> , m103. [Co(H <sub>2</sub> O) <sub>6</sub> ]C <sub>14</sub> H <sub>10</sub> O <sub>6</sub> ·2H <sub>2</sub> O                                                                                                                                                                                                                                                                                                                                                               |
| UYIQOL   | 2.076 Å | de Campos, N. R.; Simosono, C. A.; Rosa, I. M. L.; da Silva, R. M. R.; Doriguetto, A. C.; do Pim, W. D.; Simoes, T. R. G.; Valdo, A. K. S. M.; Martins, F. T.; Sarmiento, C. V.; Nunes, W. C.; Guedes, G. P.; Pedroso, E. F.; Pereira, C. L. M.; Stumpf, H. O.; Lloret, F.; Julve, M.; Marinho, M. V. <i>Dalton Trans.</i> <b>2021</b> , <i>50</i> , 10707. [Co(H <sub>2</sub> O) <sub>6</sub> ] <sub>2</sub> [Co <sub>2</sub> C <sub>30</sub> H <sub>18</sub> N <sub>6</sub> O <sub>18</sub> ] <sub>2</sub> ·C <sub>10</sub> H <sub>8</sub> N <sub>2</sub> S <sub>2</sub> ·6H <sub>2</sub> O |
| YEJQIR   | 2.076 Å | Li, C.; Jiang, H.-Y.; Wang, J.-L.; Kang, R.-K.; Mei, H.; Xu, Y. <i>Dalton Trans.</i> <b>2022</b> , <i>51</i> , 9616. (C <sub>11</sub> H <sub>10</sub> N) <sub>2</sub> [Co(H <sub>2</sub> O) <sub>6</sub> ][Co <sub>16</sub> Mo <sub>16</sub> H <sub>61</sub> O <sub>148</sub> P <sub>24</sub> ](H <sub>2</sub> PO <sub>4</sub> )·25H <sub>2</sub> O                                                                                                                                                                                                                                           |

|        |         |                                                                                                                                                                                                                                                                                                                                   |
|--------|---------|-----------------------------------------------------------------------------------------------------------------------------------------------------------------------------------------------------------------------------------------------------------------------------------------------------------------------------------|
| 75984  | 2.077 Å | Mikenda, W.; Pertlik, F.; Steinboeck, S. <i>Monatsh. Chem.</i> <b>1995</b> , <i>126</i> , 61. [Co(H <sub>2</sub> O) <sub>6</sub> ][SnF <sub>6</sub> ]                                                                                                                                                                             |
| AYAZUW | 2.077 Å | Koval'chukova, O. V.; Strashnova, S. B.; Ilyukhin, A. B.; Sergienko, V. S.; Zaitsev, B. E.; Volyansky, O. V.; Korolev, O. V.; Dutova, T. Y. <i>Koord. Khim.</i> <b>2010</b> , <i>36</i> , 760. [Co(H <sub>2</sub> O) <sub>6</sub> ](NO <sub>3</sub> ) <sub>2</sub> ·C <sub>10</sub> H <sub>13</sub> N <sub>5</sub> O <sub>2</sub> |
| EHICAA | 2.077 Å | Bera, M.; Musie, G. T.; Powell, D. R. <i>Inorg. Chem. Commun.</i> <b>2010</b> , <i>13</i> , 1029. [Co(H <sub>2</sub> O) <sub>6</sub> ][Co <sub>4</sub> C <sub>46</sub> H <sub>50</sub> N <sub>4</sub> O <sub>22</sub> ]·2CH <sub>3</sub> CN(NO <sub>3</sub> ) <sub>2</sub> ·8H <sub>2</sub> O                                     |
| GIJXII | 2.077 Å | Martsinko, E. E.; Minacheva, L. K.; Seifullina, I. I.; Chebanenko, E. A.; Sergienko, V. S.; Churakov, A. V. <i>Zh. Neorg. Khim.</i> <b>2013</b> , <i>58</i> , 187. [Co(H <sub>2</sub> O) <sub>6</sub> ][Co <sub>2</sub> Ge <sub>4</sub> C <sub>10</sub> H <sub>14</sub> O <sub>18</sub> ]·4H <sub>2</sub> O                       |
| GUBTAZ | 2.077 Å | Chen, Z.; Li, Y.; Jiang, C.; Liang, F.; Song, Y. <i>Dalton Trans.</i> <b>2009</b> , 5290. [Co(H <sub>2</sub> O) <sub>6</sub> ](ClO <sub>4</sub> ) <sub>2</sub> ·2[Co <sub>3</sub> C <sub>30</sub> H <sub>36</sub> N <sub>6</sub> O <sub>15</sub> ]·4H <sub>2</sub> O                                                              |
| OXIVUO | 2.077 Å | Li, Y. H.; Ma, Z. G.; Yuan, B.; Ding, B. B.; Li, X. Z.; Zhu, L. N. <i>Koord. Khim.</i> <b>2016</b> , <i>42</i> , 546. [CoNi <sub>2</sub> C <sub>50</sub> H <sub>32</sub> N <sub>8</sub> O <sub>14</sub> ]·2.8H <sub>2</sub> O                                                                                                     |
| QUPQEY | 2.077 Å | Li, C.-P.; Yu, Q.; Chen, J.; Du, M. <i>Cryst. Growth Des.</i> <b>2010</b> , <i>10</i> , 2650. [Co(H <sub>2</sub> O) <sub>6</sub> ][Co <sub>2</sub> C <sub>40</sub> H <sub>34</sub> N <sub>8</sub> O <sub>22</sub> S <sub>2</sub> ]·10H <sub>2</sub> O                                                                             |
| YIXYIP | 2.077 Å | Tripuramallu, B. K.; Manna, P.; Das, S. K. <i>CrystEngComm</i> <b>2014</b> , <i>16</i> , 4816. [Co(H <sub>2</sub> O) <sub>6</sub> ][CoC <sub>15</sub> H <sub>11</sub> N <sub>6</sub> O <sub>4</sub> ] <sub>2</sub> ·2H <sub>2</sub> O                                                                                             |
| 9263   | 2.078 Å | Prelesnik, P. V.; Gabela, F.; Ribar, B.; Krstanovic, I. <i>Crystal Struct. Comm.</i> <b>1973</b> , <i>2</i> , 581. [Co(H <sub>2</sub> O) <sub>6</sub> ][NO <sub>3</sub> ] <sub>2</sub>                                                                                                                                            |
| DUVNEP | 2.078 Å | Klepov, V. V.; Serezhkina, L. B.; Pushkin, D. V.; Alekseev, E. V.; Grigor'ev, M. S.; Sergeeva, O. A.; Shimin, N. A.; Serezhkin, V. N. <i>Eur. J. Inorg. Chem.</i> <b>2016</b> , 118. [Co(H <sub>2</sub> O) <sub>6</sub> ][UO <sub>2</sub> (OOCCHCH <sub>2</sub> ) <sub>3</sub> ] <sub>2</sub>                                     |
| ESOHIE | 2.078 Å | Wei, M.-L.; Zhuang, P.-F.; Li, H.-H.; Yang, Y.-H. <i>Eur. J. Inorg. Chem.</i> <b>2011</b> , 1473. [Co(H <sub>2</sub> O) <sub>6</sub> ][HMo <sub>8</sub> O <sub>40</sub> P]·4(4-C <sub>5</sub> H <sub>4</sub> OCOOH)·4.5H <sub>2</sub> O                                                                                           |
| GIYDAU | 2.078 Å | Custelcean, R.; Remy, P.; Bonnesen, P. V.; Jiang, D.-E.; Moyer, B. A. <i>Angew. Chem., Int. Ed.</i> <b>2008</b> , <i>47</i> , 1866. [Co(H <sub>2</sub> O) <sub>6</sub> ]SO <sub>4</sub> ·2(C <sub>24</sub> H <sub>30</sub> N <sub>10</sub> O <sub>3</sub> )                                                                       |
| HEKDOQ | 2.078 Å | Steed, J. W.; McCool, B. J.; Junk, P. C. <i>J. Chem. Soc., Dalton Trans.</i> <b>1998</b> , 3417. [Co(H <sub>2</sub> O) <sub>6</sub> ](ClO <sub>4</sub> ) <sub>2</sub> ·C <sub>12</sub> H <sub>24</sub> O <sub>6</sub>                                                                                                             |
| IQOZUK | 2.078 Å | Li, Y.; Zou, W.-Q.; Wu, M.-F.; Lin, J.-D.; Zheng, F.-K.; Liu, Z.-F.; Wang, S.-H.; Guo, G.-C.; Huang, J.-S. <i>CrystEngComm</i> <b>2011</b> , <i>13</i> , 3868. [Co(H <sub>2</sub> O) <sub>6</sub> ][Co <sub>2</sub> C <sub>22</sub> H <sub>20</sub> N <sub>6</sub> O <sub>18</sub> ]·2H <sub>2</sub> O                            |
| LATNIG | 2.078 Å | Sohmiya, A.; Okuyama, T.; Suzuki, R.; Yamanishi, K.; Sugimoto, K.; Kondo, M. <i>Chem. Lett.</i> <b>2017</b> , <i>46</i> , 485. [Co(H <sub>2</sub> O) <sub>6</sub> ][CoC <sub>46</sub> H <sub>232</sub> Cl <sub>4</sub> O <sub>14</sub> ]·9H <sub>2</sub> O                                                                        |
| LEFXUQ | 2.078 Å | SeethaLekshmi, N.; Pedireddi, V. R. <i>Inorg. Chem.</i> <b>2006</b> , <i>45</i> , 2400. [Co(H <sub>2</sub> O) <sub>6</sub> ](p-(OH) <sub>2</sub> BC <sub>6</sub> H <sub>4</sub> COO) <sub>2</sub> ·4H <sub>2</sub> O                                                                                                              |
| NAZVOZ | 2.078 Å | Jirong Song; Rongzu Hu; Fuping Li; Tonglai Zhang; Zhihua Mao; Zonghua Zhou; Zhou Hong <i>Chin. Sci. Bull.</i> <b>1996</b> , <i>41</i> , 1806. [Co(H <sub>2</sub> O) <sub>6</sub> ](C <sub>2</sub> HN <sub>4</sub> O <sub>3</sub> ) <sub>2</sub> ·2H <sub>2</sub> O                                                                |

|        |         |                                                                                                                                                                                                                                                                                                                                                                                                       |
|--------|---------|-------------------------------------------------------------------------------------------------------------------------------------------------------------------------------------------------------------------------------------------------------------------------------------------------------------------------------------------------------------------------------------------------------|
| PICDOW | 2.078 Å | Klepov, V. V.; Peresyphkina, E. V.; Serezhkina, L. B.; Karasev, M. O.; Virovets, A. V.; Serezhkin, V. N. <i>Polyhedron</i> <b>2013</b> , <i>61</i> , 137. [Co(H <sub>2</sub> O) <sub>6</sub> ][UO <sub>2</sub> (O <sub>2</sub> CCH <sub>3</sub> ) <sub>3</sub> ] <sub>2</sub>                                                                                                                         |
| WILROB | 2.078 Å | Lou, X. CCDC deposition number 1583977, <b>2018</b> . [Co(H <sub>2</sub> O) <sub>6</sub> ][CoC <sub>12</sub> H <sub>12</sub> O <sub>18</sub> ]·2H <sub>2</sub> O                                                                                                                                                                                                                                      |
| RUDVES | 2.078 Å | Yao, G.-B.; Jiang, J.-X.; Yuan, L.-M.; Ren, X.-M. <i>Acta Crystallogr., Sect. E</i> <b>2009</b> , <i>65</i> , m1316. [Co(H <sub>2</sub> O) <sub>6</sub> ][CuC <sub>12</sub> H <sub>11</sub> N <sub>2</sub> O <sub>5</sub> ] <sub>2</sub> ·H <sub>2</sub> O                                                                                                                                            |
| 2900   | 2.079 Å | Lynton, H.; Siew, P. Y. <i>Can. J. Chem.</i> <b>1973</b> , <i>51</i> , 227. [Co(H <sub>2</sub> O) <sub>6</sub> ][SiF <sub>6</sub> ]                                                                                                                                                                                                                                                                   |
| 262613 | 2.079 Å | Donakowski, M. D.; Gautier, R.; Jeongho, Y.; Moore, D. T.; Nino, J. C.; Shiv Halasyamani, P.; Poeppelmeier, K. R. <i>J. Am. Chem. Soc.</i> <b>2012</b> , <i>134</i> , 7679. [Co(H <sub>2</sub> O) <sub>6</sub> ][VOF <sub>6</sub> (H <sub>2</sub> O)]                                                                                                                                                 |
| 760218 | 2.079 Å | Lacroix, M. R.; Bukovsky, E. V.; Lozinšek, M.; Folsom, T. C.; Newell, B. S.; Liu, Y.; Peryshkov, D. V.; Strauss, S. H. <i>Inorg. Chem.</i> <b>2018</b> , <i>57</i> , 14893. [Co(H <sub>2</sub> O) <sub>6</sub> ]B <sub>12</sub> F <sub>12</sub>                                                                                                                                                       |
| AZINEE | 2.079 Å | SeethaLekshmi, S.; Mangalampalli, K. S. R. N.; Hareesh, U. N. S; Ramamurty, U.; Varughese, S. <i>Cryst. Growth Des.</i> <b>2016</b> , <i>16</i> , 7271. [Co(H <sub>2</sub> O) <sub>6</sub> ] <sub>2</sub> [Co(H <sub>2</sub> O) <sub>4</sub> (C <sub>5</sub> H <sub>6</sub> N <sub>5</sub> ) <sub>2</sub> ](1,3,5-C <sub>6</sub> H <sub>3</sub> (COO) <sub>3</sub> ) <sub>2</sub> ·10H <sub>2</sub> O |
| FIWTUA | 2.079 Å | Shan; Y.; Huang, D. <i>Acta Crystallogr., Sect. C</i> <b>1999</b> , <i>55</i> , 921. [Co(H <sub>2</sub> O) <sub>6</sub> ](H <sub>3</sub> N(CH <sub>2</sub> ) <sub>2</sub> NH <sub>3</sub> )(HPO <sub>4</sub> ) <sub>2</sub>                                                                                                                                                                           |
| GOMVAG | 2.079 Å | Qiu, L.-G.; Gu, L.-N.; Hu, G.; Zhang, L. D. <i>J. Solid State Chem.</i> <b>2009</b> , <i>182</i> , 502. [Co(H <sub>2</sub> O) <sub>6</sub> ][CoC <sub>24</sub> H <sub>20</sub> N <sub>4</sub> O <sub>2</sub> ] <sub>2</sub> (1,3,5-C <sub>6</sub> H <sub>3</sub> (COO) <sub>3</sub> ) <sub>2</sub> ·22H <sub>2</sub> O                                                                                |
| KOMHAX | 2.079 Å | Huang, X.-F.; Ma, J.-X.; Liu, W.-S. <i>Inorg. Chem.</i> <b>2014</b> , <i>53</i> , 5922. [Co(H <sub>2</sub> O) <sub>6</sub> ][CoErC <sub>12</sub> H <sub>12</sub> O <sub>15</sub> ]·6H <sub>2</sub> O                                                                                                                                                                                                  |
| MOJBUL | 2.079 Å | Kumar, S. S.; Sreepriya, R. S.; Biju, S.; Sadasivan, V. <i>J. Mol. Struct.</i> <b>2019</b> , <i>1197</i> , 235. [Co(H <sub>2</sub> O) <sub>6</sub> ][CoC <sub>24</sub> H <sub>20</sub> N <sub>4</sub> O <sub>10</sub> ] <sub>2</sub> ·12H <sub>2</sub> O                                                                                                                                              |
| OGAFUZ | 2.079 Å | Tian, D.; Liu, S.-J.; Chang, Z.; Zhang, Y.-H.; Zhao, J.-P.; Bu, X.-H. <i>CrystEngComm</i> <b>2013</b> , <i>15</i> , 9344. Na <sub>18</sub> [Co(H <sub>2</sub> O) <sub>6</sub> ][Co <sub>8</sub> C <sub>48</sub> N <sub>36</sub> O <sub>48</sub> ]·33H <sub>2</sub> O                                                                                                                                  |
| POGPOT | 2.079 Å | Mohan, M.; Rajak, S.; Tremblay, A. A.; Maris, T.; Duong, A. <i>Dalton Trans.</i> <b>2019</b> , <i>48</i> , 7006. [Co(H <sub>2</sub> O) <sub>6</sub> ][Co(H <sub>2</sub> O) <sub>2</sub> (C <sub>6</sub> H <sub>3</sub> N <sub>7</sub> O <sub>3</sub> ) <sub>2</sub> ]                                                                                                                                 |
| YIRVUT | 2.079 Å | Lacroix, M. R.; Bukovsky, E. V.; Lozinsek, M.; Folsom, T. C.; Newell, B. S.; Liu, Y.; Peryshkov, D. V.; Strauss, S. H. <i>Inorg. Chem.</i> <b>2018</b> , <i>57</i> , 14983. [Co(H <sub>2</sub> O) <sub>6</sub> ]B <sub>12</sub> F <sub>12</sub>                                                                                                                                                       |
| YIVSUS | 2.079 Å | Wang, Y.-C.; Zhang, Z.-T.; Chang, Y. <i>Struct. Chem.</i> <b>2007</b> , <i>18</i> , 951. [Co(H <sub>2</sub> O) <sub>6</sub> ](C <sub>16</sub> H <sub>11</sub> O <sub>9</sub> S) <sub>2</sub> ·4H <sub>2</sub> O                                                                                                                                                                                       |
| 84282  | 2.080 Å | Baudrin, E.; Denis, S.; Touboul, M.; Nowogrocki, G. <i>Eur. J. Solid State Inorg. Chem.</i> <b>1997</b> , <i>34</i> , 1011. [Co(H <sub>2</sub> O) <sub>6</sub> ] <sub>2</sub> [CoDyC <sub>12</sub> H <sub>12</sub> O <sub>15</sub> ] <sub>2</sub> ·3H <sub>2</sub> O                                                                                                                                  |
| 143824 | 2.080 Å | Colliard, I.; Nyman, M. <i>Angew. Chem, Int. Ed.</i> <b>2021</b> , <i>60</i> , 7308. [Zn(H <sub>2</sub> O) <sub>6</sub> ] <sub>2</sub> Co <sub>2</sub> Ce <sub>2</sub> [Ce <sub>70</sub> (OH) <sub>36</sub> O <sub>64</sub> (SO <sub>4</sub> ) <sub>66</sub> (H <sub>2</sub> O) <sub>63</sub> ] <sub>250.5</sub> ·H <sub>2</sub> O                                                                    |
| 242284 | 2.080 Å | Klepov, V. V.; Peresyphkina, E. V.; Serezhkina, L. B.; Karasev, M. O.; Virovets, A. V.; Serezhkin, V. N. <i>Polyhedron</i> <b>2013</b> , <i>61</i> , 137. [Co(H <sub>2</sub> O) <sub>6</sub> ] <sub>2</sub> [UO <sub>2</sub> (CH <sub>3</sub> COO) <sub>3</sub> ] <sub>2</sub>                                                                                                                        |
| AVATAT | 2.080 Å | Li, J.-X.; Du, Z.-X.; Zhu, B.-L.; An, H.-Q.; Dong, J.-X.; Hu, X.-J.; Huang, W.-P. <i>Inorg. Chem. Commun.</i> <b>2011</b> , <i>14</i> , 522. (NH <sub>4</sub> ) <sub>2</sub> [Co(H <sub>2</sub> O) <sub>6</sub> ] <sub>2</sub> [V <sub>10</sub> O <sub>28</sub> ]·4H <sub>2</sub> O                                                                                                                   |

|          |         |                                                                                                                                                                                                                                                                                                                                                                                        |
|----------|---------|----------------------------------------------------------------------------------------------------------------------------------------------------------------------------------------------------------------------------------------------------------------------------------------------------------------------------------------------------------------------------------------|
| EGOFOY   | 2.080 Å | Black, D. T.; Kennedy, A. R.; Lobato, K. M. <i>Acta Crystallogr., Sect. C</i> <b>2019</b> , 75, 633.<br>[Co(H <sub>2</sub> O) <sub>6</sub> ](C <sub>18</sub> H <sub>14</sub> N <sub>2</sub> O <sub>7</sub> S <sub>2</sub> )·(CH <sub>3</sub> ) <sub>2</sub> NCHO                                                                                                                       |
| GUHMUU   | 2.080 Å | Liu, J.; Lu, Y.; Li, J.; Lu, W. <i>Dyes Pigm.</i> <b>2020</b> , 177, 108266.<br>[Co(H <sub>2</sub> O) <sub>6</sub> ][CoC <sub>26</sub> H <sub>28</sub> N <sub>4</sub> O <sub>6</sub> ](C <sub>10</sub> H <sub>4</sub> O <sub>8</sub> ) <sub>2</sub> ·2H <sub>2</sub> O                                                                                                                 |
| HEFSAM   | 2.080 Å | Shubnell, A. J.; Kosnic, E. J.; Squattrito, P. J. <i>Inorg. Chim. Acta</i> <b>1994</b> , 216, 101. [Co(H <sub>2</sub> O) <sub>6</sub> ] <sub>2</sub> (2-NO <sub>2</sub> -4-SO <sub>3</sub> -C <sub>6</sub> H <sub>3</sub> OH) <sub>2</sub>                                                                                                                                             |
| JIKYAG   | 2.080 Å | Zhu, S.; Hu, H.; Hu, J.; Li, J.; Hu, F.; Wang, Y. <i>J. Coord. Chem.</i> <b>2018</b> , 2441. [Co(H <sub>2</sub> O) <sub>6</sub> ] <sub>2</sub> (C <sub>10</sub> H <sub>7</sub> O <sub>3</sub> S) <sub>2</sub>                                                                                                                                                                          |
| ODIMEU   | 2.080 Å | Wang, Y.; Cheng, P.; Chen, J.; Liao, D.-Z.; Yan, S.-P. <i>Inorg. Chem.</i> <b>2007</b> , 46, 4530.<br>[Co(H <sub>2</sub> O) <sub>6</sub> ][Co <sub>2</sub> Sm <sub>2</sub> C <sub>24</sub> H <sub>24</sub> O <sub>30</sub> ]·3H <sub>2</sub> O                                                                                                                                         |
| TERKIK   | 2.080 Å | Gunderman, B. J.; Dubey, S. N.; Squattrito, P. J. <i>Acta Crystallogr., Sect. C</i> <b>1997</b> , 53, 17.<br>[Co(H <sub>2</sub> O) <sub>6</sub> ](C <sub>7</sub> H <sub>8</sub> NO <sub>3</sub> S) <sub>2</sub>                                                                                                                                                                        |
| TICPOL   | 2.080 Å | Schull, T. L.; Henley, L.; Deschamps, J. R.; Butcher, R. J.; Maher, D. P.; Klug, C. A.; Swider-Lyons, K.; Dressick, W. J.; Bujoli, B.; Greenwood, A. E.; Congiardo, L. K. B.; Knight, D. A. <i>Organometallics</i> <b>2007</b> , 26, 2272. [Co(H <sub>2</sub> O) <sub>6</sub> ][Co <sub>5</sub> C <sub>39</sub> H <sub>59</sub> O <sub>38</sub> P <sub>8</sub> ]·22.87H <sub>2</sub> O |
| VETYEB   | 2.080 Å | Felder, J. B.; Smith, M.; zur Loye, H.-C. <i>Cryst. Growth Des.</i> <b>2018</b> , 18, 1236. [Co(H <sub>2</sub> O) <sub>6</sub> ] <sub>3</sub> [U <sub>2</sub> O <sub>4</sub> F <sub>7</sub> ] <sub>2</sub>                                                                                                                                                                             |
| WABFAI   | 2.080 Å | Song, H.-Y.; Wang, X.-J.; Qiu, S.-Z.; Feng, Y.-L. <i>Acta Crystallogr., Sect. E</i> <b>2010</b> , 66, m1577.<br>[Co(H <sub>2</sub> O) <sub>6</sub> ][CoC <sub>12</sub> H <sub>16</sub> N <sub>2</sub> O <sub>4</sub> ] <sub>2</sub> (C <sub>11</sub> H <sub>7</sub> O <sub>8</sub> ) <sub>2</sub> ·4H <sub>2</sub> O                                                                   |
| WIGTUC   | 2.080 Å | Aghabozorg, H.; Gharamaleki, J. A.; Ghadermazi, M.; Ghasemikhah, P.; Soleimannejad, J. <i>Acta Crystallogr., Sect. E</i> <b>2007</b> , 63, m1803.                                                                                                                                                                                                                                      |
| 34759    | 2.081 Å | Ray, S.; Zalkin, A.; Templeton, D. H. <i>Acta Crystallogr., Sect. B</i> <b>1973</b> , 53, 2741. [Co(H <sub>2</sub> O) <sub>6</sub> SiF <sub>6</sub>                                                                                                                                                                                                                                    |
| 59902    | 2.081 Å | Chen, S.-M.; Lu, C.-Z.; Yu, Y.-Q.; Zhang, Q.-Z.; He, X. <i>Acta Crystallogr., Sect. E</i> <b>2004</b> , 60, m723.<br>(N(CH <sub>3</sub> ) <sub>4</sub> ) <sub>2</sub> [Co(H <sub>2</sub> O) <sub>6</sub> ][Mo <sub>8</sub> O <sub>26</sub> ]                                                                                                                                           |
| 69393    | 2.081 Å | Waizumi, K.; Masuda, H.; Ohtaki, H.; Tsukamoto, K.; Sunagawa, I. <i>Bull. Che. Soc. Jpn.</i> <b>1990</b> , 63, 3426.<br>[Co(H <sub>2</sub> O) <sub>6</sub> ]Cl <sub>2</sub>                                                                                                                                                                                                            |
| 109741   | 2.081 Å | Imanakunov, B. I.; Ivashinkhorloogiyn, S.; Baydina, I. A.; Stabnikov, P. A.; Toktomatov, T. A. <i>Izv. Akad. Nauk Resp. Kyrg. Khim. Tek. Biol. Nauki</i> <b>1991</b> , 7. [Co(H <sub>2</sub> O) <sub>6</sub> ](HCOO) <sub>2</sub> (CH <sub>2</sub> ) <sub>6</sub> N <sub>4</sub> ) <sub>2</sub> ·4H <sub>2</sub> O                                                                     |
| AQCOAM01 | 2.081 Å | Chopra, D.; Dagur, P.; Prakash, A. S.; Row, T. N. G.; Hegde, M. S. <i>J. Cryst. Growth</i> <b>2005</b> , 275, e-2049.<br>[Co(H <sub>2</sub> O) <sub>6</sub> ](NO <sub>3</sub> ) <sub>2</sub> ·2C <sub>6</sub> H <sub>12</sub> N <sub>4</sub> ·4H <sub>2</sub> O                                                                                                                        |
| AXEKEW   | 2.081 Å | Zhao, G. Liu, J. <i>RSC Adv.</i> <b>2021</b> , 11, 24500. [Co(H <sub>2</sub> O) <sub>6</sub> ]( <i>p</i> -C <sub>6</sub> H <sub>4</sub> (COO) <sub>2</sub> )·C <sub>14</sub> H <sub>12</sub> N <sub>2</sub> O <sub>4</sub> ·3H <sub>2</sub> O                                                                                                                                          |
| CAGVOV01 | 2.081 Å | Rochon, F. R.; Massarweh, G. <i>Inorg. Chim. Acta</i> <b>2000</b> , 304, 190. [Co(H <sub>2</sub> O) <sub>6</sub> ](C <sub>10</sub> H <sub>4</sub> O <sub>8</sub> )                                                                                                                                                                                                                     |
| CAGVOV02 | 2.081 Å | Kumagai, H.; Kepert, C. J.; Kurmoo, M. <i>Inorg. Chem.</i> <b>2002</b> , 41, 3410. [Co(H <sub>2</sub> O) <sub>6</sub> ](C <sub>10</sub> H <sub>4</sub> O <sub>8</sub> )                                                                                                                                                                                                                |
| EWOPEL   | 2.081 Å | Chen; S.-M.; Lu; C.-Z.; Yu; Y.-Q.; Zhang; Q.-Z.; He, X. <i>Acta Crystallogr., Sect. E</i> <b>2004</b> , 60, m723.<br>((CH <sub>3</sub> ) <sub>4</sub> N) <sub>2</sub> [Co(H <sub>2</sub> O) <sub>6</sub> ][Mo <sub>8</sub> O <sub>26</sub> ]                                                                                                                                           |



|          |         |                                                                                                                                                                                                                                                                                                                                                                                                                                                      |
|----------|---------|------------------------------------------------------------------------------------------------------------------------------------------------------------------------------------------------------------------------------------------------------------------------------------------------------------------------------------------------------------------------------------------------------------------------------------------------------|
| EYARON   | 2.081 Å | Bin, Z. CCDC deposition number 739541, <b>2016</b> . [Co(H <sub>2</sub> O) <sub>6</sub> ](ClO <sub>4</sub> ) <sub>2</sub> ·5C <sub>4</sub> H <sub>8</sub> O <sub>2</sub>                                                                                                                                                                                                                                                                             |
| GUHMUU   | 2.081 Å | Liu, J.; Lu, Y.; Li, J.; Lu, W. <i>Dyes Pigm.</i> <b>2020</b> , <i>177</i> , 108266.                                                                                                                                                                                                                                                                                                                                                                 |
| IWONIR   | 2.081 Å | [Co(H <sub>2</sub> O) <sub>6</sub> ][CoC <sub>26</sub> H <sub>28</sub> N <sub>4</sub> O <sub>6</sub> ](C <sub>10</sub> H <sub>4</sub> O <sub>8</sub> ) <sub>2</sub> ·2H <sub>2</sub> O<br>Zhang, Z.-Y.; Gao, S.; Huo, L.-H.; Zhao, H.; Zhao, J.-G.; Ng, S. W. <i>Acta Crystallogr., Sect. E</i> <b>2004</b> , <i>60</i> , m723. [Co(H <sub>2</sub> O) <sub>6</sub> ](C <sub>7</sub> H <sub>6</sub> NO <sub>3</sub> ) <sub>2</sub> ·2H <sub>2</sub> O |
| PDACCO   | 2.081 Å | McCandlish, E. F. K.; Michael, T. K.; Neal, J. A.; Lingafelter, E. C.; Rose, N. J. <i>Inorg. Chem.</i> <b>1978</b> , <i>17</i> , 1383. Na <sub>2</sub> [Co(H <sub>2</sub> O) <sub>6</sub> ][CoC <sub>14</sub> H <sub>12</sub> N <sub>2</sub> O <sub>8</sub> ) <sub>2</sub> ·4H <sub>2</sub> O                                                                                                                                                        |
| QIZFUA01 | 2.081 Å | Sakane, G.; Kawasaki, H.; Oomori, T.; Yamasaki, M.; Adachi, H.; Shibahara, T. <i>J. Cluster Sci.</i> <b>2002</b> , <i>13</i> , 75. [Co(H <sub>2</sub> O) <sub>6</sub> ] <sub>2</sub> [CdMo <sub>6</sub> C <sub>36</sub> H <sub>42</sub> N <sub>6</sub> O <sub>36</sub> S <sub>8</sub> ]·22H <sub>2</sub> O                                                                                                                                           |
| SUJPES   | 2.081 Å | Kepert, C. J.; Heseck, D.; Beer, P. D.; Rosseinsky, M. J. <i>Angew. Chem., Int. Ed.</i> <b>1998</b> , <i>37</i> , 3158. [Co(H <sub>2</sub> O) <sub>6</sub> ](C <sub>10</sub> H <sub>2</sub> O <sub>8</sub> S <sub>4</sub> )·2H <sub>2</sub> O                                                                                                                                                                                                        |
| UZIFER   | 2.081 Å | Huang, Y.-R.; Lin, X.-L.; Chen, B.; Zheng, H.-D.; Chen, Z.-R.; Li, H.-H.; Zheng, S.T. <i>Angew. Chem., Int. Ed.</i> <b>2021</b> , <i>60</i> , 16911. [Co(H <sub>2</sub> O) <sub>6</sub> ] <sub>2</sub> [Co <sub>7</sub> W <sub>18</sub> P <sub>2</sub> C <sub>40</sub> H <sub>56</sub> N <sub>8</sub> O <sub>88</sub> ] <sub>2</sub> ·2ONC <sub>3</sub> H <sub>4</sub> C <sub>3</sub> H <sub>4</sub> NO·16H <sub>2</sub> O                           |
| VIXCAH   | 2.081 Å | Gu, J.; Zhu, Q.-Y.; Zhang, Y.; Lu, W.; Niu, G.-Y.; Dai, J. <i>Inorg. Chem. Commun.</i> <b>2008</b> , <i>11</i> , 175. [Co(H <sub>2</sub> O) <sub>6</sub> ][Co(OCHN(CH <sub>3</sub> ) <sub>2</sub> ) <sub>2</sub> (C <sub>10</sub> H <sub>6</sub> N <sub>2</sub> O <sub>4</sub> S <sub>6</sub> ) <sub>2</sub> ]·2(CH <sub>3</sub> ) <sub>2</sub> NCHO·H <sub>2</sub> O                                                                                |
| VOPMOC   | 2.081 Å | Perez, J. M. G.; Gutierrez, J. N.; Dung, N.-H.; Voissat, B.; Busnot, A.; Wintenberger, M. <i>Inorg. Chim. Acta</i> <b>1991</b> , <i>184</i> , 243. [Co(H <sub>2</sub> O) <sub>6</sub> ][Co <sub>2</sub> C <sub>14</sub> H <sub>20</sub> N <sub>2</sub> O <sub>14</sub> ]·4H <sub>2</sub> O                                                                                                                                                           |
| YITNOE   | 2.081 Å | Imanakunov, B. I.; Ivashinkhorloogiyn, S.; Baydina, I. A.; Stabnikov, P. A.; Toktomatov, T. A. <i>Izv. Akad. Nauk Resp. Kyrg. Khim. Tek. Biol. Nauki</i> <b>1991</b> , <i>7</i> . [Co(H <sub>2</sub> O) <sub>6</sub> ](HCOO) <sub>2</sub> ·2C <sub>6</sub> H <sub>12</sub> N <sub>4</sub> ·4H <sub>2</sub> O                                                                                                                                         |
| BEZYUA   | 2.082 Å | Chuklanova, E. B.; Polynova, T. N.; Porai-Koshits, M.A.; Konstantinovskaya, M. A.; Sinyavskaya, E. I. <i>Koord. Khim.</i> <b>1982</b> , <i>8</i> , 236. [Co(H <sub>2</sub> O) <sub>6</sub> ](HO <sub>3</sub> PCCHCHPO <sub>3</sub> H)·2H <sub>2</sub> O                                                                                                                                                                                              |
| BIZSOT   | 2.082 Å | Akashi, H.; Ichikawa, M. <i>Acta Crystallogr., Sect. E</i> <b>2008</b> , <i>64</i> , m797. [Co(H <sub>2</sub> O) <sub>6</sub> ] <sub>2</sub> (C <sub>24</sub> H <sub>12</sub> O <sub>16</sub> S <sub>8</sub> )·H <sub>2</sub> O                                                                                                                                                                                                                      |
| COHDPH   | 2.082 Å | Adiwidjaja, G.; Rossmanith, E.; Kuppers, H. <i>Acta Crystallogr., Sect. B</i> <b>1978</b> , <i>34</i> , 3079. [Co(H <sub>2</sub> O) <sub>6</sub> ](m-C <sub>6</sub> H <sub>4</sub> COO(COOH)) <sub>2</sub>                                                                                                                                                                                                                                           |
| DIJSIZ   | 2.082 Å | Jakonen, M.; Hirva, P.; Nivajarvi, T.; Kallinen, M.; Haukka, M. <i>Eur. J. Inorg. Chem.</i> <b>2007</b> , 3497. [Co(H <sub>2</sub> O) <sub>6</sub> ][OsCl <sub>3</sub> (CO) <sub>3</sub> ] <sub>2</sub>                                                                                                                                                                                                                                              |
| FIWTUA01 | 2.082 Å | You, X.; Zhu, L. <i>Ind. J. Chem., Sect. A</i> <b>2010</b> , <i>49</i> , 1478. [Co(H <sub>2</sub> O) <sub>6</sub> ](H <sub>3</sub> N(CH <sub>2</sub> ) <sub>2</sub> NH <sub>3</sub> )(HPO <sub>4</sub> ) <sub>2</sub>                                                                                                                                                                                                                                |
| GAYTOS   | 2.082 Å | Yerra, S.; Das, S. K. <i>J. Mol. Struct.</i> <b>2017</b> , <i>1146</i> , 23. [Co(H <sub>2</sub> O) <sub>6</sub> ][CoNa <sub>2</sub> H <sub>24</sub> V <sub>10</sub> O <sub>40</sub> ]·4H <sub>2</sub> O                                                                                                                                                                                                                                              |
| GINVUV   | 2.082 Å | Deng, Y.-F.; Zhang, H.-L.; Hong, Q.-M.; Weng, W.-Z.; Wan, H.-L.; Zhou, Z.-H. <i>J. Solid State Chem.</i> <b>2007</b> , <i>180</i> , 3152. (NH <sub>4</sub> ) <sub>2</sub> [Co(H <sub>2</sub> O) <sub>6</sub> ][Ti(C <sub>6</sub> H <sub>6</sub> O <sub>7</sub> ) <sub>3</sub> ] <sub>2</sub> ·6H <sub>2</sub> O                                                                                                                                      |
| IMAFIL   | 2.082 Å | Radanovic, D. D.; Rychlewska, U.; Djuran, M. I.; Draskovic, N. S.; Vasojevic, M. M.; Hodzic, I. M.; Radanovic, D. J. <i>Polyhedron</i> <b>2003</b> , <i>22</i> , 2745. [Co(H <sub>2</sub> O) <sub>6</sub> ][CoC <sub>11</sub> H <sub>14</sub> N <sub>2</sub> O <sub>8</sub> ]·2H <sub>2</sub> O                                                                                                                                                      |

|          |         |                                                                                                                                                                                                                                                                                                                                     |
|----------|---------|-------------------------------------------------------------------------------------------------------------------------------------------------------------------------------------------------------------------------------------------------------------------------------------------------------------------------------------|
| PUNSLA   | 2.082 Å | Braga, D.; Angeloni, A.; Tagliavini, E.; Grepioni, F. <i>J. Chem. Soc., Dalton Trans.</i> <b>1998</b> , 1961.<br>[Co(H <sub>2</sub> O) <sub>6</sub> ][Co(C <sub>5</sub> H <sub>5</sub> ) <sub>2</sub> ](1,3,5-(COO) <sub>3</sub> C <sub>6</sub> H <sub>3</sub> )                                                                    |
| QODBOB   | 2.082 Å | Wu, M.; Yuan, D.; Jiang, F.; Chen, B.; Gao, Q.; Wei, W.; Hong, M. <i>Supramol. Chem.</i> <b>2008</b> , <i>20</i> , 289.<br>[Co(H <sub>2</sub> O) <sub>6</sub> ](C <sub>12</sub> H <sub>14</sub> N <sub>2</sub> ) <sub>3</sub> [Co <sub>2</sub> C <sub>48</sub> H <sub>48</sub> O <sub>36</sub> S <sub>16</sub> ]·14H <sub>2</sub> O |
| SUDGOQ   | 2.082 Å | Amanchi, S. R.; Das, S. K. <i>Front. Chem.</i> <b>2018</b> , <i>6</i> , 469. [Co(H <sub>2</sub> O) <sub>6</sub> ] <sub>3</sub> (4-C <sub>5</sub> H <sub>4</sub> N-NH <sub>2</sub> ) <sub>6</sub> [V <sub>10</sub> O <sub>28</sub> ] <sub>2</sub> ·14H <sub>2</sub> O                                                                |
| UGENUQ   | 2.082 Å | Jing Han, Yong J. H.; Xing, Y. H.; Bai, F. Y.; Zhang, X. J.; Zeng, X. Q.; Ge, M.-F. <i>J. Coord. Chem.</i> <b>2009</b> , <i>62</i> , 2917. [Co(H <sub>2</sub> O) <sub>6</sub> ][Co(C <sub>9</sub> H <sub>7</sub> NO <sub>3</sub> ) <sub>2</sub> ]·H <sub>2</sub> O                                                                  |
| 89820    | 2.083 Å | Friedrich, A.; Wildner, M.; Tillmanns, E.; Merz, P. L. <i>Am. Mineral.</i> <b>2000</b> , <i>85</i> , 593.<br>[Co(H <sub>2</sub> O) <sub>6</sub> ][Sb(OH) <sub>6</sub> ] <sub>2</sub>                                                                                                                                                |
| AVOLII   | 2.083 Å | Klepov, V. V.; Serezhkina, L. B.; Serezhkin, V. N.; Alekseev, E. V. <i>J. Solid State Chem.</i> <b>2016</b> , <i>244</i> , 100.<br>[Co(H <sub>2</sub> O) <sub>6</sub> ][Na(UO <sub>2</sub> (OOCCH <sub>3</sub> ) <sub>3</sub> ) <sub>3</sub> ]                                                                                      |
| AQCOAM03 | 2.083 Å | Singh, G.; Baranwal, B. P.; Kapoor, I. P. S.; Kumar, D.; Singh, C. P.; Frohlich, R. <i>J. Thermal Anal. Calorimetry</i> <b>2008</b> , <i>91</i> , 971. [Co(H <sub>2</sub> O) <sub>6</sub> ](NO <sub>3</sub> ) <sub>2</sub> ·2C <sub>6</sub> H <sub>12</sub> N <sub>4</sub> ·4H <sub>2</sub> O                                       |
| BIYTUY   | 2.083 Å | Egharevba, G. O.; Megnamisi-Belombe, M.; Endres, H.; Rossato, E. <i>Acta Crystallogr., Sect. B</i> <b>1982</b> , <i>38</i> , 2901. [Co(H <sub>2</sub> O) <sub>6</sub> ][CoC <sub>4</sub> H <sub>6</sub> Br <sub>2</sub> N <sub>4</sub> O <sub>4</sub> ] <sub>2</sub> ·2(CH <sub>3</sub> ) <sub>2</sub> CO                           |
| GEPGUE   | 2.083 Å | De-Wu Sun; Qi Zhang; Hong-Ju Zhai <i>Acta Crystallogr., Sect. E</i> <b>2006</b> , <i>62</i> , m2270.<br>(H <sub>3</sub> O) <sub>4</sub> [Co(H <sub>2</sub> O) <sub>6</sub> ][CoC <sub>11</sub> H <sub>14</sub> N <sub>2</sub> O <sub>8</sub> ] <sub>2</sub> [Mo <sub>8</sub> O <sub>26</sub> ]·6H <sub>2</sub> O                    |
| KAGMUB   | 2.083 Å | Jian-Fang Ma; Jin Yang; Jing-Fu Liu <i>Acta Crystallogr., Sect. E</i> <b>2003</b> , <i>59</i> , m481.<br>[Co(H <sub>2</sub> O) <sub>6</sub> ] <sub>2</sub> (C <sub>7</sub> H <sub>5</sub> O <sub>6</sub> S) <sub>2</sub> ·4H <sub>2</sub> O                                                                                         |
| KEJVUU   | 2.083 Å | Bettinger, R. T.; Squattrito, P. J.; Aulakh, D.; Gianopoulos, C. G. <i>Acta Crystallogr., Sect. E</i> <b>2022</b> , <i>78</i> , 961. [Co(H <sub>2</sub> O) <sub>6</sub> ]( <i>m</i> -C <sub>6</sub> H <sub>4</sub> COOH(SO <sub>3</sub> )) <sub>2</sub> ·2H <sub>2</sub> O                                                          |
| KUYPIE   | 2.093 Å | Kennedy, A. R.; McKellar, S. C.; Okoth, M. O. <i>Acta Crystallogr., Sect. E</i> <b>2010</b> , <i>66</i> , m1330.<br>[Co(H <sub>2</sub> O) <sub>6</sub> ]C <sub>16</sub> H <sub>10</sub> N <sub>2</sub> O <sub>6</sub> S <sub>7</sub> ·4H <sub>2</sub> O                                                                             |
| QEYZOK   | 2.083 Å | Manna, S. C.; Zangrando, E.; Ribas, J.; Chaudhuri, N. R. <i>Dalton Trans.</i> <b>2007</b> , 1383.<br>[Co(H <sub>2</sub> O) <sub>6</sub> ][CoC <sub>18</sub> H <sub>16</sub> N <sub>2</sub> O <sub>8</sub> ]( <i>p</i> -C <sub>6</sub> H <sub>4</sub> (COO) <sub>2</sub> ) <sub>2</sub> ·6H <sub>2</sub> O                           |
| WANREJ   | 2.083 Å | Zhao-Hui Zhou; Yuan-Fu Deng; Hui-Lin Wan <i>Cryst. Growth Des.</i> <b>2005</b> , <i>5</i> , 1109.<br>[Co(H <sub>2</sub> O) <sub>6</sub> ][CoC <sub>12</sub> H <sub>14</sub> O <sub>16</sub> ]·2H <sub>2</sub> O                                                                                                                     |
| 73397    | 2.084 Å | Blackburn, A. C.; Gerkin, R. E. <i>Acta Crystallogr., Sect. C</i> <b>1993</b> , <i>49</i> , 1271. [Co(H <sub>2</sub> O) <sub>6</sub> ](BrO <sub>4</sub> ) <sub>2</sub>                                                                                                                                                              |
| 121698   | 2.084 Å | Sahu, P. K.; Mondal, A.; Konar, S. <i>Dalton Trans.</i> <b>2021</b> , <i>50</i> , 3825.<br>[Co(H <sub>2</sub> O) <sub>6</sub> ][Na <sub>4</sub> (H <sub>2</sub> O) <sub>16</sub> ][V <sub>10</sub> O <sub>28</sub> ]·2H <sub>2</sub> O                                                                                              |
| AJETEO   | 2.084 Å | Lee; U.; Jung; Y.-H.; Joo; H.-C.; Park, K.-M. <i>Acta Crystallogr., Sect. E</i> <b>2003</b> , <i>59</i> , m421.<br>[Co(H <sub>2</sub> O) <sub>6</sub> ] <sub>3</sub> [V <sub>10</sub> O <sub>28</sub> ]·2C <sub>12</sub> H <sub>24</sub> O <sub>6</sub> ·10H <sub>2</sub> O                                                         |
| AQCOAM   | 2.084 Å | Viossat, B.; Khodadad, P.; Rodier, N. <i>Bull. Chem. Soc. Fr.</i> <b>1981</b> , 69. [Co(H <sub>2</sub> O) <sub>6</sub> ](NO <sub>3</sub> ) <sub>2</sub> ·2C <sub>6</sub> H <sub>12</sub> N <sub>4</sub> ·4H <sub>2</sub> O                                                                                                          |

|          |         |                                                                                                                                                                                                                                                                                                                                                                                                                    |
|----------|---------|--------------------------------------------------------------------------------------------------------------------------------------------------------------------------------------------------------------------------------------------------------------------------------------------------------------------------------------------------------------------------------------------------------------------|
| ASGLCO   | 2.084 Å | Nassimbeni, L. R.; Percy, G. C.; Rodgers, A. L. <i>Acta Crystallogr., Sect. B</i> <b>1976</b> , 32, 1252. [Co(H <sub>2</sub> O) <sub>6</sub> ][CoC <sub>18</sub> H <sub>14</sub> N <sub>2</sub> O <sub>6</sub> ] <sub>2</sub> ·H <sub>2</sub> O                                                                                                                                                                    |
| COHDPH01 | 2.084 Å | Kuppers, H. Z. <i>Kristallogr.</i> <b>1990</b> , 192, 97. [Co(H <sub>2</sub> O) <sub>6</sub> ]( <i>m</i> -C <sub>6</sub> H <sub>4</sub> COO(COOH)) <sub>2</sub>                                                                                                                                                                                                                                                    |
| DIYHUR   | 2.084 Å | Hou, Y.; An, H.; Chang, S.; Zhang, J. <i>Cat Sci. Tech.</i> <b>2019</b> , 9, 2445. Rb <sub>2</sub> [Co(H <sub>2</sub> O) <sub>6</sub> ][CoAs <sub>2</sub> Mo <sub>12</sub> C <sub>16</sub> H <sub>42</sub> N <sub>4</sub> O <sub>57</sub> ]·12H <sub>2</sub> O                                                                                                                                                     |
| FEGMAF   | 2.084 Å | Brach, I.; Roziere, J.; Anselment, B.; Peters, K. <i>Acta Crystallogr., Sect. C</i> <b>1987</b> , 43, 458. [Co(H <sub>2</sub> O) <sub>6</sub> ] <sub>2</sub> (C <sub>4</sub> HO <sub>4</sub> ) <sub>2</sub> ·2H <sub>2</sub> O                                                                                                                                                                                     |
| IRONIM   | 2.084 Å | Dao-Li An; Shan Gao; Zhi-Biao Zhu; Li-Hua Huo; Hui Zhao <i>Acta Crystallogr., Sect. E</i> <b>2004</b> , 60, m111. [Co(H <sub>2</sub> O) <sub>6</sub> ]C <sub>10</sub> H <sub>6</sub> O <sub>6</sub> S <sub>2</sub>                                                                                                                                                                                                 |
| NOPDIH   | 2.084 Å | Mobin, S. M.; Mohammad, A. <i>Dalton Trans.</i> <b>2014</b> , 43, 13032. [Co(H <sub>2</sub> O) <sub>6</sub> ]SO <sub>4</sub>                                                                                                                                                                                                                                                                                       |
| RAXHAC   | 2.084 Å | Pavliuk, M. V. Mijangos, E.; Makhankova, V. G.; Kokozay, V. N.; Pullen, S.; Liu, J.; Zhu, J.; Styring, S.; Thapper, A. <i>ChemSusChem</i> <b>2016</b> , 9, 2957. (NH <sub>4</sub> ) <sub>2</sub> [Co(H <sub>2</sub> O) <sub>6</sub> ] <sub>2</sub> [V <sub>10</sub> O <sub>28</sub> ]·4H <sub>2</sub> O                                                                                                            |
| UZIFER   | 2.084 Å | Huang, Y.-R.; Lin, X.-L.; Chen, B.; Zheng, H.-D.; Chen, Z.-R.; Li, H.-H.; Zheng, S.T. <i>Angew. Chem., Int. Ed.</i> <b>2021</b> , 60, 16911. [Co(H <sub>2</sub> O) <sub>6</sub> ] <sub>2</sub> [Co <sub>7</sub> W <sub>18</sub> P <sub>2</sub> C <sub>40</sub> H <sub>56</sub> N <sub>8</sub> O <sub>88</sub> ] <sub>2</sub> ·2ONC <sub>5</sub> H <sub>4</sub> C <sub>5</sub> H <sub>4</sub> NO·14H <sub>2</sub> O |
| VAWXAS03 | 2.084 Å | Atria, A. M.; Garland, M. T.; Baggio, R. <i>J. Chil. Chem. Soc.</i> <b>2013</b> , 58, 1576. [Co(H <sub>2</sub> O) <sub>6</sub> ][CoC <sub>10</sub> H <sub>10</sub> O <sub>12</sub> ]·8H <sub>2</sub> O                                                                                                                                                                                                             |
| WURRIM   | 2.084 Å | Palmucci, J.; Mahmudov, K. T.; Fatima M.; Guedes da Silva, C.; Martins, L. M. D. R. S.; Marchetti, F.; Pettinari, C.; Pombeiro, A. J. L. <i>RSC Adv.</i> <b>2015</b> , 5, 84142. [Co(H <sub>2</sub> O) <sub>6</sub> ](C <sub>10</sub> H <sub>7</sub> N <sub>4</sub> O <sub>6</sub> S) <sub>2</sub> ·8H <sub>2</sub> O                                                                                              |
| WUZNEL   | 2.084 Å | Zhang, M.-L.; Xing, F.-G.; Wang, Z.-L. <i>Jiegou Huaxue</i> <b>2010</b> , 29, 592. [Co(H <sub>2</sub> O) <sub>6</sub> ](C <sub>8</sub> H <sub>7</sub> O <sub>4</sub> ) <sub>2</sub> ·2H <sub>2</sub> O                                                                                                                                                                                                             |
| 62985    | 2.085 Å | Elerman, Y. <i>Acta Crystallogr., Sect. C</i> <b>1988</b> , 44, 599. [Co(H <sub>2</sub> O) <sub>6</sub> ]SO <sub>4</sub>                                                                                                                                                                                                                                                                                           |
| 281298   | 2.085 Å | Lee, U.; Jung, Y.-H.; Joo, H.-C. <i>Acta Crystallogr., Sect. E</i> <b>2003</b> , 59, i72. K <sub>2</sub> [Co(H <sub>2</sub> O) <sub>6</sub> ] <sub>2</sub> [V <sub>10</sub> O <sub>28</sub> ]·4H <sub>2</sub> O                                                                                                                                                                                                    |
| 427973   | 2.085 Å | Yerra, S.; Das, S. K. <i>J. Mol. Struct.</i> <b>2017</b> , 1146, 23. [Co(H <sub>2</sub> O) <sub>6</sub> ][(Na <sub>2</sub> (H <sub>2</sub> O) <sub>6</sub> (H <sub>2</sub> O) <sub>4</sub> Co(H <sub>2</sub> O) <sub>2</sub> ][V <sub>10</sub> O <sub>28</sub> ]·4H <sub>2</sub> O                                                                                                                                 |
| AKEHAA   | 2.085 Å | Wilk, M.; Janczak, J.; Videnova-Adrabsinska, V. <i>Acta Crystallogr., Sect. C</i> <b>2011</b> , 67, m9. [Co(H <sub>2</sub> O) <sub>6</sub> ]( <i>p</i> -HOCC <sub>6</sub> H <sub>4</sub> PO <sub>3</sub> ) <sub>2</sub> ·2( <i>p</i> -HOCC <sub>6</sub> H <sub>4</sub> PO <sub>3</sub> H)·2H <sub>2</sub> O                                                                                                        |
| AWONAC   | 2.085 Å | Sahbani, T.; Sta, W. S.; Al-Deyab, S. S.; Rzaigui, M. <i>Acta Crystallogr., Sect. E</i> <b>2011</b> , 67, m1079. [Co(H <sub>2</sub> O) <sub>6</sub> ] <sub>2</sub> (C <sub>5</sub> H <sub>14</sub> N <sub>2</sub> )(SO <sub>4</sub> ) <sub>3</sub>                                                                                                                                                                 |
| BAFBAN   | 2.085 Å | Zhang, M.-S.; Sun, B.-W.; Fang, R.-B.; Zhao, Q.-H. <i>Zh. Strukt. Khim.</i> <b>2010</b> , 51, 1180. [Co(H <sub>2</sub> O) <sub>6</sub> ] <sub>2</sub> [CoC <sub>14</sub> H <sub>6</sub> N <sub>2</sub> O <sub>8</sub> ] <sub>2</sub> ·2C <sub>2</sub> H <sub>4</sub> N <sub>4</sub> ·2H <sub>2</sub> O                                                                                                             |
| FAKVEU   | 2.085 Å | Kammoun, O.; Loulou, N.; Rekik, W.; Naili, H.; Mhiri, T.; Bataille, T. <i>J. Chem. Cryst.</i> <b>2012</b> , 42, 103. [Co(H <sub>2</sub> O) <sub>6</sub> ](C <sub>6</sub> H <sub>14</sub> N <sub>2</sub> )(SeO <sub>4</sub> ) <sub>2</sub>                                                                                                                                                                          |
| FUNQAG   | 2.085 Å | Horn, E.; Botello, A. F.; Salas, J. M.; Tiekink, E. R. T. <i>Z. Kristallogr. - New Cryst. Struc.</i> <b>2000</b> , 215, 441. [Co(H <sub>2</sub> O) <sub>6</sub> ](C <sub>9</sub> H <sub>9</sub> N <sub>4</sub> O <sub>4</sub> ) <sub>2</sub> ·4H <sub>2</sub> O                                                                                                                                                    |

|          |         |                                                                                                                                                                                                                                                                                                                                                                |
|----------|---------|----------------------------------------------------------------------------------------------------------------------------------------------------------------------------------------------------------------------------------------------------------------------------------------------------------------------------------------------------------------|
| HIDTAS   | 2.085 Å | Wang, X.; Bai, X.; Lin, H.; Sun, J.; Wang, X.; Liu, G. <i>RSC Adv.</i> <b>2018</b> , <i>8</i> , 22676.<br>[Co(H <sub>2</sub> O) <sub>6</sub> ][CoMo <sub>6</sub> TeC <sub>18</sub> H <sub>22</sub> N <sub>14</sub> O <sub>28</sub> ]·3H <sub>2</sub> O                                                                                                         |
| JEDXOJ   | 2.085 Å | de J. Velazquez-Garcia, J.; Techert, S. <i>Acta Crystallogr., Sect. E</i> <b>2022</b> , <i>78</i> , 814.<br>(C <sub>4</sub> H <sub>7</sub> N <sub>2</sub> ) <sub>2</sub> [Co(H <sub>2</sub> O) <sub>6</sub> ][CoC <sub>18</sub> H <sub>14</sub> O <sub>16</sub> ]                                                                                              |
| KOMGUQ   | 2.085 Å | Huang, X.-F.; Ma, J.-X.; Liu, W.-S. <i>Inorg. Chem.</i> <b>2014</b> , <i>53</i> , 5922. [Co(H <sub>2</sub> O) <sub>6</sub> ][CoDyC <sub>12</sub> H <sub>12</sub> O <sub>15</sub> ]·6H <sub>2</sub> O                                                                                                                                                           |
| LASJEX   | 2.085 Å | Rui, W.; Yuchen, Y.; Xin, D.; Zhaohui, Z. <i>Yingyong Huaxue</i> <b>2016</b> , <i>33</i> , 70.<br>[Co(H <sub>2</sub> O) <sub>6</sub> ][CoC <sub>8</sub> H <sub>13</sub> N <sub>2</sub> O <sub>7</sub> ]·2H <sub>2</sub> O                                                                                                                                      |
| MAZGAV   | 2.085 Å | De Munno, G.; Medaglia, M.; Armentano, D.; Anastassopoulou, J.; Theophanides, T. <i>J. Chem. Soc., Dalton Trans.</i> <b>2000</b> , 1625. [Co(H <sub>2</sub> O) <sub>6</sub> ](ClO <sub>4</sub> ) <sub>2</sub> ·6C <sub>5</sub> H <sub>7</sub> N <sub>3</sub> O·H <sub>2</sub> O                                                                                |
| PUMDIM   | 2.085 Å | Zhao, J.; Liu, B.; Wu, Y.-P.; Bai, L.; Zhang, J.; Li, D.-S. <i>CrystEngComm</i> <b>2015</b> , <i>17</i> , 7034.<br>H <sub>3</sub> O[Co(H <sub>2</sub> O) <sub>6</sub> ][Co(OC <sub>17</sub> H <sub>9</sub> O <sub>12</sub> ) <sub>3</sub> ]·0.5H <sub>2</sub> O                                                                                                |
| WACZOQ   | 2.085 Å | Jian-Xin Pan; Guo-Yu Yang; Yan-Qiong Sun <i>Acta Crystallogr., Sect. E</i> <b>2003</b> , <i>59</i> , m286.<br>[Co(H <sub>2</sub> O) <sub>6</sub> ](C <sub>4</sub> H <sub>12</sub> N <sub>2</sub> )(SO <sub>4</sub> ) <sub>2</sub>                                                                                                                              |
| WIZGIW   | 2.085 Å | Li, W.-W.; Zhang, Z.-T. <i>Acta Crystallogr., Sect. C</i> <b>2008</b> , <i>64</i> , m176. [Co(H <sub>2</sub> O) <sub>6</sub> ](C <sub>16</sub> H <sub>11</sub> O <sub>7</sub> S) <sub>2</sub> ·4H <sub>2</sub> O                                                                                                                                               |
| WUTGOH01 | 2.085 Å | Hidaoui, S.; Hamdi, N.; Akouibaa, M.; Benali-Cherif, R.; Vaclav, E.; Dusek, M.; Lachkar, M.; El Bali, B. <i>J. Mol. Struct.</i> <b>2022</b> , <i>1265</i> , 133296. [Co(H <sub>2</sub> O) <sub>6</sub> ](C <sub>4</sub> H <sub>12</sub> N <sub>2</sub> )(HPO <sub>4</sub> ) <sub>2</sub>                                                                       |
| XUYJIL   | 2.085 Å | Chen, Y.; Li, C.-H.; Wang, C.-F.; Wu, D.; Zuo, J.-L.; You, X.-Z. <i>Sci. Chin, Ser. B</i> <b>2009</b> , <i>52</i> , 1596.<br>[Co(H <sub>2</sub> O) <sub>6</sub> ][Co(OCHN(CH <sub>3</sub> ) <sub>2</sub> ) <sub>2</sub> (C <sub>11</sub> H <sub>6</sub> O <sub>4</sub> S <sub>6</sub> ) <sub>2</sub> ]·(CH <sub>3</sub> ) <sub>2</sub> NCHO·CH <sub>3</sub> OH |
| YAJVIQ   | 2.085 Å | Wang, Q.-Y.; He, Y.; Zhang, Z.-T. <i>Hecheng Huaxue</i> <b>2010</b> , <i>18</i> , 31. [Co(H <sub>2</sub> O) <sub>6</sub> ](C <sub>17</sub> H <sub>3</sub> O <sub>7</sub> S) <sub>2</sub> ·8H <sub>2</sub> O                                                                                                                                                    |
| 710009   | 2.086 Å | Euler, H.; Barbier, B.; Meents, A.; Kirfel, A. <i>Z. Kristallogr. - New Cryst. Struc.</i> <b>2009</b> , <i>224</i> , 355.<br>Tl <sub>2</sub> [Co(H <sub>2</sub> O) <sub>6</sub> ](SeO <sub>4</sub> ) <sub>2</sub>                                                                                                                                              |
| DIJREU   | 2.086 Å | Jakonen, M.; Hirva, P.; Nivajarvi, T.; Kallinen, M.; Haukka, M. <i>Eur. J. Inorg. Chem.</i> <b>2007</b> , 3497.<br>[Co(H <sub>2</sub> O) <sub>6</sub> ][RuCl <sub>3</sub> (CO) <sub>3</sub> ] <sub>2</sub> ·2H <sub>2</sub> O                                                                                                                                  |
| JAYGUP   | 2.086 Å | Mrad, M. L.; Ben Nasr, C.; Rzaigui, M. <i>E.-Jour. Chem.</i> <b>2010</b> , <i>7</i> , 887. [Co(H <sub>2</sub> O) <sub>6</sub> ](H <sub>3</sub> N(CH <sub>2</sub> ) <sub>3</sub> NH <sub>3</sub> )(NO) <sub>4</sub>                                                                                                                                             |
| QAXFAX   | 2.086 Å | Potgieter, H.; Purcell, W.; Visser, H. G.; Niclos-Gutierrez, J. <i>Polyhedron</i> <b>2005</b> , <i>24</i> , 1968.<br>[Co(H <sub>2</sub> O) <sub>6</sub> ][CoC <sub>14</sub> H <sub>18</sub> N <sub>2</sub> O <sub>12</sub> ] <sub>2</sub> ·2H <sub>2</sub> O                                                                                                   |
| SOVBOV   | 2.086 Å | Wang, J.; Morra, N. A.; Zhao, H.; Gorman, J. S. T.; Lynch, V.; McDonald, R.; Reichwein, J. F.; Pagenkopf, B. L. <i>Can. J. Chem.</i> <b>2009</b> , <i>87</i> , 328. [Co(H <sub>2</sub> O) <sub>6</sub> ][Co(C <sub>21</sub> H <sub>22</sub> NO <sub>3</sub> ) <sub>3</sub> ] <sub>2</sub> ·C <sub>6</sub> H <sub>6</sub> ·(CH <sub>3</sub> ) <sub>2</sub> CO   |
| 380476   | 2.087 Å | Zimmermann, L. W.; Schleid, T. Z. <i>Anorg. Allg. Chem.</i> <b>2010</b> , <i>636</i> , 2067. [Co(H <sub>2</sub> O) <sub>6</sub> ]B <sub>10</sub> H <sub>10</sub> ·2H <sub>2</sub> O                                                                                                                                                                            |
| AQURIO   | 2.087 Å | Huang, L.-F.; Ji, C.-C.; Lu, Z.-Z.; Yao, X.-Q.; Hu, J.-S.; Zheng, H.-G. <i>Dalton Trans.</i> <b>2011</b> , <i>40</i> , 3183.<br>[Co(H <sub>2</sub> O) <sub>6</sub> ][CoZn <sub>2</sub> C <sub>18</sub> H <sub>16</sub> O <sub>18</sub> ]·3H <sub>2</sub> O                                                                                                     |
| CALDAW   | 2.087 Å | Falvello, I. R.; Forcen-Vazquez, E.; Mayoral, I.; Tomas, M.; Palacio, F. <i>Acta Crystallogr., Sect. C</i> <b>2011</b> , <i>67</i> , m359. Cs <sub>2</sub> [Co(H <sub>2</sub> O) <sub>6</sub> ][CoC <sub>24</sub> H <sub>32</sub> O <sub>36</sub> ]·12H <sub>2</sub> O                                                                                         |

|          |         |                                                                                                                                                                                                                                                                                                                                                  |
|----------|---------|--------------------------------------------------------------------------------------------------------------------------------------------------------------------------------------------------------------------------------------------------------------------------------------------------------------------------------------------------|
| CIVCOB   | 2.087 Å | Shi, J.; Wang, Y.-C.; Wang, Q.-Y.; Zhang, Z.-T. <i>Inorg. Chm. Acta</i> <b>2014</b> , <i>409</i> , 259.<br>[Co(H <sub>2</sub> O) <sub>6</sub> ](C <sub>17</sub> H <sub>12</sub> BrO <sub>9</sub> S) <sub>2</sub> ·2H <sub>2</sub> O                                                                                                              |
| CUBXED   | 2.087 Å | Yang, L.-L.; Dang, Z.-H.; Xu, L. <i>Chin. J. Struct. Chem.</i> <b>2009</b> , <i>28</i> , 493.<br>[Co(H <sub>2</sub> O) <sub>6</sub> ][Co(C <sub>13</sub> H <sub>9</sub> NO <sub>2</sub> ) <sub>2</sub> ·2.25H <sub>2</sub> O                                                                                                                     |
| HIKLEU   | 2.087 Å | Saha, S.; Kottalanka, R. K. Panda, T. K.; Harms, K.; Dehnen, S.; Nayek, H. P. <i>J. Organometal. Chem.</i> <b>2013</b> , <i>745</i> , 329. [Co(H <sub>2</sub> O) <sub>6</sub> ](ClO <sub>4</sub> ) <sub>2</sub> ·2C <sub>6</sub> H <sub>12</sub> N <sub>4</sub> ·2H <sub>2</sub> O                                                               |
| LERVUB   | 2.087 Å | Mirzaei, M.; Eshtiagh-Hosseini, H.; Zarghami, S.; Karrabi, Z.; Saeedi, M.; Mague, J. T. <i>Acta Crystallogr., Sect. E</i> <b>2013</b> , <i>69</i> , m128. [Co(H <sub>2</sub> O) <sub>6</sub> ](C <sub>5</sub> H <sub>8</sub> N <sub>3</sub> ) <sub>2</sub> (SO <sub>4</sub> ) <sub>2</sub> ·2H <sub>2</sub> O                                    |
| QEQTEM   | 2.087 Å | Downer, S. M.; Squattrito, P. J.; Bestaoui, N.; Clearfield, A. <i>J. Chem. Cryst.</i> <b>2006</b> , <i>36</i> , 487.<br>[Co(H <sub>2</sub> O) <sub>6</sub> ](C <sub>10</sub> H <sub>8</sub> NO <sub>3</sub> S) <sub>2</sub> ·6H <sub>2</sub> O                                                                                                   |
| ECEPEH   | 2.087 Å | Nathan, L. C.; Mai, T. D. <i>J. Chem. Cryst.</i> <b>2000</b> , <i>30</i> , 509.<br>[Na <sub>4</sub> (H <sub>2</sub> O) <sub>18</sub> ][Co(H <sub>2</sub> O) <sub>6</sub> ][CoC <sub>14</sub> H <sub>6</sub> N <sub>2</sub> O <sub>8</sub> ][CoNa <sub>2</sub> C <sub>28</sub> H <sub>24</sub> N <sub>4</sub> O <sub>22</sub> ]·4H <sub>2</sub> O |
| HISLUS   | 2.087 Å | Shen, L.; Li, W.-X.; Xia, Q.-J.; Yang, J.; Liu, Y.; Ji, C.; Wu, C.-Y.; Zhai, Y.-S.; Yang, G.-W.; Li, Q.-Y. <i>J. Chem. Cryst.</i> <b>2013</b> , <i>43</i> , 585. [Co(H <sub>2</sub> O) <sub>6</sub> ][CoC <sub>13</sub> H <sub>10</sub> ClN <sub>2</sub> O <sub>5</sub> ] <sub>2</sub> ·2H <sub>2</sub> O                                        |
| NIWDUT   | 2.087 Å | Yan, X.; Liu, Y.; Li, J.-M.; Yan, H.-Q.; Zheng, Z.-B.; Si, S.-F. <i>Huaxue Xuebao</i> <b>2006</b> , <i>64</i> , 935.<br>[Co(H <sub>2</sub> O) <sub>6</sub> ](C <sub>14</sub> H <sub>11</sub> O <sub>7</sub> S) <sub>2</sub> ·6H <sub>2</sub> O                                                                                                   |
| OLOLIK   | 2.087 Å | Li-Jun Song; Jie Zhang; Zi-Rong Tang; Wen-Guo Wang; Zhan-Feng Ju <i>Acta Crystallogr., Sect. E</i> <b>2003</b> , <i>59</i> , m867. [Co(H <sub>2</sub> O) <sub>6</sub> ][Co <sub>2</sub> C <sub>18</sub> H <sub>28</sub> N <sub>4</sub> O <sub>14</sub> ] <sub>2</sub> ·4H <sub>2</sub> O                                                         |
| PIWKUD   | 2.087 Å | Zimmermann, L. W.; Schleid, T. <i>Z. Krist. Cryst. Mater.</i> <b>2013</b> , <i>228</i> , 558. [Co(H <sub>2</sub> O) <sub>6</sub> ]B <sub>10</sub> H <sub>102</sub> ·2H <sub>2</sub> O                                                                                                                                                            |
| SEVTIX   | 2.087 Å | Zhao-Peng Deng; Shan Gao; Peng-Gang Chen <i>Acta Crystallogr., Sect. E</i> <b>2007</b> , <i>63</i> , m296.<br>[Co(H <sub>2</sub> O) <sub>6</sub> ](C <sub>10</sub> H <sub>9</sub> O <sub>5</sub> ) <sub>2</sub> ·3H <sub>2</sub> O                                                                                                               |
| UNAGEV01 | 2.087 Å | Liu; Q.; Yu, K.-B. CCDC deposition number, 256354, <b>2006</b> .<br>[Co(H <sub>2</sub> O) <sub>6</sub> ](OOC(CH) <sub>2</sub> COO)·2C <sub>6</sub> H <sub>12</sub> N <sub>4</sub> ·2H <sub>2</sub> O                                                                                                                                             |
| VAWXAS02 | 2.087 Å | Zeller, M.; Chema, A. R.; Szalay, P. S.; Hunter, A. D. <i>J. Chem. Cryst.</i> <b>2005</b> , <i>35</i> , 433.<br>[Co(H <sub>2</sub> O) <sub>6</sub> ][CoC <sub>10</sub> H <sub>10</sub> O <sub>12</sub> ]·7.7H <sub>2</sub> O                                                                                                                     |
| YADTUU   | 2.087 Å | Wang, H.; Gao, S.; Ng, S. W. <i>Acta Crystallogr., Sect. E</i> <b>2011</b> , <i>67</i> , m1521.<br>[Co(H <sub>2</sub> O) <sub>6</sub> ][CoC <sub>8</sub> H <sub>8</sub> O <sub>8</sub> S <sub>2</sub> ]·2H <sub>2</sub> O                                                                                                                        |
| 70447    | 2.088 Å | Mamdouh, A.-A.; Ibrahim, A. B. M.; Reyad, N. E.-H. A.; Elsayed, Tarek R.; Cordeiro Santos, I.; Paulo, A.; Mahfouz, R. M. <i>J. Cluster. Sci.</i> <b>2023</b> , <i>34</i> , 1535-1546. (NH <sub>4</sub> ) <sub>2</sub> [Co(H <sub>2</sub> O) <sub>6</sub> ] <sub>2</sub> V <sub>10</sub> O <sub>28</sub> ·4H <sub>2</sub> O                       |
| AQCOAM02 | 2.088 Å | Afanasiev, P.; Chouzier, S.; Czeri, T.; Pilet, G.; Pichon, C.; Roy, M.; Vrinat, M. <i>Inorg. Chem.</i> <b>2008</b> , <i>47</i> , 2303. [Co(H <sub>2</sub> O) <sub>6</sub> ](NO <sub>3</sub> ) <sub>2</sub> ·2C <sub>6</sub> H <sub>12</sub> N <sub>4</sub> ·4H <sub>2</sub> O                                                                    |
| BAKNEI   | 2.088 Å | Colak, A. T.; Pamuk, G.; Yesilel, O. Z.; Yilmaz, F.; Buyukgungor, O. <i>J. Chem. Cryst.</i> <b>2012</b> , <i>42</i> , 76.<br>[Co(H <sub>2</sub> O) <sub>6</sub> ][CoC <sub>15</sub> H <sub>15</sub> N <sub>4</sub> O <sub>8</sub> ] <sub>2</sub> ·13H <sub>2</sub> O                                                                             |

|        |         |                                                                                                                                                                                                                                                                                                                                                                                                                                                                                                                                                                    |
|--------|---------|--------------------------------------------------------------------------------------------------------------------------------------------------------------------------------------------------------------------------------------------------------------------------------------------------------------------------------------------------------------------------------------------------------------------------------------------------------------------------------------------------------------------------------------------------------------------|
| BECREH | 2.088 Å | Fu; R.-B.; Wu; X.-T.; Hu; S.-M.; Zhang; J.-J.; Fu, Z.-Y.; Du, W.-X.; <i>Polyhedron</i> <b>2003</b> , <i>22</i> , 2739.<br>[Co(H <sub>2</sub> O) <sub>6</sub> ](HO <sub>3</sub> P(CH <sub>2</sub> ) <sub>4</sub> PO <sub>3</sub> H)·2H <sub>2</sub> O                                                                                                                                                                                                                                                                                                               |
| DIJSEV | 2.088 Å | Jakonen, M.; Hirva, P.; Nivajarvi, T.; Kallinen, M.; Haukka, M. <i>Eur. J. Inorg. Chem.</i> <b>2007</b> , 3497.<br>[Co(H <sub>2</sub> O) <sub>6</sub> ][OsCl <sub>3</sub> (CO) <sub>3</sub> ] <sub>2</sub> ·2H <sub>2</sub> O                                                                                                                                                                                                                                                                                                                                      |
| DOTRAI | 2.088 Å | Hosseini-Hashemi, Z.; Mirzaei, M.; Jafari, A.; Hosseinpour, P.; Yousefi, M.; Frontera, A.; Dashtbayaz, M. L.; Shamsipur, M.; Ardalani, M. <i>RSC Adv.</i> <b>2019</b> , <i>9</i> , 25382. [Co(H <sub>2</sub> O) <sub>6</sub> ][CoC <sub>14</sub> H <sub>10</sub> N <sub>2</sub> O <sub>12</sub> ]·2H <sub>2</sub> O                                                                                                                                                                                                                                                |
| FAKKEJ | 2.088 Å | Lv, Y.-K.; Jiang, Z.-G.; Gan, L.-H.; Liu, M.-X.; Feng, Y.-L. <i>CrystEngComm</i> <b>2012</b> , <i>14</i> , 314.<br>[Co(H <sub>2</sub> O) <sub>6</sub> ](C <sub>6</sub> H <sub>12</sub> N <sub>4</sub> ) <sub>2</sub> [H <sub>2</sub> W <sub>10</sub> O <sub>28</sub> ]·6H <sub>2</sub> O                                                                                                                                                                                                                                                                           |
| HTBZCO | 2.088 Å | Ottersen, T.; Warner, L. G.; Seff, K. <i>Acta Crystallogr., Sect. B</i> <b>1974</b> , <i>30</i> , 1188.                                                                                                                                                                                                                                                                                                                                                                                                                                                            |
| JEYMUW | 2.088 Å | Mateescu, A.; Gabriel, C.; Raptis, R. G.; Baran, P.; Salifoglou, A. <i>Inorg. Chim. Acta</i> <b>2007</b> , <i>360</i> , 638.<br>(NH <sub>4</sub> ) <sub>4</sub> [Co(H <sub>2</sub> O) <sub>6</sub> ][CoC <sub>4</sub> H <sub>10</sub> NO <sub>10</sub> P <sub>2</sub> ] <sub>2</sub> ·2[Co <sub>2</sub> C <sub>4</sub> H <sub>23</sub> N <sub>3</sub> O <sub>13</sub> P <sub>2</sub> ]·1.36C <sub>2</sub> H <sub>5</sub> OH·4H <sub>2</sub> O                                                                                                                      |
| LIWJEH | 2.088 Å | Morzyk-Ociepa, B. <i>J. Mol. Struct.</i> <b>2007</b> , <i>846</i> , 74. [Co(H <sub>2</sub> O) <sub>6</sub> ](C <sub>8</sub> H <sub>5</sub> N <sub>2</sub> O <sub>2</sub> ) <sub>2</sub> ·6H <sub>2</sub> O                                                                                                                                                                                                                                                                                                                                                         |
| NESFIB | 2.088 Å | Zhao-Peng Deng; Shan Gao; Ng, S. W. <i>Acta Crystallogr., Sect. E</i> <b>2006</b> , <i>62</i> , m3423.<br>[Co(H <sub>2</sub> O) <sub>6</sub> ](OOCC <sub>6</sub> H <sub>4</sub> CHO) <sub>2</sub> ·2H <sub>2</sub> O                                                                                                                                                                                                                                                                                                                                               |
| QUCPOV | 2.088 Å | Kammoun, O. ; Naili, H. ; Rekik, W. ; Bataille, T. <i>Inorg. Chim. Acta</i> <b>2015</b> , <i>434</i> , 209.<br>[Co(H <sub>2</sub> O) <sub>6</sub> ](C <sub>4</sub> H <sub>7</sub> N <sub>2</sub> ) <sub>2</sub> (SO <sub>4</sub> ) <sub>2</sub> ·2H <sub>2</sub> O                                                                                                                                                                                                                                                                                                 |
| UYIQUR | 2.088 Å | de Campos, N. R.; Simosono, C. A.; Rosa, I. M. L.; da Silva, R. M. R.; Doriguetto, A. C.; do Pim, W. D.; Simoes, T. R. G.; Valdo, A. K. S. M.; Martins, F. T.; Sarmiento, C. V.; Nunes, W. C.; Guedes, G. P.; Pedroso, E. F.; Pereira, C. L. M.; Stumpf, H. O.; Lloret, F.; Julve, M.; Marinho, M. V. <i>Dalton Trans.</i> <b>2021</b> , <i>50</i> , 10707. [Co(H <sub>2</sub> O) <sub>6</sub> ] <sub>2</sub> [Co <sub>2</sub> C <sub>30</sub> H <sub>18</sub> N <sub>6</sub> O <sub>18</sub> ] <sub>2</sub> ·(CH <sub>3</sub> ) <sub>2</sub> SO·4H <sub>2</sub> O |
| WUTGOH | 2.088 Å | Craven, E.; Abu-Shandi, K.; Janiak, C. Z. <i>Anorg. Allg. Chem.</i> <b>2003</b> , <i>629</i> , 195.<br>[Co(H <sub>2</sub> O) <sub>6</sub> ](C <sub>4</sub> H <sub>12</sub> N <sub>2</sub> )(HPO <sub>4</sub> ) <sub>2</sub>                                                                                                                                                                                                                                                                                                                                        |
| WADBEJ | 2.088 Å | Li; X. ; Bi; W. ; Daqiang; Y. ; Youfu; Z.; Cao, R. <i>Acta Crystallogr., Sect.</i><br>[Co(H <sub>2</sub> O) <sub>6</sub> ]Cl <sub>2</sub> ·2C <sub>6</sub> H <sub>12</sub> N <sub>4</sub> ·4H <sub>2</sub> O                                                                                                                                                                                                                                                                                                                                                       |
| XILNOW | 2.088 Å | Du, J.-M. ; Li, Q. ; Li, W. ; Lin, H.-M. ; Guo, G.-C. <i>Acta Crystallogr., Sect. E</i> <b>2007</b> , <i>62</i> , m3423.<br>[Co(H <sub>2</sub> O) <sub>6</sub> ]( <i>p</i> -O <sub>3</sub> SC <sub>6</sub> H <sub>4</sub> OH) <sub>2</sub> ·2H <sub>2</sub> O                                                                                                                                                                                                                                                                                                      |
| 27799  | 2.089 Å | Maury, F.; Gleizes, A. <i>Comptes Rendus Hebdomadaires des Seances de l'Academie des Sciences, Serie C, Sciences Chimiques</i> <b>1980</b> , <i>290</i> , 105. [Co(H <sub>2</sub> O) <sub>6</sub> ][SnF <sub>3</sub> ] <sub>2</sub>                                                                                                                                                                                                                                                                                                                                |
| 59856  | 2.089 Å | Li, X.-H. ; Li, Z.-G. <i>Acta Crystallogr., Sect. E</i> <b>2004</b> , <i>60</i> , i114. (NH <sub>4</sub> ) <sub>2</sub> [Co(H <sub>2</sub> O) <sub>6</sub> ](SO <sub>4</sub> ) <sub>2</sub>                                                                                                                                                                                                                                                                                                                                                                        |
| 195091 | 2.089 Å | Held, P. <i>Acta Crystallogr., Sect. E</i> <b>2015</b> , <i>71</i> , m77. ((CH <sub>3</sub> ) <sub>2</sub> NH <sub>2</sub> ) <sub>2</sub> [Co(H <sub>2</sub> O) <sub>6</sub> ](SO <sub>4</sub> ) <sub>2</sub> ·2H <sub>2</sub> O                                                                                                                                                                                                                                                                                                                                   |
| 710005 | 2.089 Å | Euler, H.; Barbier, B.; Meents, A.; Kirfel, A. <i>Z. Kristallogr. - New Cryst. Struc.</i> <b>2009</b> , <i>224</i> , 355.<br>Tl <sub>2</sub> [Co(H <sub>2</sub> O) <sub>6</sub> ](SO <sub>4</sub> ) <sub>2</sub>                                                                                                                                                                                                                                                                                                                                                   |

|          |         |                                                                                                                                                                                                                                                                                                                                                  |
|----------|---------|--------------------------------------------------------------------------------------------------------------------------------------------------------------------------------------------------------------------------------------------------------------------------------------------------------------------------------------------------|
| AMIWOK   | 2.089 Å | Zhang, Z.-M.; Zangana, K. H.; Kostopoulos, A. K.; Tong, M.-L.; Winpenny, R. E. P. <i>Dalton Trans.</i> <b>2016</b> , 45, 9041. [Co(H <sub>2</sub> O) <sub>6</sub> ](CH <sub>3</sub> ) <sub>3</sub> NH <sub>4</sub> [GdC <sub>132</sub> H <sub>282</sub> N <sub>12</sub> O <sub>90</sub> P <sub>12</sub> ]·8CH <sub>3</sub> CN·18H <sub>2</sub> O |
| DUDYAE   | 2.089 Å | Held, P. <i>Acta Crystallogr., Sect. E</i> <b>2015</b> , 71, m3423. ((CH <sub>3</sub> ) <sub>2</sub> NH <sub>2</sub> ) <sub>2</sub> [Co(H <sub>2</sub> O) <sub>6</sub> ](SO <sub>4</sub> ) <sub>2</sub> ·2H <sub>2</sub> O                                                                                                                       |
| EKOYEK   | 2.089 Å | Bednarchuk, T. J.; Kinzhybalov, V.; Pietraszko, A. <i>Acta Crystallogr., Sect. C</i> <b>2016</b> , 72, 432. [Co(H <sub>2</sub> O) <sub>6</sub> ] <sub>3</sub> (2-C <sub>5</sub> H <sub>4</sub> NNH <sub>2</sub> ) <sub>2</sub> (SO <sub>4</sub> ) <sub>4</sub> ·2H <sub>2</sub> O                                                                |
| IWOXAU   | 2.089 Å | Wang, Q.-Y.; Jiao, H.; Zhu, H.-Y. <i>Rengong Jingti Xuebao</i> <b>2010</b> , 39, 823. [Co(H <sub>2</sub> O) <sub>6</sub> ](C <sub>18</sub> H <sub>15</sub> O <sub>7</sub> S) <sub>2</sub> ·4H <sub>2</sub> O                                                                                                                                     |
| MAZVIT01 | 2.089 Å | Tepavitcharova, S.; Rabadjieva, D.; Havlicek, D.; Nemecek, I.; Vojtisek, P.; Plocek, J.; Koleva Z. <i>J. Mol. Struct.</i> <b>2012</b> , 1018, 113. [Co(H <sub>2</sub> O) <sub>6</sub> ][Co(H <sub>2</sub> O) <sub>4</sub> (OCOCHNH <sub>3</sub> ) <sub>2</sub> ](SO <sub>4</sub> ) <sub>2</sub>                                                  |
| TAFYEG   | 2.089 Å | Zang, H.-Y.; Tan, K.; Guan, W.; Li, S.-L.; Yang, G.-S.; Shao, K.-Z.; Yan, L.-K.; Su, Z.-M. <i>CrystEngComm</i> <b>2010</b> , 12, 3684. [Co(H <sub>2</sub> O) <sub>6</sub> ][CoMo <sub>8</sub> C <sub>36</sub> H <sub>40</sub> N <sub>12</sub> O <sub>28</sub> ]·[Mo <sub>8</sub> O <sub>26</sub> ]·6H <sub>2</sub> O                             |
| TAQXUF   | 2.089 Å | Paz, F. A. A.; Fa-Nian Shi; Mafra, L.; Makal, A.; Wozniak, K.; Trindade, T.; Klinowski, J.; Rocha, J. <i>Acta Crystallogr., Sect. E</i> <b>2005</b> , 61, m1628. [Co(H <sub>2</sub> O) <sub>6</sub> ][CoV <sub>2</sub> C <sub>14</sub> H <sub>20</sub> N <sub>4</sub> O <sub>18</sub> P <sub>2</sub> ]·2H <sub>2</sub> O                         |
| VOPL0D   | 2.089 Å | Garczarek, P.; Janczak, J.; Duczmal, M.; Zon, J. <i>Polyhedron</i> <b>2014</b> , 81, 132. [Co(H <sub>2</sub> O) <sub>6</sub> ] <sub>3</sub> (C <sub>12</sub> H <sub>18</sub> O <sub>9</sub> P <sub>3</sub> ) <sub>2</sub> ·11H <sub>2</sub> O                                                                                                    |
| ZAHVUD   | 2.089 Å | Uvarova, M. A.; Nefedov, S. E. <i>Koord. Khim.</i> <b>2020</b> , 46, 608. [Co(H <sub>2</sub> O) <sub>6</sub> ](CF <sub>3</sub> COO) <sub>2</sub> ·C <sub>4</sub> H <sub>8</sub> O <sub>2</sub>                                                                                                                                                   |
| ZATXIE   | 2.089 Å | Qin, L.; Chen, H.-Z.; Wang, Y.-Q.; Ye, T.-Q.; Zheng, H. G. <i>Inorg. Chem. Commun.</i> <b>2017</b> , 85, 89. [Co(H <sub>2</sub> O) <sub>6</sub> ][Co <sub>3</sub> C <sub>22</sub> H <sub>32</sub> O <sub>26</sub> ]·3H <sub>2</sub> O                                                                                                            |
| 916      | 2.090 Å | Vicat, J.; Qui, D. T.; Aleonard, S. <i>Acta Crystallogr. Sect. B</i> <b>1977</b> , 33, 1180. (NH <sub>4</sub> ) <sub>2</sub> [Co(H <sub>2</sub> O) <sub>6</sub> ][BeF <sub>4</sub> ]                                                                                                                                                             |
| DIJROE   | 2.090 Å | Jakonen, M.; Hirva, P.; Nivajarvi, T.; Kallinen, M.; Haukka, M. <i>Eur. J. Inorg. Chem.</i> <b>2007</b> , 3497. [Co(H <sub>2</sub> O) <sub>6</sub> ][RuI <sub>3</sub> (CO) <sub>3</sub> ] <sub>2</sub> ·2H <sub>2</sub> O                                                                                                                        |
| MAZVIT   | 2.090 Å | Fleck, M.; Bohaty, L. <i>Acta Crystallogr., Sect. C</i> <b>2006</b> , 62, m22. [Co(H <sub>2</sub> O) <sub>6</sub> ][Co(H <sub>2</sub> O) <sub>4</sub> (OCOCHNH <sub>3</sub> ) <sub>2</sub> ](SO <sub>4</sub> ) <sub>2</sub>                                                                                                                      |
| MAZVIT03 | 2.090 Å | Oguey, S.; Jacquier, Y.; Neels, A.; Stoeckli-Evans, H. CCDC deposition number 936396, <b>2013</b> . [Co(H <sub>2</sub> O) <sub>6</sub> ][Co(H <sub>2</sub> O) <sub>4</sub> (OCOCHNH <sub>3</sub> ) <sub>2</sub> ](SO <sub>4</sub> ) <sub>2</sub>                                                                                                 |
| NIQGID   | 2.090 Å | In, Y.; Hayashi, C.; Ishida, T. <i>Inorg. Chim. Acta</i> <b>1997</b> , 260, 111. [Co(H <sub>2</sub> O) <sub>6</sub> ](C <sub>8</sub> H <sub>9</sub> NO <sub>7</sub> P) <sub>2</sub> ·4H <sub>2</sub> O                                                                                                                                           |
| ULAXAI   | 2.090 Å | Golovnev, N. N.; Molokeevev, M. S.; Lesnikov, M. K.; Atuchin, V. V. <i>Chem. Phys. Lett.</i> <b>2016</b> , 653, 54. [Co(H <sub>2</sub> O) <sub>6</sub> ](C <sub>8</sub> H <sub>11</sub> N <sub>2</sub> O <sub>2</sub> S) <sub>2</sub> ·2H <sub>2</sub> O                                                                                         |
| VURWOW   | 2.090 Å | Naili, H.; Said, S. CCDC deposition number 1433263, <b>2015</b> . [Co(H <sub>2</sub> O) <sub>6</sub> ](C <sub>6</sub> H <sub>9</sub> N <sub>2</sub> ) <sub>2</sub> (SO <sub>4</sub> ) <sub>2</sub> ·2H <sub>2</sub> O                                                                                                                            |
| YAKLUT   | 2.090 Å | Xian, H.-D.; Liu, J.-F.; Zhao, G.-L. <i>Sci. Chin. Chem.</i> <b>2010</b> , 53, 2539. [Co(H <sub>2</sub> O) <sub>6</sub> ][Co(C <sub>12</sub> H <sub>8</sub> N <sub>2</sub> ) <sub>3</sub> ] <sub>2</sub> (C <sub>10</sub> H <sub>16</sub> O <sub>8</sub> ) <sub>3</sub> ·30H <sub>2</sub> O                                                      |
| YEJFUQ   | 2.090 Å | Zhang, W.-M.; Lu, Z.-M.; Li, W.; Chen, M.; Caom, D.-M. <i>Z. Kristallogr. – New Cryst Struct.</i> <b>2012</b> , 227, 311. [Co(H <sub>2</sub> O) <sub>6</sub> ][Co(H <sub>2</sub> O) <sub>2</sub> (C <sub>7</sub> H <sub>3</sub> NO <sub>4</sub> ) <sub>2</sub> ]·4H <sub>2</sub> O                                                               |

|          |         |                                                                                                                                                                                                                                                                                                                       |
|----------|---------|-----------------------------------------------------------------------------------------------------------------------------------------------------------------------------------------------------------------------------------------------------------------------------------------------------------------------|
| 66004    | 2.091 Å | Herdtweck, E.; Massa, W. <i>Z. Anorg. Allg. Chem.</i> <b>1989</b> , 579, 191. [Co(H <sub>2</sub> O) <sub>6</sub> ][AlF <sub>5</sub> (H <sub>2</sub> O)]                                                                                                                                                               |
| 84310    | 2.091 Å | Lorenzo-Luis, P. A.; Martin-Zarza, P.; Gili, P.; Saez-Puche, R.; Jimenez-Jimenez, J.; Rodriguez-Castellon, E.; Ruiz-Perez, C.; Gonzalez-Platas, J.; Solans, X. <i>Eur. J. Solid State Inorg. Chem.</i> <b>1997</b> , 34, 1259. [Co(H <sub>2</sub> O) <sub>6</sub> ] <sub>3</sub> [TeMo <sub>6</sub> O <sub>24</sub> ] |
| 99950    | 2.091 Å | Fleck, M.; Bohaty, L.; Tillmanns, E. <i>Solid State Sci.</i> <b>2004</b> , 6, 469. (C(NH <sub>2</sub> ) <sub>3</sub> ) <sub>2</sub> [Co(H <sub>2</sub> O) <sub>6</sub> ](SO <sub>4</sub> ) <sub>2</sub>                                                                                                               |
| AMAT0Z   | 2.091 Å | Bednarchuk, T. J.; Kinzhybalov, V.; Bednarchuk, O.; Pietraszko, A. <i>J. Mol. Struct.</i> <b>2016</b> , 1120, 138. [Co(H <sub>2</sub> O) <sub>6</sub> ](4-C <sub>5</sub> H <sub>4</sub> NNH <sub>2</sub> ) <sub>2</sub> (SO <sub>4</sub> ) <sub>2</sub>                                                               |
| COHDPH02 | 2.091 Å | Kariuki, B. M.; Jones, W. <i>Acta Crystallogr., Sect. C</i> <b>1993</b> , 49, 2100. [Co(H <sub>2</sub> O) <sub>6</sub> ]( <i>m</i> -C <sub>6</sub> H <sub>4</sub> COO(COOH)) <sub>2</sub>                                                                                                                             |
| COCXOI   | 2.091 Å | Zhang, S.-G.; Feng, Y.-L.; Wen, Y.-H. <i>Chin. J. Inorg. Chem.</i> <b>2008</b> , 24, 581. [Co(H <sub>2</sub> O) <sub>6</sub> ](C <sub>6</sub> H <sub>7</sub> N <sub>4</sub> O <sub>3</sub> S) <sub>2</sub>                                                                                                            |
| FEGRAO   | 2.091 Å | Zhao, G.; Yuan, F.; Li, H.; Liu, J. <i>J. Mater. Sci.</i> <b>2021</b> , 56, 6912. (C <sub>22</sub> H <sub>34</sub> N <sub>2</sub> )[Co(H <sub>2</sub> O) <sub>6</sub> ]( <i>p</i> -C <sub>6</sub> H <sub>4</sub> (COO) <sub>2</sub> ) <sub>2</sub> ·(CH <sub>3</sub> ) <sub>2</sub> NCHO·H <sub>2</sub> O             |
| HTBZCO   | 2.091 Å | Ottersen, T.; Warner, L. G.; Seff, K. <i>Acta Crystallogr. Sect. B</i> <b>1974</b> , 30, 1188. [Co(H <sub>2</sub> O) <sub>6</sub> ](C <sub>14</sub> H <sub>9</sub> O <sub>4</sub> S <sub>2</sub> ) <sub>2</sub> ·4CH <sub>3</sub> OH·6H <sub>2</sub> O                                                                |
| ININUP   | 2.091 Å | Liu, C.-B.; Wen, H.-L.; Gong, Y.-N.; Liu, X.-M.; Tan, S.-S. <i>Z. Anorg. Allg. Chem.</i> <b>2011</b> , 637, 122. [Co(H <sub>2</sub> O) <sub>6</sub> ][CoC <sub>24</sub> H <sub>24</sub> N <sub>2</sub> O <sub>16</sub> ]·2H <sub>2</sub> O                                                                            |
| MAZVIT02 | 2.091 Å | Smolin, Y. I.; Lapshin, A. E.; Pankova, G. A. <i>J. Mol. Struct.</i> <b>2012</b> , 1018, 113. [Co(H <sub>2</sub> O) <sub>6</sub> ][Co(H <sub>2</sub> O) <sub>4</sub> (OCOCHNH <sub>3</sub> ) <sub>2</sub> ](SO <sub>4</sub> ) <sub>2</sub>                                                                            |
| ONOSUG   | 2.091 Å | Wagner, C.; Merzweiler, K. <i>Z. Anorg. Allg. Chem.</i> <b>2010</b> , 636, 557. [Co(H <sub>2</sub> O) <sub>6</sub> ]( <i>p</i> -O <sub>3</sub> SC <sub>6</sub> H <sub>4</sub> COOH) <sub>2</sub>                                                                                                                      |
| UNAGEV   | 2.091 Å | Konar, S.; Zangrando, E.; Chaudhuri, N. R. <i>Inorg. Chim. Acta</i> <b>2003</b> , 355, 264. [Co(H <sub>2</sub> O) <sub>6</sub> ](OOC(CH) <sub>2</sub> COO)·2C <sub>6</sub> H <sub>12</sub> N <sub>4</sub> ·2H <sub>2</sub> O                                                                                          |
| WAJKUO   | 2.091 Å | Fleck, M.; Bohaty, L.; Tillmanns, E. <i>Solid State Sci.</i> <b>2004</b> , 6, 469. [Co(H <sub>2</sub> O) <sub>6</sub> ](C(NH <sub>2</sub> ) <sub>3</sub> ) <sub>2</sub> (SO <sub>4</sub> ) <sub>2</sub>                                                                                                               |
| WEXJIV   | 2.091 Å | Gu, J.-Z.; Cai, Y.; Qian, Z.-Y.; Wen, M.; Shi, Z.-F.; Lv, S.-D.; Kirillov, A. M. <i>Dalton Trans.</i> <b>2018</b> , 47, 7431. [Co(H <sub>2</sub> O) <sub>6</sub> ][Co <sub>2</sub> C <sub>60</sub> H <sub>48</sub> N <sub>8</sub> O <sub>22</sub> ]·8H <sub>2</sub> O                                                 |
| XIQGIP   | 2.091 Å | Poleti, D.; Rogan, J. <i>Acta Crystallogr., Sect. C</i> <b>2013</b> , 69, 841. Rb <sub>2</sub> [Co(H <sub>2</sub> O) <sub>6</sub> ](2-O <sub>2</sub> CC <sub>6</sub> H <sub>4</sub> COOH) <sub>4</sub> ·4H <sub>2</sub> O                                                                                             |
| XUXGUT   | 2.091 Å | Wu, J.; Pan, X.; Yao, L.; Wang, L.; Tang, N. <i>Supramol. Chem.</i> <b>2009</b> , 21, 707. [Co(H <sub>2</sub> O) <sub>6</sub> ](ClO <sub>4</sub> ) <sub>2</sub> ·2(C <sub>21</sub> H <sub>22</sub> O <sub>7</sub> )·2CH <sub>3</sub> CN                                                                               |
| ZASREQ   | 2.091 Å | Porai-Koshits, M. A.; Antsyshkina, A. S.; Shkol'nikova, L. M.; Sadikov, C. G.; Davidovich, R. L. <i>Koord. Khim.</i> <b>1995</b> , 21, 311. [Co(H <sub>2</sub> O) <sub>6</sub> ][BiC <sub>20</sub> H <sub>24</sub> N <sub>4</sub> O <sub>16</sub> ]·3H <sub>2</sub> O                                                 |
| ZERCIK   | 2.091 Å | Luo, S.-Y.; Wu, X.-L.; Hu, Q.-P.; Wang, J.-X.; Liu, C.-Z.; Sun, Y.-Y. <i>Zh. Strukt. Khim.</i> <b>2012</b> , 53, 935. [Co(H <sub>2</sub> O) <sub>6</sub> ] <sub>3</sub> [V <sub>10</sub> O <sub>28</sub> ]·2C <sub>8</sub> H <sub>18</sub> N <sub>2</sub> O <sub>6</sub> S <sub>2</sub> ·3H <sub>2</sub> O            |
| ZOYPOU   | 2.091 Å | Kumar, G.; Kumar, G.; Gupta, R. <i>Inorg. Chem.</i> <b>2015</b> , 54, 2603. [Co(H <sub>2</sub> O) <sub>6</sub> ][Co <sub>3</sub> C <sub>42</sub> H <sub>29</sub> N <sub>6</sub> O <sub>16</sub> ] <sub>2</sub> ·22H <sub>2</sub> O                                                                                    |



|          |         |                                                                                                                                                                                                                                                                                                                   |
|----------|---------|-------------------------------------------------------------------------------------------------------------------------------------------------------------------------------------------------------------------------------------------------------------------------------------------------------------------|
| 170042   | 2.092 Å | El Bali, B.; Essehli, R.; Capitelli, F.; Lachkar, M. <i>Acta Crystallogr. Sect. E</i> <b>2005</b> , <i>61</i> , i52.<br>NH <sub>4</sub> [Co(H <sub>2</sub> O) <sub>6</sub> ]PO <sub>4</sub>                                                                                                                       |
| 419316   | 2.092 Å | Lu Yaokang; Feng Yunlong <i>Chin. J. Chem.</i> <b>2009</b> , <i>25</i> , 447. Na <sub>2</sub> [Co(H <sub>2</sub> O) <sub>6</sub> ](SO <sub>4</sub> ) <sub>2</sub>                                                                                                                                                 |
| AFEXO    | 2.092 Å | Martsinko, E. E.; Minacheva, L. K.; Chebanenko, E. A.; Seifullina, I. I.; Sergienko, V. S.; Churakov, A. <i>V. Zh. Neorg. Khim.</i> <b>2013</b> , <i>58</i> , 588. [Co(H <sub>2</sub> O) <sub>6</sub> ][GeC <sub>12</sub> H <sub>10</sub> O <sub>14</sub> ]·4H <sub>2</sub> O                                     |
| CAGVOV03 | 2.092 Å | Li-Ya Wang; Yu Zhu; Chen-Xia Du; Huai-Bo Ma <i>J. Mol. Struct.</i> <b>2002</b> , <i>610</i> , 191. [Co(H <sub>2</sub> O) <sub>6</sub> ](C <sub>10</sub> H <sub>4</sub> O <sub>8</sub> )                                                                                                                           |
| FIYLAD   | 2.092 Å | Bazhina, E. S.; Gogoleva, N. V.; Aleksandrov, G. G.; Kiskin, M. A.; Efimov, N. N.; Bogomyakov, A. S.; Ugolkova, E. A.; Minin, V. V.; Sidorov, A. A.; Eremenko, I. L. <i>Chem. Sel.</i> <b>2018</b> , <i>3</i> , 13765.<br>[Co(H <sub>2</sub> O) <sub>6</sub> ][CuC <sub>12</sub> H <sub>14</sub> O <sub>9</sub> ] |
| GAWNAX   | 2.092 Å | Divekar, S. K.; Nagabhusan Achary, S.; Ajgaonkar, V. R. <i>Solid State Sci.</i> <b>2021</b> , <i>122</i> , 106768.<br>(CH <sub>3</sub> ) <sub>4</sub> N) <sub>2</sub> [Co(H <sub>2</sub> O) <sub>6</sub> ](SeO <sub>4</sub> ) <sub>2</sub> ·4H <sub>2</sub> O                                                     |
| QEQTAAH  | 2.092 Å | Furmanova, N. G.; Eremina, T. A.; Okhrimenko, T. M.; Kuznetsov, V. A. <i>Kristallografiya</i> <b>2000</b> , <i>45</i> , 842.<br>K <sub>2</sub> [Co(H <sub>2</sub> O) <sub>6</sub> ](I-COO-2-COOHC <sub>6</sub> H <sub>4</sub> ) <sub>4</sub> ·4H <sub>2</sub> O                                                   |
| RENRI    | 2.092 Å | Kumaresan, S. ; Ramadevi, P. ; Walsh, R. D. ; McAneny, A. ; Lake, C. H. <i>J. Chem. Sci.</i> <b>2006</b> , <i>118</i> , 243.<br>[Co(H <sub>2</sub> O) <sub>6</sub> ](C <sub>7</sub> H <sub>6</sub> NO <sub>3</sub> S) <sub>2</sub>                                                                                |
| SAYVEU   | 2.092 Å | Abdelhak, J. ; Cherni, S. N. ; Jouini, T. Z. <i>Kristallogr. - New Cryst. Struct.</i> <b>2005</b> , <i>220</i> , 183.<br>[Co(H <sub>2</sub> O) <sub>6</sub> ](C <sub>7</sub> H <sub>4</sub> O <sub>6</sub> S) <sub>2</sub> ·2H <sub>2</sub> O                                                                     |
| VAWXAS01 | 2.092 Å | Robl, C.; Hentschel, S. <i>Mater. Res. Bull.</i> <b>1991</b> , <i>26</i> , 1355. [Co(H <sub>2</sub> O) <sub>6</sub> ][CoC <sub>10</sub> H <sub>10</sub> O <sub>12</sub> ]·8H <sub>2</sub> O                                                                                                                       |
| 110303   | 2.093 Å | Galloway, K. W.; Parkin, A.; Harte, S. M.; Ferguson, A.; Murrie, M. <i>Cryst. Eng. Comm.</i> <b>2006</b> , <i>8</i> , 346.<br>((CH <sub>3</sub> ) <sub>4</sub> N) <sub>2</sub> [Co(H <sub>2</sub> O) <sub>6</sub> ](SO <sub>4</sub> ) <sub>2</sub> ·4H <sub>2</sub> O                                             |
| 170780   | 2.093 Å | Quarsal, R.; El Bali, B.; Lachkar, M.; Dusek, M.; Fejfarova, K. <i>Acta Crystallogr., Sect. E</i> <b>2005</b> , <i>61</i> , i168.<br>[Co(H <sub>2</sub> O) <sub>6</sub> ][Co(HPO <sub>3</sub> ) <sub>4</sub> ]                                                                                                    |
| DUJXAI   | 2.093 Å | Kang, W.; Huo, L.-H.; Gao, S.; W.Ng, S. W. <i>Acta Crystallogr., Sect. E</i> <b>2009</b> , <i>65</i> , m1503.<br>[Co(H <sub>2</sub> O) <sub>6</sub> ][CoC <sub>8</sub> H <sub>18</sub> N <sub>6</sub> O <sub>4</sub> ](SO <sub>4</sub> ) <sub>2</sub> ·2H <sub>2</sub> O                                          |
| EGUNEB   | 2.093 Å | Tang, S.-F.; Li, L.-J.; Lv, X.-X.; Wang, C.; Zhao, X.-B. <i>CrystEngComm</i> <b>2014</b> , <i>16</i> , 7043.<br>[Co(H <sub>2</sub> O) <sub>6</sub> ]C <sub>8</sub> H <sub>10</sub> O <sub>6</sub> P <sub>2</sub> ·2H <sub>2</sub> O                                                                               |
| FIVHUP   | 2.093 Å | Liang, Y.; Zhang, Z.-M.; Liu, Z.-J.; Zhang, Y.; Zhang, J.; Wang, E.-B. <i>CrystEngComm</i> <b>2014</b> , <i>16</i> , 1187.<br>[Co(H <sub>2</sub> O) <sub>6</sub> ] <sub>2</sub> [Co <sub>3</sub> V <sub>11</sub> C <sub>6</sub> H <sub>20</sub> N <sub>4</sub> O <sub>34</sub> ]·11H <sub>2</sub> O               |
| IDAPAF   | 2.093 Å | Galloway, K. W.; Parkin, A.; Harte, S. M.; Ferguson, A.; Murrie, M. <i>CrystEngComm</i> <b>2006</b> , <i>8</i> , 346.<br>((CH <sub>3</sub> ) <sub>4</sub> ) <sub>2</sub> [Co(H <sub>2</sub> O) <sub>6</sub> ](SO <sub>4</sub> ) <sub>2</sub> ·4H <sub>2</sub> O                                                   |
| IDEBOK   | 2.093 Å | Han, L.-J.; Yang, S.-P.; Fu, L.-L.; Gao, H.-L. <i>Acta Crystallogr., Sect. E</i> <b>2011</b> , <i>67</i> , m1733.<br>[Co(H <sub>2</sub> O) <sub>6</sub> ](C <sub>9</sub> H <sub>7</sub> O <sub>4</sub> ) <sub>2</sub> ·2H <sub>2</sub> O                                                                          |
| KUYNEY   | 2.093 Å | Tang, P.; Ma, D.; Chen, Z.-Q. <i>Acta Crystallogr., Sect. E</i> <b>2010</b> , <i>66</i> , m1322. [Co(H <sub>2</sub> O) <sub>6</sub> ]C <sub>16</sub> H <sub>12</sub> O <sub>6</sub> ·H <sub>2</sub> O                                                                                                             |

|                  |                    |                                                                                                                                                                                                                                                                                                                      |
|------------------|--------------------|----------------------------------------------------------------------------------------------------------------------------------------------------------------------------------------------------------------------------------------------------------------------------------------------------------------------|
| NAMNIZ           | 2.093 Å            | Ya-Juan Zhao; Xin-Hua Li; Shun Wang <i>Acta Crystallogr., Sect. E</i> <b>2005</b> , <i>61</i> , m671.<br>C <sub>6</sub> H <sub>14</sub> N <sub>2</sub> [Co(H <sub>2</sub> O) <sub>6</sub> ](SO <sub>4</sub> ) <sub>2</sub>                                                                                           |
| NIHSOM01         | 2.093 Å            | Genther, D. J.; Squattrito, P. J.; Kirschbaum, K.; Pinkerton, A. A. <i>Acta Crystallogr. Sect. E</i> <b>2007</b> , <i>63</i> , m2260. [Co(H <sub>2</sub> O) <sub>6</sub> ](C <sub>10</sub> H <sub>8</sub> NO <sub>6</sub> S <sub>2</sub> ) <sub>2</sub> ·4H <sub>2</sub> O                                           |
| QOQYEB           | 2.093 Å            | Qian, X.-B.; Sun, W.-W.; Zhang, J.-Y.; Gao, E.-Q. <i>Wuji Huaxue Xuebao</i> <b>2009</b> , <i>25</i> , 171.<br>[Co(H <sub>2</sub> O) <sub>6</sub> ]Co(H <sub>2</sub> O) <sub>4</sub> (C <sub>12</sub> H <sub>5</sub> O <sub>7</sub> S <sub>2</sub> ) <sub>2</sub> ·4H <sub>2</sub> O                                  |
| UVOQUT           | 2.093 Å            | Hassan, D. B.; Rekik, W.; Roza, A. O.; Mefteh, F. B.; Roisnel, T.; Bataille, T.; Naili, H. <i>Polyhedron</i> <b>2016</b> , <i>119</i> , 238. [Co(H <sub>2</sub> O) <sub>6</sub> ](C <sub>4</sub> H <sub>12</sub> N <sub>2</sub> ) <sub>3</sub> (NO <sub>3</sub> ) <sub>8</sub> ·4H <sub>2</sub> O                    |
| WEMYOD           | 2.093 Å            | Aloui, Z.; Abid, S.; Rzaigui, M. <i>Phosphorus, Sulfur, Silicon, Relat. Elem.</i> <b>2006</b> , <i>181</i> , 1725.<br>[Co(H <sub>2</sub> O) <sub>6</sub> ](C <sub>12</sub> H <sub>19</sub> N <sub>2</sub> ) <sub>2</sub> (P <sub>4</sub> O <sub>12</sub> ) <sub>2</sub>                                              |
| WUCYOI           | 2.093 Å            | Branco, L.; Costa, J.; Delgado, R.; Drew, M. G. B.; Felix, V.; Goodfellow, B. J. <i>J. Chem. Soc., Dalton Trans.</i> <b>2002</b> , 3539. [Co(H <sub>2</sub> O) <sub>6</sub> ][CoC <sub>20</sub> H <sub>30</sub> N <sub>6</sub> ] <sub>2</sub> (SO <sub>4</sub> ) <sub>4</sub> ·2CH <sub>3</sub> OH·8H <sub>2</sub> O |
| YEYYAC<br>11440  | 2.093 Å<br>2.094 Å | Podlaha, J.; Podlahova, J.; Stepnicka, P. <i>Polyhedron</i> <b>1994</b> , <i>13</i> , 2847. [Co(H <sub>2</sub> O) <sub>6</sub> ][Co <sub>2</sub> C <sub>18</sub> H <sub>24</sub> O <sub>12</sub> P <sub>2</sub> ] <sub>2</sub> ·6H <sub>2</sub> O                                                                    |
| 14347            | 2.094 Å            | Ayer, G. B.; Klepov, V. V.; Smith, M. D.; Zur Loye H.-C. <i>Inorg. Chem.</i> <b>58</b> , <b>2019</b> , 13049.<br>K <sub>2</sub> [Co(H <sub>2</sub> O) <sub>6</sub> ][Hf <sub>2</sub> F <sub>12</sub> ]                                                                                                               |
| 51641            | 2.094 Å            | Montgomery, H.; Chastain, R. V.; Natt, J. J.; Witkowska, A. M.; Lingafelter, E. C. <i>Acta Crystallogr. Sect. B</i> <b>1967</b> , <i>22</i> , 775. (NH <sub>4</sub> ) <sub>2</sub> [Co(H <sub>2</sub> O) <sub>6</sub> ](SO <sub>4</sub> ) <sub>2</sub>                                                               |
| 51643            | 2.094 Å            | Kockelmann, W.; Schäfer, W.; Kirfel, A.; Klapper, H.; Euler, H. <i>Mater. Sci. Forum</i> <b>2001</b> , <i>378</i> , 274.<br>Cs <sub>2</sub> [Co(H <sub>2</sub> O) <sub>6</sub> ][Hf <sub>2</sub> (SO <sub>4</sub> ) <sub>2</sub> ]                                                                                   |
| 409494           | 2.094 Å            | Kockelmann, W.; Schäfer, W.; Kirfel, A.; Klapper, H.; Euler, H. <i>Mater. Sci. Forum</i> <b>2001</b> , <i>378</i> , 274.<br>K <sub>2</sub> [Co(H <sub>2</sub> O) <sub>6</sub> ](SO <sub>4</sub> ) <sub>2</sub>                                                                                                       |
| BEVSIH<br>OBUPOT | 2.094 Å<br>2.094 Å | Euler, H.; Barbier, B.; Klumpp, S.; Kirfel, A. <i>Z. Kristallogr. - New Cryst. Struct.</i> <b>2000</b> , <i>215</i> , 473.<br>Rb <sub>2</sub> [Co(H <sub>2</sub> O) <sub>6</sub> ](SO <sub>4</sub> ) <sub>2</sub>                                                                                                    |
| OVIWEW           | 2.094 Å            | Liu, J. <i>Dyes Pigm.</i> <b>2018</b> , <i>154</i> , 92. [Co(H <sub>2</sub> O) <sub>6</sub> ](C <sub>12</sub> H <sub>14</sub> N <sub>2</sub> )(p-C <sub>6</sub> H <sub>4</sub> (COO) <sub>2</sub> ) <sub>2</sub> ·4H <sub>2</sub> O                                                                                  |
| PIGRED           | 2.094 Å            | Felder, J.; Yeon, J.; Smith, M.; zur Loye, H.-C. <i>Inorg. Chem. Front.</i> <b>2017</b> , <i>4</i> , 368.<br>[Co(H <sub>2</sub> O) <sub>6</sub> ][UF <sub>5</sub> ] <sub>2</sub> ·2H <sub>2</sub> O                                                                                                                  |
| PIWFOQ           | 2.094 Å            | Alsobrook, A. N.; Hauser, B. G.; Hupp, J. T.; Alekseev, E. V.; Depmeier, W.; Albrecht-Schmitt, T. E. <i>Cryst. Growth Des.</i> <b>2011</b> , <i>11</i> , 1385.                                                                                                                                                       |
|                  |                    | Indrani, M.; Kumaresan, S.; Ramasubramanian, M.; Soriano-Garcia, M. <i>Anal. Sci.: X-Ray Struct. Anal. Online</i> <b>2007</b> , <i>23</i> , x127. [Co(H <sub>2</sub> O) <sub>6</sub> ](C <sub>8</sub> H <sub>8</sub> NO <sub>3</sub> S) <sub>2</sub>                                                                 |
|                  |                    | Chavez, F. A.; Olmstead, M. M.; Mascharak, P. K. <i>Inorg. Chem.</i> <b>1997</b> , <i>36</i> , 6323.<br>[Co(H <sub>2</sub> O) <sub>6</sub> ][CoC <sub>34</sub> H <sub>34</sub> N <sub>14</sub> O <sub>4</sub> ] <sub>2</sub> ·10.8H <sub>2</sub> O                                                                   |

|          |         |                                                                                                                                                                                                                                                                                                          |
|----------|---------|----------------------------------------------------------------------------------------------------------------------------------------------------------------------------------------------------------------------------------------------------------------------------------------------------------|
| VUHQIA   | 2.094 Å | Wang, H.; Chu, W.; Yin, F.; Chen, B. CCDC deposition number 1406609, <b>2015</b> .<br>[Co(H <sub>2</sub> O) <sub>6</sub> ](C <sub>3</sub> H <sub>5</sub> N <sub>2</sub> ) <sub>2</sub> [Co(H <sub>2</sub> O) <sub>4</sub> (C <sub>9</sub> H <sub>3</sub> O <sub>6</sub> ) <sub>2</sub> ]                 |
| ZADSOP   | 2.094 Å | An, H.; Wang, L.; Hu, Y.; Xu, T.; Hou, Y. <i>Inorg. Chem.</i> <b>2016</b> , <i>55</i> , 144.<br>[Co(H <sub>2</sub> O) <sub>6</sub> ](C <sub>8</sub> H <sub>8</sub> NO <sub>2</sub> ) <sub>4</sub> [Co <sub>2</sub> Mo <sub>10</sub> H <sub>4</sub> O <sub>38</sub> ]·5H <sub>2</sub> O                   |
| 1934     | 2.095 Å | Vicat, J.; Qui, D. T.; Filhol, A.; Roudaut, E.; Thomas, M.; Aleonard, S. <i>Acta Crystallogr. Sect. B</i> <b>1975</b> , <i>31</i> , 1895. (NH <sub>4</sub> ) <sub>2</sub> [Co(H <sub>2</sub> O) <sub>6</sub> ][BeF <sub>4</sub> ]                                                                        |
| 29829    | 2.095 Å | Liu, Y.; Deng, J.-X.; Pan, C.-Y. <i>J. Cluster Sci.</i> <b>2021</b> , <i>32</i> , 469. [Co(H <sub>2</sub> O) <sub>6</sub> ](NO <sub>3</sub> ) <sub>2</sub> ·<br>[Co(B <sub>3</sub> O <sub>3</sub> (OH) <sub>4</sub> ) <sub>2</sub> (H <sub>2</sub> O) <sub>4</sub> ]·2H <sub>2</sub> O                   |
| 68733    | 2.095 Å | Blackburn, A. C.; Gallucci, J. H.; Gerkin, R. E. <i>Acta Crystallogr., Sect. B</i> <b>1990</b> , <i>46</i> , 712.<br>[Co(H <sub>2</sub> O) <sub>6</sub> ](BrO <sub>3</sub> ) <sub>2</sub>                                                                                                                |
| 92162    | 2.095 Å | Ishaque Khan, M.; Tabussum, S.; Zheng, C. <i>Synthesis and Reactivity in Inorganic and Metal-Organic Chemistry</i> <b>2000</b> , <i>30</i> , 1773. (H <sub>3</sub> O) <sub>2</sub> [Co(H <sub>2</sub> O) <sub>6</sub> ] <sub>2</sub> [V <sub>10</sub> O <sub>28</sub> H <sub>6</sub> ]·4H <sub>2</sub> O |
| 409648   | 2.095 Å | Fleck, M.; Kolitsch, U. <i>Z. Kristallogr. - New Cryst. Struc.</i> <b>2003</b> , <i>218</i> , 265. (NH <sub>4</sub> ) <sub>2</sub> [Co(H <sub>2</sub> O) <sub>6</sub> ](SeO <sub>4</sub> ) <sub>2</sub>                                                                                                  |
| AGOJUB   | 2.095 Å | Lee, U.; Joo, H.-C.; Cho, M.-A. <i>Acta Crystallogr., Sect. E</i> <b>2002</b> , <i>58</i> , m599.<br>K <sub>4</sub> [Co(H <sub>2</sub> O) <sub>6</sub> ][CoC <sub>10</sub> H <sub>12</sub> N <sub>2</sub> O <sub>8</sub> ][Mo <sub>8</sub> O <sub>26</sub> ]·6H <sub>2</sub> O                           |
| AGOKOZ   | 2.095 Å | Oleshkevich, E.; Romero, I.; Teixidor, F.; Vinas, C. <i>Dalton Trans.</i> <b>2018</b> , <i>47</i> , 14785.<br>[Co(H <sub>2</sub> O) <sub>6</sub> ](C <sub>2</sub> B <sub>12</sub> H <sub>2</sub> PO <sub>2</sub> ) <sub>2</sub>                                                                          |
| CAWTEZ   | 2.095 Å | Riley, P. E.; Pecoraro, V. L.; Carrano, C. J.; Raymond, K. N. <i>Inorg. Chem.</i> <b>1983</b> , <i>22</i> , 3096.<br>[Co(H <sub>2</sub> O) <sub>6</sub> ][CoC <sub>18</sub> H <sub>16</sub> N <sub>2</sub> O <sub>6</sub> ]·4H <sub>2</sub> O                                                            |
| DEYVOU   | 2.095 Å | Chen, Z.; An, H.; Zhang, H.; Hu, Y. <i>CrystEngComm</i> <b>2013</b> , <i>15</i> , 4711.<br>[Co(H <sub>2</sub> O) <sub>6</sub> ][Mo <sub>8</sub> C <sub>12</sub> H <sub>30</sub> N <sub>4</sub> O <sub>30</sub> ]·4H <sub>2</sub> O                                                                       |
| DUJXAI01 | 2.095 Å | Boonmak, J.; Nakano, M.; Chaichit, N.; Pakawatchai, C.; Youngme, S. <i>Dalton Trans</i> <b>2010</b> , <i>39</i> , 8161.<br>[Co(H <sub>2</sub> O) <sub>6</sub> ][CoC <sub>8</sub> H <sub>18</sub> N <sub>6</sub> O <sub>4</sub> ](SO <sub>4</sub> ) <sub>2</sub> ·2H <sub>2</sub> O                       |
| DURBIC   | 2.095 Å | Al-Dajani, M. T. M.; Wahab, H. A.; Mohamed, N.; Goh, J. H.; Fun, H.-K. <i>Acta Crystallogr., Sect. E</i> <b>2010</b> , <i>66</i> , m917. [Co(H <sub>2</sub> O) <sub>6</sub> ](C <sub>5</sub> H <sub>8</sub> N <sub>3</sub> ) <sub>2</sub> (SO <sub>4</sub> ) <sub>2</sub> ·2H <sub>2</sub> O             |
| ENSUCO   | 2.095 Å | Pavelcik, F.; Soldanova, J.; Majer, J. <i>Collect. Czech. Chem. Commun.</i> <b>1980</b> , <i>45</i> , 1766.<br>[Co(H <sub>2</sub> O) <sub>6</sub> ][Co <sub>2</sub> C <sub>20</sub> H <sub>24</sub> N <sub>4</sub> O <sub>16</sub> ]·8H <sub>2</sub> O                                                   |
| FIWQOR   | 2.095 Å | Karanovic, L.; Poleti, D.; Bogdanovic, G. A.; Spasojevic-De Bire, A. <i>Acta Crystallogr., Sect. C</i> <b>1999</b> , <i>55</i> , 911. Na <sub>2</sub> [Co(H <sub>2</sub> O) <sub>6</sub> ](C <sub>10</sub> H <sub>4</sub> O <sub>8</sub> ) <sub>2</sub> ·4H <sub>2</sub> O                               |
| FOQLOM   | 2.095 Å | Yue-Qing Zheng; Jian-Li Lin; Ai-Ya Pan <i>Z. Allg. Anorg. Allg. Chem.</i> <b>2000</b> , <i>626</i> , 1718.                                                                                                                                                                                               |
| IDAFUQ   | 2.095 Å | Hajlaoui, F.; Naili, H.; Yahyaoui, S.; Turnbull, M. M.; Mhiri, T.; Bataille, T. <i>Dalton Trans.</i> <b>2011</b> , <i>40</i> , 11613. [Co(H <sub>2</sub> O) <sub>6</sub> ](C <sub>5</sub> H <sub>14</sub> N <sub>2</sub> ) <sub>2</sub> (SO <sub>4</sub> ) <sub>2</sub>                                  |

|        |         |                                                                                                                                                                                                                                                                                                  |
|--------|---------|--------------------------------------------------------------------------------------------------------------------------------------------------------------------------------------------------------------------------------------------------------------------------------------------------|
| NETQOU | 2.095 Å | Liu, B.; Li, X.-M.; Zhou, S.; Wang, Q.-W.; Li, C.-B. <i>Wuji Huaxue Xuebao</i> <b>2012</b> , 28, 1019.<br>[Co(H <sub>2</sub> O) <sub>6</sub> ][CoC <sub>12</sub> H <sub>20</sub> N <sub>4</sub> O <sub>6</sub> ](C <sub>6</sub> H <sub>2</sub> O <sub>4</sub> S) <sub>2</sub> ·2H <sub>2</sub> O |
| OYOSUR | 2.095 Å | Duan, X.; Meng, Q.; Su, Y.; Li, Y.; Duan, C.; Ren, X.; Lu, C. <i>Chem. Eur. J.</i> <b>2011</b> , 17, 9936.<br>[Co(H <sub>2</sub> O) <sub>6</sub> ][CoC <sub>24</sub> H <sub>36</sub> N <sub>4</sub> O <sub>8</sub> ][CoC <sub>34</sub> H <sub>20</sub> O <sub>18</sub> ]·12H <sub>2</sub> O      |
| QANFUH | 2.095 Å | Li; X.-H.; Xiao; H.-P.; Yang, S.-Z. <i>Acta Crystallogr., Sect. C</i> <b>2005</b> , 61, m112.<br>[Co(H <sub>2</sub> O) <sub>6</sub> ][CoC <sub>36</sub> H <sub>48</sub> N <sub>6</sub> O <sub>8</sub> ](SO <sub>4</sub> ) <sub>4</sub> ·8H <sub>2</sub> O                                        |
| RAXMEJ | 2.095 Å | Bourne, S. A.; Moitsheki, L. J. <i>CrystEngComm.</i> <b>2005</b> , 7, 674. [Co(H <sub>2</sub> O) <sub>6</sub> ]Br <sub>2</sub> ·2C <sub>10</sub> H <sub>8</sub> N <sub>2</sub> O <sub>2</sub> ·2H <sub>2</sub> O                                                                                 |
| TELBAN | 2.095 Å | Xiao-Ming Chen; Hui-An Chen; Bo-Mu Wu; Mak, T. C. W. <i>Acta Crystallogr., Sect. C</i> <b>1996</b> , 52, 2693.<br>[Co(H <sub>2</sub> O) <sub>6</sub> ][CoC <sub>11</sub> H <sub>14</sub> N <sub>2</sub> O <sub>9</sub> ] <sub>2</sub>                                                            |
| VAQDOI | 2.095 Å | Hajlaoui, F.; Naili, H.; Yahyaoui, S.; Norquist, A. J.; Mhiri, T.; Bataille, T. <i>J. Organometal. Chem.</i> <b>2012</b> , 700, 110. [Co(H <sub>2</sub> O) <sub>6</sub> ](C <sub>5</sub> H <sub>14</sub> N <sub>2</sub> )(SO <sub>4</sub> ) <sub>2</sub>                                         |
| ZISHIV | 2.095 Å | Ying, L. CCDC deposition number 1886919, <b>2018</b> . [Co(H <sub>2</sub> O) <sub>6</sub> ](NO <sub>3</sub> ) <sub>2</sub> ·[CoC <sub>16</sub> B <sub>6</sub> O <sub>18</sub> ]·2H <sub>2</sub> O                                                                                                |
| ZOPDEP | 2.095 Å | Kammoun, O.; Naili, H.; Rekek, W.; Bataille, T.; Mhiri, T. <i>New J. Chem.</i> <b>2014</b> 39, 2682.<br>[Co(H <sub>2</sub> O) <sub>6</sub> ](C <sub>7</sub> H <sub>7</sub> N <sub>2</sub> ) <sub>2</sub> (SO <sub>4</sub> ) <sub>2</sub> ·4H <sub>2</sub> O                                      |
| 50582  | 2.096 Å | Kirfel, A.; Klapper, H.; Schaefer, W.; Schwabenlaender, F. <i>Z. Kristallogr.</i> <b>1998</b> , 213, 456.<br>K <sub>2</sub> [Co(H <sub>2</sub> O) <sub>6</sub> ](SO <sub>4</sub> ) <sub>2</sub>                                                                                                  |
| 409720 | 2.096 Å | Euler, H.; Barbier, B.; Meents, A.; Kirfel, A. <i>Z. Kristallogr. - New Cryst. Struc.</i> <b>2003</b> , 218, 265.<br>Rb <sub>2</sub> [Co(H <sub>2</sub> O) <sub>6</sub> ](SeO <sub>4</sub> ) <sub>2</sub>                                                                                        |
| 409748 | 2.096 Å | Euler, H.; Barbier, B.; Meents, A.; Kirfel, A. <i>Z. Kristallogr. - New Cryst. Struc.</i> <b>2003</b> , 218, 405.<br>Cs <sub>2</sub> [Co(H <sub>2</sub> O) <sub>6</sub> ](SeO <sub>4</sub> ) <sub>2</sub>                                                                                        |
| 422597 | 2.096 Å | Kaziev, G. Z.; Oreshikina, A. V.; Stepnova, A. F.; Holguin Quinones, S.; Stash, A. I.; Morales Sanchez, L. A. <i>Koord. Khim.</i> <b>2011</b> , 37, 768. (NH <sub>4</sub> ) <sub>2</sub> [Co(H <sub>2</sub> O) <sub>6</sub> ][HV <sub>10</sub> O <sub>28</sub> ]·8H <sub>2</sub> O               |
| BECTUA | 2.096 Å | Zhong, K.-L.; Qian, M.-Y. <i>Acta Crystallogr., Sect. C</i> <b>2012</b> , 68, m265. [Co(H <sub>2</sub> O) <sub>6</sub> ][CoC <sub>10</sub> H <sub>12</sub> N <sub>2</sub> O <sub>10</sub> S <sub>2</sub> ]·<br>[CoC <sub>10</sub> H <sub>14</sub> N <sub>2</sub> O <sub>7</sub> S]               |
| KERNEB | 2.096 Å | Gao; J.-S.; Li; B.-Y.; Hou; G.-F.; Zhang; Y.-M.; Yan, P.-F. <i>Acta Crystallogr., Sect. E</i> <b>2006</b> , 62, m3029.<br>[Co(H <sub>2</sub> O) <sub>6</sub> ]C <sub>8</sub> H <sub>6</sub> NO <sub>5</sub> ·5H <sub>2</sub> O                                                                   |
| KOLHOK | 2.096 Å | Diaz-Gallifa, P.; Fabelo, O.; Pasan, J.; Canadillas-Delgado, L.; Lloret, F. L.; Julve, M.; Ruiz-Perez, C. <i>Inorg. Chem.</i> <b>2014</b> , 53, 6299. [Co(H <sub>2</sub> O) <sub>6</sub> ][EuC <sub>10</sub> H <sub>6</sub> O <sub>10</sub> ] <sub>2</sub> ·10H <sub>2</sub> O                   |
| NENDOA | 2.096 Å | Ning-Yi Jiang; Song-Lin Li <i>Jiegou Huaxue</i> <b>2006</b> , 25, 957. [Co(H <sub>2</sub> O) <sub>6</sub> ] <sub>2</sub> (ClO <sub>4</sub> ) <sub>2</sub> ·2C <sub>15</sub> H <sub>14</sub> N <sub>2</sub> O <sub>4</sub> ·2H <sub>2</sub> O                                                     |
| OHINOL | 2.096 Å | Tugba, A. CCDC deposition number 1566694, <b>2020</b> . [Co(H <sub>2</sub> O) <sub>6</sub> ][Co(H <sub>2</sub> O) <sub>4</sub> (C <sub>6</sub> H <sub>6</sub> N <sub>2</sub> O) <sub>2</sub> ](SO <sub>4</sub> ) <sub>2</sub> ·2H <sub>2</sub> O                                                 |
| TANMIH | 2.096 Å | Mao, N.; Zhang, B.; Yu, F.; Chen, X.; Zhuang, G.-L.; Wang, Z.; Ouyang, Z.; Zhang, T.; Li, B. <i>Dalton Trans.</i> <b>2017</b> , 46, 4786. [Co(H <sub>2</sub> O) <sub>6</sub> ][Co(H <sub>2</sub> O) <sub>2</sub> (C <sub>13</sub> H <sub>7</sub> N <sub>2</sub> O <sub>6</sub> ) <sub>2</sub> ]  |

|          |         |                                                                                                                                                                                                                                                                                                                                                                                                                                                        |
|----------|---------|--------------------------------------------------------------------------------------------------------------------------------------------------------------------------------------------------------------------------------------------------------------------------------------------------------------------------------------------------------------------------------------------------------------------------------------------------------|
| VAQCUN   | 2.096 Å | Hajlaoui, F.; Naili, H.; Yahyaoui, S.; Norquist, A. J.; Mhiri, T.; Bataille, T. <i>J. Organometal. Chem.</i> <b>2012</b> , <i>700</i> , 110. [Co(H <sub>2</sub> O) <sub>6</sub> ](C <sub>5</sub> H <sub>14</sub> N <sub>2</sub> )(SO <sub>4</sub> ) <sub>2</sub>                                                                                                                                                                                       |
| VAQCUN01 | 2.096 Å | Chen, L.-Z.; Huang, D.-D.; Pan, Q.-J.; Wang, F.-M. <i>Chin. Chem. Lett.</i> <b>2014</b> , <i>25</i> , 967. [Co(H <sub>2</sub> O) <sub>6</sub> ](C <sub>5</sub> H <sub>14</sub> N <sub>2</sub> )(SO <sub>4</sub> ) <sub>2</sub>                                                                                                                                                                                                                         |
| VATHIJ   | 2.096 Å | Kumar, D.; Kapoor, I. P. S.; Singh, G.; Goel, N.; Singh, U. P. <i>Thermal Anal. Calorimetry</i> <b>2012</b> , <i>107</i> , 325. [Co(H <sub>2</sub> O) <sub>6</sub> ][Co(C <sub>10</sub> H <sub>8</sub> N <sub>2</sub> ) <sub>3</sub> ] <sub>2</sub> (NO <sub>3</sub> ) <sub>8</sub> ·7H <sub>2</sub> O                                                                                                                                                 |
| VATHIJ01 | 2.096 Å | Henling, L. M.; Marsh, R. E. <i>Acta Crystallogr., Sect. C</i> <b>2014</b> , <i>70</i> , 834. [Co(H <sub>2</sub> O) <sub>6</sub> ][Co(C <sub>10</sub> H <sub>8</sub> N <sub>2</sub> ) <sub>3</sub> ] <sub>2</sub> (NO <sub>3</sub> ) <sub>8</sub> ·7H <sub>2</sub> O                                                                                                                                                                                   |
| VOCDAS   | 2.096 Å | Zhang Hualin; Li Peiyi; Wang Boyi; Wu Jianhua; Zheng Peiju <i>Polyhedron</i> <b>1990</b> , <i>9</i> , 2873. [Co(H <sub>2</sub> O) <sub>6</sub> ][CoC <sub>12</sub> H <sub>10</sub> NO <sub>7</sub> ] <sub>2</sub> ·8H <sub>2</sub> O                                                                                                                                                                                                                   |
| WOQZUX   | 2.096 Å | Matovic, Z. D.; Ristic, B.; Joksovic, M.; Trifunovic, S. R.; Pelosi, G.; Ianelli, S.; Ponticelli, G. <i>Transition Met. Chem.</i> <b>2000</b> , <i>25</i> , 720. [Co(H <sub>2</sub> O) <sub>6</sub> ][Cu <sub>7</sub> H <sub>6</sub> N <sub>2</sub> O <sub>6</sub> ] <sub>2</sub> ·2H <sub>2</sub> O                                                                                                                                                   |
| WURQUX   | 2.096 Å | Palmucci, J.; Mahmudov, K. T.; Fatima M.; Guedes da Silva, C.; Martins, L. M. D. R. S.; Marchetti, F.; Pettinari, C.; Pombeiro, A. J. L. <i>RSC Adv.</i> <b>2015</b> , <i>5</i> , 84142. [Co(H <sub>2</sub> O) <sub>6</sub> ][CoC <sub>20</sub> H <sub>12</sub> N <sub>8</sub> O <sub>8</sub> ] <sub>2</sub> ·8H <sub>2</sub> O                                                                                                                        |
| WUYHUT   | 2.096 Å | Lin-Ping Zhang; Hai-Bin Song; Quan-Min Wang; Mak, T. C. W. <i>Polyhedron</i> <b>2003</b> , <i>22</i> , 811. [Co(H <sub>2</sub> O) <sub>6</sub> ]Cl <sub>2</sub> ·(C <sub>22</sub> H <sub>20</sub> N <sub>2</sub> O <sub>6</sub> )·2H <sub>2</sub> O                                                                                                                                                                                                    |
| XACMOG   | 2.096 Å | Wang, X.; Liu, D.; Lin, H.; Liu, G.; Wang, X.; Le, M.; Rong, X. <i>CrystEngComm</i> <b>2016</b> , <i>18</i> , 888. [Co(H <sub>2</sub> O) <sub>6</sub> ][CoMo <sub>4</sub> C <sub>24</sub> H <sub>19</sub> N <sub>6</sub> O <sub>20</sub> ] <sub>2</sub> ·10H <sub>2</sub> O                                                                                                                                                                            |
| YOBWUI   | 2.096 Å | Kolotilov, S. V.; Schollmeyer, D.; Thompson, L. K.; Golub, V.; Addison, A. W.; Pavlishchuk, V. V. <i>Dalton Trans.</i> <b>2008</b> , 3007. [Co(H <sub>2</sub> O) <sub>6</sub> ][Cu <sub>3</sub> C <sub>18</sub> H <sub>14</sub> N <sub>12</sub> O <sub>9</sub> ] <sub>2</sub> ·4H <sub>2</sub> O                                                                                                                                                       |
| 409740   | 2.097 Å | Euler, H.; Barbier, B.; Meents, A.; Kirfel, A. <i>Z. Kristallogr. - New Cryst. Struc.</i> <b>2003</b> , <i>218</i> , 409. Cs <sub>2</sub> [Co(H <sub>2</sub> O) <sub>6</sub> ](SO <sub>4</sub> ) <sub>2</sub>                                                                                                                                                                                                                                          |
| 161176   | 2.097 Å | Abrahams, B. F.; Haywood, M. G.; Robson, R. <i>Crystal Growth Design</i> <b>2008</b> , <i>8</i> , 1288. [Na <sub>4</sub> (H <sub>2</sub> O) <sub>17</sub> ][Co(H <sub>2</sub> O) <sub>6</sub> ] <sub>2</sub> [(Co(H <sub>2</sub> O) <sub>2</sub> ) <sub>1.5</sub> Cu(SO <sub>3</sub> ) <sub>4</sub> ] <sub>2</sub>                                                                                                                                     |
| CUCKIV   | 2.097 Å | Zhou, Z.; He, X.; Zhao, Y.; Shao, M.; Zhu, S. <i>Dalton Trans.</i> <b>2009</b> , 2802. [Co(H <sub>2</sub> O) <sub>6</sub> ][Co <sub>3</sub> C <sub>28</sub> H <sub>12</sub> N <sub>4</sub> O <sub>18</sub> ] <sub>2</sub> ·10H <sub>2</sub> O                                                                                                                                                                                                          |
| DUBYIJ   | 2.097 Å | Liang, W.-L.; Yu, Q.; Zhang, X.-Q.; Qin, J.-K.; Liang, H. <i>Acta Crystallogr., Sect. E</i> <b>2007</b> , <i>63</i> , m1006. [Co(H <sub>2</sub> O) <sub>6</sub> ](C <sub>9</sub> H <sub>10</sub> N <sub>8</sub> O <sub>4</sub> S <sub>2</sub> )                                                                                                                                                                                                        |
| EJULEC   | 2.097 Å | Zhang, Z.-M.; Duan, X.; Yao, S.; Wang, Z.; Lin, Z.; Li, Y.-G.; Long, L.-S.; Wang, E.-B.; Lin, W. <i>Chem. Sci.</i> <b>2016</b> , <i>7</i> , 4220. (NH <sub>4</sub> ) <sub>8</sub> (C <sub>6</sub> H <sub>13</sub> N <sub>4</sub> ) <sub>5</sub> [Co(H <sub>2</sub> O) <sub>6</sub> ] <sub>2</sub> [Co <sub>4</sub> Sb <sub>9</sub> W <sub>24</sub> C <sub>18</sub> H <sub>42</sub> N <sub>12</sub> O <sub>100</sub> ] <sub>2</sub> ·29H <sub>2</sub> O |
| IDERIV   | 2.097 Å | Liu, J. <i>Chem Sel.</i> <b>2018</b> , <i>3</i> , 8356. [Co(H <sub>2</sub> O) <sub>6</sub> ](C <sub>14</sub> H <sub>18</sub> N <sub>2</sub> )(p-C <sub>6</sub> H <sub>4</sub> (COO) <sub>2</sub> ) <sub>2</sub> ·4H <sub>2</sub> O                                                                                                                                                                                                                     |
| KOLHIE   | 2.097 Å | Diaz-Gallifa, P.; Fabelo, O.; Pasan, J.; Canadillas-Delgado, L.; Lloret, F. L.; Julve, M.; Ruiz-Perez, C. <i>Inorg. Chem.</i> <b>2014</b> , <i>53</i> , 6299. [Co(H <sub>2</sub> O) <sub>6</sub> ][NdC <sub>10</sub> H <sub>6</sub> O <sub>10</sub> ] <sub>2</sub> ·10H <sub>2</sub> O                                                                                                                                                                 |

|          |         |                                                                                                                                                                                                                                                                                                                                                                                                     |
|----------|---------|-----------------------------------------------------------------------------------------------------------------------------------------------------------------------------------------------------------------------------------------------------------------------------------------------------------------------------------------------------------------------------------------------------|
| PACJUZ   | 2.097 Å | Guo-Li Zheng; Jian-Fang Ma; Jin Yang <i>J. Chem. Res.</i> <b>2004</b> , 387. [Co(H <sub>2</sub> O) <sub>6</sub> ][CoC <sub>20</sub> H <sub>60</sub> N <sub>4</sub> O <sub>28</sub> P <sub>8</sub> ]·12H <sub>2</sub> O                                                                                                                                                                              |
| PEVYAT   | 2.097 Å | Santoso, S. P.; Ismadji, S.; Angkawijaya, A. E.; Soetaredjo, F. E.; Go, A. W.; Ju, Y. H. <i>J. Mol. Liq.</i> <b>2016</b> , 221, 617. [Co(H <sub>2</sub> O) <sub>6</sub> ][2,6-(OH) <sub>2</sub> C <sub>4</sub> H <sub>3</sub> COOH] <sub>2</sub> ·2H <sub>2</sub> O                                                                                                                                 |
| TEVQIV   | 2.097 Å | Ai-E Shi; Shuang Zhang; Bai-Yan Li; Yan-Jun Hou; Guang-Feng Hou <i>Acta Crystallogr., Sect. E</i> <b>2009</b> , 65, m1006. [Co(H <sub>2</sub> O) <sub>6</sub> ](4-SCH <sub>2</sub> COOH-C <sub>6</sub> H <sub>4</sub> NO <sub>2</sub> ) <sub>2</sub>                                                                                                                                                |
| YADTII   | 2.097 Å | Zhang, L.-W.; Gao, S.; Ng, S. W. <i>Acta Crystallogr., Sect. E</i> <b>2011</b> , 67, m1519. [Co(H <sub>2</sub> O) <sub>6</sub> ](C <sub>10</sub> H <sub>13</sub> NO <sub>3</sub> ) <sub>2</sub> ·2H <sub>2</sub> O                                                                                                                                                                                  |
| 50583    | 2.098 Å | Kirfel, A.; Klapper, H.; Schaefer, W.; Schwabenlaender, F. <i>Z. Kristallogr.</i> <b>1998</b> , 213, 456. K <sub>2</sub> [Co(H <sub>2</sub> O) <sub>6</sub> ](SO <sub>4</sub> ) <sub>2</sub>                                                                                                                                                                                                        |
| GIMPEZ   | 2.098 Å | Kovalchukova, O. V.; Stash, A. I.; Nguen, D. D.; Strashnova, S. B.; Belsky, V. K. <i>Koord. Khim.</i> <b>2013</b> , 39, 136. [Co(H <sub>2</sub> O) <sub>6</sub> ](C <sub>5</sub> HN <sub>2</sub> O <sub>6</sub> ) <sub>2</sub> ·2H <sub>2</sub> O                                                                                                                                                   |
| HULMAC   | 2.098 Å | Rodriguez-Martin, Y.; Sanchiz, J.; Ruiz-Perez, C.; Lloret, F.; Julve, M. <i>Cryst. Eng. Comm.</i> <b>2002</b> , 4, 631. [Co(H <sub>2</sub> O) <sub>6</sub> ][Cu(H <sub>2</sub> O) <sub>2</sub> (C <sub>2</sub> O <sub>4</sub> ) <sub>2</sub> ]                                                                                                                                                      |
| ZEBSII   | 2.098 Å | Lukes, I.; Cisarova, I.; Vojtisek, P.; Bazakas, K. <i>Polyhedron</i> <b>1995</b> , 14, 3163. [Co(H <sub>2</sub> O) <sub>6</sub> ](C <sub>6</sub> H <sub>14</sub> N <sub>2</sub> O <sub>4</sub> P <sub>2</sub> ) <sub>2</sub>                                                                                                                                                                        |
| 162315   | 2.099 Å | Bosi, F.; Belardi, G.; Ballirano, P. <i>Am. Miner.</i> <b>2009</b> , 94, 74. K <sub>2</sub> [Co(H <sub>2</sub> O) <sub>6</sub> ](SO <sub>4</sub> ) <sub>2</sub>                                                                                                                                                                                                                                     |
| 409999   | 2.099 Å | Euler, H.; Barbier, B.; Meents, A.; Kirfel, A. <i>Z. Kristallogr. - New Cryst. Struc.</i> <b>2009</b> , 224, 351. K <sub>2</sub> [Co(H <sub>2</sub> O) <sub>6</sub> ](SeO <sub>4</sub> ) <sub>2</sub>                                                                                                                                                                                               |
| BUGFEO   | 2.099 Å | Gatehouse, B. M. <i>Cryst. Struct. Commun.</i> <b>1982</b> , 11, 1793. [Co(H <sub>2</sub> O) <sub>6</sub> ](C <sub>13</sub> H <sub>10</sub> NO <sub>4</sub> S) <sub>2</sub>                                                                                                                                                                                                                         |
| QESFUP   | 2.099 Å | Ammar, M. K.; Jouini, T.; Driss, A. <i>J. Chem. Cryst.</i> <b>2000</b> , 30, 265. [Co(H <sub>2</sub> O) <sub>6</sub> ][CoC <sub>12</sub> H <sub>32</sub> N <sub>8</sub> O <sub>4</sub> ](SO <sub>4</sub> ) <sub>2</sub> ·6H <sub>2</sub> O [Co(H <sub>2</sub> O) <sub>6</sub> ][CoC <sub>12</sub> H <sub>32</sub> N <sub>8</sub> O <sub>4</sub> ](SO <sub>4</sub> ) <sub>2</sub> ·6H <sub>2</sub> O |
| QESFUP01 | 2.099 Å | Chew Hee Ng; Siang Guan Teoh; N.Moris; Siaw Yang Yap <i>J. Coord. Chem.</i> <b>2004</b> , 57, 1037.                                                                                                                                                                                                                                                                                                 |
| RISPEP   | 2.099 Å | Aghabozorg, H.; Gharamaleki, J. A.; Daneshvar, S.; Ghadermazi, M.; Khavasi, H. R. <i>Acta Crystallogr., Sect. E</i> <b>2008</b> , 64, m187. [Co(H <sub>2</sub> O) <sub>6</sub> ](C <sub>3</sub> H <sub>7</sub> N <sub>6</sub> ) <sub>2</sub> [CoC <sub>14</sub> H <sub>6</sub> N <sub>2</sub> O <sub>8</sub> ] <sub>2</sub> ·4H <sub>2</sub> O                                                      |
| SIWWIE10 | 2.099 Å | Yue Guan; Yi-Gui Gao; Yen-Chywan Liaw; Robinson, H.; Wang, A. H.-J. <i>J. Biomol. Struct. Dyn.</i> <b>1993</b> , 11, 253. [Co(H <sub>2</sub> O) <sub>6</sub> ][Co(H <sub>2</sub> O) <sub>4</sub> (C <sub>22</sub> H <sub>22</sub> N <sub>10</sub> O <sub>14</sub> P <sub>2</sub> ) <sub>2</sub> ]·12H <sub>2</sub> O                                                                                |
| VILQIR   | 2.099 Å | Khatua, S.; Harada, T.; Kuroda, R.; Bhattacharjee, M. <i>Chem. Commun.</i> <b>2007</b> , 3927. [Co(H <sub>2</sub> O) <sub>6</sub> ][MoC <sub>19</sub> H <sub>26</sub> NO <sub>7</sub> ] <sub>2</sub> ·[CoMo <sub>2</sub> C <sub>38</sub> H <sub>60</sub> NO <sub>18</sub> ] <sub>2</sub> ·2(CH <sub>3</sub> ) <sub>2</sub> CHOH·4H <sub>2</sub> O                                                   |
| APOWUZ   | 2.100 Å | Paul, L.; Dolai, M.; Panja, A.; M.Ali, M. <i>New J. Chem.</i> <b>2016</b> , 40, 6931. [Co(H <sub>2</sub> O) <sub>6</sub> ](C <sub>6</sub> H <sub>16</sub> N <sub>2</sub> O) <sub>2</sub> [Mo <sub>5</sub> O <sub>23</sub> P <sub>2</sub> ] <sub>2</sub> ·4H <sub>2</sub> O                                                                                                                          |
| ZZZPAU01 | 2.100 Å | Morris, J. E.; Squattrito, P. J.; Kirschbaum, K.; Pinkerton, A. A. <i>J. Chem. Cryst.</i> <b>2003</b> , 33, 307. [Co(H <sub>2</sub> O) <sub>6</sub> ](C <sub>10</sub> H <sub>8</sub> NO <sub>3</sub> S) <sub>2</sub> ·3H <sub>2</sub> O                                                                                                                                                             |
| 143144   | 2.101 Å | Si, C.; Ma, P.; Han, Q.; Jiao, J.; Du, W.; Wu, J.; Li, M.; Niu, J. <i>Inorg. Chem.</i> <b>2021</b> , 60, 682. [Co(H <sub>2</sub> O) <sub>6</sub> ] <sub>2</sub> [Co(H <sub>2</sub> O) <sub>4</sub> (WZn <sub>3</sub> (H <sub>2</sub> O) <sub>2</sub> )(ZnW <sub>9</sub> O <sub>34</sub> ) <sub>2</sub> ] <sub>2</sub> ·8H <sub>2</sub> O                                                            |

|        |         |                                                                                                                                                                                                                                                                                                                                                                                                     |
|--------|---------|-----------------------------------------------------------------------------------------------------------------------------------------------------------------------------------------------------------------------------------------------------------------------------------------------------------------------------------------------------------------------------------------------------|
| AYOFAX | 2.101 Å | Baruah, J. B. CCDC deposition number 749993, <b>2016</b> . [Co(H <sub>2</sub> O) <sub>6</sub> ]( <i>p</i> -OCCC <sub>6</sub> H <sub>4</sub> OH) <sub>2</sub> ·2C <sub>7</sub> H <sub>4</sub> NO <sub>4</sub> ·3H <sub>2</sub> O                                                                                                                                                                     |
| MOTMIS | 2.101 Å | Wang, J.; Ma, P.; Shen, Y.; Niu, J. <i>Cryst. Growth Des.</i> <b>2008</b> , <i>8</i> , 3130.                                                                                                                                                                                                                                                                                                        |
| VAWXAS | 2.101 Å | (H <sub>3</sub> N(CH <sub>2</sub> ) <sub>6</sub> NH <sub>3</sub> ) <sub>4</sub> [Co(H <sub>2</sub> O) <sub>6</sub> ][Co <sub>4</sub> Ge <sub>2</sub> W <sub>18</sub> H <sub>6</sub> O <sub>70</sub> ]·5.5H <sub>2</sub> O                                                                                                                                                                           |
| VONRAT | 2.101 Å | Poleti, D.; Karanovic, L. <i>Acta Crystallogr., Sect. C</i> <b>1989</b> , <i>45</i> , 1716. [Co(H <sub>2</sub> O) <sub>6</sub> ][CoC <sub>10</sub> H <sub>10</sub> O <sub>12</sub> ]·7.36H <sub>2</sub> O                                                                                                                                                                                           |
| 162999 | 2.102 Å | Garczarek, P.; Janczak, J.; Duczmal, M.; Zon, J. <i>Polyhedron</i> <b>2014</b> , <i>81</i> , 132. [Co(H <sub>2</sub> O) <sub>6</sub> ](C <sub>12</sub> H <sub>19</sub> O <sub>9</sub> P <sub>3</sub> )·6H <sub>2</sub> O                                                                                                                                                                            |
| ASUDIB | 2.102 Å | Zheng Guoli; Ma Jianfang; Yang Jin <i>J. Chem. Res.</i> <b>2004</b> , 387. [Co(H <sub>2</sub> O) <sub>6</sub> ][Co(H <sub>2</sub> O) <sub>4</sub> ((CH <sub>2</sub> (PO <sub>3</sub> H)) <sub>2</sub> (NH)(CH <sub>2</sub> ) <sub>6</sub> (NH)((CH <sub>2</sub> (PO <sub>3</sub> H)) <sub>2</sub> ) <sub>2</sub> )]·12H <sub>2</sub> O                                                              |
| AZIHIC | 2.102 Å | Ji-Wei Liu; J.-W.; Huo; L.-H.; Gao; S.; Ng, S. W. <i>Acta Crystallogr., Sect. E</i> <b>2004</b> , <i>60</i> , m439. [Co(H <sub>2</sub> O) <sub>6</sub> ] <i>p</i> -C <sub>6</sub> H <sub>4</sub> (OCH <sub>2</sub> COO) <sub>2</sub>                                                                                                                                                                |
| DOWFUS | 2.102 Å | Gong, T.; Lou, X.; Fang, J.-J.; Gao, E.-Q.; Hu, B. <i>Dalton Trans.</i> <b>2016</b> , <i>45</i> , 10109. [Co(H <sub>2</sub> O) <sub>6</sub> ][Co <sub>3</sub> C <sub>26</sub> H <sub>18</sub> N <sub>17</sub> O <sub>10</sub> ] <sub>2</sub> ·4H <sub>2</sub> O                                                                                                                                     |
| EBIKUX | 2.102 Å | Clegg, W.; Holcroft, J. M. <i>Cryst Growth Des.</i> <b>2014</b> , <i>14</i> , 6282. [Co(H <sub>2</sub> O) <sub>6</sub> ][Co <sub>5</sub> C <sub>24</sub> H <sub>40</sub> O <sub>44</sub> ]·4H <sub>2</sub> O                                                                                                                                                                                        |
| FEMHEN | 2.102 Å | Shi, L.-X.; Xu, X.; Wu, C.-D. <i>CrystEngComm</i> <b>2011</b> , <i>13</i> , 6027. [Co(H <sub>2</sub> O) <sub>6</sub> ][GdC <sub>18</sub> H <sub>10</sub> N <sub>2</sub> O <sub>20</sub> ]·3H <sub>2</sub> O                                                                                                                                                                                         |
| KOMGOK | 2.102 Å | Shankar, K.; Baruah, J. B. <i>Chem. Sel.</i> <b>2016</b> , <i>1</i> , 5152. [Co(H <sub>2</sub> O) <sub>6</sub> ][CoC <sub>52</sub> H <sub>58</sub> N <sub>10</sub> O <sub>8</sub> ]Cl <sub>4</sub> ·5H <sub>2</sub> O                                                                                                                                                                               |
| TUGCEG | 2.102 Å | Huang, X.-F.; Ma, J.-X.; Liu, W.-S. <i>Inorg. Chem.</i> <b>2014</b> , <i>53</i> , 5922. [Co(H <sub>2</sub> O) <sub>6</sub> ][CoGdC <sub>12</sub> H <sub>12</sub> O <sub>15</sub> ]·6H <sub>2</sub> O                                                                                                                                                                                                |
| VENDIB | 2.102 Å | Liu, J.; Lu, Y.; Lu, W. <i>Dalton Trans.</i> <b>2020</b> , <i>49</i> , 4044. [Co(H <sub>2</sub> O) <sub>6</sub> ][CoC <sub>10</sub> H <sub>10</sub> O <sub>12</sub> ]·C <sub>26</sub> H <sub>20</sub> N <sub>2</sub> O <sub>4</sub> ·4H <sub>2</sub> O                                                                                                                                              |
| YUJCOY | 2.102 Å | Burstein, I. F.; Gerbeleu, N. V.; Bologa, O. A.; Verezhnan, A. V.; Malinovskii, T. I. <i>Dokl. Akad. Nauk SSSR</i> <b>1988</b> , <i>300</i> , 1382. [Co(H <sub>2</sub> O) <sub>6</sub> ][CoC <sub>6</sub> H <sub>4</sub> N <sub>6</sub> O <sub>4</sub> S <sub>2</sub> ] <sub>2</sub> ·3H <sub>2</sub> O                                                                                             |
| ZADSUV | 2.102 Å | Chen, X.-L.; Shen, Y.-J.; Gao, C.; Yang, J.; Sun, X.; Zhang, X.; Yang, Y.-D.; Wei, G.-P.; Xiang, J.-F.; Sessler, J. L.; Gong, H.-Y. <i>J. Am. Chem. Soc.</i> <b>2020</b> , <i>142</i> , 7443. [Co(H <sub>2</sub> O) <sub>6</sub> ](C <sub>38</sub> H <sub>34</sub> N <sub>10</sub> )(1,4-(OOC)C <sub>6</sub> H <sub>4</sub> ) <sub>3</sub> ·2(CH <sub>3</sub> ) <sub>2</sub> NCHO·2H <sub>2</sub> O |
| 418030 | 2.103 Å | An, H.; Wang, L.; Hu, Y.; Xu, T.; Hou, Y. <i>Inorg. Chem.</i> <b>2016</b> , <i>55</i> , 144. [Co(H <sub>2</sub> O) <sub>6</sub> ](C <sub>8</sub> H <sub>8</sub> NO <sub>2</sub> ) <sub>4</sub> [Co <sub>2</sub> Mo <sub>10</sub> H <sub>4</sub> O <sub>38</sub> ]·5H <sub>2</sub> O                                                                                                                 |
| AYABOR | 2.103 Å | Mestiri, I.; Aved, B.; Haddad, A. <i>J. Cluster Sci.</i> <b>2013</b> , <i>24</i> , 85. Na <sub>4</sub> [Co(H <sub>2</sub> O) <sub>6</sub> ][V <sub>10</sub> O <sub>28</sub> ]·18H <sub>2</sub> O                                                                                                                                                                                                    |
| DUNJON | 2.103 Å | Guo; Q.-L.; Zhu; W.-X.; Ma; S.-L.; Dong; S.-J.; Xu, M.-Q.; <i>Polyhedron</i> <b>2004</b> , <i>23</i> , 1461. [Co(H <sub>2</sub> O) <sub>6</sub> ](C <sub>12</sub> H <sub>28</sub> N <sub>2</sub> O <sub>4</sub> )[CoC <sub>24</sub> H <sub>18</sub> O <sub>19</sub> S <sub>8</sub> ] <sub>2</sub> ·2C <sub>12</sub> H <sub>26</sub> N <sub>2</sub> O <sub>4</sub> ·12H <sub>2</sub> O               |
| IDANUX | 2.103 Å | Song, B.-Q.; Wang, X.-L.; Sun, C.-Y.; Zhang, Y.-T.; Wu, X.-S.; Yang, L.; Shao, K.-Z.; Zhao, L.; Su, Z.-M. <i>Dalton Trans.</i> <b>2015</b> , <i>44</i> , 13818. [Co(H <sub>2</sub> O) <sub>6</sub> ][CoW <sub>9</sub> C <sub>36</sub> H <sub>36</sub> N <sub>12</sub> O <sub>40</sub> P] <sub>2</sub> ·10H <sub>2</sub> O                                                                           |
| LUVMIZ | 2.103 Å | Galloway, K. W.; Parkin, A.; Harte, S. M.; Ferguson, A.; Murrie, M. <i>CrystEngComm</i> <b>2006</b> , <i>8</i> , 346. ((C <sub>2</sub> H <sub>5</sub> ) <sub>4</sub> ) <sub>2</sub> [Co(H <sub>2</sub> O) <sub>6</sub> ](SO <sub>4</sub> ) <sub>2</sub> ·4H <sub>2</sub> O                                                                                                                          |
|        |         | Kunnas-Hiltunen, S.; Laurila, E.; Haukka, M.; Vepsalainen, J.; Ahlgren, M. Z. <i>Anorg. Allg. Chem.</i> <b>2010</b> , <i>636</i> , 710. [Co(H <sub>2</sub> O) <sub>6</sub> ](C <sub>15</sub> H <sub>10</sub> Cl <sub>2</sub> O <sub>8</sub> P <sub>2</sub> )·[Co(H <sub>2</sub> O) <sub>5</sub> (C <sub>15</sub> H <sub>10</sub> Cl <sub>2</sub> O <sub>8</sub> P <sub>2</sub> )]·2H <sub>2</sub> O |

|          |         |                                                                                                                                                                                                                                                                                                                                                                                                                   |
|----------|---------|-------------------------------------------------------------------------------------------------------------------------------------------------------------------------------------------------------------------------------------------------------------------------------------------------------------------------------------------------------------------------------------------------------------------|
| SEFXEH   | 2.103 Å | Sheshmani, S.; Aghabozorg, H. ; Panah, F. M. ; Alizadeh, R. ; Kickelbick, G. ; Nakhjavan, B. ; Moghimi, A., Ramezanipour, F. ; Aghabozorg, H. R. <i>Z. Anorg. Allg. Chem.</i> <b>2006</b> , 632, 469.<br>C(NH <sub>2</sub> ) <sub>3</sub> [Co(H <sub>2</sub> O) <sub>6</sub> ][CoC <sub>14</sub> H <sub>6</sub> N <sub>2</sub> O <sub>8</sub> ]                                                                   |
| ZIQGEN   | 2.103 Å | Niu, Z.; Ma, J.-G.; Shi, W.; Cheng, P. <i>Chem. Commun.</i> <b>2014</b> , 50, 1839.<br>[Co(H <sub>2</sub> O) <sub>6</sub> ][Co <sub>3</sub> Gd <sub>2</sub> C <sub>42</sub> H <sub>28</sub> N <sub>6</sub> O <sub>36</sub> ]·6H <sub>2</sub> O                                                                                                                                                                    |
| HADXES   | 2.104 Å | Falaise, C.; Delille, J. ; Volkringer, C. ; Vezin, H.; Rabu, P. ; Loiseau, T. <i>Inorg. Chem.</i> <b>2016</b> , 55, 10453.<br>[Co(H <sub>2</sub> O) <sub>6</sub> ][U <sub>2</sub> C <sub>24</sub> H <sub>12</sub> O <sub>16</sub> ]·3H <sub>2</sub> O                                                                                                                                                             |
| RAXMIN   | 2.104 Å | Bourne, S. A.; Moitsheki, L. J. <i>CrystEngComm</i> <b>2005</b> , 7, 674. [Co(H <sub>2</sub> O) <sub>6</sub> ]Cl <sub>2</sub> ·2C <sub>10</sub> H <sub>8</sub> N <sub>2</sub> O <sub>2</sub> ·8H <sub>2</sub> O                                                                                                                                                                                                   |
| VILQUD   | 2.099 Å | Khatua, S.; Harada, T.; Kuroda, R.; Bhattacharjee, M. <i>Chem. Commun.</i> <b>2007</b> , 3927.<br>[Co(H <sub>2</sub> O) <sub>6</sub> ][MoC <sub>19</sub> H <sub>26</sub> NO <sub>7</sub> ] <sub>2</sub> ·3H <sub>2</sub> O                                                                                                                                                                                        |
| COXSIR   | 2.106 Å | Zviedre, I. I.; Fundamenskii, V. S.; Kolesnikova, G. P. <i>Koord. Khim.</i> <b>1984</b> , 10, 1408.<br>[Co(H <sub>2</sub> O) <sub>6</sub> ] <sub>2</sub> (C <sub>12</sub> H <sub>12</sub> BO <sub>14</sub> ) <sub>2</sub> ·2H <sub>2</sub> O                                                                                                                                                                      |
| GENBIO   | 2.106 Å | Serezhkin, V. N.; Shimin, N. A.; Grigoriev, M. S.; Serezhkina, L. B. <i>Russ. J. Coord. Chem.</i> <b>2022</b> , 48, 579. [Co(H <sub>2</sub> O) <sub>6</sub> ][UO <sub>2</sub> (O <sub>2</sub> C <sub>4</sub> H <sub>5</sub> ) <sub>3</sub> ] <sub>2</sub> ·8H <sub>2</sub> O                                                                                                                                      |
| MOBFIT   | 2.106 Å | Campo, J.; Falvello, L. R.; Mayoral, I.; Palacio, F.; Soler, T.; Tomas, M. <i>J. Am. Chem. Soc.</i> <b>2008</b> , 130, 2932. Cs <sub>4</sub> [Co(H <sub>2</sub> O) <sub>6</sub> ] <sub>2</sub> [Co <sub>13</sub> C <sub>48</sub> H <sub>68</sub> O <sub>74</sub> ]·3H <sub>2</sub> O                                                                                                                              |
| SIDKAS   | 2.106 Å | Sun, R.; Li, Y.-Z.; Bai, J.; Pan, Y. <i>Cryst. Growth Des.</i> <b>2007</b> , 7, 890.<br>[Co(H <sub>2</sub> O) <sub>6</sub> ] <sub>2</sub> [Co <sub>2</sub> C <sub>30</sub> H <sub>36</sub> N <sub>6</sub> O <sub>24</sub> ]·3H <sub>2</sub> O                                                                                                                                                                     |
| 10216    | 2.107 Å | Rau, V. G.; Kurkutova, E. N. <i>Kristallografiya</i> <b>1972</b> , 17, 1124. (NH <sub>4</sub> ) <sub>2</sub> [Co(H <sub>2</sub> O) <sub>6</sub> ](SO <sub>4</sub> ) <sub>2</sub>                                                                                                                                                                                                                                  |
| POGQIO   | 2.107 Å | Mohan, M.; Rajak, S.; Tremblay, A. A.; Maris, T.; Duong, A. <i>Dalton Trans.</i> <b>2019</b> , 48, 7006.<br>[Co(H <sub>2</sub> O) <sub>6</sub> ][Co(H <sub>2</sub> O) <sub>2</sub> (C <sub>6</sub> H <sub>3</sub> N <sub>7</sub> O <sub>3</sub> ) <sub>2</sub> ] <sub>0.26</sub> [Co(H <sub>2</sub> O) <sub>2</sub> (C <sub>6</sub> H <sub>3</sub> N <sub>7</sub> O <sub>3</sub> ) <sub>2</sub> ] <sub>0.74</sub> |
| CAFHAU   | 2.108 Å | Zhang, Y.-N.; Zhou, B.-B.; Sha, J.-Q.; Su, Z.-H. <i>Fenzi Kexue Xuebao</i> <b>2011</b> , 27, 7.<br>[Co(H <sub>2</sub> O) <sub>6</sub> ] <sub>2</sub> (C <sub>5</sub> H <sub>6</sub> N) <sub>6</sub> [CoMo <sub>12</sub> H <sub>6</sub> O <sub>62</sub> P <sub>8</sub> ]·10H <sub>2</sub> O                                                                                                                        |
| 23934    | 2.109 Å | Zalkin, A.; Ruben, H.; Templeton, D. H. <i>Acta Crystallogr.</i> <b>1962</b> , 15, 1219. [Co(H <sub>2</sub> O) <sub>6</sub> ]SO <sub>4</sub>                                                                                                                                                                                                                                                                      |
| GADPAF   | 2.109 Å | Surinwong, S.; Yoshinari, N.; Yotnoi, B.; Konno, T. <i>Chem. Asian J.</i> <b>2016</b> , 11, 486.<br>[Co(H <sub>2</sub> O) <sub>6</sub> ] <sub>2</sub> [Co(H <sub>2</sub> O) <sub>4</sub> ][Au <sub>3</sub> Co <sub>2</sub> C <sub>30</sub> H <sub>54</sub> N <sub>6</sub> O <sub>12</sub> S <sub>6</sub> ] <sub>2</sub> ·xH <sub>2</sub> O                                                                        |
| TIZQAX   | 2.110 Å | Wolodkiewicz, W.; Brzyska, W.; Rzaczynska, Z.; Glowiak, T. <i>Pol. J. Chem.</i> <b>1995</b> , 69, 1392.<br>[Co(H <sub>2</sub> O) <sub>6</sub> ]B <sub>12</sub> H <sub>12</sub>                                                                                                                                                                                                                                    |
| AHIWUM   | 2.111 Å | Jiang, Z.-G.; Mao, W.-T.; Huang, D.-P.; Wang, Y.; Wang, X.-J.; Zhan, C. H. <i>Nanoscale</i> <b>2020</b> , 12, 10166.<br>Na[Co(H <sub>2</sub> O) <sub>6</sub> ][H <sub>2</sub> W <sub>12</sub> O <sub>40</sub> P]Co(H <sub>2</sub> O) <sub>4</sub> ] <sub>3</sub> ·3C <sub>48</sub> H <sub>80</sub> O <sub>40</sub> ·6H <sub>2</sub> O                                                                             |
| BILWEB   | 2.112 Å | Duan, Y.; Clemente-Juan, J. M.; Gimenez-Saiz, C.; Coronado, E. <i>Front. Chem.</i> <b>2018</b> , 6, 231.                                                                                                                                                                                                                                                                                                          |
| MGHBZB10 | 2.112 Å | Nadzhafov, G. N.; Mamedov, K. S.; Shnulin, A. N.; Movsumov, E. M.; Amiraslanov, I. R.; Usubaliev, B. T.; Akhmedov, A. I. <i>Dokl. Akad. Nauk Az. SSR</i> <b>1980</b> , 36, 36. [Co(H <sub>2</sub> O) <sub>6</sub> ] <sub>2</sub> (p-OCC <sub>6</sub> H <sub>4</sub> OH) <sub>2</sub> ·2H <sub>2</sub> O                                                                                                           |



|          |         |                                                                                                                                                                                                                                                                                                                                                              |
|----------|---------|--------------------------------------------------------------------------------------------------------------------------------------------------------------------------------------------------------------------------------------------------------------------------------------------------------------------------------------------------------------|
| MGHBZB20 | 2.112 Å | Shnulin, A. N.; Nadzhafov, G. N.; Amiraslanov, I. R.; Usubaliev, B. T.; Mamedov, K. S. <i>Koord. Khim.</i> <b>1981</b> , 7, 1409. [Co(H <sub>2</sub> O) <sub>6</sub> ] <sub>2</sub> ( <i>p</i> -OOCCH <sub>2</sub> CH <sub>2</sub> OH) <sub>2</sub> ·2H <sub>2</sub> O                                                                                       |
| VUXVEQ   | 2.114 Å | Palacios, M. A.; Rodriguez-Dieguez, A.; Sironi, A.; Herrera, J. M.; Mota, A. J.; Cano, J.; Colacio, E. <i>Dalton Trans.</i> <b>2009</b> , 8538. [Co(H <sub>2</sub> O) <sub>6</sub> ][NiC <sub>54</sub> H <sub>36</sub> N <sub>12</sub> O <sub>6</sub> ]·C <sub>4</sub> H <sub>8</sub> O·10H <sub>2</sub> O                                                   |
| HAHKOR   | 2.118 Å | Worl, S.; Hellwinkel, D.; Pritzkow, H.; Hofmann, M.; Kramer, R. <i>Dalton Trans.</i> <b>2004</b> , 2750. [Co(H <sub>2</sub> O) <sub>6</sub> ] <sub>2</sub> [CoC <sub>21</sub> H <sub>14</sub> NO <sub>7</sub> ] <sub>2</sub> ·6H <sub>2</sub> O                                                                                                              |
| XAJPOO   | 2.118 Å | Milway, V. A.; Thompson, L. K.; Miller, D. O. <i>Chem. Commun.</i> <b>2004</b> , 1790. [Co(H <sub>2</sub> O) <sub>6</sub> ][Co <sub>12</sub> C <sub>207</sub> H <sub>138</sub> Cl <sub>9</sub> N <sub>51</sub> O <sub>48</sub> ](NO <sub>3</sub> ) <sub>8</sub> ·3CH <sub>3</sub> CN·6H <sub>2</sub> O                                                       |
| HIGQIA   | 2.119 Å | Hou, Y.; An, H.; Zhang, Y.; Hu, T.; Yang, W.; Chang, S. <i>ACS Catal.</i> <b>2018</b> , 8, 6062. K <sub>10</sub> [Co(H <sub>2</sub> O) <sub>6</sub> ] <sub>2</sub> [AsMo <sub>6</sub> C <sub>21</sub> H <sub>15</sub> O <sub>30</sub> ] <sub>2</sub> ·23H <sub>2</sub> O                                                                                     |
| 166931   | 2.120 Å | Tang J.; Yang X.; Zhang X.; Wang M.; Wu, W. <i>Dalton Trans.</i> <b>2010</b> , 39, 3396. [Co(H <sub>2</sub> O) <sub>6</sub> ] <sub>2</sub> {[Co(H <sub>2</sub> O) <sub>4</sub> ] <sub>2</sub> [Co(H <sub>2</sub> O) <sub>5</sub> ] <sub>2</sub> WZn[Co(H <sub>2</sub> O)] <sub>2</sub> (ZnW <sub>9</sub> O <sub>34</sub> ) <sub>2</sub> }·10H <sub>2</sub> O |
| IQUDON   | 2.124 Å | Kom-Bei Shiu; Chia-Hung Yen; Fen-Ling Liao; Sue-Lein Wang <i>Acta Crystallogr., Sect. E</i> <b>2004</b> , 60, m35. [Co(H <sub>2</sub> O) <sub>6</sub> ][CoC <sub>14</sub> H <sub>6</sub> N <sub>2</sub> O <sub>8</sub> ]·2H <sub>2</sub> O                                                                                                                   |
| 418653   | 2.131 Å | Driss, H.; Thouvenot, R.; Debbabi, M. <i>Polyhedron</i> <b>2008</b> , 27, 2059. K <sub>2</sub> [Co(H <sub>2</sub> O) <sub>6</sub> ][V <sub>2</sub> W <sub>4</sub> O <sub>19</sub> ]                                                                                                                                                                          |
| 418652   | 2.132 Å | Driss, H.; Thouvenot, R.; Debbabi, M. <i>Polyhedron</i> <b>2008</b> , 27, 2059. K <sub>2</sub> [Co(H <sub>2</sub> O) <sub>6</sub> ][V <sub>2</sub> W <sub>4</sub> O <sub>19</sub> ]                                                                                                                                                                          |
| HIGRIB   | 2.137 Å | Hou, Y.; An, H.; Zhang, Y.; Hu, T.; Yang, W.; Chang, S. <i>ACS Catal.</i> <b>2018</b> , 8, 6062. K <sub>6</sub> (H <sub>3</sub> O) <sub>2</sub> [Na(H <sub>2</sub> O) <sub>6</sub> ] <sub>2</sub> [Co(H <sub>2</sub> O) <sub>6</sub> ][AsMo <sub>6</sub> C <sub>9</sub> H <sub>21</sub> N <sub>3</sub> O <sub>27</sub> ] <sub>4</sub> ·27H <sub>2</sub> O    |
| 28662    | 2.146 Å | Ferrari, A.; Colla, C. <i>Gazz. Chim. Ital.</i> <b>1937</b> , 67, 294. [Co(H <sub>2</sub> O) <sub>6</sub> ](H <sub>2</sub> PO <sub>4</sub> ) <sub>2</sub>                                                                                                                                                                                                    |
| MAJREX   | 2.160 Å | Liang, Z.-Y.; Chen, H.-Y.; Shan, C.-Y.; Zhang, Y.-Q.; Tao, Z. <i>Polyhedron</i> <b>2016</b> , 110, 125. [Co(H <sub>2</sub> O) <sub>6</sub> ][KNdC <sub>30</sub> H <sub>36</sub> Cl <sub>2</sub> N <sub>20</sub> O <sub>13</sub> ] <sub>2</sub> Cl <sub>6</sub> ·21H <sub>2</sub> O                                                                           |
| GIMPAV   | 2.162 Å | Kovalchukova, O. V.; Stash, A. I.; Nguen, D. D.; Strashnova, S. B.; Belsky, V. K. <i>Koord. Khim.</i> <b>2013</b> , 39, 136. [Co(H <sub>2</sub> O) <sub>6</sub> ][C <sub>5</sub> HN <sub>2</sub> O <sub>6</sub> ] <sub>2</sub> ·2H <sub>2</sub> O                                                                                                            |
| MAJRAT   | 2.163 Å | Liang, Z.-Y.; Chen, H.-Y.; Shan, C.-Y.; Zhang, Y.-Q.; Tao, Z. <i>Polyhedron</i> <b>2016</b> , 110, 125. [Co(H <sub>2</sub> O) <sub>6</sub> ][KPrC <sub>30</sub> H <sub>36</sub> Cl <sub>2</sub> N <sub>20</sub> O <sub>13</sub> ] <sub>2</sub> Cl <sub>6</sub> ·19H <sub>2</sub> O                                                                           |
| ROSSID   | 2.164 Å | Zhu, Z.; Bai, Y.-L.; Zhang, L.; Sun, D.; Fang, J.; Zhu, S. <i>Chem. Commun.</i> <b>2014</b> , 50, 14674. ((CH <sub>3</sub> ) <sub>2</sub> NH <sub>2</sub> ) <sub>6</sub> [Co(H <sub>2</sub> O) <sub>6</sub> ] <sub>3</sub> [CoC <sub>54</sub> H <sub>36</sub> N <sub>12</sub> O <sub>30</sub> ] <sub>2</sub> ·6H <sub>2</sub> O                              |
| CIKYAY   | 2.174 Å | Shankar, K.; Das, B.; Baruah, J. B. <i>Eur. J. Inorg. Chem.</i> <b>2013</b> , 6147. [Co(H <sub>2</sub> O) <sub>6</sub> ][CuC <sub>14</sub> H <sub>6</sub> N <sub>2</sub> O <sub>8</sub> ]·2H <sub>2</sub> O                                                                                                                                                  |
| ROCFUL   | 2.177 Å | Bi, J.; Kong, L.; Huang, Z.; Liu, J. <i>Inorg. Chem.</i> <b>2008</b> , 47, 4564. [Co(H <sub>2</sub> O) <sub>6</sub> ][CoC <sub>24</sub> H <sub>20</sub> N <sub>4</sub> O <sub>2</sub> ](C <sub>9</sub> H <sub>3</sub> O <sub>6</sub> ) <sub>2</sub> ·21.5H <sub>2</sub> O                                                                                    |
| ESECOW   | 2.178 Å | Tian, D.; Xu, J.; Xie, Z.; Yao, Z.-Q.; Fu, D.-L.; Zhou, Z.; Bu, X.-H. <i>Adv. Sci.</i> <b>2016</b> , 3, 1500283. [Co(H <sub>2</sub> O) <sub>6</sub> ][Co <sub>6</sub> C <sub>168</sub> H <sub>134</sub> N <sub>12</sub> O <sub>8</sub> ]                                                                                                                     |

|             |                               |                                                                                                                                                                                                                                                                                                                             |
|-------------|-------------------------------|-----------------------------------------------------------------------------------------------------------------------------------------------------------------------------------------------------------------------------------------------------------------------------------------------------------------------------|
| 249616      | 2.197 Å                       | Xiaobing; C.; Kechang; L.; Ling; Y.; Yan; C.; Jiqing; X.; Weijie; D.; Haihui; Y.; Zhihui; J.; Jiwen, C. <i>J. Solid State Chem.</i> <b>2008</b> , <i>181</i> , 221. [H <sub>2</sub> As <sub>6</sub> V <sub>15</sub> O <sub>42</sub> (H <sub>2</sub> O)][Co(H <sub>2</sub> O) <sub>6</sub> ] <sub>2</sub> ·2H <sub>2</sub> O |
| GADPAF      | 2.241 Å                       | Surinwong, S.; Yoshinari, N.; Yotnoi, B.; Konno, T. <i>Chem. Asian J.</i> <b>2016</b> , <i>11</i> , 486. [Co(H <sub>2</sub> O) <sub>6</sub> ] <sub>3</sub> [Au <sub>3</sub> Co <sub>2</sub> C <sub>30</sub> H <sub>54</sub> N <sub>6</sub> O <sub>12</sub> S <sub>6</sub> ] <sub>2</sub> ·xH <sub>2</sub> O                 |
| <b>Mean</b> | <b>2.088 Å/446 structures</b> |                                                                                                                                                                                                                                                                                                                             |

### ***Dimeric hydrate***

*Six-coordination, octahedral configuration*

ICSD/CSD code  $d(\text{Co-O})_b + d(\text{Co-O})_l/d(\text{Co}\cdots\text{Co})$  Reference, compound formula

[Co<sub>2</sub>(H<sub>2</sub>O)<sub>10</sub>]<sup>4+</sup>

|        |                 |                                                                                                                                                                     |
|--------|-----------------|---------------------------------------------------------------------------------------------------------------------------------------------------------------------|
| KOMWOZ | 2.174 + 2.033 Å | Han, Y.-F.; Li, M.; Wang, T.-W.; Li, Y.-Z.; Shen, Z.; Song, Y.; You; X.-Z. <i>Inorg. Chem. Comm.</i> <b>2008</b> ,                                                  |
|        | 3.355 Å         | <i>11</i> , 945. [Co <sub>2</sub> (H <sub>2</sub> O) <sub>10</sub> ](C <sub>10</sub> H <sub>2</sub> O <sub>8</sub> S <sub>2</sub> ) <sub>2</sub> ·2H <sub>2</sub> O |

## Cobalt(III)

*Six-coordination, octahedral configuration*

ICSD/CSD code  $d(\text{Co-O})$

201214 1.873 Å

Reference, compound formula

Beattie, J. K.; Best, S. P.; Skelton, B. W.; White, A. H. *J. Chem. Soc., Dalton Trans.* **1981**, 2105.

$\text{Cs}[\text{Co}(\text{H}_2\text{O})_6](\text{SO}_4)_2 \cdot 6\text{H}_2\text{O}$

**Table S1au.** Summary of solid state structures containing hydrated rhodium(III) and iridium ions. The ICSD/CDS code refers to the code in the Inorganic Crystal Structure Database (ICSD, number) and Cambridge Structure Database (CSD, letters), respectively, and the mean Rh/Ir-O bond distance,  $d(\text{Rh/Ir-O})$ . Data in purple text are not included in the mean distance as they are uncertain or differ significantly from the mean value.

### Rhodium(III)

*Six-coordination, octahedral configuration*

| ICSD/CSD code | $d(\text{Rh-O})$            | Reference, compound formula                                                                                                                                                                                              |
|---------------|-----------------------------|--------------------------------------------------------------------------------------------------------------------------------------------------------------------------------------------------------------------------|
| 186466        | 2.013 Å                     | Vorob'eva, S. N.; Baidina, I. A.; Belyaev, A. V.; Alferova, N. I. <i>J. Struct. Chem.</i> <b>2012</b> , 53, 125.<br>[Rh(H <sub>2</sub> O) <sub>6</sub> ]PO <sub>4</sub>                                                  |
| 186465        | 2.014 Å                     | Vorob'eva, S. N.; Baidina, I. A.; Belyaev, A. V.; Alferova, N. I. <i>J. Struct. Chem.</i> <b>2012</b> , 53, 125.<br>[Rh(H <sub>2</sub> O) <sub>6</sub> ] <sub>2</sub> (SO <sub>4</sub> ) <sub>3</sub> ·5H <sub>2</sub> O |
| <b>30747</b>  | <b>2.016 Å</b>              | <b>Armstrong, R. S.; Beattie, J. K.; Best, S. P.; Skelton, B. W.; White, A. H. <i>J. Chem. Soc., Dalton Trans.</i> 1983, 1973. Cs[Rh(H<sub>2</sub>O)<sub>6</sub>](SO<sub>4</sub>)<sub>2</sub>·6H<sub>2</sub>O</b>        |
| 136172        | 2.043 Å                     | Albrecht, R; Bretschneider, V.; Doert, T.; Ruck, M. Z. <i>Anorg. Allg. Chem.</i> 2021, 647, 1702.<br>Ba <sub>3</sub> [Rh(H <sub>2</sub> O) <sub>6</sub> ]·H <sub>2</sub> O                                               |
| 69059         | 2.132 Å                     | Fallon, G. D.; Spiccia, L. <i>Aust. J. Chem.</i> <b>1989</b> , 42, 2051. [Rh(H <sub>2</sub> O) <sub>6</sub> ](ClO <sub>4</sub> ) <sub>3</sub> ·3H <sub>2</sub> O                                                         |
| <b>Mean</b>   | <b>2.022 Å/4 structures</b> |                                                                                                                                                                                                                          |

### Iridium(III)

*Six-coordination, octahedral configuration*

| ICSD/CSD code | $d(\text{Ir-O})$           | Reference, compound formula                                                                                                                                                                                       |
|---------------|----------------------------|-------------------------------------------------------------------------------------------------------------------------------------------------------------------------------------------------------------------|
| <b>30748</b>  | <b>2.042 Å</b>             | <b>Armstrong, R. S.; Beattie, J. K.; Best, S. P.; Skelton, B. W.; White, A. H. <i>J. Chem. Soc., Dalton Trans.</i> 1983, 1973. Cs[Ir(H<sub>2</sub>O)<sub>6</sub>](SO<sub>4</sub>)<sub>2</sub>·6H<sub>2</sub>O</b> |
| <b>Mean</b>   | <b>2.042 Å/1 structure</b> |                                                                                                                                                                                                                   |

**Table S1av.** Summary of solid state structures containing hydrated nickel(II) ions. The ICSD/CDS code refers to the code in the Inorganic Crystal Structure Database (ICSD, number) and Cambridge Structure Database (CSD, letters), respectively, and the mean Ni-O bond distance,  $d(\text{Ni-O})$ ; ;  $d(\text{Ni-O})_b$  denotes bridging ligands and  $d(\text{Ni-O})_t$  terminal ligands. Data in purple text are not included in the mean distance as they are uncertain or differ significantly from the mean value.

## Nickel(II)

### Six-coordination, octahedral configuration

| ICSD/CSD code | $d(\text{Ni-O})$ | Reference, compound formula                                                                                                                                                                                                                                                                                           |
|---------------|------------------|-----------------------------------------------------------------------------------------------------------------------------------------------------------------------------------------------------------------------------------------------------------------------------------------------------------------------|
| GIDGAD        | 2.008 Å          | Ronson, T. K.; Giri, C.; Beyeh, N. K.; Minkkinen, A.; Topic, F.; Holstein, J. J.; Rissanen, K.; Nitschke, J. <i>R. Chem. Eur. J.</i> <b>2013</b> , <i>19</i> , 3374. $[\text{Ni}(\text{H}_2\text{O})_6]_2[\text{Ni}_4\text{C}_{144}\text{H}_96\text{N}_{24}\text{O}_{36}\text{S}_{12}] \cdot 68.08\text{H}_2\text{O}$ |
| KAXLEB        | 2.024 Å          | Wang, X.-B.; Z.-T.; Wang, Q.-Y. <i>Struct. Chem.</i> <b>2005</b> , <i>16</i> , 461. $[\text{Ni}(\text{H}_2\text{O})_6](\text{C}_{16}\text{H}_{11}\text{O}_7\text{S})_2 \cdot 10\text{H}_2\text{O}$                                                                                                                    |
| QOBTUX        | 2.024 Å          | Zhang, Z.-T.; Guo, Y.-N.; Liu, Q.-G. <i>Chin. J. Chem.</i> <b>2004</b> , <i>22</i> , 971. $[\text{Ni}(\text{H}_2\text{O})_6](\text{C}_{17}\text{H}_{13}\text{O}_9\text{S})_2 \cdot 10\text{H}_2\text{O}$                                                                                                              |
| CUYHEJ        | 2.025 Å          | Silin, E. Y.; Bel'skii, V. K.; Zinchenko, R. V.; Tetere, I. V.; Ozolin'sh, G. V. <i>Latv. PSR Zinat. Akad. Vestis, Khim. Ser.</i> <b>1984</b> , 369. $[\text{Ni}(\text{H}_2\text{O})_6](\text{C}_6\text{H}_{24}\text{B}_{12}\text{O}_{26})$                                                                           |
| QOQGEP        | 2.025 Å          | Hu, B.-W.; Zhao, J.-T.; Tao, J.; Sun, X.-J.; Yang, Q.; Zhang, X.-F.; Bu, X.-H. <i>Cryst. Growth Des.</i> <b>2010</b> , <i>10</i> , 2829. $[\text{Ni}(\text{H}_2\text{O})_6]\text{Ni}_{12}\text{C}_{72}\text{H}_{60}\text{N}_{48}\text{O}_{30} \cdot 2\text{H}_2\text{O}$                                              |
| 151980        | 2.026 Å          | Tiritiris, I.; Van, N.-D.; Schleid, T. <i>Z. Anorg. Allg. Chem.</i> <b>2004</b> , <i>630</i> , 1763. $[\text{Ni}(\text{H}_2\text{O})_6]\text{B}_{12}\text{H}_{12} \cdot 6\text{H}_2\text{O}$                                                                                                                          |
| XOXGID        | 2.026 Å          | Thuery, P.; Atoini, Y.; Harrowfield, J. <i>Cryst. Growth Des.</i> <b>2019</b> , <i>19</i> , 6611. $[\text{Ni}(\text{H}_2\text{O})_6]_2(\text{NH}_4)_6[\text{U}_4\text{C}_{60}\text{H}_{48}\text{O}_{32}]_2[\text{UC}_{50}\text{H}_{48}\text{O}_{32}]$                                                                 |
| 68364         | 2.029 Å          | Jouini, A.; Dabbabi, M. <i>Rev. Chim. Min.</i> <b>1986</b> , <i>23</i> , 776. $\text{Ag}_4[\text{Ni}(\text{H}_2\text{O})_6](\text{P}_3\text{O}_9)_2$                                                                                                                                                                  |
| FONDOC        | 2.029 Å          | Zhang, X.-L.; Ng, S. W. <i>Acta Crystallogr., Sect. E</i> <b>2005</b> , <i>61</i> , m1142. $[\text{Ni}(\text{H}_2\text{O})_6](\text{C}_6\text{H}_4\text{NO}_3)_2$                                                                                                                                                     |
| ESOHOK        | 2.030 Å          | Wei, M.-L.; Zhuang, P.-F.; Li, H.-H.; Yang, Y.-H. <i>Eur. J. Inorg. Chem.</i> <b>2011</b> , <i>50</i> , 1473. $[\text{Ni}(\text{H}_2\text{O})_6][\text{HMO}_{12}\text{O}_{40}\text{P}] \cdot 4(4\text{-HOOC-C}_5\text{H}_4\text{NO}) \cdot 4.5\text{H}_2\text{O}$                                                     |
| NOHHEZ        | 2.033 Å          | Liao, S.-Y.; Li, T.-H.; Tian, J.-L.; Yang, L.-Y.; Gu, W.; Liu, X. <i>RSC Adv.</i> <b>2014</b> , <i>4</i> , 29877. $[\text{Ni}(\text{H}_2\text{O})_6][\text{Ni}_2\text{C}_{22}\text{H}_{20}\text{N}_6\text{O}_{18}] \cdot 2\text{H}_2\text{O}$                                                                         |
| SUVCAN        | 2.033 Å          | Leonard, M. A.; Squattrito, P. J.; Dubey, S. N. <i>Acta Crystallogr., Sect. C</i> <b>1999</b> , <i>55</i> , 35. $[\text{Ni}(\text{H}_2\text{O})_6](\text{C}_8\text{H}_7\text{O}_3\text{S})_2$                                                                                                                         |
| 30284         | 2.035 Å          | Beevers, C. A.; Lipson, H. Z. <i>Kristallogr., Kristallgeom., Kristallphys., Kristallchem.</i> <b>1932</b> , <i>83</i> , 123. $[\text{Ni}(\text{H}_2\text{O})_6]\text{SO}_4$                                                                                                                                          |
| 404274        | 2.036 Å          | Halasyamani, P.; Willis, M. J.; Stern, C. L.; Poepelmeier, K. R. <i>Inorg. Chim. Acta</i> <b>1995</b> , <i>240</i> , 109. $[\text{Ni}(\text{H}_2\text{O})_6][\text{ZrF}_6]$                                                                                                                                           |

|          |         |                                                                                                                                                                                                                                                                                                                                                            |
|----------|---------|------------------------------------------------------------------------------------------------------------------------------------------------------------------------------------------------------------------------------------------------------------------------------------------------------------------------------------------------------------|
| LEZWOE   | 2.036 Å | Wei, M.-L.; Wang, X.-X.; Li, H.-H. <i>Wuji Huaxue Xuebao</i> <b>2012</b> , <i>28</i> , 2485.<br>(H <sub>3</sub> O)[Ni(H <sub>2</sub> O) <sub>6</sub> ][W <sub>12</sub> PO <sub>40</sub> ]·4(4-HOOC-C <sub>3</sub> HNO)·4H <sub>2</sub> O                                                                                                                   |
| MUWJUM   | 2.036 Å | Igoa, F.; Romero, M.; Peinado, G.; Castiglioni, J.; Gonzalez-Platas, J.; Faccio, R.; Suescun, L.; Kremer, C.; Torres, J. <i>CrystEngComm</i> <b>2020</b> , <i>22</i> , 5638. [Ni(H <sub>2</sub> O) <sub>6</sub> ][LuNi(C <sub>4</sub> H <sub>4</sub> O <sub>5</sub> ) <sub>3</sub> ] <sub>2</sub> ·2.52H <sub>2</sub> O                                    |
| QELXEK   | 2.036 Å | Sidorov, A. A.; Reshetnikov, A. V.; Deomidov, S. M.; Nefedov, S. E.; Eremenko, I. L. <i>Zh. Neorg. Khim.</i> <b>2000</b> , <i>45</i> , 793. [Ni(H <sub>2</sub> O) <sub>6</sub> ](CF <sub>3</sub> SO <sub>3</sub> ) <sub>2</sub>                                                                                                                            |
| 15878    | 2.037 Å | Grimes, N. W.; Kay, H. F.; Webb, M. W. <i>Acta Crystallogr.</i> <b>1963</b> , <i>16</i> , 823. (NH <sub>4</sub> ) <sub>2</sub> [Ni(H <sub>2</sub> O) <sub>6</sub> ](SO <sub>4</sub> ) <sub>2</sub>                                                                                                                                                         |
| DAWHOC   | 2.037 Å | Jana, D.; Kolli, H. K.; Das, S. K. <i>Inorg. Chem.</i> <b>2022</b> , <i>61</i> , 3816. (NH <sub>4</sub> ) <sub>2</sub> [Ni(H <sub>2</sub> O) <sub>6</sub> ][Mo <sub>2</sub> C <sub>2</sub> H <sub>5</sub> O <sub>8</sub> ] <sub>2</sub> ·2H <sub>2</sub> O                                                                                                 |
| QURCEL   | 2.037 Å | Escobal, J.; Pizarro, J. L.; Mesa, J. L.; Arriortua, M. I.; Rojo, T. <i>J. Solid State Chem.</i> <b>2000</b> , <i>154</i> , 460.<br>(C <sub>2</sub> H <sub>10</sub> N <sub>2</sub> )[Ni(H <sub>2</sub> O) <sub>6</sub> ](HPO <sub>4</sub> ) <sub>2</sub>                                                                                                   |
| 15980    | 2.038 Å | Beevers, C. A.; Schwartz, C. M. <i>Z. Kristallogr., Kristallgeom., Kristallphys., Kristallchem.</i> <b>1935</b> , <i>91</i> , 157; <i>Acta Crystallogr., Sect. B</i> <b>1968</b> , <i>24</i> , 1131. [Ni(H <sub>2</sub> O) <sub>6</sub> ][Cu <sub>2</sub> C <sub>12</sub> H <sub>12</sub> N <sub>2</sub> O <sub>12</sub> ] <sub>2</sub> ·2H <sub>2</sub> O |
| IHEQET   | 2.038 Å | Lin, H.-B.; Wang, Q.-H.; Zhou, Z.-H. <i>J. Inorg. Organomet. Polym. Mater.</i> <b>2014</b> , <i>24</i> , 819.<br>[Ni(H <sub>2</sub> O) <sub>6</sub> ]SO <sub>4</sub> ·H <sub>2</sub> O                                                                                                                                                                     |
| NODKUO   | 2.038 Å | Golovnev, N. N.; Molokeev, M. S.; Vereshchagin, S. N.; Atuchin, V. V.; Sidorenko, M. Y.; Dmitrushkov, M. S. <i>Polyhedron</i> <b>2014</b> , <i>70</i> , 71. [Ni(H <sub>2</sub> O) <sub>6</sub> ](C <sub>4</sub> H <sub>3</sub> N <sub>2</sub> O <sub>2</sub> S) <sub>2</sub> ·4H <sub>2</sub> O                                                            |
| QIXKUE   | 2.038 Å | Zhang, H.-K.; Gao, J.-S.; Jiang, X.-H.; Hou, G.-F. <i>Acta Crystallogr., Sect. E</i> <b>2008</b> , <i>64</i> , m585.<br>[Ni(H <sub>2</sub> O) <sub>6</sub> ](C <sub>11</sub> H <sub>7</sub> ClNO <sub>3</sub> S) <sub>2</sub> ·2H <sub>2</sub> O                                                                                                           |
| XEMGIF02 | 2.038 Å | Siegler, M. A.; Hao, X.; Parkin, S.; Brock, C. P. <i>Acta Crystallogr., Sect. B</i> <b>2011</b> , <i>67</i> , 486.<br>[Ni(H <sub>2</sub> O) <sub>6</sub> ](NO <sub>3</sub> ) <sub>2</sub> (C <sub>10</sub> H <sub>20</sub> O <sub>5</sub> )·2H <sub>2</sub> O                                                                                              |
| 84684    | 2.039 Å | Tepavitcharova, S.; Macicek, J.; Balarew, C.; Tzvetkova, C.; Angelova, O. <i>J. Solid State Chem.</i> <b>1997</b> , <i>129</i> , 200. (NH <sub>4</sub> )[Ni(H <sub>2</sub> O) <sub>6</sub> ]Br <sub>3</sub>                                                                                                                                                |
| 98957    | 2.039 Å | Altybaeva, D. T.; Imanakunov, B. I. <i>Izvestiya Natsional'noi Akademii Nauk Kyrgyzskoi Respubliki</i> <b>2003</b> , <i>33</i> . [Ni(H <sub>2</sub> O) <sub>6</sub> ]Cl <sub>2</sub> ·((CH <sub>2</sub> ) <sub>6</sub> N <sub>4</sub> ) <sub>2</sub> ·4H <sub>2</sub> O                                                                                    |
| ASAXAU   | 2.039 Å | Stein, I.; Ruschewitz, U. <i>Z. Naturforsch., Teil B</i> <b>2011</b> , <i>66</i> , 471. [Ni(H <sub>2</sub> O) <sub>6</sub> ](OOC <sub>2</sub> COOH) <sub>2</sub> ·2H <sub>2</sub> O                                                                                                                                                                        |
| JERNID   | 2.039 Å | Groh, S. E.; Riggs, P. J.; Baldacchini, C. J.; Rheingold, A. L. <i>Inorg. Chim. Acta</i> <b>1990</b> , <i>174</i> , 17.<br>[Ni(H <sub>2</sub> O) <sub>6</sub> ](C <sub>6</sub> H <sub>5</sub> O <sub>3</sub> S) <sub>2</sub>                                                                                                                               |
| 1835     | 2.040 Å | Black, W. H.; Griffith, E. A. H.; Robertson, B. E. <i>Acta Crystallogr., Sect. B</i> <b>1975</b> , <i>31</i> , 615.<br>[Ni(H <sub>2</sub> O) <sub>6</sub> ]S <sub>2</sub> O <sub>6</sub>                                                                                                                                                                   |
| 69045    | 2.040 Å | Moron, M. C.; Le Bail, A.; Pons, J. <i>J. Solid State Chem.</i> <b>1990</b> , <i>88</i> , 498.<br>(NH <sub>4</sub> ) <sub>0.5</sub> [Ni(H <sub>2</sub> O) <sub>6</sub> ][Cr(NH <sub>3</sub> ) <sub>6</sub> ]Cl <sub>5.5</sub>                                                                                                                              |
| PAHXIF   | 2.040 Å | Jessen, S. M.; Kupperts, H.; Luehrs, D. C. <i>Z. Naturforsch., Teil B</i> <b>1992</b> , <i>47</i> , 1141. [Ni(H <sub>2</sub> O) <sub>6</sub> ](C <sub>10</sub> H <sub>4</sub> O <sub>8</sub> )                                                                                                                                                             |

|          |         |                                                                                                                                                                                                                                                                                                                                                                                                    |
|----------|---------|----------------------------------------------------------------------------------------------------------------------------------------------------------------------------------------------------------------------------------------------------------------------------------------------------------------------------------------------------------------------------------------------------|
| SOFWIU   | 2.040 Å | Tai, X.-S.; Xu, J.; Feng, Y.-M.; Liang, Z.-P. <i>Acta Crystallogr., Sect. E</i> <b>2008</b> , <i>64</i> , m893.<br>[Ni(H <sub>2</sub> O) <sub>6</sub> ](C <sub>13</sub> H <sub>10</sub> NO <sub>4</sub> S) <sub>2</sub>                                                                                                                                                                            |
| 54212    | 2.041 Å | Zhu, H.-L.; You, Z.-I.; Qu, Y.; Liu, W.-S.; Tan, M.-Y.; Ma, J.-L. <i>Acta Crystallogr., Sect. E</i> <b>2003</b> , <i>59</i> , m924. [Ni(H <sub>2</sub> O) <sub>6</sub> ]Cl <sub>2</sub> ·2C <sub>6</sub> H <sub>12</sub> N <sub>4</sub> ·4H <sub>2</sub> O                                                                                                                                         |
| 760216   | 2.041 Å | Lacroix, M. R.; Bukovsky, E. V.; Lozinšek, M.; Folsom, T. C.; Newell, B. S.; Yong, L.; Peryshkov, D. V.; Strauss, S. H. <i>Inorg. Chem.</i> <b>2018</b> , <i>57</i> , 14983. [Ni(H <sub>2</sub> O) <sub>6</sub> ]B <sub>12</sub> F <sub>12</sub>                                                                                                                                                   |
| TAKHIX   | 2.041 Å | Kokunov, Y. V.; Khmelevskaya, L.V.; Gorbunova, Y. E.; Mikhailov, Y. N. <i>Zh. Neorg. Khim.</i> <b>2002</b> , <i>47</i> , 1600. [Ni(H <sub>2</sub> O) <sub>6</sub> ]Cl <sub>2</sub> ·2C <sub>6</sub> H <sub>12</sub> N <sub>4</sub> ·4H <sub>2</sub> O                                                                                                                                              |
| TAKHIX03 | 2.041 Å | Agwara, M O.; Ndifon, P. T.; Yufanyi, M. D.; Tendo, J. N. F.; Atamba, M. A.; Awawou, P. G.; Galindo, A.; Alvarez, E. <i>Rasayan J, Chem.</i> <b>2010</b> , <i>3</i> , 207. [Ni(H <sub>2</sub> O) <sub>6</sub> ]Cl <sub>2</sub> ·2C <sub>6</sub> H <sub>12</sub> N <sub>4</sub> ·4H <sub>2</sub> O                                                                                                  |
| TAMBIW   | 2.041 Å | Matsia, S.; Kaoulla, A.; Menelaou, M.; Hatzidimitriou, A.; Papadopoulos, T.; Reimann, M. K.; Pottgen, R.; Salifoglou, A. <i>Polyhedron</i> <b>2021</b> , <i>212</i> , 115577. [Ni(H <sub>2</sub> O) <sub>6</sub> ][Ni(N <sub>2</sub> C <sub>12</sub> H <sub>8</sub> ) <sub>3</sub> ] <sub>2</sub> (NO <sub>3</sub> ) <sub>6</sub> ·4.5CH <sub>3</sub> CN·H <sub>2</sub> O                          |
| YIRWEE   | 2.041 Å | Lacroix, M. R.; Bukovsky, E. V.; Lozinsek, M.; Folsom, T. C.; Newell, B. S.; Liu, Y.; Peryshkov, D. V.; Strauss, S. H. <i>Inorg. Chem.</i> <b>2018</b> , <i>57</i> , 14983. [Ni(H <sub>2</sub> O) <sub>6</sub> ]B <sub>12</sub> F <sub>12</sub>                                                                                                                                                    |
| 433350   | 2.042 Å | Kleeberg, F. M.; Dinnebier, R. E.; Schleid, T. <i>Inorg. Chim. Acta</i> <b>2017</b> , <i>147</i> . [Ni(H <sub>2</sub> O) <sub>6</sub> ]B <sub>12</sub> Cl <sub>12</sub> ·6H <sub>2</sub> O                                                                                                                                                                                                         |
| BAVYUS   | 2.042 Å | Knuuttila, P. <i>Inorg. Chim Acta</i> <b>1981</b> , <i>52</i> , 141. [Ni(H <sub>2</sub> O) <sub>6</sub> ](C <sub>6</sub> H <sub>4</sub> NO <sub>3</sub> ) <sub>2</sub>                                                                                                                                                                                                                             |
| GOLZIT   | 2.042 Å | Kleeberg, F. M.; Dinnebier, R. E.; Schleid, T. <i>Inorg. Chim. Acta.</i> <b>2017</b> , <i>467</i> , 147.<br>[Ni(H <sub>2</sub> O) <sub>6</sub> ]B <sub>12</sub> Cl <sub>12</sub> ·6H <sub>2</sub> O                                                                                                                                                                                                |
| GOPJUS   | 2.042 Å | Miao, H.; Wan, H.-X.; Liu, M.; Zhang, Y.; Xu, X.; Ju, W.-W.; Zhu, D.-R.; Xu, Y. <i>J. Mater. Chem. C</i> <b>2014</b> , <i>2</i> , 6554. [Ni(H <sub>2</sub> O) <sub>6</sub> ][C <sub>3</sub> H <sub>5</sub> N <sub>2</sub> ] <sub>4</sub> [Mo <sub>16</sub> C <sub>76</sub> H <sub>102</sub> N <sub>18</sub> O <sub>126</sub> P <sub>22</sub> ]·2C <sub>5</sub> H <sub>5</sub> N·11H <sub>2</sub> O |
| NAFYAU   | 2.042 Å | Faus, J.; Lloret, F.; Julve, M.; Clemente-Juan, J. M.; Munoz, M. C.; Solans, X.; Font-Bardia, M. <i>Angew. Chem., Int. Ed. Engl.</i> <b>1996</b> , <i>35</i> , 1485. K <sub>4</sub> [Ni(H <sub>2</sub> O) <sub>6</sub> ][Ni <sub>8</sub> C <sub>48</sub> H <sub>24</sub> O <sub>48</sub> ]·20H <sub>2</sub> O                                                                                      |
| NQXSNI   | 2.042 Å | Korvenranta, J.; Saarinen, H.; Nasakkala, E. <i>Finn. Chem. Lett.</i> <b>1977</b> , <i>61</i> . [Ni(H <sub>2</sub> O) <sub>6</sub> ](C <sub>10</sub> H <sub>6</sub> NO <sub>5</sub> S) <sub>2</sub> ·4H <sub>2</sub> O                                                                                                                                                                             |
| QUKQUI02 | 2.042 Å | Mondragon, A. Flores-Alamo, M.; Martinez-Alanis, P. R.; Aullon, G.; Ugalde-Saldivar, V. M.; Castillo, I. <i>Inorg. Chem.</i> <b>2015</b> , <i>54</i> , 619. [Ni(H <sub>2</sub> O) <sub>6</sub> ]( <i>p</i> -C <sub>6</sub> H <sub>5</sub> SO <sub>3</sub> ) <sub>2</sub>                                                                                                                           |
| UMOWOJ   | 2.042 Å | Shi, Z.; Li, L.; Niu, S.; Jin, J.; Chi, Y.; Zhang, L.; Liu, J.; Xing, Y. <i>Inorg. Chim. Acta</i> <b>2011</b> , <i>366</i> , 101.<br>[Ni(H <sub>2</sub> O) <sub>6</sub> ][Ni(H <sub>2</sub> O) <sub>2</sub> (C <sub>12</sub> H <sub>8</sub> N <sub>2</sub> ) <sub>2</sub> ] <sub>2</sub> ( <i>l</i> , <i>3</i> , <i>5</i> -(OOC)C <sub>6</sub> H <sub>3</sub> ) <sub>2</sub> ·18H <sub>2</sub> O   |
| TAKHIX02 | 2.042 Å | Banerjee, S.; Choudhury, A. R.; Row, T. N. G.; Chaudhuri, S.; Ghosh, A. <i>Polyhedron</i> <b>2007</b> , <i>26</i> , 24.<br>[Ni(H <sub>2</sub> O) <sub>6</sub> ]Cl <sub>2</sub> ·2C <sub>6</sub> H <sub>12</sub> N <sub>4</sub> ·4H <sub>2</sub> O                                                                                                                                                  |
| VEMSAK   | 2.042 Å | Oh, I.-W.; Park, G.; Park, S.-H. <i>Z. Kristallogr.-New Cryst Struct.</i> <b>2017</b> , <i>232</i> , 803.<br>[Ni(H <sub>2</sub> O) <sub>6</sub> ](C <sub>14</sub> H <sub>14</sub> N <sub>3</sub> O <sub>3</sub> S) <sub>2</sub>                                                                                                                                                                    |

|          |         |                                                                                                                                                                                                                                                                                                                                                                                                               |
|----------|---------|---------------------------------------------------------------------------------------------------------------------------------------------------------------------------------------------------------------------------------------------------------------------------------------------------------------------------------------------------------------------------------------------------------------|
| CAXCUD   | 2.043 Å | Chang, Q.; Meng, X.; Ruan, W.; Feng, Y.; Li, R.; Zhu, J.; Ding, Y.; Lv, H.; Wang, W.; Chen, G.; Fang, X. <i>Angew. Chem, Int. Ed.</i> <b>2022</b> , <i>61</i> , e202117637. 22<br>(NH <sub>4</sub> ) <sub>22</sub> Na <sub>8</sub> [Ni(H <sub>2</sub> O) <sub>6</sub> ][Ni <sub>16</sub> C <sub>36</sub> H <sub>24</sub> O <sub>178</sub> Si <sub>4</sub> W <sub>36</sub> ] <sub>2</sub> ·155H <sub>2</sub> O |
| KIXLIM   | 2.043 Å | Pech, R.; Pickardt, J. <i>Acta Crystallogr., Sect. C</i> <b>1991</b> , <i>47</i> , 1731. [Ni(H <sub>2</sub> O) <sub>6</sub> ](C <sub>9</sub> H <sub>5</sub> O <sub>6</sub> ) <sub>2</sub> ·4H <sub>2</sub> O                                                                                                                                                                                                  |
| LALPIY   | 2.043 Å | Chew Hee Ng, C. H.; Teoh, S. G.; Ng, S. W. <i>Malaysian J. Chem.</i> <b>2004</b> , <i>4</i> , 20.<br>[Ni(H <sub>2</sub> O) <sub>6</sub> ](N(CN) <sub>2</sub> ) <sub>2</sub> ·2C <sub>6</sub> H <sub>12</sub> N <sub>4</sub> ·2H <sub>2</sub> O                                                                                                                                                                |
| POGQOU   | 2.043 Å | Mohan, M.; Rajak, S.; Tremblay, A. A.; Maris, T.; Duong, A. <i>Dalton Trans.</i> <b>2019</b> , <i>48</i> , 7006.<br>[Ni(H <sub>2</sub> O) <sub>6</sub> ][NiC <sub>12</sub> H <sub>10</sub> N <sub>14</sub> O <sub>10</sub> ]                                                                                                                                                                                  |
| YELSUG   | 2.043 Å | Li, W.-W.; Zhang, Z.-T. <i>Jiegou Huaxue</i> <b>2018</b> , <i>37</i> , 97. [Ni(H <sub>2</sub> O) <sub>6</sub> ](C <sub>16</sub> H <sub>11</sub> O <sub>7</sub> S) <sub>2</sub> ·4H <sub>2</sub> O                                                                                                                                                                                                             |
| 26339    | 2.044 Å | Leclaire, A.; Borel, M. M. <i>Acta Crystallogr., Sect. B</i> <b>1980</b> , <i>36</i> , 3088. [Ni(H <sub>2</sub> O) <sub>6</sub> ][Cd <sub>2</sub> Cl <sub>6</sub> ] <sub>2</sub> ·6H <sub>2</sub> O                                                                                                                                                                                                           |
| 63450    | 2.044 Å | Hoskins, B. F.; Linden, A. <i>Aust. J. Chem.</i> <b>1987</b> , <i>40</i> , 565. [Ni(H <sub>2</sub> O) <sub>6</sub> ][GeF <sub>6</sub> ]                                                                                                                                                                                                                                                                       |
| 281216   | 2.044 Å | Kuratieva, N. V.; Naumova, M. I.; Naumov, D. Yu.; Podberezkaya, N. V. <i>Acta Crystallogr., Sect. C</i> <b>2003</b> , <i>59</i> , 1. [Ni(H <sub>2</sub> O) <sub>6</sub> ](H <sub>2</sub> PO <sub>2</sub> ) <sub>2</sub>                                                                                                                                                                                       |
| 262614   | 2.044 Å | Donakowski, M. D.; Gautier, R.; Jeongho, Y.; Moore, D. T.; Nino, J. C.; Shiv Halasyamani, P.; Poepelmeier, K. R. <i>J. Am. Chem. Soc.</i> <b>2012</b> , <i>134</i> , 7679. [Ni(H <sub>2</sub> O) <sub>6</sub> ][VOF <sub>4</sub> (H <sub>2</sub> O)]                                                                                                                                                          |
| 404273   | 2.044 Å | Halasyamani, P.; Willis, M. J.; Stern, C. L.; Poepelmeier, K. R. <i>Inorg. Chim. Acta</i> <b>1995</b> , <i>240</i> , 109.<br>[Ni(H <sub>2</sub> O) <sub>6</sub> ][TiF <sub>6</sub> ]                                                                                                                                                                                                                          |
| BAVYUS01 | 2.044 Å | Baruah, J. B. CCDC deposition number 749992, <b>2016</b> . [Ni(H <sub>2</sub> O) <sub>6</sub> ](C <sub>6</sub> H <sub>4</sub> NO <sub>3</sub> ) <sub>2</sub>                                                                                                                                                                                                                                                  |
| HEYBET   | 2.044 Å | Junk, P. C.; Moubaraki, B.; Murray, K. S. <i>Polyhedron</i> <b>2007</b> , <i>26</i> , 237.<br>[Ni(H <sub>2</sub> O) <sub>6</sub> ]Cu <sub>3</sub> (H <sub>2</sub> O) <sub>2</sub> Cl <sub>8</sub> ·2C <sub>10</sub> H <sub>20</sub> O <sub>5</sub> ·2H <sub>2</sub> O                                                                                                                                         |
| QUKQUI   | 2.044 Å | Fewings, K. R.; Junk, P. C.; Georganopoulou, D.; Prince, P. D.; Steed, J. W. <i>Polyhedron</i> <b>2001</b> , <i>20</i> , 643.<br>[Ni(H <sub>2</sub> O) <sub>6</sub> ](C <sub>7</sub> H <sub>7</sub> N <sub>4</sub> SO <sub>3</sub> ) <sub>2</sub>                                                                                                                                                             |
| UGUDIJ01 | 2.044 Å | Ma, J.-L.; Qiu, X.-Y.; Shao, S.-C.; Yang, S.; Sun, L.; Zhu, H.-L. <i>Z. Kristallogr.-New Cryst Struct.</i> <b>2003</b> , <i>218</i> , 501. [Ni(H <sub>2</sub> O) <sub>6</sub> ](NO <sub>3</sub> ) <sub>2</sub> ·2(C <sub>6</sub> H <sub>12</sub> N <sub>4</sub> )·4H <sub>2</sub> O                                                                                                                           |
| 75985    | 2.045 Å | Mikenda, W.; Pertlik, F.; Steinboeck, S. <i>Monatsh. Chem. Teile Wissenschaften</i> <b>1995</b> , <i>126</i> , 61.<br>[Ni(H <sub>2</sub> O) <sub>6</sub> ][SnF <sub>6</sub> ]                                                                                                                                                                                                                                 |
| 249152   | 2.045 Å | Rafizadeh, M.; Amani, V. <i>Acta Crystallogr., Sect. E</i> <b>2006</b> , <i>62</i> , m1776. [Ni(H <sub>2</sub> O) <sub>6</sub> ](O <sub>2</sub> P(OCH <sub>3</sub> ) <sub>2</sub> ) <sub>2</sub>                                                                                                                                                                                                              |
| 404275   | 2.045 Å | Halasyamani, P.; Willis, M. J.; Stern, C. L.; Poepelmeier, K. R. <i>Inorg. Chim. Acta</i> <b>1995</b> , <i>240</i> , 109.<br>[Ni(H <sub>2</sub> O) <sub>6</sub> ][HfF <sub>6</sub> ]                                                                                                                                                                                                                          |
| BIZJEA   | 2.045 Å | Guo, M.-L.; Wang, F.-Q.; Zang, H.-J. <i>Acta Crystallogr., Sect. E</i> <b>2008</b> , <i>64</i> , m198.<br>[Ni(H <sub>2</sub> O) <sub>6</sub> ](C <sub>6</sub> H <sub>10</sub> N <sub>2</sub> O <sub>6</sub> PS) <sub>2</sub> ·6H <sub>2</sub> O                                                                                                                                                               |
| ENIYUW   | 2.045 Å | Stavila, V.; Bulimestru, I.; Gulea, A.; Colson, A. C.; Whitmire, K. H. <i>Acta Crystallogr., Sect. C</i> <b>2011</b> , <i>67</i> , m65. [Ni(H <sub>2</sub> O) <sub>6</sub> ][Bi <sub>2</sub> C <sub>28</sub> H <sub>12</sub> N <sub>4</sub> O <sub>16</sub> ] <sub>2</sub> ·2H <sub>2</sub> O                                                                                                                 |



|          |         |                                                                                                                                                                                                                                                                                                                                                                                         |
|----------|---------|-----------------------------------------------------------------------------------------------------------------------------------------------------------------------------------------------------------------------------------------------------------------------------------------------------------------------------------------------------------------------------------------|
| JINPOO   | 2.045 Å | Xu, H.; Feng, L.; Huang, W.; Wang, Q.; Zhou, H. <i>New J. Chem.</i> <b>2018</b> , <i>43</i> , 807.<br>[Ni(H <sub>2</sub> O) <sub>6</sub> ][NiC <sub>9</sub> H <sub>15</sub> FNO <sub>8</sub> P <sub>2</sub> ] <sub>2</sub> ·4H <sub>2</sub> O                                                                                                                                           |
| RELJIE   | 2.045 Å | Caoa, M.; Lin, J.; Lu, J.; You, Y.; Liu, T.; Cao, R. <i>J. Hazard. Mater.</i> <b>2011</b> , <i>186</i> , 948.<br>[Ni(H <sub>2</sub> O) <sub>6</sub> ][W <sub>12</sub> SiKHO <sub>40</sub> ]·C <sub>36</sub> H <sub>36</sub> N <sub>24</sub> O <sub>12</sub> ·7H <sub>2</sub> O                                                                                                          |
| TOKBUR   | 2.045 Å | Chagas, L. H.; Janczak, J.; Gomes, F. S.; Fernandes, N. G.; de Oliveira, L. F. C.; Diniz, R. <i>J. Mol. Struct.</i> <b>2008</b> , <i>892</i> , 305. [Ni(H <sub>2</sub> O) <sub>6</sub> ](C <sub>7</sub> H <sub>5</sub> N <sub>5</sub> O) <sub>2</sub>                                                                                                                                   |
| XATMEM   | 2.045 Å | Kaabi, K.; Zeller, M.; Ferretti, V.; Silva, P. S. P.; Nasr, C. B. <i>Inorg. Chim. Acta</i> <b>2012</b> , <i>388</i> , 52.<br>[Ni(H <sub>2</sub> O) <sub>6</sub> ][Ni((C <sub>10</sub> H <sub>14</sub> N <sub>6</sub> O <sub>2</sub> ) <sub>2</sub> )(ClO <sub>4</sub> ) <sub>4</sub> ]·5H <sub>2</sub> O                                                                                |
| 281584   | 2.046 Å | Dagur, P.; Chopra, D.; Prakash, A.; Guru Row, T. N.; Hegde, M. S. <i>Acta Crystallogr., Sect. E</i> <b>2003</b> , <i>59</i> , m1129. [Ni(H <sub>2</sub> O) <sub>6</sub> ]Cr <sub>2</sub> O <sub>7</sub> ((CH <sub>2</sub> ) <sub>6</sub> N <sub>4</sub> ) <sub>2</sub> ·H <sub>2</sub> O                                                                                                |
| AYABUX   | 2.046 Å | Guo, Q.-L.; Zhu, W.-X.; Ma, S.-L.; Dong, S.-J.; Xu, M.-Q. <i>Polyhedron</i> <b>2004</b> , <i>23</i> , 1461.<br>[Ni(H <sub>2</sub> O) <sub>6</sub> ](C <sub>12</sub> H <sub>28</sub> N <sub>2</sub> O <sub>4</sub> )[NiC <sub>24</sub> H <sub>18</sub> O <sub>19</sub> S <sub>8</sub> ] <sub>2</sub> ·2C <sub>12</sub> H <sub>26</sub> N <sub>2</sub> O <sub>4</sub> ·14H <sub>2</sub> O |
| BUNMOP   | 2.046 Å | Liang, L.-L.; Zhang, R.-L.; Zhao, J.-S. <i>Inorg. Chem.</i> <b>2020</b> , <i>59</i> , 7980.<br>(H <sub>3</sub> O)[Ni(H <sub>2</sub> O) <sub>6</sub> ] <sub>2</sub> [UC <sub>12</sub> H <sub>12</sub> N <sub>3</sub> O <sub>11</sub> ] <sub>3</sub> ·6H <sub>2</sub> O                                                                                                                   |
| HEKDIK   | 2.046 Å | Steed, J. W.; McCool, B. J.; Junk, P. C. <i>J. Chem. Soc., Dalton Trans.</i> <b>1998</b> , 3417.<br>[Ni(H <sub>2</sub> O) <sub>6</sub> ](ClO <sub>4</sub> ) <sub>2</sub> ·C <sub>12</sub> H <sub>24</sub> O <sub>6</sub>                                                                                                                                                                |
| FEHWUL   | 2.046 Å | Chikunov, I. E.; Kravchenko, A. N.; Belyakov, P. A.; Lyssenko, K. A.; Baranov, V. V.; Lebedev, O. V.; Makhova, N. N. <i>Mendeleev Commun.</i> <b>2004</b> , 253. [Ni(H <sub>2</sub> O) <sub>6</sub> ](C <sub>9</sub> H <sub>13</sub> N <sub>4</sub> O <sub>4</sub> S) <sub>2</sub> ·4H <sub>2</sub> O                                                                                   |
| RORQUM   | 2.046 Å | Thuery, P.; Harrowfield, J. <i>Cryst. Growth Des.</i> <b>2014</b> , <i>14</i> , 4214. [Ni(H <sub>2</sub> O) <sub>6</sub> ][UC <sub>9</sub> H <sub>9</sub> O <sub>8</sub> ] <sub>2</sub> ·2H <sub>2</sub> O                                                                                                                                                                              |
| UGUDIJ03 | 2.046 Å | Singh, G.; Baranwal, B. P.; Kapoor, I. P. S.; Kumar, D.; Singh, C. P.; Frohlich, R. <i>Therm. Anal. Calorimetry</i> <b>2008</b> , <i>91</i> , 971. [Ni(H <sub>2</sub> O) <sub>6</sub> ](NO <sub>3</sub> ) <sub>2</sub> ·2(C <sub>6</sub> H <sub>12</sub> N <sub>4</sub> )·4H <sub>2</sub> O                                                                                             |
| VELQEJ   | 2.046 Å | Rafizadeh, M.; Amani, V. <i>Acta Crystallogr., Sect. E</i> <b>2006</b> , <i>62</i> , m1776. [Ni(H <sub>2</sub> O) <sub>6</sub> ]((CH <sub>3</sub> O) <sub>2</sub> PO <sub>2</sub> )                                                                                                                                                                                                     |
| 34758    | 2.047 Å | Ray, S.; Zalkin, A.; Templeton, D. H. <i>Acta Crystallogr., Sect. B</i> <b>1973</b> , <i>29</i> , 2741. [Ni(H <sub>2</sub> O) <sub>6</sub> ]SiF <sub>6</sub>                                                                                                                                                                                                                            |
| 65047    | 2.047 Å | Gallucci, J. C.; Gerkin, R. E.; Reppart, W. J. <i>Acta Crystallogr., Sect. C</i> <b>1988</b> , <i>44</i> , 1345.<br>[Ni(H <sub>2</sub> O) <sub>6</sub> ](BrO <sub>4</sub> ) <sub>2</sub>                                                                                                                                                                                                |
| 84568    | 2.047 Å | Ptasiewicz-Bak, H.; Olovsson, I.; McIntyre, G. J. <i>Acta Crystallogr., Sect. B</i> <b>1997</b> , <i>53</i> , 325.<br>[Ni(H <sub>2</sub> O) <sub>6</sub> ]SO <sub>4</sub> ·H <sub>2</sub> O                                                                                                                                                                                             |
| 110016   | 2.047 Å | Maolin, H.; Mingde, Y.; Weng, N. S. <i>Acta Crystallogr., Sect. E</i> <b>2002</b> , <i>58</i> , m486.<br>[Ni(H <sub>2</sub> O) <sub>6</sub> ](NO <sub>3</sub> ) <sub>2</sub> ·2(CH <sub>2</sub> ) <sub>6</sub> N <sub>4</sub> ·4H <sub>2</sub> O                                                                                                                                        |
| 280960   | 2.047 Å | Sun, Z.-G.; Long, L.-S.; Ren, Y.-P.; Huang, R.-B.; Zheng, L.-S.; Ng, S.W. <i>Acta Crystallogr., Sect. E</i> <b>2002</b> , <i>58</i> , 34. [Ni(H <sub>2</sub> O) <sub>6</sub> ] <sub>2</sub> [Na <sub>4</sub> (H <sub>2</sub> O) <sub>14</sub> ] <sub>2</sub> [V <sub>10</sub> O <sub>28</sub> ]·3H <sub>2</sub> O                                                                       |
| DEDZEV   | 2.047 Å | Zheng, J.; Ma, Y.; Yang, X.; Ma, P. <i>RSC Adv.</i> <b>2022</b> , <i>12</i> , 18736. [Ni(H <sub>2</sub> O) <sub>6</sub> ] <sub>2</sub> (ClO <sub>4</sub> ) <sub>4</sub> ·C <sub>54</sub> H <sub>60</sub> N <sub>24</sub> O <sub>12</sub> ·H <sub>2</sub> O                                                                                                                              |

|          |         |                                                                                                                                                                                                                                                                                |
|----------|---------|--------------------------------------------------------------------------------------------------------------------------------------------------------------------------------------------------------------------------------------------------------------------------------|
| EGOFUE   | 2.047 Å | Black, D. T.; Kennedy, A. R.; Lobato, K. M. <i>Acta Crystallogr., Sect. C</i> <b>2019</b> , 75, 633.<br>[Ni(H <sub>2</sub> O) <sub>6</sub> ](C <sub>18</sub> H <sub>14</sub> N <sub>2</sub> O <sub>7</sub> S <sub>2</sub> )·((CH <sub>3</sub> ) <sub>2</sub> NCHO              |
| FEGLUY   | 2.047 Å | Brach, I.; Roziere, Anselment, B.; Peters, K. <i>Acta Crystallogr., Sect. C</i> <b>1987</b> , 43, 458.<br>[Ni(H <sub>2</sub> O) <sub>6</sub> ](C <sub>4</sub> HO <sub>4</sub> ) <sub>2</sub> ·2H <sub>2</sub> O                                                                |
| FONDOC01 | 2.047 Å | Perez-Aguirre, R.; Perez-Yanez, S.; Beobide, G.; Castillo, O.; Gutierrez-Zorrilla, J. M.; Luque, L. <i>Acta Crystallogr., Sect. E</i> <b>2015</b> , 71, m238. [Ni(H <sub>2</sub> O) <sub>6</sub> ](C <sub>6</sub> H <sub>4</sub> NO <sub>3</sub> ) <sub>2</sub>                |
| IYUKOC   | 2.047 Å | Zou, Y.; Liu, W.-L.; Xie, J.-L.; Ni, C.-L.; Ni, Z.-P.; Li, Y.-Z.; Meng, Q.-J.; Yao, Y.-G. <i>J. Coord. Chem.</i> <b>2004</b> , 57, 381. [Ni(H <sub>2</sub> O) <sub>6</sub> ][CuC <sub>11</sub> H <sub>9</sub> N <sub>2</sub> O <sub>4</sub> ] <sub>2</sub> ·2H <sub>2</sub> O  |
| KAGNAI   | 2.047 Å | Ma, J.-F.; Yang, J.; Liu, J.-F. <i>Acta Crystallogr., Sect. E</i> <b>2003</b> , 59, m483. [Ni(H <sub>2</sub> O) <sub>6</sub> ](C <sub>7</sub> H <sub>5</sub> O <sub>6</sub> S) <sub>2</sub> ·4H <sub>2</sub> O                                                                 |
| KEJVOO   | 2.047 Å | Bettinger, R. T.; Squattrito, P. J.; Aulakh, D.; Gianopoulos, C. G. <i>Acta Crystallogr., Sect. E</i> <b>2022</b> , 78, 961. [Ni(H <sub>2</sub> O) <sub>6</sub> ]( <i>m</i> -C <sub>6</sub> H <sub>4</sub> COOH(SO <sub>3</sub> )) <sub>2</sub> ·2H <sub>2</sub> O             |
| QUKQUI01 | 2.047 Å | Batsanov, A. S.; Howard, J. A. K.; Moore, N. S.; Kilner, M. <i>Acta Crystallogr., Sect. E</i> <b>2001</b> , 57, m485.<br>[Ni(H <sub>2</sub> O) <sub>6</sub> ](C <sub>7</sub> H <sub>7</sub> N <sub>4</sub> SO <sub>3</sub> ) <sub>2</sub>                                      |
| TUJROG   | 2.047 Å | Xiao, W.; Zhang, N.; Deng, S.; Mao, X.; Chen, C. <i>Z. Anorg. Allg. Chem.</i> <b>2009</b> , 635, 1511.<br>[Ni(H <sub>2</sub> O) <sub>6</sub> ]C <sub>16</sub> H <sub>8</sub> O <sub>8</sub>                                                                                    |
| UGUDIJ   | 2.047 Å | Mao-Lin Hu; Ming-De Ye; Ng, S. W. <i>Acta Crystallogr., Sect. E</i> <b>2002</b> , 58, m486.<br>[Ni(H <sub>2</sub> O) <sub>6</sub> ](NO <sub>3</sub> ) <sub>2</sub> ·2(C <sub>6</sub> H <sub>12</sub> N <sub>4</sub> )·4H <sub>2</sub> O                                        |
| UJEDOD01 | 2.047 Å | Liu, C.-B.; Wen, H.-L.; Gong, Y.-N.; Liu, X.-M.; Tan, S.-S. <i>Z. Anorg. Allg. Chem.</i> <b>2011</b> , 637, 122.<br>[Ni(H <sub>2</sub> O) <sub>6</sub> ][Ni(H <sub>2</sub> O) <sub>3</sub> ](C <sub>12</sub> H <sub>10</sub> NO <sub>8</sub> ) <sub>3</sub> ·6H <sub>2</sub> O |
| UVUVOY   | 2.047 Å | Kathiravan, P.; Balakrishnan, T.; Srinath, C.; Ramamurthi, K.; Thamotharan, S. <i>Karbala Int. J. Modern Sci.</i> <b>2016</b> , 2, 226. [Ni(H <sub>2</sub> O) <sub>6</sub> ]SO <sub>4</sub>                                                                                    |
| WABMER   | 2.047 Å | Kosnic, E. J.; McClymont, E. L.; Hodder, R. A.; Squattrito, P. J. <i>Inorg. Chim. Acta</i> <b>1992</b> , 201, 143.<br>[Ni(H <sub>2</sub> O) <sub>6</sub> ]( <i>l</i> -O <sub>3</sub> SC <sub>6</sub> H <sub>4</sub> OH) <sub>2</sub> ·2H <sub>2</sub> O                        |
| XEMGIF01 | 2.047 Å | Siegler, M. A.; Parkin, S.; Selegue, J. P.; Brock, C. P. <i>Acta Crystallogr., Sect. E</i> <b>2008</b> , 64, 725.<br>[Ni(H <sub>2</sub> O) <sub>6</sub> ](NO <sub>3</sub> ) <sub>2</sub> (C <sub>10</sub> H <sub>20</sub> O <sub>5</sub> )·2H <sub>2</sub> O                   |
| 65103    | 2.048 Å | Gerkin, R. E.; Reppart, W. J. <i>Acta Crystallogr., Sect. C</i> <b>1988</b> , 44, 1486. [Ni(H <sub>2</sub> O) <sub>6</sub> ]SO <sub>4</sub>                                                                                                                                    |
| 242128   | 2.048 Å | Klepov, V. V.; Serezhkina, L. B.; Serezhkin, V. N.; Alekseev, E. V. <i>J. Solid State Chem.</i> <b>2016</b> , 244, 100.<br>Na[Ni(H <sub>2</sub> O) <sub>6</sub> ][UO <sub>2</sub> (CH <sub>3</sub> COO) <sub>3</sub> ] <sub>3</sub>                                            |
| GUHMOO   | 2.048 Å | Liu, J.; Lu, Y.; Li, J.; Lu, W. <i>Dyes Pigm.</i> <b>2020</b> , 177, 108266.<br>[Ni(H <sub>2</sub> O) <sub>6</sub> ][NiC <sub>26</sub> H <sub>28</sub> N <sub>4</sub> O <sub>6</sub> ](C <sub>10</sub> H <sub>4</sub> O <sub>8</sub> ) <sub>2</sub> ·2H <sub>2</sub> O         |
| LOVKUE   | 2.048 Å | Yin, H.-L.; Zhou, T.-N.; Ao, Y.-Y. <i>Jiegou Huaxue</i> <b>2015</b> , 34, 1908. [Ni(H <sub>2</sub> O) <sub>6</sub> ][Mo <sub>2</sub> C <sub>10</sub> H <sub>2</sub> O <sub>10</sub> S <sub>2</sub> ]·2LH <sub>2</sub> O                                                        |
| XEMGIF   | 2.048 Å | Steed, J. W.; Sakellariou, E.; Junk, P. C.; Smith, M. K. <i>Chem. Eur. J.</i> <b>2001</b> , 7, 1240.<br>[Ni(H <sub>2</sub> O) <sub>6</sub> ](NO <sub>3</sub> ) <sub>2</sub> (C <sub>10</sub> H <sub>20</sub> O <sub>5</sub> )·2H <sub>2</sub> O                                |

|             |         |                                                                                                                                                                                                                                                                                                                                                   |
|-------------|---------|---------------------------------------------------------------------------------------------------------------------------------------------------------------------------------------------------------------------------------------------------------------------------------------------------------------------------------------------------|
| YOSCUF      | 2.048 Å | Qiu, L.-G.; Gu, L.-N.; Hu, G.; Zhang, L.-D. <i>J. Solid State Chem.</i> <b>2009</b> , <i>182</i> , 502. [Ni(H <sub>2</sub> O) <sub>6</sub> ][Ni(H <sub>2</sub> O) <sub>2</sub> (C <sub>12</sub> H <sub>8</sub> N <sub>2</sub> ) <sub>2</sub> ](1,3,5-(OOC) <sub>3</sub> C <sub>6</sub> H <sub>3</sub> ) <sub>2</sub> ·22H <sub>2</sub> O          |
| 89697-89699 | 2.049 Å | Rousseau, B.; Maes, S. T.; Lenstra, A. T. H. <i>Acta Crystallogr., Sect. A</i> <b>2000</b> , <i>56</i> , 300. [Ni(H <sub>2</sub> O) <sub>6</sub> ]SO <sub>4</sub>                                                                                                                                                                                 |
| DEZPEF      | 2.049 Å | Belosevic, S.; Vasojevic, M. M.; Jeremic, M. S.; Meetsma, A.; Matovic, Z. D. <i>J. Coord. Chem.</i> <b>2013</b> , <i>66</i> , 1730. [Ni(H <sub>2</sub> O) <sub>6</sub> ][NiC <sub>11</sub> H <sub>14</sub> N <sub>2</sub> O <sub>8</sub> ]·2H <sub>2</sub> O                                                                                      |
| KEXKAA      | 2.049 Å | Banerjee, S.; Choudhury, A. R.; Row, T.N. G.; Chaudhuri, S.; Ghosh, A. <i>Polyhedron</i> <b>2007</b> , <i>26</i> , 24. [Ni(H <sub>2</sub> O) <sub>6</sub> ](ClO <sub>4</sub> ) <sub>2</sub> ·2(C <sub>6</sub> H <sub>12</sub> N <sub>4</sub> )·2H <sub>2</sub> O                                                                                  |
| LEFYEB      | 2.049 Å | Seetha Lekshmi, N.; Pedireddi, V. R. <i>Inorg. Chem.</i> <b>2006</b> , <i>45</i> , 2400. [Ni(H <sub>2</sub> O) <sub>6</sub> ](p-(OH) <sub>2</sub> BC <sub>6</sub> H <sub>4</sub> COO) <sub>2</sub> ·2H <sub>2</sub> O                                                                                                                             |
| LIJSOM      | 2.049 Å | Henderson, W.; Nicholson, B. K. <i>Acta Crystallogr., Sect. C</i> <b>1995</b> , <i>51</i> , 37. [Ni(H <sub>2</sub> O) <sub>6</sub> ](C <sub>10</sub> H <sub>15</sub> O <sub>4</sub> S) <sub>2</sub>                                                                                                                                               |
| LIMWUB      | 2.049 Å | Gao, Q.; Wang, X.; Tapp, J.; Moeller, A.; Jacobson, A. J. <i>Inorg. Chem.</i> <b>2013</b> , <i>52</i> , 6610. (H <sub>3</sub> O)[Ni(H <sub>2</sub> O) <sub>6</sub> ][CrNiSb <sub>12</sub> C <sub>24</sub> H <sub>12</sub> O <sub>47</sub> ]·6H <sub>2</sub> O                                                                                     |
| LOJWEP      | 2.049 Å | Xanthopoulos, K.; Anagnostou, Z.; Chalkiadakis, S.; Choquesillo-Lazarte, D.; Mezei, G.; Zareba, J. K.; Zon, J.; Demadis, K. D. <i>Crystals</i> <b>2019</b> , <i>9</i> , 301. [Ni(H <sub>2</sub> O) <sub>6</sub> ](HO <sub>3</sub> P(CH <sub>2</sub> ) <sub>2</sub> PO <sub>3</sub> H)·2H <sub>2</sub> O                                           |
| LUMVAQ      | 2.049 Å | Chen; C.-H.; Cai; J.; Feng; X.-L.; Chen, X.-M. <i>J. Chem. Cryst.</i> <b>2001</b> , <i>31</i> , 271. [Ni(H <sub>2</sub> O) <sub>6</sub> ]C <sub>10</sub> H <sub>6</sub> O <sub>6</sub> S <sub>2</sub>                                                                                                                                             |
| KIDMAM      | 2.049 Å | Mastropietro, T. F.; Armentano, D.; Marino, N.; De Munno, G.; Anastassopoulou, J.; Theophanides, T. <i>Cryst. Growth Des.</i> <b>2007</b> , <i>7</i> , 609. [Ni(H <sub>2</sub> O) <sub>6</sub> ]Cl <sub>2</sub> ·2(C <sub>5</sub> H <sub>7</sub> N <sub>3</sub> O) <sub>2</sub>                                                                   |
| QAFQOF      | 2.049 Å | Guo, H.; Li, J.; Zhang, F.-X. <i>Wuji Huaxue Xuebao</i> <b>2010</b> , <i>26</i> , 2006. [Ni(H <sub>2</sub> O) <sub>6</sub> ](ClO <sub>4</sub> ) <sub>2</sub> ·2[NiC <sub>13</sub> H <sub>21</sub> N <sub>3</sub> O <sub>6</sub> ] <sub>2</sub> ·4H <sub>2</sub> O                                                                                 |
| QOSWEC      | 2.049 Å | Gudenschwager, M.; Wickleder, M. S. CCDC deposition number 1047103, <b>2015</b> . [Ni(H <sub>2</sub> O) <sub>6</sub> ][N,N-C <sub>4</sub> H <sub>4</sub> N <sub>2</sub> (Ni(H <sub>2</sub> O) <sub>5</sub> ) <sub>2</sub> ](C <sub>6</sub> (SO <sub>3</sub> ) <sub>6</sub> )·2H <sub>2</sub> O                                                    |
| ROLBOK24    | 2.049 Å | Siegler, M. A.; Parkin, S.; Angel, R. J.; Brock, C. P. <i>Acta Crystallogr., Sect. B</i> <b>2011</b> , <i>67</i> , 130. [Ni(H <sub>2</sub> O) <sub>6</sub> ](NO <sub>3</sub> ) <sub>2</sub> ·2C <sub>10</sub> H <sub>20</sub> O <sub>5</sub> ·H <sub>2</sub> O                                                                                    |
| ROLBUQ      | 2.049 Å | Siegler, M. A.; Parkin, S.; Selegue, J. P.; Brock, C. P. <i>Acta Crystallogr., Sect. B</i> <b>2008</b> , <i>64</i> , 725. [Ni(H <sub>2</sub> O) <sub>6</sub> ][Ni(H <sub>2</sub> O) <sub>4</sub> (CH <sub>3</sub> OH) <sub>2</sub> ](NO <sub>3</sub> ) <sub>4</sub> ·2C <sub>10</sub> H <sub>20</sub> O <sub>5</sub> ·H <sub>2</sub> O            |
| WIVCOU      | 2.049 Å | Zhang, Y.-Q.; Zhen, L.-M.; Yu, D.-H.; Zhao, Y.-J.; Xue, S.-F.; Zhu, Q.-J.; Tao, Z. <i>J. Mol Struct.</i> <b>2008</b> , <i>875</i> , 435. [Ni(H <sub>2</sub> O) <sub>6</sub> ] <sub>3</sub> (NO <sub>3</sub> ) <sub>6</sub> ·C <sub>44</sub> H <sub>48</sub> N <sub>24</sub> O <sub>12</sub> ·(CH <sub>3</sub> ) <sub>2</sub> CO·4H <sub>2</sub> O |
| 14258       | 2.050 Å | Chan, J.; Stanley, E. Z. <i>Kristallogr., Kristallgeom., Kristallphys., Kristallchem.</i> <b>1970</b> , <i>132</i> , 404. [Ni(H <sub>2</sub> O) <sub>6</sub> ]S <sub>2</sub> O <sub>6</sub>                                                                                                                                                       |
| 34794       | 2.050 Å | Montgomery, H. <i>Acta Crystallogr., Sect. B</i> <b>1979</b> , <i>35</i> , 155. (NH <sub>4</sub> ) <sub>2</sub> [Ni(H <sub>2</sub> O) <sub>6</sub> ](CrO <sub>4</sub> ) <sub>2</sub>                                                                                                                                                              |
| 82741       | 2.050 Å | Bonazzi, P.; Mazzi, F. <i>Am. Mineral.</i> <b>1996</b> , <i>81</i> , 1494. [Ni(H <sub>2</sub> O) <sub>6</sub> ](Sb(OH) <sub>6</sub> ) <sub>2</sub>                                                                                                                                                                                                |
| AROMIE      | 2.050 Å | Tandon, S. S.; Dul, M.-C.; L.Lee, J.; Dawe, L.N.; Anwar, M. U.; Thompson, L. K. <i>Dalton Trans.</i> <b>2011</b> , <i>40</i> , 3466. [Ni(H <sub>2</sub> O) <sub>6</sub> ] <sub>2</sub> [NiC <sub>28</sub> H <sub>32</sub> N <sub>16</sub> O <sub>16</sub> S <sub>4</sub> ]·4.5H <sub>2</sub> O                                                    |

|        |         |                                                                                                                                                                                                                                                                                                                 |
|--------|---------|-----------------------------------------------------------------------------------------------------------------------------------------------------------------------------------------------------------------------------------------------------------------------------------------------------------------|
| EYARIH | 2.050 Å | Bin, Z. CCDC deposition number 739542, <b>2016</b> . $[\text{Ni}(\text{H}_2\text{O})_6](\text{ClO}_4)_2 \cdot 5(\text{C}_4\text{H}_8\text{O}_2)$                                                                                                                                                                |
| LOPNAH | 2.050 Å | Nkhili, N. L.; Rekik, W.; Naili, H. <i>Monatsh. Chem.</i> <b>2014</b> , <i>145</i> , 931. $[\text{Ni}(\text{H}_2\text{O})_6](\text{C}_4\text{H}_{12}\text{N}_2)(\text{SeO}_4)_2$                                                                                                                                |
| MAXDIA | 2.050 Å | Wang, H.-S.; Zhang, W.-Q.; Li, G.-C. <i>Huaxue Yanjiu</i> <b>2010</b> , <i>21</i> , 18-4.<br>$[\text{Ni}(\text{H}_2\text{O})_6]_3[\text{Ni}(\text{C}_8\text{H}_3\text{O}_6)(\text{C}_8\text{H}_2\text{O}_6)]_2 \cdot 7\text{H}_2\text{O}$                                                                       |
| VIXCEL | 2.050 Å | Gu, J.; Zhu, Q.-Y.; Zhang, Y.; Lu, W.; Niu, G.-Y.; Dai, J. <i>Inorg. Chem. Commun.</i> <b>2008</b> , <i>11</i> , 175.<br>$[\text{Ni}(\text{H}_2\text{O})_6][\text{Ni}(\text{OCHN}(\text{CH}_3)_2)(\text{C}_{10}\text{H}_6\text{O}_4\text{S}_6)_2]_2 \cdot 2(\text{CH}_3)_2\text{NCHO} \cdot \text{H}_2\text{O}$ |
| WABMER | 2.050 Å | Kosnic, E. J.; McClymont, E. L.; Hodder, R. A.; Squattrito, P. J. <i>Inorg. Chim. Acta</i> <b>1992</b> , <i>201</i> , 143.<br>$[\text{Ni}(\text{H}_2\text{O})_6](\text{C}_6\text{H}_5\text{O}_4\text{S})_2 \cdot 2\text{H}_2\text{O}$                                                                           |
| ZERDUX | 2.050 Å | Miminoshvili, E. B.; Sakvarelidze, T. N.; Miminoshvili, K. E. <i>Zh. Strukt. Khim.</i> <b>2012</b> , <i>53</i> , 1024.<br>$[\text{Ni}(\text{H}_2\text{O})_6][\text{TiF}_6] \cdot 2\text{C}_6\text{H}_{12}\text{N}_4 \cdot \text{H}_2\text{O}$                                                                   |
| 39420  | 2.051 Å | Iskhakova, L. D.; Dubrovinskii, L. S.; Charushnikova, I. A. <i>Kristallografiya</i> <b>1991</b> , <i>36</i> , 650.<br>$[\text{Ni}(\text{H}_2\text{O})_6]\text{SO}_4 \cdot \text{H}_2\text{O}$                                                                                                                   |
| 72415  | 2.051 Å | Ptasiewicz-Bak, H.; Olovsson, I.; McIntyre, G. J. <i>Acta Crystallogr., Sect. B</i> <b>1993</b> , <i>49</i> , 192.<br>$[\text{Ni}(\text{H}_2\text{O})_6]\text{SO}_4$                                                                                                                                            |
| 84569  | 2.051 Å | Ptasiewicz-Bak, H.; Olovsson, I.; McIntyre, G. J. <i>Acta Crystallogr., Sect. B</i> <b>1997</b> , <i>53</i> , 325.<br>$[\text{Ni}(\text{H}_2\text{O})_6]\text{SO}_4 \cdot \text{H}_2\text{O}$                                                                                                                   |
| 109777 | 2.051 Å | Herrmann, W. A.; Mihali, D.; Oefele, K.; Kiprof, P.; Belmedjahed, F. <i>Chem. Ber.</i> <b>1992</b> , <i>125</i> , 1795.<br>$((\text{CH}_3)_4\text{N})_2[\text{Ni}(\text{H}_2\text{O})_6][\text{Mo}_8\text{O}_{26}]$                                                                                             |
| 132273 | 2.051 Å | Mbiangué, Y. A.; Ndinga, M. L.; Nduga, J. P.; Wenger, E.; Lecomte, C. <i>Acta Crystallogr., Sect. E</i> <b>2020</b> , <i>76</i> , 1316. $[\text{Ni}(\text{H}_2\text{O})_6][\text{BaCr}(\text{C}_2\text{O}_4)_3(\text{H}_2\text{O})_3]_2 \cdot 4\text{H}_2\text{O}$                                              |
| 419502 | 2.051 Å | Aleksandrova, M.; Haeuseler, H.; Jacquet, R.; Wagener, M. <i>Z. Naturforsch., Teil B</i> <b>2008</b> , <i>63</i> , 1367.<br>$[\text{Ni}(\text{H}_2\text{O})_6]\text{H}_4\text{I}_2\text{O}_{10}$                                                                                                                |
| ATUQAH | 2.051 Å | Zhang, Z.-Y.; Gao, S.; Huo, L.-H.; Zhao, H.; Zhao, J.-G.; Ng, S. W. <i>Acta Crystallogr., Sect. E</i> <b>2004</b> , <i>60</i> , m544. $[\text{Ni}(\text{H}_2\text{O})_6](\text{C}_7\text{H}_6\text{NO}_3)_2 \cdot 2\text{H}_2\text{O}$                                                                          |
| AXOCUN | 2.051 Å | Oelkers, B.; Schaffner, D.; Sun, Y. <i>Chem. Sel.</i> <b>2016</b> , <i>1</i> , 4440. $[\text{Ni}(\text{H}_2\text{O})_6][\text{Ni}(\text{H}_2\text{O})_4(\text{CH}(\text{SO}_3)_3)]$                                                                                                                             |
| GINWAC | 2.051 Å | Deng, Y.-F.; Zhang, H.-L.; Hong, Q.-M.; Weng, W.-Z.; Wan, H.-L.; Zhou, Z.-H. <i>J. Solid State Chem.</i> <b>2007</b> , <i>180</i> , 3152. $(\text{NH}_4)_2[\text{Ni}(\text{H}_2\text{O})_6][\text{Ti}(\text{C}_6\text{H}_6\text{O}_7)_3] \cdot 6\text{H}_2\text{O}$                                             |
| MAPHER | 2.051 Å | Pan, T.-T.; Su, J.-R.; Xu, D.-J. <i>Acta Crystallogr., Sect. E</i> <b>2005</b> , <i>61</i> , 1316.<br>$[\text{Ni}(\text{H}_2\text{O})_6][\text{Ni}(\text{C}_4\text{H}_4\text{O}_4\text{S})_2] \cdot 4\text{H}_2\text{O}$                                                                                        |
| MEYLAD | 2.051 Å | Junk, P.C.; Smith, M. K.; Steed, J. W. <i>Polyhedron</i> <b>2001</b> , <i>20</i> , 2979. $[\text{Ni}(\text{H}_2\text{O})_6](\text{ClO}_4)_2 \cdot \text{C}_8\text{H}_{16}\text{O}_4$                                                                                                                            |
| NUTTII | 2.051 Å | Mbiangué, Y. A.; Ndinga, M. L.; Nduga, J. P.; Wenger, E.; Lecomte, C. <i>Acta Crystallogr. Sect. E</i> <b>2020</b> , <i>76</i> , 1316. $[\text{Ni}(\text{H}_2\text{O})_6][\text{BaCr}(\text{C}_6\text{H}_6\text{O}_{15})_2] \cdot 4\text{H}_2\text{O}$                                                          |
| OJEBOU | 2.051 Å | Lu, S.; Ke, Y.; Li, J.; Zhang, Y. <i>Solid State Sci.</i> <b>2003</b> , <i>5</i> , 317. $((\text{CH}_3)_4\text{N})_2[\text{Ni}(\text{H}_2\text{O})_6][\text{Mo}_8\text{O}_{26}]$                                                                                                                                |

|        |         |                                                                                                                                                                                                                                                                                                                            |
|--------|---------|----------------------------------------------------------------------------------------------------------------------------------------------------------------------------------------------------------------------------------------------------------------------------------------------------------------------------|
| PEJVAC | 2.051 Å | Liu, Q.; Xu, Z.; Yu, K.-B. <i>Wuji Huaxue Xuebao</i> <b>2006</b> , <i>22</i> , 1095.<br>[Ni(H <sub>2</sub> O) <sub>6</sub> ](OOC(CH) <sub>2</sub> COO) <sub>2</sub> ·2C <sub>6</sub> H <sub>12</sub> N <sub>4</sub> ·4H <sub>2</sub> O                                                                                     |
| PEYDAZ | 2.051 Å | Deng, Z.-P.; Gao, S.; Chen, P.-G. <i>Acta Crystallogr., Sect. E</i> <b>2007</b> , <i>63</i> , m553.<br>[Ni(H <sub>2</sub> O) <sub>6</sub> ](C <sub>10</sub> H <sub>9</sub> O <sub>5</sub> ) <sub>2</sub> ·3H <sub>2</sub> O                                                                                                |
| TINRAK | 2.051 Å | Yasodha, V.; Govindarajan, S.; Manivannan, V.; Buyukgungor, O. <i>Acta Crystallogr., Sect. E</i> <b>2007</b> , <i>63</i> , m2720. [Ni(H <sub>2</sub> O) <sub>6</sub> ]C <sub>7</sub> H <sub>2</sub> O <sub>6</sub> ·H <sub>2</sub> O                                                                                       |
| XEMGAX | 2.051 Å | Steed, J. W.; Sakellariou, E.; Junk, P. C.; Smith, M. K. <i>Chem. Eur. J.</i> <b>2001</b> , <i>7</i> , 1240.<br>[Ni(H <sub>2</sub> O) <sub>6</sub> ]Br <sub>2</sub> (C <sub>10</sub> H <sub>20</sub> O <sub>5</sub> )·2H <sub>2</sub> O                                                                                    |
| XOHJAF | 2.051 Å | Barton, M. R.; Yuegang Zhang; Atwood, J. D. <i>J. Coord. Chem.</i> <b>2002</b> , <i>55</i> , 969. [Ni(H <sub>2</sub> O) <sub>6</sub> ](3-SO <sub>3</sub> -C <sub>6</sub> H <sub>4</sub> P(C <sub>6</sub> H <sub>5</sub> ) <sub>2</sub> ) <sub>2</sub> ·H <sub>2</sub> O                                                    |
| WEPKUY | 2.051 Å | Xie, Y.-R.; Yang, Y.-C.; Yuan, X.-Y.; Yang, R.-Q. <i>Acta Crystallogr., Sect. E</i> <b>2006</b> , <i>62</i> , m2683.<br>[Ni(H <sub>2</sub> O) <sub>6</sub> ](5-NO <sub>2</sub> -2-CH <sub>3</sub> -C <sub>6</sub> H <sub>3</sub> SO <sub>3</sub> ) <sub>2</sub> ·4H <sub>2</sub> O                                         |
| XOHJAF | 2.051 Å | Barton, M. R.; Zhang, Y.; Atwood, J. D. <i>J. Coord. Chem.</i> <b>2002</b> , <i>55</i> , 969. [Ni(H <sub>2</sub> O) <sub>6</sub> ]((C <sub>6</sub> H <sub>5</sub> ) <sub>2</sub> (3-SO <sub>3</sub> -C <sub>6</sub> H <sub>4</sub> )P) <sub>2</sub> ·H <sub>2</sub> O                                                      |
| 15232  | 2.052 Å | Kutoglu, A. Z. <i>Kristallogr., Kristallgeom., Kristallphys., Kristallchem.</i> <b>1973</b> , <i>137</i> , 51.<br>[Ni(H <sub>2</sub> O) <sub>6</sub> ][V(H <sub>2</sub> O) <sub>6</sub> ] <sub>3</sub> (SO <sub>4</sub> ) <sub>4</sub>                                                                                     |
| 20226  | 2.052 Å | Ivanov, S. B.; Mikhailov, Yu. N.; Kuznetsov, V. G.; Davidovich, R. L. <i>Zh. Strukt. Khim.</i> <b>1981</b> , <i>22</i> , 188<br>[Ni(H <sub>2</sub> O) <sub>6</sub> ] <sub>3</sub> [(UO <sub>2</sub> ) <sub>2</sub> F <sub>7</sub> ]                                                                                        |
| 39419  | 2.052 Å | Iskhakova, L. D.; Dubrovinskii, L. S.; Charushnikova, I. A. <i>Kristallografiya</i> <b>1991</b> , <i>36</i> , 650.<br>[Ni(H <sub>2</sub> O) <sub>6</sub> ]SO <sub>4</sub> ·H <sub>2</sub> O                                                                                                                                |
| 68493  | 2.052 Å | Gallucci, J. C.; Gerkin, R. E.; Reppart, W. J. <i>Acta Crystallogr., Sect. C</i> <b>1990</b> , <i>46</i> , 1580.<br>[Ni(H <sub>2</sub> O) <sub>6</sub> ](BrO <sub>4</sub> ) <sub>2</sub>                                                                                                                                   |
| 70446  | 2.052 Å | Mamdouh, A.-A.; Ibrahim, A. B. M.; Reyad, N. E.-H. A.; Elsayed, Tarek R.; Cordeiro Santos, I.; Paulo, A.; Mahfouz, R. M. <i>J. Cluster. Sci.</i> <b>2023</b> , <i>34</i> , 1535-1546. (NH <sub>4</sub> ) <sub>2</sub> [Ni(H <sub>2</sub> O) <sub>6</sub> ] <sub>2</sub> V <sub>10</sub> O <sub>28</sub> ·4H <sub>2</sub> O |
| 143443 | 2.052 Å | Mahmoud, G. A.-E.; Ibrahim, A. B. M.; Mayer, P. <i>Chem. Select</i> <b>2021</b> , <i>6</i> , 3782.<br>(NH <sub>4</sub> ) <sub>2</sub> [Ni(H <sub>2</sub> O) <sub>6</sub> ] <sub>2</sub> [V <sub>10</sub> O <sub>28</sub> ·4H <sub>2</sub> O                                                                                |
| AJIQOZ | 2.052 Å | Zheng, Y.-Q.; Kong, Z.-P. <i>J. Coord. Chem.</i> <b>2003</b> , <i>56</i> , 967. [Ni(H <sub>2</sub> O) <sub>6</sub> ][Ni(H <sub>2</sub> O) <sub>2</sub> (C <sub>4</sub> H <sub>2</sub> O <sub>4</sub> ) <sub>2</sub> ]·4H <sub>2</sub> O                                                                                    |
| AWELAQ | 2.052 Å | Pan, T.; Liang, Q.; Liu, D.; Huang, C. <i>J. Chem. Cryst.</i> <b>2011</b> , <i>41</i> , 1133. [Ni(H <sub>2</sub> O)·6][Ni <sub>2</sub> C <sub>24</sub> H <sub>24</sub> N <sub>2</sub> O <sub>16</sub> ]                                                                                                                    |
| GIYNOR | 2.052 Å | Haussuhl, E.; Giester, G.; Tillmanns, E. <i>Z. Kristallogr – New Cryst. Struct.</i> <b>1997</b> , <i>212</i> , 171.<br>[Ni(H <sub>2</sub> O) <sub>6</sub> ][Zr(C <sub>6</sub> H <sub>6</sub> NO <sub>6</sub> ) <sub>2</sub> ]·2.5H <sub>2</sub> O                                                                          |
| IDUSEG | 2.052 Å | Xu, B.; Zhang, Y.-Y.; Liu, W.-L.; Hu, X.-Y. <i>Acta Crystallogr., Sect. E</i> <b>2006</b> , <i>62</i> , m1508.<br>[Ni(H <sub>2</sub> O) <sub>6</sub> ][CuC <sub>12</sub> H <sub>11</sub> N <sub>2</sub> O <sub>4</sub> ] <sub>2</sub> ·12H <sub>2</sub> O                                                                  |

|          |         |                                                                                                                                                                                                                                                                                                                                         |
|----------|---------|-----------------------------------------------------------------------------------------------------------------------------------------------------------------------------------------------------------------------------------------------------------------------------------------------------------------------------------------|
| INAZEC   | 2.052 Å | Dagur, P.; Chopra, D.; Prakash, A. S.; Row, T. N. G.; Hegde, M. S. <i>Acta Crystallogr., Sect. E</i> <b>2003</b> , <i>59</i> , m1129. [Ni(H <sub>2</sub> O) <sub>6</sub> ]Cr <sub>2</sub> O <sub>7</sub> ·2C <sub>6</sub> H <sub>12</sub> N <sub>2</sub> ·6H <sub>2</sub> O                                                             |
| KEXKAA01 | 2.052 Å | Singh, G.; Baranwal, B. P.; Kapoor, I. P.S.; Kumar, D.; Frohlich, R. <i>J. Phys. Chem. A</i> <b>2007</b> , <i>111</i> , 12972. [Ni(H <sub>2</sub> O) <sub>6</sub> ](ClO <sub>4</sub> ) <sub>2</sub> ·2(C <sub>6</sub> H <sub>12</sub> N <sub>4</sub> )·2H <sub>2</sub> O                                                                |
| YOQGES   | 2.052 Å | Amendola, V.; Boiocchi, M.; Fabbri, L.; Fusco, N.; Valeri, E. <i>Chem. Eur. J.</i> <b>2014</b> , <i>20</i> , 11994. [Ni(H <sub>2</sub> O) <sub>6</sub> ][Ni(C <sub>6</sub> H <sub>15</sub> N <sub>3</sub> ) <sub>2</sub> ](NO <sub>3</sub> ) <sub>4</sub>                                                                               |
| 84570    | 2.053 Å | Ptasiewicz-Bak, H.; Olovsson, I.; McIntyre, G. J. <i>Acta Crystallogr., Sect. B</i> <b>1997</b> , <i>53</i> , 325. [Ni(H <sub>2</sub> O) <sub>6</sub> ]SO <sub>4</sub> ·H <sub>2</sub> O                                                                                                                                                |
| 112565   | 2.053 Å | Colliard, I.; Brown, J. C.; Fast, D. B.; Sockwell, A. K.; Hixon, A. E.; Nyman, M. <i>J. Am. Chem. Soc.</i> <b>2021</b> , <i>143</i> , 9612.                                                                                                                                                                                             |
| 263113   | 2.053 Å | Babaryk, A. A.; Kozachkova, A. N.; Tsaryk, N. V.; Dudko, A. V.; Pekhnyo, V. I. <i>Acta Crystallogr., Sect. E</i> <b>2012</b> , <i>68</i> , m242. K <sub>2</sub> [Ni(H <sub>2</sub> O) <sub>6</sub> ][Pd <sub>3</sub> (CH <sub>2</sub> O <sub>6</sub> P <sub>2</sub> ) <sub>3</sub> ]·6H <sub>2</sub> O                                  |
| 424301   | 2.053 Å | Zimmermann, L. W.; Schleid, T. <i>Z. Kristallogr – New Cryst. Struct.</i> <b>2013</b> , <i>228</i> , 558. [Ni(H <sub>2</sub> O) <sub>6</sub> ]B <sub>10</sub> H <sub>10</sub> ·2H <sub>2</sub> O                                                                                                                                        |
| BAZLAP   | 2.053 Å | Zalkin, A.; Ruben, H.; Templeton, D. H. <i>Acta Crystallogr., Sect. B</i> <b>1982</b> , <i>38</i> , 610. [Ni(H <sub>2</sub> O) <sub>6</sub> ][U(C <sub>6</sub> H <sub>9</sub> O <sub>8</sub> ) <sub>2</sub> ]                                                                                                                           |
| DUVNIT   | 2.053 Å | Klepov, V. V.; Serezhkina, L. B.; Pushkin, D. V.; Alekseev, E. V.; Grigor'ev, M. S.; Sergeeva, O. A.; Shimin, N. A.; Serezhkin, V. N. <i>Eur. J. Inorg. Chem.</i> <b>2016</b> , 118. [Ni(H <sub>2</sub> O) <sub>6</sub> ][UO <sub>2</sub> (OOCCHCH <sub>2</sub> ) <sub>3</sub> ] <sub>2</sub>                                           |
| IYUKIW   | 2.053 Å | Zou, Y.; Liu, W.-L.; Xie, J.-L.; Ni, C.-L.; Ni, Z.-P.; Li, Y.-Z.; Meng, Q.-J.; Yao, Y.-G. <i>J. Coord. Chem.</i> <b>2004</b> , <i>57</i> , 381. [Ni(H <sub>2</sub> O) <sub>6</sub> ][CuC <sub>11</sub> H <sub>9</sub> N <sub>2</sub> O <sub>4</sub> ] <sub>2</sub> ·10H <sub>2</sub> O                                                  |
| KEMWOQ   | 2.053 Å | Tabatabaee, M.; Amini, M. M.; Saheli, S.; Vakilia, F. <i>Acta Chim. Slov.</i> <b>2012</b> , <i>59</i> , 375. [Ni(H <sub>2</sub> O) <sub>6</sub> ][Ni(H <sub>2</sub> O) <sub>4</sub> (C <sub>10</sub> H <sub>8</sub> N <sub>2</sub> )][NiC <sub>14</sub> H <sub>6</sub> N <sub>2</sub> O <sub>8</sub> ] <sub>2</sub> ·6H <sub>2</sub> O  |
| MACHOO   | 2.053 Å | Falvello, L. R.; Ferrer D.; Soler, T.; Tomas, M. <i>Acta Crystallogr., Sect. C</i> <b>2003</b> , <i>59</i> , m149. [Ni(H <sub>2</sub> O) <sub>6</sub> ](C <sub>5</sub> H <sub>3</sub> N <sub>2</sub> O <sub>2</sub> ) <sub>2</sub> ·2H <sub>2</sub> O                                                                                   |
| MARFEU   | 2.053 Å | Nkhili, N. L.; Rekik, W.; Naili, H.; Mhiri, T.; Bataille, T. <i>Arab. J. Chem.</i> <b>2017</b> , <i>10</i> , S2509. (C <sub>6</sub> H <sub>14</sub> N <sub>2</sub> )[Ni(H <sub>2</sub> O) <sub>6</sub> ](SeO <sub>4</sub> ) <sub>2</sub>                                                                                                |
| MEHZEE   | 2.053 Å | Zhaohui; Z.; Yongqing; H.; Yaqi, J.; Yiji; L.; Guodong, L.; Hongbin, Z. <i>Wuji Huaxue Xuebao</i> <b>1997</b> , <i>13</i> , 385. (NH <sub>4</sub> ) <sub>2</sub> [Ni(H <sub>2</sub> O) <sub>6</sub> ][Ni(C <sub>6</sub> H <sub>5</sub> O <sub>4</sub> ) <sub>2</sub> (H <sub>2</sub> O) <sub>2</sub> ] <sub>2</sub> ·10H <sub>2</sub> O |
| PIWKIR   | 2.053 Å | Zimmermann, L. W.; Schleid, T. <i>Z. Krist. Cryst. Mater.</i> <b>2013</b> , <i>228</i> , 558. [Ni(H <sub>2</sub> O) <sub>6</sub> ]B <sub>10</sub> H <sub>10</sub> ·2H <sub>2</sub> O                                                                                                                                                    |
| QALVAA   | 2.053 Å | Williams, A. R.; Alleyne, B. D.; Hall, L. A.; White, A. J. P.; Williams, D. J.; Thompson, L. K. <i>Inorg. Chem.</i> <b>2000</b> , <i>39</i> , 5265. [Ni(H <sub>2</sub> O) <sub>6</sub> ](C <sub>16</sub> H <sub>10</sub> NO <sub>3</sub> ) <sub>2</sub> ·2H <sub>2</sub> O                                                              |
| ROLBOK   | 2.053 Å | Siegler, M. A.; Parkin, S.; Selegue, J. P.; Brock, C. P. <i>Acta Crystallogr., Sect. B</i> <b>2008</b> , <i>64</i> , 725. [Ni(H <sub>2</sub> O) <sub>6</sub> ](NO <sub>3</sub> ) <sub>2</sub> ·2C <sub>10</sub> H <sub>20</sub> O <sub>5</sub> ·H <sub>2</sub> O                                                                        |

|          |         |                                                                                                                                                                                                                                                                                                                                   |
|----------|---------|-----------------------------------------------------------------------------------------------------------------------------------------------------------------------------------------------------------------------------------------------------------------------------------------------------------------------------------|
| VUQZOY   | 2.053 Å | Naili, H.; BenHassan, D.; Rekik, W. CCDC deposition number 1433260, <b>2015</b> .<br>[Ni(H <sub>2</sub> O) <sub>6</sub> ](C <sub>4</sub> H <sub>12</sub> N <sub>2</sub> ) <sub>2</sub> (NO <sub>3</sub> ) <sub>6</sub>                                                                                                            |
| YUDDAC   | 2.053 Å | Salas, J. M.; Quiros, M.; Romero, M. A.; Sanches, M. P.; Salas M. A., <i>Polyhedron</i> <b>1995</b> , <i>14</i> , 611.<br>[Ni(H <sub>2</sub> O) <sub>6</sub> ](C <sub>9</sub> H <sub>9</sub> N <sub>4</sub> O <sub>5</sub> ) <sub>2</sub> ·4H <sub>2</sub> O                                                                      |
| ZASRIU   | 2.053 Å | Porai-Koshits, M. A.; Antsyshkina, A. S.; Shkol'nikova, L. M.; Sadikov, G. G.; Davidovich, R. L. <i>Koord. Khim.</i> <b>1995</b> , <i>21</i> , 311. [Ni(H <sub>2</sub> O) <sub>6</sub> ][BiC <sub>20</sub> H <sub>24</sub> N <sub>4</sub> O <sub>16</sub> ]·3H <sub>2</sub> O                                                     |
| ULAXEM   | 2.053 Å | Golovnev, N. N.; Molokeev, M. S.; Lesnikov, M. K.; Atuchin, V. V. <i>Chem. Phys. Lett.</i> <b>2016</b> , <i>653</i> , 54.<br>[Ni(H <sub>2</sub> O) <sub>6</sub> ](C <sub>8</sub> H <sub>11</sub> N <sub>2</sub> O <sub>2</sub> S) <sub>2</sub> ·2H <sub>2</sub> O                                                                 |
| WUZNAH   | 2.053 Å | Zhang, M.-L.; Xing, F.-G.; Wang, Z.-L. <i>Jiegou Huaxue</i> <b>2010</b> , <i>29</i> , 592. [Ni(H <sub>2</sub> O) <sub>6</sub> ](C <sub>8</sub> H <sub>7</sub> O <sub>4</sub> ) <sub>2</sub> ·2H <sub>2</sub> O                                                                                                                    |
| 20885    | 2.054 Å | Ivanov, S. B.; Mikhailov, Yu. N.; Davidovich, R. L. <i>Koord. Khim.</i> <b>1982</b> , <i>8</i> , 1250.<br>[Ni(H <sub>2</sub> O) <sub>6</sub> ] <sub>3</sub> [(UO <sub>2</sub> )F <sub>4</sub> ]·H <sub>2</sub> O                                                                                                                  |
| 23271    | 2.054 Å | Montgomery, H. <i>Acta Crystallogr., Sect. B</i> <b>1980</b> , <i>36</i> , 2121. (NH <sub>4</sub> ) <sub>2</sub> [Ni(H <sub>2</sub> O) <sub>6</sub> ](SeO <sub>4</sub> ) <sub>2</sub>                                                                                                                                             |
| 26342    | 2.054 Å | Leclaire, A.; Borel, M. M. <i>Acta Crystallogr., Sect. B</i> <b>1980</b> , <i>36</i> , 3090. (NH <sub>4</sub> ) <sub>2</sub> [Ni(H <sub>2</sub> O) <sub>6</sub> ][BeF <sub>4</sub> ] <sub>2</sub>                                                                                                                                 |
| 710006   | 2.054 Å | Euler, H.; Barbier, B.; Meents, A.; Kirfel, A. <i>Z. Kristallogr. – New Cryst. Struct.</i> <b>2009</b> , <i>224</i> , 355.<br>Tl <sub>2</sub> [Ni(H <sub>2</sub> O) <sub>6</sub> ](SO <sub>4</sub> ) <sub>2</sub>                                                                                                                 |
| 710012   | 2.054 Å | Euler, H.; Barbier, B.; Meents, A.; Kirfel, A. <i>Z. Kristallogr. – New Cryst. Struct.</i> <b>2009</b> , <i>224</i> , 355.<br>Tl <sub>2</sub> [Ni(H <sub>2</sub> O) <sub>6</sub> ](SeO <sub>4</sub> ) <sub>2</sub>                                                                                                                |
| FOLZIQ   | 2.054 Å | Wang, Q.-Y.; Zhang, Z.-T. <i>Acta Crystallogr., Sect. E</i> <b>2005</b> , <i>61</i> , m215. [Ni(H <sub>2</sub> O) <sub>6</sub> ](C <sub>17</sub> H <sub>13</sub> O <sub>7</sub> S) <sub>2</sub> ·8H <sub>2</sub> O                                                                                                                |
| HEKKOX   | 2.054 Å | Steed, J. W.; McCool, B. J.; Junk, P. C. <i>J. Chem. Soc., Dalton Trans.</i> <b>1998</b> , 3417.<br>[Ni(H <sub>2</sub> O) <sub>6</sub> ] <sub>3</sub> [NiBr <sub>2</sub> (H <sub>2</sub> O) <sub>4</sub> ]Br <sub>6</sub> ·4C <sub>12</sub> H <sub>24</sub> O <sub>6</sub> ·2H <sub>2</sub> O                                     |
| IMIQAW   | 2.054 Å | Antsyshkina, A. S.; Sadikov, G. G.; Poznyak, A. L.; Shkol'nikova, L. M.; Sergienko, V. S. <i>Zh. Neorg. Khim.</i> <b>1996</b> , <i>41</i> , 1456. [Ni(H <sub>2</sub> O) <sub>6</sub> ] <sub>3</sub> [NiC <sub>32</sub> H <sub>44</sub> N <sub>4</sub> O <sub>24</sub> S <sub>4</sub> ]·12H <sub>2</sub> O                         |
| KUVZUZ   | 2.054 Å | Seals, W.; Arman, H.; Batha, S.; Musie, G. T. <i>Inorg. Chim. Acta</i> <b>2016</b> , <i>448</i> , 16.<br>[Ni(H <sub>2</sub> O) <sub>6</sub> ][NiC <sub>2</sub> H <sub>8</sub> O <sub>4</sub> S <sub>2</sub> ] <sub>2</sub> [NiC <sub>23</sub> H <sub>27</sub> N <sub>2</sub> O <sub>11</sub> ]·12H <sub>2</sub> O                 |
| LOFGUK   | 2.054 Å | Hundal, G.; Hundal, M. S.; Hwang, Y. K.; Chang, J. S. <i>Cryst. Growth Des.</i> <b>2014</b> , <i>14</i> , 172.<br>[Ni(H <sub>2</sub> O) <sub>6</sub> ][Ni(H <sub>2</sub> O) <sub>2</sub> (C <sub>7</sub> H <sub>3</sub> NO <sub>8</sub> ) <sub>2</sub> ]·4H <sub>2</sub> O                                                        |
| LUMVAQ01 | 2.054 Å | Chen, P.-G.; Gu, C.-S.; Gao, S.; Zhu, Z.-B.; Zhao, J.-G. <i>Harbin Ligong Daxue Xuebao</i> <b>2004</b> , <i>9</i> , 67.<br>[Ni(H <sub>2</sub> O) <sub>6</sub> ]C <sub>10</sub> H <sub>6</sub> O <sub>6</sub> S <sub>2</sub>                                                                                                       |
| NOXBOR   | 2.054 Å | Duda, A. M.; Karaczyn, A.; Kozłowski, H.; Fritsky, I. O.; Glowiak, T.; Prisyazhnaya, E. V.; Sliva, T. Yu.; Swiatek.Kozłowska, J. <i>J. Chem. Soc., Dalton Trans.</i> <b>1997</b> , 3853. [Ni(H <sub>2</sub> O) <sub>6</sub> ][NiC <sub>9</sub> H <sub>13</sub> N <sub>4</sub> O <sub>4</sub> ] <sub>2</sub>                       |
| PEKWUX   | 2.054 Å | Muller, A.; Johannnes, K. U.; Straube, M.; Krickemeyer, E. <i>Z. Anorg. Allg. Chem.</i> <b>1993</b> , <i>619</i> , 1037.<br>Tl <sub>2</sub> [Ni(H <sub>2</sub> O) <sub>6</sub> ][NiC <sub>2</sub> H <sub>8</sub> O <sub>4</sub> S <sub>2</sub> ][NiC <sub>10</sub> H <sub>18</sub> N <sub>2</sub> O <sub>4</sub> S <sub>2</sub> ] |

|        |         |                                                                                                                                                                                                                                                                                                                                                         |
|--------|---------|---------------------------------------------------------------------------------------------------------------------------------------------------------------------------------------------------------------------------------------------------------------------------------------------------------------------------------------------------------|
| ZUTCOG | 2.054 Å | Apblett, A. W.; Cubano, L. A.; Georgieva, G. D.; Mague, J. T. <i>Chem. Mater.</i> <b>1996</b> , <i>8</i> , 650. [Ni(H <sub>2</sub> O) <sub>6</sub> ][FeC <sub>10</sub> H <sub>13</sub> ClN <sub>2</sub> O <sub>8</sub> ]·2H <sub>2</sub> O                                                                                                              |
| XAFFEQ | 2.054 Å | Suzuki, J.; Yamauchi, T.; Akashi, H. <i>Shiz. Kag. Kenk. Kenkyo Hokoku, Okayama Rika Daig.</i> <b>2001</b> , <i>13</i> . [Ni(H <sub>2</sub> O) <sub>6</sub> ][Na <sub>2</sub> C <sub>24</sub> H <sub>28</sub> O <sub>24</sub> S <sub>8</sub> ]·4H <sub>2</sub> O                                                                                        |
| 10435  | 2.055 Å | Montgomery, H. <i>Acta Crystallogr., Sect. B</i> <b>1980</b> , <i>36</i> , 440. (NH <sub>4</sub> ) <sub>2</sub> [Ni(H <sub>2</sub> O) <sub>6</sub> ](SeO <sub>4</sub> ) <sub>2</sub>                                                                                                                                                                    |
| 62051  | 2.055 Å | Stadnicka, K.; Glazer, A. M.; Koralewski, M. <i>Acta Crystallogr., Sect. B</i> <b>1987</b> , <i>43</i> , 319; <b>1993</b> , <i>49</i> , 641. [Ni(H <sub>2</sub> O) <sub>6</sub> ]SO <sub>4</sub>                                                                                                                                                        |
| 67106  | 2.055 Å | Gallucci, J. C.; Gerkin, R. E. <i>Acta Crystallogr., Sect. C</i> <b>1990</b> , <i>46</i> , 350. [Ni(H <sub>2</sub> O) <sub>6</sub> ](ClO <sub>3</sub> ) <sub>2</sub>                                                                                                                                                                                    |
| 72414  | 2.055 Å | Ptasiewicz-Bak, H.; Olovsson, I.; McIntyre, G. J. <i>Acta Crystallogr., Sect. B</i> <b>1993</b> , <i>49</i> , 192. [Ni(H <sub>2</sub> O) <sub>6</sub> ]SO <sub>4</sub>                                                                                                                                                                                  |
| 82741  | 2.055 Å | Bonazzi, P.; Mazzi, F. <i>Am. Mineral.</i> <b>1996</b> , <i>81</i> , 1494. [Ni(H <sub>2</sub> O) <sub>6</sub> ](Sb(OH) <sub>6</sub> ) <sub>2</sub>                                                                                                                                                                                                      |
| 300003 | 2.055 Å | Hodgson, P. G.; Montgomery, H.; Moore, F. H.; Smith, G.; Eggins, R.; Kennard, C. H. L. <i>Cryst. Struct. Commun.</i> <b>1978</b> , <i>7</i> , 127. (NH <sub>4</sub> ) <sub>2</sub> [Ni(H <sub>2</sub> O) <sub>6</sub> ](CrO <sub>4</sub> ) <sub>2</sub>                                                                                                 |
| BECRIL | 2.055 Å | Fu, R.-B.; Wu, X.-T.; Hu, S.-M.; Zhang, J.-J.; Fu, Z.-Y.; Du, W.-X. <i>Polyhedron</i> <b>2003</b> , <i>22</i> , 2739. [Ni(H <sub>2</sub> O) <sub>6</sub> ](HO <sub>3</sub> P(CH <sub>2</sub> ) <sub>4</sub> PO <sub>3</sub> H)·2H <sub>2</sub> O                                                                                                        |
| DURQOX | 2.055 Å | Safaei-Ghomi, J.; Motieiyani, E.; Manteghi, F.; Ghadermazi, M.; Aghabozorg, H. <i>Acta Crystallogr., Sect. E</i> <b>2010</b> , <i>66</i> , m1016. [Ni(H <sub>2</sub> O) <sub>6</sub> ][Ni <sub>3</sub> C <sub>28</sub> H <sub>20</sub> N <sub>4</sub> O <sub>20</sub> ]·8H <sub>2</sub> O                                                               |
| FAMKIP | 2.055 Å | Tabatabaee, M.; Tahriri, M. Tahriri, M.; Ozawa, Y.; Neumuller, B.; Fujioka, H.; Toriumi, K. <i>Polyhedron</i> <b>2012</b> , <i>33</i> , 336. [Ni(H <sub>2</sub> O) <sub>6</sub> ] <sub>3</sub> [Ni(C <sub>7</sub> H <sub>3</sub> NO <sub>4</sub> ) <sub>2</sub> ] <sub>2</sub> [NiC <sub>12</sub> H <sub>13</sub> NO <sub>11</sub> ]·20H <sub>2</sub> O |
| ITUTEW | 2.055 Å | Samsonenko, D. G.; Geras'ko, O. A.; Mit'kina, T. V.; Lipkowski, J.; Virovets, A. V.; Fenske, D.; Fedin, V. P. <i>Koord. Khim.</i> <b>2003</b> , <i>29</i> , 178. [Ni(H <sub>2</sub> O) <sub>6</sub> ] <sub>2</sub> (SO <sub>4</sub> ) <sub>2</sub> ·C <sub>26</sub> H <sub>536</sub> N <sub>24</sub> O <sub>12</sub> ·16H <sub>2</sub> O                |
| JEQMIC | 2.055 Å | Zhang, Z.-T.; Zhang, X.-L.; Zhang, Y. H. <i>J. Cryst. Chem.</i> <b>2006</b> , <i>36</i> , 517. [Ni(H <sub>2</sub> O) <sub>6</sub> ](C <sub>19</sub> H <sub>17</sub> O <sub>9</sub> S <sub>2</sub> )·2H <sub>2</sub> O                                                                                                                                   |
| JIRRAE | 2.055 Å | Genther, D. J.; Squattrito, P. J.; Kirschbaum, K.; Yearley, E. J.; Pinkerton, A. A. <i>Acta Crystallogr., Sect. E</i> <b>2007</b> , <i>63</i> , m604. [Ni(H <sub>2</sub> O) <sub>6</sub> ](C <sub>10</sub> H <sub>8</sub> NO <sub>3</sub> S) <sub>2</sub> ·3H <sub>2</sub> O                                                                            |
| NAKTEA | 2.055 Å | Li, S.-J.; Hu, S.-W.; Song, W.-D.; Qin, P.-W.; Ma, X.-T. <i>Acta Crystallogr., Sect. E</i> <b>2010</b> , <i>66</i> , m1383. [Ni(H <sub>2</sub> O) <sub>6</sub> ](C <sub>16</sub> H <sub>12</sub> O <sub>6</sub> )·H <sub>2</sub> O                                                                                                                      |
| OBUPIN | 2.055 Å | Felder, J.; Yeon, J.; Smith, M.; zur Loye, H.-C. <i>Inorg. Chem. Front.</i> <b>2017</b> , <i>4</i> , 368. [Ni(H <sub>2</sub> O) <sub>6</sub> ][UF <sub>5</sub> ] <sub>2</sub> ·2H <sub>2</sub> O                                                                                                                                                        |
| QOSJEQ | 2.055 Å | Tu, X.; Chen, H.; Zhang, S.; Ma, P. <i>J. Cluster Sci.</i> <b>2019</b> , 10.1007/s10876-019-01726-1. [Ni(H <sub>2</sub> O) <sub>6</sub> ] <sub>3</sub> [Ni <sub>3</sub> C <sub>24</sub> H <sub>34</sub> N <sub>2</sub> O <sub>26</sub> ][NiC <sub>12</sub> H <sub>13</sub> NO <sub>11</sub> ]·20H <sub>2</sub> O                                        |
| QOSJIU | 2.055 Å | Tu, X.; Chen, H.; Zhang, S.; Ma, P. <i>J. Cluster Sci.</i> <b>2019</b> , 10.1007/s10876-019-01726-1. [Ni(H <sub>2</sub> O) <sub>6</sub> ] <sub>3</sub> [Ni <sub>3</sub> C <sub>24</sub> H <sub>34</sub> N <sub>2</sub> O <sub>26</sub> ][NiC <sub>12</sub> H <sub>13</sub> NO <sub>11</sub> ]·20H <sub>2</sub> O                                        |



|              |         |                                                                                                                                                                                                                                                                                                                                               |
|--------------|---------|-----------------------------------------------------------------------------------------------------------------------------------------------------------------------------------------------------------------------------------------------------------------------------------------------------------------------------------------------|
| SAVXUL       | 2.055 Å | Soleimannejad, J.; Moghzi, F.; Hooshmand, S.; Dankoob, Z.; Ardalani, M.; Shamsipur, M. <i>Polyhedron</i> <b>2017</b> , <i>133</i> , 24. $[\text{Ni}(\text{H}_2\text{O})_6](4\text{-NH}_2\text{-C}_5\text{H}_5\text{N})_2[\text{Ni}(\text{C}_7\text{H}_3\text{NO}_4)_2]_2 \cdot 2\text{C}_2\text{H}_5\text{OH} \cdot 4\text{H}_2\text{O}$      |
| SOQTOI       | 2.055 Å | Palenik, R. C.; Abboud, K. A.; Palenik, G. J. <i>Inorg. Chim. Acta</i> <b>2009</b> , <i>362</i> , 1374. $(\text{H}_3\text{O})_4[\text{Ni}(\text{H}_2\text{O})_6]_4[\text{Ni}_2\text{Sb}_6\text{C}_{24}\text{H}_{32}\text{O}_{34}\text{S}_{12}]_3(\text{Sb}_6\text{C}_{24}\text{H}_{12}\text{O}_{24}\text{S}_{12}) \cdot 68\text{H}_2\text{O}$ |
| XEMGEB       | 2.055 Å | Steed, J. W.; Sakellariou, E.; Junk, P. C.; Smith, M. K. <i>Chem. Eur. J.</i> <b>2001</b> , <i>7</i> , 1240. $[\text{Ni}(\text{H}_2\text{O})_6](\text{ClO}_4)_2(\text{C}_{10}\text{H}_{20}\text{O}_5) \cdot 2\text{H}_2\text{O}$                                                                                                              |
| 19045        | 2.056 Å | Louer, M.; Grandjean, D.; Weigel, D. <i>J. Solid State Chem.</i> <b>1973</b> , <i>7</i> , 222; <i>Comptes Rendus Hebdomadaires des Seances de l'Academie des Sciences, Serie B</i> <b>1967</b> , <i>264</i> , 895. $[\text{Ni}(\text{H}_2\text{O})_6]_2$                                                                                      |
| 40982        | 2.056 Å | Fender, B. E. F.; Figgis, B. N.; Forsyth, J. B. <i>Aust. J. Chem.</i> <b>1986</b> , <i>39</i> , 1023. $(\text{NH}_4)_2[\text{Ni}(\text{H}_2\text{O})_6](\text{SO}_4)_2, (\text{ND}_4)_2[\text{Ni}(\text{D}_2\text{O})_6](\text{SO}_4)_2$                                                                                                      |
| 61461, 62816 | 2.056 Å | Jouini, A.; Dabbabi, M.; Durif, A. <i>J. Solid State Chem.</i> <b>1985</b> , <i>60</i> , 6. $(\text{NH}_4)_2[\text{Ni}(\text{H}_2\text{O})_6](\text{P}_4\text{O}_{12}) \cdot \text{H}_2\text{O}$                                                                                                                                              |
| 91541        | 2.056 Å | Pietraszko, A.; Perekalina, Z. B.; Soboleva, L. B.; Kirpichnikova, L. F. <i>Kristallografiya</i> <b>2000</b> , <i>45</i> , 525. $\text{K}_2[\text{Ni}(\text{H}_2\text{O})_6](\text{SO}_4)_2$                                                                                                                                                  |
| 143465       | 2.056 Å | Weil, M. <i>Chem.</i> <b>2021</b> , <i>3</i> , 45. $(\text{NH}_4)_2[\text{Ni}(\text{H}_2\text{O})_6](\text{PO}_3\text{F})_2$ .                                                                                                                                                                                                                |
| 170781       | 2.056 Å | Quarsal, R.; El Bali, B.; Lachkar, M.; Dusek, M.; Fejfarova, K. <i>Acta Crystallogr., Sect. E</i> <b>2005</b> , <i>61</i> , i171. $(\text{NH}_4)_2[\text{Ni}(\text{H}_2\text{O})_6](\text{HPO}_3)_4$                                                                                                                                          |
| 190007       | 2.056 Å | Gjikaj, M.; Wu, P.; Pook, N.-P. <i>Acta Crystallogr., Sect. E</i> <b>2013</b> , <i>69</i> , i83. $[\text{Ni}(\text{H}_2\text{O})_6]\text{H}_2\text{P}_2\text{O}_6$                                                                                                                                                                            |
| 193806       | 2.056 Å | Held, P. <i>Acta Crystallogr., Sect. E</i> <b>2014</b> , <i>70</i> , 403. $((\text{CH}_3)_2\text{NH}_2)_2[\text{Ni}(\text{H}_2\text{O})_6](\text{SO}_4)_2 \cdot 2\text{H}_2\text{O}$                                                                                                                                                          |
| 391376       | 2.056 Å | Li, D.-H.; Liu S.-X.; Peng J.; Shao K.-Z.; Xu H.-B.; Zhai H.-J.; Wang, E.-B. <i>Wuji Huaxue Xuebao</i> <b>2004</b> , <i>20</i> , 1076. $\text{K}[\text{Ni}(\text{H}_2\text{O})_6][\text{V}_{10}\text{O}_{28}] \cdot 2\text{H}_2\text{O}$                                                                                                      |
| 409495       | 2.056 Å | Euler, H.; Barbier, B.; Klumpp, S.; Kirfel, A. <i>Z. Kristallogr.</i> <b>2000</b> , <i>215</i> , 473. $\text{Rb}_2[\text{Ni}(\text{H}_2\text{O})_6](\text{SO}_4)_2$                                                                                                                                                                           |
| 412263       | 2.056 Å | Fleck, M.; Bohaty, L.; Tillmanns, E. <i>Solid State Sci.</i> <b>2004</b> , <i>6</i> , 469. $(\text{C}(\text{NH}_2)_3)_2[\text{Ni}(\text{H}_2\text{O})_6](\text{SO}_4)_2$                                                                                                                                                                      |
| AFEYAN       | 2.056 Å | Martsinko, E. F.; Minacheva, L. K.; Chebanenko, E. A.; Seifullina, I. I.; Sergienko, V. S.; Churakov, A. <i>V. Zh. Neorg. Khim.</i> <b>2013</b> , <i>58</i> , 588. $[\text{Ni}(\text{H}_2\text{O})_6][\text{Sn}(\text{C}_6\text{H}_5\text{O}_7)_2] \cdot 4\text{H}_2\text{O}$                                                                 |
| AYODUP       | 2.056 Å | Baruah, J. B. CCDC deposition number 749994, <b>2016</b> . $[\text{Ni}(\text{H}_2\text{O})_6](\text{C}_7\text{H}_4\text{NO}_4)_2 \cdot 2(4\text{-NO}_2\text{C}_6\text{H}_4\text{COO}) \cdot 2\text{H}_2\text{O}$                                                                                                                              |
| CICHIG       | 2.056 Å | Hou, Y.-J.; Sun, Z.-Z.; Yu, Y.-H.; Li, B.-Y.; Hou, G.-F. <i>Acta Crystallogr., Sect. E</i> <b>2007</b> , <i>63</i> , m1519. $[\text{Ni}(\text{H}_2\text{O})_6](\text{C}_8\text{H}_6\text{NO}_5)_2 \cdot 5\text{H}_2\text{O}$                                                                                                                  |
| EGUNOL       | 2.056 Å | Tang, S.-F.; Li, L.-J.; Lv, X.-X.; Wang, C.; Zhao, X.-B. <i>CrystEngComm</i> <b>2014</b> , <i>16</i> , 7043. $[\text{Ni}(\text{H}_2\text{O})_6](1,4\text{-}(\text{PO}_3\text{H})_2\text{-}2,5\text{-}(\text{CH}_3)_2\text{C}_6\text{H}_2) \cdot 2\text{H}_2\text{O}$                                                                          |
| EKOYOU       | 2.056 Å | Bednarchuk, T. J.; Kinzhybalov, V.; Pietraszko, A. <i>Acta Crystallogr., Sect. C</i> <b>2016</b> , <i>72</i> , 432. $[\text{Ni}(\text{H}_2\text{O})_6](2\text{-NH}_2\text{-C}_5\text{H}_5\text{N})_2(\text{SO}_4)_2$                                                                                                                          |

|          |         |                                                                                                                                                                                                                                                                                                                                                                                                      |
|----------|---------|------------------------------------------------------------------------------------------------------------------------------------------------------------------------------------------------------------------------------------------------------------------------------------------------------------------------------------------------------------------------------------------------------|
| FIYLEH   | 2.056 Å | Bazhina, E. S.; Gogoleva, N. V.; Al4ksandrov, G. G.; Kiskin, M. A.; Efimov, N. N.; Bogomyakov, A. S.; Ugolkova, E. A.; Minin, V. V.; Sidorov, A. A., Eremenko, I. L. <i>Chem. Sel.</i> <b>2018</b> , <i>3</i> , 13765. [Ni(H <sub>2</sub> O) <sub>6</sub> ][Cu(H <sub>2</sub> O)(C <sub>6</sub> H <sub>6</sub> O <sub>6</sub> )]·2H <sub>2</sub> O                                                   |
| GUHMOO   | 2.056 Å | Liu, J.; Lu, Y.; Li, J.; Lu, W. <i>Dyes Pigm.</i> <b>2020</b> , <i>177</i> , 108266. [Ni(H <sub>2</sub> O) <sub>6</sub> ][NiC <sub>26</sub> H <sub>28</sub> N <sub>4</sub> O <sub>6</sub> ]·2H <sub>2</sub> O                                                                                                                                                                                        |
| NIGUAS01 | 2.056 Å | Fleck, M.; Bohaty, L.; Tillmanns, E. <i>Solid State Sci.</i> <b>2004</b> , <i>6</i> , 469. [Ni(H <sub>2</sub> O) <sub>6</sub> ](C(NH <sub>2</sub> ) <sub>3</sub> ) <sub>2</sub> (SO <sub>4</sub> ) <sub>2</sub>                                                                                                                                                                                      |
| NUMTIY   | 2.056 Å | Zhiqiang Xu; Thompson, L. K.; Miller, D. O.; Clase, H. J.; Howard, J. A. K.; Goeta, A. E. <i>Inorg. Chem.</i> <b>1998</b> , <i>37</i> , 3620. [Ni(H <sub>2</sub> O) <sub>6</sub> ][Ni <sub>2</sub> C <sub>36</sub> H <sub>36</sub> N <sub>18</sub> ](NO <sub>3</sub> ) <sub>6</sub> ·4.5H <sub>2</sub> O                                                                                             |
| NANPIC   | 2.056 Å | Kong, D.; Clearfield, A. <i>Cryst. Growth Des.</i> <b>2005</b> , <i>5</i> , 1263. [Ni(H <sub>2</sub> O) <sub>6</sub> ][Ni(H <sub>2</sub> O) <sub>3</sub> (C <sub>6</sub> H <sub>3</sub> NO <sub>3</sub> ) <sub>2</sub> ]·5H <sub>2</sub> O                                                                                                                                                           |
| PAHXIF01 | 2.056 Å | Rochon, F. R.; Massarweh, G. <i>Inorg. Chim. Acta</i> <b>2000</b> , <i>304</i> , 190. [Ni(H <sub>2</sub> O) <sub>6</sub> ](C <sub>10</sub> H <sub>4</sub> O <sub>8</sub> )                                                                                                                                                                                                                           |
| POGQEK   | 2.056 Å | Mohan, M.; Rajak, S.; Tremblay, A. A.; Maris, T.; Duong, A. <i>Dalton Trans.</i> <b>2019</b> , <i>48</i> , 7006. [Ni(H <sub>2</sub> O) <sub>6</sub> ] <sub>0.92</sub> [Zn(H <sub>2</sub> O) <sub>6</sub> ] <sub>0.08</sub> [NiC <sub>12</sub> H <sub>10</sub> N <sub>14</sub> O <sub>10</sub> ] <sub>0.49</sub> [MnC <sub>12</sub> H <sub>10</sub> N <sub>14</sub> O <sub>10</sub> ] <sub>0.51</sub> |
| POPBUT   | 2.056 Å | Held, P. <i>Acta Crystallogr., Sect. E</i> <b>2014</b> , <i>70</i> , 403. ((CH <sub>3</sub> ) <sub>2</sub> NH <sub>2</sub> ) <sub>2</sub> [Ni(H <sub>2</sub> O) <sub>6</sub> ](SO <sub>4</sub> ) <sub>2</sub> ·2H <sub>2</sub> O                                                                                                                                                                     |
| RITKOW   | 2.056 Å | Sahbani, T.; Smirani Sta, W.; Rzaigui, M. <i>Acta Crystallogr., Sect. E</i> <b>2014</b> , <i>70</i> , m6. [Ni(H <sub>2</sub> O) <sub>6</sub> ](4-NH <sub>2</sub> C <sub>5</sub> H <sub>5</sub> N) <sub>2</sub> (SO <sub>4</sub> ) <sub>2</sub>                                                                                                                                                       |
| TUTHUL   | 2.056 Å | Sileo, E. E.; de Araujo, A. S.; Rigott, G.; Piro, O. E.; Castellano, E. E. <i>J. Mol. Struct.</i> <b>2003</b> , <i>644</i> , 67. [Ni(H <sub>2</sub> O) <sub>6</sub> ][NiC <sub>14</sub> H <sub>10</sub> N <sub>2</sub> O <sub>10</sub> ]                                                                                                                                                             |
| TUFPAM   | 2.056 Å | Melanou, M.; Dakanali, M.; Raptopoulou, C. P.; Drouza, C.; Lalioti, N.; Salifoglou, A. <i>Polyhedron</i> <b>2009</b> , <i>28</i> , 3331. [Ni(H <sub>2</sub> O) <sub>6</sub> ][Ni(C <sub>3</sub> H <sub>6</sub> NO <sub>5</sub> P)]·3.3H <sub>2</sub> O                                                                                                                                               |
| 63026    | 2.057 Å | Maslen, E. N.; Ridout, S. C.; Watson, K. J.; Moore, F. H. <i>Acta Crystallogr., Sect. C</i> <b>1988</b> , <i>44</i> , 412. (NH <sub>4</sub> ) <sub>2</sub> [Ni(H <sub>2</sub> O) <sub>6</sub> ](SO <sub>4</sub> ) <sub>2</sub>                                                                                                                                                                       |
| 63027    | 2.057 Å | Maslen, E. N.; Ridout, S. C.; Watson, K. J.; Moore, F. H. <i>Acta Crystallogr., Sect. C</i> <b>1988</b> , <i>44</i> , 412. (NH <sub>4</sub> ) <sub>2</sub> [Ni(H <sub>2</sub> O) <sub>6</sub> ](SO <sub>4</sub> ) <sub>2</sub>                                                                                                                                                                       |
| 409749   | 2.057 Å | Euler, H.; Barbier, B.; Meents, A.; Kirfel, A. <i>Z. Kristallogr. – New Cryst. Struct.</i> <b>2003</b> , <i>218</i> , 405. Cs <sub>2</sub> [Ni(H <sub>2</sub> O) <sub>6</sub> ](SeO <sub>4</sub> ) <sub>2</sub>                                                                                                                                                                                      |
| 418857   | 2.057 Å | Liu, F.; Marchal- Roch, C. Dambournet, D.; Acker, A.; Marrot, J.; Secheresse, F. <i>Eur. J. Inorg. Chem.</i> <b>2008</b> , 2191. [Ni(H <sub>2</sub> O) <sub>6</sub> ][Ag <sub>2</sub> (Ni(OH) <sub>6</sub> Mo <sub>6</sub> O <sub>18</sub> )·8H <sub>2</sub> O                                                                                                                                       |
| 429170   | 2.057 Å | Breternitz, J.; Farrugia, L. J.; Godula-Jopek, A.; Saremi-Yarahmadi, S.; Malka, I. E.; Hoang, T. K. A.; Gregory, D. H. <i>J. Cryst. Growth</i> <b>2015</b> , <i>412</i> , 1. [Ni(H <sub>2</sub> O) <sub>6</sub> ](NO <sub>3</sub> ) <sub>2</sub>                                                                                                                                                     |
| BEMXAT   | 2.057 Å | Piggot, P. M. T.; Hall, L. A.; White, A. J. P.; Williams, D. J.; Thompson, L. K. <i>Inorg. Chem.</i> <b>2004</b> , <i>43</i> , 1167. [Ni(H <sub>2</sub> O) <sub>6</sub> ](C <sub>11</sub> H <sub>7</sub> O <sub>4</sub> ) <sub>2</sub>                                                                                                                                                               |
| HAHYUL   | 2.057 Å | Dalgarno, S. J.; Hardie, M. J.; Atwood, J. L.; Raston, C. L. <i>Inorg. Chem.</i> <b>2004</b> , <i>43</i> , 6351. [Ni(H <sub>2</sub> O) <sub>6</sub> ] <sub>3</sub> (C <sub>42</sub> H <sub>30</sub> O <sub>24</sub> S <sub>6</sub> )·2C <sub>5</sub> H <sub>5</sub> NO·7H <sub>2</sub> O                                                                                                             |

|         |         |                                                                                                                                                                                                                                                                                                                                             |
|---------|---------|---------------------------------------------------------------------------------------------------------------------------------------------------------------------------------------------------------------------------------------------------------------------------------------------------------------------------------------------|
| SAHPOH  | 2.057 Å | Kong, D.; Medvedev, D. G.; Clearfield, A. <i>Inorg. Chem.</i> <b>2004</b> , <i>43</i> , 7308.<br>[Ni(H <sub>2</sub> O) <sub>6</sub> ][Ni(C <sub>12</sub> H <sub>28</sub> N <sub>4</sub> O <sub>12</sub> P <sub>4</sub> )·2C <sub>5</sub> H <sub>5</sub> NO·7H <sub>2</sub> O                                                                |
| WUTGUN  | 2.057 Å | Craven, E.; Abu-Shandi, K.; Janiak, C. <i>Z. Anorg. Allg. Chem.</i> <b>2003</b> , <i>629</i> , 195.<br>(C <sub>4</sub> H <sub>12</sub> N <sub>2</sub> )[Ni(H <sub>2</sub> O) <sub>6</sub> ](HPO <sub>4</sub> ) <sub>2</sub>                                                                                                                 |
| 2428    | 2.058 Å | Elerman, Y.; Uraz, A. A.; Armagan, N. <i>Acta Crystallogr., Sect. B</i> <b>1978</b> , <i>34</i> , 3330. [Ni(H <sub>2</sub> O) <sub>6</sub> ] <sub>2</sub> SO <sub>6</sub>                                                                                                                                                                   |
| 11436   | 2.058 Å | Ayer, G. B.; Klepov, V. V.; Smith, M. D.; zur Loye, H.-C. <i>Inorg. Chem.</i> <b>2019</b> , <i>58</i> , 13049.<br>[Ni(H <sub>2</sub> O) <sub>6</sub> ][Hf <sub>2</sub> F <sub>12</sub> ]                                                                                                                                                    |
| 59149   | 2.058 Å | Jouini, A.; Dabbabi, M., <i>Acta Crystallogr., Sect. C</i> <b>1986</b> , <i>42</i> , 266. Na <sub>4</sub> [Ni(H <sub>2</sub> O) <sub>6</sub> ](P <sub>3</sub> O <sub>9</sub> ) <sub>2</sub>                                                                                                                                                 |
| 63072   | 2.058 Å | Jouini, A.; Dabbabi, M. <i>Acta Crystallogr., Sect. C</i> <b>1986</b> , <i>42</i> , 268. Na <sub>4</sub> [Ni(H <sub>2</sub> O) <sub>6</sub> ](P <sub>3</sub> O <sub>9</sub> ) <sub>2</sub>                                                                                                                                                  |
| 64876   | 2.058 Å | Treushnikov, E. N.; Kuskov, V. I.; Soboleva, L. V.; Belov, N. V. <i>Kristallografiya</i> <b>1978</b> , <i>23</i> , 30.<br>(NH <sub>4</sub> ) <sub>2</sub> [Ni(H <sub>2</sub> O) <sub>6</sub> ](SO <sub>4</sub> ) <sub>2</sub>                                                                                                               |
| 71561   | 2.058 Å | Berraho, M.; R'Kha, C.; Vegas, A.; Rafiq, M. <i>Acta Crystallogr., Sect. C</i> <b>1992</b> , <i>48</i> , 1350.<br>(NH <sub>4</sub> ) <sub>2</sub> [Ni(H <sub>2</sub> O) <sub>6</sub> ](PO <sub>3</sub> F) <sub>2</sub>                                                                                                                      |
| 74552   | 2.058 Å | Tahirov, T. H.; Lu, T.-H.; Huang, C.-C.; Chung, C.-S., <i>Acta Crystallogr., Sect. C</i> <b>1994</b> , <i>50</i> , 668.<br>(NH <sub>4</sub> ) <sub>2</sub> [Ni(H <sub>2</sub> O) <sub>6</sub> ](SO <sub>4</sub> ) <sub>2</sub>                                                                                                              |
| 78995   | 2.058 Å | Zhang, Z.; Suchanek, E.; Esser, D.; Lutz, H. D.; Nikolova, D.; Maneva-Petrova, M. <i>Z. Anorg. Allg. Chem.</i> <b>1996</b> , <i>622</i> , 845. [Ni(H <sub>2</sub> O) <sub>6</sub> ](H <sub>3</sub> IO <sub>6</sub> ) <sub>2</sub>                                                                                                           |
| 79718   | 2.058 Å | Abrahams, I.; Donaldson, J. D.; Khan, Z. I. <i>Acta Crystallogr., Sect. C</i> <b>1995</b> , <i>51</i> , 345. [Ni(H <sub>2</sub> O) <sub>6</sub> ][SnF <sub>3</sub> ] <sub>2</sub>                                                                                                                                                           |
| 172401  | 2.058 Å | Rudneva, E. B.; Manomenova, V. L.; Malakhova, L. F. Voloshin, A. E.; Smirnova, T. N. <i>Kristallografiya</i> <b>2006</b> , <i>51</i> , 372. Cs <sub>2</sub> [Ni(H <sub>2</sub> O) <sub>6</sub> ](SO <sub>4</sub> ) <sub>2</sub>                                                                                                             |
| 409114  | 2.058 Å | Staples, R. J.; Hatfield, T. L.; Peirce, D. T. <i>Z. Kristallogr.</i> <b>1998</b> , <i>213</i> , 243. [Ni(H <sub>2</sub> O) <sub>6</sub> ](ClO <sub>4</sub> ) <sub>2</sub> ·2H <sub>2</sub> O                                                                                                                                               |
| 409741  | 2.058 Å | Euler, H.; Barbier, B.; Meents, A.; Kirfel, A. <i>Z. Kristallogr. – New Cryst. Struct.</i> <b>2003</b> , <i>218</i> , 409.<br>Cs <sub>2</sub> [Ni(H <sub>2</sub> O) <sub>6</sub> ](SO <sub>4</sub> ) <sub>2</sub>                                                                                                                           |
| 710000  | 2.058 Å | Euler, H.; Barbier, B.; Meents, A.; Kirfel, A. <i>Z. Kristallogr. – New Cryst. Struct.</i> <b>2009</b> , <i>224</i> , 351.<br>K <sub>2</sub> [Ni(H <sub>2</sub> O) <sub>6</sub> ](SeO <sub>4</sub> ) <sub>2</sub>                                                                                                                           |
| AWELEU  | 2.058 Å | Pan, T.; Liang, Q.; Liu, D.; Huang, C. <i>J. Chem. Cryst.</i> <b>2011</b> , <i>41</i> , 1133.<br>[Ni(H <sub>2</sub> O) <sub>6</sub> ][NiC <sub>12</sub> H <sub>16</sub> NO <sub>10</sub> ] <sub>2</sub> ·4.3H <sub>2</sub> O                                                                                                                |
| AXUKAG  | 2.058 Å | Rousseau, G.; Oms, O.; Dolbecq, A.; Marrot, J.; Mialane, P. <i>Inorg. Chem.</i> <b>2011</b> , <i>50</i> , 7376.<br>K <sub>54</sub> Na <sub>4</sub> [Ni(H <sub>2</sub> O) <sub>6</sub> ] <sub>3</sub> [Ni <sub>16</sub> Si <sub>4</sub> W <sub>36</sub> C <sub>30</sub> H <sub>48</sub> O <sub>172</sub> ] <sub>2</sub> ·152H <sub>2</sub> O |
| CAKPIP  | 2.058 Å | Wang, R.-X.; Qi, Y.-J.; Yuan, X.-D. <i>Fenzi Kexue Xuebao</i> <b>2010</b> , <i>26</i> , 163.<br>[Ni(H <sub>2</sub> O) <sub>6</sub> ][NiC <sub>42</sub> H <sub>30</sub> N <sub>4</sub> O <sub>16</sub> ] <sub>2</sub> ·4H <sub>2</sub> O                                                                                                     |
| DUQGGAZ | 2.058 Å | Das, D.; Bhattacharjee, M. <i>Polyhedron</i> <b>2015</b> , <i>99</i> , 122.<br>[Ni(H <sub>2</sub> O) <sub>6</sub> ][Mo <sub>2</sub> C <sub>28</sub> H <sub>38</sub> N <sub>2</sub> O <sub>13</sub> ] <sub>2</sub> ·2(CH <sub>3</sub> ) <sub>2</sub> NCHO·H <sub>2</sub> O                                                                   |

|          |         |                                                                                                                                                                                                                                                                                              |
|----------|---------|----------------------------------------------------------------------------------------------------------------------------------------------------------------------------------------------------------------------------------------------------------------------------------------------|
| NIHSAY   | 2.058 Å | Gunderman, B. J.; Kabell, I. D.; Squattrito, P. J.; Dubey, S. N. <i>Inorg. Chim. Acta</i> <b>1997</b> , 258, 237.<br>[Ni(H <sub>2</sub> O) <sub>6</sub> ](C <sub>10</sub> H <sub>8</sub> NO <sub>6</sub> S <sub>2</sub> ) <sub>2</sub> ·4H <sub>2</sub> O                                    |
| NOSRUL   | 2.058 Å | Skelton, B. W.; Kokozay, V. N.; Vassilyeva, O. Y.; Buvaylo, E. A. CCDC deposition number 1960023, <b>2019</b> . [Ni(H <sub>2</sub> O) <sub>6</sub> ](C <sub>13</sub> H <sub>12</sub> N <sub>3</sub> ) <sub>2</sub> Cl <sub>4</sub> ·4H <sub>2</sub> O                                        |
| QUKLIT   | 2.058 Å | Thuery, P.; Harrowfield, J. <i>Polyhedron</i> <b>2015</b> , 98, 5. [Ni(H <sub>2</sub> O) <sub>6</sub> ][UO <sub>2</sub> (C <sub>12</sub> H <sub>6</sub> O <sub>14</sub> )·1.5H <sub>2</sub> O                                                                                                |
| YAGCIT01 | 2.058 Å | Ibragimov, A. B.; Englert, U.; Ashurov, J. M.; Wang, A. <i>Zh. Strukt. Khim.</i> <b>2018</b> , 59, 411. [Ni(H <sub>2</sub> O) <sub>6</sub> ](4-NO <sub>2</sub> -C <sub>6</sub> H <sub>4</sub> COO) <sub>2</sub> ·2H <sub>2</sub> O                                                           |
| ZOPGAO   | 2.058 Å | Kammoun, O.; Naili, H.; Rekik, W.; Bataille, T.; Mhiri, T. CCDC deposition number 1033936, <b>2014</b> .<br>[Ni(H <sub>2</sub> O) <sub>6</sub> ](C <sub>7</sub> H <sub>7</sub> N <sub>2</sub> ) <sub>2</sub> (SO <sub>4</sub> ) <sub>2</sub> ·4H <sub>2</sub> O                              |
| 16228    | 2.059 Å | Fuess, H. <i>Z. Anorg. Allg. Chem.</i> <b>1970</b> , 379, 204. [Ni(H <sub>2</sub> O) <sub>6</sub> ]SeO <sub>4</sub>                                                                                                                                                                          |
| 65018    | 2.059 Å | Angel, R. J.; Finger, L. W. <i>Acta Crystallogr., Sect. C</i> <b>1988</b> , 44, 1869. [Ni(H <sub>2</sub> O) <sub>6</sub> ]SO <sub>4</sub>                                                                                                                                                    |
| 99951    | 2.059 Å | Fleck, M.; Bohaty, L.; Tillmanns, E. <i>Z. Solid State Sci.</i> <b>2004</b> , 6, 469. (C(NH <sub>2</sub> ) <sub>3</sub> ) <sub>2</sub> [Ni(H <sub>2</sub> O) <sub>6</sub> ](SO <sub>4</sub> ) <sub>2</sub>                                                                                   |
| 234573   | 2.059 Å | Karadjova, V.; Wildner, M.; Stoilova, D. <i>Int. Res. Pure Appl. Chem.</i> <b>2015</b> , 5, 245.<br>Rb <sub>1.605</sub> (NH <sub>4</sub> ) <sub>0.395</sub> [Ni(H <sub>2</sub> O) <sub>6</sub> ](SO <sub>4</sub> ) <sub>2</sub>                                                              |
| 409591   | 2.059 Å | Fleck, M.; Kolitsch, U. <i>Z. Kristallogr.</i> <b>2002</b> , 217, 15. Rb <sub>2</sub> [Ni(H <sub>2</sub> O) <sub>6</sub> ](SeO <sub>4</sub> ) <sub>2</sub>                                                                                                                                   |
| CIVCAN   | 2.059 Å | Shi, J.; Wang, Y.-C.; Wang, Q.-Y.; Zhang, Z.-T. <i>Inorg. Chim. Acta</i> <b>2014</b> , 409, 259.<br>[Ni(H <sub>2</sub> O) <sub>6</sub> ](C <sub>17</sub> H <sub>12</sub> BrO <sub>9</sub> S) <sub>2</sub> ·2H <sub>2</sub> O                                                                 |
| COCXUO   | 2.059 Å | Zhang, S.-G.; Feng, Y.-L.; Wen, Y.-H. <i>Wuji Huaxue Xuebao</i> <b>2008</b> , 24, 581. [Ni(H <sub>2</sub> O) <sub>6</sub> ](C <sub>9</sub> H <sub>7</sub> N <sub>4</sub> O <sub>3</sub> S) <sub>2</sub>                                                                                      |
| QOSJIU   | 2.059 Å | Tu, X.; Chen, H.; Zhang, S.; Ma, P. <i>J. Cluster Sci.</i> <b>2019</b> , 10.1007/s10876-019-01726-1.<br>[Ni(H <sub>2</sub> O) <sub>6</sub> ] <sub>2</sub> [Ni <sub>6</sub> C <sub>48</sub> H <sub>60</sub> N <sub>4</sub> O <sub>48</sub> ]·15H <sub>2</sub> O                               |
| SESSUF   | 2.059 Å | Gao, J.-S.; Li, B.-Y.; Hou, G.-F.; Hou, Y.-J.; Yan, P.-F. <i>Acta Crystallogr., Sect. E</i> <b>2006</b> , 62, m3473.<br>[Ni(H <sub>2</sub> O) <sub>6</sub> ](4-NO <sub>2</sub> -C <sub>6</sub> H <sub>4</sub> SCH <sub>2</sub> COOH) <sub>2</sub>                                            |
| YADGUH   | 2.059 Å | Schau-Magnussen, M. Gorbanev, Y. Y.; Kegnaes, S.; Riisager, A. <i>Acta Crystallogr., Sect. C</i> <b>2011</b> , 67, m327. [Ni(H <sub>2</sub> O) <sub>6</sub> ](C <sub>6</sub> H <sub>2</sub> O <sub>5</sub> )                                                                                 |
| 65019    | 2.060 Å | Angel, R. J.; Finger, L. W. <i>Acta Crystallogr., Sect. C</i> <b>1988</b> , 44, 1869. [Ni(H <sub>2</sub> O) <sub>6</sub> ]SO <sub>4</sub>                                                                                                                                                    |
| 161175   | 2.060 Å | Abrahams, B. F.; Haywood, M. G.; Robson, R. <i>Cryst Growth Des.</i> <b>2008</b> , 8, 1288.<br>[Na <sub>4</sub> (H <sub>2</sub> O) <sub>17</sub> ][Ni(H <sub>2</sub> O) <sub>6</sub> ][(Ni(H <sub>2</sub> O) <sub>2</sub> ] <sub>1.5</sub> [Cu(SO <sub>3</sub> ) <sub>4</sub> ] <sub>2</sub> |
| 234575   | 2.060 Å | Karadjova, V.; Wildner, M.; Stoilova, D. <i>Int. Res. Pure Appl. Chem.</i> <b>2015</b> , 5, 245.<br>Rb <sub>1.099</sub> (NH <sub>4</sub> ) <sub>0.991</sub> [Ni(H <sub>2</sub> O) <sub>6</sub> ](SeO <sub>4</sub> ) <sub>2</sub>                                                             |
| 239300   | 2.060 Å | Belogub, E. V.; Krivovichev, S. V.; Pekov, I. V.; Kuznetsov, A. M.; Yapaskurt, V. O.; Kotlyarov, V. A.; Chukanov, N. V.; Belakovskiy, D. I. <i>Miner. Petrology</i> <b>2015</b> , 109, 143. K <sub>2</sub> [Ni(H <sub>2</sub> O) <sub>6</sub> ]SO <sub>4</sub>                               |
| 403058   | 2.060 Å | Blachnik, R.; Wiest, T.; Duellmer, A.; Reuter, H. <i>Z. Kristallogr.</i> <b>1997</b> , 212, 20. (NH <sub>4</sub> ) <sub>2</sub> [Ni(H <sub>2</sub> O) <sub>6</sub> ](PO <sub>4</sub> ) <sub>2</sub>                                                                                          |

|          |         |                                                                                                                                                                                                                                                                                                                                                                          |
|----------|---------|--------------------------------------------------------------------------------------------------------------------------------------------------------------------------------------------------------------------------------------------------------------------------------------------------------------------------------------------------------------------------|
| ARONEB   | 2.060 Å | Tandon, S. S.; Dul, M.-C.; L.Lee, J.; Dawe, L.N.; Anwar, M. U.; Thompson, L. K. <i>Dalton Trans.</i> <b>2011</b> , 40, 3466. [Ni(H <sub>2</sub> O) <sub>6</sub> ] <sub>5</sub> [NiC <sub>28</sub> H <sub>30</sub> N <sub>16</sub> O <sub>20</sub> ] <sub>5</sub> (OH) <sub>2</sub> ·12CH <sub>3</sub> OH·32H <sub>2</sub> O                                              |
| CEJMEJ   | 2.060 Å | Cingi, M. B.; Lanfredi, A. M. M.; Tiripicchio, A. <i>Acta Crystallogr., Sect. B</i> <b>1984</b> , 40, 56. K <sub>2</sub> [Ni(H <sub>2</sub> O) <sub>6</sub> ](C <sub>8</sub> H <sub>5</sub> O <sub>4</sub> ) <sub>4</sub> ·4H <sub>2</sub> O                                                                                                                             |
| FITREF01 | 2.060 Å | Chen, Y.-G.; He, Z.-K. <i>Wuhan Dax. Xuebao, Zir. Kex.</i> <b>2005</b> , 51, 140. [Ni(H <sub>2</sub> O) <sub>6</sub> ][Ni <sub>2</sub> C <sub>18</sub> H <sub>28</sub> N <sub>4</sub> O <sub>14</sub> ] <sub>4</sub> ·4H <sub>2</sub> O                                                                                                                                  |
| GIDFUW   | 2.060 Å | Ronson, T. K.; Giri, C.; Beyeh, N. K.; Minkkinen, A.; Topic, F.; Holstein, J. J.; Rissanen, K.; Nitschke, J. R. <i>Chem. Eur. J.</i> <b>2013</b> , 19, 3374. [Ni(H <sub>2</sub> O) <sub>6</sub> ] <sub>2</sub> [Ni <sub>4</sub> C <sub>144</sub> H <sub>96</sub> N <sub>24</sub> O <sub>36</sub> S <sub>12</sub> ] <sub>2</sub> ·CCl <sub>4</sub> ·74.90H <sub>2</sub> O |
| KOFVOS   | 2.060 Å | Bai, Z.-S.; Ni, P.-Z.; Zheng, H.-D.; Zhao, S.-Y. <i>Z. Anorg. Allg. Chem.</i> <b>2014</b> , 640, 1437. [Ni(H <sub>2</sub> O) <sub>6</sub> ][Ni <sub>3</sub> C <sub>28</sub> H <sub>12</sub> N <sub>4</sub> O <sub>18</sub> ] <sub>2</sub> ·10H <sub>2</sub> O                                                                                                            |
| PUSMOH   | 2.060 Å | Le Thi Hong, H.; Nguyen Thi Ngoc, V.; Tran Thi, D.; Nguyen Bich, N.; Van Meervelt, L. <i>Acta Crystallogr., Sect. E</i> <b>2015</b> , 71, 1105. [Ni(H <sub>2</sub> O) <sub>6</sub> ](C <sub>11</sub> H <sub>8</sub> NO <sub>8</sub> S) <sub>2</sub> ·2H <sub>2</sub> O                                                                                                   |
| SETQUD   | 2.060 Å | Wolodkiewicz, W.; Brzyska, W.; Glowiak, T. <i>Pol. J. Chem.</i> <b>1996</b> , 70, 409. [Ni(H <sub>2</sub> O) <sub>6</sub> ](C <sub>7</sub> H <sub>3</sub> Cl <sub>2</sub> O <sub>2</sub> ) <sub>2</sub> ·[NiC <sub>14</sub> H <sub>14</sub> Cl <sub>4</sub> O <sub>8</sub> ] <sub>2</sub> ·3H <sub>2</sub> O                                                             |
| QOCPAA   | 2.060 Å | Kirillova, M. V.; Kirillov, A. M.; da Silva, M. F. C. G.; Kopylovich, M. N.; da Silva, J. J. R. F.; Pombeiro, A. J. L. <i>Inorg. Chim. Acta</i> <b>2008</b> , 361, 1728.                                                                                                                                                                                                 |
| SOFTUD   | 2.060 Å | Huang, L.; Chen, D.-B. <i>Z. Kristallogr.- New Cryst. Struct.</i> <b>2008</b> , 223, 163. [Ni(H <sub>2</sub> O) <sub>6</sub> ](C <sub>11</sub> H <sub>9</sub> N <sub>2</sub> O <sub>4</sub> ) <sub>2</sub> ·2H <sub>2</sub> O                                                                                                                                            |
| WURXUE   | 2.060 Å | Moneeb, A. M.; Alabdulrahman, A. M.; Bagabas, A. A.; Perkins, C. K.; Apblett, A.W. <i>Ceramics Int.</i> <b>2016</b> , 42, 1366. [Ni(H <sub>2</sub> O) <sub>6</sub> ][MoO <sub>2</sub> (C <sub>4</sub> H <sub>6</sub> O <sub>3</sub> ) <sub>2</sub> ]                                                                                                                     |
| YAXBEH   | 2.060 Å | Oleshkevich, E.; Vinas, C.; Romero, I.; Choquesillo-Lazarte, D.; Haukka, M.; Teixidor, F. <i>Inorg. Chem.</i> <b>2017</b> , 56, 5502. [Ni(H <sub>2</sub> O) <sub>6</sub> ](C <sub>10</sub> B <sub>10</sub> H <sub>12</sub> O <sub>2</sub> P) <sub>2</sub>                                                                                                                |
| 29009    | 2.061 Å | Bargouth, M. O.; Will, G. <i>Int. Centre for Theoretical Physics: Report IC/81/103</i> <b>1981</b> , 1. [Ni(H <sub>2</sub> O) <sub>6</sub> ] <sub>2</sub> SO <sub>4</sub>                                                                                                                                                                                                |
| 32513    | 2.061 Å | Leclaire, A.; Borel, M. M. <i>Acta Crystallogr., Sect. B</i> <b>1982</b> , 38, 234. [Ni(H <sub>2</sub> O) <sub>6</sub> ] <sub>2</sub> [CdCl <sub>6</sub> ]                                                                                                                                                                                                               |
| 47856    | 2.061 Å | Chi, M.; Li, H.; Xin, X.; Qin, L.; Lv, H.; Yang, G.-Y., <i>Inorg. Chem.</i> <b>2022</b> , 61, 8467-8476. KH[Ni(H <sub>2</sub> O) <sub>6</sub> ][NiMo <sub>6</sub> O <sub>24</sub> (Sb <sub>3</sub> O <sub>3</sub> ) <sub>2</sub> ] <sub>2</sub> ·5H <sub>2</sub> O                                                                                                       |
| 162316   | 2.061 Å | Bosi, F.; Belardi, G.; Ballirano, P. <i>Am. Miner.</i> <b>2009</b> , 94, 74. K <sub>2</sub> [Ni(H <sub>2</sub> O) <sub>6</sub> ](SO <sub>4</sub> ) <sub>2</sub>                                                                                                                                                                                                          |
| 171140   | 2.061 Å | Xie, A.-L.; Ma, C.-A.; Wang, L.-B. <i>Acta Crystallogr., Sect. E</i> <b>2006</b> , 62, i1. [Ni(H <sub>2</sub> O) <sub>6</sub> ] <sub>2</sub> [V <sub>10</sub> O <sub>28</sub> ] <sub>2</sub> ·4H <sub>2</sub> O                                                                                                                                                          |
| 411336   | 2.061 Å | Adamczyk, B.; Troyanov, S. I.; Schneider, M.; Kemnitz, E. <i>Z. Anorg. Allg. Chem.</i> <b>2000</b> , 626, 2543. NH <sub>4</sub> [Ni(H <sub>2</sub> O) <sub>6</sub> ][AlF <sub>6</sub> ]                                                                                                                                                                                  |
| 69588    | 2.061 Å | Blackburn, A. C.; Gallucci, J. C.; Gerkin, R. E. <i>Acta Crystallogr., Sect. C</i> <b>1991</b> , 47, 1786. [Ni(H <sub>2</sub> O) <sub>6</sub> ](BrO <sub>4</sub> ) <sub>2</sub> .                                                                                                                                                                                        |

|        |         |                                                                                                                                                                                                                                                                                                                                                                                   |
|--------|---------|-----------------------------------------------------------------------------------------------------------------------------------------------------------------------------------------------------------------------------------------------------------------------------------------------------------------------------------------------------------------------------------|
| EJAMIL | 2.061 Å | Ma, C.; Chen, C.; Chen, F.; Zhang, X.; Zhu, H.; Liu, Q.; Liao, D.; Li, L. <i>Bull. Chem. Soc. Jpn.</i> <b>2003</b> , <i>76</i> , 301. [Ni(H <sub>2</sub> O) <sub>6</sub> ][K <sub>2</sub> Ni <sub>2</sub> C <sub>42</sub> H <sub>26</sub> N <sub>6</sub> O <sub>26</sub> ] $\cdot$ 2H <sub>2</sub> O                                                                              |
| ESIWAG | 2.061 Å | Le Thi Hong, H.; Nguyen Thi Ngoc, V.; Do Thi Van, A.; Van Meervelt, L. <i>Acta Crystallogr. Sect. E</i> <b>2016</b> , <i>72</i> , 1242. [Ni(H <sub>2</sub> O) <sub>6</sub> ](C <sub>12</sub> H <sub>12</sub> BrN <sub>2</sub> O <sub>5</sub> S) <sub>2</sub> $\cdot$ H <sub>2</sub> O                                                                                             |
| FITREF | 2.061 Å | Li; D.-F.; Liao; Z.-R.; Xiong, Y. <i>Acta Crystallogr., Sect. C</i> <b>1999</b> , <i>55</i> , 9900058. [Ni(H <sub>2</sub> O) <sub>6</sub> ][Ni <sub>2</sub> C <sub>18</sub> H <sub>28</sub> N <sub>4</sub> O <sub>14</sub> ] $\cdot$ 4H <sub>2</sub> O                                                                                                                            |
| GIDFOQ | 2.061 Å | Ronson, T. K.; Giri, C.; Beyeh, N. K.; Minkkinen, A.; Topic, F.; Holstein, J. J.; Rissanen, K.; Nitschke, J. R. <i>Chem. Eur. J.</i> <b>2013</b> , <i>19</i> , 3374. [Ni(H <sub>2</sub> O) <sub>6</sub> ] <sub>2</sub> [Ni <sub>4</sub> C <sub>144</sub> H <sub>96</sub> N <sub>24</sub> O <sub>36</sub> S <sub>12</sub> ] $\cdot$ CBr <sub>4</sub> $\cdot$ 74.76H <sub>2</sub> O |
| IDAGIF | 2.061 Å | Hajlaoui, F.; Naili, H.; Yahyaoui, S.; Turnbull, M. M.; Mhiri, T.; Bataille, T. <i>Dalton Trans.</i> <b>2011</b> , <i>40</i> , 11613. [Ni(H <sub>2</sub> O) <sub>6</sub> ](C <sub>5</sub> H <sub>14</sub> N <sub>2</sub> )(SO <sub>4</sub> ) <sub>2</sub>                                                                                                                         |
| NARKOI | 2.061 Å | Yoshida, R.; Ogasahara, S.; Akashi, H.; Shibahara, T. <i>Inorg. Chim. Acta.</i> <b>2012</b> , <i>383</i> , 157. [Ni(H <sub>2</sub> O) <sub>6</sub> ][Mo <sub>2</sub> C <sub>6</sub> H <sub>10</sub> N <sub>2</sub> O <sub>6</sub> S <sub>4</sub> ] $\cdot$ 8H <sub>2</sub> O                                                                                                      |
| NOWTOK | 2.061 Å | Said, S.; Kolsi, R. B. A.; Naili, H. <i>J. Organometal. Chem.</i> <b>2016</b> , <i>809</i> , 45. [Ni(H <sub>2</sub> O) <sub>6</sub> ](C <sub>6</sub> H <sub>9</sub> N <sub>2</sub> )(SO <sub>4</sub> ) <sub>2</sub> $\cdot$ 2H <sub>2</sub> O                                                                                                                                     |
| NUHRUE | 2.061 Å | Indrani, M.; Ramasubramanian, R.; Fronczek, F. R.; Braga, D.; Vasanthacharya, N. Y.; Kumaresan, S. <i>J. Chem. Sci. (Bangalore)</i> <b>2009</b> , <i>121</i> , 403. [Ni(H <sub>2</sub> O) <sub>6</sub> ](C <sub>8</sub> H <sub>8</sub> NO <sub>3</sub> S) <sub>2</sub>                                                                                                            |
| RADZUU | 2.061 Å | Gao, S.-M.; Xu, Z.-H.; Ye, L.-W.; Su, G.-B.; Zhuang, X.-X. <i>Jiegou Huaxue</i> <b>2015</b> , <i>34</i> , 1682. [Ni(H <sub>2</sub> O) <sub>6</sub> ][Ni(H <sub>2</sub> O) <sub>2</sub> (C <sub>6</sub> H <sub>12</sub> N <sub>4</sub> ) <sub>2</sub> ](SO <sub>4</sub> ) <sub>2</sub> $\cdot$ 6H <sub>2</sub> O                                                                   |
| VAQDIC | 2.061 Å | Hajlaoui, F.; Naili, H.; Yahyaoui, S.; Norquist, A. J.; Mhiri, T.; Bataille, T. <i>J. Organometal. Chem.</i> <b>2012</b> , <i>700</i> , 110. [Ni(H <sub>2</sub> O) <sub>6</sub> ](C <sub>5</sub> H <sub>14</sub> N <sub>2</sub> )(SO <sub>4</sub> ) <sub>2</sub>                                                                                                                  |
| 4308   | 2.062 Å | Hodgson, P. G.; Whitnall, J.; Kennard, C. H. L.; Moore, F. H. <i>Cryst. Struct. Commun.</i> <b>1975</b> , <i>4</i> , 713. K <sub>2</sub> [Ni(H <sub>2</sub> O) <sub>6</sub> ](SO <sub>4</sub> ) <sub>2</sub>                                                                                                                                                                      |
| 29828  | 2.062 Å | Liu, Y.; Deng, J.-X.; Pan, C.-Y. <i>J. Cluster Sci.</i> <b>2021</b> , <i>32</i> , 469. [Ni(H <sub>2</sub> O) <sub>6</sub> ](NO <sub>3</sub> ) <sub>2</sub> $\cdot$ [Ni(B <sub>3</sub> O <sub>3</sub> (OH) <sub>4</sub> ) <sub>2</sub> (H <sub>2</sub> O) <sub>4</sub> ] $\cdot$ 2H <sub>2</sub> O                                                                                 |
| 62376  | 2.062 Å | Chattopadhyay, T. K.; Devreux, F.; Peters, K.; Gmelin, E.; Ghosh, B. <i>J. Phys. C</i> <b>1988</b> , <i>21</i> , 1321. [Ni(H <sub>2</sub> O) <sub>6</sub> ] <sub>2</sub> [SiF <sub>6</sub> ]                                                                                                                                                                                      |
| 409844 | 2.062 Å | Wang, X.-W.; Wang, P.; Zheng, Y.-Q. <i>Kristallogr.-New Cryst. Struct.</i> <b>2000</b> , <i>215</i> , 101. [Ni(H <sub>2</sub> O) <sub>6</sub> ]HPO <sub>4</sub> $\cdot$ H <sub>2</sub> O                                                                                                                                                                                          |
| AMIHOW | 2.062 Å | Liu, Y.; Deng, J.-X.; Pan, C.-Y. <i>J. Cluster Sci.</i> <b>2021</b> , <i>32</i> , 469. [Ni(H <sub>2</sub> O) <sub>6</sub> ](NO <sub>3</sub> ) <sub>2</sub> $\cdot$ [Ni(H <sub>2</sub> O) <sub>4</sub> (B <sub>3</sub> H <sub>4</sub> O <sub>7</sub> ) <sub>2</sub> ] $\cdot$ 2H <sub>2</sub> O                                                                                    |
| DOBCOM | 2.062 Å | Aghabozorg, H.; Palenik, R. C.; Palenik, G. J. <i>Inorg. Chem.</i> <b>1985</b> , <i>24</i> , 4214. [Ni(H <sub>2</sub> O) <sub>6</sub> ](C <sub>30</sub> H <sub>12</sub> N <sub>6</sub> ) $\cdot$ 5H <sub>2</sub> O                                                                                                                                                                |

|          |         |                                                                                                                                                                                                                                                                                           |
|----------|---------|-------------------------------------------------------------------------------------------------------------------------------------------------------------------------------------------------------------------------------------------------------------------------------------------|
| GAMLAL   | 2.062 Å | Joliat, E.; Mosberger, M.; Weder, N.; Spingler, B.; Probst, B.; Alberto, R. <i>Chimia</i> <b>2021</b> , 75, 180.<br>[Ni(H <sub>2</sub> O) <sub>6</sub> ] <sub>2</sub> [Ni <sub>2</sub> C <sub>44</sub> H <sub>28</sub> N <sub>8</sub> ](SO <sub>4</sub> ) <sub>4</sub> ·5H <sub>2</sub> O |
| PEVXUM   | 2.062 Å | Santoso, S. P.; Ismadji, S.; Angkawijaya, A. E.; Soetaredjo, F. E.; Go, A. W.; Ju, Y. H. <i>J. Mol. Liq.</i> <b>2016</b> , 221, 617. [Ni(H <sub>2</sub> O) <sub>6</sub> ](2,6-(OH) <sub>2</sub> C <sub>6</sub> H <sub>3</sub> COO) <sub>2</sub> ·2H <sub>2</sub> O                        |
| RENROS   | 2.062 Å | Kumaresan, S.; Ramadevi, P.; Walsh, R. D.; McAneny, A.; Lake, C. H. <i>J. Chem. Sci. Bangladore</i> <b>2006</b> , 118, 243. [Ni(H <sub>2</sub> O) <sub>6</sub> ](C <sub>7</sub> H <sub>6</sub> NO <sub>3</sub> S) <sub>2</sub>                                                            |
| UTEMAI   | 2.062 Å | Shao, Y.; Lin, H.; Su, Y.-Q.; Li, C.-X.; Ling, S.-Q.; Zhu, D.-S.; Liu, Q. <i>Dongbei Shi-Daxuebao Ziran Kexueban</i> <b>2005</b> , 37, 61. [Ni(H <sub>2</sub> O) <sub>6</sub> ](C <sub>6</sub> H <sub>5</sub> O <sub>4</sub> S <sub>2</sub> ) <sub>2</sub>                                |
| VAQFEA   | 2.062 Å | Hajlaoui, F.; Naili, H.; Yahyaoui, S.; Norquist, A. J.; Mhiri, T.; Bataille, T. <i>J. Organometal Chem.</i> <b>2012</b> , 700, 110. [Ni(H <sub>2</sub> O) <sub>6</sub> ](C <sub>5</sub> H <sub>14</sub> N <sub>2</sub> )(SO <sub>4</sub> ) <sub>2</sub>                                   |
| WOHBUQ   | 2.062 Å | Haussuhl, E.; Giester, G.; Tillmanns, E. <i>Z. Kristallogr.-New Cryst. Struct.</i> <b>2000</b> , 215, 101.<br>(C(NH <sub>2</sub> ) <sub>3</sub> ) <sub>2</sub> [Ni(H <sub>2</sub> O) <sub>6</sub> ][Zr(C <sub>6</sub> H <sub>6</sub> NO <sub>6</sub> ) <sub>2</sub> ]·6H <sub>2</sub> O   |
| ZZZPAW01 | 2.062 Å | Morris, J. E.; Squattrito, P. J.; Kirschbaum, K.; Pinkerton, A. A. <i>J. Chem. Cryst.</i> <b>2003</b> , 33, 307. .<br>[Ni(H <sub>2</sub> O) <sub>6</sub> ](C <sub>10</sub> H <sub>8</sub> NO <sub>3</sub> S) <sub>2</sub> ·6H <sub>2</sub> O                                              |
| 9127     | 2.063 Å | Bigoli, F.; Braibanti, A.; Tiripicchio, A.; Tiripicchio Camellini, M. <i>Acta Crystallogr. Sect. B</i> <b>1971</b> , 27, 1427. [Ni(H <sub>2</sub> O) <sub>6</sub> ](NO <sub>3</sub> ) <sub>2</sub>                                                                                        |
| 20924    | 2.063 Å | Shchegoleva, T. M.; Iskhakova, L. D.; Ovanisyan, S. M.; Shakhnazaryan, A. A.; Trunov, V. K. <i>Zh. Neorg. Khim.</i> <b>1983</b> , 28, 2271. [Ni(H <sub>2</sub> O) <sub>6</sub> ][SbF <sub>4</sub> ] <sub>2</sub>                                                                          |
| 92161    | 2.063 Å | Ishaque Khan, M.; Tabussum, S.; Zheng, C. <i>Synthesis and Reactivity in Inorganic and Metal-Organic Chemistry</i> <b>2000</b> , 30, 1773. (H <sub>3</sub> O) <sub>2</sub> [Ni(H <sub>2</sub> O) <sub>6</sub> ][V <sub>10</sub> O <sub>28</sub> H <sub>10</sub> ]·4H <sub>2</sub> O       |
| 200304   | 2.063 Å | Treushnikov, E. N.; Kuskov, V. I.; Soboleva, L. V.; Belov, N. V. <i>Kristallografiya</i> <b>1978</b> , 23, 30.<br>(NH <sub>4</sub> ) <sub>2</sub> [Ni(H <sub>2</sub> O) <sub>6</sub> ](SO <sub>4</sub> ) <sub>2</sub>                                                                     |
| 261154   | 2.063 Å | Oudahmane, A.; Mnaouer, N.; El-Ghozzi, M.; Avignant, D. <i>Acta Crystallogr. Sect. E</i> <b>2011</b> , 67, i6.<br>K <sub>2</sub> [Ni(H <sub>2</sub> O) <sub>6</sub> ][ZrF <sub>6</sub> ]                                                                                                  |
| FIKCUZ   | 2.063 Å | Chen, M.; Chen, M.-Z.; Zhou, C.-Q.; Lin, W.-E.; Chen, J.-X.; Chen, W.-H.; Jiang, Z.-H. <i>Inorg. Chim Acta</i> <b>2013</b> , 405, 461. [Ni(H <sub>2</sub> O) <sub>6</sub> ](C <sub>14</sub> H <sub>10</sub> NO <sub>4</sub> ) <sub>2</sub> ·4H <sub>2</sub> O                             |
| MAZKUX   | 2.063 Å | Ruzmetov, A.; Ibragimov, A.; Ashurov, J.; Boltaeva, Z.; Ibragimov, B.; Usmanov, S. <i>Acta Crystallogr., Sect. E</i> <b>2022</b> , 78, 660. [Ni(H <sub>2</sub> O) <sub>6</sub> ](p-OOCC <sub>6</sub> H <sub>4</sub> OH) <sub>2</sub> ·2H <sub>2</sub> O                                   |
| SIYZEF   | 2.063 Å | Bernadinelli, G.; Lucken, E. A. C.; Costines, M. Z. <i>Kristallogr.</i> <b>1991</b> , 195, 139. [Ni(H <sub>2</sub> O) <sub>6</sub> ](C <sub>6</sub> H <sub>4</sub> ClO <sub>3</sub> S) <sub>2</sub>                                                                                       |
| ZADTAC   | 2.063 Å | An, H.; Wang, L.; Hu, Y.; Xu, T.; Hou, Y. <i>Inorg. Chem.</i> <b>2016</b> , 55, 144.<br>[Ni(H <sub>2</sub> O) <sub>6</sub> ](C <sub>8</sub> H <sub>8</sub> NO <sub>2</sub> ) <sub>4</sub> [Co <sub>2</sub> Mo <sub>10</sub> H <sub>4</sub> O <sub>38</sub> ]·5H <sub>2</sub> O            |
| 11558    | 2.064 Å | Balasekaran, S. M.; Lawler, K.; Hagenbach, A.; Abram, A.; Abram, U; Sattelberger, A.; Poineau, F. <i>Eur. J. Inorg. Chem.</i> <b>2019</b> , 4129. (NH <sub>4</sub> ) <sub>4</sub> [Ni(H <sub>2</sub> O) <sub>6</sub> ][Re <sub>4</sub> F <sub>18</sub> ]·4H <sub>2</sub> O                |

|        |         |                                                                                                                                                                                                                                                                                                                                                                                                      |
|--------|---------|------------------------------------------------------------------------------------------------------------------------------------------------------------------------------------------------------------------------------------------------------------------------------------------------------------------------------------------------------------------------------------------------------|
| 26149  | 2.064 Å | Baggio, S.; Becka, L. N. <i>Acta Crystallogr., Sect. B</i> <b>1969</b> , <i>25</i> , 1150. [Ni(H <sub>2</sub> O) <sub>6</sub> ]SO <sub>3</sub>                                                                                                                                                                                                                                                       |
| CUPBAQ | 2.064 Å | Healy, P. C.; Patrick, J. M.; White, A. H. <i>Aust. J. Chem.</i> <b>1984</b> , <i>37</i> , 1105. (C <sub>2</sub> H <sub>10</sub> N <sub>2</sub> )[Ni(H <sub>2</sub> O) <sub>6</sub> ]·4H <sub>2</sub> O                                                                                                                                                                                              |
| HULMEG | 2.064 Å | Rodriguez-Martin, Y.; Sanchiz, J.; Ruiz-Perez, C.; Lloret, F.; Julve, M. <i>Cryst. Eng. Comm.</i> <b>2002</b> , <i>4</i> , 631. [Ni(H <sub>2</sub> O) <sub>6</sub> ][Cu(Br <sub>2</sub> (C <sub>3</sub> H <sub>4</sub> O <sub>5</sub> ) <sub>2</sub> )                                                                                                                                               |
| KICJUB | 2.064 Å | El-Essawi, M. M.; Masoud, M. S.; Amr, A. M.; Weller, F. <i>Spectrosc. Lett.</i> <b>1990</b> , <i>23</i> , 175. [Ni(H <sub>2</sub> O) <sub>6</sub> ](C <sub>13</sub> H <sub>10</sub> N <sub>3</sub> O <sub>4</sub> ) <sub>2</sub> ·6H <sub>2</sub> O                                                                                                                                                  |
| KUGLOW | 2.064 Å | Gonzalez Nieves, K.; Pinero Cruz, D. M. <i>Acta Crystallogr., Sect. E</i> <b>2020</b> , <i>76</i> , 314. [Ni(H <sub>2</sub> O) <sub>6</sub> ][Ni(C <sub>84</sub> H <sub>66</sub> N <sub>14</sub> O <sub>40</sub> S <sub>14</sub> )·18H <sub>2</sub> O                                                                                                                                                |
| PICKOC | 2.064 Å | Taguchi, M.; Igashira-Kamiyama, A.; Kajiwara, T.; Konno, T. <i>Angew Chem., Int. Ed.</i> <b>2007</b> , <i>46</i> , 2422. [Ni(H <sub>2</sub> O) <sub>6</sub> ][Au <sub>2</sub> Ni <sub>2</sub> C <sub>20</sub> H <sub>36</sub> N <sub>4</sub> O <sub>8</sub> S <sub>4</sub> ]·3.5H <sub>2</sub> O                                                                                                     |
| POGQAG | 2.064 Å | Mohan, M.; Rajak, S.; Tremblay, A. A.; Maris, T.; Duong, A. <i>Dalton Trans.</i> <b>2019</b> , <i>48</i> , 7006. [Ni(H <sub>2</sub> O) <sub>6</sub> ] <sub>0.98</sub> [Mn(H <sub>2</sub> O) <sub>6</sub> ] <sub>0.02</sub> [NiC <sub>12</sub> H <sub>10</sub> N <sub>14</sub> O <sub>10</sub> ] <sub>0.69</sub> [MnC <sub>12</sub> H <sub>10</sub> N <sub>14</sub> O <sub>10</sub> ] <sub>0.31</sub> |
| YOSDAM | 2.064 Å | Qiu, L.-G.; Gu, L.-N.; Hu, G.; Zhang, L.-D. <i>J. Solid State Chem.</i> <b>2009</b> , <i>182</i> , 502. [Ni(H <sub>2</sub> O) <sub>6</sub> ][Zn(H <sub>2</sub> O) <sub>2</sub> (C <sub>12</sub> H <sub>8</sub> N <sub>2</sub> ) <sub>2</sub> ](1,3,5-(OOC) <sub>3</sub> C <sub>6</sub> H <sub>3</sub> ) <sub>2</sub> ·22H <sub>2</sub> O                                                             |
| BEVSON | 2.065 Å | Liu, J. <i>Dyes Pigm.</i> <b>2018</b> , <i>154</i> , 92. [Ni(H <sub>2</sub> O) <sub>6</sub> ](C <sub>12</sub> H <sub>14</sub> N <sub>2</sub> )(1,4-(OOC) <sub>2</sub> C <sub>6</sub> H <sub>4</sub> ) <sub>2</sub> ·4H <sub>2</sub> O                                                                                                                                                                |
| GIDFEG | 2.065 Å | Ronson, T. K.; Giri, C.; Beyeh, N. K.; Minkkinen, A.; Topic, F.; Holstein, J. J.; Rissanen, K.; Nitschke, J. <i>R. Chem. Eur. J.</i> <b>2013</b> , <i>19</i> , 3374. [Ni(H <sub>2</sub> O) <sub>6</sub> ] <sub>2</sub> [Ni <sub>4</sub> C <sub>144</sub> H <sub>96</sub> N <sub>24</sub> O <sub>36</sub> S <sub>12</sub> ]·C <sub>7</sub> H <sub>14</sub> ·67.68H <sub>2</sub> O                     |
| UBEPAU | 2.065 Å | Chen, K.; Liang, L.-L.; Zhang, Y.-Q.; Zhu, Q.-J.; Xue, S.-F.; Tao, Z. <i>Inorg. Chem.</i> <b>2011</b> , <i>50</i> , 7754. (H <sub>3</sub> O) <sub>2</sub> [Ni(H <sub>2</sub> O) <sub>6</sub> ][SmC <sub>30</sub> H <sub>36</sub> ClN <sub>20</sub> O <sub>13</sub> ] <sub>2</sub> Cl <sub>6</sub> (NO <sub>3</sub> ) <sub>2</sub> ·16H <sub>2</sub> O                                                |
| CAWMOF | 2.066 Å | Yuan, N.; Tian, C.; Sheng, T.; Hu, S.; Wu, X. <i>Inorg. Chem. Commun.</i> <b>2017</b> , <i>81</i> , 33. [Ni(H <sub>2</sub> O) <sub>6</sub> ][NiC <sub>84</sub> H <sub>66</sub> N <sub>14</sub> O <sub>40</sub> S <sub>14</sub> ]·18H <sub>2</sub> O                                                                                                                                                  |
| COZJIK | 2.066 Å | Soldanova, J.; Pavelcik, F.; Majer, J.; Garaj, J. <i>Chem. Zvesti</i> <b>1984</b> , <i>38</i> , 321. K <sub>2</sub> [Ni(H <sub>2</sub> O) <sub>6</sub> ][Ni(C <sub>5</sub> H <sub>6</sub> NO <sub>4</sub> ) <sub>2</sub> ]·4H <sub>2</sub> O                                                                                                                                                         |
| LERMIF | 2.066 Å | Rekik, W.; Naili, H.; Bataille, T.; Mhiri, T. <i>J. Organometal. Chem.</i> <b>2006</b> , <i>691</i> , 4725. [Ni(H <sub>2</sub> O) <sub>6</sub> ](C <sub>6</sub> H <sub>14</sub> N <sub>2</sub> )(SO <sub>4</sub> ) <sub>2</sub>                                                                                                                                                                      |
| MAJQEW | 2.066 Å | Liang, Z.-Y.; Chen, H.-Y.; Shan, C.-Y.; Zhang, Y.-Q.; Tao, Z. <i>Polyhedron</i> <b>2016</b> , <i>110</i> , 125. [Ni(H <sub>2</sub> O) <sub>6</sub> ][EuC <sub>30</sub> H <sub>36</sub> ClN <sub>20</sub> O <sub>13</sub> ] <sub>2</sub> Cl <sub>6</sub> ·26H <sub>2</sub> O                                                                                                                          |
| WURBUH | 2.066 Å | Eshtiagh-Hosseini, H.; Aghabozorg, H.; Mirzaei, M.; Amini, M. M.; Chen, Y.-G.; Shokrollahi, A.; Aghaei, R. <i>J. Mo. Struct.</i> <b>2010</b> , <i>973</i> , 180. [Ni(H <sub>2</sub> O) <sub>6</sub> ](C <sub>6</sub> H <sub>9</sub> N <sub>2</sub> ) <sub>2</sub> [Ni(C <sub>7</sub> H <sub>3</sub> NO <sub>4</sub> ) <sub>2</sub> ]·2H <sub>2</sub> O                                               |
| 16602  | 2.067 Å | Montgomery, H. <i>Acta Crystallogr.</i> <b>1964</b> , <i>17</i> , 1478. (NH <sub>4</sub> ) <sub>2</sub> [Ni(H <sub>2</sub> O) <sub>6</sub> ](SO <sub>4</sub> ) <sub>2</sub>                                                                                                                                                                                                                          |
| 43310  | 2.067 Å | Montgomery, H.; Lingafelter, E. C. <i>Acta Crystallogr.</i> <b>1964</b> , <i>17</i> , 1478. (NH <sub>4</sub> ) <sub>2</sub> [Ni(H <sub>2</sub> O) <sub>6</sub> ](SO <sub>4</sub> ) <sub>2</sub>                                                                                                                                                                                                      |
| 414634 | 2.067 Å | Haag, J. M.; LeBret, G. C.; Cleary, D. A.; Twamley, B. <b>2005</b> , <i>178</i> , 1308. [Ni(H <sub>2</sub> O) <sub>6</sub> ]P <sub>2</sub> O <sub>6</sub>                                                                                                                                                                                                                                            |



|          |         |                                                                                                                                                                                                                                                                                                                                                                                              |
|----------|---------|----------------------------------------------------------------------------------------------------------------------------------------------------------------------------------------------------------------------------------------------------------------------------------------------------------------------------------------------------------------------------------------------|
| UJEDOD   | 2.067 Å | Wang, H.-S.; Zhang, W.-Q.; Zhang, F.-J.; Zi, J.-F. <i>Huaxue Yanjiu</i> <b>2009</b> , <i>20</i> , 43-3.<br>[Ni(H <sub>2</sub> O) <sub>6</sub> ][Ni(H <sub>2</sub> O) <sub>3</sub> ((C <sub>12</sub> H <sub>10</sub> NO <sub>8</sub> )]·6H <sub>2</sub> O                                                                                                                                     |
| TUGCIK   | 2.068 Å | Liu, J.; Lu, Y.; Lu, W. <i>Dalton Trans.</i> <b>2020</b> , <i>49</i> , 4044. [Ni(H <sub>2</sub> O) <sub>6</sub> ] <sub>2</sub> [NiC <sub>10</sub> H <sub>10</sub> O <sub>12</sub> ](C <sub>26</sub> H <sub>20</sub> N <sub>2</sub> O <sub>4</sub> )·4H <sub>2</sub> O                                                                                                                        |
| YUJCIS   | 2.086 Å | Chen, X.-L.; Shen, Y.-J.; Gao, C.; Yang, J.; Sun, X.; Zhang, X.; Yang, Y.-D.; Wei, G.-P.; Xiang, J.-F.; Sessler, J. L.; Gong, H.-Y. <i>J. Am. Chem. Soc.</i> <b>2020</b> , <i>142</i> , 7443. [Ni(H <sub>2</sub> O) <sub>6</sub> ] <sub>2</sub> (C <sub>38</sub> H <sub>34</sub> N <sub>10</sub> )(1,4-(COO) <sub>2</sub> -C <sub>6</sub> H <sub>4</sub> ) <sub>4</sub> ·28H <sub>2</sub> O  |
| CEJMEJ01 | 2.069 Å | Wu, W.; Xie, J.-M.; Xuan, Y.-W. <i>Z. Anorg. Allg. Chem.</i> <b>2009</b> , <i>635</i> , 635. K <sub>2</sub> [Ni(H <sub>2</sub> O) <sub>6</sub> ](C <sub>8</sub> H <sub>5</sub> O <sub>4</sub> ) <sub>4</sub> ·4H <sub>2</sub> O                                                                                                                                                              |
| TAKTOP   | 2.069 Å | Koval'chukova, O. V.; Kuz'mina, N. E.; Palkina, K. K.; Strashnova, S. B.; Zaitsev, B. E.; Ryabov, M. A. <i>Zh. Neorg. Khim.</i> <b>2003</b> , <i>48</i> , 244. [Ni(H <sub>2</sub> O) <sub>6</sub> ](C <sub>5</sub> H <sub>7</sub> N <sub>2</sub> O <sub>6</sub> ) <sub>2</sub> ·2H <sub>2</sub> O                                                                                            |
| GIDFIK   | 2.070 Å | Ronson, T. K.; Giri, C.; Beyeh, N. K.; Minkkinen, A.; Topic, F.; Holstein, J. J.; Rissanen, K.; Nitschke, J. <i>R. Chem. Eur. J.</i> <b>2013</b> , <i>19</i> , 3374. [Ni(H <sub>2</sub> O) <sub>6</sub> ] <sub>2</sub> [Ni <sub>4</sub> C <sub>144</sub> H <sub>96</sub> N <sub>24</sub> O <sub>36</sub> S <sub>12</sub> ]·0.76CCl <sub>4</sub> ·0.24CBr <sub>4</sub> ·61.82H <sub>2</sub> O |
| MAJQIA   | 2.070 Å | Liang, Z.-Y.; Chen, H.-Y.; Shan, C.-Y.; Zhang, Y.-Q.; Tao, Z. <i>Polyhedron</i> <b>2016</b> , <i>110</i> , 125.<br>[Ni(H <sub>2</sub> O) <sub>6</sub> ][GdC <sub>30</sub> H <sub>36</sub> ClN <sub>20</sub> O <sub>13</sub> ] <sub>2</sub> Cl <sub>6</sub> ·24H <sub>2</sub> O                                                                                                               |
| IYOHIQ   | 2.071 Å | Surinwong, A.; Kuwamura, N.; Kojima, T.; Yoshinari, N.; Rujiwatra, A.; Konno, T. <i>Inorg. Chem.</i> <b>2021</b> , <i>60</i> , 12555. [Ni(H <sub>2</sub> O) <sub>6</sub> ] <sub>2</sub> [Ni(H <sub>2</sub> O) <sub>4</sub> ][Au <sub>3</sub> Co <sub>2</sub> C <sub>30</sub> H <sub>54</sub> N <sub>6</sub> O <sub>12</sub> S <sub>6</sub> ] <sub>2</sub>                                    |
| LIKDIT   | 2.072 Å | Li, L.-Z.; Wang, L.-H. <i>Z. Kristallogr.- New Cryst. Struct.</i> <b>2007</b> , <i>222</i> , 119.<br>[Ni(H <sub>2</sub> O) <sub>6</sub> ] <sub>2</sub> [Ni(C <sub>9</sub> H <sub>7</sub> NO <sub>3</sub> ) <sub>2</sub> ]·2H <sub>2</sub> O                                                                                                                                                  |
| 280901   | 2.073 Å | Higami, T.; Hashimoto, M.; Okeya, S. <i>Acta Crystallogr., Sect. C</i> <b>2002</b> , <i>58</i> , 144.<br>[Ni(H <sub>2</sub> O) <sub>6</sub> ] <sub>2</sub> [Na(H <sub>2</sub> O) <sub>3</sub> ] <sub>2</sub> [V <sub>10</sub> O <sub>28</sub> ]·4H <sub>2</sub> O                                                                                                                            |
| 411793   | 2.073 Å | Mialane, P.; Marrot, J.; Mallard, A.; Herve, G. <i>Inorg. Chim. Acta</i> <b>2002</b> , <i>328</i> , 81.<br>K <sub>8</sub> [Ni(H <sub>2</sub> O) <sub>6</sub> ] <sub>1.5</sub> [W <sub>19</sub> As <sub>2</sub> (H <sub>2</sub> O)(K(H <sub>2</sub> O)))Ni(H <sub>2</sub> O) <sub>4</sub> O <sub>67</sub> ]·21H <sub>2</sub> O                                                                |
| NELMUO   | 2.073 Å | Belosevic, S.; Cendic, M.; Meetsma, A.; Matovic, Z. D. <i>Polyhedron</i> <b>2013</b> , <i>50</i> , 473.<br>[Ni(H <sub>2</sub> O) <sub>6</sub> ][Ni(H <sub>2</sub> O)(C <sub>8</sub> H <sub>11</sub> N <sub>2</sub> O <sub>7</sub> )] <sub>2</sub> ·2H <sub>2</sub> O                                                                                                                         |
| 433307   | 2.075 Å | Kleeberg, F. M.; Dinnebier, R. E.; Schleid, T. <i>Inorg. Chim. Acta</i> <b>2017</b> , <i>147</i> . [Ni(H <sub>2</sub> O) <sub>6</sub> ]B <sub>12</sub> Cl <sub>12</sub>                                                                                                                                                                                                                      |
| COHFAG   | 2.075 Å | Oliva, G.; Castellano, E. E.; Zukerman-Schpector, J.; Massabni, A. C. <i>Inorg. Chim. Acta</i> <b>1984</b> , <i>89</i> , 9.<br>K <sub>2</sub> [Ni(H <sub>2</sub> O) <sub>6</sub> ](C <sub>6</sub> H <sub>5</sub> ) <sub>3</sub> AsO <sub>4</sub> ·4H <sub>2</sub> O                                                                                                                          |
| MAJQUM   | 2.075 Å | Liang, Z.-Y.; Chen, H.-Y.; Shan, C.-Y.; Zhang, Y.-Q.; Tao, Z. <i>Polyhedron</i> <b>2016</b> , <i>110</i> , 125.<br>[Ni(H <sub>2</sub> O) <sub>6</sub> ][PrNaC <sub>30</sub> H <sub>36</sub> ClN <sub>20</sub> O <sub>13</sub> ] <sub>2</sub> Cl <sub>8</sub> ·18H <sub>2</sub> O                                                                                                             |
| DEZPEF01 | 2.077 Å | Meier, R.; Platas-Iglesias, C.; Heinemann, F. W.; Linti, G.; Schulte, J.; Srivastava, S. K. <i>Inorg. Chem.</i> <b>2014</b> , <i>53</i> , 6684. [Ni(H <sub>2</sub> O) <sub>6</sub> ][NiC <sub>11</sub> H <sub>14</sub> N <sub>2</sub> O <sub>8</sub> ]·2H <sub>2</sub> O                                                                                                                     |
| IKEMIW   | 2.077 Å | Zhu, X.; Liao, W. <i>Polyhedron</i> <b>2016</b> , <i>111</i> , 185. [Ni(H <sub>2</sub> O) <sub>6</sub> ][Ni(C <sub>12</sub> H <sub>12</sub> N <sub>2</sub> ) <sub>3</sub> ] <sub>2</sub> [Ni <sub>2</sub> Nd <sub>2</sub> C <sub>96</sub> H <sub>60</sub> O <sub>54</sub> S <sub>16</sub> ]·8H <sub>2</sub> O                                                                                |
| 411794   | 2.078 Å | Mialane, P.; Marrot, J.; Mallard, A.; Herve, G. <i>Inorg. Chim. Acta</i> <b>2002</b> , <i>328</i> , 81.<br>Cs <sub>5.84</sub> K <sub>2.16</sub> [Ni(H <sub>2</sub> O) <sub>6</sub> ][As <sub>2</sub> W <sub>19</sub> (H <sub>2</sub> O)Ni(H <sub>2</sub> O) <sub>2</sub> O <sub>67</sub> ]·17H <sub>2</sub> O                                                                                |

|          |         |                                                                                                                                                                                                                                                                                                                                                                                              |
|----------|---------|----------------------------------------------------------------------------------------------------------------------------------------------------------------------------------------------------------------------------------------------------------------------------------------------------------------------------------------------------------------------------------------------|
| JEYTOX   | 2.080 Å | Xie, C.; Chang, D.-W.; Mu, S.-C.; Zhou, L.-N.; Chen, W. <i>Acta Crystallogr., Sect. E</i> <b>2007</b> , <i>63</i> , m662. [Ni(H <sub>2</sub> O) <sub>6</sub> ](NO <sub>3</sub> ) <sub>2</sub> (C <sub>9</sub> H <sub>8</sub> N <sub>4</sub> S <sub>2</sub> ) <sub>2</sub>                                                                                                                    |
| 27807    | 2.081 Å | Grandjean, D.; Weiss, R.; Kern, R. <i>Comptes Rendus Hebdomadaires des Seances de l'Academie des Sciences</i> <b>1962</b> , <i>255</i> , 964. [Ni(H <sub>2</sub> O) <sub>6</sub> ]SO <sub>3</sub>                                                                                                                                                                                            |
| 263943   | 2.081 Å | Sadikin, Y.; Didelot, E.; Lodziana, Z.; Cerny, R. <i>Dalton Trans.</i> <b>2018</b> , <i>47</i> , 5843. [Ni(H <sub>2</sub> O) <sub>6</sub> ]B <sub>12</sub> H <sub>12</sub>                                                                                                                                                                                                                   |
| QEPIO    | 2.081 Å | Malik, A. U Zhou, X.-L.; Kong, S.-N.; Li, L.-L.; Bao, X.-L.; Shu, M.-H. <i>Dalton Trans.</i> <b>2018</b> , <i>47</i> , 1764. [Ni(H <sub>2</sub> O) <sub>6</sub> ](ClO <sub>4</sub> ) <sub>2</sub> ·2[Ni <sub>6</sub> C <sub>84</sub> H <sub>84</sub> N <sub>6</sub> O <sub>36</sub> S <sub>12</sub> ]                                                                                        |
| IKEMOC   | 2.082 Å | Zhu, X.; Liao, W. <i>Polyhedron</i> <b>2016</b> , <i>111</i> , 185. [Ni(H <sub>2</sub> O) <sub>6</sub> ][Ni(C <sub>12</sub> H <sub>12</sub> N <sub>2</sub> ) <sub>3</sub> ] <sub>2</sub> [Ni <sub>2</sub> Er <sub>2</sub> C <sub>96</sub> H <sub>60</sub> O <sub>54</sub> S <sub>16</sub> ] <sub>2</sub> ·8H <sub>2</sub> O                                                                  |
| EQEHEO   | 2.086 Å | Li-Hui Zhang, Ying-Ying Liu, Jian-Fang Ma, Jin Yang, Li-Guang Zhang, Jun Li, Yan-Wei Li, Y.-W. <i>Polyhedron</i> <b>2011</b> , <i>30</i> , 764. [Ni(H <sub>2</sub> O) <sub>6</sub> ](C <sub>22</sub> H <sub>18</sub> N <sub>2</sub> O <sub>4</sub> )                                                                                                                                         |
| IYOHEM   | 2.086 Å | Surinwong, A. ; Kuwamura, N. ; Kojima, T. ; Yoshinari, N. ; Rujiwatra, A. ; Konno, T. <i>Inorg. Chem.</i> <b>2021</b> , <i>60</i> , 12555. [Ni(H <sub>2</sub> O) <sub>6</sub> ] <sub>3</sub> [Au <sub>3</sub> Co <sub>2</sub> C <sub>30</sub> H <sub>60</sub> N <sub>6</sub> O <sub>12</sub> S <sub>6</sub> ] <sub>2</sub>                                                                   |
| YUJCIS   | 2.086 Å | Xu-Lang Chen, Yun-Jia Shen, Chao Gao, Jian Yang, Xin Sun, Xin Zhang, Yu-Dong Yang, Gong-Ping Wei, Jun-Feng Xiang, J.L.Sessler, Han-Yuan Gong, H.-Y. <i>J. Am. Chem. Soc.</i> <b>2020</b> , <i>142</i> , 7443. [Ni(H <sub>2</sub> O) <sub>6</sub> ](C <sub>38</sub> H <sub>34</sub> N <sub>10</sub> )(1,4-(OOC) <sub>2</sub> C <sub>6</sub> H <sub>4</sub> ) <sub>4</sub> ·28H <sub>2</sub> O |
| XEMLOS   | 2.087 Å | Miminoshvili, E. B.; Miminoshvili, K. E.; Sakvarelidze, T. N. <i>Zh. Strukt. Khim.</i> <b>2012</b> , <i>53</i> , 191. [Ni(H <sub>2</sub> O) <sub>6</sub> ](C <sub>5</sub> H <sub>12</sub> N) <sub>2</sub> (3,5-(NO <sub>2</sub> ) <sub>2</sub> -C <sub>6</sub> H <sub>3</sub> -COO) <sub>4</sub> ·2H <sub>2</sub> O                                                                          |
| SIDJUL   | 2.089 Å | Sun, R.; Li, Y.-Z.; Bai, J.; Pan, Y. <i>Cryst. Growth Des.</i> <b>2007</b> , <i>7</i> , 890. [Ni(H <sub>2</sub> O) <sub>6</sub> ][Ni <sub>2</sub> C <sub>30</sub> H <sub>36</sub> N <sub>6</sub> O <sub>24</sub> ] <sub>3</sub> ·3H <sub>2</sub> O                                                                                                                                           |
| MAJRIB   | 2.090 Å | Liang, Z.-Y.; Chen, H.-Y.; Shan, C.-Y.; Zhang, Y.-Q.; Tao, Z. <i>Polyhedron</i> <b>2016</b> , <i>110</i> , 125. [Ni(H <sub>2</sub> O) <sub>6</sub> ][GdKC <sub>30</sub> H <sub>36</sub> Cl <sub>2</sub> N <sub>20</sub> O <sub>13</sub> ] <sub>2</sub> Cl <sub>6</sub> ·13H <sub>2</sub> O                                                                                                   |
| ZOZFUS   | 2.093 Å | Liu, Y.; Zhang, Z.; Li, X.-Y.; Yang, G.-Y. <i>Inorg. Chem. Commun.</i> <b>2020</b> , <i>113</i> , 107765. K <sub>4</sub> [Ni(H <sub>2</sub> O) <sub>6</sub> ][Ni <sub>8</sub> C <sub>48</sub> H <sub>24</sub> N <sub>36</sub> O <sub>48</sub> ] <sub>2</sub> ·20H <sub>2</sub> O                                                                                                             |
| 413186   | 2.095 Å | Zhang, Q.-Z.; Lu, C.-Z.; Yang, W.-B.; Wu, C.-D.; Yu, Y.-Q.; Yan, Y.; Liu, J.-H.; He, X. <i>J. Cluster Sci.</i> <b>2003</b> , <i>14</i> , 381. [Ni(H <sub>2</sub> O) <sub>6</sub> ] <sub>3</sub> [H <sub>3</sub> Mo <sub>12</sub> O <sub>40</sub> P] <sub>3</sub> ·30H <sub>2</sub> O                                                                                                         |
| ZASZOK   | 2.095 Å | Wang, Y.-T.; Tang, G.-M.; Wan, W.-Z.; Wu, Y.; Tian, T.-C.; Wang, J.-H.; He, C.; Long, X.-F.; Wang, J.-J.; Ng, S. W. <i>CrystEngComm</i> <b>2012</b> , <i>14</i> , 3802. [Ni(H <sub>2</sub> O) <sub>6</sub> ](C <sub>14</sub> H <sub>13</sub> O <sub>2</sub> ) <sub>2</sub> ·2H <sub>2</sub> O                                                                                                |
| 84309    | 2.097 Å | Lorenzo-Luis, P. A.; Martin-Zarza, P.; Gili, P.; Saez-Puche, R.; Jimenez-Jimenez, J.; Rodriguez-Castellon, E.; Ruiz-Perez, C.; Gonzalez-Platas, J.; Solans, X. <i>Eur. J. Solid State Inorg. Chem.</i> <b>1997</b> , <i>34</i> , 1259. [Ni(H <sub>2</sub> O) <sub>6</sub> ] <sub>3</sub> [TeMo <sub>6</sub> O <sub>24</sub> ]                                                                |
| NIEDTA10 | 2.101 Å | Porai-Koshits, M. A.; Nesterova, Ya. M.; Polynova, T. N.; de Garcia Banus, D. T. <i>Koord. Khim.</i> <b>1975</b> , <i>1</i> , 682. [Ni(H <sub>2</sub> O) <sub>6</sub> ] <sub>2</sub> [NiC <sub>10</sub> H <sub>15</sub> N <sub>2</sub> O <sub>9</sub> ] <sub>2</sub> ·2H <sub>2</sub> O                                                                                                      |
| 24140    | 2.102 Å | Weiss, R.; Grandjean, D.; Wendling, J. P. <i>Bull. Soc. Chim. Fr.</i> <b>1964</b> , 3152. [Ni(H <sub>2</sub> O) <sub>6</sub> ]SO <sub>3</sub>                                                                                                                                                                                                                                                |

|             |                               |                                                                                                                                                                                                                                                                                                                                                                                             |
|-------------|-------------------------------|---------------------------------------------------------------------------------------------------------------------------------------------------------------------------------------------------------------------------------------------------------------------------------------------------------------------------------------------------------------------------------------------|
| OPARUT      | 2.103 Å                       | Chen, L.; Zhao, J.; Ma, P.; Han, Q.; Wang, J.; Niu, J. <i>Inorg. Chem. Commun.</i> <b>2010</b> , <i>13</i> , 50.<br>[Ni(H <sub>2</sub> O) <sub>6</sub> ] <sub>2</sub> [Ni(H <sub>2</sub> O) <sub>5</sub> ][Ni <sub>18</sub> As <sub>4</sub> Na <sub>2</sub> W <sub>34</sub> C <sub>18</sub> H <sub>92</sub> N <sub>12</sub> O <sub>150</sub> ] <sub>2</sub> ·9H <sub>2</sub> O              |
| CETHIT      | 2.106 Å                       | Liu, X.-M.; Wang, C.-R.; Liu, B.; Xue, G.-L.; Hu, H.-M.; Wang, J.-W.; Fu, F. <i>Chin. J. Chem.</i> <b>2005</b> , <i>23</i> , 1412. Na <sub>10</sub> [Ni(H <sub>2</sub> O) <sub>6</sub> ][Ni <sub>3</sub> As <sub>2</sub> W <sub>18</sub> C <sub>15</sub> H <sub>15</sub> N <sub>3</sub> O <sub>66</sub> ] <sub>2</sub> ·34H <sub>2</sub> O                                                  |
| LATNEC      | 2.107 Å                       | Sohmiya, A.; Okuyama, T.; Suzuki, R.; Yamanishi, K.; Sugimoto, K.; Kondo, M. <i>Chem. Lett.</i> <b>2017</b> , <i>46</i> , 485. [Ni(H <sub>2</sub> O) <sub>6</sub> ][Ni(H <sub>2</sub> O) <sub>2</sub> (C <sub>23</sub> H <sub>14</sub> Cl <sub>2</sub> O <sub>6</sub> ) <sub>2</sub> ] <sub>2</sub> ·9H <sub>2</sub> O                                                                      |
| ZOZFUS      | 2.107 Å                       | Liu, Y.; Zhang, Z.; Li, X.-Y.; Yang, G.-Y. <i>Inorg. Chem. Commun.</i> <b>2020</b> , <i>113</i> , 107765.<br>[Ni(H <sub>2</sub> O) <sub>6</sub> ][Ni <sub>12</sub> W <sub>18</sub> C <sub>20</sub> H <sub>60</sub> O <sub>92</sub> P <sub>2</sub> ] <sub>2</sub> ·2H <sub>2</sub> O                                                                                                         |
| YAGCIT      | 2.117 Å                       | Qu, Y.; Liu, Z.-D.; Zhu, H.-L.; Tan, M.-Y. <i>Acta Crystallogr., Sect. E</i> <b>2004</b> , <i>60</i> , m1306. [Ni(H <sub>2</sub> O) <sub>6</sub> ](4-NO <sub>2</sub> -C <sub>6</sub> H <sub>4</sub> COO) <sub>2</sub> ·2H <sub>2</sub> O                                                                                                                                                    |
| IXOROD      | 2.124 Å                       | Jia, Z.-F.; Yang, J.; Liu, Y.-Y.; Ma, J.-F. <i>J. Coord. Chem.</i> <b>2011</b> , <i>64</i> , 2899.<br>[Ni(H <sub>2</sub> O) <sub>6</sub> ](C <sub>30</sub> H <sub>26</sub> N <sub>2</sub> O <sub>6</sub> )·0.5C <sub>2</sub> H <sub>5</sub> OH·9H <sub>2</sub> O                                                                                                                            |
| ROSSOJ      | 2.127 Å                       | Zhu, Z.; Bai, Y.-L.; Zhang, L.; Sun, D.; Fang, J.; Zhu, S. <i>Chem. Commun.</i> <b>2014</b> , <i>50</i> , 14674.<br>((CH <sub>3</sub> ) <sub>2</sub> NH <sub>2</sub> ) <sub>6</sub> [Ni(H <sub>2</sub> O) <sub>6</sub> ] <sub>3</sub> [Ni <sub>3</sub> C <sub>53</sub> H <sub>36</sub> N <sub>12</sub> O <sub>30</sub> ] <sub>2</sub> ·11H <sub>2</sub> O                                   |
| VEHWIQ      | 2.131 Å                       | Zheng, Y.-Y.; Wen, R.; Kong, X.-J.; Long, L.-S.; Huang, R.-B.; Zheng, L.-S. <i>Dalton Trans.</i> <b>2012</b> , <i>41</i> , 9871. [Ni(H <sub>2</sub> O) <sub>6</sub> ][Ni <sub>11</sub> W <sub>18</sub> C <sub>20</sub> H <sub>57</sub> N <sub>11</sub> O <sub>87</sub> P <sub>2</sub> ] <sub>2</sub> ·2(H <sub>2</sub> N(CH <sub>2</sub> ) <sub>2</sub> NH <sub>2</sub> )·6H <sub>2</sub> O |
| QIWHAF      | 2.132 Å                       | Berkessel, A.; Hermann, G.; Rauch, O.-T.; Buchner, M.; Jacobi, A.; Huttner, G. <i>Chem. Ber.</i> <b>1996</b> , <i>129</i> , 1421. [Ni(H <sub>2</sub> O) <sub>6</sub> ][NiC <sub>8</sub> H <sub>9</sub> N <sub>4</sub> O <sub>4</sub> S <sub>2</sub> ] <sub>2</sub> ·2CH <sub>3</sub> OH·C <sub>2</sub> H <sub>5</sub> OH·2H <sub>2</sub> O                                                  |
| POCDOD      | 2.153 Å                       | An, S.-W.; Mei, L.; Hu, K.-Q.; Li, F.-Z.; Xia, C.-Q.; Chai, Z.-F.; Shi, W.-Q. <i>Inorg. Chem.</i> <b>2019</b> , <i>58</i> , 6934. [Ni(H <sub>2</sub> O) <sub>6</sub> ](C <sub>10</sub> H <sub>9</sub> N <sub>2</sub> ) <sub>2</sub> [UC <sub>42</sub> H <sub>24</sub> O <sub>28</sub> S <sub>3</sub> ] <sub>2</sub>                                                                         |
| 249617      | 2.159 Å                       | Xiaobing, C.; Kechang, L.; Ling, Y.; Yan, C.; Jiqing, X.; Weijie, D.; Haihui, Y.; Zhihui, J.; Jiwen, C. <i>J. Solid State Chem.</i> <b>2008</b> , <i>181</i> , 221. [Ni(H <sub>2</sub> O) <sub>6</sub> ][H <sub>2</sub> As <sub>6</sub> V <sub>15</sub> O <sub>42</sub> (H <sub>2</sub> O)] <sub>2</sub> ·2H <sub>2</sub> O                                                                 |
| 245385      | 2.160 Å                       | Trobajo, C.; Salvado, M. A.; Pertierra, P.; Alfonso, B. F.; Blanco, J. A.; Khainakov, S. A.; Garcia, J. R. <i>Z. Anorg. Allg. Chem.</i> <b>2007</b> , <i>633</i> , 1932. K[Ni(H <sub>2</sub> O) <sub>6</sub> ]PO <sub>4</sub>                                                                                                                                                               |
| 28661       | 2.163 Å                       | Ferrari, A.; Colla, C. <i>Gazz. Chim. Ital.</i> <b>1937</b> , <i>67</i> , 294. [Ni(H <sub>2</sub> O) <sub>6</sub> ](H <sub>2</sub> PO <sub>3</sub> ) <sub>2</sub>                                                                                                                                                                                                                           |
| LATWIO      | 2.182 Å                       | Yu, K.; Zhou, B.; Yu, Y.; Su, Z.; Wang, C.; Wang, C.; Gao, S.; Chen, Y. <i>Inorg. Chim. Acta</i> <b>2012</b> , <i>8</i> , 384.<br>[Ni(H <sub>2</sub> O) <sub>6</sub> ](C <sub>3</sub> H <sub>5</sub> N <sub>2</sub> )(C <sub>5</sub> H <sub>6</sub> N)[Mo <sub>12</sub> Ni <sub>2</sub> Sr <sub>2</sub> H <sub>28</sub> O <sub>70</sub> O <sub>8</sub> ] <sub>2</sub> ·4H <sub>2</sub> O    |
| UCAWEB      | 2.191 Å                       | Shi, W.; Dai, Y.; Zhao, B.; Song, H.-B.; Wang, H.-G.; Cheng, P. <i>Inorg. Chem. Commun.</i> <b>2006</b> , <i>9</i> , 192.<br>[Ni(H <sub>2</sub> O) <sub>6</sub> ][Ni <sub>2</sub> (H <sub>2</sub> O) <sub>2</sub> C <sub>18</sub> H <sub>24</sub> N <sub>4</sub> O <sub>12</sub> ] <sub>2</sub> ·2H <sub>2</sub> O                                                                          |
| <b>Mean</b> | <b>2.055 Å/386 structures</b> |                                                                                                                                                                                                                                                                                                                                                                                             |

***Dimeric hydrates***

ICSD/CSD code  $d(\text{Ni-O})_b + d(\text{Ni-O})_t/d(\text{Ni}\cdots\text{Ni})$  Reference, compound formula

**$[\text{Ni}_2(\text{H}_2\text{O})_{10}]^{4+}$**

|             |                                                       |                                                                                                                                                                                                                                                                                                                                                                                                          |
|-------------|-------------------------------------------------------|----------------------------------------------------------------------------------------------------------------------------------------------------------------------------------------------------------------------------------------------------------------------------------------------------------------------------------------------------------------------------------------------------------|
| KISBEU      | 2.046 + 1.924 Å<br>2.694 Å                            | Zhao, J.-W.; Zheng, S.-T.; Yang, G.-Y. <i>J. Solid State Chem.</i> <b>2007</b> , <i>180</i> , 3317.<br>( $\text{H}_3\text{N}(\text{CH}_2)_2\text{NH}_3$ ) <sub>3</sub> [Ni <sub>2</sub> (H <sub>2</sub> O) <sub>10</sub> ][Ni <sub>4</sub> P <sub>2</sub> W <sub>18</sub> H <sub>4</sub> O <sub>70</sub> ]·H <sub>2</sub> N(CH <sub>2</sub> ) <sub>2</sub> NH <sub>2</sub> ·8H <sub>2</sub> O            |
| CAKSOY      | 2.075 + 1.926 Å<br>2.649 Å                            | Zhao, J.-W.; Chen, L.-J.; Ma, P.-T. <i>Henan Daxue Xuebao, Ziran Kexueban</i> <b>2009</b> , <i>39</i> , 602.<br>( $\text{H}_3\text{N}(\text{CH}_2)_2\text{NH}_3$ ) <sub>3</sub> [Ni <sub>2</sub> (H <sub>2</sub> O) <sub>10</sub> ][Ni <sub>4</sub> As <sub>2</sub> W <sub>18</sub> H <sub>4</sub> O <sub>70</sub> ]·2H <sub>2</sub> N(CH <sub>2</sub> ) <sub>2</sub> NH <sub>2</sub> ·8H <sub>2</sub> O |
| <b>Mean</b> | <b>1.925 + 2.061 Å/2 structures</b><br><b>2.672 Å</b> |                                                                                                                                                                                                                                                                                                                                                                                                          |

**Table S1aw.** Summary of solid state structures containing hydrated palladium(II) and platinum(II) ions. The ICSD/CDS code refers to the code in the Inorganic Crystal Structure Database (ICSD, number) and Cambridge Structure Database (CSD, letters), respectively, and the mean Pd/Pt-O bond distance,  $d(\text{Pd/Pt-O})$ . Data in purple text are not included in the mean distance as they are uncertain or differ significantly from the mean value.

### Palladium(II)

*Four-coordination, square-planar configuration*

| ICSD/CSD code | $d(\text{Pd-O})$            | Reference, compound formula, space group                                                                                                                                                                                                                                                                   |
|---------------|-----------------------------|------------------------------------------------------------------------------------------------------------------------------------------------------------------------------------------------------------------------------------------------------------------------------------------------------------|
| 432329        | 2.012 Å                     | Mazej, Z.; Goresnik, E. <i>Z. Kristallogr.-Cryst. Mater.</i> <b>2017</b> , 232, 339. $[\text{Pd}(\text{H}_2\text{O})_4](\text{SbF}_6) \cdot 4\text{H}_2\text{O}$                                                                                                                                           |
| 425166        | 2.029 Å                     | Sokolov, M. N.; Kalinina, I. V.; Peresypkina, E. V.; Moroz, N. K.; Naumov, D. Y.; Fedin, V. P. <i>Eur. J. Inorg. Chem.</i> <b>2013</b> , 1772. $\text{Na}_2\text{KH}[\text{Pd}(\text{H}_2\text{O})_4][\text{H}_2\text{W}_{12}\text{O}_{42}][\text{Pd}(\text{H}_2\text{O})_3]_2 \cdot 10\text{H}_2\text{O}$ |
| ZOXSOW        | 2.046 Å                     | Fortea-Perez, F. R.; Armentano, D.; Julve, M.; De Munno, G.; Stiriba, S.-E. <i>J. Coord. Chem.</i> <b>2014</b> , 67, 4003. $[\text{Pd}(\text{H}_2\text{O})_4][\text{Pd}(\text{C}_{10}\text{H}_9\text{NO}_3)_2] \cdot 2\text{H}_2\text{O}$                                                                  |
| KUZGET        | 2.080 Å                     | Fortea-Perez, F. R.; Neve, F.; Armentano, D.; De Munno, G.; Stiriba, S.-E.; Julve, M. <i>Inorg. Chim. Acta</i> <b>2016</b> , 443, 267. $[\text{Pd}(\text{H}_2\text{O})_4]((n\text{-C}_4\text{H}_9)_4\text{N})_4[\text{Pd}(\text{C}_8\text{H}_4\text{BrNO}_3)_2]_3 \cdot 2\text{H}_2\text{NCOCH}_3$         |
| KUYTOP        | 2.085 Å                     | Fortea-Perez, F. R.; Neve, F.; Armentano, D.; De Munno, G.; Stiriba, S.-E.; Julve, M. <i>Inorg. Chim. Acta</i> <b>2016</b> , 443, 267. $[\text{Pd}(\text{H}_2\text{O})_4]((n\text{-C}_4\text{H}_9)_4\text{N})_4[\text{Pd}(\text{C}_8\text{H}_4\text{ClNO}_3)_2]_3 \cdot 2\text{H}_2\text{NCOCH}_3$         |
| <b>Mean</b>   | <b>2.029 Å/3 structures</b> |                                                                                                                                                                                                                                                                                                            |

### Platinum(II)

*Four-coordination, square-planar configuration*

| ICSD/CSD code | $d(\text{P-O})$            | Reference, compound formula, space group                                                                                                                                                                                                                                                                                                                                                                                                                                   |
|---------------|----------------------------|----------------------------------------------------------------------------------------------------------------------------------------------------------------------------------------------------------------------------------------------------------------------------------------------------------------------------------------------------------------------------------------------------------------------------------------------------------------------------|
| 432329        | 2.012 Å                    | Seppelt, K. <i>Z. Anorg. Allg. Chem.</i> <b>2010</b> , 636, 2391. $[\text{Pt}(\text{H}_2\text{O})_4]\text{SbF}_6$                                                                                                                                                                                                                                                                                                                                                          |
| DIVYOZ        | 2.145 Å                    | Rivero-Crespo, M. A.; Mon, M.; Ferrando-Soria, J.; Lopes, C. W.; Boronat, M.; Leyva-Perez, A.; Corma, A.; Hernandez-Garrido, J. C.; Lopez-Haro, M.; Calvino, J. J.; Ramos-Fernandez, E. V.; Armentano, D.; Pardo, E. <i>Angew. Chem., Int. Ed.</i> <b>2018</b> , 57, 17094. $\text{Na}_6[\text{Pt}(\text{H}_2\text{O})_4]_2[\text{Pt}_2(\text{OH})_2\text{O}(\text{NH}_3)_4][\text{Cu}_3\text{Ni}_2\text{C}_{39}\text{H}_{38}\text{O}_{22}]_4 \cdot 134\text{H}_2\text{O}$ |
| <b>Mean</b>   | <b>2.012 Å/1 structure</b> |                                                                                                                                                                                                                                                                                                                                                                                                                                                                            |

**Table S1ax.** Summary of solid state structures containing hydrated copper(II) ions. The ICSD/CDS code refers to the code in the Inorganic Crystal Structure Database (ICSD, number) and Cambridge Structure Database (CSD, letters), respectively, and the mean Cu-O bond distance,  $d(\text{Cu-O})$ ;  $d(\text{Cu-O})_{\text{eq}}$  and  $d(\text{Cu-O})_{\text{ax}}$  denote bond distances in the equatorial plane and axial positions in a square pyramidal, bicapped trigonal pyramidal or Jahn-Teller distorted octahedral complexes where the axial Cu-O bond distances in some cases are split then denoted  $d(\text{Cu-O})_{\text{ax1}}$  and  $d(\text{Cu-O})_{\text{ax2}}$ . Data in purple text are not included in the mean distance as they are uncertain or differ significantly from the mean value.

## Copper(II)

### Four-coordination, square-planar configuration

| ICSD/CSD code | $d(\text{Cu-O})$            | Reference, compound formula, space group                                                                                                                                                                                                                                     |
|---------------|-----------------------------|------------------------------------------------------------------------------------------------------------------------------------------------------------------------------------------------------------------------------------------------------------------------------|
| GEDBIA        | 1.919 Å                     | Mak, C. W. T.; Kennard, C. H. L.; Smith, G.; O'Reilly, E. J.; Sagatys, D. S.; Fulwood, J. C. <i>Polyhedron</i> <b>1987</b> , <i>6</i> , 855-861. $[\text{Cu}(\text{H}_2\text{O})_4][\text{Cu}_2\text{C}_{50}\text{H}_{55}\text{O}_{15}]_2$                                   |
| PUKMIT        | 1.930 Å                     | Patra, A.; Haldar, S.; Kumar, G. V.; Carrella, L.; Ghosh, A. K.; Bera, M. <i>Inorg. Chim. Acta</i> <b>2015</b> , <i>436</i> , 195-204. $[\text{Cu}(\text{H}_2\text{O})_4][\text{Cu}_2\text{C}_{38}\text{H}_{34}\text{N}_4\text{O}_7]_2\text{Cl}_2 \cdot 5\text{H}_2\text{O}$ |
| CUHMAL        | 1.946 Å                     | Prout, C. K.; Carruthers, J. R.; Rossotti, F. J. C <i>J. Chem. Soc. A</i> <b>1971</b> , 3342-3349. $[\text{Cu}(\text{H}_2\text{O})_4](\text{C}_4\text{H}_3\text{O}_4)_2$                                                                                                     |
| 170205        | 2.019 Å                     | Chippindale, A. L.; Hibble, S. J.; Cowley, A. R. <i>Inorg. Chem.</i> <b>2004</b> , <i>43</i> , 8040-8048. $[\text{Cu}(\text{H}_2\text{O})_4][\text{Cu}_2(\text{CN})\text{I}_2]$                                                                                              |
| TIKPOV        | 2.031 Å                     | Li, S.; Feng, Z.; Hu, Y.; Wei, C.; Wu, H.; Huang, J. <i>Inorg. Chem.</i> <b>2018</b> , <i>57</i> , 13289. $[\text{Cu}(\text{H}_2\text{O})_4][\text{Cu}_2(\text{CN})_3]_2$                                                                                                    |
| <b>Mean</b>   | <b>1.932 Å/3 structures</b> |                                                                                                                                                                                                                                                                              |

### Five-coordination, trigonal bipyramidal configuration

| ICSD/CSD code | $d(\text{Cu-O})_{\text{eq}}+d(\text{Cu-O})_{\text{ax}}$ | Reference, compound formula                                                                                                                                                                     |
|---------------|---------------------------------------------------------|-------------------------------------------------------------------------------------------------------------------------------------------------------------------------------------------------|
| ECAJEY        | 1.936+2.011 Å                                           | Shivaiah, V.; Das, S. K. <i>Angew. Chem., Int. Ed.</i> <b>2006</b> , <i>45</i> , 245. $[\text{Cu}(\text{H}_2\text{O})_5][\text{Mo}_6\text{O}_{19}] \cdot 2\text{C}_{12}\text{H}_{24}\text{O}_6$ |

### Five-coordination, square pyramidal configuration

| ICSD/CSD code | $d(\text{Cu-O})_{\text{eq}}+d(\text{Cu-O})_{\text{ax}}$ | Reference, compound formula                                                                                                                                                                                                                                                                                   |
|---------------|---------------------------------------------------------|---------------------------------------------------------------------------------------------------------------------------------------------------------------------------------------------------------------------------------------------------------------------------------------------------------------|
| ANEKOW        | 1.880 + 2.356 Å                                         | Dutta, N.; Haldar, S.; Majumder, A.; Vijaykumar, G.; Carrella, L.; Bera, M. <i>Inorg. Chem. Commun.</i> <b>2020</b> , <i>121</i> , 108208. $[\text{Cu}(\text{H}_2\text{O})_5]\text{ClBr}[\text{Cu}_4\text{C}_{68}\text{H}_{66}\text{N}_8\text{O}_{14}] \cdot 2\text{CH}_3\text{OH} \cdot 8\text{H}_2\text{O}$ |

|             |                                     |                                                                                                                                                                                                                                                                                                  |
|-------------|-------------------------------------|--------------------------------------------------------------------------------------------------------------------------------------------------------------------------------------------------------------------------------------------------------------------------------------------------|
| XATMIQ      | 1.927 + 2.138 Å                     | Kaabi, K.; Zeller, M.; Ferretti, V.; Silva, P. S P.; Nasr, C. B. <i>Inorg. Chim. Acta</i> <b>2012</b> , 388, 52.<br>[Cu(H <sub>2</sub> O) <sub>5</sub> ][CuN <sub>4</sub> C <sub>20</sub> H <sub>28</sub> N <sub>8</sub> O <sub>4</sub> ](ClO <sub>4</sub> ) <sub>4</sub> ·6H <sub>2</sub> O     |
| MAWGIB      | 1.954 + 2.246 Å                     | Yue, C.; Lin, Z.; Chen, L.; Jiang, F.; Hong, M. <i>J. Mol. Struct.</i> <b>2005</b> , 779, 16.<br>[Cu(H <sub>2</sub> O) <sub>5</sub> ][CuC <sub>16</sub> H <sub>14</sub> Br <sub>2</sub> N <sub>2</sub> O <sub>10</sub> ]·CH <sub>3</sub> OH                                                      |
| EZIJAB      | 1.956 + 2.173 Å                     | Majumder, A.; Dutta, N.; Das, A.; Carrella, L.; Bera, M. <i>Polyhedron</i> <b>2021</b> , 208, 115417.<br>[Cu(H <sub>2</sub> O) <sub>5</sub> ]Br <sub>2</sub> ·2[Cu <sub>2</sub> AsC <sub>33</sub> H <sub>35</sub> N <sub>4</sub> O <sub>7</sub> ]·0.67CH <sub>3</sub> OH·13.83H <sub>2</sub> O   |
| UPODAH      | 1.974 + 2.178 Å                     | Ling, I.; Sobolev, A. N.; Raston, C. L. <i>J. Coord. Chem.</i> <b>2021</b> , 74, 40.<br>[Cu(H <sub>2</sub> O) <sub>5</sub> ][Cu <sub>3</sub> C <sub>56</sub> H <sub>64</sub> O <sub>44</sub> S <sub>8</sub> ](NO <sub>3</sub> ) <sub>2</sub> ·7H <sub>2</sub> O                                  |
| 281341      | 1.985 + 2.320 Å                     | Bramsen, F.; Bond, A. D.; McKenzie, C. J. <i>Acta Crystallogr., Sect. E</i> <b>2003</b> , 59, i105.<br>H <sub>3</sub> O[Cu(H <sub>2</sub> O) <sub>5</sub> ](ClO <sub>4</sub> ) <sub>3</sub>                                                                                                      |
| SOZYAH      | 2.316 Å (mean)                      | Guillou, O.; Bergerat, P.; Kahn, O.; Bakalbassis, E.; Boubekeur, K.; Batail, P.; Guillot, M. <i>Inorg. Chem.</i> <b>1992</b> , 31, 110. [Cu(H <sub>2</sub> O) <sub>5</sub> ][Cu <sub>3</sub> Gd <sub>2</sub> C <sub>23</sub> H <sub>28</sub> N <sub>6</sub> O <sub>27</sub> ]·15H <sub>2</sub> O |
| <b>Mean</b> | <b>1.959 + 2.211 Å/5 structures</b> |                                                                                                                                                                                                                                                                                                  |

*Six-coordination in Jahn-Teller distorted complexes without center of symmetry or with the center of symmetry not on copper in the [Cu(H<sub>2</sub>O)<sub>6</sub>]<sup>2+</sup> complex*

| ICSD/CSD code | $d(\text{Cu-O})_{\text{eq}}+d(\text{Cu-O})_{\text{ax1}}+d(\text{Cu-O})_{\text{ax2}}$ | Reference, compound formula, space group                                                                                                                                                                                                                                                                                            |
|---------------|--------------------------------------------------------------------------------------|-------------------------------------------------------------------------------------------------------------------------------------------------------------------------------------------------------------------------------------------------------------------------------------------------------------------------------------|
| PIVJIO        | 1.976 + 2.284 + 2.406 Å                                                              | Ma, Y.-S.; Wang, T.-W.; Li, Y.-Z.; Zheng, L.-M. <i>Inorg. Chim. Acta</i> <b>2007</b> , 360, 4117.<br>[Cu(H <sub>2</sub> O) <sub>6</sub> ][Cu <sub>2</sub> C <sub>10</sub> H <sub>8</sub> Cl <sub>2</sub> N <sub>2</sub> O <sub>8</sub> P <sub>2</sub> ]·2H <sub>2</sub> O; space group: Pc.                                         |
| WULSAY        | 1.979 + 2.375 + 2.383 Å                                                              | Zhang, W.; Chen, L.-Z.; Xiong, R.-G.; Nakamura, T.; Huang, S. D. <i>J. Am. Chem. Soc.</i> <b>2009</b> , 131, 12544. [Cu(H <sub>2</sub> O) <sub>6</sub> ](C <sub>6</sub> H <sub>14</sub> N <sub>2</sub> )(SeO <sub>4</sub> ) <sub>2</sub> ; space group: P2 <sub>1</sub> .                                                           |
| IBUHUJ        | 1.980 + 2.283 + 2.341 Å                                                              | Laborda, S.; Clerac, R.; Anson, C. E.; Powell, A. K. <i>Inorg. Chem.</i> <b>2004</b> , 43, 5931.<br>[Cu(H <sub>2</sub> O) <sub>6</sub> ][Cu <sub>2</sub> C <sub>17</sub> H <sub>21</sub> N <sub>2</sub> O <sub>11</sub> ]NO <sub>3</sub> ·2H <sub>2</sub> O; 2.283 + 2.341 Å, space group: P-1.                                     |
| YAYLUH        | 1.980 + 2.252 + 2.399 Å                                                              | Xiong, K.; Jiang, F.; Wu, M.; Gai, Y.; Chen, Q.; Zhang, S.; Ma, J.; Han, D.; Hong, M. <i>J. Solid State Chem.</i> <b>2012</b> , 192, 215. [Cu(H <sub>2</sub> O) <sub>6</sub> ] <sub>2</sub> [Cu <sub>4</sub> C <sub>68</sub> H <sub>48</sub> N <sub>4</sub> O <sub>42</sub> S <sub>16</sub> ]·20H <sub>2</sub> O; space group: P-1. |
| XENJAD        | 1.982 + 2.297 + 2.352 Å                                                              | Hajlaoui, F.; Naili, H.; Yahyaoui, S.; Mhiri, T.; Bataille, T. <i>J. Struct. Chem.</i> <b>2012</b> , 53, 334.<br>(C <sub>5</sub> H <sub>14</sub> N <sub>2</sub> )[Cu(H <sub>2</sub> O) <sub>6</sub> ](SO <sub>4</sub> ) <sub>2</sub> ; space group; P2 <sub>1</sub> ,                                                               |
| XENHUV        | 1.989 + 2.300 + 2.352 Å                                                              | Hajlaoui, F.; Naili, H.; Yahyaoui, S.; Mhiri, T.; Bataille, T. <i>J. Struct. Chem.</i> <b>2012</b> , 53, 334.<br>(C <sub>5</sub> H <sub>14</sub> N <sub>2</sub> )[Cu(H <sub>2</sub> O) <sub>6</sub> ](SO <sub>4</sub> ) <sub>2</sub> ; space group: P2 <sub>1</sub> .                                                               |
| ZADTEG        | 1.998 + 2.296 + 2.303 Å                                                              | An, H.; Wang, L.; Hu, Y.; Xu, T.; Hou, Y. <i>Inorg. Chem.</i> <b>2016</b> , 55, 144.<br>[Cu(H <sub>2</sub> O) <sub>6</sub> ][Co <sub>2</sub> Mo <sub>10</sub> H <sub>4</sub> O <sub>38</sub> ](4-C <sub>5</sub> H <sub>4</sub> CH <sub>2</sub> CH <sub>2</sub> COOH) <sub>4</sub> ·5H <sub>2</sub> O; space group: P1.              |

**Mean**            **1.983 + 2.298 + 2.362 Å/7 structures**    (**mean all Cu-O bond distances: 2.099 Å**)

*Six-coordination in Jahn-Teller distorted complexes with copper in center of symmetry of the [Cu(H<sub>2</sub>O)<sub>6</sub>]<sup>2+</sup> complex*

| ICSD/CSD code | $d(\text{Cu-O})_{\text{eq}}+d(\text{Cu-O})_{\text{ax}}$ | Reference, compound formula, space group                                                                                                                                                                                                                                                                                                                   |
|---------------|---------------------------------------------------------|------------------------------------------------------------------------------------------------------------------------------------------------------------------------------------------------------------------------------------------------------------------------------------------------------------------------------------------------------------|
| 412820        | 1.934 + 2.453 Å                                         | Hennig, C.; Reck, G.; Reich, T.; Rossberg, A.; Kraus, W.; Sieler, J., <i>Z. Kristallogr.</i> <b>2003</b> , 218, 37.<br>[Cu(H <sub>2</sub> O) <sub>6</sub> ][UO <sub>2</sub> AsO <sub>4</sub> ] <sub>2</sub> ·6H <sub>2</sub> O; space group: I4/mmm.                                                                                                       |
| 418106        | 1.935 + 2.380 Å                                         | Zhang, C.; Chen, Y.; Shi, D.; Pang, H.-J. <i>Z. Naturforsch., Teil B</i> <b>2008</b> , 63, 187.<br>[Cu(H <sub>2</sub> O) <sub>6</sub> ][Cu(H <sub>2</sub> O) <sub>2</sub> ] <sub>2</sub> [Cu(H <sub>2</sub> O) <sub>4</sub> H <sub>4</sub> W <sub>12</sub> O <sub>42</sub> ]·12H <sub>2</sub> O; space group: P-1.                                         |
| CAQWOJ        | 1.938 + 2.159 Å                                         | Sleyimi, S.; Lahbib, K.; Rahmouni, N.; Rzaigui, M.; Besbes-Hentati, S.; Abid, S. <i>J. Mol. Struct.</i> <b>2017</b> , 1144, 406. (H <sub>3</sub> N(CH <sub>2</sub> ) <sub>2</sub> NH <sub>3</sub> ) <sub>2</sub> [Cu(H <sub>2</sub> O) <sub>6</sub> ][Cu <sub>2</sub> Li <sub>2</sub> P <sub>12</sub> H <sub>16</sub> O <sub>44</sub> ]; space group: P-1. |
| GIVVIS        | 1.939 + 2.458 Å                                         | Feng, S.; Ma, L.; Feng, G.; Jiao, Y.; Zhu, M. <i>J. Mol. Struct.</i> <b>2014</b> , 1059, 27;<br>[Cu(H <sub>2</sub> O) <sub>6</sub> ][Cu <sub>2</sub> C <sub>16</sub> H <sub>20</sub> BrN <sub>2</sub> O <sub>12</sub> ] <sub>2</sub> ·4H <sub>2</sub> O; space group: P2 <sub>1</sub> /c.                                                                  |
| RAGXAA        | 1.943 + 2.515 Å                                         | Martsinko, E. E.; Pesaroglo, A. G.; Minacheva, L. K.; Seifullina, I. I.; Sergienko, V. S.; Churakov, A. V. <i>Russ. J. Inorg. Chem.</i> <b>2011</b> , 56, 228. [Cu(H <sub>2</sub> O) <sub>6</sub> ][Cu <sub>2</sub> GeC <sub>10</sub> H <sub>14</sub> O <sub>18</sub> ]·4H <sub>2</sub> O; space group: P2 <sub>1</sub> /n.                                |
| LOSXID        | 1.947 + 2.515 Å                                         | Squatrito, P. J.; Lambright-Mutthamsetty, K. J.; Giolando, P. A.; Kirschbaum, K. <i>Acta Crystallogr., Sect. E</i> <b>2019</b> , 75, 1801. [Cu(H <sub>2</sub> O) <sub>6</sub> ]( <i>p</i> -O <sub>3</sub> SC <sub>6</sub> H <sub>4</sub> COOH) <sub>2</sub> ; space group P-1.                                                                             |
| AYACAE        | 1.953 + 2.166 Å                                         | Guo, Q.-L.; Zhu, W.-X.; Ma, S.-L.; Dong, S.-J.; Xu, M.-Q. <i>Polyhedron</i> <b>2004</b> , 23, 1461.<br>(C <sub>12</sub> H <sub>28</sub> N <sub>2</sub> O <sub>4</sub> ) <sub>2</sub> [Cu(H <sub>2</sub> O) <sub>6</sub> ][Cu <sub>2</sub> C <sub>48</sub> H <sub>30</sub> O <sub>36</sub> S <sub>16</sub> ]·12H <sub>2</sub> O; space group: P-1.          |
| 65683         | 1.955 + 2.382 Å                                         | Gallucci, J. C.; Gerkin, R. E., <i>Acta Crystallogr. Sect. C</i> <b>1989</b> , 45, 1279. [Cu(H <sub>2</sub> O) <sub>6</sub> ](ClO <sub>4</sub> ) <sub>2</sub> ; space group: P2 <sub>1</sub> /c.                                                                                                                                                           |
| KAGNEM        | 1.957 + 2.418 Å                                         | Ma, J.-F.; Yang, J.; Liu, J.-F. <i>Acta Crystallogr., Sect E</i> <b>2003</b> , 59, m485.<br>[Cu(H <sub>2</sub> O) <sub>6</sub> ](C <sub>7</sub> H <sub>5</sub> O <sub>6</sub> S) <sub>2</sub> ·2H <sub>2</sub> O; space group: P-1.                                                                                                                        |
| WUQQAC        | 1.957 + 2.398 Å                                         | Lukianova, T. J.; Kinzhybalo, V.; Pietraszko, A. <i>Acta Crystallogr., Sect E</i> <b>2015</b> , 71, m191.<br>[Cu(H <sub>2</sub> O) <sub>6</sub> ](C <sub>5</sub> H <sub>7</sub> N <sub>2</sub> ) <sub>2</sub> (SO <sub>4</sub> ) <sub>2</sub> ·4H <sub>2</sub> O; space group: P-1.                                                                        |
| KAYWAI        | 1.958 + 2.332 Å                                         | Durif, A.; Averbuch-Pouchot, M. T. <i>Acta Crystallogr., Sect C</i> <b>1989</b> , 45, 1884.<br>(C <sub>2</sub> H <sub>10</sub> N <sub>2</sub> ) <sub>2</sub> [Cu(H <sub>2</sub> O) <sub>6</sub> ] <sub>2</sub> P <sub>6</sub> O <sub>18</sub> ; space group: P2 <sub>1</sub> /a.                                                                           |
| NINVOW        | 1.959 + 2.506 Å                                         | Costantino, F.; Bataille, T.; Audebrand, N.; Le Fur, E.; Sangregorio, C. <i>Cryst. Growth Des.</i> <b>2007</b> , 7, 1881. [Cu(H <sub>2</sub> O) <sub>6</sub> ][Cu <sub>2</sub> C <sub>10</sub> H <sub>26</sub> N <sub>2</sub> O <sub>14</sub> P <sub>4</sub> ]·2H <sub>2</sub> O; space group: P2 <sub>1</sub> /n.                                         |
| RORRAT        | 1.959 + 2.135 Å                                         | Thuery, P.; Harrowfield, J. <i>Cryst. Growth Des.</i> <b>2014</b> , 14, 4214. [Cu(H <sub>2</sub> O) <sub>6</sub> ][UC <sub>9</sub> H <sub>9</sub> O <sub>8</sub> ]·2H <sub>2</sub> O; space group: Pnm.                                                                                                                                                    |



|          |                 |                                                                                                                                                                                                                                                                                                                                                            |
|----------|-----------------|------------------------------------------------------------------------------------------------------------------------------------------------------------------------------------------------------------------------------------------------------------------------------------------------------------------------------------------------------------|
| YEDJUM   | 1.960 + 2.385 Å | Shamuratov, E. B.; Sharipov, Kh. T.; Batsanov, A. S.; Struchkov, Y. T.; Khudoyarov, A. B.; Mirdzhalalov, F. F., <i>Koord. Khim.</i> <b>1993</b> , <i>19</i> , 155. (C <sub>8</sub> H <sub>11</sub> N <sub>4</sub> O) <sub>2</sub> [Cu(H <sub>2</sub> O) <sub>6</sub> ](SO <sub>4</sub> ) <sub>2</sub> ·2H <sub>2</sub> O; space group: P2 <sub>1</sub> /c. |
| WULSAY03 | 1.961 + 2.238 Å | Zhang, W.; Chen, L.-Z.; Xiong, R.-G.; Nakamura, T.; Huang, S. D. <i>J. Am. Chem. Soc.</i> <b>2009</b> , <i>131</i> , 12544. [Cu(H <sub>2</sub> O) <sub>6</sub> ](C <sub>6</sub> H <sub>14</sub> N <sub>2</sub> )(SeO <sub>4</sub> ) <sub>2</sub> ; space group: P2 <sub>1</sub> /c.                                                                        |
| KEBZEX   | 1.962 + 2.373 Å | Ghosh, S. K.; El Fallah, M. S.; Ribas, J.; Bharadwaj, P. K. <i>Inorg. Chim. Acta</i> <b>2006</b> , <i>359</i> , 468. [Cu(H <sub>2</sub> O) <sub>6</sub> ][Cu <sub>2</sub> C <sub>16</sub> H <sub>8</sub> N <sub>2</sub> O <sub>14</sub> ]; space group: P-1.                                                                                               |
| 112393   | 1.962 + 2.424 Å | Mazej, Z.; Goreshnik, E. <i>Eur. J. Inorg. Chem.</i> <b>2021</b> , 1776. [Cu(H <sub>2</sub> O) <sub>6</sub> ](SbF <sub>6</sub> ) <sub>2</sub> ; space group: P2 <sub>1</sub> /n                                                                                                                                                                            |
| AQOXIO   | 1.964 + 2.380 Å | Muesmann, T. W. T.; Zitzer, C.; Mietrach, A.; Kluner, T.; Christoffers, J.; Wickleder, M. S. <i>Dalton Trans.</i> <b>2011</b> , <i>40</i> , 3128. [Cu(H <sub>2</sub> O) <sub>6</sub> ](p-C <sub>6</sub> F <sub>4</sub> (SO <sub>3</sub> ) <sub>2</sub> ); space group: P-1.                                                                                |
| 8225     | 1.965 + 2.385 Å | Ginderow, D.; Cesbron, F., <i>Acta Crystallogr. Sect. B</i> <b>1979</b> , <i>35</i> , 2499. [Cu(H <sub>2</sub> O) <sub>6</sub> ][Al(H <sub>2</sub> O) <sub>6</sub> ](SO <sub>4</sub> ) <sub>2</sub> ·2H <sub>2</sub> O; space group: P-1.                                                                                                                  |
| SAFLAM01 | 1.965 + 2.321 Å | Kennard, C. H. L.; Smith, G., <i>Z. Kristallogr.</i> <b>1989</b> , <i>188</i> , 63. [Cu(H <sub>2</sub> O) <sub>6</sub> ][CuC <sub>16</sub> H <sub>16</sub> O <sub>10</sub> ]; space group: P2 <sub>1</sub> /c.                                                                                                                                             |
| JADPEJ   | 1.966 + 2.382 Å | Averbuch-Pouchot, M. T.; Durif, A., <i>Acta Crystallogr., Sect. C</i> <b>1989</b> , <i>45</i> , 46. (C <sub>2</sub> H <sub>10</sub> N <sub>2</sub> ) <sub>3</sub> [Cu(H <sub>2</sub> O) <sub>6</sub> ](P <sub>4</sub> O <sub>12</sub> ) <sub>2</sub> ·8H <sub>2</sub> O; space group: P2 <sub>1</sub> /n.                                                  |
| AVUZAT   | 1.967 + 2.335 Å | Wei, M.-L.; Zhuang, P.-F.; Wang, J.-H.; Wang, X.-X. <i>J. Mol. Struct.</i> <b>2011</b> , <i>995</i> , 51. (H <sub>3</sub> O)[Cu(H <sub>2</sub> O) <sub>6</sub> ][W <sub>12</sub> PO <sub>40</sub> ]·4C <sub>6</sub> H <sub>5</sub> NO <sub>3</sub> ·4H <sub>2</sub> O; space group: P-1                                                                    |
| ZOPFOB   | 1.967 + 2.389 Å | Kammoun, O.; Naili, H.; Rekik, W.; Bataille, T.; Mhiri, T. CCDC code 1033930, <b>2014</b> (C <sub>7</sub> H <sub>7</sub> N <sub>2</sub> ) <sub>2</sub> [Cu(H <sub>2</sub> O) <sub>6</sub> ](SO <sub>4</sub> ) <sub>2</sub> ·4H <sub>2</sub> O; space group: P-1.                                                                                           |
| 2621     | 1.968 + 2.352 Å | Fischer, J.; Weiss, R., <i>Acta Crystallogr. Sect. B</i> <b>1973</b> , <i>29</i> , 1963. [Cu(H <sub>2</sub> O) <sub>6</sub> ]Cu <sub>2</sub> [ZrF <sub>7</sub> ] <sub>2</sub> ·10 H <sub>2</sub> O; ; space group: P2 <sub>1</sub> /c.                                                                                                                     |
| 55071    | 1.968 + 2.351 Å | Botova, M.; Nagel, Haeuseler, H. <i>Z. Anorg. Allg. Chem.</i> <b>2004</b> , <i>630</i> , 179. [Cu(H <sub>2</sub> O) <sub>6</sub> ]H <sub>4</sub> I <sub>2</sub> O <sub>10</sub> ; space group: P2 <sub>1</sub> /c.                                                                                                                                         |
| DODDOP   | 1.968 + 2.412 Å | Zviedre, I. I.; Bel'skii, V. K.; Shvarts, E.M., <i>Latv. PSR Zinat. Akad. Vestis, Khim. Ser.</i> <b>1985</b> , 672. [Cu(H <sub>2</sub> O) <sub>6</sub> ](C <sub>3</sub> H <sub>8</sub> BO <sub>4</sub> ) <sub>2</sub> ·4H <sub>2</sub> O; space group: P-1.                                                                                                |
| FEZWAL   | 1.968 + 2.404 Å | Aycan, T. CDCC deposition 1566697, <b>2018</b> . [Cu(H <sub>2</sub> O) <sub>6</sub> ][CuC <sub>12</sub> H <sub>20</sub> N <sub>4</sub> O <sub>6</sub> ](SO <sub>4</sub> ) <sub>2</sub> ·2H <sub>2</sub> O; space group: P2 <sub>1</sub>                                                                                                                    |
| FEZWAL01 | 1.968 + 2.406 Å | Aycan, T. CDCC deposition 1889137, <b>2021</b> . [Cu(H <sub>2</sub> O) <sub>6</sub> ][CuC <sub>12</sub> H <sub>20</sub> N <sub>4</sub> O <sub>6</sub> ](SO <sub>4</sub> ) <sub>2</sub> ·2H <sub>2</sub> O; space group: P2 <sub>1</sub> /c.                                                                                                                |
| JAHWOI   | 1.968 + 2.299 Å | Edis, Z.; Raheja, R.; Bloukh, S. H.; Bhandare, R. R.; Sara, H. A.; Reiss, G. <i>Polymers</i> <b>2021</b> , <i>13</i> , 1005. [Cu(H <sub>2</sub> O) <sub>6</sub> ](I <sub>3</sub> ) <sub>2</sub> ·2I <sub>2</sub> ·5C <sub>8</sub> H <sub>16</sub> O <sub>4</sub> ; space group: P-1.                                                                       |

|          |                 |                                                                                                                                                                                                                                                                                                                                        |
|----------|-----------------|----------------------------------------------------------------------------------------------------------------------------------------------------------------------------------------------------------------------------------------------------------------------------------------------------------------------------------------|
| NERKUQ   | 1.968 + 2.376 Å | Bao-Qing; Hao-Ling sun; Song Gao; Guang-Xian Xu, <i>Inorg. Chem.</i> <b>2001</b> , <i>40</i> , 6247.<br>[Cu(H <sub>2</sub> O) <sub>6</sub> ]Cl <sub>2</sub> ·2(C <sub>10</sub> H <sub>8</sub> N <sub>2</sub> O <sub>2</sub> )·2H <sub>2</sub> O; space group: P-1.                                                                     |
| 17071    | 1.969 + 2.398 Å | Mereiter, K., <i>Tschermaks Mineralogische und Petrographische Mitteilungen</i> <b>1982</b> , <i>30</i> , 47.<br>[Cu(H <sub>2</sub> O) <sub>6</sub> ](UO <sub>2</sub> ) <sub>2</sub> (OH) <sub>2</sub> (SO <sub>4</sub> ) <sub>2</sub> ·2H <sub>2</sub> O; space group: P-1.                                                           |
| 281320   | 1.969 + 2.315 Å | Iida, A.; Ozeki, T., <i>Acta Crystallogr. Sect. C</i> <b>2003</b> , <i>59</i> , i41. [Cu(H <sub>2</sub> O) <sub>6</sub> ] <sub>3</sub> [V <sub>10</sub> O <sub>28</sub> ]·17H <sub>2</sub> O; space group: P-1.                                                                                                                        |
| SARGAW   | 1.969 + 2.372 Å | Koferstein, R.; Arnold, M.; Robl, C. <i>Z. Anorg. Allg. Chem.</i> <b>2017</b> , <i>643</i> , 276.<br>[Cu(H <sub>2</sub> O) <sub>6</sub> ][CuC <sub>2</sub> H <sub>4</sub> O <sub>6</sub> P] <sub>2</sub> ·2H <sub>2</sub> O; space group: P-1.                                                                                         |
| WULSAY01 | 1.969 + 2.387 Å | Zhang, W.; Chen, L.-Z.; Xiong, R.-G.; Nakamura, T.; Huang, S. D. <i>J. Am. Chem. Soc.</i> <b>2009</b> , <i>131</i> , 12544. [Cu(H <sub>2</sub> O) <sub>6</sub> ](C <sub>6</sub> H <sub>14</sub> N <sub>2</sub> )(SeO <sub>4</sub> ) <sub>2</sub> ; space group: P2 <sub>1</sub> /c.                                                    |
| 34760    | 1.970 + 2.367 Å | Ray, S.; Zalkin, A.; Templeton, D. H., <i>Acta Crystallogr. Sect. B</i> <b>1973</b> , <i>29</i> , 2748. [Cu(H <sub>2</sub> O) <sub>6</sub> ]SiF <sub>6</sub> ; space group: R-3.                                                                                                                                                       |
| CUMALH   | 1.970 + 2.462 Å | Dimitrova, G. I.; Ablov, A. V.; Kiosse, G. A.; Popovich, G. A.; Malinovski, T. I.; Bourshteyn, I. F., <i>Dokl. Akad. Nauk SSSR</i> <b>1974</b> , <i>216</i> , 1055. [Cu(H <sub>2</sub> O) <sub>6</sub> ][Cu(C <sub>3</sub> H <sub>2</sub> O <sub>4</sub> )(H <sub>2</sub> O) <sub>2</sub> ]; space group: P-1.                         |
| DEVMAT02 | 1.970 + 2.384 Å | Nkhili, N. L.; Rekik, W.; Naili, H.; Mhiri, T.; Bataille, T. <i>J. Chem. Cryst.</i> <b>2011</b> , <i>41</i> , 1680.<br>(C <sub>6</sub> H <sub>14</sub> N <sub>2</sub> )[Cu(H <sub>2</sub> O) <sub>6</sub> ](SO <sub>4</sub> ) <sub>2</sub> ; space group: P2 <sub>1</sub> /n.                                                          |
| FINNUM   | 1.970 + 2.283 Å | Sharma, R. P.; Sharma, R.; Bala, R.; Rychlewska, U.; Warzajtis, B. <i>J. Mol. Struct.</i> <b>2005</b> , <i>738</i> , 291.<br>[Cu(H <sub>2</sub> O) <sub>6</sub> ](C <sub>10</sub> H <sub>7</sub> SO <sub>3</sub> ) <sub>2</sub> ; space group: P2 <sub>1</sub> /n.                                                                     |
| BENSCU   | 1.971 + 2.262 Å | Couldwell, C.; Prout, K.; Robey, D.; Taylor, R.; Rossotti, F. J. C., <i>Acta Crystallogr. Sect. B</i> <b>1978</b> , <i>34</i> , 1491. [Cu(H <sub>2</sub> O) <sub>6</sub> ](C <sub>6</sub> H <sub>5</sub> SO <sub>3</sub> ) <sub>2</sub> ; space group: P-1.                                                                            |
| CUMALH01 | 1.971 + 2.408 Å | Filippova, I. G. <i>Koord. Khim.</i> <b>2000</b> , <i>26</i> , 295. [Cu(H <sub>2</sub> O) <sub>6</sub> ][Cu(C <sub>3</sub> H <sub>2</sub> O <sub>4</sub> )(H <sub>2</sub> O) <sub>2</sub> ]; space group: P-1.                                                                                                                         |
| LOCBOU   | 1.972 + 2.421 Å | Navarro, J. A. R.; Freisinger, E.; Lippert, B., <i>Inorg. Chem.</i> <b>2000</b> , <i>39</i> , 2301.<br>[Pt(C <sub>14</sub> H <sub>44</sub> N <sub>16</sub> O <sub>4</sub> )[Cu(H <sub>2</sub> O) <sub>6</sub> ](ClO <sub>4</sub> ) <sub>10</sub> ·9H <sub>2</sub> O; space group: P2 <sub>1</sub> /c; space group: P2 <sub>1</sub> /n. |
| POKBID   | 1.972 + 2.529 Å | Butsch, K.; Sandleben, A.; Dokoochaki, M. H.; Zolghadr, A. R.; Klein, A. <i>Inorganics</i> 2019, <i>7</i> , 53.<br>[Cu(H <sub>2</sub> O) <sub>6</sub> ][Cu <sub>2</sub> C <sub>14</sub> H <sub>6</sub> Cl <sub>2</sub> N <sub>2</sub> O <sub>8</sub> ]; space group: P-1.                                                              |
| WIHLAC   | 1.972 + 2.310 Å | Wikaira, J. L.; Landee, C. P.; Turnbull, M. M. <i>Acta Crystallogr. Sect. E</i> <b>2013</b> , <i>69</i> , m229.<br>[Cu(H <sub>2</sub> O) <sub>6</sub> ](BF <sub>4</sub> ) <sub>2</sub> ·3C <sub>4</sub> H <sub>4</sub> N <sub>2</sub> O <sub>2</sub> ; space group: P-1.                                                               |
| NULDII   | 1.974 + 2.360 Å | Yan, Y.-K.; Tan, K.-F.; Kurmoo, M. <i>Inorg. Chim. Acta</i> <b>2009</b> , <i>362</i> , 4017.<br>[Cu(H <sub>2</sub> O) <sub>6</sub> ][Cu <sub>2</sub> C <sub>16</sub> H <sub>20</sub> N <sub>4</sub> O <sub>14</sub> ]·2H <sub>2</sub> O; space group: P-1.                                                                             |
| SAFLAM   | 1.974 + 2.366 Å | Wang Honghui; Zhu Naijue; Fu Heng; Li Roncchang; Wang Kui, <i>Sci. Sin., Ser. B (Eng. Ed.)</i> <b>1988</b> , <i>31</i> , 20. [Cu(H <sub>2</sub> O) <sub>6</sub> ][CuC <sub>16</sub> H <sub>16</sub> O <sub>10</sub> ]; space group: P-1.                                                                                               |

|          |                 |                                                                                                                                                                                                                                                                                                                   |
|----------|-----------------|-------------------------------------------------------------------------------------------------------------------------------------------------------------------------------------------------------------------------------------------------------------------------------------------------------------------|
| CUMALH02 | 1.975 + 2.406 Å | Rodriguez-Martin, Y.; Sanchiz, J.; Ruiz-Perez, C.; Lloret, F.; Julve, M., <i>Cryst. Eng. Comm.</i> <b>2002</b> , <i>4</i> , 631. [Cu(H <sub>2</sub> O) <sub>6</sub> ][Cu(C <sub>3</sub> H <sub>2</sub> O <sub>4</sub> )(H <sub>2</sub> O) <sub>2</sub> ]; space group: P-1.                                       |
| KONBEX   | 1.975 + 2.317 Å | Clegg, W.; Harrington, R. W.; Richardson, A. S. CCDC deposition 1922490, <b>2019</b> . [Cu(H <sub>2</sub> O) <sub>6</sub> ][CuC <sub>14</sub> H <sub>24</sub> N <sub>8</sub> O <sub>6</sub> ](S <sub>2</sub> O <sub>4</sub> ) <sub>2</sub> ; space group: P-1.                                                    |
| 2620     | 1.976 + 2.408 Å | Fischer, J.; Elchinger, R.; Weiss, R., <i>Acta Crystallogr. Sect. B</i> <b>1973</b> , <i>29</i> , 1967; <i>Acta Crystallogr. Sect. A</i> <b>1969</b> , <i>25</i> , S174; <i>Chem. Commun.</i> <b>1967</b> , 329. [Cu(H <sub>2</sub> O) <sub>6</sub> ] <sub>2</sub> [ZrF <sub>8</sub> ]; space group: C2/c.        |
| UGOZAT   | 1.976 + 2.314 Å | Rekik, W.; Nkhili, N. L.; Naili, H.; Dahaoui, S. Z. <i>Anorg. Allg. Chem.</i> <b>2014</b> , <i>640</i> , 2603. (C <sub>6</sub> H <sub>14</sub> N <sub>2</sub> )[Cu(H <sub>2</sub> O) <sub>6</sub> ][Cu(H <sub>2</sub> O) <sub>4</sub> (SeO <sub>4</sub> ) <sub>2</sub> ]; space group: P2 <sub>1</sub> /n.        |
| 20925    | 1.977 + 2.410 Å | Shchegoleva, T. M.; Iskhakova, L. D.; Ovanisyan, S. M.; Shakhnazaryan, A. A.; Trunov, V. K., <i>Zh. Neorg. Khim.</i> <b>1983</b> , <i>28</i> , 2271. [Cu(H <sub>2</sub> O) <sub>6</sub> ][SbF <sub>4</sub> ] <sub>2</sub> ; space group: P2 <sub>1</sub> /c.                                                      |
| DEVMAT01 | 1.977 + 2.395 Å | Nkhili, N. L.; Rekik, W.; Bataille, T.; Mhiri, T.; <i>Polyhedron</i> <b>2006</b> , <i>25</i> , 3543. (C <sub>6</sub> H <sub>14</sub> N <sub>2</sub> )[Cu(H <sub>2</sub> O) <sub>6</sub> ](SO <sub>4</sub> ) <sub>2</sub> ; space group: P2 <sub>1</sub> /n.                                                       |
| WULSAY02 | 1.978 + 2.380 Å | Zhang, W.; Chen, L.-Z.; Xiong, R.-G.; Nakamura, T.; Huang, S. D. <i>J. Am. Chem. Soc.</i> <b>2009</b> , <i>131</i> , 12544. [Cu(H <sub>2</sub> O) <sub>6</sub> ](C <sub>6</sub> H <sub>14</sub> N <sub>2</sub> )(SeO <sub>4</sub> ) <sub>2</sub> ; space group: P2 <sub>1</sub> /c.                               |
| DEVMAT   | 1.979 + 2.380 Å | Nkhili, N. L.; Rekik, W.; Bataille, T.; Mhiri, T.; <i>Polyhedron</i> <b>2006</b> , <i>25</i> , 3543. (C <sub>6</sub> H <sub>14</sub> N <sub>2</sub> )[Cu(H <sub>2</sub> O) <sub>6</sub> ](SO <sub>4</sub> ) <sub>2</sub> ; space group: P2 <sub>1</sub> /a.                                                       |
| NAYGUR   | 1.979 + 2.300 Å | Murdock, C. R.; Lu, Z.; Jenkins, D, M, <i>Dalton Trans.</i> <b>2012</b> , <i>41</i> , 7839. [Cu(H <sub>2</sub> O) <sub>6</sub> ][CuC <sub>8</sub> H <sub>10</sub> N <sub>6</sub> O <sub>4</sub> S]SO <sub>4</sub> ·3H <sub>2</sub> O; space group: P2 <sub>1</sub> 2 <sub>1</sub> 2 <sub>1</sub> .                |
| UVOQON   | 1.979 + 2.355 Å | Hassan, D, B.; Rekik, W.; Roza, A. O.; Mefteh, F. B.; Roisnel, T.; Bataille, T.; Naili, H. <i>Polyhedron</i> <b>2016</b> , <i>119</i> , 238. (C <sub>4</sub> H <sub>12</sub> N <sub>2</sub> ) <sub>3</sub> [Cu(H <sub>2</sub> O) <sub>6</sub> ](NO <sub>3</sub> ) <sub>8</sub> ; space group: P-1.                |
| CDSRCA10 | 1.980 + 2.307 Å | Benedetti, E.; di Blasio, B.; Pedone, C.; Scalone, M.; Toniolo, C., <i>Pept. Str. Bio. Funct. Symp.</i> <b>1979</b> , 141. [Cu(H <sub>2</sub> O) <sub>6</sub> ](ClO <sub>4</sub> ) <sub>2</sub> ·2(C <sub>6</sub> H <sub>10</sub> N <sub>2</sub> O <sub>2</sub> ) <sub>2</sub> ; space group: P2 <sub>1</sub> /c. |
| DUWWEX   | 1.980 + 2.321 Å | Glowiak, T.; Podgorska, I., <i>Inorg. Chim. Acta</i> <b>1986</b> 21/c, <i>125</i> , 83. [Cu(H <sub>2</sub> O) <sub>6</sub> ](C <sub>12</sub> H <sub>10</sub> PO <sub>4</sub> ) <sub>2</sub> ·2C <sub>2</sub> H <sub>5</sub> NO <sub>2</sub> ; space group: P-1.                                                   |
| KARHOD   | 1.980 + 2.270 Å | Smith, G.; Wermuth, U. D. <i>Acta Crystallogr., Sect. C</i> <b>2017</b> , <i>73</i> , 325. (AsO(OH) <sub>2</sub> C <sub>6</sub> HH <sub>4</sub> NH <sub>3</sub> ) <sub>2</sub> [Cu(H <sub>2</sub> O) <sub>6</sub> ](SO <sub>4</sub> ) <sub>2</sub> ·2H <sub>2</sub> O; space group: P2 <sub>1</sub> /c.           |
| 49501    | 1.981 + 2.304 Å | Hathaway, B. J.; Hewat, A. W. <i>J. Solid State Chem.</i> <b>1984</b> , <i>51</i> , 364. (ND <sub>4</sub> ) <sub>2</sub> [Cu(D <sub>2</sub> O) <sub>6</sub> ](SO <sub>4</sub> ) <sub>2</sub>                                                                                                                      |
| HETFIW   | 1.981 + 2.465 Å | Zhang, Z.-T.; Wang, Q.-Y.; He, Y.; Wang, X.-B.; Xue, D.; Zheng, J.-B. <i>Chem. J. Chin. Univ., Chon. Ed.</i> <b>2005</b> , <i>26</i> , 2247. [Cu(H <sub>2</sub> O) <sub>6</sub> ](C <sub>17</sub> H <sub>13</sub> O <sub>7</sub> S) <sub>2</sub> ·8H <sub>2</sub> O; space group: C2/c                            |
| 2918     | 1.982 + 2.317 Å | Shields, K. G.; van der Zee, J. J.; Kennard, C. H. L., <i>Cryst. Struct. Commun.</i> <b>1972</b> , <i>1</i> , 371. Tl <sub>2</sub> [Cu(H <sub>2</sub> O) <sub>6</sub> ](SO <sub>4</sub> ) <sub>2</sub> ; space group: P2 <sub>1</sub> /a.                                                                         |
| EBIKOR   | 1.982 + 2.416 Å | Shi, L.-X.; Xu, X.; Wu, C.-D. <i>CrystEngComm</i> <b>2011</b> , <i>13</i> , 6027. [Cu(H <sub>2</sub> O) <sub>6</sub> ][Gd <sub>2</sub> C <sub>18</sub> H <sub>10</sub> N <sub>2</sub> O <sub>20</sub> ]·4H <sub>2</sub> O; space group: P-1.                                                                      |

|        |                 |                                                                                                                                                                                                                                                                                                       |
|--------|-----------------|-------------------------------------------------------------------------------------------------------------------------------------------------------------------------------------------------------------------------------------------------------------------------------------------------------|
| VAFKIX | 1.982 + 2.301 Å | Dalrymple, S. A.; Parvez, M.; Shimizu, G. K. H. <i>Inorg. Chem.</i> <b>2002</b> , <i>41</i> , 6986.<br>[Cu(H <sub>2</sub> O) <sub>6</sub> ] <sub>3</sub> (C <sub>9</sub> H <sub>9</sub> S <sub>3</sub> O <sub>9</sub> ) <sub>2</sub> ·1.3H <sub>2</sub> O; space group: P2 <sub>1</sub> /n.           |
| 78381  | 1.981 + 2.298 Å | Iversen, B. B.; Larsen, F. K.; Reynolds, P. A.; Figgis, B. N. <i>Acta Chem. Scand.</i> <b>1994</b> , <i>48</i> , 800.<br>(ND <sub>4</sub> ) <sub>2</sub> [Cu(D <sub>2</sub> O) <sub>6</sub> ](SO <sub>4</sub> ) <sub>2</sub> ; space group: P2 <sub>1</sub> /a.                                       |
| 281319 | 1.984 + 2.390 Å | Iida, A.; Ozeki, T., <i>Acta Crystallogr. Sect. C</i> <b>2003</b> , <i>59</i> , i41. Na <sub>4</sub> [Cu(H <sub>2</sub> O) <sub>6</sub> ][V <sub>10</sub> O <sub>28</sub> ]·17H <sub>2</sub> O; space group: P-1.                                                                                     |
| 2926   | 1.985 + 2.314 Å | Shields, K. G.; Kennard, C. H. L., <i>Cryst. Struct. Commun.</i> <b>1972</b> , <i>1</i> , 189. Cs <sub>2</sub> [Cu(H <sub>2</sub> O) <sub>6</sub> ](SO <sub>4</sub> ) <sub>2</sub> ; space group: P2 <sub>1</sub> /a.                                                                                 |
| 15177  | 1.985 + 2.437 Å | Wood, M. M., <i>Am. Mineral.</i> <b>1970</b> , <i>55</i> , 729. Fe <sub>2</sub> [Cu(H <sub>2</sub> O) <sub>6</sub> ](SO <sub>4</sub> ) <sub>2</sub> ; space group: P2 <sub>1</sub> /a.                                                                                                                |
| 66707  | 1.985 + 2.301 Å | Figgis, B. N.; Khor, L.; Kucharski, E. S.; Reynolds, P. A. <i>Acta Crystallogr., Sect B</i> <b>1992</b> , <i>48</i> , 144.<br>(ND <sub>4</sub> ) <sub>2</sub> [Cu(D <sub>2</sub> O) <sub>6</sub> ](SO <sub>4</sub> ) <sub>2</sub> ; space group: P2 <sub>1</sub> /a.                                  |
| 249345 | 1.985 + 2.311 Å | Ballirano, P.; Belardi, G.; Bosi, F. <i>Acta Crystallogr., Sect. E</i> <b>2007</b> , <i>63</i> , m165; space group: P2 <sub>1</sub> /a.                                                                                                                                                               |
| 250916 | 1.985 + 2.306 Å | Simmons, C. J.; Stratemeier, H.; Hitchman, M. A.; Riley, M. J. <i>Inorg. Chem.</i> <b>2013</b> , <i>52</i> , 10481.<br>Rb <sub>2</sub> [Cu(H <sub>2</sub> O) <sub>6</sub> ](SeO <sub>4</sub> ) <sub>2</sub> ; space group: P2 <sub>1</sub> /a.                                                        |
| PARBIV | 1.985 + 2.154 Å | Lima, I. M. P.; Esteves, C. V.; Delgado, R.; Hermann, P.; Kotek, J.; Sevcikova, R.; Lubal, P. <i>Eur. J. Inorg. Chem.</i> <b>2012</b> , 2533. [Cu(H <sub>2</sub> O) <sub>6</sub> ][CuC <sub>12</sub> H <sub>30</sub> N <sub>4</sub> O <sub>13</sub> P <sub>4</sub> ]; space group: Pcca.              |
| 171283 | 1.986 + 2.329 Å | Simmons, C. J.; Stratemeier, H.; Hitchman, M. A.; Riley, M. J. <i>Inorg. Chem.</i> <b>2006</b> , <i>45</i> , 1021.<br>K <sub>2</sub> [Cu(H <sub>2</sub> O) <sub>6</sub> ](SO <sub>4</sub> ) <sub>2</sub> ; space group: P2 <sub>1</sub> /a.                                                           |
| 171279 | 1.987 + 2.313 Å | Simmons, C. J.; Stratemeier, H.; Hitchman, M. A.; Riley, M. J. <i>Inorg. Chem.</i> <b>2006</b> , <i>45</i> , 1021.<br>K <sub>2</sub> [Cu(H <sub>2</sub> O) <sub>6</sub> ](SeO <sub>4</sub> ) <sub>2</sub> ; space group: P2 <sub>1</sub> /a.                                                          |
| 81463  | 1.988 + 2.315 Å | Rauw, W.; Ahsbahs, H.; Hitchman, M. A.; Lukin, S.; Reinen, D.; Schultz, A. J.; Simmons, C. J.; Stratemeier, H., <i>Inorg. Chem.</i> <b>1996</b> , <i>35</i> , 1902. K <sub>2</sub> [Cu(H <sub>2</sub> O) <sub>6</sub> ](SO <sub>4</sub> ) <sub>2</sub> ; space group: P2 <sub>1</sub> /a.             |
| 250988 | 1.985 + 2.316 Å | Simmons, C. J.; Stratemeier, H.; Hitchman, M. A.; Riley, M. J. <i>Inorg. Chem.</i> <b>2013</b> , <i>52</i> , 10481.<br>K <sub>2</sub> [Cu(H <sub>2</sub> O) <sub>6</sub> ](SeO <sub>4</sub> ) <sub>2</sub> ; space group: P2 <sub>1</sub> /a.                                                         |
| 73451  | 1.986 + 2.300 Å | Figgis, B. N.; Iversen, B. B.; Larsen, F. K.; Reynolds, P. A. <i>Acta Crystallogr., Sect. B</i> <b>1993</b> , <i>49</i> , 794. (ND <sub>4</sub> ) <sub>2</sub> [Cu(D <sub>2</sub> O) <sub>6</sub> ](SO <sub>4</sub> ) <sub>2</sub> ; space group: P2 <sub>1</sub> /a.                                 |
| 280384 | 1.988 + 2.277 Å | Figgis, B. N.; Sobolev, A. N.; Simmons, C. J.; Hitchman, M. A.; Stratemeier, H.; Riley, M. J., <i>Acta Crystallogr. Sect. B</i> <b>2000</b> , <i>56</i> , 438. (NH <sub>4</sub> ) <sub>2</sub> [Cu(H <sub>2</sub> O) <sub>6</sub> ](SO <sub>4</sub> ) <sub>2</sub> ; space group: P2 <sub>1</sub> /a. |
| 281341 | 1.988 + 2.320 Å | Bramsen, F.; Bond, A. D.; McKenzie, C. J., <i>Acta Crystallogr. Sect. E</i> <b>2003</b> , <i>59</i> , i105.<br>[Cu(H <sub>2</sub> O) <sub>5</sub> H <sub>3</sub> O]ClO <sub>4</sub> ; space group: P3 <sub>2</sub> 2.                                                                                 |
| 710010 | 1.988 + 2.295 Å | Euler, H.; Barbier, B.; Meents, A.; Kirfel, A. <i>Z. Kristallogr. – New Struct.</i> <b>2009</b> , <i>224</i> , 360.<br>Tl <sub>2</sub> [Cu(H <sub>2</sub> O) <sub>6</sub> ](SeO <sub>4</sub> ) <sub>2</sub> ; space group: P2 <sub>1</sub> /a.                                                        |

|        |                 |                                                                                                                                                                                                                                                                                                                     |
|--------|-----------------|---------------------------------------------------------------------------------------------------------------------------------------------------------------------------------------------------------------------------------------------------------------------------------------------------------------------|
| 1713   | 1.989 + 2.334 Å | Nyberg, B., <i>Acta Crystallogr. Sect. B</i> <b>1978</b> , <i>34</i> , 1418. (NH <sub>4</sub> ) <sub>2</sub> [Cu(H <sub>2</sub> O) <sub>6</sub> ](CuSO <sub>3</sub> ) <sub>4</sub> ; space group: P4 <sub>2</sub> /nZ.                                                                                              |
| 280384 | 1.989 + 2.276 Å | Figgis, B. N.; Sobolev, A. N.; Simmons, C. J.; Hitchman, M. A.; Stratemeier, H.; Riley, M. J., <i>Acta Crystallogr. Sect. B</i> <b>2000</b> , <i>56</i> , 438. (NH <sub>4</sub> ) <sub>2</sub> [Cu(H <sub>2</sub> O) <sub>6</sub> ](SO <sub>4</sub> ) <sub>2</sub> ; space group: P2 <sub>1</sub> /a.               |
| 4306   | 1.990 + 2.317 Å | Smith, G.; Moore, F. H.; Kennard, C. H. L., <i>Cryst. Struct. Commun.</i> <b>1975</b> , <i>4</i> , 407. Rb <sub>2</sub> [Cu(H <sub>2</sub> O) <sub>6</sub> ](SO <sub>4</sub> ) <sub>2</sub> ; space group: P2 <sub>1</sub> /a.                                                                                      |
| FICRAK | 1.990 + 2.359 Å | Wu Guang; Chen Minqin; Wang Boyi; Chen Longchun; Zhang Hualin, <i>Jiegou Huaxue</i> <b>1987</b> , <i>6</i> , 187. [Cu(H <sub>2</sub> O) <sub>6</sub> ][Cu <sub>2</sub> C <sub>26</sub> H <sub>24</sub> N <sub>2</sub> O <sub>14</sub> ]·2H <sub>2</sub> O; space group: P2 <sub>1</sub> /n.                         |
| FIZJIK | 1.990 + 2.213 Å | Mahmoud, A. G.; Fatima M.; Guedes da Silva, C.; Mahmudov, K. T.; Pombeiro, A. J. L. <i>Dalton Trans.</i> <b>2019</b> , <i>48</i> , 1174. [Cu(H <sub>2</sub> O) <sub>6</sub> ](C <sub>20</sub> H <sub>16</sub> N <sub>3</sub> O <sub>5</sub> S) <sub>2</sub> ·2(CH <sub>3</sub> ) <sub>2</sub> NHO; space group: P-1 |
| 4307   | 1.991 + 2.207 Å | Whitnall, J.; Kennard, C. H. L.; Nimmo, J. K.; Moore, F. H., <i>Cryst. Struct. Commun.</i> <b>1975</b> , <i>4</i> , 709. K <sub>2</sub> [Cu(H <sub>2</sub> O) <sub>6</sub> ](SeO <sub>4</sub> ) <sub>2</sub> ; space group: P2 <sub>1</sub> /a.                                                                     |
| 74060  | 1.991 + 2.273 Å | Simmons, C. J.; Hitchman, M. A.; Stratemeier, H.; Schultz, A. J., <i>J. Am. Chem. Soc.</i> <b>1993</b> , <i>115</i> , 11304. (NH <sub>4</sub> ) <sub>2</sub> [Cu(H <sub>2</sub> O) <sub>6</sub> ](SO <sub>4</sub> ) <sub>2</sub> ; space group: P2 <sub>1</sub> /a.                                                 |
| 201524 | 1.991 + 2.278 Å | Alcock, N.; Duggan, M.; Murray, A.; Tyagi, S.; Hathaway, B. J.; Hewat, A. W., <i>J. Chem. Soc., Dalton Trans.</i> <b>1984</b> , <i>7</i> . (NH <sub>4</sub> ) <sub>2</sub> [Cu(H <sub>2</sub> O) <sub>6</sub> ](SO <sub>4</sub> ) <sub>2</sub> ; space group: P2 <sub>1</sub> /a.                                   |
| BATCUX | 1.992 + 2.380 Å | Pinalli, R.; Dalcanale, E.; Misztal, K.; Lucentini, R.; Ugozzoli, F.; Massera, C. CCDC ref. 1539301, <b>2017</b> . [Cu(H <sub>2</sub> O) <sub>6</sub> ](PF <sub>6</sub> ) <sub>2</sub> ·C <sub>68</sub> H <sub>68</sub> O <sub>12</sub> P <sub>4</sub> ·4CHCl <sub>3</sub> ·20H <sub>2</sub> O; space group: P4/n   |
| IVOPEP | 1.992 + 2.331 Å | Qin, X.; Chen, W.-J.; Zhang, Y.-Q.; Zhu, Q.-J.; Xue, S.-F.; Tao, Z. <i>J. Mol. Struct.</i> <b>2011</b> , <i>996</i> , 12. [Cu(H <sub>2</sub> O) <sub>6</sub> ] <sub>2</sub> (SO <sub>4</sub> ) <sub>2</sub> ·C <sub>44</sub> H <sub>48</sub> N <sub>24</sub> O <sub>12</sub> ·10H <sub>2</sub> O; space group: P-1. |
| 2924   | 1.994 + 2.307 Å | Shields, K. G.; van der Zee, J. J.; Kennard, C. H. L., <i>Cryst. Struct. Commun.</i> <b>1972</b> , <i>1</i> , 367. Rb <sub>2</sub> [Cu(H <sub>2</sub> O) <sub>6</sub> ](SO <sub>4</sub> ) <sub>2</sub> ; space group: P2 <sub>1</sub> /a.                                                                           |
| 74058  | 1.985 + 2.311 Å | Simmons, C. J.; Hitchman, M. A.; Stratemeier, H.; Schultz, A. J., <i>J. Am. Chem. Soc.</i> <b>1993</b> , <i>115</i> , 11304. (ND <sub>4</sub> ) <sub>2</sub> [Cu(D <sub>2</sub> O) <sub>6</sub> ](SO <sub>4</sub> ) <sub>2</sub> ; space group: P2 <sub>1</sub> /a.                                                 |
| 2619   | 1.996 + 2.327 Å | Fischer, J.; Weiss, R., <i>Acta Crystallogr. Sect. B</i> <b>1973</b> , <i>29</i> , 1958; <i>Chem. Commun.</i> <b>1968</b> , 1137. K <sub>2</sub> [Cu(H <sub>2</sub> O) <sub>6</sub> ][ZrF <sub>6</sub> ]; space group: P2 <sub>1</sub> /c.                                                                          |
| KADFIG | 1.997 + 2.406 Å | Imran, M.; Tas, M.; Sadiq-ur-Rehman, G.; Qadeer, G.; Wong W.-Y. <i>Z. Krist. Cryst. Mater.</i> <b>2010</b> , <i>225</i> , 36. [Cu(H <sub>2</sub> O) <sub>6</sub> ](C <sub>15</sub> H <sub>10</sub> NO <sub>4</sub> ) <sub>2</sub> ; space group: P-1.                                                               |
| 162317 | 2.004 + 2.275 Å | Bosi, F.; Belardi, G.; Ballirano, P. <i>Am. Mineral.</i> 2009, <i>94</i> , 74. K <sub>2</sub> [Cu(H <sub>2</sub> O) <sub>6</sub> ](SO <sub>4</sub> ) <sub>2</sub> ; space group: P2 <sub>1</sub> /a.                                                                                                                |
| 201523 | 2.004 + 2.250 Å | Alcock, N.; Duggan, M.; Murray, A.; Tyagi, S.; Hathaway, B. J.; Hewat, A. W., <i>J. Chem. Soc., Dalton Trans.</i> <b>1984</b> , <i>7</i> . (NH <sub>4</sub> ) <sub>2</sub> [Cu(H <sub>2</sub> O) <sub>6</sub> ](SO <sub>4</sub> ) <sub>2</sub> ; space group: P2 <sub>1</sub> /a.                                   |

|             |                                                 |                                                                                                                                                                                                                                                                                                                                                                |
|-------------|-------------------------------------------------|----------------------------------------------------------------------------------------------------------------------------------------------------------------------------------------------------------------------------------------------------------------------------------------------------------------------------------------------------------------|
| 2925        | 2.006 + 2.279 Å                                 | Robinson, D. J.; Kennard, C. H. L., <i>Cryst. Struct. Commun.</i> <b>1972</b> , <i>1</i> , 185. K <sub>2</sub> [Cu(H <sub>2</sub> O) <sub>6</sub> ](SO <sub>4</sub> ) <sub>2</sub> ; space group: P2 <sub>1</sub> /a.                                                                                                                                          |
| 409592      | 2.006 + 2.264 Å                                 | Fleck, M.; Kolitsch, U., <i>Z. Kristallogr. - New Crystal Structures</i> <b>2002</b> , <i>217</i> , 15. Rb <sub>2</sub> [Cu(H <sub>2</sub> O) <sub>6</sub> ](SeO <sub>4</sub> ) <sub>2</sub> ; space group: P2 <sub>1</sub> /c.                                                                                                                                |
| 51648       | 2.007 + 2.336 Å                                 | Kockelmann, W.; Schaefer, W.; Kirfel, A.; Klapper, H.; Euler, H. <i>Mat. Sci. Forum</i> <b>2001</b> , <i>378</i> , 274; space group: P2 <sub>1</sub> /a.                                                                                                                                                                                                       |
| AMATUF      | 2.007 + 2.248 Å                                 | Bednarchuk, T. J.; Kinzhybalov, V.; Bednarchuk, O.; Pietraszko, A. <i>J. Mol. Struct.</i> <b>2016</b> , <i>1120</i> , 138. (C <sub>5</sub> H <sub>7</sub> N <sub>2</sub> ) <sub>2</sub> [Cu(H <sub>2</sub> O) <sub>6</sub> ](SO <sub>4</sub> ) <sub>2</sub> ; space group: P-1.                                                                                |
| 26331       | 2.011 + 2.238 Å                                 | Monge, A.; Gutierrez-Puebla, E., <i>Acta Crystallogr. Sect. B</i> <b>1981</b> , <i>37</i> , 427. (NH <sub>4</sub> ) <sub>2</sub> [Cu(H <sub>2</sub> O) <sub>6</sub> ](SeO <sub>4</sub> ) <sub>2</sub> ; space group: P2 <sub>1</sub> /c.                                                                                                                       |
| NINVUC      | 2.018 + 2.485 Å                                 | Costantino, F.; Bataille, T.; Audebrand, N.; Le Fur, E.; Sangregorio, C. <i>Cryst. Growth Des.</i> <b>2007</b> , <i>7</i> , 1881. [Cu(H <sub>2</sub> O) <sub>6</sub> ][Cu <sub>2</sub> C <sub>12</sub> H <sub>22</sub> N <sub>2</sub> O <sub>14</sub> P <sub>4</sub> ]·2H <sub>2</sub> O; space group: P2 <sub>1</sub> /n.                                     |
| 23187       | 2.019 + 2.230 Å                                 | Brown, G. M.; Chidambaram, R., <i>Acta Crystallogr. Sect. B</i> <b>1969</b> , <i>25</i> , 676. (NH <sub>4</sub> ) <sub>2</sub> [Cu(H <sub>2</sub> O) <sub>6</sub> ](SO <sub>4</sub> ) <sub>2</sub> ; space group: P2 <sub>1</sub> /a.                                                                                                                          |
| 62992       | 2.020 + 2.216 Å                                 | Maslen, E. N.; Watson, K. J.; Moore, F. H., <i>Acta Crystallogr. Sect. B</i> <b>1988</b> , <i>44</i> , 102. (NH <sub>4</sub> ) <sub>2</sub> [Cu(H <sub>2</sub> O) <sub>6</sub> ](SO <sub>4</sub> ) <sub>2</sub> ; space group: P2 <sub>1</sub> /a.                                                                                                             |
| QEYNAL      | 2.022 + 2.099 Å                                 | Said, S.; Mhadhbi, N.; Hajlaoui, F.; Yahyaoui, S.; Norquist, A. J.; Mhiri, T.; Bataille, T.; Naili, H. <i>Phase Transitions</i> <b>2013</b> , <i>87</i> , 71. (C <sub>5</sub> H <sub>14</sub> N <sub>2</sub> ) <sub>2</sub> [Cu(H <sub>2</sub> O) <sub>6</sub> ](SO <sub>4</sub> ) <sub>3</sub> ; space group: P2 <sub>1</sub> 2 <sub>1</sub> 2 <sub>1</sub> . |
| 62991       | 2.023 + 2.226 Å                                 | Maslen, E. N.; Watson, K. J.; Moore, F. H., <i>Acta Crystallogr. Sect. B</i> <b>1988</b> , <i>44</i> , 102. (NH <sub>4</sub> ) <sub>2</sub> [Cu(H <sub>2</sub> O) <sub>6</sub> ](SO <sub>4</sub> ) <sub>2</sub> ; space group: P2 <sub>1</sub> /a.                                                                                                             |
| 14358       | 2.029 + 2.219 Å                                 | Montgomery, H.; Lingafelter, E. C., <i>Acta Crystallogr.</i> <b>1966</b> , <i>20</i> , 659. (NH <sub>4</sub> ) <sub>2</sub> [Cu(H <sub>2</sub> O) <sub>6</sub> ](SO <sub>4</sub> ) <sub>2</sub> ; space group: P2 <sub>1</sub> /a.                                                                                                                             |
| 18177       | 2.053 + 2.190 Å                                 | Webb, M. W.; Kay, H. F.; Grimes, N. W., <i>Acta Crystallogr.</i> <b>1965</b> , <i>18</i> , 740. (NH <sub>4</sub> ) <sub>2</sub> [Cu(H <sub>2</sub> O) <sub>6</sub> ](SO <sub>4</sub> ) <sub>2</sub> ; space group: P2 <sub>1</sub> /a.                                                                                                                         |
| FECQEK      | 2.055 + 2.166 Å                                 | Li, F.; Delgado, R.; Costa, J.; Drew, M. G. B.; Felix, V. <i>Dalton Trans.</i> <b>2005</b> , 82. [Cu(H <sub>2</sub> O) <sub>6</sub> ][Cu <sub>2</sub> C <sub>20</sub> H <sub>38</sub> N <sub>6</sub> O <sub>4</sub> ](SO <sub>4</sub> ) <sub>3</sub> ·3H <sub>2</sub> O; ; space group: P2 <sub>1</sub> /c.                                                    |
| <b>Mean</b> | <b>1.980 + 2.333 Å/108 structures (2.097 Å)</b> |                                                                                                                                                                                                                                                                                                                                                                |
| <b>Mean</b> | <b>1.981 + 2.333 Å/114 structures (2.097 Å)</b> |                                                                                                                                                                                                                                                                                                                                                                |

*Six-coordination in regular octahedral [Cu(H<sub>2</sub>O)<sub>6</sub>]<sup>2+</sup> complexes*

ICSD/CSD coded  $d(\text{Cu-O})_{\text{eq}} + d(\text{Cu-O})_{\text{ax1}} + d(\text{Cu-O})_{\text{ax2}}$  Reference, compound formula, space group

|        |                             |                                                                                                                                                                                                                                                                                                                                                                                                                                                                                                           |
|--------|-----------------------------|-----------------------------------------------------------------------------------------------------------------------------------------------------------------------------------------------------------------------------------------------------------------------------------------------------------------------------------------------------------------------------------------------------------------------------------------------------------------------------------------------------------|
| OHAYIG | 2.032 Å                     | Ali, M.; Dutta, D.; Biswas, S.; Marek, J.; Jana, A. D. <i>CrystEngComm</i> <b>2009</b> , <i>11</i> , 2608.                                                                                                                                                                                                                                                                                                                                                                                                |
| GINWEG | 2.065 Å                     | [Cu(H <sub>2</sub> O) <sub>6</sub> ][CuC <sub>36</sub> H <sub>24</sub> N <sub>6</sub> ] <sub>2</sub> [Mo <sub>6</sub> Te <sub>6</sub> O <sub>24</sub> ]·27H <sub>2</sub> O; space group: P-3c.<br>Deng, Y.-F.; Zhang, H.-L.; Hong, Q.-M.; Weng, W.-Z.; Wan, H.-L.; Zhou, Z.-H. <i>J. Solid State Chem.</i> <b>2007</b> , <i>180</i> , 3152. (NH <sub>4</sub> ) <sub>2</sub> [Cu(H <sub>2</sub> O) <sub>6</sub> ][TiC <sub>18</sub> H <sub>18</sub> O <sub>21</sub> ]·6H <sub>2</sub> O; space group: P-3. |
| 34760  | 2.074 Å                     | Ray, S.; Zalkin, A.; Templeton, D. H., <i>Acta Crystallogr. Sect. B</i> <b>1973</b> , <i>29</i> , 2748. [Cu(H <sub>2</sub> O) <sub>6</sub> ]SiF <sub>6</sub> ; space group: R-3.                                                                                                                                                                                                                                                                                                                          |
| 71532  | 2.079 Å                     | Blackburn, A. C.; Gallucci, J. C.; Gerkin, R. E., <i>Acta Crystallogr. Sect. C</i> <b>1991</b> , <i>47</i> , 2019.<br>[Cu(H <sub>2</sub> O) <sub>6</sub> ](BrO <sub>3</sub> ) <sub>2</sub> ; space group: Pa-3.                                                                                                                                                                                                                                                                                           |
| 200622 | 2.081 Å                     | Tat'yanina, I. V.; Chernaya, T. S.; Gorchenkova, E. A.; Simonov, V. I.; Spitsyn, V. I., <i>Dokl. Akad. Nauk SSSR</i> , <b>1979</b> , <i>247</i> , 1162. H <sub>6</sub> [Cu(H <sub>2</sub> O) <sub>6</sub> ][UMo <sub>12</sub> O <sub>42</sub> ]·6H <sub>2</sub> O; space group: R-3.                                                                                                                                                                                                                      |
| MAJQOG | 2.104 Å                     | Liang, Z.-Y.; Chen, H.-Y.; Shan, C.-Y.; Zhang, Y.-Q.; Tao, Z. <i>Polyhedron</i> <b>2016</b> , <i>110</i> , 125.<br>[Cu(H <sub>2</sub> O) <sub>6</sub> ][(PrNaC <sub>30</sub> H <sub>36</sub> ClN <sub>20</sub> O <sub>13</sub> )Cl <sub>8</sub> ·19H <sub>2</sub> O]; space group: Pnnm.                                                                                                                                                                                                                  |
| POJLIK | 2.106 Å                     | Zeng, Y.-F.; Hu, X.; Zhao, J.-P.; Hu, B.-W.; Sanudo, E. C.; Li, F.-C.; Bu, X.-H. <i>Chem. Eur. J.</i> <b>2008</b> , <i>14</i> , 7127. [Cu(H <sub>2</sub> O) <sub>6</sub> ][Cu <sub>12</sub> C <sub>48</sub> H <sub>30</sub> N <sub>24</sub> O <sub>30</sub> ]; space group: P-3.                                                                                                                                                                                                                          |
| Mean   | <b>2.077 Å/7 structures</b> |                                                                                                                                                                                                                                                                                                                                                                                                                                                                                                           |

*Six-coordination in [Cu(H<sub>2</sub>O)<sub>6</sub>]<sup>2+</sup> complexes with non-regular octahedral symmetry around copper*

| ICSD/CSD code | <i>d</i> (Cu-O)       | Reference, compound formula, space group                                                                                                                                                                                                                                                                  |
|---------------|-----------------------|-----------------------------------------------------------------------------------------------------------------------------------------------------------------------------------------------------------------------------------------------------------------------------------------------------------|
| 59871         | 1.969, 2.084, 2.202 Å | Li, X.-H.; Xia, F.-Y.; Xiao, H.-P.; Hu, M.-L. <i>Acta Crystallogr., Sect. E</i> <b>2004</b> , <i>60</i> , i32.<br>[Cu(H <sub>2</sub> O) <sub>6</sub> ](ClO <sub>4</sub> ) <sub>2</sub> ·2H <sub>2</sub> O; space group: P2 <sub>1</sub> /c.                                                               |
| 81460         | 1.932, 2.085, 2.260 Å | Rauw, W.; Ahsbahs, H.; Hitchman, M. A.; Lukin, S.; Reinen, D.; Schultz, A. J.; Simmons, C. J.; Stratemeier, H. <i>Inorg. Chem.</i> <b>1996</b> , <i>35</i> , 1902. (ND <sub>4</sub> ) <sub>2</sub> [Cu(D <sub>2</sub> O) <sub>6</sub> ](SO <sub>4</sub> ) <sub>2</sub> ; space group: P2 <sub>1</sub> /a. |
| 189267        | 1.966, 2.086, 2.200 Å | Weil, M. <i>Acta Crystallogr., Sect. C</i> <b>2013</b> , <i>69</i> , 990. (NH <sub>4</sub> ) <sub>2</sub> [Cu(H <sub>2</sub> O) <sub>6</sub> ](SO <sub>4</sub> ) <sub>2</sub> ; space group: P2 <sub>1</sub> /c.                                                                                          |
| 189268        | 1.962, 2.131, 2.177 Å | Weil, M. <i>Acta Crystallogr., Sect. C</i> <b>2013</b> , <i>69</i> , 990. (NH <sub>4</sub> ) <sub>1.176</sub> K <sub>0.824</sub> (Cu[H <sub>2</sub> O) <sub>6</sub> ](SO <sub>4</sub> ) <sub>2</sub> ; space group: P2 <sub>1</sub> /c.                                                                   |
| 240926        | 1.962, 2.130, 2.170 Å | Wu, W.; Xie, J.-M.; Xie, D.-P.; Xuan, Y.-W. <i>Acta Crystallogr., Sect. E</i> <b>2008</b> , <i>64</i> , i7.<br>Na <sub>2</sub> [Cu(H <sub>2</sub> O) <sub>6</sub> ](SO <sub>4</sub> ) <sub>2</sub> ; space group: P2 <sub>1</sub> /c.                                                                     |
| CAMSCU        | 1.967-2.224 Å         | Couldwell, C.; Prout, K.; Robey, D.; Taylor, R.; Rossotti, F. J. C., <i>Acta Crystallogr. Sect. B</i> <b>1978</b> , <i>34</i> , 1491. [Cu(H <sub>2</sub> O) <sub>6</sub> ](C <sub>10</sub> H <sub>15</sub> SO <sub>4</sub> ) <sub>2</sub> ; space group: P2 <sub>1</sub> .                                |
| EGOGAL        | 2.041, 2.053, 2.067 Å | Black, D. T.; Kennedy, A. R.; Lobato, K. M. <i>Acta Crystallogr., Sect. C</i> <b>2019</b> , <i>75</i> , 633.<br>[Cu(H <sub>2</sub> O) <sub>6</sub> ]C <sub>18</sub> H <sub>14</sub> N <sub>2</sub> O <sub>7</sub> S <sub>2</sub> ·(CH <sub>3</sub> ) <sub>2</sub> NHO; space group: I2/m                  |

|        |                       |                                                                                                                                                                                                                                                                                                                                                                      |
|--------|-----------------------|----------------------------------------------------------------------------------------------------------------------------------------------------------------------------------------------------------------------------------------------------------------------------------------------------------------------------------------------------------------------|
| AFEXUG | 2.057, 2.105, 2.120 Å | Martsinko, E. E.; Minacheva, L. K.; Chebanenko, E. A.; Seifullina, I. I.; Sergienko, V. S.; Churakov, A. V. <i>Russ. J. Inorg. Chem.</i> <b>2013</b> , <i>58</i> , 588. [Cu(H <sub>2</sub> O) <sub>6</sub> ][Ge(C <sub>6</sub> H <sub>5</sub> O <sub>7</sub> ) <sub>2</sub> ] $\cdot$ 4H <sub>2</sub> O; space group: P2 <sub>1</sub> /n                             |
| MOLDAU | 2.019, 2.022, 2.076 Å | Mahmudov, K. T.; Kopylovich, M. N.; Fatima M.; Guedes da Silva, C.; Pombeiro, A. J. L. <i>ChemPlusChem</i> <b>2014</b> , <i>79</i> , 1523. [Cu(H <sub>2</sub> O) <sub>6</sub> ](C <sub>11</sub> H <sub>11</sub> N <sub>2</sub> O <sub>5</sub> S) <sub>2</sub> $\cdot$ 4H <sub>2</sub> O; space group: P-1.                                                           |
| PODXIQ | 2.017, 2.045, 2.053 Å | Li, Z. L.; Yao, X. J.; Wu, W.; Xuan, Y. W. <i>Acta Crystallogr., Sect. E</i> <b>2008</b> , <i>64</i> , m1024. [Cu(H <sub>2</sub> O) <sub>6</sub> ]Cl <sub>2</sub> $\cdot$ 2C <sub>6</sub> H <sub>12</sub> N <sub>4</sub> $\cdot$ 4H <sub>2</sub> O; space group: P-1.                                                                                                |
| 162702 | 2.017, 2.045, 2.053 Å | Xuan, Y. W.; Wu, W.; Li, S. <i>Cryst. Res. Technol.</i> <b>2009</b> , <i>44</i> , 127. [Cu(H <sub>2</sub> O) <sub>6</sub> ]Cl <sub>2</sub> $\cdot$ 2C <sub>6</sub> H <sub>12</sub> N <sub>4</sub> $\cdot$ 4H <sub>2</sub> O; space group: P-1.                                                                                                                       |
| ROCFIZ | 2.058, 2.116, 2.149 Å | Bi, J.; Kong, L.; Huang, Z.; Liu, J. <i>Inorg. Chem.</i> <b>2008</b> , <i>47</i> , 4564. [Co <sub>2</sub> C <sub>24</sub> H <sub>20</sub> N <sub>4</sub> O <sub>2</sub> ] <sub>2</sub> [Cu(H <sub>2</sub> O) <sub>6</sub> ](C <sub>9</sub> H <sub>3</sub> O <sub>6</sub> ) <sub>2</sub> $\cdot$ 21.5H <sub>2</sub> O; ; space group: P2 <sub>1</sub> /c.             |
| SOFRIP | 2.023, 2.064, 2.066 Å | Liu, X.-H.; Lu, Q.; Zhang, L.; Shi, L. <i>Z. Kristallogr.-New Cryst. Struct.</i> <b>2008</b> , <i>223</i> , 117. [Cu(H <sub>2</sub> O) <sub>6</sub> ](NO <sub>3</sub> ) <sub>2</sub> $\cdot$ 2C <sub>6</sub> H <sub>12</sub> N <sub>4</sub> $\cdot$ 4H <sub>2</sub> O; space group: P-1.                                                                             |
| WAVVIA | 2.081, 2.114, 2.146 Å | Gong, Y.; Qin, J.-B.; Wu, T.; Li, J.-H.; Yang, L.; Cao, R. <i>Dalton Trans.</i> <b>2012</b> , <i>41</i> , 1961. [Cu(H <sub>2</sub> O) <sub>6</sub> ][Cu(H <sub>2</sub> O) <sub>6</sub> ][Cu <sub>3</sub> C <sub>80</sub> H <sub>56</sub> N <sub>8</sub> O <sub>20</sub> ] $\cdot$ 3.5H <sub>2</sub> O; space group: P2 <sub>1</sub> /n.                              |
| XUXSIT | 2.093, 2.104, 2.112 Å | Delgado, S.; Santana, A.; Castillo, O.; Zamora, F. <i>Dalton Trans.</i> <b>2010</b> , <i>39</i> , 2280. [Cu(H <sub>2</sub> O) <sub>6</sub> ][Cu <sub>3</sub> C <sub>30</sub> H <sub>30</sub> N <sub>6</sub> S <sub>6</sub> ] <sub>2</sub> (SO <sub>4</sub> ) <sub>4</sub> $\cdot$ 4H <sub>2</sub> O; space group: Pbc <sub>a</sub> .                                 |
| FOFKAN | 2*2.104 + 4*2.206 Å   | Qiu, L.-G.; Xie, A.-J.; Zhang, L.-D. <i>Adv. Mater.</i> <b>2005</b> , <i>17</i> , 689. [Cu(H <sub>2</sub> O) <sub>6</sub> ][Mn(H <sub>2</sub> O) <sub>2</sub> (C <sub>12</sub> H <sub>7</sub> N <sub>2</sub> ) <sub>2</sub> ] <sub>2</sub> (C <sub>9</sub> H <sub>3</sub> O <sub>6</sub> ) <sub>2</sub> $\cdot$ 22H <sub>2</sub> O; space group: P2 <sub>1</sub> /c. |
| MAQDOY | 3*2.072 + 3*2.104 Å   | Jia, L.-F.; Fu, W.-F.; Yu, M.-M.; Cao, Q.-Y.; Zhang, J.-F.; Yin, Q. <i>Inorg. Chem. Commun.</i> <b>2005</b> , <i>8</i> , 647. [Cu(H <sub>2</sub> O) <sub>6</sub> ]; space group: P3c.                                                                                                                                                                                |
| 171146 | 2.014-2.084 Å         | Zibaseresht, R.; Hartshorn, R. S. <i>Acta Crystallogr., Sect. E</i> <b>2006</b> , <i>62</i> , i19. [Cu(H <sub>2</sub> O) <sub>6</sub> ](NO <sub>3</sub> ) <sub>2</sub> ; space group: P-1.                                                                                                                                                                           |
| IFICUW | 2.039-2.070 Å         | Zhang, S.-H.; Jiang, Y.-M.; Liu, Z. M. <i>J. Coord. Chem.</i> <b>2008</b> , <i>61</i> , 1927. [Cu(H <sub>2</sub> O) <sub>6</sub> ][Cu <sub>2</sub> C <sub>20</sub> H <sub>20</sub> N <sub>2</sub> O <sub>14</sub> S <sub>2</sub> ] $\cdot$ 6H <sub>2</sub> O; space group: P1.                                                                                       |
| ASEJOA | 2.044-2.124 Å         | Oguntade, B. K.; Hulushe, S. T.; Hosten, E. C.; Watkins, G. M. <i>Z. Kristallogr.-New Cryst. Struct.</i> <b>2021</b> , <i>236</i> , 37. [Cu(H <sub>2</sub> O) <sub>6</sub> ](C <sub>6</sub> H <sub>2</sub> (COOH) <sub>2</sub> (COO) <sub>2</sub> ); space group: I2/a                                                                                               |
| PIVJOU | 2.055-2.293 Å         | Ma, Y.-S.; Wang, T.-W.; Li, Y.-Z.; Zheng, L.-M. <i>Inorg. Chim. Acta</i> <b>2007</b> , <i>360</i> , 4117. [Cu(H <sub>2</sub> O) <sub>6</sub> ][Cu <sub>2</sub> C <sub>10</sub> H <sub>8</sub> Br <sub>2</sub> N <sub>2</sub> O <sub>8</sub> P <sub>2</sub> ] $\cdot$ 2H <sub>2</sub> O; space group: P <sub>c</sub> .                                                |
| YEDZOX | 2.040-2.139 Å         | Zhao, Q.-H.; Du, L.; Fang, R.-B. <i>Acta Crystallogr., Sect. E</i> <b>2006</b> , <i>62</i> , m360. (C <sub>3</sub> H <sub>12</sub> N <sub>2</sub> ) <sub>2</sub> [Cu(H <sub>2</sub> O) <sub>6</sub> ][V <sub>10</sub> O <sub>28</sub> ] $\cdot$ 7H <sub>2</sub> O; space group: P-1.                                                                                 |



*21 structures*

**Table S1ay.** Summary of solid state structures containing hydrated silver(I) ions. The ICSD/CDS code refers to the code in the Inorganic Crystal Structure Database (ICSD, number) and Cambridge Structure Database (CSD, letters), respectively, and the mean Ag-O bond distance,  $d(\text{Ag-O})$ . Data in purple text are not included in the mean distance as they are uncertain or differ significantly from the mean value.

### Silver(I)

#### Two-coordination, linear configuration

| ICSD/CSD code | $d(\text{Ag-O})$            | Reference, compound formula                                                                                                                                                                                                                                          |
|---------------|-----------------------------|----------------------------------------------------------------------------------------------------------------------------------------------------------------------------------------------------------------------------------------------------------------------|
| RUKZUT        | 2.112 Å                     | Wu, H.; Dong, X.-W.; Ma, J.-F.; Liu, H.-Y.; Yang, J.; Bai, H.-Y. <i>Dalton Trans.</i> <b>2009</b> , 3162.<br>[Ag(H <sub>2</sub> O) <sub>2</sub> ][K <sub>5</sub> C <sub>12</sub> H <sub>8</sub> N <sub>2</sub> O <sub>20</sub> S <sub>4</sub> ]                      |
| TUFSAR        | 2.123 Å                     | Jiang, J.-K., Li, G.-M.; Li, X.-X.; Sun J.-N.; Ge-Shuang, J.; Jin, X. CCDC deposition number 1989320, <b>2020</b> . [Ag(H <sub>2</sub> O) <sub>2</sub> ](C <sub>10</sub> H <sub>8</sub> NO <sub>3</sub> S)·H <sub>2</sub> O                                          |
| DELVAR        | 2.128 Å                     | Makhmudova, N. K.; Sharipov, K. T.; Khodashova, T. S.; Porai-Koshits, M. A.; Parpiev, N. A. <i>Proc. Nat. Acad. Sci. USSR</i> <b>1985</b> , 280, 1360-1362. [Ag(H <sub>2</sub> O) <sub>2</sub> ][AgMoC <sub>14</sub> H <sub>10</sub> N <sub>2</sub> O <sub>6</sub> ] |
| YUCMIT        | 2.132 Å                     | Wang, G.-H. Li, Z.-G.; Jia, H.-Q.; Hu, N.-H. Xu, J.-W. <i>Acta Crystallogr., Sect. C</i> <b>2009</b> , 65, m333.<br>[Ag(H <sub>2</sub> O) <sub>2</sub> ][AgCuC <sub>14</sub> H <sub>8</sub> N <sub>2</sub> O <sub>9</sub> ]·3H <sub>2</sub> O                        |
| UFAGEO        | 2.135 Å                     | Li, Y.-J.; Dong, X.-W.; Wu, H. <i>Acta Crystallogr., Sect. E</i> <b>2007</b> , 63, m2230.<br>[Ag(H <sub>2</sub> O) <sub>2</sub> ](C <sub>10</sub> H <sub>8</sub> NO <sub>3</sub> S)·H <sub>2</sub> O                                                                 |
| UFAGEO01      | 2.142 Å                     | Liu, H.-Y.; Wu, H.; Ma, J.-F.; Song, S.-Y.; Yang, J.; Liu, Y.-Y.; Su, Z.-M. <i>Inorg. Chem.</i> <b>2007</b> , 46, 7299.<br>[Ag(H <sub>2</sub> O) <sub>2</sub> ](C <sub>10</sub> H <sub>8</sub> NO <sub>3</sub> S)·H <sub>2</sub> O                                   |
| RUDPOW        | 2.248 Å                     | Liang, Z.; Mak, T. C. W. <i>Inorg. Chem.</i> <b>2009</b> , 48, 6480. [Ag(H <sub>2</sub> O) <sub>2</sub> ][Ag <sub>5</sub> C <sub>25</sub> H <sub>11</sub> F <sub>24</sub> NO <sub>20</sub> ]                                                                         |
| <b>Mean</b>   | <b>2.129 Å/6 structures</b> |                                                                                                                                                                                                                                                                      |

#### Three-coordination, triangular configuration

| ICSD/CSD code | $d(\text{Ag-O})$ | Reference, compound formula                                                                                                                                                                                                                                                                                                                                                                                                                        |
|---------------|------------------|----------------------------------------------------------------------------------------------------------------------------------------------------------------------------------------------------------------------------------------------------------------------------------------------------------------------------------------------------------------------------------------------------------------------------------------------------|
| CUVZOL        | 2.484 Å          | Chen, G.-H.; He, Y.-P.; Wang, F.; Yuan, L.-B.; Xu, H.; Zhang, J. <i>Cryst. Growth Des.</i> <b>2020</b> , 20, 6316. ((CH <sub>3</sub> ) <sub>2</sub> NH <sub>2</sub> ) <sub>3</sub> [Ag(H <sub>2</sub> O) <sub>3</sub> ][Ag <sub>4</sub> C <sub>30</sub> H <sub>70</sub> N <sub>10</sub> ] <sub>3</sub> [Ti <sub>4</sub> C <sub>138</sub> H <sub>72</sub> O <sub>36</sub> ] <sub>2</sub> ·6((CH <sub>3</sub> ) <sub>2</sub> NCHO·6H <sub>2</sub> O) |

**Table S1az.** Summary of solid state structures containing hydrated gold(III) ions. The ICSD/CDS code refers to the code in the Inorganic Crystal Structure Database (ICSD, number) and Cambridge Structure Database (CSD, letters), respectively, and the mean Au-O bond distance,  $d(\text{Au-O})$ . Data in purple text are not included in the mean distance as they are uncertain or differ significantly from the mean value.

### Gold(III)

*Four-coordination, square-planar configuration*

| ICSD/CSD code | $d(\text{Au-O})$           | Reference, compound formula                                                                                                                                                                                                                                                                                                                |
|---------------|----------------------------|--------------------------------------------------------------------------------------------------------------------------------------------------------------------------------------------------------------------------------------------------------------------------------------------------------------------------------------------|
| NUJCUT        | 2.097 Å                    | Lin, R.-L.; Dong, Y.-P.; Tang, M.; Liu, Z.; Tao, Z.; Liu, J.-X. <i>Inorg. Chem.</i> <b>2020</b> , <i>59</i> , 3850.<br>[Au(H <sub>2</sub> O) <sub>4</sub> ] <sub>2</sub> [AuCl <sub>4</sub> ] <sub>6</sub> ·3(C <sub>42</sub> H <sub>42</sub> N <sub>28</sub> O <sub>14</sub> )·2[AuCl <sub>3</sub> (H <sub>2</sub> O)]·30H <sub>2</sub> O |
| <b>Mean</b>   | <b>2.097 Å/1 structure</b> |                                                                                                                                                                                                                                                                                                                                            |

**Table S1ba.** Summary of solid state structures containing hydrated zinc(II) ions. The ICSD/CDS code refers to the code in the Inorganic Crystal Structure Database (ICSD, number) and Cambridge Structure Database (CSD, letters), respectively, and the mean Zn-O bond distance,  $d(\text{Zn-O})$ . Data in purple text are not included in the mean distance as they are uncertain or differ significantly from the mean value.

### Zinc(II)

#### *Four-coordination, tetrahedral configuration*

| ICSD/CSD code | $d(\text{Zn-O})$ | Reference, compound formula                                                                                                                                                                                                                                           |
|---------------|------------------|-----------------------------------------------------------------------------------------------------------------------------------------------------------------------------------------------------------------------------------------------------------------------|
| IBIZOL        | 2.023 Å          | Pan, R.; Yang, B.-B.; Wang, G.-M.; Yang, G.-Y. <i>Inorg. Chem. Commun.</i> <b>2017</b> , 76, 26.<br>[Zn(H <sub>2</sub> O) <sub>4</sub> ][Al <sub>2</sub> B <sub>10</sub> O <sub>20</sub> ] <sub>n</sub>                                                               |
| VAXTEW        | 2.026 Å          | Zhang, L.-P.; Ma, J.-F.; Yang, J.; Pang, Y.-Y.; Ma, J.-C. <i>Inorg. Chem.</i> <b>2010</b> , 49, 1535.<br>[Zn(H <sub>2</sub> O) <sub>4</sub> ](B <sub>6</sub> O <sub>10</sub> ) <sub>n</sub>                                                                           |
| LAJFUB        | 2.089 Å          | Steuber, F. W.; Gough, J. J.; Whelan, E.; Burtnyak, L.; Bradley, A. L.; Schmitt, W. <i>Inorg. Chem.</i> <b>2020</b> , 59, 17244. [Zn(H <sub>2</sub> O) <sub>4</sub> ][Cu <sub>2</sub> ZnC <sub>56</sub> H <sub>43</sub> N <sub>8</sub> O <sub>16</sub> ] <sub>2</sub> |

#### **No structure with a reasonable Zn-O bond distance for four-coordination**

#### *Five-coordination, trigonal bipyramidal configuration*

| ICSD/CSD code | $d(\text{Zn-O})$            | Reference, compound formula                                                                                                                                                                                                                                            |
|---------------|-----------------------------|------------------------------------------------------------------------------------------------------------------------------------------------------------------------------------------------------------------------------------------------------------------------|
| FURWUL        | 2.000 Å                     | Leong, W. L.; Vittal, J. J. <i>Inorg. Chim. Acta</i> <b>2009</b> , 362, 2189. [Zn(H <sub>2</sub> O) <sub>5</sub> ][Zn <sub>2</sub> C <sub>30</sub> H <sub>28</sub> N <sub>2</sub> O <sub>16</sub> ]                                                                    |
| ASACON        | 2.006 Å                     | Zhang, L.-P.; Ma, J.-F.; Yang, J.; Pang, Y.-Y.; Ma, J.-C. <i>Inorg. Chem.</i> <b>2010</b> , 49, 1535.<br>[Zn(H <sub>2</sub> O) <sub>5</sub> ][Zn <sub>4</sub> C <sub>20</sub> H <sub>4</sub> O <sub>18</sub> ] <sub>2</sub> ·2H <sub>2</sub> O                         |
| YUPKAW        | 2.028 Å                     | Fiolka, C.; Striebinger, R.; Walter, T.; Walbaum, C.; Pantenburg, I. Z. <i>Anorg. Allg. Chem.</i> <b>2009</b> , 635, 855. [Zn(H <sub>2</sub> O) <sub>5</sub> ](I <sub>3</sub> ) <sub>2</sub> ·2C <sub>12</sub> H <sub>24</sub> O <sub>6</sub>                          |
| DEHFUR01      | 2.032 Å                     | Malinska, M.; Gorna, M.; Merski, M. CCDC deposition number 1964322, <b>2020</b> .<br>[Zn(H <sub>2</sub> O) <sub>5</sub> ][Zn <sub>2</sub> C <sub>18</sub> H <sub>24</sub> O <sub>12</sub> P <sub>2</sub> ] <sub>7</sub> ·7H <sub>2</sub> O                             |
| DEHFUR        | 2.047 Å                     | Podlahova, J.; Kratochvil, B.; Podlaha, J.; Hasek, J. <i>J. Chem. Soc., Dalton Trans.</i> <b>1985</b> , 2393.<br>[Zn(H <sub>2</sub> O) <sub>5</sub> ][Zn <sub>2</sub> C <sub>18</sub> H <sub>24</sub> O <sub>12</sub> P <sub>2</sub> ] <sub>7</sub> ·7H <sub>2</sub> O |
| <b>Mean</b>   | <b>2.017 Å/4 structures</b> |                                                                                                                                                                                                                                                                        |

Six-coordination, octahedral configuration

| ICSD/CSD code | $d(\text{Zn-O})$ | Reference, compound formula                                                                                                                                                                                                                                                                                           |
|---------------|------------------|-----------------------------------------------------------------------------------------------------------------------------------------------------------------------------------------------------------------------------------------------------------------------------------------------------------------------|
| YOGQUG        | 2.039 Å          | Li, J.-T.; Cao, D.-K.; Liu, B.; Li, Y.-Z.; Zheng, L.-M. <i>Cryst. Growth Des.</i> <b>2008</b> , <i>8</i> , 2950. $[\text{Zn}(\text{H}_2\text{O})_6][\text{Zn}_8\text{C}_{52}\text{H}_{32}\text{N}_2\text{O}_{30}\text{P}_6]$                                                                                          |
| YEVLER        | 2.045 Å          | Zhao; M.; Wang; Z.-B.; Li; Y.-Z.; Chen, H.-L. <i>Inorg. Chem. Commun.</i> <b>2007</b> , <i>10</i> , 101. $[\text{Zn}(\text{H}_2\text{O})_6]\text{Cl}_2 \cdot 3(\text{C}_3\text{H}_6\text{N}_2\text{O}_2) \cdot 3(\text{C}_8\text{H}_{16}\text{N}_4) \cdot 14\text{H}_2\text{O}$                                       |
| POFDAQ        | 2.045 Å          | Yao, X. J.; Xuan, Y. W.; Wu, W. <i>Acta Crystallogr., Sect. E</i> <b>2008</b> , <i>64</i> , m1132. $[\text{Zn}(\text{H}_2\text{O})_6]\text{Cl}_2 \cdot 2\text{C}_6\text{H}_{12}\text{N}_4 \cdot 4\text{H}_2\text{O}$                                                                                                  |
| CITDAK02      | 2.046 Å          | Baruah, J. B. CCDC deposition number 749999, <b>2016</b> . $[\text{Zn}(\text{H}_2\text{O})_6](p\text{-OOC-C}_5\text{H}_5\text{NO})_2$                                                                                                                                                                                 |
| ORIMUY        | 2.053 Å          | Wei, M.-L.; Zhuang, P.-F.; Miao, Q.-X.; Wang, Y. <i>J. Solid State Chem.</i> <b>2011</b> , <i>184</i> , 1472. $[\text{Zn}(\text{H}_2\text{O})_6][\text{HMO}_{12}\text{O}_{40}\text{P}](4\text{-HOOC-C}_5\text{H}_5\text{NO})_2 \cdot 4\text{H}_2\text{O}$                                                             |
| 64614         | 2.060 Å          | Duhlev, R.; Brown, I. D.; Faggiani, R. <i>Acta Crystallogr., Sect. C</i> <b>1988</b> , <i>44</i> , 1696. $[\text{Zn}(\text{H}_2\text{O})_6][\text{Zn}_2\text{Br}_6]$                                                                                                                                                  |
| KAXLIF        | 2.060 Å          | Wang; X.-B.; Zhang; Z.-T.; Wang, Q.-Y. <i>Struct. Chem.</i> <b>2005</b> , <i>16</i> , 461. $[\text{Zn}(\text{H}_2\text{O})_6](\text{C}_{16}\text{H}_{11}\text{O}_7\text{S})_2 \cdot 10\text{H}_2\text{O}$                                                                                                             |
| DIWPUX        | 2.063 Å          | Zhang, X.-D.; Zhao, Y.; Chen, K.; Guo, J.-H.; Wang, P.; Wu, H.; Sun, W. Y. <i>Sens. Actuators B</i> <b>2019</b> , <i>282</i> , 844. $(\text{NH}_4)_2[\text{Zn}(\text{H}_2\text{O})_6][\text{Mg}_4\text{C}_{84}\text{H}_{60}\text{O}_{32}] \cdot 6\text{C}_3\text{H}_6\text{N}_2\text{O}_2 \cdot 66\text{H}_2\text{O}$ |
| YASHIK        | 2.065 Å          | Zhang; X.-L.; Lu; Y.-J.; Li; J.-Z.; Ng, S. W. <i>Acta Crystallogr., Sect. E</i> <b>2005</b> , <i>61</i> , m1063. $[\text{Zn}(\text{H}_2\text{O})_6](\text{C}_6\text{H}_4\text{NO}_3)_2$                                                                                                                               |
| TITNIU        | 2.066 Å          | Tai, X.-S.; Yin, J.; Hao, M.-Y. <i>Acta Crystallogr., Sect. E</i> <b>2008</b> , <i>64</i> , m273. $[\text{Zn}(\text{H}_2\text{O})_6](\text{C}_{13}\text{H}_{10}\text{NO}_4\text{S})_2$                                                                                                                                |
| BENBIG        | 2.067 Å          | Nguyen-Trung; C.; Bryan, J. C.; Palmer, D.A. <i>Struct. Chem.</i> <b>2004</b> , <i>15</i> , 89. $[\text{Zn}(\text{H}_2\text{O})_6](\text{CF}_3\text{SO}_3)_2$                                                                                                                                                         |
| KERNAX        | 2.067 Å          | Li, B.; Ye; L.; Hou; G.-F.; Yang; G.-D.; Wu, L.-X. <i>Acta Crystallogr., Sect. E</i> <b>2006</b> , <i>62</i> , m2932. $[\text{Zn}(\text{H}_2\text{O})_6][\text{ZnC}_{12}\text{H}_8\text{Cl}_4\text{N}_2\text{O}_4](\text{C}_{16}\text{H}_{11}\text{O}_7\text{S})_2 \cdot 2\text{H}_2\text{O}$                         |
| YASHIK02      | 2.067 Å          | Segla, P.; Moncol, J. CCDC deposition number 2009719, <b>2020</b> . $[\text{Zn}(\text{H}_2\text{O})_6](\text{C}_6\text{H}_4\text{NO}_3)_2$                                                                                                                                                                            |
| QUXPUV        | 2.068 Å          | Yang, G.-F.; Zhao, Y.-H. <i>Acta Crystallogr., Sect. E</i> <b>2010</b> , <i>66</i> , m804. $[\text{Zn}(\text{H}_2\text{O})_6](2,4,5\text{-(HOOC)}_3\text{C}_6\text{H}_2\text{-COO})_2 \cdot 2\text{C}_{11}\text{H}_6\text{N}_2\text{O} \cdot 2\text{H}_2\text{O}$                                                     |
| PEGMET        | 2.068 Å          | Auerbach, U.; Stockheim, C.; Weyhermuller, T.; Wieghardt, K.; Nuber, B. <i>Angew. Chem., Int. Ed.</i> <b>1993</b> , <i>32</i> , 714. $[\text{Zn}(\text{H}_2\text{O})_6](\text{C}_{24}\text{H}_{20}\text{B})_2 \cdot [\text{FeC}_{39}\text{H}_{54}\text{N}_3\text{O}_3]_2 \cdot 4\text{CH}_3\text{COCH}_3$             |
| YASHIK01      | 2.068 Å          | Song; Y.-S.; Yan; B.; Chen, Z.-X. <i>Inorg. Chem. Commun.</i> <b>2005</b> , <i>8</i> , 1165. $[\text{Zn}(\text{H}_2\text{O})_6](\text{C}_6\text{H}_4\text{NO}_3)_2$                                                                                                                                                   |
| 161155        | 2.069 Å          | Polovinko, I. I.; Rykhlyuk, S. V.; Davydov, V. M. <i>Ukrains'kii Fiz. Zh.</i> <b>2007</b> , <i>52</i> , 671. $\text{K}_2[\text{Zn}(\text{H}_2\text{O})_6](\text{SO}_4)_2$                                                                                                                                             |
| 418436        | 2.069 Å          | Tiritiris, I.; Schleid, T. <i>Z. Anorg. Allg. Chem.</i> <b>2008</b> , <i>634</i> , 317. $[\text{Zn}(\text{H}_2\text{O})_6]\text{B}_{12}\text{H}_{12} \cdot 6\text{H}_2\text{O}$                                                                                                                                       |
| ZNAQBS02      | 2.069 Å          | Assoumatine, T.; Stoeckli-Evans, H. CCDC deposition number 1980074, <b>2020</b> . $[\text{Zn}(\text{H}_2\text{O})_6](\text{C}_6\text{H}_5\text{SO}_3)_2$                                                                                                                                                              |
| AQAFIK        | 2.070 Å          | Isbjakowa, A. S.; Chernyshev, V. V.; Tafeenko, V. A.; Shiryaev, A. A.; Kudryavtsev, I. K.; Aslanov, L. A. <i>Struct. Chem.</i> <b>2021</b> , <i>32</i> , 719. $[\text{Zn}(\text{H}_2\text{O})_6](\text{C}_6\text{H}_2\text{N}_7\text{O}_3)_2 \cdot 2\text{H}_2\text{O}$                                               |

|          |         |                                                                                                                                                                                                                                                                                                                                                                                                                       |
|----------|---------|-----------------------------------------------------------------------------------------------------------------------------------------------------------------------------------------------------------------------------------------------------------------------------------------------------------------------------------------------------------------------------------------------------------------------|
| DISJIY   | 2.070 Å | Zviedre, I. I.; Bel'skii, V.K.; Mardanenko <i>Latv. PSR Zinat. Akad. Vestis, Khim.Ser.</i> <b>1985</b> , 387.<br>[Zn(H <sub>2</sub> O) <sub>6</sub> ](C <sub>14</sub> H <sub>8</sub> BO <sub>6</sub> ) <sub>2</sub> ·4H <sub>2</sub> O                                                                                                                                                                                |
| 411337   | 2.071 Å | Adamczyk, B.; Troyanov, S. I.; Schneider, M.; Kemnitz, E. <i>Z. Anorg. Allg. Chem.</i> <b>2000</b> , 626, 2543.<br>NH <sub>4</sub> [Zn(H <sub>2</sub> O) <sub>6</sub> ][AlF <sub>5</sub> (H <sub>2</sub> O)]                                                                                                                                                                                                          |
| FIHVUQ   | 2.071 Å | Basdouri, Z.; Trojette, B.; Falvello, L. R.; Graia, M.; Tomas, M. <i>J. Mol. Struct.</i> <b>2019</b> , 1176, 165.<br>[Zn(H <sub>2</sub> O) <sub>6</sub> ][ZnCl <sub>3</sub> (NC <sub>6</sub> H <sub>12</sub> N <sub>3</sub> ) <sub>2</sub> ]·0.5H <sub>2</sub> O                                                                                                                                                      |
| EGOGEP   | 2.072 Å | Black, D. T.; Kennedy, A. R.; Lobato, K. M. <i>Acta Crystallogr., Sect. C</i> <b>2019</b> , 75, 633.<br>[Zn(H <sub>2</sub> O) <sub>6</sub> ](C <sub>18</sub> H <sub>14</sub> N <sub>2</sub> O <sub>7</sub> S <sub>2</sub> )·(CH <sub>3</sub> ) <sub>2</sub> NCHO                                                                                                                                                      |
| EGUPAZ   | 2.072 Å | Tang, S.-F.; Li, L.-J.; Lv, X.-X.; Wang, C.; Zhao, X.-B. <i>CrystEngComm</i> <b>2014</b> , 16, 7043. [Zn(H <sub>2</sub> O) <sub>6</sub> ](2,5-(CH <sub>3</sub> ) <sub>2</sub> -1-(PO <sub>2</sub> (OH))-4-(PO(OH) <sub>2</sub> )-C <sub>6</sub> H <sub>2</sub> ) <sub>2</sub> ·2H <sub>2</sub> O                                                                                                                      |
| VONDEJ   | 2.072 Å | Gagnon, K. J.; Teat, S. J.; Beal, Z. J.; Embry, A. M.; Strayer, M. E.; Clearfield, A. <i>Cryst. Growth Des.</i> <b>2014</b> , 14, 3612. [Zn(H <sub>2</sub> O) <sub>6</sub> ][Zn <sub>4</sub> C <sub>12</sub> H <sub>26</sub> O <sub>18</sub> P <sub>6</sub> ]·2H <sub>2</sub> O                                                                                                                                       |
| KETXAI   | 2.073 Å | Su, D.; Guo, C.-Y.; Willett, R. D.; Scott, B.; Kirchmeier, R. L.; Shreeve, J. M. <i>J. Am. Chem. Soc.</i> <b>1990</b> , 112, 3152. [Zn(H <sub>2</sub> O) <sub>6</sub> ](C <sub>2</sub> H <sub>2</sub> F <sub>2</sub> O <sub>6</sub> P <sub>2</sub> )·H <sub>2</sub> O                                                                                                                                                 |
| 411337   | 2.074 Å | Adamczyk, B.; Troyanov, S.I.; Schneider, M.; Kemnitz, E. <i>Z. Anorg. Allg. Chem.</i> <b>2000</b> , 626, 2543.<br>[Zn(H <sub>2</sub> O) <sub>6</sub> ][ZnF <sub>5</sub> (H <sub>2</sub> O)]                                                                                                                                                                                                                           |
| CITDAK   | 2.074 Å | Knuuttila, P. <i>Polyhedron</i> <b>1984</b> , 3, 303. [Zn(H <sub>2</sub> O) <sub>6</sub> ](p-COO-C <sub>5</sub> H <sub>5</sub> NO) <sub>2</sub>                                                                                                                                                                                                                                                                       |
| ROKSUG01 | 2.074 Å | Shankar, R.; Singh, R.; Mendiratta, S.; Jassal, A. K.; Kociok-Kohn, G.; Molloy, K. C. <i>Eur. J. Inorg. Chem.</i> <b>2017</b> , 2081. [Zn(H <sub>2</sub> O) <sub>6</sub> ](C <sub>2</sub> H <sub>5</sub> SO <sub>3</sub> ) <sub>2</sub>                                                                                                                                                                               |
| ZIDNUY   | 2.074 Å | Belova, E. V.; Krasnov, V. S.; Ilyukhin, A. B.; Uspenskaya, I. A. <i>Thermochim. Acta</i> <b>2018</b> , 668, 46.<br>[Zn(H <sub>2</sub> O) <sub>6</sub> ](CH <sub>3</sub> SO <sub>3</sub> ) <sub>2</sub> ·6H <sub>2</sub> O                                                                                                                                                                                            |
| BENBIG01 | 2.075 Å | Johnston, D. H.; Tinapple, E. L. CCDC deposition number 1878807, <b>2018</b> . [Zn(H <sub>2</sub> O) <sub>6</sub> ](CF <sub>3</sub> SO <sub>3</sub> ) <sub>2</sub>                                                                                                                                                                                                                                                    |
| CITDAK01 | 2.075 Å | Marandi, F.; Hashemi, L.; Morsali, A.; Krautscheid, H. <i>Ultrason. Sonochem.</i> <b>2016</b> , 33, 86.<br>[Zn(H <sub>2</sub> O) <sub>6</sub> ](p-COO-C <sub>5</sub> H <sub>5</sub> NO) <sub>2</sub>                                                                                                                                                                                                                  |
| ETUMEM   | 2.075 Å | Liu, S.-Y.; Tian, L. <i>Acta Crystallogr., Sect. E</i> <b>2011</b> , 67, m950. [Zn(H <sub>2</sub> O) <sub>6</sub> ][ZnC <sub>26</sub> H <sub>18</sub> N <sub>12</sub> O <sub>14</sub> S <sub>2</sub> ]·3H <sub>2</sub> O                                                                                                                                                                                              |
| GIYDEY   | 2.075 Å | Custelcean, R.; Remy, P.; Bonnesen, P. V.; Jiang, D.-E.; Moyer, B. A. <i>Angew. Chem., Int. Ed.</i> <b>2008</b> , 47, 1866. [Zn(H <sub>2</sub> O) <sub>6</sub> ]SO <sub>4</sub> ·2N(C <sub>8</sub> H <sub>10</sub> N <sub>3</sub> O) <sub>3</sub>                                                                                                                                                                     |
| IDOLAR   | 2.075 Å | Igoa, F.; Martinez, S.; Zanoni, K. P. S.; Castiglioni, J.; Suescun, L.; Gonzalez-Platas, J.; de Camargo, A. S. S.; Kremer, C.; Torres, J. <i>CrystEngComm</i> <b>2018</b> , 20, 4942. [Zn(H <sub>2</sub> O) <sub>6</sub> ][HoZn(C <sub>4</sub> H <sub>4</sub> O <sub>5</sub> ) <sub>3</sub> ]·2H <sub>2</sub> O                                                                                                       |
| JINCUF   | 2.076 Å | Dinoi, C.; Sozen, P.; Taban, G.; Demir, D.; Demirhan, F.; Prikhodchenko, P.; Gun, J.; Lev, O.; Daran, J.-C.; Poli, R. <i>Eur. J. Inorg. Chem.</i> <b>2007</b> , 4306.<br>[Zn(H <sub>2</sub> O) <sub>6</sub> ][W <sub>3</sub> (C <sub>5</sub> H <sub>5</sub> ) <sub>3</sub> (C <sub>15</sub> H <sub>30</sub> O <sub>6</sub> ) <sub>2</sub> ](CF <sub>3</sub> COO) <sub>4</sub> ·CF <sub>3</sub> COOH·4H <sub>2</sub> O |

|          |         |                                                                                                                                                                                                                                                                                                                                       |
|----------|---------|---------------------------------------------------------------------------------------------------------------------------------------------------------------------------------------------------------------------------------------------------------------------------------------------------------------------------------------|
| 760212   | 2.077 Å | Lacroix, M. R.; Bukovsky, E. V.; Lozinšek, M.; Folsom, T. C.; Newell, B. S.; Liu, Y.; Peryshkov, D. V.; Strauss, S. H. <i>Inorg. Chem.</i> <b>2018</b> , <i>57</i> , 14983. [Zn(H <sub>2</sub> O) <sub>6</sub> ]B <sub>12</sub> F <sub>12</sub>                                                                                       |
| GIYDEY01 | 2.077 Å | Wu, B.; Liang, J.; Yang, J.; Jia, C.; Yang, X.-J.; Zhang, H.; Tang, N.; Janiak, C. <i>Chem. Commun</i> <b>2008</b> , 1762. [Zn(H <sub>2</sub> O) <sub>6</sub> ]SO <sub>4</sub> ·2N(C <sub>8</sub> H <sub>10</sub> N <sub>3</sub> O) <sub>3</sub>                                                                                      |
| IDOLIZ   | 2.077 Å | Igoa, F.; Martinez, S.; Zanoni, K. P. S.; Castiglioni, J.; Suescun, L.; Gonzalez-Platas, J.; de Camargo, A. S. S.; Kremer, C.; Torres, J. <i>CrystEngComm</i> <b>2018</b> , <i>20</i> , 4942. [Zn(H <sub>2</sub> O) <sub>6</sub> ][DyZn(C <sub>4</sub> H <sub>4</sub> O <sub>5</sub> ) <sub>3</sub> ] <sub>2</sub> ·3H <sub>2</sub> O |
| JEJTIC   | 2.077 Å | Zun-Ting Zhang; Qiu-Ya Wang <i>Heterocycles</i> <b>2005</b> , <i>65</i> , 1947. [Zn(H <sub>2</sub> O) <sub>6</sub> ](C <sub>19</sub> H <sub>17</sub> O <sub>7</sub> S) <sub>2</sub> ·8H <sub>2</sub> O                                                                                                                                |
| OROFOS   | 2.077 Å | Brady, M.; Piombo, S. D.; Hu, C.; Buccella, D. <i>Dalton Trans.</i> <b>2016</b> , <i>45</i> , 12458. [Zn(H <sub>2</sub> O) <sub>6</sub> ][Zn <sub>2</sub> C <sub>24</sub> H <sub>20</sub> N <sub>2</sub> O <sub>14</sub> ]·C <sub>4</sub> H <sub>8</sub> O <sub>2</sub> ·6H <sub>2</sub> O                                            |
| VAFKAP   | 2.077 Å | Dalrymple, S. A.; Parvez, M.; Shimizu, G. K. H. <i>Inorg. Chem.</i> <b>2002</b> , <i>41</i> , 6986. [Zn(H <sub>2</sub> O) <sub>6</sub> ] <sub>3</sub> (C <sub>9</sub> H <sub>9</sub> O <sub>9</sub> S <sub>3</sub> ) <sub>2</sub>                                                                                                     |
| VONDOT   | 2.077 Å | Gagnon, K. J.; Teat, S. J.; Beal, Z. J.; Embry, A. M.; Strayer, M. E.; Clearfield, A. <i>Cryst. Growth Des.</i> <b>2014</b> , <i>14</i> , 3612. [Zn(H <sub>2</sub> O) <sub>6</sub> ][Zn <sub>4</sub> C <sub>18</sub> H <sub>38</sub> O <sub>18</sub> P <sub>6</sub> ]·CH <sub>3</sub> COOH·2H <sub>2</sub> O                          |
| VUNFAN   | 2.077 Å | Ding, R.; Wei, T.; Wang, Q.-Y.; Wang, T.; Zhang, Z.-T. <i>Z. Anorg. Allg. Chem.</i> <b>2015</b> , <i>641</i> , 1130. [Zn(H <sub>2</sub> O) <sub>6</sub> ](C <sub>16</sub> H <sub>11</sub> O <sub>7</sub> S) <sub>2</sub> ·2H <sub>2</sub> O                                                                                           |
| YAPWET   | 2.077 Å | Fujiwara, Y.; Dixon, J. A.; Rodriguez, R. A.; Baxter, R. D.; Dixon, D. D.; Collins, M. R.; Blackmond, D. G.; Baran, P. S. <i>J. Am. Chem. Soc.</i> <b>2012</b> , <i>134</i> , 1494. [Zn(H <sub>2</sub> O) <sub>6</sub> ][Zn <sub>2</sub> (O <sub>2</sub> SCF <sub>2</sub> H) <sub>6</sub> ]                                           |
| YIRWOO   | 2.077 Å | Lacroix, M. R.; Bukovsky, E. V.; Lozinsek, M.; Folsom, T. C.; Newell, B. S.; Liu, Y.; Peryshkov, D. V.; Strauss, S. H. <i>Inorg. Chem.</i> <b>2018</b> , <i>57</i> , 14983. [Zn(H <sub>2</sub> O) <sub>6</sub> ]B <sub>12</sub> H <sub>12</sub>                                                                                       |
| ZNATOS01 | 2.077 Å | Fewings, K. R.; Junk, P. J.; Georganopoulou, D.; Prince, P. D.; Steed, J. W. <i>Polyhedron</i> <b>2001</b> , <i>20</i> , 643. [Zn(H <sub>2</sub> O) <sub>6</sub> ](p-CH <sub>3</sub> C <sub>6</sub> H <sub>4</sub> SO <sub>3</sub> ) <sub>2</sub>                                                                                     |
| 1836     | 2.078 Å | Black, W. H.; Griffith, E. A. H.; Robertson, B. E. <i>Acta Crystallogr., Sect. B</i> <b>1975</b> , <i>31</i> , 615. [Zn(H <sub>2</sub> O) <sub>6</sub> ]S <sub>2</sub> O <sub>6</sub>                                                                                                                                                 |
| 34757    | 2.078 Å | Ray, S. Zalkin, A.; Templeton, D. H. <i>Acta Crystallogr., Sect. B</i> <b>1973</b> , <i>29</i> , 2741. [Zn(H <sub>2</sub> O) <sub>6</sub> ]SiF <sub>6</sub>                                                                                                                                                                           |
| FETLOG   | 2.078 Å | Lu, J. J.; Shi, J. M. <i>Acta Crystallogr., Sect. E</i> <b>2005</b> , <i>61</i> , m327. [Zn(H <sub>2</sub> O) <sub>6</sub> ](ClO <sub>4</sub> ) <sub>2</sub> ·2C <sub>6</sub> H <sub>8</sub> N <sub>2</sub> O <sub>2</sub>                                                                                                            |
| HEKHIO   | 2.078 Å | Steed, J. W.; McCool, B. J.; Junk, P. C. <i>J. Chem. Soc., Dalton Trans.</i> <b>1998</b> , 3417. [Zn(H <sub>2</sub> O) <sub>6</sub> ](ClO <sub>4</sub> ) <sub>2</sub> ·C <sub>12</sub> H <sub>24</sub> O <sub>6</sub>                                                                                                                 |
| SUDGUW   | 2.078 Å | Amanchi, S. R.; Das, S. K. <i>Front. Chem.</i> <b>2018</b> , <i>6</i> , 469. [Zn(H <sub>2</sub> O) <sub>6</sub> ](4-NH <sub>2</sub> -C <sub>5</sub> H <sub>5</sub> N) <sub>10</sub> [V <sub>10</sub> O <sub>28</sub> ] <sub>2</sub> ·10H <sub>2</sub> O                                                                               |
| WIHPAF   | 2.078 Å | Schepke, M.; Edelman, F. T.; Blaurock, S. <i>Acta Crystallogr., Sect. E</i> <b>2007</b> , <i>63</i> , m2071. [Zn(H <sub>2</sub> O) <sub>6</sub> ](C <sub>10</sub> H <sub>15</sub> O <sub>14</sub> S) <sub>2</sub>                                                                                                                     |
| 262616   | 2.079 Å | Donakowski, M. D.; Gautier, R.; Jeongho, Y.; Moore, D. T.; Nino, J. C.; Shiv Halasyamani, P.; Poeppelmeier, K. R. <i>J. Am. Chem. Soc.</i> <b>2012</b> , <i>134</i> , 7679. [Zn(H <sub>2</sub> O) <sub>6</sub> ][VOF <sub>4</sub> (H <sub>2</sub> O)]                                                                                 |
| DIKRIZ01 | 2.079 Å | Wu, B.-D.; Zhang, T.-L.; Li, Y.-L.; Wang, S.-W.; Zhou, Z.-N.; Zhang, J.-G.; Yang, L. <i>Z. Anorg. Allg. Chem.</i> <b>2013</b> , <i>639</i> , 2209. [Zn(H <sub>2</sub> O) <sub>6</sub> ](2,4,6-(NO <sub>2</sub> ) <sub>3</sub> C <sub>6</sub> H <sub>2</sub> -O) <sub>2</sub> ·3H <sub>2</sub> O                                       |

|          |         |                                                                                                                                                                                                                                                                                                                                                                                    |
|----------|---------|------------------------------------------------------------------------------------------------------------------------------------------------------------------------------------------------------------------------------------------------------------------------------------------------------------------------------------------------------------------------------------|
| GUBLAR01 | 2.079 Å | Kruszynski, R.; Sieranski, T.; Swiatkowski, M.; Zielak, M.; Wojciechowski, J.; Dzierzawski, M.; Lewinski, B. <i>J. Coord. Chem.</i> <b>2014</b> , <i>67</i> , 1332. [Zn(H <sub>2</sub> O) <sub>6</sub> ](NO <sub>3</sub> ) <sub>2</sub> ·2C <sub>6</sub> H <sub>12</sub> N <sub>4</sub> ·4H <sub>2</sub> O                                                                         |
| IDOLOF   | 2.079 Å | Igoa, F.; Martinez, S.; Zanoni, K. P. S.; Castiglioni, J.; Suescun, L.; Gonzalez-Platas, J.; de Camargo, A. S. S.; Kremer, C.; Torres, J. <i>CrystEngComm</i> <b>2018</b> , <i>20</i> , 4942. [Zn(H <sub>2</sub> O) <sub>6</sub> ][YZn(C <sub>4</sub> H <sub>4</sub> O <sub>5</sub> ) <sub>3</sub> ] <sub>2</sub> ·2H <sub>2</sub> O                                               |
| IDOMAS   | 2.079 Å | Igoa, F.; Martinez, S.; Zanoni, K. P. S.; Castiglioni, J.; Suescun, L.; Gonzalez-Platas, J.; de Camargo, A. S. S.; Kremer, C.; Torres, J. <i>CrystEngComm</i> <b>2018</b> , <i>20</i> , 4942. [Zn(H <sub>2</sub> O) <sub>6</sub> ][YbZn(C <sub>4</sub> H <sub>4</sub> O <sub>5</sub> ) <sub>3</sub> ] <sub>2</sub> ·2H <sub>2</sub> O                                              |
| UDAFAI   | 2.079 Å | Basa, P. N.; Bhowmick, A.; Schulz, M. M.; Sykes, A. G. <i>J. Org. Chem.</i> <b>2011</b> , <i>76</i> , 7866. [Zn(H <sub>2</sub> O) <sub>6</sub> ](NO <sub>3</sub> ) <sub>2</sub> ·2C <sub>26</sub> H <sub>28</sub> N <sub>2</sub> O <sub>8</sub> ·2CH <sub>3</sub> OH                                                                                                               |
| VOJXUQ   | 2.079 Å | Song, J. H.; Kim, D. W.; Kang, D. W.; Lee, W. R.; Hong, C. S. <i>Chem. Commun.</i> <b>2019</b> , <i>55</i> , 9713. [Zn(H <sub>2</sub> O) <sub>6</sub> ](3-HOOC-4-OH-C <sub>6</sub> H <sub>3</sub> -SO <sub>3</sub> ) <sub>2</sub> ·2H <sub>2</sub> O                                                                                                                               |
| YIVTAZ   | 2.079 Å | Wang, Y.-C.; Zhang, Z.-T.; Chang, Y. <i>Struct. Chem.</i> <b>2007</b> , <i>18</i> , 951. [Zn(H <sub>2</sub> O) <sub>6</sub> ](C <sub>16</sub> H <sub>11</sub> O <sub>9</sub> S) <sub>2</sub> ·4H <sub>2</sub> O                                                                                                                                                                    |
| 194893   | 2.080 Å | Wilcox, R. J.; Losey, B. P.; Folmer, J. C. W.; Martin, J. D.; Zeller, M.; Sommer, R. <i>Inorg. Chem.</i> <b>2015</b> , <i>54</i> , 1109. [Zn(H <sub>2</sub> O) <sub>6</sub> ][ZnCl <sub>4</sub> ]                                                                                                                                                                                  |
| 417920   | 2.080 Å | Graia, M.; Ksiksi, R.; Driss, A. <i>J. Chem. Crystallogr.</i> <b>2008</b> , <i>38</i> , 855. [Zn(H <sub>2</sub> O) <sub>6</sub> ][Zn <sub>2</sub> V <sub>10</sub> O <sub>28</sub> (H <sub>2</sub> O) <sub>10</sub> ]·6H <sub>2</sub> O                                                                                                                                             |
| AXEJEV   | 2.080 Å | Zhao, G. Liu, J. <i>RSC Adv.</i> <b>2021</b> , <i>11</i> , 24500. [Zn(H <sub>2</sub> O) <sub>6</sub> ](p-C <sub>6</sub> H <sub>4</sub> (COO) <sub>2</sub> )·C <sub>14</sub> H <sub>12</sub> N <sub>2</sub> O <sub>4</sub> ·3H <sub>2</sub> O                                                                                                                                       |
| MELQIE   | 2.080 Å | Zhang; Z.-T.; Wang, Q.-Y. <i>J. Chem. Cryst.</i> <b>2005</b> , <i>35</i> , 989. [Zn(H <sub>2</sub> O) <sub>6</sub> ](C <sub>17</sub> H <sub>13</sub> O <sub>7</sub> S) <sub>2</sub> ·8H <sub>2</sub> O                                                                                                                                                                             |
| NAYQUA   | 2.080 Å | Martsinko, E. E.; Seifullina, I. I.; Sergienko, V. S.; Churakov, A. V. <i>Zh. Neorg. Khim.</i> <b>2005</b> , <i>50</i> , 953. [Zn(H <sub>2</sub> O) <sub>6</sub> ][ZnC <sub>6</sub> H <sub>22</sub> Ge <sub>3</sub> O <sub>28</sub> P <sub>6</sub> ]·9H <sub>2</sub> O                                                                                                             |
| TOKCAY   | 2.080 Å | Chagas, L. H.; Janczak, J.; Gomes, F. S.; Fernandes, N. G.; de Oliveira, L. F. C.; Diniz, R. <i>J. Mol. Struct.</i> <b>2008</b> , <i>892</i> , 305. [Zn(H <sub>2</sub> O) <sub>6</sub> ](m-HOOC-C <sub>6</sub> H <sub>4</sub> -SO <sub>3</sub> ) <sub>2</sub>                                                                                                                      |
| UGURET   | 2.080 Å | Sun; Y.-Q.; Zhang; J.; Yang, G.-Y.; <i>Acta Crystallogr., Sect. E</i> <b>2002</b> , <i>58</i> , m548. [Zn(H <sub>2</sub> O) <sub>6</sub> ]C <sub>10</sub> H <sub>4</sub> O <sub>8</sub>                                                                                                                                                                                            |
| VONDIN   | 2.080 Å | Gagnon, K. J.; Teat, S. J.; Beal, Z. J.; Embry, A. M.; Strayer, M. E.; Clearfield, A. <i>Cryst. Growth Des.</i> <b>2014</b> , <i>14</i> , 3612. [Zn(H <sub>2</sub> O) <sub>6</sub> ][Zn <sub>4</sub> C <sub>15</sub> H <sub>32</sub> O <sub>18</sub> P <sub>6</sub> ]CH <sub>3</sub> COOH·2H <sub>2</sub> O                                                                        |
| 86093    | 2.081 Å | Gilardi, R. D.; Butcher, R. J. <i>J. Chem. Cryst.</i> <b>1998</b> , <i>28</i> , 105. [Zn(H <sub>2</sub> O) <sub>6</sub> ](N(NO <sub>2</sub> ) <sub>2</sub> ) <sub>2</sub> ·2H <sub>2</sub> O                                                                                                                                                                                       |
| 143827   | 2.081 Å | Colliard, I.; Nyman, M. <i>Angew. Chem., Int. Ed.</i> <b>2021</b> , <i>60</i> , 7308. [Zn(H <sub>2</sub> O) <sub>6</sub> ] <sub>0.5</sub> [Ce <sub>4.5</sub> Ce <sub>70</sub> (OH) <sub>36</sub> O <sub>6</sub> (SO <sub>4</sub> ) <sub>67.5</sub> (H <sub>2</sub> O) <sub>64.75</sub> ]·285.75(H <sub>2</sub> O)                                                                  |
| BIPLIX   | 2.081 Å | Kumar, G.; Gupta, R. <i>Inorg. Chem.</i> <b>2013</b> , <i>52</i> , 10773. [Zn(H <sub>2</sub> O) <sub>6</sub> ][Co <sub>2</sub> Zn <sub>5</sub> C <sub>84</sub> H <sub>54</sub> N <sub>12</sub> O <sub>30</sub> ]·13.5H <sub>2</sub> O                                                                                                                                              |
| FARFOV   | 2.081 Å | Lamshoft, M.; Storp, J.; Ivanova, B.; Spitteller, M. <i>Polyhedron</i> <b>2011</b> , <i>30</i> , 2564. [Zn(H <sub>2</sub> O) <sub>6</sub> ](C <sub>7</sub> H <sub>5</sub> O <sub>6</sub> S) <sub>2</sub> ·H <sub>2</sub> O                                                                                                                                                         |
| FOXLOU   | 2.081 Å | Lian, Z.; Zhao, N.; Zhang, J.; Gu, Y.; Li, X.; Tang, B. <i>Z. Kristallogr.-New Cryst. Struct.</i> <b>2009</b> , <i>224</i> , 399. [Zn(H <sub>2</sub> O) <sub>6</sub> ][Zn(H <sub>2</sub> O) <sub>2</sub> (C <sub>12</sub> H <sub>8</sub> N <sub>2</sub> ) <sub>2</sub> ] <sub>2</sub> (1,3,5-(OOC) <sub>3</sub> C <sub>6</sub> H <sub>3</sub> ) <sub>2</sub> ·19.5H <sub>2</sub> O |
| FUGBAL01 | 2.081 Å | Gao, S.; Ng, S. W. <i>Acta Crystallogr., Sect. E</i> <b>2009</b> , <i>65</i> , m1633. [Zn(H <sub>2</sub> O) <sub>6</sub> ](4-HOC <sub>6</sub> H <sub>4</sub> SO <sub>3</sub> ) <sub>2</sub> ·2H <sub>2</sub> O                                                                                                                                                                     |



|        |         |                                                                                                                                                                                                                                                                                                                            |
|--------|---------|----------------------------------------------------------------------------------------------------------------------------------------------------------------------------------------------------------------------------------------------------------------------------------------------------------------------------|
| GINWIK | 2.081 Å | Deng, Y.-F.; Zhang, H.-L.; Hong, Q.-M.; Weng, W.-Z.; Wan, H.-L.; Zhou, Z.-H. <i>J. Solid State Chem.</i> <b>2007</b> , <i>180</i> , 3152. (NH <sub>4</sub> ) <sub>2</sub> [Zn(H <sub>2</sub> O) <sub>6</sub> ][Ti(C <sub>6</sub> H <sub>6</sub> O <sub>7</sub> ) <sub>3</sub> ] <sub>2</sub> ·6H <sub>2</sub> O            |
| POGPIN | 2.081 Å | Mohan, M.; Rajak, S.; Tremblay, A. A.; Maris, T.; Duong, A. <i>Dalton Trans.</i> <b>2019</b> , <i>48</i> , 7006. [Zn(H <sub>2</sub> O) <sub>6</sub> ][Zn(H <sub>2</sub> O) <sub>4</sub> (C <sub>6</sub> HN <sub>7</sub> O <sub>4</sub> ) <sub>2</sub> ]                                                                    |
| POKYUM | 2.081 Å | Swiatkowski, M.; Kruszynski, R. <i>Appl. Organometal. Chem.</i> <b>2019</b> , <i>33</i> , e4812. [Zn(H <sub>2</sub> O) <sub>6</sub> ](HCOO) <sub>2</sub> ·2C <sub>6</sub> H <sub>12</sub> N <sub>4</sub> ·4H <sub>2</sub> O                                                                                                |
| 62375  | 2.082 Å | Chattopadhyay, T. K.; Devreux, F.; Peters, K.; Peters, E. M.; Gmelin, E.; Ghosh, B. <i>J. Phys. C: Solid State Phys.</i> <b>1988</b> , <i>21</i> , 1321. [Zn(H <sub>2</sub> O) <sub>6</sub> ][TiF <sub>6</sub> ]                                                                                                           |
| 242129 | 2.082 Å | Klepov, V. V.; Serezhkina, L. B.; Serezhkin, V. N.; Alekseev, E. V. <i>J. Solid State Chem.</i> <b>2016</b> , <i>244</i> , 100. Na[Zn(H <sub>2</sub> O) <sub>6</sub> ][UO <sub>2</sub> (CH <sub>3</sub> COO) <sub>3</sub> ] <sub>3</sub>                                                                                   |
| DAWVIH | 2.082 Å | Rychlewska, U.; Guresic, D. M. Warzajtis, B.; Radanovic, D. D.; Djuran, M. I. <i>Polyhedron</i> <b>2005</b> , <i>24</i> , 2009. [Zn(H <sub>2</sub> O) <sub>6</sub> ][ZnC <sub>11</sub> H <sub>14</sub> N <sub>2</sub> O <sub>8</sub> ] <sub>2</sub> ·2H <sub>2</sub> O                                                     |
| FUGBAL | 2.082 Å | Zhu, Z.-B.; Gao, S.; Ng, S. W. <i>Acta Crystallogr., Sect. E</i> <b>2009</b> , <i>65</i> , m1345. [Zn(H <sub>2</sub> O) <sub>6</sub> ](4-HOC <sub>6</sub> H <sub>4</sub> SO <sub>3</sub> ) <sub>2</sub> ·2H <sub>2</sub> O                                                                                                 |
| GUBLAR | 2.082 Å | Singh, G.; Baranwal, B. P.; Kapoor, I. P. S.; Kumar, D.; Singh, C. P.; Frohlich, R. <i>J. Therm. Anal. Calorimetry</i> <b>2008</b> , <i>91</i> , 971. [Zn(H <sub>2</sub> O) <sub>6</sub> ](NO <sub>3</sub> ) <sub>2</sub> ·2C <sub>6</sub> H <sub>12</sub> N <sub>4</sub> ·4H <sub>2</sub> O                               |
| IJOQAB | 2.082 Å | Oreskova, G.; Chrappova, J.; Puskelova, J.; Simunek, J.; Schwendt, P.; Noga, J.; Gyepes, R. <i>Struct. Chem.</i> <b>2016</b> , <i>27</i> , 605. [Zn(H <sub>2</sub> O) <sub>6</sub> ][V <sub>2</sub> C <sub>4</sub> H <sub>4</sub> O <sub>12</sub> ] <sub>2</sub> ·2H <sub>2</sub> O                                        |
| KAGNIQ | 2.082 Å | Ma; J.-F.; Yang; J.; Liu, J.-F. <i>Acta Crystallogr., Sect. E</i> <b>2003</b> , <i>59</i> , m487. [Zn(H <sub>2</sub> O) <sub>6</sub> ](C <sub>7</sub> H <sub>5</sub> O <sub>6</sub> S) <sub>2</sub> ·8H <sub>2</sub> O                                                                                                     |
| QIXKIS | 2.082 Å | Natarajan, S.; Vijitha, K. V.; Dhas, S. A. M. B.; Suresh, J.; Lakshman, P. L. N. <i>Acta Crystallogr., Sect. E</i> <b>2008</b> , <i>64</i> , m581. [Zn(H <sub>2</sub> O) <sub>6</sub> ](2,4,6-(NO <sub>2</sub> ) <sub>3</sub> C <sub>6</sub> H <sub>2</sub> -O) <sub>2</sub> ·3H <sub>2</sub> O                            |
| 413095 | 2.083 Å | Chen, W.; Li, N.; Xiang, S. H. <i>J. Solid State Chem.</i> <b>2004</b> , <i>177</i> , 3229. [Zn(H <sub>2</sub> O) <sub>6</sub> ]Zn <sub>3</sub> (HPO <sub>3</sub> ) <sub>4</sub>                                                                                                                                           |
| ASUDUN | 2.083 Å | Gao; S.; Zhang; Z.-Y.; Huo; L.-H.; Zhao; H.; Zhao, J.-G. <i>Acta Crystallogr., Sect. E</i> <b>2004</b> , <i>60</i> , m444. [Zn(H <sub>2</sub> O) <sub>6</sub> ](C <sub>7</sub> H <sub>6</sub> NO <sub>3</sub> ) <sub>2</sub> ·2H <sub>2</sub> O                                                                            |
| GUHMII | 2.083 Å | Liu, J.; Lu, Y.; Li, J.; Lu, W. <i>Dyes Pigm.</i> <b>2020</b> , <i>177</i> , 108266. [Zn(H <sub>2</sub> O) <sub>6</sub> ][ZnC <sub>26</sub> H <sub>28</sub> N <sub>4</sub> O <sub>6</sub> ][ZnC <sub>10</sub> H <sub>4</sub> O <sub>8</sub> ] <sub>2</sub> ·2H <sub>2</sub> O                                              |
| LASJIB | 2.083 Å | Rui, W.; Yuchen, Y.; Xin, D.; Zhaohui, Z. <i>Yingyong Huaxue</i> <b>2016</b> , <i>33</i> , 70. [Zn(H <sub>2</sub> O) <sub>6</sub> ][ZnC <sub>8</sub> H <sub>11</sub> N <sub>2</sub> O <sub>6</sub> ] <sub>2</sub> ·2H <sub>2</sub> O                                                                                       |
| MARFAQ | 2.083 Å | Nkhili, N. L.; Rekik, W.; Naili, H.; Mhiri, T.; Bataille, T. <i>Arab. J. Chem.</i> <b>2017</b> , <i>10</i> , S2509. (C <sub>6</sub> H <sub>14</sub> N <sub>2</sub> )[Zn(H <sub>2</sub> O) <sub>6</sub> ](SeO <sub>4</sub> ) <sub>2</sub>                                                                                   |
| RUSYIO | 2.083 Å | Romero, M. J.; Pedrido, R.; Gonzalez-Noya, A. M.; Martinez-Calvo, M.; Zaragoza, G.; Bermejo, M. R. <b>2010</b> , <i>46</i> , 5115. [Zn(H <sub>2</sub> O) <sub>6</sub> ][Zn <sub>3</sub> C <sub>75</sub> H <sub>64</sub> N <sub>9</sub> O <sub>10</sub> S <sub>3</sub> ] <sub>2</sub> ·3CH <sub>3</sub> CN·H <sub>2</sub> O |

|          |         |                                                                                                                                                                                                                                                                                                                                         |
|----------|---------|-----------------------------------------------------------------------------------------------------------------------------------------------------------------------------------------------------------------------------------------------------------------------------------------------------------------------------------------|
| 242285   | 2.084 Å | Klepov, V. V.; Peresyphkina, E. V.; Serezhkina, L. B.; Karasev, M. O.; Virovets, A. V.; Serezhkin, V. N. <i>Polyhedron</i> <b>2013</b> , <i>61</i> , 137. [Zn(H <sub>2</sub> O) <sub>6</sub> ][UO <sub>2</sub> (CH <sub>3</sub> COO) <sub>3</sub> ] <sub>2</sub>                                                                        |
| DIRZEM   | 2.084 Å | Liu, C.; Wang, C.; Sun, Z.-M. <i>Inorg. Chem.</i> <b>2018</b> , <i>57</i> , 15370. [Zn(H <sub>2</sub> O) <sub>6</sub> ][U <sub>2</sub> C <sub>54</sub> H <sub>34</sub> O <sub>16</sub> Si <sub>2</sub> ] <sub>2</sub> ·5H <sub>2</sub> O                                                                                                |
| WABJUG01 | 2.084 Å | Wawrzycka, A. J.; Rogala, P.; Czerwonka, G.; Hodorowicz, M.; Stadnicka, K. <i>J. Mol. Struct.</i> <b>2016</b> , <i>1105</i> , 357. [Zn(H <sub>2</sub> O) <sub>6</sub> ][Zn(C <sub>7</sub> H <sub>4</sub> NO <sub>4</sub> ) <sub>3</sub> ] <sub>2</sub>                                                                                  |
| 419504   | 2.085 Å | Aleksandrova, M.; Haeuseler, H.; Jacquet, R.; Wagener, M. <i>Z. Naturforsch., Teil B</i> <b>2008</b> , <i>63</i> , 1367. [Zn(H <sub>2</sub> O) <sub>6</sub> ]H <sub>4</sub> I <sub>2</sub> O <sub>10</sub>                                                                                                                              |
| 421598   | 2.085 Å | Zimmermann, L. W.; Schleid, T. <i>Z. Kristallogr.-New Cryst. Struct.</i> <b>2013</b> , <i>228</i> , 558. [Zn(H <sub>2</sub> O) <sub>6</sub> ]B <sub>10</sub> H <sub>10</sub> ·2H <sub>2</sub> O                                                                                                                                         |
| 422816   | 2.085 Å | Udomvech, A.; Kongrat, P.; Pakawatchai, C.; Phetmung, H. <i>Inorg. Chem. Commun.</i> <b>2012</b> , <i>17</i> , 132. (NH <sub>4</sub> ) <sub>2</sub> [Zn(H <sub>2</sub> O) <sub>6</sub> ][V <sub>10</sub> O <sub>28</sub> ] <sub>2</sub> ·4H <sub>2</sub> O                                                                              |
| AQUREK   | 2.085 Å | Huang, L.-F.; Ji, C.-C.; Lu, Z.-Z.; Yao, X.-Q.; Hu, J.-S.; Zheng, H.-G. <i>Dalton Trans.</i> <b>2011</b> , <i>40</i> , 3138. [Zn(H <sub>2</sub> O) <sub>6</sub> ][Zn <sub>3</sub> C <sub>18</sub> H <sub>16</sub> O <sub>18</sub> ] <sub>2</sub> ·3H <sub>2</sub> O                                                                     |
| KAGNIQ01 | 2.085 Å | Song, J. H. Kim, D. W.; Kang, D. W.; Lee, W. R.; Hong, C. S. <i>Chem Commun.</i> <b>2019</b> , <i>55</i> , 9713. [Zn(H <sub>2</sub> O) <sub>6</sub> ](C <sub>7</sub> H <sub>5</sub> O <sub>6</sub> S) <sub>2</sub> ·8H <sub>2</sub> O                                                                                                   |
| PIWKOX   | 2.085 Å | Zimmermann, L. W.; Schleid, T. <i>Krist. Cryst. Mater.</i> <b>2013</b> , <i>228</i> , 558. [Zn(H <sub>2</sub> O) <sub>6</sub> ]B <sub>10</sub> H <sub>10</sub> ·2H <sub>2</sub> O                                                                                                                                                       |
| TUFGIL   | 2.085 Å | Demadis, K. D.; Barouda, E.; Zhao, H.; Raptis, R. G. <i>Polyhedron</i> <b>2009</b> , <i>28</i> , 3361. [Zn(H <sub>2</sub> O) <sub>6</sub> ][(HO <sub>3</sub> PCH <sub>2</sub> ) <sub>2</sub> NH(CH <sub>2</sub> ) <sub>4</sub> NH(CH <sub>2</sub> PO <sub>3</sub> H) <sub>2</sub> ]                                                     |
| XIGNAD   | 2.085 Å | Ichikawa, M.; Toyoguchi, F.; Akashi, H. <i>Front. Pharma.</i> <b>2003</b> , <i>29</i> , 7. Na <sub>2</sub> [Zn(H <sub>2</sub> O) <sub>6</sub> ](C <sub>24</sub> H <sub>12</sub> O <sub>16</sub> S <sub>8</sub> )·12H <sub>2</sub> O                                                                                                     |
| YONYIL   | 2.085 Å | Zhao, H.; Zhou, S.-Y.; Feng, C.; Wei, N.-X.; Wang, G.-G. <i>Inorg. Chim. Acta</i> <b>2014</b> , <i>421</i> , 169. [Zn(H <sub>2</sub> O) <sub>6</sub> ][Zn(C <sub>10</sub> H <sub>8</sub> N <sub>3</sub> O <sub>2</sub> ) <sub>3</sub> ] <sub>2</sub> ·4H <sub>2</sub> O                                                                 |
| DIKRIZ   | 2.086 Å | Honda, K.; Yamawaki, H.; Fujihisa, H.; Matsunaga, T.; Matsukawa, M. <i>Acta Crystallogr., Sect. C</i> <b>2007</b> , <i>63</i> , m423. [Zn(H <sub>2</sub> O) <sub>6</sub> ](2,4,6-(NO <sub>2</sub> ) <sub>3</sub> C <sub>6</sub> H <sub>2</sub> -O) <sub>2</sub> ·3H <sub>2</sub> O                                                      |
| GEDFEA   | 2.086 Å | Mak, T. C. W.; Huang, S.-H. <i>Polyhedron</i> <b>1987</b> , <i>6</i> , 1111. [Zn(H <sub>2</sub> O) <sub>6</sub> ][ZnC <sub>6</sub> H <sub>12</sub> Cl <sub>3</sub> N <sub>4</sub> ] <sub>2</sub> ·6H <sub>2</sub> O                                                                                                                     |
| HEMGAH   | 2.086 Å | Doxsee, K. M.; Hagadorn, J. R.; Weakley, T. J. R. <i>Inorg. Chem.</i> <b>1994</b> , <i>33</i> , 2600. [Zn(H <sub>2</sub> O) <sub>6</sub> ][ZnCl <sub>3</sub> (H <sub>2</sub> O)] <sub>2</sub> ·2(C <sub>12</sub> H <sub>24</sub> O <sub>6</sub> )·CH <sub>3</sub> COCH <sub>3</sub>                                                     |
| IDOKUK   | 2.086 Å | Igoa, F.; Martinez, S.; Zanoni, K. P. S.; Castiglioni, J.; Suescun, L.; Gonzalez-Platas, J.; de Camargo, A. S. S.; Kremer, C.; Torres, J. <i>CrystEngComm</i> <b>2018</b> , <i>20</i> , 4942. [Zn(H <sub>2</sub> O) <sub>6</sub> ][ErZn(C <sub>4</sub> H <sub>4</sub> O <sub>5</sub> ) <sub>3</sub> ] <sub>2</sub> ·1.5H <sub>2</sub> O |
| NAPCOZ   | 2.086 Å | Shankar, R.; Singh, R.; Mendiratta, S.; Jassal, A. K.; Kociok-Kohn, G.; Molloy, K. C. <i>Eur. J. Inorg. Chem.</i> <b>2017</b> , <i>2081</i> . [Zn(H <sub>2</sub> O) <sub>6</sub> ](C <sub>3</sub> H <sub>7</sub> SO <sub>3</sub> ) <sub>2</sub>                                                                                         |
| RAPMUR   | 2.086 Å | San; W.-G.; Feng; H.; Li; L.; Jin; Z.-M.; Hu, M.-L. <i>Acta Crystallogr., Sect. E</i> <b>2005</b> , <i>61</i> , m1363. (NH(C <sub>2</sub> H <sub>5</sub> ) <sub>3</sub> ) <sub>2</sub> [Zn(H <sub>2</sub> O) <sub>6</sub> ](C <sub>10</sub> H <sub>6</sub> O <sub>6</sub> S <sub>2</sub> ) <sub>2</sub>                                 |

|          |         |                                                                                                                                                                                                                                                                                                                                                  |
|----------|---------|--------------------------------------------------------------------------------------------------------------------------------------------------------------------------------------------------------------------------------------------------------------------------------------------------------------------------------------------------|
| UMANOR   | 2.086 Å | Dalrymple, S. A.; Shimizu, G. K. H. <i>Supramol. Chem.</i> <b>2003</b> , <i>15</i> , 591. [Zn(H <sub>2</sub> O) <sub>6</sub> ] <sub>3</sub> C <sub>12</sub> H <sub>12</sub> O <sub>18</sub> S <sub>6</sub> ·3C <sub>4</sub> H <sub>8</sub> O <sub>2</sub>                                                                                        |
| XILFIJ   | 2.086 Å | Chen, S.-C.; Zhang, Z.-H.; Huang, K.-L.; Luo, H.-K.; He, M.-Y.; Du, M.; Chen, Q. <i>CrystEngComm</i> <b>2013</b> , <i>15</i> , 9613. [Zn(H <sub>2</sub> O) <sub>6</sub> ](p-C <sub>6</sub> Cl <sub>4</sub> (COO) <sub>2</sub> )·4H <sub>2</sub> O                                                                                                |
| 9450     | 2.087 Å | Voit, E. I.; Didenko, N. A.; Gerasimenko, A. V.; Slobodyuk, A. B. <i>J. Fluorine Chem.</i> <b>2020</b> , <i>232</i> , 109475. [Zn(H <sub>2</sub> O) <sub>6</sub> ][Zr <sub>2</sub> F <sub>10</sub> ]                                                                                                                                             |
| 237726   | 2.087 Å | Hennings, E.; Schmidt, H., Voigt, W. <i>Acta Crystallogr., Sect. E</i> <b>2014</b> , <i>70</i> , 515. [Zn(H <sub>2</sub> O) <sub>6</sub> ][ZnCl <sub>4</sub> ]·3H <sub>2</sub> O                                                                                                                                                                 |
| BOGRIA   | 2.087 Å | Gui, J.; Zhou, Q.; Pan, C.-M.; Yabe, Y.; Burns, A. C.; Collins, M. R.; Ornelas, M. A.; Ishihara, Y.; Baran, P. S. <i>J. Am. Chem. Soc.</i> <b>2014</b> , <i>136</i> , 4853. [Zn(H <sub>2</sub> O) <sub>6</sub> ](O <sub>2</sub> SCH <sub>2</sub> SO <sub>2</sub> C <sub>6</sub> H <sub>5</sub> ) <sub>2</sub>                                    |
| KASNUO   | 2.087 Å | Jin, Z.-M.; Li, L.; Hu, M.-L.; Su, H.; Tong, C.-X. <i>Acta Crystallogr., Sect. E</i> <b>2005</b> , <i>61</i> , m1849. [Zn(H <sub>2</sub> O) <sub>6</sub> ][ZnC <sub>8</sub> H <sub>10</sub> Cl <sub>3</sub> N <sub>4</sub> O <sub>2</sub> ] <sub>2</sub> ·8H <sub>2</sub> O                                                                      |
| MAVDAQ   | 2.087 Å | Wang, L.-Y.; Fan, R.-Q.; Chen, H.; Sun, C.-F.; Yang, Y.-L. <i>Guangpux. Yu Guang. Fenxi</i> <b>2011</b> , <i>31</i> , 3298. [Zn(H <sub>2</sub> O) <sub>6</sub> ](C <sub>16</sub> H <sub>8</sub> O <sub>8</sub> )                                                                                                                                 |
| MAVDAQ01 | 2.087 Å | Henling, L. M.; Marsh, R. E. <i>Acta Crystallogr., Sect. E</i> <b>2014</b> , <i>70</i> , 834. [Zn(H <sub>2</sub> O) <sub>6</sub> ](C <sub>16</sub> H <sub>8</sub> O <sub>8</sub> )                                                                                                                                                               |
| PICDIQ   | 2.087 Å | Klepov, V. V.; Peresyphkina, E. V.; Serezhkina, L. B.; Karasev, M. O.; Virovets, A. V.; Serezhkin, V. N. <i>Polyhedron</i> <b>2013</b> , <i>61</i> , 137. [Zn(H <sub>2</sub> O) <sub>6</sub> ][UO <sub>2</sub> (OOCCH <sub>3</sub> ) <sub>3</sub> ] <sub>2</sub>                                                                                 |
| RAXCID   | 2.087 Å | Yu, Q.; Zhu, L.-G.; Bian, H.-D.; Deng, J.-H.; Yang, X.-E.; Guo, G.-Q.; Liang, H. <i>Jiegou Huaxue</i> <b>2005</b> , <i>24</i> , 1271. [Zn(H <sub>2</sub> O) <sub>6</sub> ](ClO <sub>4</sub> ) <sub>2</sub> ·4C <sub>7</sub> H <sub>8</sub> N <sub>4</sub> O <sub>2</sub>                                                                         |
| SIWPEU   | 2.087 Å | Singh, G.; Baranwal, B. P.; Kapoor, I. P. S.; Kumar, D.; Frohlich, R. <i>J. Phys. Chem. A</i> <b>2007</b> , <i>111</i> , 12972. [Zn(H <sub>2</sub> O) <sub>6</sub> ](ClO <sub>4</sub> ) <sub>2</sub> ·2C <sub>6</sub> H <sub>12</sub> N <sub>4</sub> ]·2H <sub>2</sub> O                                                                         |
| YOSCOZ   | 2.087 Å | Qiu, L.-G.; Gu, L.-N.; Hu, G.; Zhang, L.-D. <i>J. Solid State Chem.</i> <b>2009</b> , <i>182</i> , 502. [Zn(H <sub>2</sub> O) <sub>6</sub> ][Zn(H <sub>2</sub> O) <sub>2</sub> (C <sub>12</sub> H <sub>8</sub> N <sub>2</sub> ) <sub>2</sub> ](1,3,5-(OOC) <sub>3</sub> C <sub>6</sub> H <sub>3</sub> ) <sub>2</sub> ·22H <sub>2</sub> O         |
| 166589   | 2.088 Å | Kokunov, Y. V.; Gorbunova, Y. E.; Petrov, V. N.; Gustyakova, M. P.; Buslaev, Y. A. <i>Dokl. Akad. Nauk SSSR</i> <b>1989</b> , <i>307</i> , 1126-1130. [Zn(H <sub>2</sub> O) <sub>6</sub> ](SnO <sub>3</sub> ) <sub>2</sub>                                                                                                                       |
| AXODAU   | 2.088 Å | Oelkers, B.; Schaffner, D.; Sun, Y. <i>Chem. Sel.</i> <b>2016</b> , <i>1</i> , 4440. [Zn(H <sub>2</sub> O) <sub>6</sub> ][Zn(H <sub>2</sub> O) <sub>4</sub> (C(SO <sub>3</sub> ) <sub>3</sub> )                                                                                                                                                  |
| DUVNUF   | 2.088 Å | Klepov, V. V.; Serezhkina, L. B.; Pushkin, D. V.; Alekseev, E. V.; Grigor'ev, M. S.; Sergeeva, O. A.; Shimin, N. A.; Serezhkin, V. N. <i>Eur. J. Inorg. Chem.</i> <b>2016</b> , 118. [Zn(H <sub>2</sub> O) <sub>6</sub> ][UO <sub>2</sub> (OOC(CH <sub>2</sub> )(CH <sub>3</sub> )) <sub>3</sub> ] <sub>2</sub> ·8H <sub>2</sub> O               |
| FAMKEL   | 2.088 Å | Tabatabaee, M.; Tahriri, M.; Tahriri, M.; Ozawa, Y.; Neumuller, B.; Fujioka, H.; Toriumi, K. <i>Polyhedron</i> <b>2012</b> , <i>33</i> , 336. [Zn(H <sub>2</sub> O) <sub>6</sub> ](C <sub>2</sub> H <sub>5</sub> N <sub>4</sub> ) <sub>2</sub> [Zn(C <sub>7</sub> H <sub>3</sub> NO <sub>4</sub> ) <sub>2</sub> ] <sub>2</sub> ·H <sub>2</sub> O |
| FUGWUU   | 2.088 Å | Huo, L.-H.; Gao, S.; Xu, S.; Zhao, H. <i>Acta Crystallogr., Sect. E</i> <b>2005</b> , <i>61</i> , m449. [Zn(H <sub>2</sub> O) <sub>6</sub> ]C <sub>10</sub> H <sub>6</sub> O <sub>6</sub> S <sub>2</sub>                                                                                                                                         |
| GAYTIM   | 2.088 Å | Yerra, S.; Das, S. K. <i>J. Mol. Struct.</i> <b>2017</b> , <i>1146</i> , 23. [Zn(H <sub>2</sub> O) <sub>6</sub> ][Na <sub>2</sub> (H <sub>2</sub> O) <sub>12</sub> V <sub>10</sub> O <sub>28</sub> ]·4H <sub>2</sub> O                                                                                                                           |
| GIXJIH   | 2.088 Å | Rohe, M.; Merz, K. <i>Chem. Commun.</i> <b>2008</b> , 862. (NH <sub>4</sub> ) <sub>4</sub> [Zn(H <sub>2</sub> O) <sub>6</sub> ][Ti <sub>4</sub> C <sub>24</sub> H <sub>18</sub> O <sub>36</sub> ]·6H <sub>2</sub> O                                                                                                                              |

|          |         |                                                                                                                                                                                                                                                                                                                                           |
|----------|---------|-------------------------------------------------------------------------------------------------------------------------------------------------------------------------------------------------------------------------------------------------------------------------------------------------------------------------------------------|
| OBUPEJ   | 2.088 Å | Felder, J.; Yeon, J.; Smith, M.; zur Loye, H.-C. <i>Inorg. Chem. Front.</i> <b>2017</b> , <i>4</i> , 368.<br>[Zn(H <sub>2</sub> O) <sub>6</sub> ][UF <sub>5</sub> ] <sub>2</sub> ·2H <sub>2</sub> O                                                                                                                                       |
| UGURET02 | 2.088 Å | Clegg, W.; Harrington, R. W. CCDC deposition number 2182352, <b>2022</b> . [Zn(H <sub>2</sub> O) <sub>6</sub> ](C <sub>10</sub> H <sub>4</sub> O <sub>8</sub> )                                                                                                                                                                           |
| 237725   | 2.089 Å | Hennings, E.; Schmidt, H.; Voigt, W. <i>Acta Crystallogr., Sect. E</i> <b>2014</b> , <i>70</i> , 515. [Zn(H <sub>2</sub> O) <sub>6</sub> ][ZnCl <sub>4</sub> ]                                                                                                                                                                            |
| 710007   | 2.089 Å | Euler, H.; Barbier, B.; Meents, A.; Kirfel, A. <i>Z. Kristallogr.-New Cryst. Struct.</i> <b>2009</b> , <i>224</i> , 355-359.<br>Tl <sub>2</sub> [Zn(H <sub>2</sub> O) <sub>6</sub> ](SO <sub>4</sub> ) <sub>2</sub>                                                                                                                       |
| 710013   | 2.089 Å | Euler, H.; Barbier, B.; Meents, A.; Kirfel, A. <i>Z. Kristallogr.-New Cryst. Struct.</i> <b>2009</b> , <i>224</i> , 360-364.<br>Tl <sub>2</sub> [Zn(H <sub>2</sub> O) <sub>6</sub> ](SeO <sub>4</sub> ) <sub>2</sub>                                                                                                                      |
| GOMKAV   | 2.089 Å | Wang, Q.-Y. <i>Z. Kristallogr.-New Cryst. Struct.</i> <b>2009</b> , <i>224</i> , 71. [Zn(H <sub>2</sub> O) <sub>6</sub> ](C <sub>18</sub> H <sub>15</sub> O <sub>7</sub> S) <sub>2</sub> ·4H <sub>2</sub> O                                                                                                                               |
| LEZCEA   | 2.089 Å | Maldonado, C. R.; Quiros, M.; Salas, J. M. <i>Dalton Trans.</i> <b>2012</b> , <i>41</i> , 10390.<br>[Zn(H <sub>2</sub> O) <sub>6</sub> ](C <sub>6</sub> H <sub>6</sub> N <sub>5</sub> O <sub>2</sub> ) <sub>2</sub> ·C <sub>10</sub> H <sub>8</sub> N <sub>2</sub>                                                                        |
| QODBUH   | 2.089 Å | Wu, M.; Yuan, D.; Jiang, F.; Chen, B.; Gao, Q.; Wei, W.; Hong, M. <i>Supramol. Chem.</i> <b>2008</b> , <i>20</i> , 289.<br>[Zn(H <sub>2</sub> O) <sub>6</sub> ](C <sub>12</sub> H <sub>14</sub> N <sub>2</sub> ) <sub>3</sub> [Zn <sub>2</sub> C <sub>48</sub> H <sub>28</sub> O <sub>36</sub> S <sub>16</sub> ]·14H <sub>2</sub> O       |
| QUKVAO   | 2.089 Å | Sattler, A.; Budde, M. R.; Schnick, W. <i>Z. Anorg. Allg. Chem.</i> <b>2009</b> , <i>635</i> , 1933.<br>(NH <sub>4</sub> ) <sub>2</sub> [Zn(H <sub>2</sub> O) <sub>6</sub> ](C <sub>6</sub> H <sub>7</sub> N <sub>3</sub> O <sub>3</sub> ) <sub>2</sub> ·2H <sub>2</sub> O                                                                |
| RAYRAM   | 2.089 Å | Tepavitcharova, S.; Rabadjieva, D.; Havlicek, D.; Nemeč, I.; Vojtisek, P.; Plocek, J.; Koleva, Z. <i>J. Mol. Struct.</i> <b>2012</b> , <i>1018</i> , 113. [Zn(H <sub>2</sub> O) <sub>6</sub> ](SO <sub>4</sub> ) <sub>2</sub> ·2[Zn(H <sub>2</sub> O) <sub>4</sub> (OOCCH <sub>2</sub> NH <sub>3</sub> ) <sub>2</sub> ]·2H <sub>2</sub> O |
| VURPOP   | 2.089 Å | Naili, H.; BenHassan, D.; Rekić, W. CCDC deposition number 1433262, <b>2015</b> .<br>[Zn(H <sub>2</sub> O) <sub>6</sub> ](C <sub>4</sub> H <sub>12</sub> N <sub>2</sub> ) <sub>2</sub> (NO <sub>3</sub> ) <sub>6</sub>                                                                                                                    |
| 63662    | 2.090 Å | Stadnicka, K.; Glazer, A. M.; Koralewki, M. <i>Acta Crystallogr., Sect. B</i> <b>1988</b> , <i>44</i> , 356. [Zn(H <sub>2</sub> O) <sub>6</sub> ]SeO <sub>4</sub>                                                                                                                                                                         |
| HEFPAN   | 2.090 Å | Belaj, F.; Furpa, K. M.; Mosch-Zanetti, N. C. <b>2022</b> , CCDC deposition no. 2178714.<br>[Zn(H <sub>2</sub> O) <sub>6</sub> ][Zn <sub>2</sub> C <sub>24</sub> H <sub>33</sub> N <sub>6</sub> O <sub>9</sub> S <sub>3</sub> ] <sub>2</sub> ·2C <sub>8</sub> H <sub>14</sub> O <sub>4</sub> ·2H <sub>2</sub> O                           |
| JUVSEY   | 2.090 Å | Bezrukavnikova, I. M.; Polynova, T. N.; Kovaleva, I. B.; Mitrofanova, N. D.; Porai-Koshits, M. A. <i>Koord. Khim.</i> <b>1992</b> , <i>18</i> , 150. [Zn(H <sub>2</sub> O) <sub>6</sub> ][NiC <sub>10</sub> H <sub>12</sub> N <sub>2</sub> O <sub>8</sub> ] <sub>2</sub> ·8H <sub>2</sub> O                                               |
| QUGLEM   | 2.090 Å | Kerber, W. D.; Sean Hartnett, D.; Wang, A.; Mafrice, C. H.; Siegler, M. A. <i>Inorg. Chim. Acta</i> <b>2020</b> , <i>506</i> , 119547. [Zn(H <sub>2</sub> O) <sub>6</sub> ][Zn <sub>2</sub> (H <sub>2</sub> O) <sub>3</sub> (C <sub>16</sub> H <sub>14</sub> FN <sub>2</sub> O <sub>10</sub> )]·2H <sub>2</sub> O.                        |
| RAYRAM03 | 2.090 Å | Fortes, A. D.; Howard, C. M.; Wood, I. G.; Gutmann, M. J. <i>J. Mol. Struct.</i> <b>2012</b> , <i>1018</i> , 113.<br>[Zn(H <sub>2</sub> O) <sub>6</sub> ](SO <sub>4</sub> ) <sub>2</sub> ·2[Zn(H <sub>2</sub> O) <sub>4</sub> (OOCCH <sub>2</sub> NH <sub>3</sub> ) <sub>2</sub> ]·2H <sub>2</sub> O                                      |
| UGAFEP   | 2.090 Å | Kammoun, O.; Rekić, W.; Bataille, T.; Mahmudov, K. T.; Kopylovich, M. N.; Naili, H. <i>J. Organometal. Chem.</i> <b>2013</b> , <i>741</i> , 136. [Zn(H <sub>2</sub> O) <sub>6</sub> ](C <sub>4</sub> H <sub>7</sub> N <sub>2</sub> ) <sub>2</sub> (SO <sub>4</sub> ) <sub>2</sub> ·2H <sub>2</sub> O                                      |
| YAVHOS   | 2.090 Å | Kumberger, O.; Riede, J.; Schmidbaur, H. <i>Z. Naturforsch., Teil B</i> <b>1993</b> , <i>48</i> , 961.<br>[Zn(H <sub>2</sub> O) <sub>6</sub> ](C <sub>5</sub> H <sub>3</sub> N <sub>2</sub> O <sub>4</sub> ) <sub>2</sub> ·2H <sub>2</sub> O.                                                                                             |

|          |         |                                                                                                                                                                                                                                                                                                                                                              |
|----------|---------|--------------------------------------------------------------------------------------------------------------------------------------------------------------------------------------------------------------------------------------------------------------------------------------------------------------------------------------------------------------|
| ZOLVED   | 2.090 Å | Kruszynski, R.; Sieranski, T.; Swiatkowski, M.; Zielak, M.; Wojciechowski, J.; Dzierzawski, M.; Lewinski, B. <i>J. Coord. Chem.</i> <b>2014</b> , <i>67</i> , 1332. [Zn(H <sub>2</sub> O) <sub>6</sub> ][Zn(H <sub>2</sub> O) <sub>4</sub> (C <sub>6</sub> H <sub>12</sub> N <sub>2</sub> ) <sub>2</sub> ](SO <sub>4</sub> ) <sub>2</sub> ·6H <sub>2</sub> O |
| AHOWOK   | 2.091 Å | Bera, M.; Musie, G. T.; Powell, D. R. <i>Inorg. Chem.</i> <b>2009</b> , <i>48</i> , 4625. [Zn(H <sub>2</sub> O) <sub>6</sub> ][Zn(H <sub>2</sub> O) <sub>2</sub> C <sub>23</sub> H <sub>25</sub> N <sub>4</sub> O <sub>7</sub> ] <sub>2</sub> ·12H <sub>2</sub> O.                                                                                           |
| CIVCIV   | 2.091 Å | Shi, J.; Wang, Y.-C.; Wang, Q.-Y.; Zhang, Z.-T. <i>Inorg. Chim. Acta</i> <b>2014</b> , <i>409</i> , 259. [Zn(H <sub>2</sub> O) <sub>6</sub> ](C <sub>17</sub> H <sub>12</sub> BrO <sub>9</sub> S) <sub>2</sub> ·2H <sub>2</sub> O                                                                                                                            |
| COCYAV   | 2.091 Å | Zhang, S.-G.; Feng, Y.-L.; Wen, Y.-H. <i>Wuji Huaxue Xuebao</i> <b>2008</b> , <i>24</i> , 581. [Zn(H <sub>2</sub> O) <sub>6</sub> ](C <sub>9</sub> H <sub>7</sub> N <sub>4</sub> O <sub>3</sub> S) <sub>2</sub>                                                                                                                                              |
| EBIKIL   | 2.091 Å | Shi, L.-X.; Xu, X.; Wu, C.-D. <i>CrystEngComm</i> <b>2011</b> , <i>13</i> , 6027. [Zn(H <sub>2</sub> O) <sub>6</sub> ][Gd <sub>2</sub> C <sub>18</sub> H <sub>10</sub> N <sub>2</sub> O <sub>20</sub> ] <sub>2</sub> ·4H <sub>2</sub> O                                                                                                                      |
| KUNJOT   | 2.091 Å | Knöpe, K. E.; Cahill, C. L. <i>Eur. J. Inorg. Chem.</i> <b>2010</b> , 1177. [Zn(H <sub>2</sub> O) <sub>6</sub> ][(UO <sub>2</sub> ) <sub>4</sub> C <sub>8</sub> H <sub>14</sub> O <sub>22</sub> P <sub>4</sub> ] <sub>2</sub> ·5H <sub>2</sub> O                                                                                                             |
| ONOTAN   | 2.091 Å | Wagner, C.; Merzweiler, K. <i>Z. Anorg. Allg. Chem.</i> <b>2010</b> , <i>636</i> , 557. [Zn(H <sub>2</sub> O) <sub>6</sub> ](p-HOCC <sub>6</sub> H <sub>4</sub> SO <sub>3</sub> ) <sub>2</sub>                                                                                                                                                               |
| RAYRAM01 | 2.091 Å | Oguey, S.; Jacquier, Y.; Neels, A.; Stoeckli-Evans, H. CCDC depositions number 936400, <b>2013</b> . [Zn(H <sub>2</sub> O) <sub>6</sub> ](SO <sub>4</sub> ) <sub>2</sub> ·2[Zn(H <sub>2</sub> O) <sub>4</sub> (OOCCH <sub>2</sub> NH <sub>3</sub> ) <sub>2</sub> ] <sub>2</sub> ·2H <sub>2</sub> O                                                           |
| ZNATOS   | 2.091 Å | Hargreaves, A. <i>Acta Crystallogr.</i> <b>1957</b> , <i>10</i> , 191. [Zn(H <sub>2</sub> O) <sub>6</sub> ](p-CH <sub>3</sub> C <sub>6</sub> H <sub>4</sub> SO <sub>3</sub> ) <sub>2</sub>                                                                                                                                                                   |
| 65012    | 2.092 Å | Maslen, E.N.; Watson, K.J.; Ridout, S.C.; Moore, F. H. <i>Acta Crystallogr., Sect. C</i> <b>1988</b> , <i>44</i> , 1510. (NH <sub>4</sub> ) <sub>2</sub> [Zn(H <sub>2</sub> O) <sub>6</sub> ](SO <sub>4</sub> ) <sub>2</sub>                                                                                                                                 |
| 409496   | 2.092 Å | Euler, H.; Barbier, B.; Klumpp, S.; Kirfel, A. <i>Z. Kristallogr.-New Cryst. Struct.</i> <b>2000</b> , <i>215</i> , 473. Rb <sub>2</sub> [Zn(H <sub>2</sub> O) <sub>6</sub> ](SO <sub>4</sub> ) <sub>2</sub>                                                                                                                                                 |
| 409750   | 2.092 Å | Euler, H.; Barbier, B.; Meents, A.; Kirfel, A. <i>Z. Kristallogr.-New Cryst. Struct.</i> <b>2003</b> , <i>218</i> , 405. Cs <sub>2</sub> [Zn(H <sub>2</sub> O) <sub>6</sub> ](SeO <sub>4</sub> ) <sub>2</sub>                                                                                                                                                |
| AFECUK   | 2.092 Å | Genther, D. J.; Squattrito, P. J.; Kirschbaum, K.; Pinkerton, A. A. <i>Acta Crystallogr., Sect. E</i> <b>2007</b> , <i>63</i> , m2262. [Zn(H <sub>2</sub> O) <sub>6</sub> ](C <sub>10</sub> H <sub>8</sub> NS <sub>6</sub> S <sub>2</sub> ) <sub>2</sub> ·4H <sub>2</sub> O                                                                                  |
| DURKAD   | 2.092 Å | Tian, D.-M.; Shi, C.-Y.; Hao, C.-J. <i>Acta Crystallogr., Sect. E</i> <b>2010</b> , <i>66</i> , m968. [Zn(H <sub>2</sub> O) <sub>6</sub> ](C <sub>16</sub> H <sub>12</sub> O <sub>6</sub> )·H <sub>2</sub> O                                                                                                                                                 |
| EKOYUA   | 2.092 Å | Bednarchuk, T. J.; Kinzhybalov, V.; Pietraszko, A. <i>Acta Crystallogr., Sect. C</i> <b>2016</b> , <i>72</i> , 432. [Zn(H <sub>2</sub> O) <sub>6</sub> ](2-H <sub>2</sub> NC <sub>5</sub> H <sub>5</sub> N) <sub>2</sub> (SO <sub>4</sub> ) <sub>2</sub>                                                                                                     |
| HACYZN   | 2.092 Å | Gupta, M. P.; Agrawal, J. L. <i>Crystal. Struct. Commun.</i> <b>1977</b> , <i>6</i> , 103. [Zn(H <sub>2</sub> O) <sub>6</sub> ](HOCCOO) <sub>2</sub> ·2H <sub>2</sub> O                                                                                                                                                                                      |
| JOBMUJ   | 2.092 Å | Curtiss, A. B. S.; Bera, M.; Musie, G. T.; Powell, D. R. <i>Dalton Trans.</i> <b>2008</b> , 2717. [Zn(H <sub>2</sub> O) <sub>6</sub> ][Zn(H <sub>2</sub> O) <sub>2</sub> (C <sub>23</sub> H <sub>23</sub> N <sub>2</sub> O <sub>9</sub> )] <sub>2</sub> ·12H <sub>2</sub> O                                                                                  |
| RAYRAM02 | 2.092 Å | Balamurugan, M. S.; Subramanian, P.; Rao, P. S. CCDC deposition number 806684, <b>2011</b> . [Zn(H <sub>2</sub> O) <sub>6</sub> ](SO <sub>4</sub> ) <sub>2</sub> ·2[Zn(H <sub>2</sub> O) <sub>4</sub> (OOCCH <sub>2</sub> NH <sub>3</sub> ) <sub>2</sub> ] <sub>2</sub> ·2H <sub>2</sub> O                                                                   |
| RUZMOQ   | 2.092 Å | Deng, H.-Q.; Jiang, Q.-Y.; Xu, J.-R.; Hu, Y.-M. <i>Adv. Mater. Res.</i> <b>2012</b> , <i>554/556</i> , 536. [Zn(H <sub>2</sub> O) <sub>6</sub> ][BiC <sub>10</sub> H <sub>12</sub> N <sub>2</sub> O <sub>8</sub> ] <sub>2</sub> ·2H <sub>2</sub> O                                                                                                           |

|        |         |                                                                                                                                                                                                                                                                                                                          |
|--------|---------|--------------------------------------------------------------------------------------------------------------------------------------------------------------------------------------------------------------------------------------------------------------------------------------------------------------------------|
| SAMSOE | 2.092 Å | Dutta, R.; Akhuli, B.; Ghosh, P. <i>Dalton Trans.</i> <b>2015</b> , 44, 15075.<br>[Zn(H <sub>2</sub> O) <sub>6</sub> ][Zn <sub>3</sub> C <sub>108</sub> H <sub>132</sub> N <sub>48</sub> O <sub>30</sub> ](SO <sub>4</sub> ) <sub>4</sub> ·18H <sub>2</sub> O                                                            |
| UMANIF | 2.092 Å | Dalrymple, S. A.; Shimizu, G. K. H. <i>Supramol. Chem.</i> <b>2003</b> , 15, 591.<br>[Zn(H <sub>2</sub> O) <sub>6</sub> ] <sub>3</sub> C <sub>12</sub> H <sub>12</sub> O <sub>18</sub> S <sub>6</sub> ·3CH <sub>3</sub> COCH <sub>3</sub>                                                                                |
| VIKDID | 2.092 Å | Wen, Y.-H.; Ng, S. W. <i>Acta Crystallogr., Sect. E</i> <b>2007</b> , 63, m2378. [Zn(H <sub>2</sub> O) <sub>6</sub> ][ZnC <sub>11</sub> H <sub>13</sub> O <sub>11</sub> ] <sub>2</sub> (SO <sub>4</sub> ) <sub>2</sub>                                                                                                   |
| 83335  | 2.093 Å | Mostafa, G.; Ray, S.; Mukhopadhyay, A. <i>Z. Kristallogr.</i> <b>1996</b> , 211, 373. [Zn(H <sub>2</sub> O) <sub>6</sub> ][TiF <sub>6</sub> ]                                                                                                                                                                            |
| 90098  | 2.093 Å | Simmons, C. J.; Hitchman, M. A.; Stratemeier, H. <i>Inorg. Chem.</i> <b>2000</b> , 39, 6124.<br>(NH <sub>4</sub> ) <sub>2</sub> [Zn(H <sub>2</sub> O) <sub>6</sub> ](SO <sub>4</sub> ) <sub>2</sub>                                                                                                                      |
| 41339  | 2.093 Å | Araya, M. A.; Cotton, F. A.; Daniels, M. N.; Falvello, L. R.; Murillo, C. A. <i>Inorg. Chem.</i> <b>1993</b> , 32, 4853-4860. (NH <sub>4</sub> ) <sub>2</sub> [Zn(H <sub>2</sub> O) <sub>6</sub> ](SO <sub>4</sub> ) <sub>2</sub>                                                                                        |
| DIYJAZ | 2.093 Å | Hou, Y.; An, H.; Chang, S.; Zhang, J. <i>Cat. Sci. Tech.</i> <b>2019</b> , 9, 2445.<br>Rb <sub>2</sub> [Zn(H <sub>2</sub> O) <sub>6</sub> ][As <sub>2</sub> Mo <sub>12</sub> ZnC <sub>16</sub> H <sub>42</sub> N <sub>4</sub> O <sub>57</sub> ]·14H <sub>2</sub> O                                                       |
| MEYLEH | 2.093 Å | Junk, P. C.; Smith, M. K.; Steed, J. W. <i>Polyhedron</i> <b>2001</b> , 20, 2979.<br>[Zn(H <sub>2</sub> O) <sub>6</sub> ][ZnC <sub>16</sub> H <sub>32</sub> O <sub>8</sub> ](ClO <sub>4</sub> ) <sub>2</sub> ·2(C <sub>8</sub> H <sub>16</sub> O <sub>4</sub> )·8H <sub>2</sub> O                                        |
| NAKJUG | 2.093 Å | Carlson, Z. A.; Harrod, B. L.; Widener, D.; Howard, W. A.; Pang, K. <i>J. Chem. Cryst.</i> <b>2010</b> , 40, 863.<br>[Zn(H <sub>2</sub> O) <sub>6</sub> ][ZnC <sub>16</sub> H <sub>32</sub> O <sub>8</sub> ]·4H <sub>2</sub> O                                                                                           |
| REBTEZ | 2.093 Å | Paluchowska, B.; Maurin, J. K.; Leciejewicz, J. <i>J. Coord. Chem.</i> <b>2001</b> , 52, 253.<br>[Zn(H <sub>2</sub> O) <sub>6</sub> ][Na <sub>2</sub> Zn <sub>8</sub> C <sub>90</sub> H <sub>56</sub> O <sub>56</sub> ]                                                                                                  |
| 409649 | 2.094 Å | Fleck, M.; Kolitsch, U. <i>Z. Kristallogr.-New Cryst. Struct.</i> <b>2002</b> , 217, 471. (NH <sub>4</sub> ) <sub>2</sub> [Zn(H <sub>2</sub> O) <sub>6</sub> ](SeO <sub>4</sub> ) <sub>2</sub>                                                                                                                           |
| 409742 | 2.094 Å | Euler, H.; Barbier, B.; Meents, A.; Kirfel, A. <i>Z. Kristallogr.-New Cryst. Struct.</i> <b>2003</b> , 218, 409.<br>Cs <sub>2</sub> [Zn(H <sub>2</sub> O) <sub>6</sub> ](SO <sub>4</sub> ) <sub>2</sub>                                                                                                                  |
| 411335 | 2.094 Å | Adamczyk, B.; Troyanov, S. I.; Schneider, M.; Kemnitz, E. <i>Z. Anorg. Allg. Chem.</i> <b>2000</b> , 626, 2543.<br>NH <sub>4</sub> [Zn(H <sub>2</sub> O) <sub>6</sub> ][AlF <sub>6</sub> ]                                                                                                                               |
| 427974 | 2.094 Å | Yerra, S.; Das, S. K. <i>J. Mol. Struct.</i> <b>2017</b> , 1146, 23.<br>[Zn(H <sub>2</sub> O) <sub>6</sub> ][Na <sub>2</sub> (H <sub>2</sub> O) <sub>6</sub> (H <sub>2</sub> O) <sub>4</sub> Zn(H <sub>2</sub> O) <sub>2</sub> ][V <sub>10</sub> O <sub>28</sub> ]·4H <sub>2</sub> O                                     |
| HITFUN | 2.094 Å | Shen, L.; Li, W.-X.; Xia, Q.-J.; Yang, J.; Liu, Y.; Ji, C.; Wu, C.-Y.; Zhai, Y.-S.; Yang, G.-W.; Li, Q.-Y. <i>J. Chem. Cryst.</i> <b>2013</b> , 43, 585. [Zn(H <sub>2</sub> O) <sub>6</sub> ][ZnC <sub>13</sub> H <sub>10</sub> ClN <sub>2</sub> O <sub>5</sub> ] <sub>2</sub> ·4H <sub>2</sub> O                        |
| IPEVEG | 2.094 Å | Said, S.; Naili, H.; Bataille, T.; Herrera, R. P. <i>CrystEngComm</i> <b>2016</b> , 18, 5365. [Zn(H <sub>2</sub> O) <sub>6</sub> ](2-NH <sub>2</sub> -6-CH <sub>3</sub> C <sub>5</sub> H <sub>4</sub> N) <sub>2</sub> (SO <sub>4</sub> ) <sub>2</sub> ·2H <sub>2</sub> O                                                 |
| KAMPEU | 2.094 Å | Rekik, W.; Naili, H.; Mhiri, T.; Bataille, T. <i>Acta Crystallogr., Sect. E</i> <b>2005</b> , 61, m629.<br>(C <sub>4</sub> H <sub>12</sub> N <sub>2</sub> )[Zn(H <sub>2</sub> O) <sub>6</sub> ](SO <sub>4</sub> ) <sub>2</sub>                                                                                           |
| OYUYAJ | 2.094 Å | Boiko, V. N.; Filatov, A. A.; Yagupolskii, Y. L.; Tyrre, W.; Naumann, D.; Pantenburg, I.; Fischer, H. T. M.; Schulz, F. <i>J. Fluorine Chem.</i> <b>2011</b> , 132, 1219. [Zn(H <sub>2</sub> O) <sub>6</sub> ](2,4,6-(SO <sub>2</sub> F) <sub>3</sub> C <sub>6</sub> H <sub>2</sub> O) <sub>2</sub> ·5.5H <sub>2</sub> O |

|        |         |                                                                                                                                                                                                                                                                                                                                                   |
|--------|---------|---------------------------------------------------------------------------------------------------------------------------------------------------------------------------------------------------------------------------------------------------------------------------------------------------------------------------------------------------|
| YEYYEJ | 2.094 Å | Jin, K. P.; Jiang, H. J.; Wang, Y.; Zhang, D. P.; Mei, J.; Cui, S. H. <i>J. Cluster Sci.</i> <b>2018</b> , <i>29</i> , 785.<br>[Zn(H <sub>2</sub> O) <sub>6</sub> ](H <sub>3</sub> N(CH <sub>2</sub> ) <sub>4</sub> NH <sub>3</sub> ) <sub>2</sub> [V <sub>10</sub> O <sub>28</sub> ]·6H <sub>2</sub> O                                           |
| 250995 | 2.095 Å | Simmons, C. J.; Stratemeier, H.; Hitchman, M. A.; Riley, M. J. <i>Inorg. Chem.</i> <b>2013</b> , <i>52</i> , 10481.<br>Rb <sub>2</sub> [Zn(H <sub>2</sub> O) <sub>6</sub> ](SeO <sub>4</sub> ) <sub>2</sub>                                                                                                                                       |
| 409985 | 2.095 Å | Euler, H.; Barbier, B.; Meents, A.; Kirfel, A. <i>Z. Kristallogr.-New Cryst. Struct.</i> <b>2009</b> , <i>224</i> , 171.<br>K <sub>2</sub> [Zn(H <sub>2</sub> O) <sub>6</sub> ](SO <sub>4</sub> ) <sub>2</sub>                                                                                                                                    |
| AMAVIV | 2.095 Å | Bednarchuk, T. J.; Kinzhybalo, V.; Bednarchuk, O.; Pietraszko, A. <i>J. Mol. Struct.</i> <b>2016</b> , <i>1120</i> , 138.<br>[Zn(H <sub>2</sub> O) <sub>6</sub> ](4-H <sub>2</sub> N-C <sub>5</sub> H <sub>5</sub> N) <sub>2</sub> (SO <sub>4</sub> ) <sub>2</sub>                                                                                |
| BEMQES | 2.095 Å | Priyadharshini, A.; Kalainathan, S. <i>J. Mater. Sci.: Mater. Electron</i> <b>2017</b> , <i>28</i> , 5089.<br>[Zn(H <sub>2</sub> O) <sub>6</sub> ](C <sub>6</sub> H <sub>6</sub> N <sub>3</sub> ) <sub>2</sub> (SO <sub>4</sub> ) <sub>2</sub> ·4H <sub>2</sub> O                                                                                 |
| FIYLIL | 2.095 Å | Bazhina, E. S.; Gogoleva, N. V.; Aleksandrov, G. G.; Kiskin, M. A.; Efimov, N. N.; Bogomyakov, A. S.; Ugolokova, E. A.; Minin, V. V.; Sidorov, A. A.; Eremenko, I. L. <i>Chem. Sel.</i> <b>2018</b> , <i>3</i> , 13765.<br>[Zn(H <sub>2</sub> O) <sub>6</sub> ][Cu(H <sub>2</sub> O)C <sub>12</sub> H <sub>12</sub> O <sub>8</sub> ] <sub>2</sub> |
| KIZTIY | 2.095 Å | Qi, C.-M.; Li, Q.; Liang, S.-W.; Wang, M.; Xiong, L.-Q. <i>Z. Anorg. Allg. Chem.</i> <b>2014</b> , <i>640</i> , 159.<br>[Zn(H <sub>2</sub> O) <sub>6</sub> ](C <sub>12</sub> H <sub>11</sub> N <sub>2</sub> O <sub>4</sub> ) <sub>2</sub> ·6H <sub>2</sub> O                                                                                      |
| ONEHEV | 2.095 Å | Tian, L.; Niu, Z.; Yang, N.; Zou, J.-F. <i>Inorg. Chim. Acta</i> <b>2011</b> , <i>370</i> , 230. [Zn(H <sub>2</sub> O) <sub>6</sub> ][Zn <sub>2</sub> C <sub>30</sub> H <sub>26</sub> N <sub>12</sub> O <sub>14</sub> ]·2H <sub>2</sub> O                                                                                                         |
| SIDJIZ | 2.095 Å | Sun, R.; Li, Y.-Z.; Bai, J.; Pan, Y. <i>Cryst. Growth Des.</i> <b>2007</b> , <i>7</i> , 890. [Zn(H <sub>2</sub> O) <sub>6</sub> ][Zn <sub>2</sub> C <sub>30</sub> H <sub>36</sub> N <sub>6</sub> O <sub>24</sub> ]·3H <sub>2</sub> O                                                                                                              |
| WABJUG | 2.095 Å | Gharagozlou, M.; Langer, V.; Nemati, A. <i>Acta Crystallogr., Sect. E</i> <b>2010</b> , <i>66</i> , m1606.<br>[Zn(H <sub>2</sub> O) <sub>6</sub> ][Zn(C <sub>7</sub> H <sub>4</sub> NO <sub>4</sub> ) <sub>3</sub> ] <sub>2</sub>                                                                                                                 |
| ZADTIK | 2.095 Å | An, H.; Wang, L.; Hu, Y.; Xu, T.; Hou, Y. <i>Inorg. Chem.</i> <b>2016</b> , <i>55</i> , 144. [Zn(H <sub>2</sub> O) <sub>6</sub> ](4-HOOCCHCH-C <sub>5</sub> H <sub>5</sub> N) <sub>4</sub> ·[H <sub>4</sub> Co <sub>2</sub> Mo <sub>10</sub> O <sub>38</sub> ]·5H <sub>2</sub> O                                                                  |
| 11439  | 2.096 Å | Ayer, G. B.; Klepov, V. V.; Smith, M. D.; zur Loye, H.-C. <i>Inorg. Chem.</i> <b>2019</b> , <i>58</i> , 13049.<br>Cs <sub>2</sub> [Zn(H <sub>2</sub> O) <sub>6</sub> ][Hf <sub>2</sub> F <sub>12</sub> ]                                                                                                                                          |
| 15367  | 2.096 Å | Ferrari, A.; Braibanti, A.; Lanfredi, A. M. M.; Tiripicchio, A. <i>Acta Crystallogr.</i> <b>1967</b> , <i>22</i> , 240.<br>[Zn(H <sub>2</sub> O) <sub>6</sub> ](NO <sub>3</sub> ) <sub>2</sub>                                                                                                                                                    |
| 29827  | 2.096 Å | Liu, Y.; Deng, J.-X.; Pan, C.-Y. <i>J. Cluster Sci.</i> <b>2021</b> , <i>32</i> , 469. [Zn(H <sub>2</sub> O) <sub>6</sub> ](NO <sub>3</sub> ) <sub>2</sub> ·<br>[Zn(B <sub>3</sub> O <sub>3</sub> (OH) <sub>4</sub> ) <sub>2</sub> ](H <sub>2</sub> O) <sub>4</sub> ·2H <sub>2</sub> O                                                            |
| 77309  | 2.096 Å | Mostafa, G.; Ray, S.; Mukhopadhyay, A. <i>Z. Kristallogr.</i> <b>1996</b> , <i>211</i> , 373. [Zn(H <sub>2</sub> O) <sub>6</sub> ][TiF <sub>6</sub> ]                                                                                                                                                                                             |
| 162318 | 2.096 Å | Bosi, F.; Belardi, G.; Ballirano, P. <i>Am. Mineral.</i> <b>2009</b> , <i>94</i> , 74. K <sub>2</sub> [Zn(H <sub>2</sub> O) <sub>6</sub> ](SO <sub>4</sub> ) <sub>2</sub>                                                                                                                                                                         |
| 409722 | 2.096 Å | Euler, H.; Barbier, B.; Meents, A.; Kirfel, A. <i>Z. Kristallogr.-New Cryst. Struct.</i> <b>2003</b> , <i>218</i> , 265.<br>Rb <sub>2</sub> [Zn(H <sub>2</sub> O) <sub>6</sub> ](SeO <sub>4</sub> ) <sub>2</sub>                                                                                                                                  |
| AMIHIQ | 2.096 Å | Liu, Y.; Deng, J.-X.; Pan, C.-Y. <i>J. Cluster Sci.</i> <b>2021</b> , <i>32</i> , 469.<br>[Zn(H <sub>2</sub> O) <sub>6</sub> ](NO <sub>3</sub> ) <sub>2</sub> ·[Zn(H <sub>2</sub> O) <sub>4</sub> (B <sub>3</sub> H <sub>4</sub> O <sub>7</sub> ) <sub>2</sub> ]·2H <sub>2</sub> O                                                                |

|        |         |                                                                                                                                                                                                                                                                                                            |
|--------|---------|------------------------------------------------------------------------------------------------------------------------------------------------------------------------------------------------------------------------------------------------------------------------------------------------------------|
| DIWLUS | 2.096 Å | Li, G.-F.; Feng, X.; Peng, P. R.; Sun, Y.-L. <i>Z. Kristallogr.-New Cryst. Struct.</i> <b>2014</b> , <i>229</i> , 37. .<br>[Zn(H <sub>2</sub> O) <sub>6</sub> ](C <sub>7</sub> H <sub>6</sub> NO <sub>3</sub> ) <sub>2</sub>                                                                               |
| KUNJIN | 2.096 Å | Knöpe, K. E.; Cahill, C. L. <i>Eur. J. Inorg. Chem.</i> <b>2010</b> , 1177. [Zn(H <sub>2</sub> O) <sub>6</sub> ][(UO <sub>2</sub> ) <sub>2</sub> C <sub>4</sub> H <sub>4</sub> O <sub>12</sub> P <sub>2</sub> ] <sub>2</sub> ·4H <sub>2</sub> O                                                            |
| RENREI | 2.096 Å | Kumaresan, S.; Ramadevi, P.; Walsh, R. D.; McAneny, A.; Lake, C. H. <i>J. Chem. Sci.</i> <b>2006</b> , <i>118</i> , 243.<br>[Zn(H <sub>2</sub> O) <sub>6</sub> ](C <sub>7</sub> H <sub>6</sub> NO <sub>3</sub> S) <sub>2</sub>                                                                             |
| SAVLOR | 2.096 Å | Xu, L.; Liu, B.; Zheng, F.-K.; Guo, G.-C.; Huang, J.-S. <i>J. Solid State Chem.</i> <b>2005</b> , <i>178</i> , 3396.<br>[Zn(H <sub>2</sub> O) <sub>6</sub> ][Zn <sub>2</sub> C <sub>18</sub> H <sub>10</sub> O <sub>14</sub> ]                                                                             |
| 4309   | 2.097 Å | Whitnall, J.; Kennard, C. H. L.; Nimmo, J. K.; Moore, F. H. <i>Cryst. Struct. Commun.</i> <b>1975</b> , <i>4</i> , 717.<br>K <sub>2</sub> [Zn(H <sub>2</sub> O) <sub>6</sub> ](SO <sub>4</sub> ) <sub>2</sub>                                                                                              |
| 250994 | 2.097 Å | Simmons, C. J.; Stratemeier, H.; Hitchman, M. A.; Riley, M. J. <i>Inorg. Chem.</i> <b>2013</b> , <i>52</i> , 10481.<br>K <sub>2</sub> [Zn(H <sub>2</sub> O) <sub>6</sub> ](SeO <sub>4</sub> ) <sub>2</sub>                                                                                                 |
| 710001 | 2.097 Å | Euler, H.; Barbier, B.; Meents, A.; Kirfel, A. <i>Z. Kristallogr.-New Cryst. Struct.</i> <b>2009</b> , <i>224</i> , 351.<br>K <sub>2</sub> [Zn(H <sub>2</sub> O) <sub>6</sub> ](SeO <sub>4</sub> ) <sub>2</sub>                                                                                            |
| CUYZUS | 2.097 Å | Melegari, M.; Massera, C.; Ugozzoli, F.; Dalcanale, E. <i>CrystEngComm</i> <b>2010</b> , <i>12</i> , 2057.<br>[Zn(H <sub>2</sub> O) <sub>6</sub> ][ZnCl <sub>4</sub> ] <sub>2</sub> ·2C <sub>3</sub> H <sub>6</sub> O <sub>12</sub> P <sub>4</sub> ·5CF <sub>3</sub> CH <sub>2</sub> OH·5H <sub>2</sub> O  |
| DAYHOC | 2.097 Å | Naili, H. <i>J. Coord. Chem.</i> <b>2012</b> , <i>65</i> , 1178. [Zn(H <sub>2</sub> O) <sub>6</sub> ](C <sub>5</sub> H <sub>14</sub> N <sub>2</sub> )(SO <sub>4</sub> ) <sub>2</sub>                                                                                                                       |
| DIFDUR | 2.097 Å | Arranz-Mascaros, P.; Godino, M. L.; Lopez, R.; Cuesta, R.; Valenzuela-Calahorra, C.; Martín-Ramos, D. <i>Acta Crystallogr., Sect. C</i> <b>1999</b> , <i>55</i> , 2049. [Zn(H <sub>2</sub> O) <sub>6</sub> ](C <sub>7</sub> H <sub>8</sub> N <sub>5</sub> O <sub>4</sub> ) <sub>2</sub> ·2H <sub>2</sub> O |
| MAAPEZ | 2.097 Å | Rujiwatra, A.; Limtrakul, J. <i>Acta Crystallogr., Sect. E</i> <b>2005</b> , <i>61</i> , m1403.<br>H <sub>3</sub> NCH <sub>2</sub> CH <sub>2</sub> NH <sub>3</sub> [Zn(H <sub>2</sub> O) <sub>6</sub> ](SO <sub>4</sub> ) <sub>2</sub>                                                                     |
| XISGAK | 2.097 Å | Cariati, E.; Forni, A.; Lucenti, E.; Marinotto, D.; Previtali, A.; Righetto, S.; Botta, C.; Bold, V.; Kravtsov, V.; Fonar, M. S. <i>Chem. Asian J.</i> <b>2019</b> , <i>14</i> , 853. [Zn(H <sub>2</sub> O) <sub>6</sub> ](BF <sub>4</sub> ) <sub>2</sub> ·2C <sub>9</sub> H <sub>6</sub> N <sub>6</sub>   |
| CAXYUV | 2.098 Å | Cariati, F.; Erre, L.; Micera, G.; Panzanelli, A.; Ciani, G.; Sironi, A. <i>Inorg. Chim. Acta</i> <b>1983</b> , <i>80</i> , 57.<br>[Zn(H <sub>2</sub> O) <sub>6</sub> ](C <sub>6</sub> H <sub>4</sub> (OH) <sub>2</sub> (COO)) <sub>2</sub> ·2H <sub>2</sub> O                                             |
| DARMAO | 2.098 Å | Wu, Y.; Jiang, H.; Jiao, S.; Li, D.; Gao, Z.; Niu, B.; Wu, D.; Chen, S.; Cai, H.-L.; Wu, X. <i>Adv. Opt. Mater.</i> <b>2021</b> , 2101905. (C <sub>5</sub> H <sub>14</sub> N <sub>2</sub> ) <sub>2</sub> [Zn(H <sub>2</sub> O) <sub>6</sub> ](SO <sub>4</sub> ) <sub>3</sub>                               |
| DAYHIW | 2.098 Å | Naili, H. <i>J. Coord. Chem.</i> <b>2012</b> , <i>65</i> , 1178. [Zn(H <sub>2</sub> O) <sub>6</sub> ](C <sub>5</sub> H <sub>14</sub> N <sub>2</sub> )(SO <sub>4</sub> ) <sub>2</sub>                                                                                                                       |
| OHINUR | 2.098 Å | Aycan, Tugba, A. CCDC deposition number 1888931, <b>2020</b> .<br>[Zn(H <sub>2</sub> O) <sub>6</sub> ][Zn(H <sub>2</sub> O) <sub>4</sub> ](C <sub>6</sub> H <sub>6</sub> N <sub>2</sub> O)(SO <sub>4</sub> ) <sub>2</sub> ·2H <sub>2</sub> O                                                               |
| RUXPAE | 2.098 Å | Li, C.-P.; Long, W.-W.; Lei, Z.; Guo, L.; Xie, M.-J.; Lu, J.; Zhu, X.-D. <i>Chem. Commun.</i> <b>2020</b> , <i>56</i> , 12403.<br>[Zn(H <sub>2</sub> O) <sub>6</sub> ][Zn <sub>6</sub> C <sub>52</sub> H <sub>40</sub> N <sub>2</sub> O <sub>32</sub> ]                                                    |
| XETWAV | 2.098 Å | Thakuria, H.; Borah, B. M.; Das, G. <i>Eur. J. Inorg. Chem.</i> <b>2007</b> , 524. [Zn(H <sub>2</sub> O) <sub>6</sub> ][Zn <sub>2</sub> C <sub>12</sub> H <sub>12</sub> N <sub>2</sub> O <sub>12</sub> ] <sub>2</sub> ·3H <sub>2</sub> O                                                                   |



|          |         |                                                                                                                                                                                                                                                   |
|----------|---------|---------------------------------------------------------------------------------------------------------------------------------------------------------------------------------------------------------------------------------------------------|
| 39734    | 2.099 Å | Bukvetskii, B. V.; Gerasimenko, A. V.; Davidovich, R. L.; Kaidalova, T. A.; Teplukhina, L. V. <i>Koord. Khim.</i> <b>1993</b> , <i>19</i> , 526. $K_2[Zn(H_2O)_6][ZrF_6]$                                                                         |
| DAXDEN   | 2.099 Å | Hou, Y.; Rodriguez, M. A.; Nyman, M. <i>Cryst. Growth Des.</i> <b>2012</b> , <i>12</i> , 1422. $[Zn(H_2O)_6][Fe_4C_{26}H_{34}N_4O_{24}] \cdot 4.5H_2O$                                                                                            |
| DAYHIW01 | 2.099 Å | Wu, Y.; Jiang, H.; Jiao, S.; Li, D.; Gao, Z.; Niu, B.; Wu, D.; Chen, S.; Cai, H.-L.; Wu, X. <i>Adv. Opt. Mater.</i> <b>2021</b> , 2101905. $[Zn(H_2O)_6](C_5H_{14}N_2)(SO_4)_2$                                                                   |
| DAYHUI   | 2.099 Å | Naili, H. <i>J. Coord. Chem.</i> <b>2012</b> , <i>65</i> , 1178. $[Zn(H_2O)_6](C_5H_{14}N_2)(SO_4)_2$                                                                                                                                             |
| NUHSAL   | 2.099 Å | Indrani, M.; Ramasubramanian, R.; Fronczek, F. R.; Braga, D.; Vasanthacharya, N. Y.; Kumaresan, S. <i>J. Chem. Sci. Bangladore</i> <b>2009</b> , <i>121</i> , 413. $[Zn(H_2O)_6](2-OOC(CH_2)_2SC_5H_4NO)_2$                                       |
| SACVIE   | 2.099 Å | Wang, M.; Sun, W.; Pang, H.; Ma, H.; Yu, J.; Zhang, Z.; Niu, Y.; Yin, M. <i>J. Solid State Chem.</i> <b>2016</b> , <i>235</i> , 175. $[Zn(H_2O)_6][V_{10}Zn_2C_{16}H_{36}N_{12}O_{34}] \cdot 4H_2O$                                               |
| TUKHEO   | 2.099 Å | Dey, D.; Pal, S.; Yadav, H. R.; Sengupta, P. S.; Choudhury, A. R.; Kole, N.; Biswas, B. <i>RSC Adv.</i> <b>2015</b> , <i>5</i> , 42681. $[Zn(H_2O)_6]HSO_4)_2 \cdot 2H_2O$                                                                        |
| UGAFOZ   | 2.099 Å | Kammoun, O.; Rekek, W.; Bataille, T.; Mahmudov, K. T.; Kopylovich, M. N.; Naili, H. <i>J. Organometal. Chem.</i> <b>2013</b> , <i>741</i> , 136. $[Zn(H_2O)_6](C_7H_7N_2)_2(SO_4)_2 \cdot 4H_2O$                                                  |
| 94861    | 2.100 Å | Hitchman, M. A.; Yablokov, Y. V.; Petrashen, V. E.; Augustyniak-Jublokov, M. A.; Stratemeier, H.; Riley, M. J.; Lukaszewicz, K.; Tomaszewski, P. E.; Pietraszko, A. <i>Inorg. Chem.</i> <b>2002</b> , <i>41</i> , 229. $Cs_2[Zn(H_2O)_6]ZrF_6)_2$ |
| DEYTOS   | 2.100 Å | Chen, Z.; An, H.; Zhang, H.; Hu, Y. <i>CrystEngComm</i> <b>2013</b> , <i>15</i> , 4711. $[Zn(H_2O)_6][Mo_8C_{12}H_{30}N_4O_{30}] \cdot 4H_2O$                                                                                                     |
| DOFYUT   | 2.100 Å | Gao, Y.-Q.; Gu, W.; Sun, X.-P.; Liu, X.; Liao, D.-Z. <i>Z. Anorg. Allg. Chem.</i> <b>2008</b> , <i>634</i> , 1961. $[Zn(H_2O)_6]_2[V_2C_{10}H_{12}N_2O_{16}P_2] \cdot 2H_2O$                                                                      |
| EQIXUX   | 2.100 Å | Yang; B.-P.; Mao; J.-G.; Sun; Y.-Q.; Zhao, H.-H.; Clearfield, A. <i>Eur. J. Inorg. Chem.</i> <b>2003</b> , 4211. $[Zn(H_2O)_6]_2[Zn_7C_{36}H_{54}N_6O_{30}P_6] \cdot 16H_2O$                                                                      |
| POCMUR   | 2.100 Å | Zviedre, I.; Belyakov, S.; Zarina, I. <i>Z. Kristallogr.-New Cryst. Struct.</i> <b>2009</b> , <i>224</i> , 627. $[Zn(H_2O)_6](BC_{12}H_{12}O_{14})_2 \cdot 2H_2O$                                                                                 |
| XESFUW   | 2.100 Å | Arnold, P. J.; Davies, S. C.; Dilworth, J. R.; Durrant, M. C.; Griffiths, D. V.; Hughes, D. L.; Richards, R. L.; Sharpe, P. C. <i>J. Chem. Soc., Dalton Trans.</i> <b>2001</b> , 736. $[Zn(H_2O)_6][ZnC_{16}H_{20}N_4O_3]_2(SO_4)_3 \cdot 3H_2O$  |
| ARAXEV   | 2.101 Å | Yang; Y.-Y.; Szeto; L.; Wong, W.-T. <i>Appl. Organomet. Chem.</i> <b>2003</b> , <i>17</i> , 958. $[Zn(H_2O)_6][ZnC_{17}H_8O_{10}] \cdot 4H_2O$                                                                                                    |
| OCETOG   | 2.101 Å | Xu; L.; Liu; B.; Guo; G.; Huang, J.-S. <i>Inorg. Chem. Commun.</i> <b>2006</b> , <i>9</i> , 220. $[Zn(H_2O)_6][Zn_5C_{36}H_{22}Na_2O_{30}] \cdot 6H_2O$                                                                                           |
| EXEHEV   | 2.101 Å | Croitor, L.; Coropceanu, E. B.; Siminel, A. V.; Kravtsov, V. C.; Fonari, M. S. <i>Cryst. Growth Des.</i> <b>2011</b> , <i>11</i> , 3536. $[Zn(H_2O)_6][Zn(H_2O)_3(SO_4)(C_{10}H_6N_2O_3)] \cdot [Zn(H_2O)_3(SO_4)(C_{10}H_8N_2O_3)]$              |

|          |         |                                                                                                                                                                                                                                                                                                                                                                                                                    |
|----------|---------|--------------------------------------------------------------------------------------------------------------------------------------------------------------------------------------------------------------------------------------------------------------------------------------------------------------------------------------------------------------------------------------------------------------------|
| EXEHEV01 | 2.101 Å | Zhu, K.; Gao, Y.; Li, G. <i>Synth. React. Inorg., Met.-Org., Nano-Met. Chem.</i> <b>2011</b> , <i>41</i> , 785. [Zn(H <sub>2</sub> O) <sub>6</sub> ][Zn(H <sub>2</sub> O) <sub>3</sub> (SO <sub>4</sub> )(C <sub>10</sub> H <sub>6</sub> N <sub>2</sub> O <sub>3</sub> )] <sub>2</sub> ·[Zn(H <sub>2</sub> O) <sub>3</sub> (SO <sub>4</sub> )(C <sub>10</sub> H <sub>8</sub> N <sub>2</sub> O <sub>3</sub> )]      |
| EXEHEV02 | 2.102 Å | Xu, X.-T.; Bai, F.-Y.; Zou, W.; Xing, Y.-H. <i>J. Inorg. Organomet. Polym. Mater.</i> <b>2014</b> , <i>24</i> , 450. [Zn(H <sub>2</sub> O) <sub>6</sub> ][Zn(H <sub>2</sub> O) <sub>3</sub> (SO <sub>4</sub> )(C <sub>10</sub> H <sub>6</sub> N <sub>2</sub> O <sub>3</sub> )] <sub>2</sub> ·[Zn(H <sub>2</sub> O) <sub>3</sub> (SO <sub>4</sub> )(C <sub>10</sub> H <sub>8</sub> N <sub>2</sub> O <sub>3</sub> )] |
| IVOPOZ   | 2.102 Å | Qin, X.; Chen, W.-J.; Zhang, Y.-Q.; Zhu, Q.-J.; Xue, S.-F.; Tao, Z. <i>J. Mol. Struct.</i> <b>2011</b> , <i>996</i> , 12. [Zn(H <sub>2</sub> O) <sub>6</sub> ] <sub>2</sub> (SO <sub>4</sub> ) <sub>2</sub> ·C <sub>44</sub> H <sub>48</sub> N <sub>24</sub> O <sub>12</sub> ·10H <sub>2</sub> O                                                                                                                   |
| UWILEU   | 2.102 Å | Fonari, M. S.; Kravtsov, V. C.; Bold, V.; Lucenti, E.; Cariati, E.; Marinotto, D.; Forni, A. <i>Cryst. Growth Des.</i> <b>2021</b> , <i>21</i> , 4184. [Zn(H <sub>2</sub> O) <sub>6</sub> ](NO <sub>3</sub> ) <sub>2</sub> ·2C <sub>9</sub> H <sub>6</sub> N <sub>6</sub>                                                                                                                                          |
| ALEDEA   | 2.104 Å | Lei, C.; Mao, J.-G.; Sun, Y.-Q.; Zeng H.-Y.; Clearfield, A. <i>Inorg. Chem.</i> <b>42</b> , <b>2003</b> , 6157. [Zn(H <sub>2</sub> O) <sub>6</sub> ] <sub>2</sub> [Zn <sub>7</sub> C <sub>24</sub> H <sub>42</sub> N <sub>6</sub> O <sub>30</sub> P <sub>6</sub> ] <sub>2</sub> ·22H <sub>2</sub> O                                                                                                                |
| GIWPOT   | 2.104 Å | Xu, B.; Cai, Y.; Li, L.; Zhang, Z.; Li, C. <i>J. Mol. Struct.</i> <b>2014</b> , <i>1059</i> , 320. [Zn(H <sub>2</sub> O) <sub>6</sub> ][PbC <sub>9</sub> H <sub>3</sub> O <sub>6</sub> ] <sub>2</sub>                                                                                                                                                                                                              |
| KENYIP   | 2.104 Å | Sun, C.; Hu, J.; Deng, C. <i>Inorg. Chem. Commun.</i> <b>2022</b> , <i>144</i> , 109938. [Zn(H <sub>2</sub> O) <sub>6</sub> ][ZnC <sub>17</sub> H <sub>15</sub> N <sub>2</sub> O <sub>12</sub> ] <sub>2</sub> ·4H <sub>2</sub> O                                                                                                                                                                                   |
| LADMOV   | 2.104 Å | Coropceanu, E. B.; Croitor, L.; Siminel, A. V.; Chumakov, Y.; Fonari, M.S. <i>Polyhedron</i> <b>2016</b> , <i>109</i> , 107. [Zn(H <sub>2</sub> O) <sub>6</sub> ][Zn <sub>2</sub> C <sub>20</sub> H <sub>24</sub> F <sub>8</sub> N <sub>4</sub> O <sub>4</sub> ][Zn <sub>3</sub> C <sub>30</sub> H <sub>24</sub> F <sub>8</sub> N <sub>6</sub> ] <sub>2</sub> ·SiF <sub>6</sub> ·2H <sub>2</sub> O                 |
| REDRUO   | 2.104 Å | He, J.; Yin, Y.-G.; Huang, X.-C.; Li, D. <i>Inorg. Chem. Commun.</i> <b>2006</b> , <i>9</i> , 205. [Zn(H <sub>2</sub> O) <sub>6</sub> ][Zn <sub>2</sub> C <sub>27</sub> H <sub>27</sub> N <sub>4</sub> O <sub>7</sub> S] <sub>2</sub> ·0.75CH <sub>3</sub> OH·3H <sub>2</sub> O                                                                                                                                    |
| HULMOQ   | 2.104 Å | Rodriguez-Martin, Y.; Sanchiz, J.; Ruiz-Perez, C.; Lloret, F.; Julve, M. <i>CrystEngComm</i> <b>2002</b> , <i>4</i> , 631. [Zn(H <sub>2</sub> O) <sub>6</sub> ][Cu(C <sub>3</sub> H <sub>2</sub> O <sub>4</sub> ) <sub>2</sub> (H <sub>2</sub> O) <sub>2</sub> ]                                                                                                                                                   |
| TUGCOQ   | 2.105 Å | Liu, J.; Lu, Y.; Lu, W. <i>Dalton Trans.</i> <b>2020</b> , <i>49</i> , 4044. [Zn(H <sub>2</sub> O) <sub>6</sub> ][ZnC <sub>10</sub> H <sub>10</sub> O <sub>12</sub> ] <sub>2</sub> ·C <sub>26</sub> H <sub>20</sub> N <sub>2</sub> O <sub>4</sub> ·4H <sub>2</sub> O                                                                                                                                               |
| 250492   | 2.106 Å | Liu, B.; Jia, Y.-Y.; Yang, H.-Q.; Yang, J.-H.; Xue, G.-L. <i>Dalton Trans.</i> <b>2013</b> , <i>42</i> , 16742. K[Zn(H <sub>2</sub> O) <sub>6</sub> ][Zn(H <sub>2</sub> O) <sub>2</sub> Ru <sub>2</sub> (CO <sub>3</sub> ) <sub>4</sub> Cl <sub>2</sub> ] <sub>2</sub> ·4H <sub>2</sub> O                                                                                                                          |
| XOKKEQ   | 2.106 Å | Larionov, S. V.; Rakhmanova, M. I.; Glinskaya, L. A.; Naumov, D. Y.; Vinogradov, A. S.; Karpov, V. M.; Platonov, V. E.; Fadeeva, V. P. <i>Zh. Obshch. Khim.</i> <b>2019</b> , <i>89</i> , 261. [Zn(H <sub>2</sub> O) <sub>6</sub> ][Zn(H <sub>2</sub> O) <sub>4</sub> (C <sub>14</sub> F <sub>8</sub> O <sub>4</sub> ) <sub>2</sub> ] <sub>2</sub> ·2H <sub>2</sub> O                                              |
| 16591    | 2.107 Å | Montgomery, H.; Lingafelter, E. C. <i>Acta Crystallogr.</i> <b>1964</b> , <i>17</i> , 1295. (NH <sub>4</sub> ) <sub>2</sub> [Zn(H <sub>2</sub> O) <sub>6</sub> ](SO <sub>4</sub> ) <sub>2</sub>                                                                                                                                                                                                                    |
| 41708    | 2.107 Å | Spiess, M.; Gruehn, R. <i>Z. Anorg. Allg. Chem.</i> <b>1979</b> , <i>456</i> , 222. [Zn(H <sub>2</sub> O) <sub>6</sub> ]SO <sub>4</sub>                                                                                                                                                                                                                                                                            |
| SILCOI   | 2.107 Å | Chi-Duran, I.; Enriquez, J.; Vega, A.; Herrera, F.; Pratap Singh, D. <i>Acta Crystallogr., Sect. E</i> <b>2018</b> , <i>74</i> , 1231. [Zn(H <sub>2</sub> O) <sub>6</sub> ](NO <sub>3</sub> ) <sub>2</sub> ·2C <sub>6</sub> H <sub>5</sub> N <sub>5</sub>                                                                                                                                                          |
| TIQWEY   | 2.107 Å | Wang, X.; Feng, J.; Zhao, Y.-D.; Zhang, X.-F.; Yan, T.; Wang, Q.; Du, L.; Zhao, Q.-H. <i>Inorg. Chem. Commun.</i> <b>2018</b> , <i>98</i> , 80. [Zn(H <sub>2</sub> O) <sub>6</sub> ](NO <sub>3</sub> ) <sub>2</sub> ·(1,2,4,5-(CH <sub>2</sub> -NC <sub>5</sub> H <sub>4</sub> -4-COO) <sub>4</sub> -C <sub>6</sub> H <sub>2</sub> ) <sub>4</sub> ·H <sub>2</sub> O                                                |
| ZNAQBS   | 2.107 Å | Broomhead, J. M.; Nicol, A. D. I. <i>Acta Crystallogr.</i> <b>1948</b> , <i>1</i> , 88. [Zn(H <sub>2</sub> O) <sub>6</sub> ](C <sub>6</sub> H <sub>5</sub> SO <sub>3</sub> ) <sub>2</sub>                                                                                                                                                                                                                          |
| 15981    | 2.108 Å | Yue, S. H.; Beevers, C. A. <i>Z. Kristallogr.</i> <b>1936</b> , <i>95</i> , 426. [Zn(H <sub>2</sub> O) <sub>6</sub> ](BrO <sub>3</sub> ) <sub>2</sub>                                                                                                                                                                                                                                                              |
| MUTLEU   | 2.111 Å | Rousseau, G.; Zhang, S.; Oms, O.; Dolbecq, A.; Marrot, J.; Liu, R.; Shang, X.; Zhang, G.; Keita, B.; Mialane, P. <i>Chem. Eur. J.</i> <b>2015</b> , <i>21</i> , 12153. K <sub>3</sub> Na <sub>7</sub> [Zn(H <sub>2</sub> O) <sub>6</sub> ][Zn <sub>2</sub> Co <sub>7</sub> W <sub>18</sub> C <sub>20</sub> H <sub>48</sub> N <sub>4</sub> P <sub>6</sub> ] <sub>2</sub> ·32H <sub>2</sub> O                        |

|             |                               |                                                                                                                                                                                                                                                                                                                                      |
|-------------|-------------------------------|--------------------------------------------------------------------------------------------------------------------------------------------------------------------------------------------------------------------------------------------------------------------------------------------------------------------------------------|
| EMIVON      | 2.112 Å                       | Li, P.-X.; Wang, M.-S.; Guo, G.-C. <i>Cryst. Growth Des.</i> <b>2016</b> , <i>16</i> , 3709. [Zn(H <sub>2</sub> O) <sub>6</sub> ](1,4-(OOC) <sub>2</sub> C <sub>6</sub> H <sub>4</sub> ) <sub>2</sub> ·2(C <sub>12</sub> H <sub>10</sub> N <sub>2</sub> O <sub>2</sub> ) <sub>2</sub> ·2H <sub>2</sub> O                             |
| WITQEY      | 2.112 Å                       | Miao, S. B.; Xu, C. Y.; Ji, B. M. <i>Zh. Strukt. Khim.</i> <b>2018</b> , <i>59</i> , 1456. [Zn(H <sub>2</sub> O) <sub>6</sub> ][ZnC <sub>19</sub> H <sub>15</sub> N <sub>6</sub> O <sub>8</sub> ] <sub>2</sub> ·2H <sub>2</sub> O                                                                                                    |
| 28          | 2.115 Å                       | Zloczysti, S.; Hartl, H.; Frydrych, R. <i>Acta Crystallogr., Sect. B</i> <b>1976</b> , <i>32</i> , 7538. [Zn(H <sub>2</sub> O) <sub>6</sub> ][Pb(IO <sub>3</sub> ) <sub>6</sub> ]                                                                                                                                                    |
| HAHKUX      | 2.118 Å                       | Worl, S.; Hellwinkel, D.; Pritzkow, H.; Hofmann, M.; Kramer, R. <i>Dalton Trans.</i> <b>2004</b> , 2750. [Zn(H <sub>2</sub> O) <sub>6</sub> ][ZnC <sub>21</sub> H <sub>14</sub> NO <sub>7</sub> ] <sub>2</sub> ·2H <sub>2</sub> O                                                                                                    |
| 141393      | 2.122 Å                       | Colliard, I.; Morrison, G.; zur Loye, H.-C.; Nyman, M. <i>J. Am. Chem. Soc.</i> <b>2020</b> , <i>142</i> , 9039. (Zn(H <sub>2</sub> O) <sub>6</sub> ) <sub>3.5</sub> [Zn <sub>2.5</sub> U <sub>70</sub> (OH) <sub>36</sub> O <sub>64</sub> ](SO <sub>4</sub> ) <sub>64</sub> (H <sub>2</sub> O) <sub>54.5</sub> ·145H <sub>2</sub> O |
| 280218      | 2.125 Å                       | Bennett, M. V.; Shores, M. P.; Beauvais, L. G.; Long, J. R. <i>J. Am. Chem. Soc.</i> <b>2000</b> , <i>122</i> , 6664. [Zn(H <sub>2</sub> O) <sub>6</sub> ]Zn <sub>3</sub> [Re <sub>6</sub> S <sub>8</sub> (CN) <sub>6</sub> ] <sub>2</sub> ·18H <sub>2</sub> O                                                                       |
| 143823      | 2.128 Å                       | Colliard, I.; Nyman, M. <i>Angew. Chem, Int. Ed.</i> <b>2021</b> , <i>60</i> , 7308. [Zn(H <sub>2</sub> O) <sub>6</sub> ]Ce <sub>2.5</sub> [Ce <sub>70</sub> (OH) <sub>36</sub> O <sub>64</sub> (SO <sub>4</sub> ) <sub>64</sub> (H <sub>2</sub> O) <sub>58.5</sub> ] <sub>2</sub> 55.5·H <sub>2</sub> O                             |
| 84605       | 2.129 Å                       | Ghosh, S.; Mukherjee, M.; Seal, A.; Ray, S. <i>Acta Crystallogr., Sect. B</i> <b>1997</b> , <i>53</i> , 639. [Zn(H <sub>2</sub> O) <sub>6</sub> ](ClO <sub>4</sub> ) <sub>2</sub>                                                                                                                                                    |
| 710062      | 2.135 Å                       | Liu, H. <i>Z. Kristallogr.-New Cryst. Struct.</i> <b>2011</b> , <i>226</i> , 441. (NH <sub>4</sub> ) <sub>2</sub> [Zn(H <sub>2</sub> O) <sub>6</sub> ][MoW <sub>12</sub> O <sub>40</sub> ] <sub>2</sub> ·4NH <sub>3</sub> ·36H <sub>2</sub> O                                                                                        |
| LATNOM      | 2.143 Å                       | Sohmiya, A.; Okuyama, T.; Suzuki, R.; Yamanishi, K.; Sugimoto, K.; Kondo, M. <i>Chem. Lett.</i> <b>2017</b> , <i>46</i> , 485. [Zn(H <sub>2</sub> O) <sub>6</sub> ][Zn(H <sub>2</sub> O) <sub>2</sub> (C <sub>23</sub> H <sub>14</sub> Cl <sub>4</sub> O <sub>12</sub> ) <sub>2</sub> ·9H <sub>2</sub> O]                            |
| WURWIR      | 2.152 Å                       | Li, S. H.; Fu, W. J. <i>Asian J. Chem.</i> <b>2014</b> , <i>26</i> , 3665. [Zn(H <sub>2</sub> O) <sub>6</sub> ](C <sub>9</sub> H <sub>4</sub> NO <sub>8</sub> ) <sub>2</sub> ·4H <sub>2</sub> O                                                                                                                                      |
| 415706      | 2.158 Å                       | Meyer, G.; Nolte, M.; Berners, R. <i>Z. Anorg. Allg. Chem.</i> <b>2006</b> , <i>632</i> , 2184. [Zn(H <sub>2</sub> O) <sub>6</sub> ][(Hg <sub>2</sub> ) <sub>3</sub> (OH) <sub>2</sub> ](NO <sub>3</sub> ) <sub>6</sub>                                                                                                              |
| IGOZEL      | 2.183 Å                       | Wang, Y.; Wang, X.-G.; Yuan, B.; Shao, C.-Y.; Chen, Y.-Y.; Zhou, B.-B.; Li, M.-S.; An, X.-M.; Cheng, P.; Zhao, X.-J. <i>Inorg. Chem.</i> <b>2015</b> , <i>54</i> , 4456. [Zn(H <sub>2</sub> O) <sub>6</sub> ][CdYbC <sub>12</sub> H <sub>12</sub> O <sub>15</sub> ] <sub>2</sub> ·1.5H <sub>2</sub> O                                |
| <b>Mean</b> | <b>2.088 Å/266 structures</b> |                                                                                                                                                                                                                                                                                                                                      |

**Table S1bb.** Summary of solid state structures containing hydrated cadmium(II) ions. The ICSD/CDS code refers to the code in the Inorganic Crystal Structure Database (ICSD, number) and Cambridge Structure Database (CSD, letters), respectively, and the mean Cd-O bond distance,  $d(\text{Cd-O})$ ;  $d(\text{Cd-O})_b$  denotes bridging ligands and  $d(\text{Cd-O})_t$  terminal ligands. Data in purple text are not included in the mean distance as they are uncertain or differ significantly from the mean value.

### Cadmium(II)

*Four-coordination, distorted tetrahedral configuration*

| ICSD/CSD coded | $d(\text{Cd-O})$ | Reference, compound formula                                                                                                                                                                |
|----------------|------------------|--------------------------------------------------------------------------------------------------------------------------------------------------------------------------------------------|
| ODIXIK         | 2.351 Å          | Zhang, M.; Chen, Y.-P.; Zhou, H.-C. <i>CrystEngComm</i> <b>2013</b> , <i>15</i> , 9544. $[\text{Cd}(\text{H}_2\text{O})_4][\text{Cd}_3\text{Si}_2\text{C}_{56}\text{H}_{32}\text{O}_{16}]$ |

*Six-coordination, octahedral configuration*

| ICSD/CSD coded | $d(\text{Cd-O})$ | Reference, compound formula                                                                                                                                                                                                                                                                                                                                                                                                                                                                                                             |
|----------------|------------------|-----------------------------------------------------------------------------------------------------------------------------------------------------------------------------------------------------------------------------------------------------------------------------------------------------------------------------------------------------------------------------------------------------------------------------------------------------------------------------------------------------------------------------------------|
| ZETFUZ         | 2.199 Å          | Ka-Luo, T.; Xiang-Lin, J.; Shao-Juan, J.; You-Qi, T. <i>Chinese J. Struct. Chem.</i> <b>1995</b> , <i>14</i> , 399. $[\text{Cd}(\text{H}_2\text{O})_6][\text{CdC}_{72}\text{H}_{60}\text{Cl}_4\text{S}_{13}]$<br>Cheng-Peng Li, Qian Yu, Jing Chen, Miao Du Wang, X.-G.; Yuan, B.; Shao, C.-Y.; Chen, Y.-Y.; Zhou, B.-B.; Li, M.-S.; An, X.-M.; Cheng, P.; Zhao, X.-J. <i>Inorg. Chem.</i> <b>2015</b> , <i>54</i> , 4456. $[\text{Cd}(\text{H}_2\text{O})_6][\text{CdYbC}_{12}\text{H}_{12}\text{O}_{15}]_2 \cdot 3\text{H}_2\text{O}$ |
| XEVGUC         | 2.228 Å          | Ma, J.-X.; Huang, X.-F.; Song, X.-Q.; Liu, W.-S. <i>Chem. Eur. J.</i> <b>2013</b> , <i>19</i> , 3590. $[\text{Cd}(\text{H}_2\text{O})_6][\text{CdGd}(\text{C}_4\text{H}_4\text{O}_5)_3]_2 \cdot \text{H}_2\text{O}$                                                                                                                                                                                                                                                                                                                     |
| QUPPOH         | 2.231 Å          | Cheng-Peng Li, Qian Yu, Jing Chen, Miao Du, M. <i>Cryst. Growth Des.</i> <b>2010</b> , <i>10</i> , 2650. $[\text{Cd}(\text{H}_2\text{O})_6][\text{Cd}_2\text{C}_{40}\text{H}_{34}\text{N}_8\text{O}_{22}\text{S}_3]_2 \cdot 10\text{H}_2\text{O}$                                                                                                                                                                                                                                                                                       |
| DOJWUW         | 2.232 Å          | Yang, B.; Xiao, X.; Zhang, Y.-Q.; Zhu, Q.-J.; Xue, S.-F.; Tao, Z.; Wei, G. <i>RSC Adv.</i> <b>2014</b> , <i>4</i> , 44359. $[\text{Cd}(\text{H}_2\text{O})_6](\text{C}_{13}\text{H}_{21}\text{N}_2)_2[\text{CdCl}_4]_2 \cdot 2\text{C}_{40}\text{H}_{44}\text{N}_{24}\text{O}_{12} \cdot 2\text{H}_2\text{O}$                                                                                                                                                                                                                           |
| KOMJON         | 2.234 Å          | Huang, X.-F.; Ma, J.-X.; Liu, W.-S. <i>Inorg. Chem.</i> <b>2014</b> , <i>53</i> , 5922. $[\text{Cd}(\text{H}_2\text{O})_6][\text{CdEr}(\text{C}_4\text{H}_4\text{O}_5)_3]_2 \cdot 12\text{H}_2\text{O}$                                                                                                                                                                                                                                                                                                                                 |
| WEJDAT         | 2.236 Å          | Tang X.-Y.; Yu, H.; Gao, B.-B.; Lang, J.-P. <i>Dalton Trans.</i> <b>2017</b> , <i>46</i> , 14724. $[\text{Cd}(\text{H}_2\text{O})_6][\text{Cd}_6\text{Hg}_2\text{C}_{108}\text{H}_{100}\text{Cl}_6\text{N}_{16}\text{O}_{24}\text{S}_4] \cdot 10(\text{CH}_3)_2\text{NCHO} \cdot 12\text{H}_2\text{O}$                                                                                                                                                                                                                                  |
| KOLVAK         | 2.241 Å          | Huang, X.-F.; Ma, J.-X.; Liu, W.-S. <i>Inorg. Chem.</i> <b>2014</b> , <i>53</i> , 5922. $[\text{Cd}(\text{H}_2\text{O})_6][\text{CdLu}(\text{C}_4\text{H}_4\text{O}_5)_3]_2 \cdot 12\text{H}_2\text{O}$                                                                                                                                                                                                                                                                                                                                 |
| TUWPOR         | 2.243 Å          | Singh, W. M.; Baruah, J. B. <i>Polyhedron</i> <b>2010</b> , <i>29</i> , 1543. $[\text{Cd}(\text{H}_2\text{O})_6][\text{Cd}_3\text{C}_{56}\text{H}_{48}\text{O}_{28}] \cdot 7\text{H}_2\text{O}$                                                                                                                                                                                                                                                                                                                                         |
| KOLTUC         | 2.247 Å          | Huang, X.-F.; Ma, J.-X.; Liu, W.-S. <i>Inorg. Chem.</i> <b>2014</b> , <i>53</i> , 5922. $[\text{Cd}(\text{H}_2\text{O})_6][\text{CdTm}(\text{C}_4\text{H}_4\text{O}_5)_3]_2 \cdot 12\text{H}_2\text{O}$                                                                                                                                                                                                                                                                                                                                 |
| KOMJED         | 2.250 Å          | Huang, X.-F.; Ma, J.-X.; Liu, W.-S. <i>Inorg. Chem.</i> <b>2014</b> , <i>53</i> , 5922. $[\text{Cd}(\text{H}_2\text{O})_6][\text{CdDy}(\text{C}_4\text{H}_4\text{O}_5)_3]_2 \cdot 6\text{H}_2\text{O}$                                                                                                                                                                                                                                                                                                                                  |
| ZADTOQ         | 2.252 Å          | An, H.; Wang, L.; Hu, Y.; Xu, T.; Hou, Y. <i>Inorg. Chem.</i> <b>2016</b> , <i>55</i> , 144. $[\text{Cd}(\text{H}_2\text{O})_6](\text{SO}_4)_4[\text{H}_4\text{Co}_2\text{Mo}_{10}\text{O}_{38}] \cdot 5\text{H}_2\text{O}$                                                                                                                                                                                                                                                                                                             |

|          |         |                                                                                                                                                                                                                                                                                                                                    |
|----------|---------|------------------------------------------------------------------------------------------------------------------------------------------------------------------------------------------------------------------------------------------------------------------------------------------------------------------------------------|
| TUXLEE   | 2.254 Å | Barszcz, B.; Hodorowicz, M.; Jablonska-Wawrzycka, A.; Masternak, J.; Nitek, W.; Stadnicka, K. <i>Polyhedron</i> <b>2010</b> , <i>29</i> , 1191. [Cd(H <sub>2</sub> O) <sub>6</sub> ](C <sub>8</sub> H <sub>8</sub> NO <sub>2</sub> ) <sub>4</sub> [CdC <sub>21</sub> H <sub>12</sub> N <sub>3</sub> O <sub>12</sub> ] <sub>2</sub> |
| GIYCUN   | 2.257 Å | Custelcean, R.; Remy, P.; Bonnesen, P. V.; Jiang, D.-E.; Moyer, B. A. <i>Angew. Chem., Int. Ed.</i> <b>2008</b> , <i>47</i> , 1866. [Cd(H <sub>2</sub> O) <sub>6</sub> ]SO <sub>4</sub> ·2(C <sub>24</sub> H <sub>30</sub> N <sub>10</sub> O <sub>3</sub> )                                                                        |
| KOMJIH   | 2.257 Å | Huang, X.-F.; Ma, J.-X.; Liu, W.-S. <i>Inorg. Chem.</i> <b>2014</b> , <i>53</i> , 5922. [Cd(H <sub>2</sub> O) <sub>6</sub> ][CdHo(C <sub>4</sub> H <sub>4</sub> O <sub>5</sub> ) <sub>3</sub> ] <sub>2</sub> ·12H <sub>2</sub> O                                                                                                   |
| OJIKOH   | 2.257 Å | Jin-Sen Zhou; Ji-Wen Cai; Ng, S. W., <i>Acta Crystallogr., Sect. E</i> <b>2003</b> , <i>59</i> , o1185.                                                                                                                                                                                                                            |
| XEVGOW   | 2.257 Å | Ma, J.-X.; Huang, X.-F.; Song, X.-Q.; Liu, W.-S. <i>Chem. Eur. J.</i> <b>2013</b> , <i>19</i> , 3590. [Cd(H <sub>2</sub> O) <sub>6</sub> ][CdTb(C <sub>4</sub> H <sub>4</sub> O <sub>5</sub> ) <sub>3</sub> ] <sub>2</sub> ·H <sub>2</sub> O                                                                                       |
| XUBLAI01 | 2.257 Å | Kumar, S.; Sharma, R. P.; Venugopalan, P.; Aree, T. <i>Polyhedron</i> <b>2018</b> , <i>139</i> , 178. [Cd(H <sub>2</sub> O) <sub>6</sub> ](C <sub>6</sub> H <sub>2</sub> N <sub>3</sub> O <sub>7</sub> ) <sub>2</sub> ·2H <sub>2</sub> O                                                                                           |
| XUBLAI   | 2.258 Å | Natarajan, S.; Moovendaran, K.; Dhas, S. A. M. B.; Suresh, J.; Lakshman, P. L.N. <i>Acta Crystallogr., Sect. E</i> <b>2009</b> , <i>65</i> , m620. [Cd(H <sub>2</sub> O) <sub>6</sub> ](C <sub>6</sub> H <sub>2</sub> N <sub>3</sub> O <sub>7</sub> ) <sub>2</sub> ·2H <sub>2</sub> O                                              |
| WANLOO   | 2.259 Å | Rajbanshi, A.; Custelcean, R. <i>Supramol. Chem.</i> <b>2012</b> , <i>24</i> , 65. [Cd(H <sub>2</sub> O) <sub>6</sub> ]CrO <sub>4</sub> ·2(C <sub>24</sub> H <sub>30</sub> N <sub>10</sub> O <sub>3</sub> )                                                                                                                        |
| YOSYUB   | 2.259 Å | Maldonado, C. R.; Quiros, M.; Salas, J. M.; Rodriguez-Dieguez, A. <i>Inorg. Chim. Acta</i> <b>2009</b> , <i>362</i> , 1553. [Cd(H <sub>2</sub> O) <sub>6</sub> ](C <sub>5</sub> H <sub>4</sub> N <sub>5</sub> O <sub>2</sub> ) <sub>2</sub>                                                                                        |
| UWILAQ   | 2.260 Å | Fonari, M. S.; Kravtsov, V. C.; Bold, V.; Lucenti, E.; Cariati, E.; Marinotto, D.; Forni, A. <i>Cryst. Growth Des.</i> <b>2021</b> , <i>21</i> , 4184. [Cd(H <sub>2</sub> O) <sub>6</sub> ][Cd(C <sub>9</sub> H <sub>6</sub> N <sub>6</sub> ) <sub>6</sub> ] <sub>2</sub> (ClO <sub>4</sub> ) <sub>6</sub> ·7H <sub>2</sub> O      |
| XIBXAH   | 2.260 Å | Moers, O.; Blaschette, A.; Jones, P. G. <i>Z. Allg. Anorg. Chem.</i> <b>2001</b> , <i>627</i> , 1611. [Cd(H <sub>2</sub> O) <sub>6</sub> ](C <sub>14</sub> H <sub>10</sub> NO <sub>8</sub> S <sub>2</sub> ) <sub>2</sub> ·2H <sub>2</sub> O                                                                                        |
| KIPYOZ   | 2.261 Å | Galstyan, A.; Miguel, P. J. S.; Weise, K.; Lippert, B. <i>Dalton Trans.</i> <b>2013</b> , <i>42</i> , 16151. [Cd(H <sub>2</sub> O) <sub>6</sub> ][Cd <sub>2</sub> Pt <sub>3</sub> C <sub>30</sub> H <sub>56</sub> N <sub>18</sub> O <sub>7</sub> ](SO <sub>4</sub> ) <sub>6</sub> ·15H <sub>2</sub> O                              |
| WANLUU   | 2.261 Å | Rajbanshi, A.; Custelcean, R. <i>Supramol. Chem.</i> <b>2012</b> , <i>24</i> , 65. [Cd(H <sub>2</sub> O) <sub>6</sub> ]SeO <sub>4</sub> ·2(C <sub>24</sub> H <sub>30</sub> N <sub>10</sub> O <sub>3</sub> )                                                                                                                        |
| IROSEO   | 2.263 Å | Deka, H.; Sarma, R.; Kumari, S.; Khare, A.; Baruah, J. B. <i>J. Solid State Chem.</i> <b>2011</b> , <i>184</i> , 1726. [Cd(H <sub>2</sub> O) <sub>6</sub> ](C <sub>14</sub> H <sub>10</sub> O <sub>6</sub> )·2H <sub>2</sub> O                                                                                                     |
| FIKQIA   | 2.267 Å | Liu, Q.-Y.; Xu, L. <i>CrystEngComm</i> <b>2005</b> , <i>7</i> , 87. [Cd(H <sub>2</sub> O) <sub>6</sub> ][Cd <sub>2</sub> C <sub>42</sub> H <sub>46</sub> N <sub>2</sub> O <sub>20</sub> S <sub>2</sub> ] <sub>2</sub> ·10H <sub>2</sub> O                                                                                          |
| RUNHIU   | 2.269 Å | Colaneri, M. J.; Teat, S. J.; Vitali, J. <i>J. Phys. Chem. A</i> <b>2020</b> , <i>124</i> , 2242. [Cd(H <sub>2</sub> O) <sub>6</sub> ] <sub>0.96</sub> [Cu(H <sub>2</sub> O) <sub>6</sub> ] <sub>0.04</sub> (C <sub>4</sub> H <sub>8</sub> N <sub>3</sub> O) <sub>2</sub> (SO <sub>4</sub> ) <sub>2</sub> ·2H <sub>2</sub> O       |
| HAJGIK   | 2.270 Å | Mei, C. Z.; Zhang, P.; Shan, W. W. <i>Z. Kristallogr. – New Cryst. Struct.</i> <b>2011</b> , <i>226</i> , 383. [Cd(H <sub>2</sub> O) <sub>6</sub> ](C <sub>16</sub> H <sub>9</sub> O <sub>8</sub> ) <sub>2</sub> ·4H <sub>2</sub> O                                                                                                |
| IDUBOZ   | 2.270 Å | Liu, W.-L.; Zhang, Y.-Y.; Lu, Y.; Hu, X.-Y. <i>Acta Crystallogr., Sect. E</i> <b>2006</b> , <i>62</i> , m1582. [Cd(H <sub>2</sub> O) <sub>6</sub> ][CuC <sub>11</sub> H <sub>12</sub> N <sub>2</sub> O <sub>4</sub> ] <sub>2</sub> ·12H <sub>2</sub> O                                                                             |
| LEZCAW   | 2.270 Å | Maldonado, C. R.; Quiros, M.; Salas, J. M. <i>Dalton Trans.</i> <b>2012</b> , <i>41</i> , 10390. [Cd(H <sub>2</sub> O) <sub>6</sub> ](C <sub>6</sub> H <sub>6</sub> N <sub>5</sub> O <sub>2</sub> ) <sub>2</sub> ·C <sub>10</sub> H <sub>8</sub> N <sub>2</sub>                                                                    |

|          |         |                                                                                                                                                                                                                                                                                                |
|----------|---------|------------------------------------------------------------------------------------------------------------------------------------------------------------------------------------------------------------------------------------------------------------------------------------------------|
| MAVHEX   | 2.270 Å | Zhao, B.-T.; Hu, P.-Z.; Wang, J.-G.; Ma, L.-F.; Wang, L.-Y.; Ng, S. W. <i>Acta Crystallogr., Sect. E</i> <b>2005</b> , <i>61</i> , m1957. [Cd(H <sub>2</sub> O) <sub>6</sub> ] <sub>2</sub> (C <sub>24</sub> H <sub>12</sub> O <sub>16</sub> S <sub>8</sub> )·H <sub>2</sub> O                 |
| VOHVUK   | 2.270 Å | Lian-Cai Du, L.-C. <i>Acta Crystallogr., Sect. E</i> <b>2008</b> , <i>64</i> , m1625. [Cd(H <sub>2</sub> O) <sub>6</sub> ](C <sub>14</sub> H <sub>10</sub> N <sub>2</sub> O <sub>6</sub> S <sub>2</sub> )·2H <sub>2</sub> O                                                                    |
| BISCOX   | 2.272 Å | Li, Z.-J.; Yao, J.; Tao, Q.; Jiang, L.; Lu, T.-B. <i>Inorg. Chem.</i> <b>2013</b> , <i>52</i> , 11694. [Cd(H <sub>2</sub> O) <sub>6</sub> ](C <sub>10</sub> H <sub>14</sub> O <sub>4</sub> S) <sub>2</sub>                                                                                     |
| HIPZAI   | 2.274 Å | Zhang, S.-G.; Feng, Y.-L.; Su, H. <i>Acta Crystallogr., Sect. E</i> <b>2008</b> , <i>64</i> , m1625. [Cd(H <sub>2</sub> O) <sub>6</sub> ](C <sub>9</sub> H <sub>7</sub> N <sub>4</sub> O <sub>3</sub> S) <sub>2</sub>                                                                          |
| CIVBOA   | 2.275 Å | Shi, J.; Wang, Y.-C.; Wang, Q.-Y.; Zhang, Z.-T. <i>Inorg. Chim. Acta</i> <b>2014</b> , <i>409</i> , 259. [Cd(H <sub>2</sub> O) <sub>6</sub> ](C <sub>17</sub> H <sub>12</sub> BrO <sub>9</sub> S) <sub>2</sub> ·2H <sub>2</sub> O                                                              |
| NAYXUH   | 2.275 Å | Zhou, H.-B.; Li, M.-T.; Shi, S.-M. <i>Acta Crystallogr., Sect. E</i> <b>2005</b> , <i>61</i> , m2749. [Cd(H <sub>2</sub> O) <sub>6</sub> ][CdC <sub>12</sub> H <sub>32</sub> N <sub>8</sub> O <sub>4</sub> ](C <sub>10</sub> H <sub>8</sub> NO <sub>3</sub> S) <sub>4</sub> ·6H <sub>2</sub> O |
| 432328   | 2.276 Å | Mazej, Z.; Goresnik, E. Z. <i>Kristallogr. – Crystalline Mater.</i> <b>2017</b> , <i>232</i> , 339. [Cd(H <sub>2</sub> O) <sub>6</sub> ][SnF <sub>3</sub> ] <sub>2</sub>                                                                                                                       |
| VISKOZ   | 2.276 Å | Jlassi, R.; Rekik, W.; Naili, H.; Mhiri, T.; Bataille, T. <i>Zh. Strukt. Khim.</i> <b>2013</b> , <i>54</i> , 1092. [Cd(H <sub>2</sub> O) <sub>6</sub> ](C <sub>5</sub> H <sub>14</sub> N <sub>2</sub> )(SO <sub>4</sub> ) <sub>2</sub>                                                         |
| 62039    | 2.277 Å | Johansson, G.; Sandström, M. <i>Acta Chem. Scand., Ser. A</i> <b>1987</b> , <i>41</i> , 113. [Cd(H <sub>2</sub> O) <sub>6</sub> ](ClO <sub>4</sub> ) <sub>2</sub>                                                                                                                              |
| 14379    | 2.277 Å | Montgomery, H.; Lingafelter, E. C. <i>Acta Crystallogr.</i> <b>1966</b> , <i>20</i> , 728. (NH <sub>4</sub> ) <sub>2</sub> [Cd(H <sub>2</sub> O) <sub>6</sub> ](SO <sub>4</sub> ) <sub>2</sub>                                                                                                 |
| CAWCIO   | 2.277 Å | Kennedy, A. R.; Stewart, H.; Eremin, K.; Stenger, J. <i>Chem. Eur. J.</i> <b>2012</b> , <i>18</i> , 3064. [Cd(H <sub>2</sub> O) <sub>6</sub> ](C <sub>20</sub> H <sub>13</sub> N <sub>2</sub> O <sub>4</sub> S) <sub>2</sub> ·4H <sub>2</sub> O                                                |
| PUWCEP   | 2.277 Å | Kim, J.; Chen, B.; Reineke, T. M.; Li, H.; Eddaoudi, M.; Moler, D. B.; O'Keefe, M.; Yaghi, O. M. <i>J. Am. Chem. Soc.</i> <b>2001</b> , <i>123</i> , 8239. [Cd(H <sub>2</sub> O) <sub>6</sub> ][CdC <sub>14</sub> H <sub>12</sub> O <sub>8</sub> ]·5H <sub>2</sub> O                           |
| 415119   | 2.278 Å | Tiritiris, I.; Schleid, T. <i>Z. Anorg. Allg. Chem.</i> <b>2005</b> , <i>631</i> , 1593. [Cd(H <sub>2</sub> O) <sub>6</sub> ]B <sub>12</sub> H <sub>12</sub>                                                                                                                                   |
| YOSZAI   | 2.278 Å | Maldonado, C. R.; Quiros, M.; Salas, J. M.; Rodriguez-Dieguez, A. <i>Inorg. Chim. Acta</i> <b>2009</b> , <i>362</i> , 1553. [Cd(H <sub>2</sub> O) <sub>6</sub> ](C <sub>6</sub> H <sub>6</sub> N <sub>5</sub> O <sub>2</sub> ) <sub>2</sub>                                                    |
| QEUHAH   | 2.279 Å | Song, J.; Hu, R.; Kang, B.; Lei, Y.; Li, F.; Yu, K. <i>J. Thermal Anal.</i> <b>1999</b> , <i>55</i> , 797. [Cd(H <sub>2</sub> O) <sub>6</sub> ][Cd(C <sub>2</sub> HN <sub>4</sub> O <sub>3</sub> ) <sub>4</sub> ]·4H <sub>2</sub> O                                                            |
| 14379    | 2.279 Å | Montgomery, H.; Lingafelter, E. C. <i>Acta Crystallogr.</i> <b>1966</b> , <i>20</i> , 728.                                                                                                                                                                                                     |
| PAYKUX01 | 2.279 Å | Rekik, W.; Naili, H.; Bataille, T. <i>J. Coord. Chem.</i> <b>2015</b> , <i>68</i> , 142. [Cd(H <sub>2</sub> O) <sub>6</sub> ](C <sub>6</sub> H <sub>14</sub> N <sub>2</sub> )(SO <sub>4</sub> ) <sub>2</sub>                                                                                   |
| WIZQIG   | 2.279 Å | Tai, X.-S.; Xu, J.; Feng, Y.-M.; Liang, Z.-P. <i>Acta Crystallogr., Sect. E</i> <b>2008</b> , <i>64</i> , m694. [Cd(H <sub>2</sub> O) <sub>6</sub> ](C <sub>13</sub> H <sub>10</sub> NO <sub>4</sub> S) <sub>2</sub> ·2H <sub>2</sub> O                                                        |
| 166590   | 2.280 Å | Kokunov, Y. V.; Gorbunova, Y. E.; Petrov, V. N.; Gustyakova, M. P.; Buslaev, Y. A. <i>Dokl. Akad. Nauk SSSR</i> <b>1989</b> , <i>307</i> , 1126. [Cd(H <sub>2</sub> O) <sub>6</sub> ][SnF <sub>3</sub> ] <sub>2</sub>                                                                          |
| GIMPID   | 2.281 Å | Kovalchukova, O. V.; Stash, A. I.; Nguen, D. D.; Strashnova, S. B.; Belsky, V. K. <i>Koord. Khim.</i> <b>2013</b> , <i>39</i> , 136. [Cd(H <sub>2</sub> O) <sub>6</sub> ](C <sub>5</sub> HN <sub>2</sub> O <sub>6</sub> ) <sub>2</sub> ·2H <sub>2</sub> O                                      |
| PAYKUX   | 2.282 Å | Wang, B.-Q.; Yan, H.-B.; Fang, C.-J.; Zhang, Z. <i>Acta Crystallogr., Sect. E</i> <b>2012</b> , <i>68</i> , m759. [Cd(H <sub>2</sub> O) <sub>6</sub> ](C <sub>6</sub> H <sub>14</sub> N <sub>2</sub> )(SO <sub>4</sub> ) <sub>2</sub>                                                          |

|             |                              |                                                                                                                                                                                                                                                                                                                                       |
|-------------|------------------------------|---------------------------------------------------------------------------------------------------------------------------------------------------------------------------------------------------------------------------------------------------------------------------------------------------------------------------------------|
| SEDSOM      | 2.282 Å                      | Tahli, A.; Koc, U.; Elshaarawy, R. F. M.; Kautz, A. C.; Janiak, C. <i>Crystals</i> <b>2016</b> , 6, 23. [Cd(H <sub>2</sub> O) <sub>6</sub> ][CdC <sub>11</sub> H <sub>11</sub> N <sub>4</sub> O <sub>8</sub> ] <sub>2</sub> ·2H <sub>2</sub> O                                                                                        |
| 22686       | 2.284 Å                      | Feng, L.-N.; Tian, Y.-C.; Li, J.-Y.; Yang, J.-H.; Liu, B. <i>Dalton Trans.</i> <b>2020</b> , 49, 17152. Cs <sub>3</sub> [Cd(H <sub>2</sub> O) <sub>6</sub> [(Cd(H <sub>2</sub> O) <sub>3</sub> ) <sub>2</sub> Ru <sub>2</sub> (CO <sub>3</sub> ) <sub>4</sub> ] <sub>3</sub> ]·10H <sub>2</sub> O                                     |
| WEHGIC      | 2.284 Å                      | Rekik, W.; Naili, H.; Bataille, T. <i>J. Coord. Chem.</i> <b>2015</b> , 68, 142. [Cd(H <sub>2</sub> O) <sub>6</sub> ](C <sub>4</sub> H <sub>12</sub> N <sub>2</sub> )(SO <sub>4</sub> ) <sub>2</sub>                                                                                                                                  |
| RISLIP      | 2.286 Å                      | Zhang, G.; Ye, L.; Zhang, Y.; Liu, W. <i>Acta Crystallogr., Sect. E</i> <b>2008</b> , 64, m94. [Cd(H <sub>2</sub> O) <sub>6</sub> ][CuC <sub>15</sub> H <sub>17</sub> N <sub>2</sub> O <sub>4</sub> ] <sub>2</sub> ·2H <sub>2</sub> O                                                                                                 |
| XISCIO      | 2.286 Å                      | Cariati, E.; Forni, A.; Lucenti, E.; Marinotto, D.; Previtali, A.; Righetto, S.; Botta, C.; Bold, V.; Kravtsov, V.; Fonari, M. S. <i>Chem. Asian J.</i> <b>2019</b> , 14, 853. [Cd(H <sub>2</sub> O) <sub>6</sub> ](BF <sub>4</sub> ) <sub>2</sub> ·2C <sub>9</sub> H <sub>6</sub> N <sub>6</sub>                                     |
| XISCEK      | 2.287 Å                      | Cariati, E.; Forni, A.; Lucenti, E.; Marinotto, D.; Previtali, A.; Righetto, S.; Botta, C.; Bold, V.; Kravtsov, V.; Fonari, M. S. <i>Chem. Asian J.</i> <b>2019</b> , 14, 853. [Cd(H <sub>2</sub> O) <sub>6</sub> ](ClO <sub>4</sub> ) <sub>2</sub> ·2C <sub>9</sub> H <sub>6</sub> N <sub>6</sub>                                    |
| SELBAP      | 2.288 Å                      | Wu, Q.; Wang, H.-Y.; Dong, Y.-L.; Hu, J.-S.; Liu, D.-J.; Wu, C.; Xu, Y.; Ying, A.; Fang, M.; Liu, H.-K. <i>Chin. J. Struct. Chem.</i> <b>2017</b> , 33, 1889. [Cd(H <sub>2</sub> O) <sub>6</sub> ][Cd <sub>3</sub> C <sub>36</sub> H <sub>50</sub> N <sub>18</sub> O <sub>10</sub> S <sub>4</sub> ] <sub>2</sub> ·2CH <sub>3</sub> OH |
| AGOPIV      | 2.309 Å                      | Fan, J.; Sui, B.; Okamura, T.; Sun, W.-X.; Tang, W.-Y.; Ueyama, N. <i>J. Chem. Soc., Dalton Trans.</i> <b>2002</b> , 3868. [Cd(H <sub>2</sub> O) <sub>6</sub> ][Cd <sub>3</sub> C <sub>46</sub> H <sub>64</sub> N <sub>12</sub> O <sub>20</sub> S <sub>4</sub> ] <sub>2</sub> ·2H <sub>2</sub> O                                      |
| GAVTON      | 2.312 Å                      | Fu, A.-Y.; Wang, D.-Q.; Sun, Y.-L. <i>Acta Crystallogr., Sect. E</i> <b>2005</b> , 61, m2353. [Cd(H <sub>2</sub> O) <sub>6</sub> ](C <sub>15</sub> H <sub>15</sub> O <sub>2</sub> )                                                                                                                                                   |
| <b>Mean</b> | <b>2.266 Å/57 structures</b> |                                                                                                                                                                                                                                                                                                                                       |

### ***Dimeric hydrate complex***

*Six-coordination, octahedral configuration*

ICSD/CSD code  $d(\text{Cd-O})_b + d(\text{Cd-O})_t$  Reference, compound formula

UYUKEF 2.384 + 2.219 Å Pandey, R.; Yadav, M.; Kumar, P.; Li, P.-Z.; Singh, S. K.; Xu, Q.; Pandey, D. S. *Inorg. Chim. Acta* **2011**, 376, 195. [Cd<sub>2</sub>(H<sub>2</sub>O)<sub>10</sub>][CdC<sub>18</sub>H<sub>12</sub>Cl<sub>2</sub>N<sub>2</sub>O<sub>8</sub>]

3.650 Å

**Mean 2.274 Å/ 1 structure**

**Table S1bc.** Summary of solid state structures containing hydrated mercury(I) and mercury(II) ions. The ICSD/CDS code refers to the code in the Inorganic Crystal Structure Database (ICSD, number) and Cambridge Structure Database (CSD, letters), respectively, and the mean Hg-O bond distance,  $d(\text{Hg-O})$ ;  $d(\text{Hg-Hg})$  denotes the Hg-Hg bond distance in the dimeric mercury(I) ion. Data in purple text are not included in the mean distance as they are uncertain or differ significantly from the mean value.

### Mercury(I)

#### *Two-coordination, linear configuration*

| ICSD/CSD code | $d(\text{Hg-O}) + d(\text{Hg-Hg})$  | Reference, compound formula                                                                                                                                                  |
|---------------|-------------------------------------|------------------------------------------------------------------------------------------------------------------------------------------------------------------------------|
| 412799        | 2.109 + 2.504 Å                     | Weil, M. <i>Z. Anorg. Allg. Chem.</i> <b>2004</b> , 630, 1048. $[\text{Hg}_2(\text{OH}_2)_2](\text{H}_4\text{TeO}_6)(\text{H}_6\text{TeO}_6)$                                |
| 1958          | 2.127 + 2.510 Å                     | Grdenic, D.; Sikirica, M.; Vickovic, I. <i>Acta Crystallogr., Sect. B</i> <b>1975</b> , 31, 2174. $[\text{Hg}_2(\text{OH}_2)_2](\text{NO}_3)_2$                              |
| 27442         | 2.140 + 2.500 Å                     | Johansson, G. <i>Acta Chem. Scand.</i> <b>1966</b> , 20, 553. $[\text{Hg}_2(\text{OH}_2)_2](\text{ClO}_4)_2 \cdot 4\text{H}_2\text{O}$                                       |
| 26668         | 2.141 + (2.549) Å                   | Grdenic, D. <i>J. Chem. Soc.</i> <b>1956</b> , 1312. $[\text{Hg}_2(\text{OH}_2)_2](\text{NO}_3)_2$                                                                           |
| 32505         | 2.144 + 2.500 Å                     | Fourquet, J. L.; Plet, F.; de Pape, R. <i>Acta Crystallogr., Sect. B</i> <b>1981</b> , 37, 2136. $[\text{Hg}_2(\text{OH}_2)_2](\text{AlF}_5)_2$                              |
| 412433        | 2.148 + 2.492 Å                     | Berkei, M.; Schuermann, M.; Bernhardt, E.; Willner, H. <i>Z. Naturforsch., Teil B</i> <b>2002</b> , 57, 615. $[\text{Hg}_2(\text{OH}_2)_2](\text{SbF}_6)_2 \cdot 4\text{HF}$ |
| 23125         | 2.198 + 2.496 Å                     | Dorm, E. <i>Acta Chem. Scand.</i> <b>1971</b> , 25, 1655. $[\text{Hg}_2(\text{OH}_2)_2](\text{SiF}_6)_2$                                                                     |
| <b>Mean</b>   | <b>2.135 + 2.501 Å/6 structures</b> |                                                                                                                                                                              |

### Mercury(II)

#### *Six-coordination, octahedral configuration*

| ICSD/CSD code | $d(\text{Hg-O})$           | Reference, compound formula                                                                                                             |
|---------------|----------------------------|-----------------------------------------------------------------------------------------------------------------------------------------|
| 1640          | 2.342 Å                    | Johansson, G.; Sandström, M. <i>Acta Chem Scand., Ser. A</i> <b>1978</b> , 32, 109. $[\text{Hg}(\text{H}_2\text{O})_6](\text{ClO}_4)_2$ |
| <b>Mean</b>   | <b>2.342 Å/1 structure</b> |                                                                                                                                         |



**Table S2.** Summary of reported crystal structures containing oxoanions ions not binding to a metal ion, except alkali metal ions. For the perchlorate ion, a limited selection has been made due to the large number of reported structures. References in purple denote structures with M–O bond distances outside 2% of the mean value, and they are not included in the calculated mean values. The data have been collected from the Inorganic Crystal Structure Database (ICSD) and the Cambridge Structure Database (CSD).

### Chlorite ion, ClO<sub>2</sub><sup>-</sup>

| ICSD/CSD code | d(Cl-O)                      | Reference                                                                                                                                                                                              |
|---------------|------------------------------|--------------------------------------------------------------------------------------------------------------------------------------------------------------------------------------------------------|
| 1954          | 1.561 Å                      | Tarimci, C.; Schempp, E. <i>Acta Crystallogr., Sect. B</i> <b>1975</b> , <i>31</i> , 2146-2149. NaClO <sub>2</sub> ·3H <sub>2</sub> O                                                                  |
| 26511         | 1.562 Å                      | Gillespie, R. B.; Sparks, R. A.; Trueblood, K. N. <i>Acta Crystallogr.</i> <b>1959</b> , <i>12</i> , 867-872. NH <sub>4</sub> ClO <sub>2</sub>                                                         |
| 22            | 1.564 Å                      | Tarimci, C.; Rosenstein, R. D.; Schempp, E. <i>Acta Crystallogr., Sect. B</i> <b>1976</b> , <i>32</i> , 610-612. NaClO <sub>2</sub>                                                                    |
| 59935         | 1.565 Å                      | Smolentsev, A. I.; Naumov, D. Y. <i>Acta Crystallogr., Sect. E</i> <b>2005</b> , <i>61</i> , i17-i19. KClO <sub>2</sub>                                                                                |
| 1858          | 1.566 Å                      | Tazzoli, V.; Riganti, V.; Giuseppetti, G.; Coda, A. <i>Acta Crystallogr., Sect. B</i> <b>1975</b> , <i>31</i> , 1032-1037. NaClO <sub>2</sub> ·3H <sub>2</sub> O                                       |
| 171021        | 1.570 Å                      | Smolentsev, A. I.; Naumov, D. Y. <i>Acta Crystallogr., Sect. E</i> <b>2005</b> , <i>61</i> , i249-i250. Sr(ClO <sub>2</sub> )                                                                          |
| 170034        | 1.575 Å                      | Smolentsev, A. I.; Naumov, D. Y. <i>Acta Crystallogr., Sect. E</i> <b>2005</b> , <i>61</i> , i49-i50. Ba(ClO <sub>2</sub> )·3.5H <sub>2</sub> O                                                        |
| 59921         | 1.576 Å                      | Smolentsev, A. I.; Naumov, D. Y. <i>Acta Crystallogr., Sect. E</i> <b>2005</b> , <i>61</i> , i38-i40. NH <sub>4</sub> ClO <sub>2</sub>                                                                 |
| 59936         | 1.578 Å                      | Smolentsev, A. I.; Naumov, D. Y. <i>Acta Crystallogr., Sect. E</i> <b>2005</b> , <i>61</i> , i17-i19. LiClO <sub>2</sub>                                                                               |
| 162802        | 1.578 Å                      | Smolentsev, A. I.; Naumov, D. Y. <i>Zh. Strukt. Khim.</i> (Issue-No. from 1981) <b>2008</b> , <i>49</i> , 725-728. RbClO <sub>2</sub>                                                                  |
| 69587         | 1.580 Å                      | Marsh, R. E. <i>Acta Crystallogr., Sect. C</i> <b>1991</b> , <i>47</i> , 1775-1775. [Mg(H <sub>2</sub> O) <sub>6</sub> ](ClO <sub>2</sub> ) <sub>2</sub>                                               |
| 68485         | 1.582 Å                      | Okuda, M.; Ishihara, M.; Yamanaka, M.; Ohba, S.; Saito, Y. <i>Acta Crystallogr., Sect. C</i> <b>1990</b> , <i>46</i> , 1755-1759. [Mg(H <sub>2</sub> O) <sub>6</sub> ](ClO <sub>2</sub> ) <sub>2</sub> |
| 162803        | 1.582 Å                      | Smolentsev, A. I.; Naumov, D. Y. <i>Zh. Strukt. Khim.</i> (Issue-No. from 1981) <b>2008</b> , <i>49</i> , 725-728. CsClO <sub>2</sub>                                                                  |
| 171020        | 1.585 Å                      | Smolentsev, A. I.; Naumov, D. Y. <i>Acta Crystallogr., Sect. E</i> <b>2005</b> , <i>61</i> , i246-i248. Ca(ClO <sub>2</sub> )                                                                          |
| <b>Mean</b>   | <b>1.573 Å/14 structures</b> |                                                                                                                                                                                                        |

## Chlorate ion, ClO<sub>3</sub><sup>-</sup>

| ICSD/CSD | d(Cl-O) | Reference                                                                                                                                                                                                                                                                  |
|----------|---------|----------------------------------------------------------------------------------------------------------------------------------------------------------------------------------------------------------------------------------------------------------------------------|
| XOJDOS   | 1.431 Å | Wurzenberger, M. H. H.; Gruhne, M. S.; Lommel, M.; Szimhardt, N.; Klapotke, T. M.; Stierstorfer, J. <i>Chem. – Asian J.</i> <b>2019</b> , <i>14</i> , 2018. [Cu(NC <sub>3</sub> H <sub>6</sub> N <sub>3</sub> ) <sub>6</sub> ](ClO <sub>3</sub> ) <sub>2</sub>             |
| 76434    | 1.433 Å | Smith, P.; Martinez-Carrera, S. <i>Anal. Real Sociedad Esp. Fis. Quim., Serie A</i> <b>1951</b> , <i>47</i> , 89. TlBrO <sub>3</sub>                                                                                                                                       |
| CAYSAX   | 1.437 Å | Xu-Dong Chen, X.-D.; Mak, T. C. W. <i>Chem. Commun.</i> <b>2005</b> , 3529. [Ag <sub>2</sub> C <sub>22</sub> H <sub>16</sub> N <sub>4</sub> O <sub>2</sub> ](ClO <sub>3</sub> ) <sub>2</sub>                                                                               |
| 36260    | 1.439 Å | Gomis, V.; Garcia Blanco, S. <i>Anal. Real Sociedad Espanola Fis. Quim., Ser. A:</i> <b>1951</b> , <i>47</i> , 95. RbClO <sub>3</sub>                                                                                                                                      |
| LANFEP   | 1.441 Å | Freund, R.; Kraft, M.; Volkmer, D. <i>Eur. J. Inorg. Chem.</i> <b>2022</b> , 202100853. M.H.H.Wurzenberger, M.S.Gruhne, M.Lommel, N.Szimhardt, T.M.Klapotke, J.Stierstorfer                                                                                                |
| MIZCIL   | 1.443 Å | Jiang, W.; Huang, W.; Xu, M.; Leng, X.; Lu, L.; Shen, Q. <i>Chem. - Eur. J.</i> <b>2023</b> , <i>29</i> , e202300991. (C <sub>48</sub> H <sub>48</sub> N <sub>6</sub> )(ClO <sub>3</sub> ) <sub>2</sub>                                                                    |
| THURTL   | 1.451 Å | Mitchell, J.; Boeyens, J. C. A. <i>Acta Crystallogr., Sect. C</i> <b>1998</b> , <i>54</i> , 927. [TiC <sub>4</sub> H <sub>16</sub> N <sub>8</sub> S <sub>4</sub> ] <sub>n</sub> (ClO <sub>3</sub> ) <sub>n</sub>                                                           |
| AYUXOH   | 1.455 Å | Chun-Xia Ren; Bao-Hui Ye; Feng He; Lin Cheng; Xiao-Ming Chen <i>CrystEngComm</i> <b>2000</b> , <i>6</i> , 200. [Ag(C <sub>12</sub> H <sub>14</sub> N <sub>4</sub> ) <sub>2</sub> ](ClO <sub>3</sub> ) <sub>2</sub>                                                         |
| LOWLAM   | 1.455 Å | Sinnwell, M. A.; Baltrusaitis, J.; MacGillivray, L. R. <i>Cryst. Growth Des.</i> <b>2015</b> , <i>15</i> , 538. [(Ag(NC <sub>5</sub> H <sub>4</sub> CHCHC <sub>5</sub> F <sub>5</sub> ) <sub>2</sub> ) <sub>2</sub> ](ClO <sub>3</sub> ) <sub>2</sub>                      |
| EJOJEV   | 1.456 Å | Hull, K. L.; Schipper, D. E.; Oliver, A. G. <i>RSC Adv.</i> <b>2020</b> , <i>10</i> , 44973. N( <i>n</i> -C <sub>4</sub> H <sub>9</sub> ) <sub>4</sub> ClO <sub>3</sub>                                                                                                    |
| MAPARC   | 1.456 Å | Hlavata, D. <i>Acta Crystallogr., Sect. B</i> <b>1971</b> , <i>27</i> , 1483. (C <sub>16</sub> H <sub>21</sub> N <sub>3</sub> )ClO <sub>3</sub>                                                                                                                            |
| HUJVOX   | 1.457 Å | Gentile, P. S.; Ocampo, A. P. <i>Inorg. Chim. Acta</i> <b>1978</b> , <i>29</i> , 83. Ca <sub>2</sub> (C <sub>4</sub> H <sub>7</sub> NO <sub>2</sub> ) <sub>4</sub> (ClO <sub>3</sub> ) <sub>2</sub> ·H <sub>2</sub> O                                                      |
| EJOJOF   | 1.458 Å | Hull, K. L.; Schipper, D. E.; Oliver, A. G. <i>RSC Adv.</i> <b>2020</b> , <i>10</i> , 44973. ((C <sub>6</sub> H <sub>5</sub> ) <sub>3</sub> PNP(C <sub>6</sub> H <sub>5</sub> ) <sub>3</sub> )N( <i>n</i> -C <sub>4</sub> H <sub>9</sub> ) <sub>4</sub> ClO <sub>3</sub>   |
| FOZGEI   | 1.461 Å | Ilovic, I.; Uzarevic, K. <i>CrystEngComm</i> <b>2015</b> , <i>17</i> , 3153. (C <sub>20</sub> H <sub>26</sub> N <sub>3</sub> O <sub>6</sub> )ClO <sub>3</sub> ·1.5CH <sub>3</sub> OH                                                                                       |
| QUPJIV   | 1.461 Å | Georgiev, I. G.; Bucar, D.-K.; MacGillivray, L. R. <i>Chem. Commun.</i> <b>2010</b> , <i>46</i> , 4956. [Ag(NC <sub>5</sub> H <sub>4</sub> CHCH <sub>2</sub> ) <sub>2</sub> ](ClO <sub>3</sub> ) <sub>2</sub>                                                              |
| IJETAV   | 1.462 Å | Reichel, M.; Wurzenberger, M. H. H.; Lommel, M.; Kofen, M.; Krumm, B.; Stierstorfer, J.; Karaghiosoff, K. <i>Z. Anorg. Allg. Chem.</i> <b>2020</b> , <i>647</i> , 341. [Cu(NC <sub>2</sub> H <sub>3</sub> FN <sub>3</sub> ) <sub>6</sub> ](ClO <sub>3</sub> ) <sub>2</sub> |
| WONGUB   | 1.463 Å | Xiaopeng Hu; Jiwen Cai; Xiaoleng Feng; Liangnian Ji <i>J. Chem. Cryst.</i> <b>2000</b> , <i>30</i> , 27. [Co(H <sub>2</sub> N(C <sub>2</sub> H <sub>4</sub> N) <sub>3</sub> H <sub>2</sub> )(NO <sub>2</sub> ) <sub>2</sub> ](ClO <sub>3</sub> ) <sub>2</sub>              |
| DIPHER   | 1.464 Å | Yoshida, M.; Shimada, T.; Ishida, T.; Kogane, T. <i>Polyhedron</i> <b>2013</b> , <i>66</i> , 75. [CuC <sub>10</sub> H <sub>10</sub> N <sub>6</sub> O <sub>2</sub> ] <sub>n</sub> (ClO <sub>3</sub> ) <sub>2n</sub>                                                         |
| NUMYID   | 1.467 Å | Todorov, T.; Petrova, R.; Kossev, K.; Macicek, J.; Angelova, O. <i>Acta Crystallogr., Sect. B</i> <b>1970</b> , <i>26</i> , 1121. [Mg(OC(NH <sub>2</sub> ) <sub>2</sub> ) <sub>6</sub> ](ClO <sub>3</sub> ) <sub>2</sub>                                                   |

|        |         |                                                                                                                                                                                                                                                                                                |
|--------|---------|------------------------------------------------------------------------------------------------------------------------------------------------------------------------------------------------------------------------------------------------------------------------------------------------|
| 59383  | 1.467 Å | Todorov, T.; Petrova, R.; Kossev, K.; Macicek, J.; Angelova, O. <i>Acta Crystallogr., Sect. C</i> <b>1998</b> , <i>54</i> , 927-929. [Mg(OC(NH <sub>2</sub> ) <sub>2</sub> ) <sub>6</sub> ](ClO <sub>3</sub> ) <sub>2</sub>                                                                    |
| NEWRAJ | 1.468 Å | Sharma, R.: Sharma, R. P.; Balaa, R.; Kariuki, B. M. <i>J. Mol. Struct.</i> <b>2007</b> , <i>826</i> , 177. [Co(H <sub>2</sub> NC <sub>2</sub> H <sub>4</sub> NH <sub>2</sub> )(NO <sub>2</sub> ) <sub>2</sub> ](ClO <sub>3</sub> ) <sub>2</sub>                                               |
| KIBYIH | 1.468 Å | Rosch, M.; Gruhne, M. S.; Lommel, M.; Endra, S. M. J.; Stierstorfer, J. <i>Inorg. Chem.</i> <b>2023</b> , <i>62</i> , 1488. [Cu(NC <sub>4</sub> H <sub>6</sub> N <sub>3</sub> ) <sub>6</sub> ](ClO <sub>3</sub> ) <sub>2</sub>                                                                 |
| SIBFUH | 1.469 Å | Wurzenberger, M. H. H.; Szimhardt, N.; Stierstorfer, J. <i>J. Am. Chem. Soc.</i> <b>2018</b> , <i>140</i> , 3206. [CuC <sub>15</sub> H <sub>24</sub> N <sub>24</sub> ](ClO <sub>3</sub> ) <sub>2</sub>                                                                                         |
| SODCUM | 1.469 Å | Song, F.; Al-Ameed, K.; Schilling, M.; Fox, T.; Lubner, S.; Patzke, G. R. <i>J. Am. Chem. Soc.</i> <b>2019</b> , <i>141</i> , 8846. [Co <sub>4</sub> C <sub>50</sub> H <sub>45</sub> N <sub>8</sub> O <sub>14</sub> ](ClO <sub>3</sub> ) <sub>2</sub> ·11H <sub>2</sub> O                      |
| KIGSIG | 1.470 Å | Jelen, J.; Tavčar, G. <i>Org. Lett.</i> <b>2023</b> , <i>25</i> , 3649. (C <sub>27</sub> H <sub>36</sub> ClN <sub>2</sub> )ClO <sub>3</sub>                                                                                                                                                    |
| ZAWKIT | 1.470 Å | Koskinen, L.; Jaaskelainen, S.; Oresmaa, L.; Haukka, M. <i>CrystEngComm</i> <b>2012</b> , <i>14</i> , 3509. [Ag <sub>2</sub> C <sub>24</sub> H <sub>32</sub> N <sub>12</sub> ](ClO <sub>3</sub> ) <sub>2</sub> ·CH <sub>3</sub> OH                                                             |
| 414606 | 1.472 Å | Sharma, R. P.; Bala, R.; Sharma, R.; Ferretti, V. <i>Inorg. Chim. Acta</i> <b>2005</b> , <i>358</i> , 3457-3464. [Co(NH <sub>3</sub> ) <sub>6</sub> ](ClO <sub>3</sub> ) <sub>2</sub>                                                                                                          |
| VEQZEX | 1.473 Å | Sharma, R. P.; Sharma, R.; Bala, R.; Venugopalan, P. <i>J. Mol. Struct.</i> <b>2006</b> , <i>789</i> , 133. [Co(H <sub>2</sub> NC <sub>2</sub> H <sub>4</sub> NH <sub>2</sub> )Cl <sub>2</sub> ](ClO <sub>3</sub> ) <sub>2</sub>                                                               |
| KOLMEG | 1.473 Å | Song, F.; Al-Ameed, K.; Schilling, M.; Fox, T.; Lubner, S.; Patzke, G. R. <i>J. Am. Chem. Soc.</i> <b>2019</b> , <i>141</i> , 8846. [Ni <sub>4</sub> C <sub>50</sub> H <sub>45</sub> N <sub>8</sub> O <sub>14</sub> ](ClO <sub>3</sub> ) <sub>2</sub> ·11H <sub>2</sub> O                      |
| JAXGAR | 1.474 Å | Petrosyan, A. M.; Karapetyan, H. A.; Sukiasyan, R. P.; Aghajanyan, A. E.; Morgunov, V. G.; Kravchenko, E. A.; Bush, A. A. <i>J. Mol. Struct.</i> <b>2005</b> , <i>752</i> , 144. (C <sub>6</sub> H <sub>15</sub> N <sub>4</sub> O <sub>2</sub> )ClO <sub>3</sub>                               |
| 1724   | 1.476 Å | Bats, J. W. <i>Acta Crystallogr., Sect. B</i> <b>1978</b> , <i>34</i> , 1679-1681. KClO <sub>3</sub>                                                                                                                                                                                           |
| 414607 | 1.476 Å | Sharma, R. P.; Bala, R.; Sharma, R.; Ferretti, V. <i>Inorg. Chim. Acta</i> <b>2005</b> , <i>358</i> , 3457-3464. [Co(NH <sub>3</sub> ) <sub>6</sub> ](ClO <sub>3</sub> ) <sub>2</sub>                                                                                                          |
| 16714  | 1.477 Å | Ramachandran, G. N.; Chandrasekaran, K. S. <i>Acta Crystallogr.</i> <b>1957</b> , <i>10</i> , 671-675. NaClO <sub>3</sub>                                                                                                                                                                      |
| 26684  | 1.477 Å | Zachariasen, W. H. <i>Z. Kristallogr., Kristallgeom., Kristallphys., Kristallchem.</i> <b>1929</b> , <i>71</i> , 517-529. NaClO <sub>3</sub>                                                                                                                                                   |
| 40285  | 1.477 Å | Lutz, H. D.; Buchmeier, W.; Jung, M.; Kellersohn, T. <i>Z. Kristallogr.</i> <b>1989</b> , <i>189</i> , 131-139. Ba(ClO <sub>3</sub> ) <sub>2</sub>                                                                                                                                             |
| HIQTIN | 1.477 Å | Salmasi, R.; Salimi, A.; Gholizadeh, M.; Rahmani, M.; Garrison, J. C. <i>J. Mol. Struct.</i> <b>2019</b> , <i>1179</i> , 549. ((C <sub>6</sub> H <sub>5</sub> ) <sub>3</sub> P(CH <sub>2</sub> ) <sub>2</sub> P(C <sub>6</sub> H <sub>5</sub> ) <sub>3</sub> )(ClO <sub>3</sub> ) <sub>2</sub> |
| 10283  | 1.478 Å | Brunton, G. <i>Mater. Res. Bull.</i> <b>1973</b> , <i>8</i> , 791-794. RbClO <sub>3</sub>                                                                                                                                                                                                      |
| 26409  | 1.478 Å | Danielsen, J.; Hazell, A.; Larsen, F. K. <i>Acta Crystallogr., Sect. B</i> <b>1981</b> , <i>37</i> , 913-915. KClO <sub>3</sub>                                                                                                                                                                |
| 61157  | 1.478 Å | Lutz, H. D.; Buchmeier, W.; Alici, E.; Eckers, W. <i>Z. Anorg. Allg. Chem.</i> <b>1985</b> , <i>529</i> , 46-56. Sr(ClO <sub>3</sub> ) <sub>2</sub>                                                                                                                                            |

|        |         |                                                                                                                                                                                                                                                                                     |
|--------|---------|-------------------------------------------------------------------------------------------------------------------------------------------------------------------------------------------------------------------------------------------------------------------------------------|
| CUZKIT | 1.478 Å | Ofori, A.; Suvanto, S.; Jaaskelainen, S.; Koskinen, L.; Koshevoy, I. O.; Hirva, P. <i>Cryst. Growth Des.</i> <b>2016</b> , <i>16</i> , 255. [Ag(NC <sub>3</sub> H <sub>7</sub> N <sub>2</sub> O) <sub>2</sub> ](ClO <sub>3</sub> ) <sub>2</sub>                                     |
| SIBFIV | 1.479 Å | Wurzenberger, M. H. H.; Szimhardt, N.; Stierstorfer, J. <i>J. Am. Chem. Soc.</i> <b>2018</b> , <i>140</i> , 3206. [Cu(H <sub>2</sub> O) <sub>2</sub> (C <sub>5</sub> H <sub>8</sub> N <sub>8</sub> O) <sub>2</sub> ](ClO <sub>3</sub> ) <sub>2</sub>                                |
| SIDNEB | 1.479 Å | Szimhardt, N.; Wurzenberger, M. H. H.; Zeisel, L.; Gruhne, M. S.; Lommel, M.; Stierstorfer, J. <i>J. Mater. Chem. A</i> <b>2018</b> , <i>6</i> , 16257. [Cu(NCH <sub>3</sub> N <sub>4</sub> ) <sub>6</sub> ](ClO <sub>3</sub> ) <sub>2</sub>                                        |
| 80338  | 1.480 Å | Sowa, H. <i>J. Solid State Chem.</i> <b>1995</b> , <i>118</i> , 378-382. NaClO <sub>3</sub>                                                                                                                                                                                         |
| 80340  | 1.480 Å | Sowa, H. <i>J. Solid State Chem.</i> <b>1995</b> , <i>118</i> , 378-382. NaClO <sub>3</sub>                                                                                                                                                                                         |
| IJESUO | 1.480 Å | Reichel, M.; Wurzenberger, M. H. H.; Lommel, M.; Kofen, M.; Krumm, B.; Stierstorfer, J.; Karaghiosoff, K. <i>Z. Anorg. Allg. Chem.</i> <b>2020</b> , <i>647</i> , 341. [Cu(NC <sub>2</sub> H <sub>6</sub> FN <sub>2</sub> ) <sub>3</sub> ](ClO <sub>3</sub> ) <sub>2</sub>          |
| IVICIC | 1.480 Å | Braun, V.; Wurzenberger, M. H. H.; Weippert, V.; Stierstorfer, J. <i>New. J. Chem.</i> <b>2021</b> , <i>45</i> , 11042. [Cu(NC <sub>4</sub> H <sub>6</sub> N <sub>3</sub> ) <sub>6</sub> ](ClO <sub>3</sub> ) <sub>2</sub>                                                          |
| IVOMEM | 1.480 Å | Sharma, R. P.; Singh, A.; Venugopalan, P.; Harrison, W. T. A. <i>J. Mol. Struct.</i> <b>2011</b> , <i>996</i> , 82. [Co(N <sub>2</sub> C <sub>12</sub> H <sub>8</sub> ) <sub>2</sub> CO <sub>3</sub> ](ClO <sub>3</sub> ) <sub>2</sub>                                              |
| KICMES | 1.480 Å | Rosch, M.; Gruhne, M. S.; Lommel, M.; Endra, S. M. J.; Stierstorfer, J. <i>Inorg. Chem.</i> <b>2023</b> , <i>62</i> , 1488. [Cu(NC <sub>3</sub> H <sub>4</sub> N <sub>3</sub> ) <sub>6</sub> ](ClO <sub>3</sub> ) <sub>2</sub>                                                      |
| EYEWOX | 1.481 Å | Gruhne, M. S.; Lenz, T.; Rosch, M.; Lommel, M.; Wurzenberger, T.M. H. H.; Klapotke, T. M.; Stierstorfer, J. <i>Dalton Trans.</i> <b>2021</b> , <i>50</i> , 10811. [Cu(NC <sub>3</sub> H <sub>5</sub> N <sub>4</sub> O <sub>3</sub> ) <sub>5</sub> ](ClO <sub>3</sub> ) <sub>2</sub> |
| 80339  | 1.482 Å | Sowa, H. <i>J. Solid State Chem.</i> <b>1995</b> , <i>118</i> , 378-382. NaClO <sub>3</sub>                                                                                                                                                                                         |
| DIHVUP | 1.482 Å | Kofen, M.; Lommel, M.; Wurzenberger, M. H. H.; Klapotke, T. M.; Stierstorfer, J. <i>Chem. – Eur. J.</i> <b>2022</b> , <i>28</i> , 202200492. [Cu(NC <sub>2</sub> H <sub>3</sub> N <sub>6</sub> ) <sub>6</sub> ](ClO <sub>3</sub> ) <sub>2</sub>                                     |
| QESXUL | 1.482 Å | Kofen, M.; Braun, V.; Endra, S. M. J.; Klapotke, T. M.; Stierstorfer, J. <i>Inorg. Chem.</i> <b>2022</b> , <i>61</i> , 17212. [Cu(NC <sub>2</sub> H <sub>3</sub> N <sub>4</sub> O <sub>3</sub> ) <sub>6</sub> ](ClO <sub>3</sub> ) <sub>2</sub>                                     |
| 31120  | 1.483 Å | Aravindakshan, C. <i>Z. Kristallogr., Kristallgeom., Kristallphys., Kristallchem.</i> <b>1958</b> , <i>111</i> , 35-45. KClO <sub>3</sub>                                                                                                                                           |
| FEQBUC | 1.484 Å | Kofen, M.; Klapotke, T. M.; Stierstorfer, J. <i>Chem. Eng. J.</i> <b>2023</b> , <i>452</i> , 139375. [Cu(NC <sub>2</sub> H <sub>3</sub> N <sub>4</sub> ) <sub>6</sub> ](ClO <sub>3</sub> ) <sub>2</sub> ·0.5H <sub>2</sub> O                                                        |
| 1301   | 1.485 Å | Abrahams, S. C.; Bernstein, J. L. <i>Acta Crystallogr., Sect. B</i> <b>1977</b> , <i>33</i> , 3601-3604. NaClO <sub>3</sub>                                                                                                                                                         |
| 63712  | 1.485 Å | Blackburn, A. C.; Gallucci, J. C.; Gerkin, R. E. <i>Acta Crystallogr., Sect. B</i> <b>1991</b> , <i>47</i> , 474-479. [Cu(H <sub>2</sub> O) <sub>4</sub> ](ClO <sub>3</sub> ) <sub>2</sub>                                                                                          |
| 80341  | 1.485 Å | Sowa, H. <i>J. Solid State Chem.</i> <b>1995</b> , <i>118</i> , 378-382. NaClO <sub>3</sub>                                                                                                                                                                                         |
| 30452  | 1.486 Å | Sikka, S. K.; Momin, S. N.; Rajagopal, H.; Chidambaram, R. <i>J. Chem. Phys.</i> <b>1968</b> , <i>48</i> , 1883-1890. Ba(ClO <sub>3</sub> ) <sub>2</sub> ·H <sub>2</sub> O                                                                                                          |
| 67106  | 1.487 Å | Gallucci, J. C.; Gerkin, R. E. <i>Acta Crystallogr., Sect. C</i> <b>1990</b> , <i>46</i> , 350-354. [Ni(H <sub>2</sub> O) <sub>6</sub> ](ClO <sub>3</sub> ) <sub>2</sub>                                                                                                            |

|             |                              |                                                                                                                                                                                                                                                     |
|-------------|------------------------------|-----------------------------------------------------------------------------------------------------------------------------------------------------------------------------------------------------------------------------------------------------|
| 26408       | 1.488 Å                      | Danielsen, J.; Hazell, A.; Larsen, F. K. <i>Acta Crystallogr., Sect. B</i> <b>1981</b> , <i>37</i> , 913-915. KClO <sub>3</sub>                                                                                                                     |
| CISMUQ      | 1.488 Å                      | Kohutekova, S.; Matulkova, I.; Zabransky, M.; Martin, J. L.; Cisarova, I.; Gyepes, R.; Nemeč, P.; Gryl, M.; Seidler, T.; Nemeč, I. <i>J. Solid State Chem.</i> <b>2023</b> , <i>327</i> , 124288. (CH <sub>8</sub> N <sub>5</sub> )ClO <sub>3</sub> |
| 1117        | 1.490 Å                      | Bruke-Laing, M. E.; Trueblood, K. N. <i>Acta Crystallogr., Sect. B</i> <b>1977</b> , <i>33</i> , 2698-2699. NaClO <sub>3</sub>                                                                                                                      |
| 23935       | 1.490 Å                      | Gillespie, R. B.; Gantzel, P. K.; Trueblood, K. N. <i>Acta Crystallogr.</i> <b>1962</b> , <i>15</i> , 1271-1272. NH <sub>4</sub> ClO <sub>3</sub>                                                                                                   |
| 63713       | 1.490 Å                      | Blackburn, A. C.; Gallucci, J. C.; Gerkin, R. E. <i>Acta Crystallogr., Sect. B</i> <b>1991</b> , <i>47</i> , 474-479. [Cu(H <sub>2</sub> O) <sub>4</sub> ](ClO <sub>3</sub> ) <sub>2</sub>                                                          |
| 80337       | 1.490 Å                      | Sowa, H. <i>J. Solid State Chem.</i> <b>1995</b> , <i>118</i> , 378-382. NaClO <sub>3</sub>                                                                                                                                                         |
| 31121       | 1.491 Å                      | Aravindakshan, C. Z. <i>Kristallogr., Kristallgeom., Kristallphys., Kristallchem.</i> <b>1959</b> , <i>111</i> , 241-248. NaClO <sub>3</sub>                                                                                                        |
| 139053      | 1.509 Å                      | Griesemer, S. D.; Ward, L.; Wolverton, C. <i>Phys. Rev Mater.</i> <b>2021</b> , <i>5</i> , 105003. CsClO <sub>3</sub>                                                                                                                               |
| <b>Mean</b> | <b>1.474 Å/62 structures</b> |                                                                                                                                                                                                                                                     |

## Perchlorate ion, ClO<sub>4</sub><sup>-</sup>

| ICSD/CSD code | d(Cl-O) | Reference                                                                                                                                                                                        |
|---------------|---------|--------------------------------------------------------------------------------------------------------------------------------------------------------------------------------------------------|
| 280494        | 1.423 Å | Figgis, B.; Sobolev, A.; Reynolds, P. <i>Acta Crystallogr., Sect. B</i> <b>1998</b> , <i>54</i> , 613. [Cs[Ru(NH <sub>3</sub> ) <sub>6</sub> ]Cl <sub>2</sub> (ClO <sub>4</sub> ) <sub>2</sub> ] |
| 9894          | 1.424 Å | Conant, J. W.; Roof Jr., R. B. <i>Acta Crystallogr., Sect. B</i> <b>1970</b> , <i>26</i> , 1928. N <sub>2</sub> H <sub>5</sub> ClO <sub>4</sub>                                                  |
| 173           | 1.425 Å | Berglund, B.; Tellgren, R.; Thomas, J.O. <i>Acta Crystallogr., Sect. B</i> <b>1998</b> , <i>54</i> , 613. NaClO <sub>4</sub> ·H <sub>2</sub> O                                                   |
| 280487        | 1.428 Å | Figgis, B.; Sobolev, A.; Reynolds, P. <i>Acta Crystallogr., Sect. B</i> <b>1998</b> , <i>54</i> , 613. [Cs[Co(NH <sub>3</sub> ) <sub>6</sub> ]Cl <sub>2</sub> (ClO <sub>4</sub> ) <sub>2</sub> ] |
| 23931         | 1.429 Å | Smith, H. G.; Levy, H. A. <i>Acta Crystallogr.</i> <b>1962</b> , <i>15</i> , 1201. NH <sub>4</sub> ClO <sub>4</sub>                                                                              |
| 425697        | 1.429 Å | Hennings, E.; Heinz, J.; Schmidt, H.; Voigt, W. <i>Z. Anorg. Allg. Chem.</i> <b>2013</b> , <i>639</i> , 922. NaClO <sub>4</sub> ·2H <sub>2</sub> O                                               |
| 63363         | 1.430 Å | Granzin, J. <i>Z. Kristallogr.</i> <b>1988</b> , <i>184</i> , 157. RbClO <sub>4</sub>                                                                                                            |
| 24329         | 1.431 Å | Liminga, R. <i>Acta Chem. Scand.</i> <b>1967</b> , <i>21</i> , 1217. NH <sub>4</sub> ClO <sub>4</sub>                                                                                            |
| 63364         | 1.433 Å | Granzin, J. <i>Z. Kristallogr.</i> <b>1988</b> , <i>184</i> , 157. CsClO <sub>4</sub>                                                                                                            |
| 172567        | 1.433 Å | Zhang, G.-L.; Li, Y.-T.; Wu, Z. Y.; Song, Y.-L. <i>Acta Crystallogr., Sect. E</i> <b>2006</b> , <i>62</i> , i150. NH <sub>4</sub> ClO <sub>4</sub>                                               |
| 280496        | 1.433 Å | Figgis, B.; Sobolev, A.; Reynolds, P. <i>Acta Crystallogr., Sect. B</i> <b>1998</b> , <i>54</i> , 613. Cs[Cr(NH <sub>3</sub> ) <sub>6</sub> ]Cl <sub>2</sub> (ClO <sub>4</sub> ) <sub>2</sub>    |
| 280492        | 1.433 Å | Figgis, B.; Sobolev, A.; Reynolds, P. <i>Acta Crystallogr., Sect. B</i> <b>1998</b> , <i>54</i> , 613. [Cs[Co(NH <sub>3</sub> ) <sub>6</sub> ]Cl <sub>2</sub> (ClO <sub>4</sub> ) <sub>2</sub> ] |
| 30564         | 1.434 Å | Lundgren, J. O. <i>Acta Crystallogr., Sect. B</i> <b>1979</b> , <i>35</i> , 1027. NH <sub>4</sub> ClO <sub>4</sub>                                                                               |
| 97716         | 1.434 Å | Zhang J.; Zhang Ti; Yang L. <i>Huozhayao Xuebao</i> <b>2002</b> , <i>25</i> , 33. NH <sub>4</sub> ClO <sub>4</sub>                                                                               |
| 425696        | 1.434 Å | Hennings, E.; Heinz, J.; Schmidt, H.; Voigt, W. <i>Z. Anorg. Allg. Chem.</i> <b>2013</b> , <i>639</i> , 922. NaClO <sub>4</sub> ·2H <sub>2</sub> O                                               |
| 633           | 1.435 Å | Choi, C. S.; Prask, H. J. <i>Acta Crystallogr., Sect. B</i> <b>1976</b> , <i>32</i> , 2919. NH <sub>4</sub> ClO <sub>4</sub>                                                                     |
| 200405        | 1.435 Å | Wartchow, R.; Berthold, H. J. <i>Z. Kristallogr.</i> <b>1980</b> , <i>147</i> , 307. NaClO <sub>4</sub>                                                                                          |
| 280489        | 1.435 Å | Figgis, B.; Sobolev, A.; Reynolds, P. <i>Acta Crystallogr., Sect. B</i> <b>1998</b> , <i>54</i> , 613. K[Ru(NH <sub>3</sub> ) <sub>6</sub> ]Cl <sub>2</sub> (ClO <sub>4</sub> ) <sub>2</sub>     |
| 280491        | 1.435 Å | Figgis, B.; Sobolev, A.; Reynolds, P. <i>Acta Crystallogr., Sect. B</i> <b>1998</b> , <i>54</i> , 613. Cs[Ru(NH <sub>3</sub> ) <sub>6</sub> ]Cl <sub>2</sub> (ClO <sub>4</sub> ) <sub>2</sub>    |
| 2080          | 1.435 Å | Prince, E.; Dickens, B.; Rush, J. J. <i>Acta Crystallogr., Sect. B</i> <b>1974</b> , <i>30</i> , 1167. NH <sub>3</sub> OHClO <sub>4</sub>                                                        |
| 1137          | 1.436 Å | Johansson, G. B.; Lindqvist, O. <i>Acta Crystallogr., Sect. B</i> <b>1977</b> , <i>33</i> , 2918. KClO <sub>4</sub>                                                                              |
| 22504         | 1.439 Å | Pugachev, V. M.; Erenburg, B. G.; Khisamov, A. A. <i>Zh. Strukt. Khim.</i> <b>1985</b> , <i>26</i> , 162. KCs(ClO <sub>4</sub> ) <sub>2</sub>                                                    |
| 13311         | 1.439 Å | Lundgren, J. O. <i>Acta Crystallogr., Sect. B</i> <b>1980</b> , <i>36</i> , 1774. KClO <sub>4</sub>                                                                                              |
| 87617         | 1.440 Å | Reynolds, P. A.; Figgis, B. N.; Sobolev, A. N. <i>Aust. J. Chem.</i> <b>1999</b> , <i>52</i> , 219. K[Ru(NH <sub>3</sub> ) <sub>6</sub> ]Cl <sub>2</sub> (ClO <sub>4</sub> ) <sub>2</sub>        |
| 1946          | 1.442 Å | Peyronel, G.; Pignedoli, A. <i>Acta Crystallogr., Sect. B</i> <b>1975</b> , <i>31</i> , 2052. NH <sub>4</sub> ClO <sub>4</sub>                                                                   |
| 8042          | 1.445 Å | Lundgren, J. O.; Liminga, R. <i>Acta Crystallogr., Sect. B</i> <b>1979</b> , <i>35</i> , 1023. NH <sub>4</sub> ClO <sub>4</sub>                                                                  |
| 749           | 1.443 Å | Fugel, M.; Malaspina, L. A.; Pal, R.; T., Sajesh P.; Shi, M. W.; Spackman, M. A.; Sugimoto, K. Grabowsky, S. <i>Chem. Eur. J.</i> <b>2019</b> , <i>25</i> , 6523. KClO <sub>4</sub>              |
| 35111         | 1.443 Å | Bats, J. W.; Fuess, H. <i>Acta Crystallogr., Sect. B</i> <b>1982</b> , <i>38</i> , 2116. KClO <sub>4</sub>                                                                                       |
| 87617         | 1.444 Å | Reynolds, P. A.; Figgis, B. N.; Sobolev, A. N. <i>Aust. J. Chem.</i> <b>1999</b> , <i>52</i> , 219. K[Cr(NH <sub>3</sub> ) <sub>6</sub> ]Cl <sub>2</sub> (ClO <sub>4</sub> ) <sub>2</sub>        |

|                |                                  |                                                                                                                                                                                                                                                                                                                                                    |
|----------------|----------------------------------|----------------------------------------------------------------------------------------------------------------------------------------------------------------------------------------------------------------------------------------------------------------------------------------------------------------------------------------------------|
| 170089<br>Mean | 1.446 Å<br>1.435 Å/30 structures | Marabello, D.; Bianchi, R.; Gervasio, G.; Cargnoni, F. <i>Acta Crystallogr., Sect. A</i> <b>2004</b> , 60, 494. KClO <sub>4</sub>                                                                                                                                                                                                                  |
| AXUFAA         | 1.414 Å                          | Harrowfield, J. M.; Ogden, M. I.; Skelton, B. W.; White, A. H. <i>Inorg. Chim. Acta</i> <b>2004</b> , 357, 2404. [Th(OS(CH <sub>3</sub> ) <sub>2</sub> ) <sub>9</sub> ](ClO <sub>4</sub> ) <sub>4</sub>                                                                                                                                            |
| BIPMIW         | 1.426 Å                          | Persson, I. <i>Acta Chem. Scand., Ser. A</i> <b>1982</b> , 36, 7. [Zn(OS(CH <sub>3</sub> ) <sub>2</sub> ) <sub>6</sub> ](ClO <sub>4</sub> ) <sub>2</sub>                                                                                                                                                                                           |
| BIPMIW         | 1.391 Å                          | Chan, E. J.; Cox, B. G.; Harrowfield, J. M.; Ogden, M. I.; Skelton, B. W.; White, A. H. <i>Inorg. Chim. Acta</i> <b>2004</b> , 357, 2365. [Zn(OS(CH <sub>3</sub> ) <sub>2</sub> ) <sub>6</sub> ](ClO <sub>4</sub> ) <sub>2</sub>                                                                                                                   |
| CDDMSO         | 1.372 Å                          | Sandström, M. <i>Acta Chem. Scand., Ser. A</i> <b>1978</b> , 32, 519. [Cd(OS(CH <sub>3</sub> ) <sub>2</sub> ) <sub>6</sub> ](ClO <sub>4</sub> ) <sub>2</sub>                                                                                                                                                                                       |
| CDDMSO02       | 1.377 Å                          | Lyubeznova, T. Y.; Ponomarev, V. I. <i>Kristallografiya</i> <b>1989</b> , 34, 862. [Cd(OS(CH <sub>3</sub> ) <sub>2</sub> ) <sub>6</sub> ](ClO <sub>4</sub> ) <sub>2</sub>                                                                                                                                                                          |
| EROQAD         | 1.428 Å                          | Harrowfield, J. M.; Richmond, W. R.; Skelton, B. W.; White, A. H. <i>Eur. J. Inorg. Chem.</i> <b>2004</b> , 227. [Mg(OS(CH <sub>3</sub> ) <sub>2</sub> ) <sub>6</sub> ](ClO <sub>4</sub> ) <sub>2</sub>                                                                                                                                            |
| EROQAD01       | 1.368 Å                          | Ullström, A.-S.; Warminska, D.; Persson, I. <i>J. Coord. Chem.</i> <b>2005</b> , 611. [Mg(OS(CH <sub>3</sub> ) <sub>2</sub> ) <sub>6</sub> ](ClO <sub>4</sub> ) <sub>2</sub>                                                                                                                                                                       |
| EROQEH         | 1.437 Å                          | Harrowfield, J. M.; Richmond, W. R.; Skelton, B. W.; White, A. H. <i>Eur. J. Inorg. Chem.</i> <b>2004</b> , 227. [Ba(OS(CH <sub>3</sub> ) <sub>2</sub> ) <sub>10</sub> (ClO <sub>4</sub> ) <sub>2</sub> ](ClO <sub>4</sub> ) <sub>2</sub>                                                                                                          |
| EROQIL         | 1.402 Å                          | Harrowfield, J. M.; Richmond, W. R.; Skelton, B. W.; White, A. H. <i>Eur. J. Inorg. Chem.</i> <b>2004</b> , 227. [Sr <sub>2</sub> (OS(CH <sub>3</sub> ) <sub>2</sub> ) <sub>11</sub> ][Sr <sub>2</sub> (OS(CH <sub>3</sub> ) <sub>2</sub> ) <sub>12</sub> ][Sr(OS(CH <sub>3</sub> ) <sub>2</sub> ) <sub>6</sub> ](ClO <sub>4</sub> ) <sub>14</sub> |
| FALVEU         |                                  |                                                                                                                                                                                                                                                                                                                                                    |

## Bromate ion, BrO<sub>3</sub><sup>-</sup>

| ICSD/CSD code | d(Br-O) | Reference                                                                                                                                                                                                                                                         |
|---------------|---------|-------------------------------------------------------------------------------------------------------------------------------------------------------------------------------------------------------------------------------------------------------------------|
| AYUXIB        | 1.629 Å | Chun-Xia Ren, Bao-Hui Ye, Feng He, Lin Cheng, Xiao-Ming Chen <i>CrystEngComm</i> <b>2004</b> , 6, 200. [Ag <sub>2</sub> C <sub>24</sub> H <sub>28</sub> N <sub>8</sub> ](BrO <sub>3</sub> ) <sub>2</sub>                                                          |
| EJOJIZ        | 1.630 Å | Hull, K. L.; Schipper, D. E.; Oliver, A. G. <i>RSC Adv.</i> <b>2020</b> , 10, 44973. (N(C <sub>6</sub> H <sub>5</sub> ) <sub>2</sub> )BrO <sub>3</sub>                                                                                                            |
| LEKDAJ        | 1.631 Å | Cui, Y.; Zhang, X.; Dong, Y.; Li, W. Z. <i>Kristallogr. – New Cryst. Struct.</i> <b>2017</b> , 232, 599. [Ag <sub>2</sub> C <sub>12</sub> H <sub>16</sub> N <sub>12</sub> ](BrO <sub>3</sub> ) <sub>2</sub> ·2H <sub>2</sub> O                                    |
| BASLEM        | 1.634 Å | Paduan-Filho, A.; Sinn, E.; Chirico, R. D.; Carlin, R. L. <i>Inorg. Chem.</i> <b>1981</b> , 20, 2688. [Ni(ONC <sub>5</sub> H <sub>5</sub> ) <sub>6</sub> ](BrO <sub>3</sub> ) <sub>2</sub>                                                                        |
| DEYYAK        | 1.641 Å | Wurzenberger, M. H. H.; Szimhardt, N.; Stierstorfer, J. <i>Inorg. Chem.</i> <b>2018</b> , 57, 7940. [Cu <sub>2</sub> C <sub>12</sub> H <sub>24</sub> N <sub>24</sub> ] <sub>n</sub> (BrO <sub>3</sub> ) <sub>4</sub> ·H <sub>2</sub> O                            |
| JAXFOE        | 1.641 Å | Petrosyan, A. M.; Karapetyan, H. A.; Sukiasyan, R. P.; Aghajanyan, A. E.; Morgunov, V. G.; Kravchenko, E. A.; Bush, A. A. <i>J. Mol. Struct.</i> <b>2005</b> , 752, 144. (C <sub>6</sub> H <sub>15</sub> N <sub>4</sub> O <sub>2</sub> )BrO <sub>3</sub>          |
| UKEHEX        | 1.641 Å | Cingolani, A.; Effendy; Hanna, J. V.; Pellei, M.; Pettinari, C.; Santini, C.; Skelton, B. W.; White, A. H. <i>Inorg. Chem.</i> <b>2003</b> , 42, 4938. [Ag(As(C <sub>6</sub> H <sub>5</sub> ) <sub>3</sub> ) <sub>4</sub> ](BrO <sub>3</sub> )·CH <sub>3</sub> OH |
| VEQSAT        | 1.641 Å | Sharma, R. P.; Sharma, R.; Bala, R.; Venugopalan, P. <i>J. Mol. Struct.</i> <b>2006</b> , 789, 133. [Co(H <sub>2</sub> N(CH <sub>2</sub> ) <sub>2</sub> NH <sub>2</sub> ) <sub>2</sub> Cl <sub>2</sub> ](BrO <sub>3</sub> ) <sub>2</sub>                          |
| DEYXUD        | 1.643 Å | Wurzenberger, M. H. H.; Szimhardt, N.; Stierstorfer, J. <i>Inorg. Chem.</i> <b>2018</b> , 57, 7940. [Cu <sub>2</sub> C <sub>10</sub> H <sub>20</sub> N <sub>16</sub> O <sub>2</sub> ] <sub>n</sub> (BrO <sub>3</sub> ) <sub>2</sub>                               |
| EJOJAR        | 1.644 Å | Hull, K. L.; Schipper, D. E.; Oliver, A. G. <i>RSC Adv.</i> <b>2020</b> , 10, 44973. (n-C <sub>4</sub> H <sub>9</sub> ) <sub>4</sub> N)BrO <sub>3</sub> ·H <sub>2</sub> O                                                                                         |
| VITFOX        | 1.646 Å | Calabrese, M.; Pizzi, A.; Beccaria, R.; Frontera, A.; Resnati, G. <i>ChemPhysChem</i> <b>2023</b> , 202300298. (3-C <sub>5</sub> H <sub>5</sub> NO <sub>2</sub> )BrO <sub>3</sub>                                                                                 |
| 1302          | 1.648 Å | Abrahams, S. C.; Bernstein, J. L. <i>Acta Crystallogr., Sect. B</i> <b>1977</b> , 33, 3601. NaBrO <sub>3</sub>                                                                                                                                                    |
| 47173         | 1.648 Å | Templeton, D. H.; Templeton, L. K. <i>Acta Crystallogr., Sect. A</i> <b>1985</b> , 41, 133. KBrO <sub>3</sub>                                                                                                                                                     |
| DEYYIS        | 1.649 Å | Wurzenberger, M. H. H.; Szimhardt, N.; Stierstorfer, J. <i>Inorg. Chem.</i> <b>2018</b> , 57, 7940. [Cu((NH <sub>2</sub> ) <sub>2</sub> (CH <sub>2</sub> ) <sub>2</sub> (H <sub>2</sub> O) <sub>2</sub> )](BrO <sub>3</sub> ) <sub>2</sub>                        |
| 74767         | 1.651 Å | Szafranski, M.; Ståhl, K. Z. <i>Kristallogr.</i> <b>1994</b> , 209, 491. KBrO <sub>3</sub>                                                                                                                                                                        |
| 33760         | 1.652 Å | Kellersohn, T.; Lutz, H. D. Z. <i>Kristallogr.</i> <b>1990</b> , 193, 71. Sr(BrO <sub>3</sub> ) <sub>2</sub> ·H <sub>2</sub> O                                                                                                                                    |
| 47174         | 1.653 Å | Templeton, D. H.; Templeton, L. K. <i>Acta Crystallogr., Sect. A</i> <b>1985</b> , 41, 133. NaBrO <sub>3</sub>                                                                                                                                                    |
| 74768         | 1.653 Å | Szafranski, M.; Ståhl, K. Z. <i>Kristallogr.</i> <b>1994</b> , 209, 491. RbBrO <sub>3</sub>                                                                                                                                                                       |
| 113779        | 1.653 Å | Topić, F.; Marrett, J. M.; Borchers, T. H.; Titi, H. M.; Barrett, C. J.; Friščić, T. <i>Angew. Chem, Int. Ed.</i> <b>2021</b> , 60, 24400. Na <sub>3</sub> Br(BrO <sub>3</sub> ) <sub>2</sub> ·2H <sub>2</sub> O                                                  |



|             |                              |                                                                                                                                                                                                                                                                         |
|-------------|------------------------------|-------------------------------------------------------------------------------------------------------------------------------------------------------------------------------------------------------------------------------------------------------------------------|
| 74769       | 1.654 Å                      | Szafranski, M.; Ståhl, K. <i>Z. Kristallogr.</i> <b>1994</b> , <i>209</i> , 491. CsBrO <sub>3</sub>                                                                                                                                                                     |
| 66035       | 1.655 Å                      | Lutz, H. D.; Alici, E.; Kellersohn, T.; Kuske, P. <i>Z. Naturforsch., Sect. B</i> <b>1990</b> , <i>45</i> , 587. Ba(BrO <sub>3</sub> ) <sub>2</sub>                                                                                                                     |
| 61158       | 1.655 Å                      | Lutz, H. D.; Buchmeier, W.; Alici, E.; Eckers, W. <i>Z. Anorg. Allg. Chem.</i> <b>1985</b> , <i>529</i> , 46. Sr(BrO <sub>3</sub> ) <sub>2</sub>                                                                                                                        |
| 60906       | 1.657 Å                      | Lutz, H. D.; Alici, E.; Buchmeier, W. <i>Z. Anorg. Allg. Chem.</i> <b>1986</b> , <i>535</i> , 31. Ba(BrO <sub>3</sub> ) <sub>2</sub> ·H <sub>2</sub> O                                                                                                                  |
| 59180       | 1.662 Å                      | Lutz, H. D.; Alici, E.; Buchmeier, W. <i>Z. Anorg. Allg. Chem.</i> <b>1986</b> , <i>535</i> , 31. Sr(BrO <sub>3</sub> ) <sub>2</sub> ·H <sub>2</sub> O                                                                                                                  |
| 76966       | 1.670 Å                      | Rivoir, L.; Abad, M. <i>Anal. Real Sociedad Esp. Fis. Quim., Serie A</i> <b>1948</b> , <i>44</i> , 5-15. TlBrO <sub>3</sub>                                                                                                                                             |
| 33663       | 1.682 Å                      | Goldschmidt, V. M.; Barth, T.; Lunde, G. V. <i>Papers – Norweg. Acad. Sci. Lett., Sect I</i> <b>1928</b> , 1-165. KBrO <sub>3</sub>                                                                                                                                     |
| UKEHAT      | 1.690 Å                      | Cingolani, A.; Effendy; Hanna, J. V.; Pellei, M.; Pettinari, C.; Santini, C.; Skelton, B. W.; White, A. H. <i>Inorg. Chem.</i> <b>2003</b> , <i>42</i> , 4938. [Ag(As(C <sub>6</sub> H <sub>5</sub> ) <sub>3</sub> ) <sub>4</sub> ]BrO <sub>3</sub> ·CH <sub>3</sub> OH |
| <b>Mean</b> | <b>1.650 Å/27 structures</b> |                                                                                                                                                                                                                                                                         |

#### Perbromate ion, BrO<sub>4</sub><sup>-</sup>

| <i>ICSD code</i> | <i>d(Br-O)</i>              | <i>Reference</i>                                                                                                                                                                                                                                                                                                               |
|------------------|-----------------------------|--------------------------------------------------------------------------------------------------------------------------------------------------------------------------------------------------------------------------------------------------------------------------------------------------------------------------------|
| DEBSUY           | 1.580 Å                     | Beno, M. A.; Blackman, G. S.; Leung, P. C. W.; Carlson, K. D.; Copps, P. T.; Williams, J. M. <i>Mol. Cryst. Liq. Cryst.</i> <b>1985</b> , <i>119</i> , 409. (C <sub>10</sub> H <sub>8</sub> S <sub>8</sub> ) <sub>2</sub> (C <sub>10</sub> H <sub>8</sub> S <sub>8</sub> )(BrO <sub>4</sub> ) <sub>2</sub>                     |
| CIYFOF           | 1.581 Å                     | Williams, J. M.; Beno, B. A.; Wang, H.-H.; Reed, P. E.; Azevedo, L. J.; Schirber, J. E. <i>Inorg. Chem.</i> <b>1984</b> , <i>23</i> , 1790. (C <sub>10</sub> H <sub>8</sub> S <sub>8</sub> )(C <sub>10</sub> H <sub>8</sub> S <sub>8</sub> )BrO <sub>4</sub>                                                                   |
| BUYRAO10         | 1.611 Å                     | Beno, M. A.; Blackman, G. S.; Leung, P. C. W.; Carlson, K. D.; Copps, P. T.; Williams, J. M. <i>Mol. Cryst. Liq. Cryst.</i> <b>1985</b> , <i>119</i> , 409. (C <sub>10</sub> H <sub>8</sub> S <sub>8</sub> )(C <sub>10</sub> H <sub>8</sub> S <sub>8</sub> )BrO <sub>4</sub> ·0.5C <sub>2</sub> H <sub>3</sub> Cl <sub>3</sub> |
| CIYFOF01         | 1.614 Å                     | Williams, J. M.; Beno, B. A.; Wang, H.-H.; Reed, P. E.; Azevedo, L. J.; Schirber, J. E. <i>Inorg. Chem.</i> <b>1984</b> , <i>23</i> , 1790. (C <sub>10</sub> H <sub>8</sub> S <sub>8</sub> )(C <sub>10</sub> H <sub>8</sub> S <sub>8</sub> )BrO <sub>4</sub>                                                                   |
| RIDLAV           | 1.637 Å                     | Schindler, K.; Horner, J.; Demirci, G.; Cortat, Y.; Crochet, A.; Steiner, O. M.; Zobi, F. <i>Inorganics</i> <b>2023</b> , <i>11</i> , 139. [Re(N <sub>2</sub> C <sub>10</sub> H <sub>8</sub> ) <sub>2</sub> (CO) <sub>2</sub> ]BrO <sub>4</sub>                                                                                |
| <b>Mean</b>      | <b>1.605 Å/5 structures</b> |                                                                                                                                                                                                                                                                                                                                |

## Iodate ion, IO<sub>3</sub><sup>-</sup>

| ICSD/CSD code | d(I-O)  | Reference                                                                                                                                                                                                                                                                                                                                     |
|---------------|---------|-----------------------------------------------------------------------------------------------------------------------------------------------------------------------------------------------------------------------------------------------------------------------------------------------------------------------------------------------|
| IWECAR        | 1.768 Å | Casadevall, C.; Martin-Diaconescu, V.; Browne, W. R.; Fernandez, S.; Franco, F.; Cabello, N.; Benet-Buchholz, J.; Lassalle-Kaiser, B.; Lloret-Fillol, J. <i>Nature Chem.</i> <b>2021</b> , <i>13</i> , 800. [Ru(O <sub>2</sub> )C <sub>19</sub> H <sub>27</sub> N <sub>5</sub> ] <sub>2</sub> (PF <sub>6</sub> ) <sub>3</sub> IO <sub>3</sub> |
| LOFKOG        | 1.785 Å | Terzyan, S. S.; Petrosyan, A. M. <i>Kristallografiya</i> <b>1999</b> , <i>44</i> , 846. N(CH <sub>3</sub> ) <sub>4</sub> IO <sub>4</sub> ·2H <sub>2</sub> O                                                                                                                                                                                   |
| 20198         | 1.787 Å | Kalinin, V. P.; Ilyukhin, V. V.; Belov, N. V. <i>Dokl. Akad. Nauk SSSR</i> <b>1978</b> , <i>239</i> , 590. KIO <sub>3</sub>                                                                                                                                                                                                                   |
| 97995         | 1.790 Å | Kasatani, H.; Aoyagi, S.; Kuroiwa, Y.; Yagi, K.; Katayama, R.; Terauchi, H. <i>Nucl. Instr. Methods Phys. Res. B</i> <b>2003</b> , <i>199</i> , 49. KIO <sub>3</sub>                                                                                                                                                                          |
| 86285         | 1.792 Å | Chen, Y.; Zhang, P.-L.; Yan, Q.-W.; Cheng, Y.-F.; Cheng, Z.-X. <i>Wu Li Hsueh Pao</i> <b>1986</b> , <i>35</i> , 1102. K <sub>2</sub> (IO <sub>3</sub> )Cl·HIO <sub>3</sub>                                                                                                                                                                    |
| 201816        | 1.792 Å | Crettez, J. M.; Coquet, E.; Pannetier, J.; Bouillot, J.; Durand-Le Floch, M. <i>J. Solid State Chem.</i> <b>1985</b> , <i>56</i> , 133. LiIO <sub>3</sub>                                                                                                                                                                                     |
| EVAMIY        | 1.793 Å | Gholizadeh, M.; Maleki, B.; Pourayoubi, M.; Kia, M.; Notash, B. <i>Acta Crystallogr., Sect. E</i> <b>2011</b> , <i>67</i> , o1614. (C <sub>5</sub> H <sub>5</sub> N(CH <sub>2</sub> ) <sub>2</sub> NC <sub>5</sub> H <sub>5</sub> )(IO <sub>3</sub> ) <sub>2</sub>                                                                            |
| VITFAJ        | 1.793 Å | Calabrese, M.; Pizzi, A.; Beccaria, R.; Frontera, A.; Resnati, G. <i>ChemPhysChem</i> <b>2023</b> , 202300298. (C <sub>12</sub> H <sub>14</sub> N <sub>2</sub> )(IO <sub>3</sub> ) <sub>2</sub> ·2H <sub>2</sub> O                                                                                                                            |
| XUYGEF        | 1.793 Å | da Cunha, T. T.; Oliveira, W. X. C.; Pinheiro, C. B.; Pedroso, E. F.; Nunes, W. C.; Pereira, C. L. M. <i>Cryst. Growth Des.</i> <b>2016</b> , <i>16</i> , 900. C <sub>12</sub> H <sub>16</sub> N <sub>4</sub> (IO <sub>3</sub> ) <sub>2</sub> ·4H <sub>2</sub> O                                                                              |
| 2642          | 1.794 Å | Schulz, H. <i>Acta Crystallogr., Sect B</i> <b>1973</b> , <i>29</i> , 2285. LiIO <sub>3</sub>                                                                                                                                                                                                                                                 |
| 23772         | 1.794 Å | Chan, L. Y. Y.; Einstein, F. W. B. <i>Can. J. Chem.</i> <b>1971</b> , <i>49</i> , 468. KIO <sub>3</sub> ·HIO <sub>3</sub>                                                                                                                                                                                                                     |
| BAHKUT        | 1.794 Å | He, C.; Hooper, J. P.; Shreeve, J. M. <i>Inorg. Chem.</i> <b>2016</b> , <i>55</i> , 12844. C <sub>5</sub> H <sub>7</sub> I <sub>2</sub> N <sub>2</sub> (IO <sub>3</sub> )(HIO <sub>3</sub> )·H <sub>2</sub> O                                                                                                                                 |
| 9508          | 1.796 Å | Emiraliyev, A.; Kocharov, A. G.; Yamzin, I. I.; Lyubimtsev, V. A. <i>Kristallografiya</i> <b>1973</b> , <i>18</i> , 1177. LiIO <sub>3</sub>                                                                                                                                                                                                   |
| 70861         | 1.798 Å | Li, Q.; Liu, H.; Yu, H.; Hu, Z.; Wang, J.; Wu, Y.; Wu, H. <i>Inorg. Chem.</i> <b>2023</b> , <i>62</i> , 3896. KIO <sub>3</sub> ·MoO <sub>3</sub>                                                                                                                                                                                              |
| DOBCUV        | 1.799 Å | Marshall, W. G.; Jones, R. H.; Knight, K. S.; Pulham, C. R.; Smith, R. I. <i>Acta Crystallogr., Sect. C</i> <b>2019</b> , <i>75</i> , 152. ND <sub>4</sub> IO <sub>3</sub>                                                                                                                                                                    |
| VITFIR        | 1.799 Å | Calabrese, M.; Pizzi, A.; Beccaria, R.; Frontera, A.; Resnati, G. <i>ChemPhysChem</i> <b>2023</b> , 202300298. (H <sub>3</sub> N(CH <sub>2</sub> ) <sub>6</sub> NH <sub>3</sub> )(IO <sub>3</sub> ) <sub>2</sub> ·2H <sub>2</sub> O                                                                                                           |
| 35474         | 1.800 Å | Coquet, E.; Crettez, J. M.; Pannetier, J.; Bouillot, J.; Damien, J. C. <i>Acta Crystallogr., Sect. B</i> <b>1983</b> , <i>39</i> , 408. LiIO <sub>3</sub>                                                                                                                                                                                     |
| 35646         | 1.801 Å | Averbuch-Pouchot, M. T. <i>J. Solid State Chem.</i> <b>1983</b> , <i>49</i> , 368. NH <sub>4</sub> IO <sub>3</sub> ·Te(OH) <sub>6</sub> ·H <sub>2</sub> O                                                                                                                                                                                     |

|          |         |                                                                                                                                                                                                                   |
|----------|---------|-------------------------------------------------------------------------------------------------------------------------------------------------------------------------------------------------------------------|
| 156001   | 1.801 Å | Chen Xue An; Zhang Li; Chang Xi Nan; Xue Hai Ping; Zang Hegui; Xiao Wei Qiang; Song Xuemei; Yan Hui <i>J. Alloys Compd.</i> <b>2007</b> , 428, 54. $\text{KIO}_3 \cdot \text{MoO}_3$                              |
| 156006   | 1.801 Å | Chen, X.; Zhang L.; Chang X. N.; Xue H. P.; Zang H.; Xiao W. Q.; Song X.; Yan H. <i>J. Alloys Compd.</i> <b>2007</b> , 428, 54. $\text{LiIO}_3 \cdot \text{MoO}_3$                                                |
| 200669   | 1.801 Å | Kalinin, V.R.; Ilyukhin, V. V.; Belov, N. V. <i>Dokl. Akad. Nauk SSSR</i> <b>1978</b> , 241, 583. $\text{RbLi}_2(\text{IO}_3)_3$                                                                                  |
| 200793   | 1.801 Å | Soldatov, E. A.; Ilyukhin, V. V.; Kuz'min, E. A.; Belov, N. V. <i>Dokl. Akad. Nauk SSSR</i> <b>1980</b> , 252, 108. $\text{NH}_4(\text{IO}_3) \cdot 2\text{HIO}_3$                                                |
| BAHKON   | 1.801 Å | He, C.; Hooper, J. P.; Shreeve, J. M. <i>Inorg. Chem.</i> <b>2016</b> , 55, 12844. $\text{C}_9\text{H}_{10}\text{I}_4\text{N}_4(\text{IO}_3)_2 \cdot 3\text{H}_2\text{O}$                                         |
| VITFEN   | 1.801 Å | Calabrese, M.; Pizzi, A.; Beccaria, R.; Frontera, A.; Resnati, G. <i>ChemPhysChem</i> <b>2023</b> , 202300298. $(\text{H}_3\text{N}(\text{CH}_2)_4\text{NH}_3)(\text{IO}_3)_2 \cdot 2\text{H}_2\text{O}$          |
| 59317    | 1.802 Å | Peter, S.; Suchanek, E.; Roisnel, T.; Lutz, H.D. <i>Acta Crystallogr., Sect. C</i> <b>1998</b> , 54, 1064. $\text{Ca}(\text{IO}_3)_2 \cdot \text{H}_{1.82}\text{D}_{0.18}\text{O}$                                |
| BAWBAF03 | 1.802 Å | Chen, S. CCDC deposit number 2117179, <b>2022</b> . $(\text{H}_3\text{N}(\text{CH}_2)_2\text{NH}_3)\text{IO}_3$                                                                                                   |
| 40361    | 1.803 Å | Svensson, C.; Albertsson, J.; Liminga, R.; Kvik, Å.; Abrahams, S. C. <i>J. Chem. Phys.</i> <b>1983</b> , 78, 7343. $\text{LiIO}_3$                                                                                |
| 60907    | 1.803 Å | Lutz, H. D.; Alici, E.; Buchmeier, W. Z. <i>Anorg. Allgem. Chem.</i> <b>1986</b> , 535, 31. $\text{Ba}(\text{IO}_3) \cdot \text{H}_2\text{O}$                                                                     |
| 20858    | 1.804 Å | Sorokina, N. I.; Murodyan, L. A.; Loshmanov, A. A.; Fykin, L. E.; Rider, E. E.; Dobrzhanskii, G. F.; Simonov, V. I. <i>Kristallografiya</i> <b>1984</b> , 29, 220. $\text{NH}_4(\text{IO}_3) \cdot 2\text{HIO}_3$ |
| 23695    | 1.804 Å | Keve, E. T.; Abrahams, S. C.; Bernstein, J. L. <i>J. Chem. Phys.</i> <b>1971</b> , 54, 2556. $\text{NH}_4\text{IO}_3$                                                                                             |
| BAWBAF   | 1.804 Å | Abdallah, M. A. B.; Kamoun, S.; Bacchi, A.; Stefano, C. CCDC deposit number 1554555, <b>2017</b> . $(\text{H}_3\text{N}(\text{CH}_2)_2\text{NH}_3)\text{IO}_3$                                                    |
| 116865   | 1.805 Å | Huang, J.; Guo, F.; Guo, Z.; Chen, J.; Dai, B.; Yu, F. <i>Inorg. Chem.</i> <b>2022</b> , 61, 11803. $\text{NH}_4\text{IO}_3$                                                                                      |
| 200239   | 1.805 Å | Sorokina, N. I.; Ilyukhin, V. V.; Belov, N. V. <i>Dokl. Akad. Nauk SSSR</i> <b>1977</b> , 236, 1361. $\text{C}(\text{NH}_2)_3\text{IO}_3$                                                                         |
| 414608   | 1.805 Å | Sharma, R. P.; Bala, R.; Sharma, R.; Ferretti, V. <i>Inorg. Chim. Acta</i> <b>2005</b> , 358, 3457. $[\text{Co}(\text{NH}_3)_6]\text{Cl}_2(\text{IO}_3) \cdot \text{H}_2\text{O}$                                 |
| 420353   | 1.805 Å | Gautier Luneau, I.; Suffren, Y.; Jamet, H.; Pilme, J. Z. <i>Anorg. Allgem. Chem.</i> <b>2010</b> , 636, 1368. $\text{Cs}_2(\text{IO}_3) \cdot \text{I}_3\text{O}_8$                                               |
| GUPIOD   | 1.805 Å | Sorokina, N. I.; Ilyukhin, V. V.; Belov, N. V. <i>Dokl. Akad. Nauk SSSR</i> <b>1977</b> , 236, 1361. $\text{C}(\text{NH}_2)_3\text{IO}_3$                                                                         |
| DOBCUV01 | 1.805 Å | Huang, J.; Guo, F.; Guo, Z.; Chen, J.; Dai, B.; Yu, F. <i>Inorg. Chem.</i> <b>2022</b> , 61, 11803. $\text{ND}_4\text{IO}_3$                                                                                      |
| 1391     | 1.806 Å | Ghose, S.; Wan, C. <i>Acta Crystallogr., Sect. B</i> <b>1978</b> , 34, 84. $\text{Ca}(\text{IO}_3)_2$                                                                                                             |
| 35645    | 1.806 Å | Averbuch-Pouchot, M. T. <i>J. Solid State Chem.</i> <b>1983</b> , 49, 368. $\text{KIO}_3 \cdot \text{Te}(\text{OH})_6$                                                                                            |
| 35647    | 1.806 Å | Averbuch-Pouchot, M. T. <i>J. Solid State Chem.</i> <b>1983</b> , 49, 368. $(\text{KIO}_3)_2 \cdot \text{Te}(\text{OH})_6$                                                                                        |
| 36635    | 1.806 Å | Alici, E.; Schmidt, T.; Lutz, H. Z. <i>Anorg. Allgem. Chem.</i> <b>1992</b> , 608, 135. $\text{Ca}(\text{IO}_3)_2 \cdot 2\text{H}_2\text{O}$                                                                      |

|        |         |                                                                                                                                                                                                                                                |
|--------|---------|------------------------------------------------------------------------------------------------------------------------------------------------------------------------------------------------------------------------------------------------|
| 131739 | 1.806 Å | Shi, T.; Zhang, F.; Li, Y.; Gao, L.; Yang, Z.; Pan, S. <i>Inorg. Chem.</i> <b>2020</b> , <i>59</i> , 3034. Na <sub>3</sub> (IO <sub>3</sub> )(MoO <sub>4</sub> )                                                                               |
| 13700  | 1.807 Å | Fan, H.; Peng, G.; Lin, C.; Chen, K.; Yang, S.; Ye, N. <i>Inorg. Chem.</i> <b>2020</b> , <i>59</i> , 7376. Ba(IO <sub>3</sub> )F                                                                                                               |
| 14045  | 1.807 Å | Kalinin, V. P.; Karataeva, I. M.; Vinogradov, E. E.; Vavilin, V. I.; Plyukhin, V. V.; Pakhomov, V. I. <i>Koord. Khim.</i> <b>1978</b> , <i>4</i> , 444. RbLi <sub>2</sub> (IO <sub>3</sub> ) <sub>3</sub>                                      |
| 61176  | 1.807 Å | Lucas, B. W. <i>Acta Crystallogr., Sect. C</i> <b>1985</b> , <i>41</i> , 1388. KIO <sub>3</sub>                                                                                                                                                |
| 62499  | 1.807 Å | Sorokina, N. I.; Loshmanov, A. A.; Fykin, L. E.; Rider, E. E. <i>Kristallografiya</i> <b>1985</b> , <i>30</i> , 895. KIO <sub>3</sub> ·HIO <sub>3</sub>                                                                                        |
| 80025  | 1.807 Å | Cheng, Y.-F.; Yang, Z.; Cheng, Z.-X.; Guo, L.-P. <i>Jiegon Huaxue</i> <b>1995</b> , <i>14</i> , 11. LiIO <sub>3</sub>                                                                                                                          |
| 80026  | 1.807 Å | Cheng, Y.-F.; Yang, Z.; Cheng, Z.-X.; Guo, L.-P. <i>Jiegon Huaxue</i> <b>1995</b> , <i>14</i> , 11. LiIO <sub>3</sub>                                                                                                                          |
| 132694 | 1.807 Å | Gai, M.; Tong, T.; Wang, Y.; Yang, Z.; Pan, S. <i>Chem. Mater.</i> <b>2020</b> , <i>32</i> , 5723. Sr <sub>2</sub> (IO <sub>3</sub> ) <sub>4</sub>                                                                                             |
| 405832 | 1.807 Å | Suchanek, E.; Peter, S.; Lutz, H. D. <i>J. Mol. Struct.</i> <b>1997</b> , <i>416</i> , 249. [Ca(H <sub>2</sub> O) <sub>6</sub> ](IO <sub>3</sub> ) <sub>2</sub>                                                                                |
| ICAYEQ | 1.807 Å | Petrosyan, A. M.; Burbelo, V. M.; Tamazyan, R. A.; Karapetyan, H. A.; Sukiasyan, R. P. <i>Z. Naturforsch., Teil B</i> <b>2000</b> , <i>55</i> , 119. (H <sub>3</sub> NCH <sub>3</sub> CHCOOH)IO <sub>3</sub> ·H <sub>2</sub> O                 |
| 2825   | 1.808 Å | Alcock, N. W. <i>Acta Crystallogr., Sect. B</i> <b>1972</b> , <i>28</i> , 2783. RbIO <sub>3</sub>                                                                                                                                              |
| 20168  | 1.808 Å | Sorokina, N. I.; Ilyukhin, V. V.; Pakhomov, V. I.; Belov, N. V. <i>Dokl. Akad. Nauk SSSR</i> <b>1979</b> , <i>249</i> , 613. NaIO <sub>3</sub>                                                                                                 |
| 47138  | 1.808 Å | Podlahova, J.; Loub, J.; Pechar, F.; Petricek, V. <i>Acta Crystallogr., Sect. C</i> <b>1984</b> , <i>40</i> , 1999. KIO <sub>3</sub> ·Te(OH) <sub>6</sub>                                                                                      |
| 131558 | 1.808 Å | Jo, H.; Kim, H. G.; Byun, H. R.; Jang, J. I.; Ok, K. M. <i>J. Solid State Chem.</i> <b>2020</b> , <i>282</i> , 121120. KLi <sub>2</sub> (IO <sub>3</sub> ) <sub>3</sub>                                                                        |
| 200804 | 1.808 Å | Soldatov, E. A.; Ilyukhin, V. V.; Kuz'min, E. A.; Belov, N. V. <i>Dokl. Akad. Nauk SSSR</i> <b>1980</b> , <i>252</i> , 615. Rb(IO <sub>3</sub> ) <sub>2</sub> ·2HIO <sub>3</sub>                                                               |
| 202679 | 1.808 Å | Svensson, C.; Ståhl, K. <i>J. Solid State Chem.</i> <b>1988</b> , <i>77</i> , 112. NaIO <sub>3</sub>                                                                                                                                           |
| ICAYAM | 1.808 Å | Petrosyan, A. M.; Burbelo, V. M.; Tamazyan, R. A.; Karapetyan, H. A.; Sukiasyan, R. P. <i>Z. Naturforsch., Teil B</i> <b>2000</b> , <i>55</i> , 119. (H <sub>3</sub> N(CH <sub>2</sub> ) <sub>2</sub> COOH)IO <sub>3</sub> ·H <sub>2</sub> O   |
| 14344  | 1.809 Å | de Boer, J. L.; van Bolhuis, F.; Olthof-Hazekamp, R.; Vos, A. <i>Acta Crystallogr.</i> <b>1966</b> , <i>21</i> , 841. LiIO <sub>3</sub>                                                                                                        |
| 420354 | 1.809 Å | Gautier Luneau, I.; Suffren, Y.; Jamet, H.; Pilme, J. <i>Z. Anorg. Allgem. Chem.</i> <b>2010</b> , <i>636</i> , 1368. Rb <sub>2</sub> (IO <sub>3</sub> )(I <sub>3</sub> O <sub>8</sub> )·2HIO <sub>3</sub> ·H <sub>2</sub> O                   |
| 10306  | 1.810 Å | Kemper, G.; Vos, A.; Rietveld, H. M. <i>Can. J. Chem.</i> <b>1972</b> , <i>50</i> , 1134. KIO <sub>3</sub> ·HIO <sub>3</sub>                                                                                                                   |
| 23276  | 1.810 Å | Petricek, V.; Maly, K.; Kratochvil, B.; Podlahova, J.; Loub, J. <i>Acta Crystallogr., Sect. B</i> <b>1980</b> , <i>36</i> , 2130. Ba(IO <sub>3</sub> ) <sub>2</sub>                                                                            |
| QEYYUR | 1.810 Å | Abdallah, M. A. B. <i>J. Mol. Struct.</i> <b>2018</b> , <i>76</i> , 1171. (H <sub>3</sub> N(CH <sub>2</sub> ) <sub>2</sub> NH <sub>2</sub> (CH <sub>2</sub> ) <sub>2</sub> NH <sub>3</sub> )(IO <sub>3</sub> ) <sub>3</sub> ·2H <sub>2</sub> O |
| 48721  | 1.811 Å | Ma, W.; Huang, J.; Dai, B.; Yu, F. <i>New. J. Chem.</i> <b>2022</b> , <i>46</i> , 12482. Ba(IO <sub>3</sub> ) <sub>2</sub> ·HI <sub>2</sub> O <sub>6</sub>                                                                                     |

|        |         |                                                                                                                                                                                                                                                                                                  |
|--------|---------|--------------------------------------------------------------------------------------------------------------------------------------------------------------------------------------------------------------------------------------------------------------------------------------------------|
| 200717 | 1.811 Å | Kalinin, V. R.; Ilyukhin, V. V.; Pakhomov, V. I.; Belov, N. V. <i>Dokl. Akad. Nauk SSSR</i> <b>1978</b> , 239, 318. KIO <sub>3</sub> ·HIO <sub>3</sub>                                                                                                                                           |
| RINQOY | 1.811 Å | Chen, Q.-Q.; Hu, C.-L.; Zhang, M.-Z.; Li, B.-X.; Mao, J.-G. <i>Inorg. Chem.</i> <b>2023</b> , 62, 12613. (C <sub>4</sub> H <sub>5</sub> N <sub>2</sub> O)IO <sub>3</sub> ·HIO <sub>3</sub>                                                                                                       |
| 20209  | 1.812 Å | Kalinin, V.R.; Ilyukhin, V. V.; Belov, N. V. <i>Dokl. Akad. Nauk SSSR</i> <b>1978</b> , 239, 1340. K <sub>2</sub> (IO <sub>3</sub> )(NO <sub>3</sub> )·2HIO <sub>3</sub>                                                                                                                         |
| 202145 | 1.812 Å | Bordet, P.; Boucherle, J. X.; Santoro, A.; Marezio, M. <i>Solid State Ionics</i> <b>1986</b> , 21, 243. NH <sub>4</sub> (IO <sub>3</sub> )·2HIO <sub>3</sub>                                                                                                                                     |
| 238104 | 1.812 Å | Xu, X.; Yang, B.-P.; Huang, C.; Mao, J.-G. <i>Inorg. Chem.</i> <b>2014</b> , 53, 1756. [Rb(IO <sub>3</sub> )(HIO <sub>3</sub> ) <sub>2</sub>                                                                                                                                                     |
| 423584 | 1.812 Å | Belokoneva, E. L.; Stefanovich, S. Y.; Dimitrova, O. V. <i>J. Solid State Chem.</i> <b>2012</b> , 195, 79. KIO <sub>3</sub>                                                                                                                                                                      |
| GUCCUD | 1.812 Å | Boldog, I.; Daran, J.-C.; Chernega, A. N.; Rusanov, E. B.; Krautscheid, H.; Domasevitch, K. V. <i>Cryst. Growth Des.</i> <b>2009</b> , 9, 2895. (C <sub>6</sub> H <sub>8</sub> N <sub>4</sub> ) <sub>3</sub> (IO <sub>3</sub> ) <sub>6</sub> (HIO <sub>3</sub> ) <sub>2</sub> ·2H <sub>2</sub> O |
| 61009  | 1.813 Å | Wang, C.-G. <i>Hua Hsueh Hsueh Pao</i> <b>1985</b> , 43, 271. CsIO <sub>3</sub>                                                                                                                                                                                                                  |
| YUMPII | 1.813 Å | Abdallah, M. A. B.; Bacchi, A.; Parisini, A.; Canossa, S.; Bergamonti, L.; Balestri, D.; Kamoun, S. <i>J. Mol. Struct.</i> <b>2020</b> , 1215, 128254.                                                                                                                                           |
| 202144 | 1.814 Å | Bordet, P.; Boucherle, J. X.; Santoro, A.; Marezio, M. <i>Solid State Ionics</i> <b>1986</b> , 21, 243. NH <sub>4</sub> (IO <sub>3</sub> )·2HIO <sub>3</sub>                                                                                                                                     |
| 280857 | 1.814 Å | Sykora, R.E.; Ok, K. M.; Halasyamani, P. S.; Albrecht Schmitt, T. E. <i>J. Am. Chem. Soc.</i> <b>2002</b> , 124, 1951. KIO <sub>3</sub> ·MoO <sub>3</sub>                                                                                                                                        |
| 280859 | 1.814 Å | Sykora, R.E.; Ok, K. M.; Halasyamani, P. S.; Albrecht Schmitt, T. E. <i>J. Am. Chem. Soc.</i> <b>2002</b> , 124, 1951. CsIO <sub>3</sub> ·MoO <sub>3</sub>                                                                                                                                       |
| 410914 | 1.814 Å | Engelen, B.; Gavrilko, T.; Panthoefler, M.; Puchkovskaya, G.; Sekirin, I. <i>J. Mol. Struct.</i> <b>2000</b> , 523, 163. KIO <sub>3</sub> ·HIO <sub>3</sub>                                                                                                                                      |
| 416527 | 1.814 Å | Gerken, M.; Hazendonk, P.; Iuga, A.; Mack, J. P.; Mercier, H. P. A.; Schrobilgen, G. J. D. <i>J. Fluor. Chem.</i> <b>2006</b> , 127, 1328. (CH <sub>3</sub> ) <sub>4</sub> N(IO <sub>3</sub> )                                                                                                   |
| HIRMOK | 1.814 Å | Petrosyan, A. M.; Sukiasyan, R. P.; Terzyan, S. S.; Burbelo, V. M. <i>Acta Crystallogr., Sect. B</i> <b>1999</b> , 55, 221. (C <sub>6</sub> H <sub>16</sub> NO <sub>2</sub> )(HI <sub>2</sub> O <sub>6</sub> )IO <sub>3</sub>                                                                    |
| REWRUH | 1.814 Å | Gerken, M.; Hazendonk, P.; Iuga, A.; Mack, J. P.; Mercier, H. P.A.; Schrobilgen, G. J. <i>J. Fluorine Chem.</i> <b>2006</b> , 127, 1328. N(CH <sub>3</sub> ) <sub>4</sub> IO <sub>4</sub>                                                                                                        |
| 49187  | 1.815 Å | Hou, Y.; Li, H.; Wu, H.; Yu, H.; Hu, Z.; Wang, J.; Wu, Y. <i>Dalton Trans.</i> <b>2022</b> , 51, 14036. Ba <sub>2</sub> (WO <sub>3</sub> F(IO <sub>3</sub> ))(WO <sub>3</sub> F <sub>2</sub> )                                                                                                   |
| DIRWEK | 1.815 Å | Zhang, L.; Zhang, X.; Liang, F.; Hu, Z.; Wu, Y. <i>Inorg. Chem.</i> <b>2023</b> , 62, 14518. (C <sub>5</sub> H <sub>6</sub> N <sub>3</sub> O <sub>2</sub> )IO <sub>3</sub>                                                                                                                       |
| 42347  | 1.816 Å | Chen, J.; Hu, C.-L.; Li, Y.-L.; Chen, Q.-Q.; Li, B.-X.; Mao, J.-G. <i>J. Alloys Compd.</i> <b>2022</b> , 894, 162547. NaIO <sub>3</sub> ·MoO <sub>3</sub>                                                                                                                                        |

|             |                               |                                                                                                                                                                                                                                                                   |
|-------------|-------------------------------|-------------------------------------------------------------------------------------------------------------------------------------------------------------------------------------------------------------------------------------------------------------------|
| 42348       | 1.816 Å                       | Chen, J.; Hu, C.-L.; Li, Y.-L.; Chen, Q.-Q.; Li, B.-X.; Mao, J.-G. <i>J. Alloys Compd.</i> <b>2022</b> , <i>894</i> , 162547. $\text{KIO}_3 \cdot \text{MoO}_3$                                                                                                   |
| 14377       | 1.817 Å                       | Rosenzweig, A.; Morosin, B. <i>Acta Crystallogr.</i> <b>1966</b> , <i>21</i> , 758. $\text{LiIO}_3$                                                                                                                                                               |
| 15564       | 1.818 Å                       | MacGillavry, C. H.; Panthaleon van Eck, C. L. <i>Rec. Trav. Chim. Pays-Bas Belg.</i> <b>1943</b> , <i>62</i> , 729. $\text{NaIO}_3$                                                                                                                               |
| 166893      | 1.818 Å                       | Yang, B.; Hu, C.; Xu, X.; Sun, C. F.; Zhang, J. H.; Mao, J. G. <i>Chem. Mater.</i> <b>2010</b> , <i>22</i> , 1545. $\text{Na}(\text{VO}_2)(\text{IO}_3)_2 \cdot \text{H}_2\text{O}$                                                                               |
| 423864      | 1.819 Å                       | Bayarjargal, L.; Wiehl, L.; Friedrich, A.; Winkler, B.; Juarez-Arellano, E. A.; Morgenroth, W.; Haussuehl, E. <i>J. Physics: Condensed Matter</i> <b>2012</b> , <i>24</i> , 325401-11. $\text{KIO}_3$                                                             |
| 280858      | 1.820 Å                       | Sykora, R.E.; Ok, K. M.; Halasyamani, P. S.; Albrecht Schmitt, T. E. <i>J. Am. Chem. Soc.</i> <b>2002</b> , <i>124</i> , 1951. $\text{RbIO}_3 \cdot \text{MoO}_3$                                                                                                 |
| OVULAT      | 1.820 Å                       | Saidi, K.; Kamoun, S.; Ayedi, H. F. <i>J. Chem. Cryst.</i> <b>2011</b> , <i>41</i> , 1258. $(\text{H}_3\text{N}(\text{CH}_2)_2\text{NH}_3)(\text{IO}_3)_2 \cdot 4\text{HIO}_3$                                                                                    |
| OVULAT01    | 1.821 Å                       | Chen, S. CCDC deposition number 2117178, <b>2022</b> . $(\text{H}_3\text{N}(\text{CH}_2)_2\text{NH}_3)(\text{IO}_3)_2 \cdot 4\text{HIO}_3$                                                                                                                        |
| ICAYIU      | 1.823 Å                       | Petrosyan, A. M.; Burbelo, V. M.; Tamazyanyan, R. A.; Karapetyan, H. A.; Sukiasyan, R. P. <i>Z. Naturforsch., Teil B</i> <b>2000</b> , <i>55</i> , 119. $(\text{H}_3\text{N}(\text{CH}_2)_4\text{CH}(\text{NH}_3)\text{COOH})(\text{IO}_3)_2 \cdot 4\text{HIO}_3$ |
| 133563      | 1.823 Å                       | Chen, J.; Hu, C.-L.; Zhang, X.-H.; Li, B.-X.; Yang, B.-P.; Mao, J.-G. <i>Angew. Chem., Int. Ed.</i> <b>2020</b> , <i>59</i> , 5381. $\text{CsVO}_2\text{F}(\text{IO}_3)$                                                                                          |
| VIQKAK      | 1.823 Å                       | Peng, G. CCDC deposition number 1878308, <b>2018</b> . $\text{Li}_4\text{Sr}_5(\text{H}_4\text{B}_{12}\text{O}_{26})(\text{IO}_3)_2$                                                                                                                              |
| 140980      | 1.824 Å                       | An, Y.; Zhong, Y.; Sun, T.; Wang, H.; Hu, Z.; Liu, H.; Liu, S.; Kong, Y.; Xu, J. <i>Dalton Trans.</i> <b>2019</b> , <i>48</i> , 13074. $\text{Sr}(\text{IO}_3)_2 \cdot \text{HIO}_3$                                                                              |
| 127048      | 1.825 Å                       | Kampf, A. R.; Harlow, G. E.; Ma, C. <i>Miner. Magaz.</i> <b>2023</b> , <i>87</i> , 171. $\text{Pb}_7(\text{IO}_3)(\text{OH})_4\text{Cl}_9$                                                                                                                        |
| 130347      | 1.825 Å                       | Li, Y.; Han, G.; Yu, H.; Li, H.; Yang, Z.; Pan, S. <i>Chem. Mater.</i> <b>2019</b> , <i>31</i> , 2992. $\text{NH}_4\text{IO}_3 \cdot \text{MoO}_3$                                                                                                                |
| 238105      | 1.825 Å                       | Xu, X.; Yang, B.-P.; Huang, C.; Mao, J.-G. <i>Inorg. Chem.</i> <b>2014</b> , <i>53</i> , 1756. $[\text{Rb}_3(\text{IO}_3)_3(\text{I}_2\text{O}_5)(\text{HIO}_3)_4 \cdot \text{H}_2\text{O}]$                                                                      |
| BAWBAF01    | 1.828 Å                       | Abdallah, M. A. B.; Bacchi, A.; Parisini, A.; Canossa, S.; Mazzeo, P. P.; Bergamonti, L.; Kamoun, S. <i>Struct. Chem.</i> <b>2019</b> , <i>30</i> , 1911. $(\text{H}_3\text{N}(\text{CH}_2)_2\text{NH}_3)\text{IO}_3$                                             |
| 140979      | 1.831 Å                       | An, Y.; Zhong, Y.; Sun, T.; Wang, H.; Hu, Z.; Liu, H.; Liu, S.; Kong, Y.; Xu, J. <i>Dalton Trans.</i> <b>2019</b> , <i>48</i> , 13074. $\text{Ca}(\text{IO}_3)_2 \cdot \text{HIO}_3$                                                                              |
| 247719      | 1.832 Å                       | Bayarjargal, L.; Wiehl, L.; Friedrich, A.; Winkler, B.; Juarez-Arellano, E. A.; Morgenroth, W.; Haussuehl, E. <i>J. Physics: Condensed Matter</i> <b>2012</b> , <i>24</i> , 325401-11. $\text{KIO}_3$                                                             |
| <b>Mean</b> | <b>1.808 Å/100 structures</b> |                                                                                                                                                                                                                                                                   |



## Metaperiodate ion, IO<sub>4</sub><sup>-</sup>

| ICSD/CSD code | d(I-O)  | Reference                                                                                                                                                                                                                                                                                                                                    |
|---------------|---------|----------------------------------------------------------------------------------------------------------------------------------------------------------------------------------------------------------------------------------------------------------------------------------------------------------------------------------------------|
| BUAMPI        | 1.672 Å | Carpy, A.; Goursolle, M.; Leger, J. M.; Nivaud, E. <i>KC. R. Acad. Sci., Ser. C (Chim)</i> <b>1977</b> , 285, 311. N(C <sub>4</sub> H <sub>9</sub> ) <sub>4</sub> IO <sub>4</sub>                                                                                                                                                            |
| ROQLIS        | 1.668 Å | Belaj, F.; Trnoska, A.; Nachbaur, E. <i>Z. Kristallogr.</i> <b>1997</b> , 212, 355. [NaO <sub>6</sub> C <sub>18</sub> H <sub>36</sub> N <sub>2</sub> ]IO <sub>4</sub>                                                                                                                                                                        |
| VAVTAO        | 1.693 Å | Campos-Fernandez, C. S.; Schottel, B. L.; Chifotides, H. T.; Bera, J. K.; Bacsá, J.; Koomen, J. M.; Russell, D. H.; Dunbar, K. R. <i>J. Am. Chem. Soc.</i> <b>2005</b> , 127, 12909. [Ni <sub>4</sub> C <sub>56</sub> H <sub>52</sub> N <sub>28</sub> O <sub>48</sub> ]ClO <sub>4</sub> (IO <sub>4</sub> ) <sub>7</sub> ·3CH <sub>3</sub> CN |
| UYEMOB        | 1.725 Å | Rezaeifard, A.; Jafarpour, M.; Kavousi, H.; Alipour, M.; Stoeckli-Evans, H. <i>Polyhedron</i> <b>2011</b> , 30, 2303. N((n-C <sub>4</sub> H <sub>9</sub> ) <sub>3</sub> CH <sub>2</sub> C <sub>6</sub> H <sub>5</sub> )IO <sub>4</sub>                                                                                                       |
| NEGVAZ        | 1.728 Å | Liu, Y.; Chen, Y.; Xu, M.-J.; Zhu, C.-L.; Liu, Z.-Q. <i>J. Mol. Struct.</i> <b>2017</b> , 1148, 429. (C <sub>6</sub> H <sub>7</sub> N <sub>2</sub> O <sub>2</sub> )IO <sub>4</sub> ·C <sub>12</sub> H <sub>24</sub> O <sub>6</sub>                                                                                                           |
| EVIHIC        | 1.731 Å | Liu, Z.-Q.; Liu, Y.; Chen, Y.; Zhao, W.-Q.; Fang, W.-N. <i>Chin. Chem. Lett.</i> <b>2016</b> , 28, 297. (C <sub>6</sub> H <sub>7</sub> N <sub>2</sub> O <sub>2</sub> )IO <sub>4</sub> ·C <sub>12</sub> H <sub>24</sub> O <sub>6</sub> ·0.5CH <sub>3</sub> OH                                                                                 |
| HOHMOG01      | 1.735 Å | Maluszynska, H.; Czarnecki, P.; Lewicki, S.; Wasicki, J.; Gdaniec, M. <i>J. Phys.: Condens. Matter</i> <b>2001</b> , 13, 11053. (C <sub>5</sub> H <sub>6</sub> N)IO <sub>4</sub>                                                                                                                                                             |
| HOHMOG02      | 1.737 Å | Maluszynska, H.; Czarnecki, P.; Lewicki, S.; Wasicki, J.; Gdaniec, M. <i>J. Phys.: Condens. Matter</i> <b>2001</b> , 13, 11053. (C <sub>5</sub> H <sub>6</sub> N)IO <sub>4</sub>                                                                                                                                                             |
| ZZZUYA02      | 1.738 Å | Wagner, R. I.; Bau, R.; Gnann, R. Z.; Jones, P. F.; Christe, K. O. <i>Inorg. Chem.</i> <b>1997</b> , 36, 2564. N(CH <sub>3</sub> ) <sub>4</sub> IO <sub>4</sub>                                                                                                                                                                              |
| HOHMOG04      | 1.745 Å | Maluszynska, H.; Czarnecki, P.; Lewicki, S.; Wasicki, J.; Gdaniec, M. <i>J. Phys.: Condens. Matter</i> <b>2003</b> , 15, 5663. (C <sub>5</sub> H <sub>6</sub> N)IO <sub>4</sub>                                                                                                                                                              |
| YASKIP        | 1.745 Å | You, Y.-M.; Tang, Y.-Y.; Li, P.-F.; Zhang, H.-Y.; Zhang, W.-Y.; Zhang, Y.; Ye, H.-Y.; Nakamura, T.; Xiong, R.-G. <i>Nature Commun.</i> <b>2017</b> , 8, 14934. (C <sub>4</sub> H <sub>14</sub> N)IO <sub>4</sub>                                                                                                                             |
| 83375         | 1.747 Å | de Waal, D.; Zabel, M.; Range, K. <i>J. Naturforschung, Teil B</i> <b>1996</b> , 51, 441-443. CsIO <sub>4</sub>                                                                                                                                                                                                                              |
| 89509         | 1.748 Å | Hoppe, R.; Fischer, D.; Schneider, J. <i>Z. Anorg. Allgem. Chem.</i> <b>1999</b> , 625, 1135-1142. CsIO <sub>4</sub>                                                                                                                                                                                                                         |
| HOHMOG03      | 1.750 Å | Maluszynska, H.; Czarnecki, P.; Lewicki, S.; Wasicki, J.; Gdaniec, M. <i>J. Phys.: Condens. Matter</i> <b>2001</b> , 13, 11053. (C <sub>5</sub> H <sub>6</sub> N)IO <sub>4</sub>                                                                                                                                                             |
| IKAMUD        | 1.750 Å | Jin-Gang Hu, J.-G. <i>Acta Crystallogr., Sect. E</i> <b>2011</b> , 67, o472. (C <sub>3</sub> H <sub>10</sub> NO)IO <sub>4</sub> ·C <sub>12</sub> H <sub>24</sub> O <sub>6</sub>                                                                                                                                                              |
| UYOBEQ        | 1.750 Å | Sharma, R. P.; Singh, A.; Brandao, P.; Felix, V.; Venugopalan, P. <i>Inorg. Chim. Acta</i> <b>2011</b> , 376, 64. [Co(N <sub>2</sub> C <sub>12</sub> H <sub>8</sub> ) <sub>2</sub> (C <sub>6</sub> H <sub>5</sub> N <sub>4</sub> )](IO <sub>4</sub> ) <sub>2</sub> ·0.5H <sub>2</sub> O                                                      |

|          |         |                                                                                                                                                                                                                                                                                                               |
|----------|---------|---------------------------------------------------------------------------------------------------------------------------------------------------------------------------------------------------------------------------------------------------------------------------------------------------------------|
| HOHMOG07 | 1.751 Å | Maluszynska, H.; Czarnecki, P.; Lewicki, S.; Wasicki, J.; Gdaniec, M. <i>J. Phys.: Condens. Matter</i> <b>2003</b> , <i>15</i> , 5663. (C <sub>5</sub> H <sub>6</sub> N)IO <sub>4</sub>                                                                                                                       |
| BEKNIS   | 1.751 Å | Calabrese, M.; Pizzi, A.; Daolio, A.; Frontera, A.; Resnati, G. <i>Chem. Commun.</i> <b>2022</b> , <i>58</i> , 9274. (C <sub>6</sub> H <sub>5</sub> N <sub>2</sub> )IO <sub>4</sub>                                                                                                                           |
| HOHMOG06 | 1.752 Å | Maluszynska, H.; Czarnecki, P.; Lewicki, S.; Wasicki, J.; Gdaniec, M. <i>J. Phys.: Condens. Matter</i> <b>2003</b> , <i>15</i> , 5663. (C <sub>5</sub> H <sub>6</sub> N)IO <sub>4</sub>                                                                                                                       |
| HOHMOG   | 1.752 Å | Dutkiewicz, G.; Pajak, Z. <i>Z. Naturforsch., Teil B</i> <b>1998</b> , <i>53</i> , 1323. (C <sub>5</sub> H <sub>6</sub> N)IO <sub>4</sub>                                                                                                                                                                     |
| UNUREB   | 1.752 Å | Gholizadeh, M.; Zonoz, F. M.; Pourayoubi, M.; Ebrahimpour, M.; Salehabadi, M. <i>Acta Crystallogr., Sect. E</i> <b>2011</b> , <i>67</i> , o863. ((C <sub>6</sub> H <sub>5</sub> ) <sub>3</sub> P(CH <sub>2</sub> ) <sub>2</sub> P(C <sub>6</sub> H <sub>5</sub> ) <sub>3</sub> )IO <sub>4</sub>               |
| IHEGUZ   | 1.753 Å | Salchner, R.; Laus, G.; Haslinger, S.; Kahlenberg, V.; Wurst, K.; Braun, D. E.; Vergeiner, S.; Kopacka, H.; Schottenberger, H.; Puckowski, A.; Markiewicz, M.; Stolte, S.; Nerdinger, S. <i>Heterocycles</i> <b>2015</b> , <i>90</i> , 1018. (C <sub>6</sub> H <sub>14</sub> NO <sub>2</sub> )IO <sub>4</sub> |
| BEKNOY   | 1.755 Å | Calabrese, M.; Pizzi, A.; Daolio, A.; Frontera, A.; Resnati, G. <i>Chem. Commun.</i> <b>2022</b> , <i>58</i> , 9274. (C <sub>5</sub> H <sub>5</sub> N <sub>2</sub> O <sub>2</sub> )IO <sub>4</sub>                                                                                                            |
| BEKPAM   | 1.756 Å | Calabrese, M.; Pizzi, A.; Daolio, A.; Frontera, A.; Resnati, G. <i>Chem. Commun.</i> <b>2022</b> , <i>58</i> , 9274. (C <sub>5</sub> H <sub>5</sub> FN)IO <sub>4</sub>                                                                                                                                        |
| 83365    | 1.759 Å | de Waal, D.; Range, K. <i>J. Naturforschung, Teil B</i> <b>1996</b> , <i>51</i> , 1365-1367. RbIO <sub>4</sub>                                                                                                                                                                                                |
| JOWRIY   | 1.759 Å | Ding, X.-H.; Wang, S.; Li, Y.-H.; Huang, W. <i>J. Mol. Struct.</i> <b>2015</b> , <i>1079</i> , 266. (C <sub>9</sub> H <sub>13</sub> N <sub>2</sub> )IO <sub>4</sub>                                                                                                                                           |
| UZUQUC   | 1.760 Å | Abate, A.; Marti-Rujas, J.; Metrangolo, P.; Pilati, T.; Resnati, G.; Terraneo, G. <i>Cryst. Growth Des.</i> <b>2011</b> , <i>11</i> , 4220. (N(n-C <sub>4</sub> H <sub>9</sub> ) <sub>4</sub> )IO <sub>4</sub> ·1.5C <sub>6</sub> F <sub>4</sub> I <sub>2</sub>                                               |
| BEKNUE   | 1.760 Å | Calabrese, M.; Pizzi, A.; Daolio, A.; Frontera, A.; Resnati, G. <i>Chem. Commun.</i> <b>2022</b> , <i>58</i> , 9274. (C <sub>6</sub> H <sub>6</sub> NO <sub>2</sub> )IO <sub>4</sub>                                                                                                                          |
| TEJBET01 | 1.760 Å | Yu, Z.-H.; Liu, D.-X.; Ling, Y.-Y.; Chen, X.-X.; Shang, Y.; Chen, S.-L.; Ye, Z.-M.; Zhang, W.-X.; Chen, X.-M. <i>Sci. China Mater.</i> <b>2023</b> , <i>66</i> , 1641. K(C <sub>6</sub> H <sub>14</sub> N <sub>2</sub> )(IO <sub>4</sub> ) <sub>3</sub>                                                       |
| 83377    | 1.761 Å | de Waal, D.; Range, K. <i>J. Naturforschung, Teil B</i> <b>1996</b> , <i>51</i> , 444-446. KIO <sub>4</sub>                                                                                                                                                                                                   |
| 400552   | 1.761 Å | Kraft, T.; Jansen, M. <i>Z. Anorg. Allgem. Chem.</i> <b>1995</b> , <i>621</i> , 484-487. LiIO <sub>4</sub>                                                                                                                                                                                                    |
| KEJTAX   | 1.761 Å | Sharninghausen, L. S.; Sinha, S. B.; Shopov, D. Y.; Mercado, B. Q.; Balcells, D.; Brudvig, G. W.; Crabtree, R. H. <i>Angew. Chem., Int. Ed.</i> <b>2017</b> , <i>56</i> , 13047. [IrC <sub>32</sub> H <sub>32</sub> N <sub>4</sub> O <sub>4</sub> ]IO <sub>4</sub> ·CCl <sub>4</sub>                          |
| 83376    | 1.762 Å | de Waal, D.; Range, K. <i>J. Naturforschung, Teil B</i> <b>1996</b> , <i>51</i> , 444-446. KIO <sub>4</sub>                                                                                                                                                                                                   |
| MOHFAR   | 1.762 Å | Sharma, R. P.; Singh, A.; Brandao, P.; Felix, V.; Venugopalan, P. <i>J. Mol. Struct.</i> <b>2008</b> , <i>888</i> , 291. [Co(N <sub>2</sub> C <sub>12</sub> H <sub>8</sub> ) <sub>3</sub> ](IO <sub>4</sub> ) <sub>3</sub> ·2H <sub>2</sub> O                                                                 |
| OZEFOP   | 1.762 Å | Gholizadeh, M.; Hojati, S. F.; Pourayoubi, M.; Maleki, B.; Kia, M.; Notash, B. <i>X-ray. Str. Anal. Online</i> <b>2011</b> , <i>27</i> , 47. (C <sub>12</sub> H <sub>14</sub> N <sub>2</sub> )(IO <sub>4</sub> ) <sub>2</sub>                                                                                 |



|          |         |                                                                                                                                                                                                                                                                                                                                                                  |
|----------|---------|------------------------------------------------------------------------------------------------------------------------------------------------------------------------------------------------------------------------------------------------------------------------------------------------------------------------------------------------------------------|
| IHEHAG   | 1.763 Å | Salchner, R.; Laus, G.; Haslinger, S.; Kahlenberg, V.; Wurst, K.; Braun, D. E.; Vergeiner, S.; Kopacka, H.; Schottenberger, H.; Puckowski, A.; Markiewicz, M.; Stolte, S.; Nerdinger, S. <i>Heterocycles</i> <b>2015</b> , <i>90</i> , 1018. (C <sub>7</sub> H <sub>16</sub> NO <sub>2</sub> )IO <sub>4</sub>                                                    |
| YIVYUB   | 1.764 Å | Yu, Z.-H.; Liu, D.-X.; Ling, Y.-Y.; Chen, X.-X.; Shang, Y.; Chen, S.-L.; Ye, Z.-M.; Zhang, W.-X.; Chen, X.-M. <i>Sci. China Mater.</i> <b>2023</b> , <i>66</i> , 1641. Rb(C <sub>6</sub> H <sub>14</sub> N <sub>2</sub> )(IO <sub>4</sub> ) <sub>3</sub>                                                                                                         |
| 89510    | 1.765 Å | Hoppe, R.; Fischer, D.; Schneider, J. <i>Z. Anorg. Allgem. Chem.</i> <b>1999</b> , <i>625</i> , 1135-1142. RbIO <sub>4</sub>                                                                                                                                                                                                                                     |
| ECAFEB   | 1.765 Å | Kaabel, A.; Adamson, J.; Topic, F.; Kiesila, A.; Kalenius, E.; Oeren, M.; Reimund, M.; Prigorchenko, E.; Lookene, A.; Reich, H. J.; Rissanen, K.; Aav, R. <i>Chem. Sci.</i> <b>2017</b> , <i>8</i> , 2184. (P(C <sub>4</sub> H <sub>9</sub> ) <sub>4</sub> )IO <sub>4</sub> ·C <sub>64</sub> H <sub>96</sub> N <sub>16</sub> O <sub>8</sub> ·2CH <sub>3</sub> OH |
| ROSDOV   | 1.765 Å | Vijayakanth, T.; Ram, F.; Praveenkumar, B.; Shanmuganathan, K.; Boomishankar, R. <i>Chem. Mater.</i> <b>2019</b> , <i>31</i> , 5964. (P(C <sub>6</sub> H <sub>5</sub> ) <sub>2</sub> (NHC <sub>3</sub> H <sub>7</sub> ) <sub>2</sub> )IO <sub>4</sub>                                                                                                            |
| ROSFIR   | 1.765 Å | Vijayakanth, T.; Ram, F.; Praveenkumar, B.; Shanmuganathan, K.; Boomishankar, R. <i>Chem. Mater.</i> <b>2019</b> , <i>31</i> , 5964. (P(NHC <sub>3</sub> H <sub>7</sub> ) <sub>4</sub> )IO <sub>4</sub>                                                                                                                                                          |
| TEJBIX01 | 1.765 Å | Yu, Z.-H.; Liu, D.-X.; Ling, Y.-Y.; Chen, X.-X.; Shang, Y.; Chen, S.-L.; Ye, Z.-M.; Zhang, W.-X.; Chen, X.-M. <i>Sci. China Mater.</i> <b>2023</b> , <i>66</i> , 1641. NH <sub>4</sub> (C <sub>6</sub> H <sub>14</sub> N <sub>2</sub> )(IO <sub>4</sub> ) <sub>3</sub>                                                                                           |
| 83365    | 1.766 Å | de Waal, D.; Range, K. J. <i>Z. Naturforschung, Teil B</i> <b>1996</b> , <i>51</i> , 1365-1367. RbIO <sub>4</sub>                                                                                                                                                                                                                                                |
| YOFBAA   | 1.767 Å | Feng, Y.; Zhang, J.; Cao, W.; Zhang, J.; Shreeve, J. M. <i>Nature Commun.</i> <b>2023</b> , <i>14</i> , 7765. NH <sub>4</sub> (C <sub>6</sub> H <sub>14</sub> N <sub>2</sub> ) <sub>2</sub> [Na(OIO <sub>3</sub> ) <sub>6</sub> ]                                                                                                                                |
| WEMSUD   | 1.767 Å | Sharma, R. P.; Sharma, R.; Bala, R.; Burrows, A. D.; Mahon, M. F.; Cassar, K. <i>J. Mol. Struct.</i> <b>2006</b> , <i>794</i> , 173. [Co(H <sub>2</sub> N(CH <sub>2</sub> ) <sub>2</sub> NH <sub>2</sub> ) <sub>2</sub> Cl <sub>2</sub> ]IO <sub>4</sub>                                                                                                         |
| JOJYOY   | 1.767 Å | Zhang, Y.; Ye, H.-Y.; Cai, H.-L.; Fu, D.-W.; Ye, Q.; Zhang, W.; Zhou, Q.; Wang, J.; Yuan, G.-L.; Xiong, R.-G. <i>Adv. Mater.</i> <b>2014</b> , <i>26</i> , 4515. (C <sub>3</sub> D <sub>5</sub> N <sub>2</sub> )IO <sub>4</sub>                                                                                                                                  |
| IVOMAI   | 1.768 Å | Sharma, R. P.; Singh, A.; Venugopalan, P.; Harrison, W. T. A. <i>J. Mol. Struct.</i> <b>2011</b> , <i>996</i> , 82. [Co(C <sub>12</sub> H <sub>8</sub> N <sub>2</sub> ) <sub>2</sub> CO <sub>3</sub> ]IO <sub>4</sub>                                                                                                                                            |
| JOJZAL   | 1.768 Å | Zhang, Y.; Ye, H.-Y.; Cai, H.-L.; Fu, D.-W.; Ye, Q.; Zhang, W.; Zhou, Q.; Wang, J.; Yuan, G.-L.; Xiong, R.-G. <i>Adv. Mater.</i> <b>2014</b> , <i>26</i> , 4515. (C <sub>3</sub> H <sub>5</sub> N <sub>2</sub> )IO <sub>4</sub>                                                                                                                                  |
| 14287    | 1.769 Å | Kalman, A.; Cruickshank, D. W. J. <i>Acta Crystallogr., Sect. B</i> <b>1970</b> , <i>26</i> , 1782-1785. NaIO <sub>4</sub>                                                                                                                                                                                                                                       |
| TEJBET   | 1.769 Å | Chen, S. CCDC deposition number 2169907, <b>2022</b> . K(C <sub>6</sub> H <sub>14</sub> N <sub>2</sub> )(IO <sub>4</sub> ) <sub>3</sub>                                                                                                                                                                                                                          |
| ROSFAB   | 1.770 Å | Vijayakanth, T.; Ram, F.; Praveenkumar, B.; Shanmuganathan, K.; Boomishankar, R. <i>Chem. Mater.</i> <b>2019</b> , <i>31</i> , 5964. (P(C <sub>6</sub> H <sub>5</sub> )(NHC <sub>3</sub> H <sub>7</sub> ) <sub>3</sub> )IO <sub>4</sub>                                                                                                                          |
| HOHMOG05 | 1.772 Å | Maluszynska, H.; Czarnecki, P.; Lewicki, S.; Wasicki, J.; Gdaniec, M. <i>J. Phys.: Condens. Matter</i> <b>2003</b> , <i>15</i> , 5663. (C <sub>5</sub> H <sub>6</sub> N)IO <sub>4</sub>                                                                                                                                                                          |

|             |                              |                                                                                                                                                                                                                                                              |
|-------------|------------------------------|--------------------------------------------------------------------------------------------------------------------------------------------------------------------------------------------------------------------------------------------------------------|
| LANNEU      | 1.772 Å                      | Sharma, R. P.; Sharma, R.; Bala, R.; Bond, A. D. <i>Acta Crystallogr., Sect. E</i> <b>2005</b> , <i>61</i> , m997.<br>[Co(H <sub>2</sub> N(CH <sub>2</sub> ) <sub>2</sub> NH <sub>2</sub> ) <sub>2</sub> (NO <sub>2</sub> ) <sub>2</sub> ][IO <sub>4</sub> ] |
| 280083      | 1.773 Å                      | Levason, W.; Webster, M. <i>Acta Crystallogr., Sect. C</i> <b>1999</b> , <i>55</i> , 1-1. NH <sub>4</sub> IO <sub>4</sub>                                                                                                                                    |
| TEJBIX      | 1.774 Å                      | Chen, S. CCDC deposition number 2169908, <b>2022</b> . NH <sub>4</sub> (C <sub>6</sub> H <sub>14</sub> N <sub>2</sub> )(IO <sub>4</sub> ) <sub>3</sub>                                                                                                       |
| <b>Mean</b> | <b>1.757 Å/52 structures</b> |                                                                                                                                                                                                                                                              |

## Sulfite ion, SO<sub>3</sub><sup>2-</sup>

| ICSD/CSD code | d(S-O)                       | Reference                                                                                                                                                                                                                                                                                                    |
|---------------|------------------------------|--------------------------------------------------------------------------------------------------------------------------------------------------------------------------------------------------------------------------------------------------------------------------------------------------------------|
| HOXGUX        | 1.495 Å                      | Costelcean, R.; Remy, P. <i>Cryst. Growth Des.</i> <b>2009</b> , <i>9</i> , 1985. [Li <sub>2</sub> C <sub>48</sub> H <sub>64</sub> N <sub>20</sub> O <sub>8</sub> ]SO <sub>3</sub>                                                                                                                           |
| HIVVUF        | 1.499 Å                      | Khoma, R. E.; Gelmboldt, V. O.; Baumer, V. N.; Shishkin, O. V.; Koroeva, L. V. <i>Russ. J. Inorg. Chem.</i> <b>2013</b> , <i>58</i> , 950. (CH <sub>7</sub> N <sub>4</sub> ) <sub>2</sub> SO <sub>3</sub> ·H <sub>2</sub> O                                                                                  |
| 4432          | 1.505 Å                      | Larsson, L. O.; Kierkegaard, P. <i>Acta Chem. Scand.</i> <b>1969</b> , <i>23</i> , 2253. Na <sub>2</sub> SO <sub>3</sub>                                                                                                                                                                                     |
| 1626          | 1.508 Å                      | Oddon, Y.; Pepe, G.; Tranquard, A. <i>J. Chem. Res. S</i> <b>1977</b> , 138. NaTl <sub>3</sub> (SO <sub>3</sub> ) <sub>2</sub>                                                                                                                                                                               |
| 60762         | 1.515 Å                      | Andersen, L.; Strömberg, D. <i>Acta Chem. Scand., Ser. A</i> <b>1986</b> , <i>40</i> , 479. K <sub>2</sub> SO <sub>3</sub>                                                                                                                                                                                   |
| NEDHOW1       | 1.522 Å                      | Khoma, R. E.; Gelmboldt, V. O.; Ennan, A. A.; Baumer, V. N.; Puzan, A. N.; Koksharova, T. V.; Mazepa, A. V. <i>Russ. J. Inorg. Chem.</i> <b>2017</b> , <i>62</i> , 736. (C <sub>4</sub> H <sub>12</sub> N <sub>4</sub> )SO <sub>3</sub> ·H <sub>2</sub> O                                                    |
| TARBUL        | 1.522 Å                      | Murphy, L. J.; McPherson, A. M.; Robertson, K. N.; Clyburne, J. A. C. <i>Chem. Commun.</i> <b>2012</b> , <i>48</i> , 1127. (H <sub>3</sub> N(CH <sub>2</sub> ) <sub>2</sub> NH(CH <sub>2</sub> ) <sub>2</sub> NH <sub>3</sub> )SO <sub>3</sub> ·H <sub>2</sub> O                                             |
| 23824         | 1.524 Å                      | Battelle, L. F.; Trueblood, K. N. <i>Acta Crystallogr.</i> <b>1965</b> , <i>19</i> , 531. (NH <sub>4</sub> ) <sub>2</sub> SO <sub>3</sub> ·H <sub>2</sub> O                                                                                                                                                  |
| YOPVEG        | 1.524 Å                      | Khoma, R. E.; Gelmboldt, V. O.; Shishkin, O. V.; Baumer, V. N.; Puzan, A. N.; Ennan, A. A.; Rakipov, I. M. <i>Russ. J. Inorg. Chem.</i> <b>2014</b> , <i>59</i> , 716. (H <sub>3</sub> N(CH <sub>2</sub> ) <sub>2</sub> NH <sub>2</sub> (CH <sub>2</sub> ) <sub>2</sub> OH)SO <sub>3</sub> ·H <sub>2</sub> O |
| 131990        | 1.526 Å                      | Weil, M.; Mereiter, K. <i>Acta Crystallogr., Sect. C</i> <b>2020</b> , <i>76</i> , 427. Na <sub>2</sub> SO <sub>3</sub> ·7H <sub>2</sub> O                                                                                                                                                                   |
| 200780        | 1.526 Å                      | Archer, C.; Durand, J.; Cot, L.; Galigne, J. L. <i>Can. J. Chem.</i> <b>1979</b> , <i>57</i> , 899. LiCsSO <sub>3</sub> ·2H <sub>2</sub> O                                                                                                                                                                   |
| 48112         | 1.528 Å                      | Anderson, L.; Lindqvist, O. <i>Acta Crystallogr., Sect. B</i> <b>1984</b> , <i>40</i> , 584. [Mg(H <sub>2</sub> O) <sub>6</sub> ]SO <sub>3</sub>                                                                                                                                                             |
| NEDHIQ        | 1.528 Å                      | Zhao, W.; Zhao, Q.; Zhang, Z.; Liu, J.; Chen, R.; Chen, Y.; Chen, J. <i>Fuel</i> <b>2017</b> , <i>209</i> , 69. (H <sub>3</sub> N(CH <sub>2</sub> ) <sub>2</sub> NH <sub>3</sub> ) <sub>2</sub> SO <sub>3</sub>                                                                                              |
| 26149         | 1.532 Å                      | Baggio, S.; Becka, L. N. <i>Acta Crystallogr., Sect. B</i> <b>1969</b> , <i>25</i> , 1150. [Ni(H <sub>2</sub> O) <sub>6</sub> ]SO <sub>3</sub>                                                                                                                                                               |
| NEDHOW        | 1.532 Å                      | Zhao, W.; Zhao, Q.; Zhang, Z.; Liu, J.; Chen, R.; Chen, Y.; Chen, J. <i>Fuel</i> <b>2017</b> , <i>209</i> , 69. (C <sub>4</sub> H <sub>12</sub> N <sub>4</sub> )SO <sub>3</sub> ·H <sub>2</sub> O                                                                                                            |
| 240683        | 1.533 Å                      | Nguyen, D.-T.; Bu, X. <i>Inorg. Chem.</i> <b>2006</b> , <i>45</i> , 10410. Na(Zn(OH)) <sub>3</sub> (SO <sub>3</sub> ) <sub>2</sub>                                                                                                                                                                           |
| 62636         | 1.533 Å                      | Bats, J. W.; Fuess, H.; Elerman, Y. <i>Acta Crystallogr., Sect. B</i> <b>1986</b> , <i>42</i> , 552. [Mg(H <sub>2</sub> O) <sub>6</sub> ]SO <sub>3</sub>                                                                                                                                                     |
| 2524          | 1.536 Å                      | Flack, H. D. <i>Acta Crystallogr., Sect. B</i> <b>1973</b> , <i>29</i> , 656. [Mg(H <sub>2</sub> O) <sub>6</sub> ]SO <sub>3</sub>                                                                                                                                                                            |
| 62637         | 1.536 Å                      | Bats, J. W.; Fuess, H.; Elerman, Y. <i>Acta Crystallogr., Sect. B</i> <b>1986</b> , <i>42</i> , 552. [Mg(H <sub>2</sub> O) <sub>6</sub> ]SO <sub>3</sub>                                                                                                                                                     |
| 62638         | 1.536 Å                      | Bats, J. W.; Fuess, H.; Elerman, Y. <i>Acta Crystallogr., Sect. B</i> <b>1986</b> , <i>42</i> , 552. [Mg(H <sub>2</sub> O) <sub>6</sub> ]SO <sub>3</sub>                                                                                                                                                     |
| TARBOF        | 1.540 Å                      | Murphy, L. J.; McPherson, A. M.; Robertson, K. N.; Clyburne, J. A. C. <i>Chem. Commun.</i> <b>2012</b> , <i>48</i> , 1127. (H <sub>3</sub> N(CH <sub>2</sub> ) <sub>2</sub> NH <sub>2</sub> (CH <sub>2</sub> ) <sub>2</sub> NH <sub>3</sub> )SO <sub>3</sub> Cl                                              |
| 2166          | 1.555 Å                      | Oddon, Y.; Pepe, G.; Vignalou, J. R.; Tranquard, A. <i>J. Chem. Soc., Syn.</i> <b>1978</b> , 250. Tl <sub>2</sub> SO <sub>3</sub>                                                                                                                                                                            |
| <b>Mean</b>   | <b>1.524 Å/22 structures</b> |                                                                                                                                                                                                                                                                                                              |

## Sulfate ion, SO<sub>4</sub><sup>2-</sup>

| ICSD/CSD code | d(S-O)  | Reference                                                                                                                                                                                                                    |
|---------------|---------|------------------------------------------------------------------------------------------------------------------------------------------------------------------------------------------------------------------------------|
| 145512        | 1.450 Å | Kyono, A.; Ikeda, R.; Takagi, S.; Nishiyasu, W. <i>J. Miner. Petrolog. Sci.</i> <b>2022</b> , <i>117</i> , 220811. CaSO <sub>4</sub> ·0.75H <sub>2</sub> O                                                                   |
| 20851         | 1.456 Å | Sandomirskii, P. A.; Meshalkin, S. S.; Rozhdestvenskaya, I. V. <i>Kristallografiya</i> <b>1983</b> , <i>28</i> , 67. KLiSO <sub>4</sub>                                                                                      |
| 63181         | 1.458 Å | Asahi, T.; Hasebe, K. <i>J. Phys. Soc. Jpn.</i> <b>1988</b> , <i>57</i> , 4184. LiCsSO <sub>4</sub>                                                                                                                          |
| 30747         | 1.459 Å | Armstrong, R. S.; Beattie, J. K.; Best, S. P.; Skelton, B. W.; White, A. H. <i>J. Chem. Soc., Dalton Trans.</i> <b>1983</b> , 1973. Cs[Rh(H <sub>2</sub> O) <sub>6</sub> ](SO <sub>4</sub> ) <sub>2</sub> ·6H <sub>2</sub> O |
| 36470         | 1.459 Å | Schulz, H.; Zucker, U.; Frech, R. E. <i>Acta Crystallogr., Sect. B</i> <b>1985</b> , <i>41</i> , 21. KLiSO <sub>4</sub>                                                                                                      |
| 136218        | 1.460 Å | Yan, Y.; Chen, Y.; Jiang, B.; Jing, Q.; Zhang, J. <i>New. J. Chem.</i> <b>2021</b> , <i>45</i> , 19883. Li <sub>5</sub> Cs(SO <sub>4</sub> ) <sub>3</sub>                                                                    |
| 48136         | 1.461 Å | Bhakay-Tamhane, S. N.; Sequeira, A.; Chidambaram, R. <i>Acta Crystallogr., Sect. C</i> <b>1984</b> , <i>40</i> , 1648. KLiSO <sub>4</sub>                                                                                    |
| 166170        | 1.461 Å | Kurihama, T.; Suzuki, Y.; Teng Y.-J.; Shimizu, F.; Yamaguchi, T. <i>Ferroelectrics</i> <b>2009</b> , <i>381</i> , 201. (NH <sub>4</sub> ) <sub>3</sub> Li(SO <sub>4</sub> ) <sub>2</sub>                                     |
| 201212        | 1.461 Å | Beattie, J. K.; Best, S. P.; Skelton, B. W.; White, A. H. <i>J. Chem. Soc., Dalton Trans.</i> <b>1981</b> , 2105. Cs[Mn(H <sub>2</sub> O) <sub>6</sub> ](SO <sub>4</sub> ) <sub>2</sub> ·6H <sub>2</sub> O                   |
| 201214        | 1.461 Å | Beattie, J. K.; Best, S. P.; Skelton, B. W.; White, A. H. <i>J. Chem. Soc., Dalton Trans.</i> <b>1981</b> , 2105. Cs[Co(H <sub>2</sub> O) <sub>6</sub> ](SO <sub>4</sub> ) <sub>2</sub> ·6H <sub>2</sub> O                   |
| 30748         | 1.462 Å | Armstrong, R. S.; Beattie, J. K.; Best, S. P.; Skelton, B. W.; White, A. H. <i>J. Chem. Soc., Dalton Trans.</i> <b>1983</b> , 1973. Cs[Ir(H <sub>2</sub> O) <sub>6</sub> ](SO <sub>4</sub> ) <sub>2</sub> ·6H <sub>2</sub> O |
| 33251         | 1.462 Å | Gu, X.-Y. <i>Wuli Xuebao</i> <b>1983</b> , <i>32</i> , 1196. KLiSO <sub>4</sub>                                                                                                                                              |
| 26196         | 1.463 Å | Dollase, W. A. <i>Acta Crystallogr., Sect. B</i> <b>1969</b> , <i>25</i> , 2298. LiNH <sub>4</sub> SO <sub>4</sub>                                                                                                           |
| 34313         | 1.464 Å | Ikuji, K.; Teng, Y. J.; Kurihama, T. <i>Ferroelectrics</i> <b>2017</b> , <i>513</i> , 78. (NH <sub>4</sub> ) <sub>3</sub> Na(SO <sub>4</sub> ) <sub>2</sub>                                                                  |
| 145528        | 1.464 Å | Kyono, A.; Ikeda, R.; Takagi, S.; Nishiyasu, W. <i>J. Miner. Petrolog. Sci.</i> <b>2022</b> , <i>117</i> , 220811. CaSO <sub>4</sub>                                                                                         |
| 26337         | 1.465 Å | Tanisaki, S.; Mashiyama, H.; Hasebe, K.; Shiroishi, Y.; Sawada, S. <i>Acta Crystallogr., Sect. B</i> <b>1980</b> , <i>36</i> , 3084. LiRbSO <sub>4</sub>                                                                     |
| 29930         | 1.465 Å | Lee, S.; Xu, H.; Xu, H.; Neufeind, J. <i>Minerals</i> <b>2021</b> , <i>11</i> , 272. CaSO <sub>4</sub> ·2H <sub>2</sub> O                                                                                                    |
| 73989         | 1.465 Å | Mashiyama, H.; Kasano, H. <i>J. Phys. Soc. Jpn.</i> <b>1993</b> , <i>62</i> , 155. LiNH <sub>4</sub> SO <sub>4</sub>                                                                                                         |
| 84118         | 1.465 Å | Gonzalez-Silgo, C.; Solans, X.; Ruiz Perez, C.; Martinez-Sarrion, M. L.; Mestres, L.; Bocanegra, E. H. <i>J. Phys.; Cond. Matter</i> <b>1997</b> , <i>9</i> , 2657. (NH <sub>4</sub> ) <sub>2</sub> SO <sub>4</sub>          |
| 266702        | 1.465 Å | Malec, L. M.; Gryl, M.; Stadnicka, K. M. <i>Inorg. Chem.</i> <b>2018</b> , <i>57</i> , 4340. (NH <sub>4</sub> ) <sub>2</sub> SO <sub>4</sub>                                                                                 |
| 34257         | 1.465 Å | Schlemper, E. O.; Hamilton, W. C. <i>J. Chem. Phys.</i> <b>1966</b> , <i>44</i> , 4498. (NH <sub>4</sub> ) <sub>2</sub> SO <sub>4</sub>                                                                                      |

|        |         |                                                                                                                                                                                                                    |
|--------|---------|--------------------------------------------------------------------------------------------------------------------------------------------------------------------------------------------------------------------|
| 62981  | 1.466 Å | Zhang, P.-L.; Yan, Q. W.; Boucherle, J. X. <i>Acta Crystallogr., Sect. C</i> <b>1988</b> , <i>44</i> , 592. $\text{KLiSO}_4$                                                                                       |
| 200524 | 1.466 Å | Kruglik, A. I.; Misjul', S. V.; Simonov, M. A. <i>Kristallografiya</i> <b>1979</b> , <i>24</i> , 582. $\text{LiRbSO}_4$                                                                                            |
| 81085  | 1.467 Å | Niwata, A.; Itoh, K. <i>J. Phys. Soc. Jpn.</i> <b>1995</b> , <i>64</i> , 4184. $\text{LiCsSO}_4$                                                                                                                   |
| 136245 | 1.468 Å | Comodi, P.; Fastelli, M.; Criniti, G.; Glazyrin, K.; Zucchini, A. <i>Crystals</i> <b>2021</b> , <i>11</i> , 976. $(\text{NH}_4)_2\text{SO}_4$                                                                      |
| 200905 | 1.468 Å | Hasebe, K. <i>J. Phys. Soc. Jpn.</i> <b>1981</b> , <i>50</i> , 1266. $(\text{NH}_4)_2\text{SO}_4$                                                                                                                  |
| 2827   | 1.469 Å | McGinnety, J. A. <i>Acta Crystallogr., Sect. B</i> <b>1972</b> , <i>28</i> , 3084. $\text{K}_2\text{SO}_4$                                                                                                         |
| 113690 | 1.469 Å | Yang, Y.-C.; Liu, X.; Lu, J.; Wu, L.-M.; Chen, L. <i>Angew. Chem., Int. Ed.</i> <b>2021</b> , <i>60</i> , 21216; <i>JACS Au</i> <b>2022</b> , <i>2</i> , 2059. $[\text{Ag}(\text{NH}_3)_2]_2\text{SO}_4$           |
| 200624 | 1.469 Å | Kruglik, A. I.; Simonov, M. A.; Zhelezin, E. P.; Belov, N. V. <i>Dokl. Akad. Nauk SSSR</i> <b>1979</b> , <i>247</i> , 1384. $\text{LiCsSO}_4$                                                                      |
| 201211 | 1.469 Å | Beattie, J. K.; Best, S. P.; Skelton, B. W.; White, A. H. <i>J. Chem. Soc., Dalton Trans.</i> <b>1981</b> , 2105. $\text{Cs}[\text{Cr}(\text{H}_2\text{O})_6](\text{SO}_4)_2 \cdot 6\text{H}_2\text{O}$            |
| 280551 | 1.469 Å | Nyburg, S. C.; Steed, J.; Aleksovska, S.; Petrusevski, V. M. <i>Acta Crystallogr., Sect. B</i> <b>2000</b> , <i>56</i> , 204. $\text{K}[\text{Cr}(\text{H}_2\text{O})_6](\text{SO}_4)_2 \cdot 6\text{H}_2\text{O}$ |
| 419316 | 1.469 Å | Lu Y.; Feng Y. <i>Chin. J. Chem.</i> <b>2009</b> , <i>25</i> , 447. $\text{Na}[\text{Co}(\text{H}_2\text{O})_6](\text{SO}_4)_2$                                                                                    |
| 429064 | 1.469 Å | Avdontceva, M. S.; Zolotarev, A. A.; Krivovichev, S. V. <i>J. Solid State Chem.</i> <b>2015</b> , <i>231</i> , 42. $\text{Na}_3\text{SO}_4\text{F}$                                                                |
| 4309   | 1.470 Å | Hodgson, P. G.; Whitnall, J.; Kennard, C. H. L.; Moore, F. H. <i>Cryst. Struct. Commun.</i> <b>1975</b> , <i>4</i> , 713. $\text{K}_2[\text{Zn}(\text{H}_2\text{O})_6](\text{SO}_4)_2$                             |
| 14364  | 1.470 Å | Morosin, B.; Smith, D. L. <i>Acta Crystallogr.</i> <b>1967</b> , <i>22</i> , 906. $\text{LiNaSO}_4$                                                                                                                |
| 59891  | 1.470 Å | Rempfer, N.; Lerner, H. W.; Bolte, M. <i>Acta Crystallogr., Sect. E</i> <b>2004</b> , <i>60</i> , i80. $\text{NH}_4[\text{Cr}(\text{H}_2\text{O})_6](\text{SO}_4)_2 \cdot 6\text{H}_2\text{O}$                     |
| 95407  | 1.470 Å | Mata, J.; Solans, X.; Calvet, M. T.; Molera, J.; Font-Bardia, M. <i>J. Phys.: Cond. Matter</i> <b>2002</b> , <i>14</i> , 5211. $\text{LiNaSO}_4$                                                                   |
| 19808  | 1.471 Å | Eckhardt, T.; Wagner, C.; Imming, P.; Seidel, R. W. <i>IUCr Data</i> <b>2020</b> , <i>5</i> , 201275. $\text{NaNH}_4\text{SO}_4 \cdot 2\text{H}_2\text{O}$                                                         |
| 77896  | 1.471 Å | Arzt, S.; Glazer, A. M. <i>Acta Crystallogr., Sect. B</i> <b>1994</b> , <i>50</i> , 425. $\text{NH}_4\text{NaSO}_4 \cdot 2\text{H}_2\text{O}$                                                                      |
| 133603 | 1.471 Å | Svensson, F. G. <i>Acta Crystallogr., Sect. E</i> <b>2021</b> , <i>77</i> , 58. $[\text{Al}(\text{H}_2\text{O})_6]\text{SO}_4\text{Cl} \cdot \text{H}_2\text{O}$                                                   |
| 145510 | 1.471 Å | Kyono, A.; Ikeda, R.; Takagi, S.; Nishiyasu, W. <i>J. Miner. Petrolog. Sci.</i> <b>2022</b> , <i>117</i> , 220811. $\text{CaSO}_4 \cdot 0.83\text{H}_2\text{O}$                                                    |
| 194492 | 1.471 Å | Komornicka, D.; Wolcyrz, M.; Pietraszko, A. <i>Cryst. Growth Des.</i> <b>2014</b> , <i>14</i> , 5784. $\text{LiNH}_4\text{SO}_4$                                                                                   |
| 245146 | 1.471 Å | Chabchoub, N.; Darriet, J.; Khemakhem, H. <i>J. Solid State Chem.</i> <b>2006</b> , <i>179</i> , 2164. $\text{CsKSO}_4 \cdot \text{Te}(\text{OH})_6$                                                               |
| 254107 | 1.471 Å | Karppinen, M. <i>Acta Crystallogr., Sect. B</i> <b>2015</b> , <i>71</i> , 334. $\text{LiNaSO}_4$                                                                                                                   |
| 409740 | 1.471 Å | Euler, H.; Barbier, B.; Meents, A.; Kirfel, A. <i>Z. Kristallogr. – New Struct.</i> <b>2009</b> , <i>224</i> , 171. $\text{K}_2[\text{Fe}(\text{H}_2\text{O})_6]$                                                  |

|        |         |                                                                                                                                                                                                                                                            |
|--------|---------|------------------------------------------------------------------------------------------------------------------------------------------------------------------------------------------------------------------------------------------------------------|
| 9373   | 1.472 Å | Zubkova, N. V.; Pekov, I. V.; Ksenofontov, D. A.; Yapaskurt, V. O.; Pushcharovsky, D. Y.; Sidorov, E. G. <i>Dokl. Earth Sci.</i> <b>2018</b> , 479, 339. K <sub>2</sub> SO <sub>4</sub>                                                                    |
| 9519   | 1.472 Å | Pabst, A.; Sharp, W. N. <i>Am. Miner.</i> <b>1973</b> , 58, 116. Na <sub>3</sub> SO <sub>4</sub> F                                                                                                                                                         |
| 23187  | 1.472 Å | Brown, G. M.; Chidambaram, R. <i>Acta Crystallogr., Sect. B</i> <b>1969</b> , 25, 676. [NH <sub>4</sub> ] <sub>2</sub> [Cu(H <sub>2</sub> O) <sub>6</sub> ](SO <sub>4</sub> ) <sub>2</sub>                                                                 |
| 31145  | 1.472 Å | Fanfani, L.; Giuseppetti, G.; Tadini, C.; Zanazzi, P. F. <i>Miner. Magazine</i> <b>1980</b> , 43, 753. Na <sub>3</sub> SO <sub>4</sub> F                                                                                                                   |
| 51640  | 1.472 Å | Kockelmann, W.; Schaefer, W.; Kirfel, A.; Klapper, H.; Euler, H. <i>Mater. Sci. Forum</i> <b>2001</b> , 378, 274. K <sub>2</sub> [Co(D <sub>2</sub> O) <sub>6</sub> ](SO <sub>4</sub> ) <sub>2</sub>                                                       |
| 54472  | 1.472 Å | Dammak, M.; Khemakhem, H.; Mhiri, T.; Kolsi, A.W.; Daoud, A. <i>J. Alloys Compd.</i> <b>1998</b> , 280, 107. Rb <sub>2</sub> SO <sub>4</sub> ·Te(OH) <sub>6</sub>                                                                                          |
| 59856  | 1.472 Å | Li, X.-H.; Li, Z.-G. <i>Acta Crystallogr., Sect. E</i> <b>2004</b> , 60, i114. [NH <sub>4</sub> ] <sub>2</sub> [Co(H <sub>2</sub> O) <sub>6</sub> ](SO <sub>4</sub> ) <sub>2</sub>                                                                         |
| 66115  | 1.472 Å | Shiozaki, Y.; Onodera, A.; Yoshida, M.; Takahashi, I. <i>Ferroelectrics</i> <b>1989</b> , 96, 73. Cs <sub>2</sub> SO <sub>4</sub>                                                                                                                          |
| 81506  | 1.472 Å | Rasmussen, S. E.; Jørgensen, J. E.; Lundtoft, B. <i>J. Appl. Crystallogr.</i> <b>1996</b> , 29, 42. Na <sub>2</sub> SO <sub>4</sub>                                                                                                                        |
| 136757 | 1.472 Å | Ikeda, R.; Kyono, A. <i>J. Solid State Chem.</i> <b>2021</b> , 304, 122574. Na <sub>2</sub> SO <sub>4</sub> ·10H <sub>2</sub> O                                                                                                                            |
| 145524 | 1.472 Å | Kyono, A.; Ikeda, R.; Takagi, S.; Nishiyasu, W. <i>J. Miner. Petrolog. Sci.</i> <b>2022</b> , 117, 220811. CaSO <sub>4</sub> ·0.2H <sub>2</sub> O                                                                                                          |
| 409738 | 1.472 Å | Euler, H.; Barbier, B.; Meents, A.; Kirfel, A. <i>Z. Kristallogr. – New Struct.</i> <b>2003</b> , 218, 409. Cs <sub>2</sub> [Mn(H <sub>2</sub> O) <sub>6</sub> ]                                                                                           |
| POKROA | 1.472 Å | Jing, L.; Deplazes, E.; Clegg, J. K. Wu, X. <i>Nature Chem.</i> <b>2024</b> , 16, 335. ((n-C <sub>4</sub> H <sub>9</sub> ) <sub>4</sub> N) <sub>2</sub> SO <sub>4</sub> ·C <sub>36</sub> H <sub>66</sub> N <sub>14</sub> O <sub>6</sub> ·2H <sub>2</sub> O |
| 4308   | 1.473 Å | Hodgson, P. G.; Whitnall, J.; Kennard, C. H. L.; Moore, F. H. <i>Cryst. Struct. Commun.</i> <b>1975</b> , 4, 713. K <sub>2</sub> [Ni(H <sub>2</sub> O) <sub>6</sub> ](SO <sub>4</sub> ) <sub>2</sub>                                                       |
| 25713  | 1.473 Å | Margulis, T. N.; Templeton, D. H. <i>Z. Kristallogr.</i> <b>1972</b> , 117, 344. (NH <sub>4</sub> ) <sub>2</sub> [Mg(H <sub>2</sub> O) <sub>6</sub> ](SO <sub>4</sub> ) <sub>2</sub>                                                                       |
| 50582  | 1.473 Å | Kirfel, A.; Klapper, H.; Schaefer, W.; Schwabenlaender, F. <i>Z. Kristallogr.</i> <b>1998</b> , 213, 456. K <sub>2</sub> [Co(H <sub>2</sub> O) <sub>6</sub> ](SO <sub>4</sub> ) <sub>2</sub>                                                               |
| 62991  | 1.473 Å | Maslen, E. N.; Watson, K. J.; Moore, F. H. <i>Acta Crystallogr., Sect. B</i> <b>1988</b> , 44, 102. (NH <sub>4</sub> ) <sub>2</sub> [Mg(H <sub>2</sub> O) <sub>6</sub> ](SO <sub>4</sub> ) <sub>2</sub>                                                    |
| 63024  | 1.473 Å | Maslen, E. N.; Watson, K. J.; Moore, F. H. <i>Acta Crystallogr., Sect. B</i> <b>1988</b> , 44, 102. (NH <sub>4</sub> ) <sub>2</sub> [Mg(H <sub>2</sub> O) <sub>6</sub> ](SO <sub>4</sub> ) <sub>2</sub>                                                    |
| 78419  | 1.473 Å | Hasebe, K.; Asahi, T. <i>Ferroelectrics</i> <b>1994</b> , 159, 61. NH <sub>4</sub> LiSO <sub>4</sub>                                                                                                                                                       |
| 100458 | 1.473 Å | Mehrotra, B. N. <i>Z. Kristallogr.</i> <b>1981</b> , 155, 159. Na <sub>2</sub> SO <sub>4</sub>                                                                                                                                                             |
| 165965 | 1.473 Å | Brand, H. E. A.; Fortes, A. D.; Wood, I. G.; Knight, K. S.; Vocadlo, L. <i>Phys. Chem. Miner.</i> <b>2009</b> , 36, 29. Na <sub>2</sub> SO <sub>4</sub> ·10D <sub>2</sub> O                                                                                |
| 186839 | 1.473 Å | Kotera, T.; Yoshioka, D.; Mikuriya, M. <i>X-Ray Struct. Anal. Online</i> <b>2012</b> , 28, 45. K <sub>3</sub> Na(SO <sub>4</sub> ) <sub>2</sub>                                                                                                            |

|        |         |                                                                                                                                                                                                                        |
|--------|---------|------------------------------------------------------------------------------------------------------------------------------------------------------------------------------------------------------------------------|
| 201217 | 1.473 Å | Beattie, J. K.; Best, S. P.; Skelton, B. W.; White, A. H. <i>J. Chem. Soc., Dalton Trans.</i> <b>1981</b> , 2105. Cs[In(H <sub>2</sub> O) <sub>6</sub> ](SO <sub>4</sub> ) <sub>2</sub> ·6H <sub>2</sub> O             |
| 409739 | 1.473 Å | Euler, H.; Barbier, B.; Meents, A.; Kirfel, A. <i>Z. Kristallogr. – New Struct.</i> <b>2003</b> , 218, 409. Cs <sub>2</sub> [Fe(H <sub>2</sub> O) <sub>6</sub> ](SO <sub>4</sub> ) <sub>2</sub>                        |
| 409742 | 1.473 Å | Euler, H.; Barbier, B.; Meents, A.; Kirfel, A. <i>Z. Kristallogr. – New Struct.</i> <b>2003</b> , 218, 409. Cs <sub>2</sub> [Zn(H <sub>2</sub> O) <sub>6</sub> ](SO <sub>4</sub> ) <sub>2</sub>                        |
| 409984 | 1.473 Å | Euler, H.; Barbier, B.; Meents, A.; Kirfel, A. <i>Z. Kristallogr. – New Struct.</i> <b>2003</b> , 218, 409. Cs <sub>2</sub> [Co(H <sub>2</sub> O) <sub>6</sub> ]                                                       |
| 409985 | 1.473 Å | Euler, H.; Barbier, B.; Meents, A.; Kirfel, A. <i>Z. Kristallogr. – New Struct.</i> <b>2003</b> , 218, 409. Cs <sub>2</sub> [Zn(H <sub>2</sub> O) <sub>6</sub> ]                                                       |
| 2105   | 1.474 Å | Nord, A. G. <i>Acta Crystallogr., Sect. B</i> <b>1974</b> , 30, 1640. Rb <sub>2</sub> SO <sub>4</sub>                                                                                                                  |
| 14310  | 1.474 Å | Corazza, E.; Sabelli, C.; Giuseppetti, G. <i>Acta Crystallogr.</i> <b>1967</b> , 22, 683. NaNH <sub>4</sub> SO <sub>4</sub> ·2H <sub>2</sub> O                                                                         |
| 30505  | 1.474 Å | Levy, A. H.; Lisensky, G. C. <i>Acta Crystallogr., Sect. B</i> <b>1978</b> , 34, 3502. Na <sub>2</sub> SO <sub>4</sub> ·10H <sub>2</sub> O                                                                             |
| 66554  | 1.474 Å | Tanaka, K.; Naruse, H.; Morikawa, H.; Marumo, F. <i>Acta Crystallogr., Sect. B</i> <b>1991</b> , 47, 581. Na <sub>2</sub> SO <sub>4</sub>                                                                              |
| 63026  | 1.474 Å | Maslen, E. N.; Ridout, S. C.; Watson, K. J.; Moore, F. H. <i>Acta Crystallogr., Sect. C</i> <b>1988</b> , 44, 412. (NH <sub>4</sub> ) <sub>2</sub> [Ni(H <sub>2</sub> O) <sub>6</sub> ](SO <sub>4</sub> ) <sub>2</sub> |
| 90098  | 1.474 Å | Simmons, C. J.; Hitchman, M. A.; Stratemeier, H. <i>Inorg. Chem.</i> <b>2000</b> , 39, 6124. (NH <sub>4</sub> ) <sub>2</sub> [Zn(H <sub>2</sub> O) <sub>6</sub> ](SO <sub>4</sub> ) <sub>2</sub>                       |
| 135097 | 1.474 Å | Srinivasan, B. R.; Deshpande, M. S. <i>Optics &amp; Laser Technol.</i> <b>2021</b> , 137, 106864. [Mg(H <sub>2</sub> O) <sub>6</sub> ]SO <sub>4</sub>                                                                  |
| 136755 | 1.474 Å | Ikeda, R.; Kyono, A. <i>J. Solid State Chem.</i> <b>2021</b> , 304, 122574. Na <sub>2</sub> SO <sub>4</sub> ·10H <sub>2</sub> O                                                                                        |
| 143782 | 1.474 Å | Mutschke, A.; Bernard, G. M.; Bertmer, M.; Karttunen, A. J.; Ritter, C.; Michaelis, V. K.; Kunkel, N. <i>Angew. Chem., Int. Ed.</i> <b>2021</b> , 60, 5683. Na <sub>3</sub> SO <sub>4</sub> D                          |
| 145521 | 1.474 Å | Kyono, A.; Ikeda, R.; Takagi, S.; Nishiyasu, W. <i>J. Miner. Petrolog. Sci.</i> <b>2022</b> , 117, 220811. CaSO <sub>4</sub> ·0.535H <sub>2</sub> O                                                                    |
| 162313 | 1.474 Å | Bosi, F.; Belardi, G.; Ballirano, P. <i>Am. Miner.</i> <b>2009</b> , 94, 47. K <sub>2</sub> [Mg(H <sub>2</sub> O) <sub>6</sub> ](SO <sub>4</sub> ) <sub>2</sub>                                                        |
| 171288 | 1.474 Å | Simmons, C. J.; Stratemeier, H.; Hitchman, M. A.; Riley, M. J. <i>Inorg. Chem.</i> <b>2006</b> , 45, 1021. K <sub>2</sub> [Cu(H <sub>2</sub> O) <sub>6</sub> ](SO <sub>4</sub> ) <sub>2</sub>                          |
| 201213 | 1.474 Å | Beattie, J. K.; Best, S. P.; Skelton, B. W.; White, A. H. <i>J. Chem. Soc., Dalton Trans.</i> <b>1981</b> , 2105. Cs[Fe(H <sub>2</sub> O) <sub>6</sub> ](SO <sub>4</sub> ) <sub>2</sub> ·6H <sub>2</sub> O             |
| 203160 | 1.474 Å | Weber, H. J.; Schulz, M.; Schmitz, S.; Granzin, J.; Siegert, H. <i>J. Phys.: Cond. Matter</i> <b>1989</b> , 1, 8543. Cs <sub>2</sub> SO <sub>4</sub>                                                                   |
| 280547 | 1.474 Å | Nyburg, S. C.; Steed, J.; Aleksovskaja, S.; Petrusevski, V. M. <i>Acta Crystallogr., Sect. B</i> <b>2000</b> , 56, 204. K[Al(H <sub>2</sub> O) <sub>6</sub> ](SO <sub>4</sub> ) <sub>2</sub> ·6H <sub>2</sub> O        |
| 409737 | 1.474 Å | Euler, H.; Barbier, B.; Meents, A.; Kirfel, A. <i>Z. Kristallogr. – New Struct.</i> <b>2003</b> , 218, 409. Cs <sub>2</sub> [Mg(H <sub>2</sub> O) <sub>6</sub> ]                                                       |
| 409741 | 1.474 Å | Euler, H.; Barbier, B.; Meents, A.; Kirfel, A. <i>Z. Kristallogr. – New Struct.</i> <b>2003</b> , 218, 409. Cs <sub>2</sub> [Ni(H <sub>2</sub> O) <sub>6</sub> ]                                                       |
| 4306   | 1.475 Å | Smith, G.; Moore, F. H.; Kennard, C. H. L. <i>Cryst. Struct. Commun.</i> <b>1975</b> , 4, 407. Rb <sub>2</sub> [Cu(H <sub>2</sub> O) <sub>6</sub> ](SO <sub>4</sub> ) <sub>2</sub>                                     |



|        |         |                                                                                                                                                                                                                                                                                                      |
|--------|---------|------------------------------------------------------------------------------------------------------------------------------------------------------------------------------------------------------------------------------------------------------------------------------------------------------|
| 34258  | 1.475 Å | Schlemper, E. O.; Hamilton, W. C. <i>J. Chem. Phys.</i> <b>1966</b> , <i>44</i> , 4498. (NH <sub>4</sub> ) <sub>2</sub> SO <sub>4</sub>                                                                                                                                                              |
| 63077  | 1.475 Å | Eysel, W.; Hoefler, H. H.; Keester, K. L.; Hahn, T. <i>Acta Crystallogr., Sect. B</i> <b>1985</b> , <i>41</i> , 5. Na <sub>2</sub> SO <sub>4</sub>                                                                                                                                                   |
| 65012  | 1.475 Å | Maslen, E. N.; Ridout, S. C.; Watson, K. J.; Moore, F. H. <i>Acta Crystallogr., Sect. C</i> <b>1988</b> , <i>44</i> , 1510. (NH <sub>4</sub> ) <sub>2</sub> [Zn(H <sub>2</sub> O) <sub>6</sub> ](SO <sub>4</sub> ) <sub>2</sub>                                                                      |
| 79777  | 1.475 Å | Ojima, K.; Nishihata, Y.; Sawada, A. <i>Acta Crystallogr., Sect. B</i> <b>1995</b> , <i>51</i> , 287. K <sub>2</sub> SO <sub>4</sub>                                                                                                                                                                 |
| 135795 | 1.475 Å | Schmidt, H.; Paschke, I.; Voigt, W. <i>Acta Crystallogr., Sect. E</i> <b>2021</b> , <i>77</i> , 924. LiNa <sub>3</sub> (SO <sub>4</sub> ) <sub>2</sub> ·6H <sub>2</sub> O                                                                                                                            |
| 143783 | 1.475 Å | Mutschke, A.; Bernard, G. M.; Bertmer, M.; Karttunen, A. J.; Ritter, C.; Michaelis, V. K.; Kunkel, N. <i>Angew. Chem., Int. Ed.</i> <b>2021</b> , <i>60</i> , 5683. Na <sub>3</sub> SO <sub>4</sub> H                                                                                                |
| 162318 | 1.475 Å | Bosi, F.; Belardi, G.; Ballirano, P. <i>Am. Miner.</i> <b>2009</b> , <i>94</i> , 47. K <sub>2</sub> [Zn(H <sub>2</sub> O) <sub>6</sub> ](SO <sub>4</sub> ) <sub>2</sub>                                                                                                                              |
| 188767 | 1.475 Å | Mereiter, K. <i>Acta Crystallogr., Sect. E</i> <b>2013</b> , <i>69</i> , i63. Na[Al(H <sub>2</sub> O) <sub>6</sub> ](SO <sub>4</sub> ) <sub>2</sub>                                                                                                                                                  |
| 201215 | 1.475 Å | Beattie, J. K.; Best, S. P.; Skelton, B. W.; White, A. H. <i>J. Chem. Soc., Dalton Trans.</i> <b>1981</b> , 2105. Cs[Al(H <sub>2</sub> O) <sub>6</sub> ](SO <sub>4</sub> ) <sub>2</sub> ·6H <sub>2</sub> O                                                                                           |
| 203159 | 1.475 Å | Weber, H. J.; Schulz, M.; Schmitz, S.; Granzin, J.; Siegert, H. <i>J. Phys.: Cond. Matter</i> <b>1989</b> , <i>1</i> , 8543. Rb <sub>2</sub> SO <sub>4</sub>                                                                                                                                         |
| 249871 | 1.475 Å | Oswald, I. D. H.; Hamilton, A.; Hall, C.; Marshall, W. G.; Prior, T. J.; Pulham, C. R. <i>J. Am. Chem. Soc.</i> <b>2008</b> , <i>130</i> , 17795. Na <sub>2</sub> SO <sub>4</sub> ·7H <sub>2</sub> O                                                                                                 |
| 2895   | 1.476 Å | Nord, A. G. <i>Acta Chem. Scand., Ser. A</i> <b>1973</b> , <i>27</i> , 814. Na <sub>2</sub> SO <sub>4</sub>                                                                                                                                                                                          |
| 2925   | 1.476 Å | Robinson, D. J.; Kennard, C. H. L. <i>Cryst. Struct. Commun.</i> <b>1972</b> , <i>1</i> , 185. K <sub>2</sub> [Cu(H <sub>2</sub> O) <sub>6</sub> ](SO <sub>4</sub> ) <sub>2</sub>                                                                                                                    |
| 60824  | 1.476 Å | Heeg, M. J.; Hurd, A. <i>Acta Crystallogr., Sect. C</i> <b>1987</b> , <i>43</i> , 161. Li <sub>2</sub> NaK(SO <sub>4</sub> ) <sub>2</sub>                                                                                                                                                            |
| 73623  | 1.476 Å | Frech, R.E.; Mattioda, A.; Huang, E. <i>J. Mol. Struct.</i> <b>1993</b> , <i>295</i> , 121. (NH <sub>4</sub> ) <sub>2</sub> (N <sub>2</sub> H <sub>6</sub> )(SO <sub>4</sub> ) <sub>2</sub>                                                                                                          |
| 138008 | 1.476 Å | Vasilchenko, D.; Tkachenko, P.; Tkachev, S.; Popovetskiy, P.; Komarov, V.; Asanova, T.; Asanov, I.; Filatov, E.; Maximovskiy, E.; Gerasimov, E.; Zhurenok, A.; Kozlova, E. <i>Inorg. Chem.</i> <b>2022</b> , <i>61</i> , 9667. [Pt(OH) <sub>2</sub> (H <sub>2</sub> O) <sub>4</sub> ]SO <sub>4</sub> |
| 162314 | 1.476 Å | Bosi, F.; Belardi, G.; Ballirano, P. <i>Am. Miner.</i> <b>2009</b> , <i>94</i> , 47. K <sub>2</sub> [Fe(H <sub>2</sub> O) <sub>6</sub> ](SO <sub>4</sub> ) <sub>2</sub>                                                                                                                              |
| 162315 | 1.476 Å | Bosi, F.; Belardi, G.; Ballirano, P. <i>Am. Miner.</i> <b>2009</b> , <i>94</i> , 47. K <sub>2</sub> [Co(H <sub>2</sub> O) <sub>6</sub> ](SO <sub>4</sub> ) <sub>2</sub>                                                                                                                              |
| 172401 | 1.476 Å | Rudneva, E. B.; Manomenova, V. L.; Malakhova, L. F.; Voloshin, A. E.; Smirnova, T. N. <i>Kristallografiya</i> <b>2006</b> , <i>51</i> , 372. Cs <sub>2</sub> [Ni(H <sub>2</sub> O) <sub>6</sub> ](SO <sub>4</sub> ) <sub>2</sub>                                                                     |
| 249782 | 1.476 Å | Oswald, I. D. H.; Hamilton, A.; Hall, C.; Marshall, W. G.; Prior, T. J.; Pulham, C. R. <i>J. Am. Chem. Soc.</i> <b>2008</b> , <i>130</i> , 17795. Na <sub>2</sub> SO <sub>4</sub> ·8H <sub>2</sub> O                                                                                                 |
| 27654  | 1.477 Å | Mehrotra, B. N.; Hahn, T.; Eysel, W.; Roepke, H.; Illguth, A. <i>Neues Jahrbuch Miner., Monatshefte</i> <b>1978</b> , 408. Na <sub>2</sub> SO <sub>4</sub>                                                                                                                                           |
| 108844 | 1.477 Å | Figgis, B. N.; Kucharski, E. S.; Reynolds, P. A. <i>Acta Crystallogr., Sect. B</i> <b>1990</b> , <i>46</i> , 161. (NH <sub>4</sub> ) <sub>2</sub> [Cr(H <sub>2</sub> O) <sub>6</sub> ](SO <sub>4</sub> ) <sub>2</sub>                                                                                |



|        |         |                                                                                                                                                                                                                                                                                                                    |
|--------|---------|--------------------------------------------------------------------------------------------------------------------------------------------------------------------------------------------------------------------------------------------------------------------------------------------------------------------|
| 136895 | 1.477 Å | Urushihara, D.; Asaka, T.; Harada, M.; Kondo, S.; Nakayama, M.; Ogino, M.; Owaki, E.; Fukuda, K., <i>J. Solid State Chem.</i> <b>2022</b> , <i>306</i> , 122730. Na <sub>2</sub> SO <sub>4</sub>                                                                                                                   |
| 162316 | 1.477 Å | Bosi, F.; Belardi, G.; Ballirano, P. <i>Am. Miner.</i> <b>2009</b> , <i>94</i> , 47. K <sub>2</sub> [Ni(H <sub>2</sub> O) <sub>6</sub> ](SO <sub>4</sub> ) <sub>2</sub>                                                                                                                                            |
| 162317 | 1.477 Å | Bosi, F.; Belardi, G.; Ballirano, P. <i>Am. Miner.</i> <b>2009</b> , <i>94</i> , 47. K <sub>2</sub> [Cu(H <sub>2</sub> O) <sub>6</sub> ](SO <sub>4</sub> ) <sub>2</sub>                                                                                                                                            |
| 28056  | 1.479 Å | Hawthorne, F. C.; Ferguson, R. B. <i>Can. Miner.</i> <b>1975</b> , <i>13</i> , 181. Na <sub>2</sub> SO <sub>4</sub>                                                                                                                                                                                                |
| 138008 | 1.478 Å | Vasilchenko, D.; Tkachenko, P.; Tkachev, S.; Popovetskiy, P.; Komarov, V.; Asanova, T.; Asanov, I.; Filatov, E.; Maximovskiy, E.; Gerasimov, E.; Zhurenok, A.; Kozlova, E. <i>Inorg. Chem.</i> <b>2022</b> , <i>61</i> , 9667. [Pt(OH) <sub>2</sub> (H <sub>2</sub> O) <sub>4</sub> ] <sub>2</sub> SO <sub>4</sub> |
| 143046 | 1.478 Å | Makarova, I.; Selezneva, E.; Canadillas-Delgado, L.; Mossou, E.; Vasiliev, A.; Komornikov, V.; Devishvili, A. <i>Acta Crystallogr., Sect. B</i> <b>2021</b> , <i>77</i> , 266.                                                                                                                                     |
| 145523 | 1.478 Å | Kyono, A.; Ikeda, R.; Takagi, S.; Nishiyasu, W. <i>J. Miner. Petrolog. Sci.</i> <b>2022</b> , <i>117</i> , 220811. CaSO <sub>4</sub> ·0.29H <sub>2</sub> O                                                                                                                                                         |
| 31531  | 1.479 Å | Beaugnon, F.; Quiligotti, S.; Chevreux, Sy.; Wallez, G. <i>Solid State Sci.</i> <b>2020</b> , <i>108</i> , 106399. CaSO <sub>4</sub>                                                                                                                                                                               |
| 74060  | 1.479 Å | Simmons, C. J.; Hitchman, M. A.; Stratemeier, H.; Schultz, A. J. <i>J. Am. Chem. Soc.</i> <b>1993</b> , <i>115</i> , 11304. (NH <sub>4</sub> ) <sub>2</sub> [Cu(H <sub>2</sub> O) <sub>6</sub> ](SO <sub>4</sub> ) <sub>2</sub>                                                                                    |
| 96931  | 1.479 Å | Tregenna-Piggott, P. L. W.; Andres, H. P.; McIntyre, G. J.; Best, S. P.; Wilson, C. C.; Cowan, J. A. <i>Inorg. Chem.</i> <b>2003</b> , <i>42</i> , 1350. Cs[V(D <sub>2</sub> O) <sub>6</sub> ](SO <sub>4</sub> ) <sub>2</sub> ·6H <sub>2</sub> O                                                                   |
| 27751  | 1.480 Å | Kruglik, A. I.; Simonov, M. A.; Aleksandrov, K. S. <i>Kristallografiya</i> <b>1978</b> , <i>23</i> , 494. LiNH <sub>4</sub> SO <sub>4</sub>                                                                                                                                                                        |
| 67702  | 1.480 Å | Graneli, B.; Fischer, P.; Roos, J.; Brinkmann, D.; Hewat, A. W. <i>Phys. B: Cond. Matter</i> <b>1992</b> , <i>180</i> , 612. LiNaSO <sub>4</sub>                                                                                                                                                                   |
| 96933  | 1.480 Å | Tregenna-Piggott, P. L. W.; Andres, H. P.; McIntyre, G. J.; Best, S. P.; Wilson, C. C.; Cowan, J. A. <i>Inorg. Chem.</i> <b>2003</b> , <i>42</i> , 1350. Cs[Ti(D <sub>2</sub> O) <sub>6</sub> ](SO <sub>4</sub> ) <sub>2</sub> ·6H <sub>2</sub> O                                                                  |
| 145509 | 1.481 Å | Kyono, A.; Ikeda, R.; Takagi, S.; Nishiyasu, W. <i>J. Miner. Petrolog. Sci.</i> <b>2022</b> , <i>117</i> , 220811. CaSO <sub>4</sub> ·2H <sub>2</sub> O                                                                                                                                                            |
| 74552  | 1.481 Å | Tahirov, T. H.; Lu, T.-H.; Huang, C.-C.; Chung, C.-S. <i>J. Acta Crystallogr., Sect. C</i> <b>1994</b> , <i>50</i> , 668. (NH <sub>4</sub> ) <sub>2</sub> [Ni(H <sub>2</sub> O) <sub>6</sub> ](SO <sub>4</sub> ) <sub>2</sub>                                                                                      |
| 78195  | 1.481 Å | Yang, Y.-C.; Liu, X.; Zhu, C.-F.; Zhu, L.; Wu, L.-M.; Chen, L. <i>Angew. Chem., Int. Ed.</i> <b>2023</b> , <i>62</i> , e202301404. [Ag(NH <sub>3</sub> ) <sub>2</sub> ] <sub>2</sub> SO <sub>4</sub>                                                                                                               |
| 96931  | 1.481 Å | Tregenna-Piggott, P. L. W.; Andres, H. P.; McIntyre, G. J.; Best, S. P.; Wilson, C. C.; Cowan, J. A. <i>Inorg. Chem.</i> <b>2003</b> , <i>42</i> , 1350. Cs[Mn(D <sub>2</sub> O) <sub>6</sub> ](SO <sub>4</sub> ) <sub>2</sub> ·6H <sub>2</sub> O                                                                  |
| 96937  | 1.481 Å | Tregenna-Piggott, P. L. W.; Andres, H. P.; McIntyre, G. J.; Best, S. P.; Wilson, C. C.; Cowan, J. A. <i>Inorg. Chem.</i> <b>2003</b> , <i>42</i> , 1350. Cs[Ga(D <sub>2</sub> O) <sub>6</sub> ](SO <sub>4</sub> ) <sub>2</sub> ·6H <sub>2</sub> O                                                                  |
| 201210 | 1.481 Å | Beattie, J. K.; Best, S. P.; Skelton, B. W.; White, A. H. <i>J. Chem. Soc., Dalton Trans.</i> <b>1981</b> , 2105. Cs[V(H <sub>2</sub> O) <sub>6</sub> ](SO <sub>4</sub> ) <sub>2</sub> ·6H <sub>2</sub> O                                                                                                          |

|             |                               |                                                                                                                                                                                                                                                                                                    |
|-------------|-------------------------------|----------------------------------------------------------------------------------------------------------------------------------------------------------------------------------------------------------------------------------------------------------------------------------------------------|
| 280384      | 1.481 Å                       | Figgis, B. N.; Sobolev, A. N.; Simmons, C. J.; Hitchman, M. A.; Stratemeier, H.; Riley, M. J. <i>Acta Crystallogr., Sect. B</i> <b>2000</b> , <i>56</i> , 438. (NH <sub>4</sub> ) <sub>2</sub> [Cu(H <sub>2</sub> O) <sub>6</sub> ](SO <sub>4</sub> ) <sub>2</sub>                                 |
| 81463       | 1.483 Å                       | Rauw, W.; Ahsbabs, H.; Hitchman, M. A.; Lukin, S.; Reinen, D.; Schultz, A. J.; Simmons, C. J.; Stratemeier, H. <i>Inorg. Chem.</i> <b>1996</b> , <i>35</i> , 1902. K <sub>2</sub> [Cu(H <sub>2</sub> O) <sub>6</sub> ](SO <sub>4</sub> ) <sub>2</sub>                                              |
| 139224      | 1.483 Å                       | Gatta, G. D.; Guastella, G.; Guastoni, A.; Gagliard, V.; Cañadillas-Delgado, L.; Fernandez-Diaz, M. T. <i>Am. Miner.</i> <b>2023</b> , <i>108</i> , 354. (NH <sub>4</sub> ) <sub>2</sub> [Mg <sub>0.963</sub> Mn <sub>0.037</sub> (H <sub>2</sub> O) <sub>6</sub> ](SO <sub>4</sub> ) <sub>2</sub> |
| 138469      | 1.486 Å                       | Griesemer, S. D.; Ward, L.; Wolverton, C. <i>Phys. Rev. Mater.</i> <b>2021</b> , <i>5</i> , 105003. CsLiSO <sub>4</sub>                                                                                                                                                                            |
| 138651      | 1.487 Å                       | Griesemer, S. D.; Ward, L.; Wolverton, C. <i>Phys. Rev. Mater.</i> <b>2021</b> , <i>5</i> , 105003. RbLiSO <sub>4</sub>                                                                                                                                                                            |
| 138912      | 1.487 Å                       | Griesemer, S. D.; Ward, L.; Wolverton, C. <i>Phys. Rev. Mater.</i> <b>2021</b> , <i>5</i> , 105003. RbLiSO <sub>4</sub>                                                                                                                                                                            |
| 411348      | 1.488 Å                       | Prescott, H. A.; Troyanov, S. I.; Kemnitz, E. <i>J. Solid State Chem.</i> <b>2001</b> , <i>156</i> , 415. Na <sub>2</sub> SO <sub>4</sub> ·10H <sub>2</sub> O                                                                                                                                      |
| 15187       | 1.489 Å                       | Robinson, P. D.; Fang, J. H. <i>Am. Miner.</i> <b>1969</b> , <i>54</i> , 19. Na[Al(H <sub>2</sub> O) <sub>6</sub> ](SO <sub>4</sub> ) <sub>2</sub>                                                                                                                                                 |
| 438         | 1.494 Å                       | Nord, A. G. <i>Acta Chem. Scand., Ser. A</i> <b>1976</b> , <i>30</i> , 198. Cs <sub>2</sub> SO <sub>4</sub>                                                                                                                                                                                        |
| <b>Mean</b> | <b>1.473 Å/138 structures</b> |                                                                                                                                                                                                                                                                                                    |

**Thiosulfate ion, S<sub>2</sub>O<sub>3</sub><sup>2-</sup>**

| ICSD/CSD code | <i>d(S-O)+d(S-S)</i> | Reference                                                                                                                                                                                                                                                                                       |
|---------------|----------------------|-------------------------------------------------------------------------------------------------------------------------------------------------------------------------------------------------------------------------------------------------------------------------------------------------|
| KOLXOY        | 1.446 + 1.969 Å      | Freire, E.; Baggio, S.; Momburu, A.; Baggio, R. <i>Acta Crystallogr., Sect. C</i> <b>2000</b> , <i>56</i> , 541. [Ni(C <sub>10</sub> H <sub>8</sub> N <sub>2</sub> ) <sub>3</sub> ](S <sub>2</sub> O <sub>3</sub> )·7H <sub>2</sub> O                                                           |
| 4436          | 1.456 + 1.996 Å      | Csordas, L. <i>Acta Chim. Acad. Sci. Hung.</i> <b>1969</b> , <i>62</i> , 371. K <sub>2</sub> S <sub>2</sub> O <sub>3</sub> ·0.33H <sub>2</sub> O                                                                                                                                                |
| 9054          | 1.456 + 1.941 Å      | Padmanabhan, V. M.; Yadava, V. S.; Navarro, Q. O.; Garcia, A.; Karsono, L.; Suh, I.-H.; Chien, L. S. <i>Acta Crystallogr., Sect. B</i> <b>1971</b> , <i>27</i> , 253. Na <sub>2</sub> S <sub>2</sub> O <sub>3</sub> ·5H <sub>2</sub> O.                                                         |
| MOPSIV        | 1.456 + 1.979 Å      | Dabrowska, A.; Chojnacki, J. Z. <i>Krist. Cryst. Mater.</i> <b>2014</b> , <i>229</i> , 555. (H <sub>3</sub> N-C <sub>6</sub> H <sub>11</sub> ) <sub>2</sub> S <sub>2</sub> O <sub>3</sub>                                                                                                       |
| MOPSOB        | 1.456 + 1.997 Å      | Dabrowska, A.; Chojnacki, J. Z. <i>Krist. Cryst. Mater.</i> <b>2014</b> , <i>229</i> , 555. (H <sub>3</sub> N(CH <sub>2</sub> ) <sub>6</sub> NH <sub>3</sub> )(NH <sub>4</sub> ) <sub>2</sub> (S <sub>2</sub> O <sub>3</sub> ) <sub>2</sub>                                                     |
| 2428          | 1.458 + 2.016 Å      | Elerman, Y.; Uraz, A. A.; Armagan, N. <i>Acta Crystallogr., Sect. B</i> <b>1978</b> , <i>34</i> , 3330. [Ni(H <sub>2</sub> O) <sub>6</sub> ](S <sub>2</sub> O <sub>3</sub> ) <sub>2</sub>                                                                                                       |
| LICCIK        | 1.460 + 1.982 Å      | de Vivar, M. E. D.; Baggio, S.; Garland, M. T.; Baggio, R. <i>Acta Crystallogr., Sect. C</i> <b>2007</b> , <i>63</i> , m153. [Ni(C <sub>10</sub> H <sub>8</sub> N <sub>2</sub> )(H <sub>2</sub> O) <sub>4</sub> ] <sub>n</sub> (S <sub>2</sub> O <sub>3</sub> ) <sub>n</sub> ·7H <sub>2</sub> O |
| ROKHII        | 1.460 + 1.982 Å      | Baggio, S.; Pardo, M. I.; Baggio, R.; Garland, M. T. <i>Acta Crystallogr., Sect. C</i> <b>1997</b> , <i>53</i> , 1570. [Zn(C <sub>10</sub> H <sub>8</sub> N <sub>2</sub> )(H <sub>2</sub> O) <sub>4</sub> ] <sub>n</sub> (S <sub>2</sub> O <sub>3</sub> ) <sub>n</sub> ·7H <sub>2</sub> O       |
| EVAVUT        | 1.461 + 1.997 Å      | Yang, Y.-X.; Ng, S. W. <i>Acta Crystallogr., Sect. E</i> <b>2011</b> , <i>67</i> , o1664. ((CH <sub>3</sub> ) <sub>4</sub> N) <sub>2</sub> S <sub>2</sub> O <sub>3</sub> ·4H <sub>2</sub> O                                                                                                     |
| GINDUC        | 1.461 + 2.008 Å      | Leyten, W.; Rettig, S. J.; Trotter, J. <i>Acta Crystallogr., Sect. C</i> <b>1988</b> , <i>44</i> , 1749. (C <sub>2</sub> H <sub>5</sub> ) <sub>4</sub> N) <sub>2</sub> (S <sub>2</sub> O <sub>3</sub> )·2H <sub>2</sub> O                                                                       |
| 425887        | 1.463 + 2.012 Å      | Lehner, A. J.; Schindler, L. V.; Roehr, C. Z. <i>Naturforsch., Sect. B</i> <b>2013</b> , <i>68</i> , 323. K <sub>6</sub> (S <sub>2</sub> O <sub>3</sub> ) <sub>3</sub> ·H <sub>2</sub> O                                                                                                        |
| 24841         | 1.465 + 2.011 Å      | Elerman, Y.; Fuess, H.; Joswig, W. <i>Acta Crystallogr., Sect. B</i> <b>1982</b> , <i>38</i> , 1799. [Mg(H <sub>2</sub> O) <sub>6</sub> ](S <sub>2</sub> O <sub>3</sub> ) <sub>2</sub>                                                                                                          |
| 425886        | 1.465 + 2.002 Å      | Lehner, A. J.; Schindler, L. V.; Roehr, C. Z. <i>Naturforsch., Sect. B</i> <b>2013</b> , <i>68</i> , 323. K <sub>2</sub> S <sub>2</sub> O <sub>3</sub>                                                                                                                                          |
| 432518        | 1.465 + 1.993 Å      | Funk, C.; Schleid, T. Z. <i>Kristallogr., Suppl. Issue</i> <b>2017</b> , <i>37</i> , 108. Cs <sub>2</sub> S <sub>2</sub> O <sub>3</sub>                                                                                                                                                         |
| PUMTUM        | 1.465 + 1.987 Å      | Tong Jiang; Lough, A.; Ozin, G. A.; Bedard, R. L. <i>J. Mater. Chem.</i> <b>1998</b> , <i>8</i> , 733. (C <sub>10</sub> H <sub>18</sub> N) <sub>2</sub> S <sub>2</sub> O <sub>3</sub>                                                                                                           |
| 2226          | 1.466 + 2.025 Å      | Lisensky, G. C.; Levy, H. A. <i>Acta Crystallogr., Sect. B</i> <b>1978</b> , <i>34</i> , 1975. Na <sub>2</sub> S <sub>2</sub> O <sub>3</sub> ·5H <sub>2</sub> O                                                                                                                                 |
| 24842         | 1.466 + 2.047 Å      | Elerman, Y.; Fuess, H.; Joswig, W. <i>Acta Crystallogr., Sect. B</i> <b>1982</b> , <i>38</i> , 1799. [Mg(H <sub>2</sub> O) <sub>6</sub> ](S <sub>2</sub> O <sub>3</sub> ) <sub>2</sub>                                                                                                          |
| 34705         | 1.466 + 2.012 Å      | Baggio, S.; Amzel, L.M.; Becka, L.N. <i>Acta Crystallogr., Sect. B</i> <b>1969</b> , <i>25</i> , 2650. [Mg(H <sub>2</sub> O) <sub>6</sub> ](S <sub>2</sub> O <sub>3</sub> ) <sub>2</sub>                                                                                                        |
| 37093         | 1.466 + 2.001 Å      | von Benda, H.; von Benda, K. Z. <i>Naturforsch., Teil B</i> <b>1979</b> , <i>34</i> , 957. Na <sub>2</sub> S <sub>2</sub> O <sub>3</sub>                                                                                                                                                        |
| 279595        | 1.466 + 2.016 Å      | Prasad, S. M.; Rani, A. <i>Acta Crystallogr., Sect. E</i> <b>2001</b> , <i>57</i> , 67. Na <sub>2</sub> S <sub>2</sub> O <sub>3</sub> ·5H <sub>2</sub> O                                                                                                                                        |
| 15476         | 1.467 + 2.018 Å      | Sandor, E.; Csordas, L. <i>Acta Crystallogr.</i> <b>1961</b> , <i>14</i> , 237. Na <sub>2</sub> S <sub>2</sub> O <sub>3</sub>                                                                                                                                                                   |
| 59268         | 1.467 + 1.982 Å      | Sobolev, A. N.; Figgis, B. N. <i>Acta Crystallogr., Sect. C</i> <b>1997</b> , <i>53</i> , 661. [Co(NH <sub>3</sub> ) <sub>6</sub> ](S <sub>2</sub> O <sub>3</sub> )Cl·H <sub>2</sub> O                                                                                                          |
| 936           | 1.468 + 2.016 Å      | Uraz, A. A.; Armagan, N. <i>Acta Crystallogr., Sect. B</i> <b>1977</b> , <i>33</i> , 1396. Na <sub>2</sub> S <sub>2</sub> O <sub>3</sub> ·5H <sub>2</sub> O                                                                                                                                     |
| 59815         | 1.468 + 2.008 Å      | Held, P.; Bohaty, L. <i>Acta Crystallogr., Sect. C</i> <b>2004</b> , <i>60</i> , i97. CaS <sub>2</sub> O <sub>3</sub> ·6H <sub>2</sub> O                                                                                                                                                        |
| 425888        | 1.468 + 2.030 Å      | Lehner, A. J.; Schindler, L. V.; Roehr, C. Z. <i>Naturforsch., Sect. B</i> <b>2013</b> , <i>68</i> , 323. Rb <sub>2</sub> S <sub>2</sub> O <sub>3</sub> ·H <sub>2</sub> O                                                                                                                       |
| MOPSER        | 1.468 + 2.017 Å      | Dabrowska, A.; Chojnacki, J. Z. <i>Krist. Cryst. Mater.</i> <b>2014</b> , <i>229</i> , 555. (H <sub>3</sub> N- <i>t</i> -C <sub>4</sub> H <sub>9</sub> ) <sub>2</sub> S <sub>2</sub> O <sub>3</sub> ·H <sub>2</sub> O                                                                           |

|        |                 |                                                                                                                                                                                                                                                                             |
|--------|-----------------|-----------------------------------------------------------------------------------------------------------------------------------------------------------------------------------------------------------------------------------------------------------------------------|
| 100282 | 1.469 + 1.965 Å | Aka, Y.; Armagan, N.; Aydin Uraz, A. <i>Z. Kristallogr.</i> <b>1980</b> , <i>151</i> , 61. BaS <sub>2</sub> O <sub>3</sub> ·H <sub>2</sub> O                                                                                                                                |
| 417161 | 1.469 + 1.977 Å | Sharma, R.P.; Bala, R.; Pretto, L.; Ferretti, V.; Du Yu; Hong, Y. <i>J. Mol. Struct.</i> <b>2007</b> , <i>842</i> , 6. [Co(NH <sub>3</sub> ) <sub>6</sub> ]BrS <sub>2</sub> O <sub>3</sub> ·H <sub>2</sub> O                                                                |
| XIGSIR | 1.469 + 1.983 Å | Srinivasan, B. R.; Khandolkar, S. S.; Jyai, R. N.; Ravikumar, K.; Sridhar, B.; Natarajan, S. <i>Spectrochim. Acta, Ser. A</i> <b>2013</b> , <i>102</i> , 235. (H <sub>3</sub> N(CH <sub>2</sub> ) <sub>2</sub> NH <sub>3</sub> ) <sub>2</sub> S <sub>2</sub> O <sub>3</sub> |
| 35664  | 1.470 + 2.019 Å | Elerman, Y.; Bats, J. W.; Fuess, H. <i>Acta Crystallogr., Sect. B</i> <b>1983</b> , <i>39</i> , 515. [Mg(H <sub>2</sub> O) <sub>6</sub> ]S <sub>2</sub> O <sub>3</sub>                                                                                                      |
| 430930 | 1.470 + 2.028 Å | Winkler, V.; Schlosser, M.; Pfitzner, A. <i>Z. Naturforsch., Sect. B</i> <b>2016</b> , <i>71</i> , 579. Cs <sub>2</sub> S <sub>2</sub> O <sub>3</sub> ·H <sub>2</sub> O                                                                                                     |
| 8126   | 1.471 + 1.979 Å | Teng, S. T.; Fuess, H.; Bats, J. W. <i>Acta Crystallogr., Sect. B</i> <b>1979</b> , <i>35</i> , 1682. (NH <sub>4</sub> ) <sub>2</sub> S <sub>2</sub> O <sub>3</sub>                                                                                                         |
| 16035  | 1.471 + 2.012 Å | Baggio, S.; Amzel, L.; Becka, L. N. <i>Acta Crystallogr., Sect. B</i> <b>1969</b> , <i>25</i> , 1650. [Mg(H <sub>2</sub> O) <sub>6</sub> ]S <sub>2</sub> O <sub>3</sub>                                                                                                     |
| 37094  | 1.472 + 1.999 Å | von Benda, H.; von Benda, K. <i>Z. Naturforsch., Teil B</i> <b>1979</b> , <i>34</i> , 957. Na <sub>2</sub> S <sub>2</sub> O <sub>3</sub>                                                                                                                                    |
| 52210  | 1.472 + 2.022 Å | Klein, W. <i>Acta Crystallogr., Sect. E</i> <b>2023</b> , <i>79</i> , 44. Na <sub>2</sub> S <sub>2</sub> O <sub>3</sub> ·5H <sub>2</sub> O                                                                                                                                  |
| 72924  | 1.472 + 1.996 Å | Hesse, W.; Leutner, B.; Boehn, K. H.; Walker, N. P. C. <i>Acta Crystallogr., Sect. C</i> <b>1993</b> , <i>49</i> , 363. Na <sub>2</sub> S <sub>2</sub> O <sub>3</sub> ·0.667H <sub>2</sub> O                                                                                |
| UCIDAP | 1.472 + 2.013 Å | Liu, Y.; Liu, X.; Xiong, Z.; Liu, B.; Xu, J.; Li, L.; Zhao, S.; Lin, Z.; Hong, M.; Luo, J. <i>Inorg. Chem.</i> <b>2021</b> , <i>60</i> , 14544. (C(NH <sub>2</sub> ) <sub>3</sub> ) <sub>2</sub> S <sub>2</sub> O <sub>3</sub>                                              |
| GANVEY | 1.473 + 2.006 Å | Seidlhofer, B.; Nather, C.; Bensch, W. <i>Acta Crystallogr., Sect. E</i> <b>2012</b> , <i>68</i> , m167. [Ni <sub>3</sub> H <sub>26</sub> N <sub>6</sub> ]S <sub>2</sub> O <sub>3</sub> ·3H <sub>2</sub> O                                                                  |
| 684    | 1.474 + 2.004 Å | Klein, W. <i>Acta Crystallogr., Sect. E</i> <b>2020</b> , <i>76</i> , 197. SrS <sub>2</sub> O <sub>3</sub> ·H <sub>2</sub> O                                                                                                                                                |
| LERKOK | 1.474 + 1.990 Å | Okuniewski, A.; Chojnacki, J.; Baranowska, K.; Becker, B. <i>Acta Crystallogr., Sect. C</i> <b>2013</b> , <i>69</i> , 195. (H <sub>2</sub> N( <i>i</i> -C <sub>3</sub> H <sub>7</sub> ) <sub>2</sub> ) <sub>2</sub> S <sub>2</sub> O <sub>3</sub>                           |
| 59816  | 1.475 + 1.995 Å | Held, P.; Bohaty, L. <i>Acta Crystallogr., Sect. C</i> <b>2004</b> , <i>60</i> , i97. SrS <sub>2</sub> O <sub>3</sub> ·5H <sub>2</sub> O                                                                                                                                    |
| 60026  | 1.475 + 2.005 Å | Teng, S. T.; Fuess, H.; Bats, J.W. <i>Acta Crystallogr., Sect. C</i> <b>1984</b> , <i>40</i> , 1785. Na <sub>2</sub> S <sub>2</sub> O <sub>3</sub>                                                                                                                          |
| DMSOST | 1.475 + 2.001 Å | Jansen, M.; Wiench, D. M. <i>Cryst. Struct. Commun.</i> <b>1978</b> , <i>7</i> , 423. Na <sub>2</sub> S <sub>2</sub> O <sub>3</sub> ·(CH <sub>3</sub> ) <sub>2</sub> SO                                                                                                     |
| PADBEC | 1.475 + 2.004 Å | Nelson, J.; Nieuwenhuyzen, M.; Pal, I.; Town, R. M. <i>Dalton Trans.</i> <b>2004</b> , 2003. (C <sub>30</sub> H <sub>54</sub> N <sub>8</sub> O <sub>3</sub> )(S <sub>2</sub> O <sub>3</sub> )(ClO <sub>4</sub> ) <sub>4</sub> ·8H <sub>2</sub> O                            |
| LERKUQ | 1.475 + 1.994 Å | Okuniewski, A.; Chojnacki, J.; Baranowska, K.; Becker, B. <i>Acta Crystallogr., Sect. C</i> <b>2013</b> , <i>69</i> , 195. (H <sub>2</sub> N( <i>t</i> -C <sub>4</sub> H <sub>9</sub> ) <sub>2</sub> ) <sub>2</sub> S <sub>2</sub> O <sub>3</sub>                           |
| MEGXON | 1.475 + 1.952 Å | Basu, A.; Das, G. <i>Dalton Trans.</i> <b>2012</b> , <i>41</i> , 10792. ((C <sub>2</sub> H <sub>5</sub> ) <sub>4</sub> N) <sub>2</sub> S <sub>2</sub> O <sub>3</sub> ·2N(C <sub>9</sub> H <sub>10</sub> ClN <sub>2</sub> S) <sub>3</sub>                                    |
| RAZQIV | 1.475 + 2.010 Å | Brozdowska, A.; Chojnacki, J. <i>Acta Crystallogr., Sect. B</i> <b>2017</b> , <i>73</i> , 507. (H <sub>3</sub> N(CH <sub>2</sub> ) <sub>5</sub> NH <sub>3</sub> )S <sub>2</sub> O <sub>3</sub> ·H <sub>2</sub> O                                                            |
| 35665  | 1.476 + 2.018 Å | Elerman, Y.; Bats, J. W.; Fuess, H. <i>Acta Crystallogr., Sect. B</i> <b>1983</b> , <i>39</i> , 515. [Mg(H <sub>2</sub> O) <sub>6</sub> ]S <sub>2</sub> O <sub>3</sub>                                                                                                      |
| 52206  | 1.476 + 2.006 Å | Klein, W. <i>Acta Crystallogr., Sect. E</i> <b>2023</b> , <i>79</i> , 44. Na <sub>2</sub> S <sub>2</sub> O <sub>3</sub> ·2H <sub>2</sub> O                                                                                                                                  |
| 60022  | 1.476 + 2.006 Å | Teng, S. T.; Fuess, H.; Bats, J.W. <i>Acta Crystallogr., Sect. C</i> <b>1984</b> , <i>40</i> , 1785. Na <sub>2</sub> S <sub>2</sub> O <sub>3</sub>                                                                                                                          |

|                   |                                      |                                                                                                                                                                                                                                                                          |
|-------------------|--------------------------------------|--------------------------------------------------------------------------------------------------------------------------------------------------------------------------------------------------------------------------------------------------------------------------|
| AROWUA            | 1.476 + 1.984 Å                      | Srinivasan, B. R.; Naik, A. R.; Dhuri, S. N.; Nather, C.; Bensch, W. <i>J. Chem. Sci. (Bangalore)</i> <b>2011</b> , <i>123</i> , 55. (C <sub>4</sub> H <sub>12</sub> N <sub>2</sub> )S <sub>2</sub> O <sub>3</sub> ·H <sub>2</sub> O                                     |
| QIXPIW            | 1.476 + 1.994 Å                      | Maubert, B. M.; Nelson, J.; McKee, V.; Town, R. T.; Pal, I. <i>J. Chem. Soc., Dalton Trans.</i> <b>2001</b> , 1395. (C <sub>36</sub> H <sub>60</sub> N <sub>8</sub> O <sub>3</sub> )(S <sub>2</sub> O <sub>3</sub> )(ClO <sub>4</sub> ) <sub>4</sub> ·11H <sub>2</sub> O |
| 140               | 1.477 + 1.979 Å                      | Manojlovic Muir, L.M. <i>Acta Crystallogr., Sect. B</i> <b>1975</b> , <i>31</i> , 135. BaS <sub>2</sub> O <sub>3</sub> ·H <sub>2</sub> O                                                                                                                                 |
| NAGTUN            | 1.478 + 2.005 Å                      | Seck, G. A.; Sene, A.; Diop, L.; Maris, T. <i>Acta Crystallogr., Sect. E</i> <b>2016</b> , <i>72</i> , 273. (C <sub>6</sub> H <sub>13</sub> N <sub>2</sub> ) <sub>2</sub> S <sub>2</sub> O <sub>3</sub> ·2H <sub>2</sub> O                                               |
| IZAVAG            | 1.480 + 1.989 Å                      | Diaz de Vivar, M. E.; Baggio, S.; Ibanez, A.; Baggio, R. <i>Acta Crystallogr., Sect. E</i> <b>2023</b> , <i>79</i> , 44. [ZnC <sub>8</sub> H <sub>24</sub> N <sub>2</sub> (H <sub>2</sub> O) <sub>2</sub> S <sub>2</sub> O <sub>3</sub>                                  |
| RAZQOB            | 1.481 + 1.991 Å                      | Brozdowska, A.; Chojnacki, J. <i>Acta Crystallogr., Sect. B</i> <b>2017</b> , <i>73</i> , 507. (H <sub>3</sub> N(CH <sub>2</sub> ) <sub>6</sub> NH <sub>3</sub> )S <sub>2</sub> O <sub>3</sub> ·H <sub>2</sub> O                                                         |
| 23881             | 1.482 + 2.020 Å                      | Nardelli, M.; Fava, G.; Giraldi, G. <i>Acta Crystallogr.</i> <b>1962</b> , <i>15</i> , 227. [Mg(H <sub>2</sub> O) <sub>6</sub> ]S <sub>2</sub> O <sub>3</sub>                                                                                                            |
| RAZQAN            | 1.482 + 2.009 Å                      | Brozdowska, A.; Chojnacki, J. <i>Acta Crystallogr., Sect. B</i> <b>2017</b> , <i>73</i> , 507. (H <sub>3</sub> N(CH <sub>2</sub> ) <sub>3</sub> NH <sub>3</sub> )S <sub>2</sub> O <sub>3</sub> ·H <sub>2</sub> O                                                         |
| RAZPOA            | 1.484 + 1.992 Å                      | Brozdowska, A.; Chojnacki, J. <i>Acta Crystallogr., Sect. B</i> <b>2017</b> , <i>73</i> , 507. (C <sub>3</sub> H <sub>12</sub> N <sub>2</sub> )S <sub>2</sub> O <sub>3</sub> ·H <sub>2</sub> O                                                                           |
| UQUYAI            | 1.486 + 1.986 Å                      | Guchhait, T.; Mani, G.; Schulzke, C. <i>Dalton Trans.</i> <b>2016</b> , <i>45</i> , 11781. (C <sub>32</sub> H <sub>48</sub> N <sub>6</sub> )S <sub>2</sub> O <sub>3</sub>                                                                                                |
| RAZQAN            | 1.487 + 2.002 Å                      | Brozdowska, A.; Chojnacki, J. <i>Acta Crystallogr., Sect. B</i> <b>2017</b> , <i>73</i> , 507. (H <sub>3</sub> N(CH <sub>2</sub> ) <sub>4</sub> NH <sub>3</sub> )S <sub>2</sub> O <sub>3</sub> ·H <sub>2</sub> O                                                         |
| <b>Total mean</b> | <b>1.470 + 2.000 Å/60 structures</b> |                                                                                                                                                                                                                                                                          |

## Selenite ion, SeO<sub>3</sub><sup>2-</sup>

| ICSD/CSD code | <i>d</i> (Se-O) | Reference                                                                                                                                                                                                                                                                                                                                                                                     |
|---------------|-----------------|-----------------------------------------------------------------------------------------------------------------------------------------------------------------------------------------------------------------------------------------------------------------------------------------------------------------------------------------------------------------------------------------------|
| VEXCAD        | 1.676 Å         | Wiechoczek, M.; Jones, P. G. <i>Z. Naturforsch., Teil B</i> <b>2006</b> , <i>61</i> , 1401. (C <sub>4</sub> H <sub>12</sub> N) <sub>2</sub> (SeO <sub>3</sub> )                                                                                                                                                                                                                               |
| 183813        | 1.648 Å         | Pushkin, D. V.; Peresypkina, E. V.; Serezhkina, L. B.; Savchenkov, A. V.; Virovets, A. V.; Serezhkin, V.N. <i>Zh. Neorg. Khim.</i> <b>2012</b> , <i>57</i> , 216-221; <i>Russ. J. Inorg. Chem.</i> <b>2012</b> , <i>57</i> , 175-180.<br>(C(NH <sub>2</sub> ) <sub>3</sub> ) <sub>2</sub> [(UO <sub>2</sub> ) <sub>2</sub> (C <sub>2</sub> O <sub>4</sub> )(SeO <sub>3</sub> ) <sub>2</sub> ] |
| MAQGIY        | 1.678 Å         | Al Isawi, W. A.; Zeller, M.; Mezei, G. <i>Cryst. Growth Des.</i> <b>2022</b> , <i>22</i> , 1398.<br>(C <sub>22</sub> H <sub>24</sub> N)(N( <i>n</i> -C <sub>4</sub> H <sub>9</sub> )SeO <sub>3</sub> )[Cu <sub>28</sub> C <sub>84</sub> H <sub>112</sub> N <sub>56</sub> O <sub>28</sub> ] <sub>2</sub> ·1.327C <sub>6</sub> H <sub>4</sub> Cl <sub>2</sub>                                   |
| IKUWIX        | 1.685 Å         | Ayadi, R.; Lhoste, J.; Rak, I. L.; Mhiri, T.; Boujelbene, M. <i>J. Saudi Chem. Soc.</i> <b>2017</b> , <i>21</i> , 869.<br>(H <sub>3</sub> N(CH <sub>2</sub> ) <sub>3</sub> NH <sub>3</sub> ) <sub>2</sub> SeO <sub>3</sub> SeO <sub>4</sub> ·4H <sub>2</sub> O                                                                                                                                |
| TUYMOP        | 1.686 Å         | Havlicek, D.; Chudoba, V.; Nemeč, I.; Cisarova, I.; Micka, Z. <i>J. Mol. Struct.</i> <b>2002</b> , <i>606</i> , 101.<br>(C <sub>4</sub> H <sub>12</sub> N <sub>2</sub> )(SeO <sub>3</sub> )·H <sub>2</sub> O                                                                                                                                                                                  |
| KOBFEO        | 1.686 Å         | Jmal, A.; Oueslati, A.; Hamdi, B.; Jarraya, K. <i>Solid State Sci.</i> <b>2017</b> , <i>64</i> , 99. (C <sub>6</sub> H <sub>5</sub> CH <sub>2</sub> NH <sub>3</sub> ) <sub>2</sub> SeO <sub>3</sub> ·H <sub>2</sub> O                                                                                                                                                                         |
| TUYMOP        | 1.686 Å         | Havlicek, D.; Chudoba, V.; Nemeč, I.; Cisarova, I.; Micka, Z. <i>J. Mol. Struct.</i> <b>2002</b> , <i>606</i> , 101.<br>(C <sub>4</sub> H <sub>12</sub> N <sub>2</sub> )SeO <sub>3</sub> ·H <sub>2</sub> O                                                                                                                                                                                    |
| 137592        | 1.687 Å         | Albrecht, R.; Doert, T.; Ruck, M. <i>Acta Crystallogr., Sect. E</i> <b>2022</b> , <i>78</i> , 615. K <sub>2</sub> SeO <sub>3</sub>                                                                                                                                                                                                                                                            |
| YASHAC        | 1.687 Å         | Todd, M. J.; Harrison, W. T. A. <i>Acta Crystallogr., Sect. E</i> <b>2005</b> , <i>61</i> , o1538. (C <sub>3</sub> H <sub>12</sub> N <sub>2</sub> )(SeO <sub>3</sub> )·H <sub>2</sub> O                                                                                                                                                                                                       |
| BAYBUZ        | 1.689 Å         | Chudoba, V.; Micka, Z.; Havlicek, D.; Cisarova, I.; Nemeč, I.; Robinson, W. T. <i>J. Solid State Chem.</i> <b>2003</b> , <i>170</i> , 390. (C <sub>4</sub> H <sub>14</sub> N <sub>2</sub> )(SeO <sub>3</sub> )·H <sub>2</sub> O                                                                                                                                                               |
| 420179        | 1.691 Å         | Burns, W. L.; Ibers, J. A. <i>J. Solid State Chem.</i> <b>2009</b> , <i>182</i> , 1457-1461. Cs(UO <sub>2</sub> )(SeO <sub>3</sub> )(HSeO <sub>3</sub> )·3H <sub>2</sub> O                                                                                                                                                                                                                    |
| BAYCEK        | 1.692 Å         | Chudoba, V.; Micka, Z.; Havlicek, D.; Cisarova, I.; Nemeč, I.; Robinson, W. T. <i>J. Solid State Chem.</i> <b>2003</b> , <i>170</i> , 390. (C <sub>3</sub> H <sub>12</sub> N <sub>2</sub> )(SeO <sub>3</sub> )·2H <sub>2</sub> O                                                                                                                                                              |
| 184743        | 1.698 Å         | Kong Fang; Hu Chunli; Xu Xiang; Zhou Tianhua; Mao Jianguo <i>Dalton Trans.</i> <b>2012</b> , <i>41</i> , 5687-5695.<br>Rb <sub>4</sub> (Mo <sub>5</sub> O <sub>15</sub> )(SeO <sub>3</sub> ) <sub>2</sub> ·2H <sub>2</sub> O                                                                                                                                                                  |
| 280981        | 1.698 Å         | Wickleder, M. S. <i>Acta Crystallogr., Sect. E</i> <b>2002</b> , <i>58</i> , 103-104. Na <sub>2</sub> SeO <sub>3</sub>                                                                                                                                                                                                                                                                        |
| VEXCEH        | 1.698 Å         | Wiechoczek, M.; Jones, P. G. <i>Z. Naturforsch., Teil B</i> <b>2006</b> , <i>61</i> , 1401. (C <sub>4</sub> H <sub>12</sub> N) <sub>2</sub> (SeO <sub>3</sub> )·1.5H <sub>2</sub> O                                                                                                                                                                                                           |
| 184742        | 1.700 Å         | Kong Fang; Hu Chunli; Xu Xiang; Zhou Tianhua; Mao Jianguo <i>Dalton Trans.</i> <b>2012</b> , <i>41</i> , 5687-5695.<br>K <sub>4</sub> (Mo <sub>5</sub> O <sub>15</sub> )(SeO <sub>3</sub> ) <sub>2</sub> ·2H <sub>2</sub> O                                                                                                                                                                   |
| BAYCIO        | 1.700 Å         | Chudoba, V.; Micka, Z.; Havlicek, D.; Cisarova, I.; Nemeč, I.; Robinson, W. T. <i>J. Solid State Chem.</i> <b>2003</b> , <i>170</i> , 390. (C <sub>2</sub> H <sub>10</sub> N <sub>2</sub> )(SeO <sub>3</sub> )                                                                                                                                                                                |
| 184744        | 1.701 Å         | Kong Fang; Hu Chunli; Xu Xiang; Zhou Tianhua; Mao Jianguo <i>Dalton Trans.</i> <b>2012</b> , <i>41</i> , 5687-5695.<br>Rb <sub>4</sub> (Mo <sub>5</sub> O <sub>15</sub> )(SeO <sub>3</sub> ) <sub>2</sub> ·2H <sub>2</sub> O                                                                                                                                                                  |

|             |                              |                                                                                                                                                                                                                       |
|-------------|------------------------------|-----------------------------------------------------------------------------------------------------------------------------------------------------------------------------------------------------------------------|
| 3344        | 1.707 Å                      | Liang, M.-L.; Ma, Y.-X.; Hu, C.-L.; Kong, F.; Mao, J.-G. <i>Dalton Trans.</i> <b>2018</b> , 47, 1513. Ba(VO <sub>2</sub> F)SeO <sub>3</sub>                                                                           |
| 3343        | 1.711 Å                      | Liang, M.-L.; Ma, Y.-X.; Hu, C.-L.; Kong, F.; Mao, J.-G. <i>Dalton Trans.</i> <b>2018</b> , 47, 1513. Sr(VO <sub>2</sub> F)SeO <sub>3</sub>                                                                           |
| 184745      | 1.715 Å                      | Kong Fang; Hu Chunli; Xu Xiang; Zhou Tianhua; Mao Jianguo <i>Dalton Trans.</i> <b>2012</b> , 41, 5687-5695.<br>HRb <sub>3</sub> (Mo <sub>5</sub> O <sub>15</sub> )(SeO <sub>3</sub> ) <sub>2</sub> ·2H <sub>2</sub> O |
| <b>Mean</b> | <b>1.691 Å/21 structures</b> |                                                                                                                                                                                                                       |



## Selenate ion, SeO<sub>4</sub><sup>2-</sup>

| ICSD/CSD code | d(Se-O) | Reference                                                                                                                                                                                                                                                                                |
|---------------|---------|------------------------------------------------------------------------------------------------------------------------------------------------------------------------------------------------------------------------------------------------------------------------------------------|
| 73411         | 1.600 Å | Fabry, J.; Breczewski, T. <i>Acta Crystallogr., Sect. C</i> <b>1993</b> , <i>49</i> , 1724. Tl <sub>2</sub> SeO <sub>4</sub>                                                                                                                                                             |
| STOSEH10      | 1.603 Å | Neidle, S.; Rogers, D.; Hursthouse, M. B. <i>Proc. R. Soc. London, Ser. A</i> <b>1978</b> , <i>359</i> , 365. (C <sub>21</sub> H <sub>43</sub> N <sub>8</sub> O <sub>12</sub> ) <sub>2</sub> (SeO <sub>4</sub> ) <sub>3</sub> ·8H <sub>2</sub> O                                         |
| 419775        | 1.617 Å | Grzechnik, A.; Breczewski, T.; Friese, K. <i>J. Solid State Chem.</i> <b>2008</b> , <i>181</i> , 2914-2917. Tl <sub>2</sub> SeO <sub>4</sub>                                                                                                                                             |
| 99382         | 1.618 Å | Friese, K.; Goeta, A. E.; Leech, M. A.; Howard, J. A. K.; Madariaga, G.; Perez-Mato, J. M.; Breczewski, T. <i>J. Solid State Chem.</i> <b>2004</b> , <i>177</i> , 1127-1136. Tl <sub>2</sub> SeO <sub>4</sub>                                                                            |
| KERRIK02      | 1.618 Å | Kessentini, Y.; Ben Ahmed, A.; Al-Juaid, S. S.; Elaoud, Z. <i>J. Solid State Chem.</i> <b>2022</b> , <i>313</i> , 123286. (C <sub>12</sub> H <sub>18</sub> N) <sub>2</sub> SeO <sub>4</sub> ·H <sub>2</sub> O                                                                            |
| 21047         | 1.620 Å | Kruglik, A. I.; Simonov, V. I.; Yuzvak, V. I. <i>Kristallografiya</i> <b>1973</b> , <i>18N</i> , 287-292. (NH <sub>4</sub> )NaSeO <sub>4</sub> ·2H <sub>2</sub> O                                                                                                                        |
| 157371        | 1.620 Å | Dammak, M.; Litaïem, H.; Gravereau, P.; Mhiri, T.; Kolsi, A. W. <i>J. Alloys Compd.</i> <b>2007</b> , <i>442</i> , 316-319. Rb <sub>2</sub> SeO <sub>4</sub> ·Te(OH) <sub>6</sub>                                                                                                        |
| 419338        | 1.621 Å | Ghedia, S.; Dinnebier, R.; Jansen, M. <i>Solid State Sci.</i> <b>2009</b> , <i>11</i> , 72-76. Rb <sub>2</sub> SeO <sub>4</sub>                                                                                                                                                          |
| KERRIK        | 1.621 Å | Kessentini, Y.; Ahmed, A. B.; Elaoud, Z.; Aljuaid, S. S.; Mhiri, T. <i>Spectrochim. Acta, Sect. A</i> <b>2012</b> , <i>98</i> , 222. (C <sub>12</sub> H <sub>18</sub> N) <sub>2</sub> SeO <sub>4</sub> ·H <sub>2</sub> O                                                                 |
| 14298         | 1.622 Å | Kalman, A.; Stephens, J. S.; Cruickshank, D. W. J. <i>Acta Crystallogr., Sect. B</i> <b>1970</b> , <i>26</i> , 1451-1454. K <sub>2</sub> SeO <sub>4</sub>                                                                                                                                |
| 107620        | 1.622 Å | Malchus, M.; Jansen, M. <i>Z. Naturforsch., Teil B</i> <b>1998</b> , <i>53</i> , 704-710. (N(CH <sub>3</sub> ) <sub>4</sub> ) <sub>2</sub> SeO <sub>4</sub>                                                                                                                              |
| 200539        | 1.622 Å | Nozik, Y. Z.; Fykin, L. E.; Duderov, V. Y.; Muradyan, L. A.; Rostuntseva, A. I. <i>Kristallografiya</i> <b>1978</b> , <i>23N</i> , 617-619. Na(NH <sub>4</sub> )SeO <sub>4</sub> ·2H <sub>2</sub> O                                                                                      |
| MAKLUH        | 1.622 Å | Ayi, A. A.; Uwah, I. E.; Iniama, G. E. <i>Ultra Sci. Phys. Sci.</i> <b>2007</b> , <i>19</i> , 473. (H <sub>3</sub> N(CH <sub>2</sub> ) <sub>2</sub> (NH <sub>2</sub> (CH <sub>2</sub> ) <sub>2</sub> ) <sub>2</sub> NH <sub>3</sub> )(SeO <sub>4</sub> ) <sub>2</sub> ·4H <sub>2</sub> O |
| 73464         | 1.624 Å | Fabry, J.; Breczewski, T.; Petricek, V. <i>Acta Crystallogr., Sect. B</i> <b>1993</b> , <i>49</i> , 826-832. K <sub>3</sub> Na(SeO <sub>4</sub> ) <sub>2</sub>                                                                                                                           |
| 81688         | 1.624 Å | Gonzalez-Silgo, C.; Solans, X.; Ruiz-Perez, C.; Martinez-Sarrion, M. L.; Mestres, L. <i>Ferroelectrics</i> <b>1996</b> , <i>177</i> , 191-199. K <sub>2</sub> SeO <sub>4</sub>                                                                                                           |
| 99383         | 1.625 Å | Friese, K.; Goeta, A. E.; Leech, M. A.; Howard, J. A. K.; Madariaga, G.; Perez-Mato, J. M.; Breczewski, T. <i>J. Solid State Chem.</i> <b>2004</b> , <i>177</i> , 1127-1136. Tl <sub>2</sub> SeO <sub>4</sub>                                                                            |
| 81689         | 1.626 Å | Gonzalez-Silgo, C.; Solans, X.; Ruiz-Perez, C.; Martinez-Sarrion, M. L.; Mestres, L. <i>Ferroelectrics</i> <b>1996</b> , <i>177</i> , 191-199. K <sub>2</sub> SeO <sub>4</sub>                                                                                                           |
| 81690         | 1.626 Å | Gonzalez-Silgo, C.; Solans, X.; Ruiz-Perez, C.; Martinez-Sarrion, M. L.; Mestres, L. <i>Ferroelectrics</i> <b>1996</b> , <i>177</i> , 191-199. K <sub>2</sub> SeO <sub>4</sub>                                                                                                           |



|          |         |                                                                                                                                                                                                                                                                                  |
|----------|---------|----------------------------------------------------------------------------------------------------------------------------------------------------------------------------------------------------------------------------------------------------------------------------------|
| DUKLUS   | 1.626 Å | Thomas, S. P.; Veccham, S. P. K. P.; Farrugia, L. J.; Guru Row, T. N. <i>Cryst. Growth Des.</i> <b>2015</b> , <i>15</i> , 2110. (C <sub>9</sub> H <sub>11</sub> N <sub>4</sub> O <sub>2</sub> S <sub>2</sub> ) <sub>2</sub> SeO <sub>4</sub>                                     |
| LORYAT   | 1.626 Å | Janczak, J.; J.Perpetuo, G. <i>Acta Crystallogr., Sect. C</i> <b>2009</b> , <i>65</i> , o121. (H <sub>3</sub> NC <sub>6</sub> H <sub>4</sub> OH) <sub>2</sub> SeO <sub>4</sub> ·2H <sub>2</sub> O                                                                                |
| WOKSOG   | 1.626 Å | Ben Hassen, C.; Boujelbene, M.; Bahri, M.; Zouari, N.; Mhiri, T. <i>J. Mol. Struct.</i> <b>2014</b> , <i>1074</i> , 602. (C <sub>7</sub> H <sub>10</sub> N) <sub>2</sub> SeO <sub>4</sub>                                                                                        |
| 54168    | 1.627 Å | Fukami, T.; Chen, R.-H. <i>Acta Phys. Pol., Ser. A</i> <b>1998</b> , <i>94</i> , 795-801. K <sub>3</sub> Na(SeO <sub>4</sub> ) <sub>2</sub>                                                                                                                                      |
| WULSAY01 | 1.627 Å | Zhang, W.; Chen, L.-Z.; Xiong, R.-G.; Nakamura, T.; Huang, S. D. <i>J. Am. Chem. Soc.</i> <b>2009</b> , <i>131</i> , 12544. [Cu(H <sub>2</sub> O) <sub>6</sub> ](C <sub>6</sub> H <sub>14</sub> N <sub>2</sub> )(SeO <sub>4</sub> ) <sub>2</sub>                                 |
| 158790   | 1.628 Å | Krivovichev, S. V. <i>Ukrain. Dokl. Kristallogr.</i> <b>2006</b> , <i>135</i> , 106-113. [Al(H <sub>2</sub> O) <sub>6</sub> ] <sub>2</sub> (SeO <sub>4</sub> ) <sub>3</sub> (NO <sub>3</sub> )·4H <sub>2</sub> O                                                                 |
| 250316   | 1.628 Å | Krivovichev, S. V. <i>Zapiski Vserossijskogo Mineralogicheskogo Obshchestva</i> <b>2006</b> , <i>135</i> , 106-113. [Al(H <sub>2</sub> O) <sub>6</sub> ] <sub>2</sub> (SeO <sub>4</sub> ) <sub>3</sub> ·4H <sub>2</sub> O                                                        |
| 419776   | 1.628 Å | Grzechnik, A.; Breczewski, T.; Friese, K. <i>J. Solid State Chem.</i> <b>2008</b> , <i>181</i> , 2914-2917. Tl <sub>2</sub> SeO <sub>4</sub>                                                                                                                                     |
| JUFKIUS  | 1.628 Å | Mottillo, C.; Friscic, T. <i>Chem. Commun.</i> <b>2015</b> , <i>51</i> , 8924. (C <sub>13</sub> H <sub>11</sub> N <sub>2</sub> ) <sub>2</sub> SeO <sub>4</sub>                                                                                                                   |
| JEMYIM   | 1.629 Å | Naili, N.; Francois, M.; Norquist, A. J.; Rekik, W. <i>Solid State Sci.</i> <b>2017</b> , <i>74</i> , 44. [Mn(H <sub>2</sub> O) <sub>6</sub> ] <sub>2</sub> C <sub>6</sub> H <sub>14</sub> N <sub>2</sub> (SeO <sub>4</sub> ) <sub>2</sub>                                       |
| 81691    | 1.630 Å | Gonzalez-Silgo, C.; Solans, X.; Ruiz-Perez, C.; Martinez-Sarrion, M. L.; Mestres, L. <i>Ferroelectrics</i> <b>1996</b> , <i>177</i> , 191-199. K <sub>2</sub> SeO <sub>4</sub>                                                                                                   |
| 94517    | 1.630 Å | Trojanov, S. I.; Kosterina, E. V.; Kemnitz, E. <i>Zh. Neorg. Khim.</i> <b>2001</b> , <i>46</i> , 1496-1502. Cs <sub>4</sub> (SeO <sub>4</sub> )(HSeO <sub>4</sub> ) <sub>2</sub> ·HF                                                                                             |
| 160681   | 1.630 Å | Smirnov, L. S.; Melnyk, G.; Zink, N.; Wozniak, K.; Dominiak, P.; Pawlukojs, A.; Loose, A.; Shuvalov, L. A. <i>Poverkhnostnye Fizika, Khimiya, Mekhanika</i> <b>2007</b> , <i>73-79</i> . (NH <sub>4</sub> ) <sub>2</sub> (SeO <sub>4</sub> ) <sub>2</sub>                        |
| 281276   | 1.630 Å | Johnston, M. G.; Harrison, W. T. A. <i>Acta Crystallogr., Sect. E</i> <b>2003</b> , <i>59</i> , i25-i27. Li <sub>2</sub> SeO <sub>4</sub> ·H <sub>2</sub> O                                                                                                                      |
| 710013   | 1.630 Å | Euler, H.; Barbier, B.; Meents, A.; Kirfel, A. <i>Z. Kristallogr. - New Crystal Struct.</i> <b>2009</b> , <i>224</i> , 360-364. Tl <sub>2</sub> [Zn(H <sub>2</sub> O) <sub>6</sub> ](SeO <sub>4</sub> ) <sub>2</sub>                                                             |
| HILPAT   | 1.630 Å | Malchus, M.; Jansen, M. <i>Naturforsch., Sect B</i> <b>1998</b> , <i>53</i> , 704. ((CH <sub>3</sub> ) <sub>4</sub> N) <sub>2</sub> SeO <sub>4</sub>                                                                                                                             |
| RUXWIQ   | 1.630 Å | Nemec, I.; Gyepes, R.; Micka, Z.; Trojanek, F. <i>Mat. Res. Soc. Symp. Proc.</i> <b>2002</b> , <i>725</i> , 213. (C <sub>5</sub> H <sub>12</sub> NO <sub>2</sub> ) <sub>2</sub> SeO <sub>4</sub> ·2H <sub>2</sub> O. K. Marchewka, J. Janczak, S. Debrus, J. Baran, H. Ratajczak |
| 60928    | 1.631 Å | Takahashi, I.; Onodera, A.; Shiozaki, Y. <i>Acta Crystallogr., Sect. C</i> <b>1987</b> , <i>43</i> , 179-182. Rb <sub>2</sub> SeO <sub>4</sub>                                                                                                                                   |
| 73463    | 1.631 Å | Fabry, J.; Breczewski, T.; Petricek, V. <i>Acta Crystallogr., Sect. B</i> <b>1993</b> , <i>49</i> , 826-832. K <sub>3</sub> Na(SeO <sub>4</sub> ) <sub>2</sub>                                                                                                                   |
| 150083   | 1.631 Å | Wildner, M.; Stoilova, D.; Georgiev, M.; Karadjova, V. <i>J. Mol. Struct.</i> <b>2004</b> , <i>707</i> , 123-130. [Be(H <sub>2</sub> O) <sub>4</sub> ] <sub>2</sub> SeO <sub>4</sub>                                                                                             |
| 710012   | 1.631 Å | Euler, H.; Barbier, B.; Meents, A.; Kirfel, A. <i>Z. Kristallogr. - New Crystal Struct.</i> <b>2009</b> , <i>224</i> , 360-364. Tl <sub>2</sub> [Ni(H <sub>2</sub> O) <sub>6</sub> ](SeO <sub>4</sub> ) <sub>2</sub>                                                             |

|                           |                               |                                                                                                                                                                                                                                                                                                                                                                                                                                                                                                                                                                      |
|---------------------------|-------------------------------|----------------------------------------------------------------------------------------------------------------------------------------------------------------------------------------------------------------------------------------------------------------------------------------------------------------------------------------------------------------------------------------------------------------------------------------------------------------------------------------------------------------------------------------------------------------------|
| PRACSE10<br>27656         | 1.631 Å<br>1.632 Å            | Morosin, B.; Howatson, J. <i>Acta Crystallogr., Sect. B</i> <b>1970</b> , <i>26</i> , 2062. [Cu(H <sub>2</sub> N(CH <sub>2</sub> )NH <sub>2</sub> ) <sub>2</sub> ]SeO <sub>4</sub> ·H <sub>2</sub> O<br>Mehrotra, B. N.; Hahn, T.; Eysel, W.; Roepke, H.; Illguth, A. <i>Neues Jahrbuch fuer Mineralogie. Monatshefte</i> <b>1978</b> , 408-421. Na <sub>2</sub> SeO <sub>4</sub>                                                                                                                                                                                    |
| 61183<br>158480<br>200912 | 1.632 Å<br>1.632 Å<br>1.632 Å | Kruglik, A. I. <i>Dokl. Akad. Nauk SSSR</i> <b>1976</b> , <i>229</i> , 853-855. Na(NH <sub>4</sub> )(SeO <sub>4</sub> ) <sub>2</sub> ·2H <sub>2</sub> O<br>Krivovichev, S. V. <i>Ukrain. Dokl. Kristallogr.</i> <b>2006</b> , <i>135</i> , 80-87. [Mg(H <sub>2</sub> O) <sub>4</sub> ] <sub>2</sub> (SeO <sub>4</sub> ) <sub>2</sub> ·H <sub>2</sub> O<br>Mukhtarova, N. N.; Rastsvetaeva, R. K.; Ilyukhin, V. V.; Belov, N. V. <i>Kristallografiya</i> <b>1979</b> , <i>24N</i> , 1184-1192. Na[In(H <sub>2</sub> O) <sub>6</sub> ](SeO <sub>4</sub> ) <sub>2</sub> |
| 250370                    | 1.632 Å                       | Krivovichev, S. V. <i>Zapiski Vserossijskogo Mineralogicheskogo Obshchestva</i> <b>2006</b> , 80-87. [Mg(H <sub>2</sub> O) <sub>4</sub> ] <sub>2</sub> (SeO <sub>4</sub> ) <sub>2</sub> ·H <sub>2</sub> O                                                                                                                                                                                                                                                                                                                                                            |
| 710008                    | 1.632 Å                       | Euler, H.; Barbier, B.; Meents, A.; Kirfel, A. Z. <i>Kristallogr. - New Crystal Struct.</i> <b>2009</b> , <i>224</i> , 360-364. Tl <sub>2</sub> [Mg(H <sub>2</sub> O) <sub>6</sub> ](SeO <sub>4</sub> ) <sub>2</sub>                                                                                                                                                                                                                                                                                                                                                 |
| RANYEK                    | 1.632 Å                       | Havlicek, D.; Plocek, J.; Nemeč, I.; Gyepes, R.; Micka, Z. <i>J. Solid State Chem.</i> <b>2000</b> , <i>150</i> , 305. (C <sub>6</sub> H <sub>16</sub> N <sub>2</sub> )SeO <sub>4</sub> ·2H <sub>2</sub> O                                                                                                                                                                                                                                                                                                                                                           |
| WUYXIX                    | 1.632 Å                       | Marchewka, M. K.; Janczak, J.; Debrus, S.; Baran, J.; Ratajczak, H. <i>Solid State Sci.</i> <b>2003</b> , <i>5</i> , 643. (C <sub>3</sub> H <sub>7</sub> N <sub>6</sub> ) <sub>4</sub> (SeO <sub>4</sub> ) <sub>2</sub> ·3H <sub>2</sub> O                                                                                                                                                                                                                                                                                                                           |
| OWOROI                    | 1.632 Å                       | Liao, J.-H.; Chang, H.-W.; You, H.-C.; Fang, C.-S.; Liu, C. W. <i>Inorg. Chem.</i> <b>2011</b> , <i>50</i> , 2070. [Ag <sub>32</sub> C <sub>96</sub> H <sub>240</sub> O <sub>48</sub> P <sub>24</sub> S <sub>48</sub> ](SeO <sub>4</sub> ) <sub>2</sub> (PF <sub>6</sub> ) <sub>4</sub>                                                                                                                                                                                                                                                                              |
| 82757                     | 1.633 Å                       | Micka, Z.; Prokopova, L.; Cisarova, I.; Havlicek, D. <i>Coll. Czech. Chem. Commun.</i> <b>1996</b> , <i>61</i> , 1295-1306. Rb <sub>2</sub> [Mg(H <sub>2</sub> O) <sub>6</sub> ](SeO <sub>4</sub> ) <sub>2</sub>                                                                                                                                                                                                                                                                                                                                                     |
| 174115                    | 1.633 Å                       | Sawae, S.; Nakashima, T.; Shigematsu, H.; Kasano, H.; Mashiyama, H. <i>J. Phys. Soc. Jpn.</i> <b>2005</b> , <i>74</i> , 2748-2753. (K <sub>0.52</sub> Rb <sub>0.48</sub> ) <sub>2</sub> SeO <sub>4</sub>                                                                                                                                                                                                                                                                                                                                                             |
| 240671<br>710009          | 1.633 Å<br>1.633 Å            | Ling, J.; Albrecht-Schmitt, T. E. <i>Inorg. Chem.</i> <b>2007</b> , <i>46</i> , 346-347. K <sub>2</sub> SeO <sub>4</sub> ·2HIO <sub>3</sub><br>Euler, H.; Barbier, B.; Meents, A.; Kirfel, A. Z. <i>Kristallogr. - New Crystal Struct.</i> <b>2009</b> , <i>224</i> , 360-364. Tl <sub>2</sub> [Co(H <sub>2</sub> O) <sub>6</sub> ](SeO <sub>4</sub> ) <sub>2</sub>                                                                                                                                                                                                  |
| JUFLAZ<br>RANYAG          | 1.641 Å<br>1.633 Å            | Mottillo, C.; Friscic, T. <i>Chem. Commun.</i> <b>2015</b> , <i>51</i> , 8924. (C <sub>13</sub> H <sub>11</sub> N <sub>2</sub> ) <sub>2</sub> SeO <sub>4</sub> ·2CH <sub>3</sub> OH<br>Havlicek, D.; Plocek, J.; Nemeč, I.; Gyepes, R.; Micka, Z. <i>J. Solid State Chem.</i> <b>2000</b> , <i>150</i> , 305. (C <sub>4</sub> H <sub>12</sub> N <sub>2</sub> )SeO <sub>4</sub> ·H <sub>2</sub> O                                                                                                                                                                     |
| 82756                     | 1.634 Å                       | Micka, Z.; Prokopova, L.; Cisarova, I.; Havlicek, D. <i>Coll. Czech. Chem. Commun.</i> <b>1996</b> , <i>61</i> , 1295-1306. K <sub>2</sub> [Mg(H <sub>2</sub> O) <sub>6</sub> ](SeO <sub>4</sub> ) <sub>2</sub>                                                                                                                                                                                                                                                                                                                                                      |
| 152720                    | 1.634 Å                       | Litaiem, H.; Dammak, M.; Mhiri, T.; Cousson, A. <i>J. Alloys Compd.</i> <b>2005</b> , <i>396</i> , 34-39. (NH <sub>4</sub> ) <sub>2</sub> SeO <sub>4</sub> ·Te(OH) <sub>6</sub>                                                                                                                                                                                                                                                                                                                                                                                      |
| 158479                    | 1.634 Å                       | Krivovichev, S. V. <i>Ukrain. Dokl. Kristallogr.</i> <b>2006</b> , <i>135</i> , 96-101. [Al(H <sub>2</sub> O) <sub>6</sub> ](SeO <sub>4</sub> )(NO <sub>3</sub> )·H <sub>2</sub> O                                                                                                                                                                                                                                                                                                                                                                                   |

|        |         |                                                                                                                                                                                                                                                                            |
|--------|---------|----------------------------------------------------------------------------------------------------------------------------------------------------------------------------------------------------------------------------------------------------------------------------|
| 250369 | 1.634 Å | Krivovichev, S. V. <i>Zapiski Vserossijskogo Mineralogicheskogo Obshchestva</i> <b>2006</b> , 96-101. [Al(H <sub>2</sub> O) <sub>6</sub> ] <sub>2</sub> (SeO <sub>4</sub> )(NO <sub>3</sub> )·H <sub>2</sub> O                                                             |
| 710010 | 1.634 Å | Euler, H.; Barbier, B.; Meents, A.; Kirfel, A. <i>Z. Kristallogr. - New Crystal Struct.</i> <b>2009</b> , 224, 360-364. Tl <sub>2</sub> [Cu(H <sub>2</sub> O) <sub>6</sub> ](SeO <sub>4</sub> ) <sub>2</sub>                                                               |
| 710011 | 1.634 Å | Euler, H.; Barbier, B.; Meents, A.; Kirfel, A. <i>Z. Kristallogr. - New Crystal Struct.</i> <b>2009</b> , 224, 360-364. Tl <sub>2</sub> [Mn(H <sub>2</sub> O) <sub>6</sub> ](SeO <sub>4</sub> ) <sub>2</sub>                                                               |
| ISOMOT | 1.634 Å | Matulkova, I.; Cihelka, J.; Fejfarova, K.; Dusek, M.; Pojarova, M.; Vanek, P.; Kroupa, J.; Sala, M.; Krupkova, R.; Nemeč, I. <i>CrystEngComm</i> <b>2011</b> , 13, 4131. (C <sub>6</sub> H <sub>5</sub> NH <sub>3</sub> ) <sub>2</sub> SeO <sub>4</sub> ·2H <sub>2</sub> O |
| 51079  | 1.635 Å | Trojanov, S. I.; Morozov, I. V.; Rybakov, V. B.; Stiewe, A.; Kemnitz, E. <i>J. Solid State Chem.</i> <b>1998</b> , 141, 317-322. Cs <sub>4</sub> (SeO <sub>4</sub> )(HSeO <sub>4</sub> ) <sub>2</sub> ·H <sub>3</sub> PO <sub>4</sub>                                      |
| 67234  | 1.635 Å | Pietraszko, A.; Lukaszewicz, K.; Augustyniak, M. A. <i>Acta Crystallogr., Sect. C</i> <b>1992</b> , 48, 2069-2071. Li <sub>2</sub> SeO <sub>4</sub>                                                                                                                        |
| 71786  | 1.635 Å | Baran, J.; Lis, T.; Marchewka, M.; Ratajczak, H. <i>J. Mol. Struct.</i> <b>1991</b> , 250, 13-45. Na <sub>4</sub> (SeO <sub>4</sub> )(SeO <sub>3</sub> )·H <sub>2</sub> O                                                                                                  |
| 82758  | 1.635 Å | Micka, Z.; Prokopova, L.; Cisarova, I.; Havlicek, D. <i>Coll. Czech. Chem. Commun.</i> <b>1996</b> , 61, 1295-1306. Cs <sub>2</sub> [Mg(H <sub>2</sub> O) <sub>6</sub> ](SeO <sub>4</sub> ) <sub>2</sub>                                                                   |
| 82759  | 1.635 Å | Micka, Z.; Prokopova, L.; Cisarova, I.; Havlicek, D. <i>Coll. Czech. Chem. Commun.</i> <b>1996</b> , 61, 1295-1306. (NH <sub>4</sub> ) <sub>2</sub> [Mg(H <sub>2</sub> O) <sub>6</sub> ](SeO <sub>4</sub> ) <sub>2</sub>                                                   |
| 250994 | 1.635 Å | Simmons, C. J.; Stratemeier, H.; Hitchman, M. A.; Riley, M. J. <i>Inorg. Chem.</i> <b>2013</b> , 52, 10481. K <sub>2</sub> [Cu(H <sub>2</sub> O) <sub>6</sub> ](SeO <sub>4</sub> ) <sub>2</sub>                                                                            |
| 409719 | 1.635 Å | Euler, H.; Meents, A.; Barbier, B.; Kirfel, A. <i>Z. Kristallogr. - New Cryst. Struct.</i> <b>2003</b> , 218, 265-268. Rb <sub>2</sub> [Mg(H <sub>2</sub> O) <sub>6</sub> ](SeO <sub>4</sub> ) <sub>2</sub>                                                                |
| 409750 | 1.635 Å | Euler, H.; Barbier, B.; Meents, A.; Kirfel, A. <i>Z. Kristallogr. - New Cryst. Struct.</i> <b>2003</b> , 218, 405-408. Rb <sub>2</sub> [Zn(H <sub>2</sub> O) <sub>6</sub> ](SeO <sub>4</sub> ) <sub>2</sub>                                                                |
| 411002 | 1.635 Å | Trojanov, S. I.; Morozov, I. V.; Rybakov, V. B.; Kemnitz, E. <i>Kristallografiya</i> <b>2000</b> , 45, 441-447. Rb <sub>2</sub> SeO <sub>4</sub> ·H <sub>3</sub> PO <sub>4</sub>                                                                                           |
| ISOMUZ | 1.635 Å | Matulkova, I.; Cihelka, J.; Fejfarova, K.; Dusek, M.; Pojarova, M.; Vanek, P.; Kroupa, J.; Sala, M.; Krupkova, R.; Nemeč, I. <i>CrystEngComm</i> <b>2011</b> , 13, 4131. (C <sub>6</sub> H <sub>5</sub> NH <sub>3</sub> ) <sub>2</sub> SeO <sub>4</sub>                    |
| JUFKOM | 1.635 Å | Mottillo, C.; Friscic, T. <i>Chem. Commun.</i> <b>2015</b> , 51, 8924. (C <sub>8</sub> H <sub>9</sub> N <sub>2</sub> ) <sub>2</sub> SeO <sub>4</sub> ·CH <sub>3</sub> OH·0.5H <sub>2</sub> O                                                                               |
| ROPMIU | 1.635 Å | Ben Hassen, C.; Boujelbene, M.; Mhiri, T. <i>J. Mol. Struct.</i> <b>2015</b> , 1079, 147. (C <sub>3</sub> H <sub>6</sub> N <sub>5</sub> ) <sub>2</sub> SeO <sub>4</sub> ·2H <sub>2</sub> O                                                                                 |
| 66526  | 1.636 Å | Zuniga, F. J.; Breczewski, T.; Arnaiz, A. <i>Acta Crystallogr., Sect. C</i> <b>1991</b> , 47, 638-640. Cs <sub>2</sub> SeO                                                                                                                                                 |
| 193627 | 1.636 Å | Pristacz, H.; Talla, D.; Preuschl, F.; Giester, G.; Wildner, M. <i>Neues Jahrbuch fuer Mineralogie, Abhandlungen</i> <b>2014</b> , 191, 215. Ca(SeO <sub>4</sub> ) <sub>2</sub>                                                                                            |

|        |         |                                                                                                                                                                                                                                                                 |
|--------|---------|-----------------------------------------------------------------------------------------------------------------------------------------------------------------------------------------------------------------------------------------------------------------|
| 409722 | 1.636 Å | Euler, H.; Meents, A.; Barbier, B.; Kirfel, A. <i>Z. Kristallogr. - New Cryst. Struct.</i> <b>2003</b> , <i>218</i> , 265-268. Rb <sub>2</sub> [Zn(H <sub>2</sub> O) <sub>6</sub> ](SeO <sub>4</sub> ) <sub>2</sub>                                             |
| 409747 | 1.636 Å | Euler, H.; Barbier, B.; Meents, A.; Kirfel, A. <i>Z. Kristallogr. - New Cryst. Struct.</i> <b>2003</b> , <i>218</i> , 405-408. Rb <sub>2</sub> [Mn(H <sub>2</sub> O) <sub>6</sub> ](SeO <sub>4</sub> ) <sub>2</sub>                                             |
| 409748 | 1.636 Å | Euler, H.; Barbier, B.; Meents, A.; Kirfel, A. <i>Z. Kristallogr. - New Cryst. Struct.</i> <b>2003</b> , <i>218</i> , 405-408. Rb <sub>2</sub> [Co(H <sub>2</sub> O) <sub>6</sub> ](SeO <sub>4</sub> ) <sub>2</sub>                                             |
| MARFEU | 1.636 Å | Nkhili, N. L.; Rekik, W.; Naili, H.; Mhiri, T.; Bataille, T. <i>Arab J. Chem.</i> <b>2017</b> , <i>10</i> , S2509. [Ni(H <sub>2</sub> O) <sub>6</sub> ](C <sub>6</sub> H <sub>14</sub> N <sub>2</sub> )(SeO <sub>4</sub> ) <sub>2</sub>                         |
| IKUWIX | 1.636 Å | Ayadi, R.; Lhoste, J.; Rak, I. L.; Mhiri, T.; Boujelbene, M. <i>J. Saudi Chem. Soc.</i> <b>2017</b> , <i>21</i> , 869. (H <sub>3</sub> N(CH <sub>2</sub> ) <sub>3</sub> NH <sub>3</sub> ) <sub>2</sub> (SeO <sub>3</sub> )(SeO <sub>4</sub> )·4H <sub>2</sub> O |
| RAFWII | 1.636 Å | Messoudi, N.; Messoudi, N.; Elleuch, S.; Jarraya, K. <i>Zh. Strukt. Khim.</i> <b>2021</b> , <i>62</i> , 1293. (C <sub>3</sub> H <sub>8</sub> N <sub>6</sub> )SeO <sub>4</sub>                                                                                   |
| TISWOL | 1.636 Å | Panicker, L. <i>J. Mol. Struct.</i> <b>2024</b> , <i>1296</i> , 136764. ( <i>p</i> -H <sub>3</sub> NC <sub>6</sub> H <sub>4</sub> COOH) <sub>2</sub> SeO <sub>4</sub> ·3H <sub>2</sub> O                                                                        |
| TISWUR | 1.636 Å | Panicker, L. <i>J. Mol. Struct.</i> <b>2024</b> , <i>1296</i> , 136764. ( <i>p</i> -H <sub>3</sub> NC <sub>6</sub> H <sub>4</sub> COOH) <sub>2</sub> SeO <sub>4</sub>                                                                                           |
| 171281 | 1.637 Å | Simmons, C. J.; Stratemeier, H.; Hitchman, M. A.; Riley, M. J. <i>Inorg. Chem.</i> <b>2006</b> , <i>45</i> , 1021-1031. K <sub>2</sub> [Cu(H <sub>2</sub> O) <sub>6</sub> ](SeO <sub>4</sub> ) <sub>2</sub>                                                     |
| 171282 | 1.637 Å | Simmons, C. J.; Stratemeier, H.; Hitchman, M. A.; Riley, M. J. <i>Inorg. Chem.</i> <b>2006</b> , <i>45</i> , 1021-1031. K <sub>2</sub> [Cu(H <sub>2</sub> O) <sub>6</sub> ](SeO <sub>4</sub> ) <sub>2</sub>                                                     |
| 246302 | 1.637 Å | Pertlik, F.; Fuith, A. H. <i>Acta Crystallogr., Sect. C</i> <b>1989</b> , <i>45</i> , 158-159. Li <sub>2</sub> SeO <sub>4</sub>                                                                                                                                 |
| 409591 | 1.637 Å | Fleck, M.; Kolitsch, U. <i>Z. Kristallogr. - New Cryst. Struct.</i> <b>2002</b> , <i>217</i> , 15-16. Rb <sub>2</sub> [Ni(H <sub>2</sub> O) <sub>6</sub> ](SeO <sub>4</sub> ) <sub>2</sub>                                                                      |
| 409591 | 1.637 Å | Fleck, M.; Kolitsch, U. <i>Z. Kristallogr. - New Cryst. Struct.</i> <b>2002</b> , <i>217</i> , 15-16. Rb <sub>2</sub> [Cu(H <sub>2</sub> O) <sub>6</sub> ](SeO <sub>4</sub> ) <sub>2</sub>                                                                      |
| 409669 | 1.637 Å | Euler, H.; Meents, A.; Barbier, B.; Kirfel, A. <i>Z. Kristallogr. - New Cryst. Struct.</i> <b>2003</b> , <i>218</i> , 9-10. [Mn(H <sub>2</sub> O) <sub>4</sub> ]SeO <sub>4</sub> ·H <sub>2</sub> O                                                              |
| 409720 | 1.637 Å | Euler, H.; Meents, A.; Barbier, B.; Kirfel, A. <i>Z. Kristallogr. - New Cryst. Struct.</i> <b>2003</b> , <i>218</i> , 265-268. Rb <sub>2</sub> [Co(H <sub>2</sub> O) <sub>6</sub> ](SeO <sub>4</sub> ) <sub>2</sub>                                             |
| 409749 | 1.637 Å | Euler, H.; Barbier, B.; Meents, A.; Kirfel, A. <i>Z. Kristallogr. - New Cryst. Struct.</i> <b>2003</b> , <i>218</i> , 405-408. Rb <sub>2</sub> [Ni(H <sub>2</sub> O) <sub>6</sub> ](SeO <sub>4</sub> ) <sub>2</sub>                                             |
| FAKVEU | 1.637 Å | Kammoun, O.; Loulou, N.; Rekik, W.; Naili, H.; Mhiri, T.; Bataille, T. <i>J. Chem. Cryst.</i> <b>2012</b> , <i>42</i> , 103. [Co(H <sub>2</sub> O) <sub>6</sub> ](C <sub>6</sub> H <sub>14</sub> N <sub>2</sub> )(SeO <sub>4</sub> ) <sub>2</sub>               |
| HIZVIZ | 1.637 Å | Einkauf, J. D.; Williams, N. J.; Seipp, C. A.; Custelcean, R. <i>JACS Au</i> <b>2023</b> , <i>3</i> , 879. (C <sub>9</sub> H <sub>15</sub> N <sub>8</sub> )SeO <sub>4</sub> ·4H <sub>2</sub> O                                                                  |
| NENHOF | 1.637 Å | Daszkiewicz, M. <i>Struct. Chem.</i> <b>2012</b> , <i>23</i> , 307. (C <sub>4</sub> H <sub>6</sub> N <sub>3</sub> ) <sub>2</sub> SeO <sub>4</sub> ·H <sub>2</sub> O                                                                                             |
| QIXPES | 1.637 Å | Maubert, B. M.; Nelson, J.; McKee, V.; Town, R. M.; Pal, I. <i>J. Chem. Soc., Dalton Trans.</i> <b>2001</b> , 1395. (C <sub>36</sub> H <sub>60</sub> N <sub>8</sub> )SeO <sub>4</sub> (ClO <sub>4</sub> ) <sub>4</sub> ·H <sub>2</sub> O                        |

|        |         |                                                                                                                                                                   |
|--------|---------|-------------------------------------------------------------------------------------------------------------------------------------------------------------------|
| QOFSAI | 1.637 Å | Diallo, W.; Diop, L.; Diop, C. A. K.; Plasseraud, L.; Cattey, H. <i>Z. Naturforsch., Sect. B</i> <b>2017</b> , <i>72</i> , 425. $(N(i-C_3H_7)_2)_2SeO_4$          |
| 89440  | 1.638 Å | Pietraszko, A.; Bronowska, W. <i>Solid State Commun.</i> <b>1999</b> , <i>111</i> , 205-209. $Rb_2Li_4(SeO_4)_3 \cdot 2H_2O$                                      |
| 150084 | 1.638 Å | Wildner, M.; Stoilova, D.; Georgiev, M.; Karadjova, V. <i>J. Mol. Struct.</i> <b>2004</b> , <i>707</i> , 123-130. $[Be(H_2O)_4]SeO_4$                             |
| 150706 | 1.638 Å | Fukami, T.; Chen Rueyhong <i>J. Phys. Soc. Jpn.</i> <b>2003</b> , <i>72</i> , 3299-3300. $Na_2SeO_4$                                                              |
| 171280 | 1.638 Å | Simmons, C. J.; Stratemeier, H.; Hitchman, M. A.; Riley, M. J. <i>Inorg. Chem.</i> <b>2006</b> , <i>45</i> , 1021-1031. $K_2[Cu(H_2O)_6](SeO_4)_2$                |
| 242241 | 1.638 Å | Kamburov, S.; Schmidt, H.; Voigt, W.; Balarew, C. <i>Acta Crystallogr., Sect. B</i> <b>2014</b> , <i>70</i> , 714. $Na_2SeO_4 \cdot 10H_2O$                       |
| 409648 | 1.638 Å | Fleck, M.; Kolitsch, U. <i>Z. Kristallogr. - New Cryst. Struct.</i> <b>2002</b> , <i>217</i> , 471-473. $(NH_4)_2[Co(H_2O)_6](SeO_4)_2$                           |
| 409721 | 1.638 Å | Euler, H.; Meents, A.; Barbier, B.; Kirfel, A. <i>Z. Kristallogr. - New Cryst. Struct.</i> <b>2003</b> , <i>218</i> , 265-268. $Rb_2[Mn(H_2O)_6](SeO_4)_2$        |
| 409746 | 1.638 Å | Euler, H.; Barbier, B.; Meents, A.; Kirfel, A. <i>Z. Kristallogr. - New Cryst. Struct.</i> <b>2003</b> , <i>218</i> , 405-408. $Rb_2[Mg(H_2O)_6](SeO_4)_2$        |
| 419776 | 1.638 Å | Grzechnik, A.; Breczewski, T.; Friese, K. <i>J. Solid State Chem.</i> <b>2008</b> , <i>181</i> , 2914-2917. $Tl_2SeO_4$                                           |
| 47736  | 1.638 Å | Reuter, H.; Kamaha, S. <i>Acta Crystallogr., Sect. E</i> <b>2022</b> , <i>78</i> , 809. $Ba_3[Sn(OH)_6](SeO_4)_2 \cdot 3H_2O$                                     |
| 70988  | 1.638 Å | Yan, Q.; Dong, X.; Huang, L.; Zhou, Y.; Lin, Z.; Zou, G. <i>Inorg. Chem.</i> <b>2023</b> , <i>62</i> , 4752. $Na_3Li(SeO_4)_2 \cdot 3H_2O$                        |
| COSSAH | 1.638 Å | Messoudi, N.; Messoudi, N.; Litaïem, H.; Jarraya, K. <i>J. Mol. Struct.</i> <b>2019</b> , <i>1198</i> , 126854. $(C_5H_5NNH_3)_2SeO_4 \cdot H_2O$                 |
| PIPLAE | 1.638 Å | Boursas, F.; Berrah, F.; Kanagathara, N.; Anbalagan, G.; Bouacida, S. <i>J. Mol. Struct.</i> <b>2019</b> , <i>1180</i> , 532. $(C_3H_5N_4O_2)_2SeO_4 \cdot 2H_2O$ |
| QITYUO | 1.638 Å | Sansam, B. C. R.; Anderson, K. M.; Steed, J. W. <i>Cryst. Growth Des.</i> <b>2007</b> , <i>7</i> , 2649. $(C_{12}H_{11}N_4)_2SeO_4 \cdot 6H_2O$                   |
| ZIWSAC | 1.638 Å | Maalej, W. CCDC deposition number 1887612, <b>2018</b> . $[Ni(H_2O)_4(C_{12}H_{12}N_2)]SeO_4$                                                                     |
| 154512 | 1.639 Å | Dammak, M.; Mhiri, T.; Cousson, A. <i>J. Alloys Compd.</i> <b>2006</b> , <i>407</i> , 176-181. $K_2SeO_4 \cdot Te(OH)_6$                                          |
| 194195 | 1.639 Å | Weil, M.; Bonneau, B. <i>Acta Crystallogr., Sect. E</i> <b>2014</b> , <i>70</i> , 54. $Na_2SeO_4 \cdot 10H_2O$                                                    |
| 200156 | 1.639 Å | Mukhtarova, N. N.; Rastsvetaeva, R. K.; Ilyukhin, V. V.; Belov, N. V. <i>Dokl. Akad. Nauk SSSR</i> <b>1977</b> , <i>235</i> , 575-577. $Na[In(H_2O)_6](SeO_4)_2$  |
| 201893 | 1.639 Å | Yamada, N.; Ono, Y.; Ikeda, T. <i>J. Phys. Soc. Jpn.</i> <b>1984</b> , <i>53</i> , 2565-2574. $K_2SeO_4$                                                          |
| 280788 | 1.639 Å | Kolitsch, U. <i>Acta Crystallogr., Sect. E</i> <b>2002</b> , <i>58</i> , 3-5. $[Mg(H_2O)_6]SeO_4$                                                                 |

|        |         |                                                                                                                                                                                                                                                                                      |
|--------|---------|--------------------------------------------------------------------------------------------------------------------------------------------------------------------------------------------------------------------------------------------------------------------------------------|
| 409649 | 1.639 Å | Fleck, M.; Kolitsch, U. <i>Z. Kristallogr. - New Cryst. Struct.</i> <b>2002</b> , <i>217</i> , 471-473.<br>(NH <sub>4</sub> ) <sub>2</sub> [Zn(H <sub>2</sub> O) <sub>6</sub> ](SeO <sub>4</sub> ) <sub>2</sub>                                                                      |
| BIWZUG | 1.639 Å | Baaziz, S.; Poyraz, E. B.; Benali-Cherif, R.; Falek, W.; Hannachi, B.; Dege, N.; Bendeif, E.; Benali-Cherif, N. <i>J. Struct. Chem.</i> <b>2023</b> , <i>64</i> , 1350. (C <sub>5</sub> H <sub>6</sub> N <sub>6</sub> O) <sub>2</sub> SeO <sub>4</sub> ·2.5H <sub>2</sub> O          |
| FUQYAT | 1.639 Å | Matulkova, I.; Mathauserova, J.; Cisarova, I.; Nemecek, I.; Fabry, J. <i>J. Mol. Struct.</i> <b>2016</b> , <i>1103</i> , 82.<br>(C <sub>4</sub> H <sub>7</sub> N <sub>4</sub> ) <sub>2</sub> SeO <sub>4</sub> ·2H <sub>2</sub> O                                                     |
| KARFIU | 1.639 Å | Daszkiewicz, M.; Marchewka, M. K. <i>Vibr. Spectroscopy</i> <b>2011</b> , <i>57</i> , 326. (C <sub>5</sub> H <sub>9</sub> N <sub>2</sub> )SeO <sub>4</sub>                                                                                                                           |
| TOJYEY | 1.639 Å | Weil, M.; Bonneau, B. <i>Acta Crystallogr., Sect. E</i> <b>2014</b> , <i>70</i> , 54. [Na <sub>2</sub> (H <sub>2</sub> O) <sub>8</sub> ]SeO <sub>4</sub> ·2H <sub>2</sub> O                                                                                                          |
| 201740 | 1.640 Å | Mascherpa-Corral, D.; Ducourant, M. B.; Fourcade, R.; Mascherpa, G.; Alberola, S. <i>J. Solid State Chem.</i> <b>1986</b> , <i>63</i> , 52-61. K <sub>2</sub> SeO <sub>4</sub> ·2SbF <sub>3</sub> ·H <sub>2</sub> O                                                                  |
| 244208 | 1.640 Å | Martin, A. T.; Nichols, S. M.; Li, S.; Tan, M.; Kahr, B. <i>J. Appl. Crystallogr.</i> <b>2017</b> , <i>50</i> , 1117.<br>(C <sub>2</sub> H <sub>10</sub> N)SeO <sub>4</sub>                                                                                                          |
| GAXJAS | 1.640 Å | Matulkova, I.; Cihelka, J.; Pojarova, M.; Fejfarova, K.; Dusek, M.; Vanek, P.; Kroupa, J.; Krupkova, R.; Fabry, J.; Nemecek, I. <i>CrystEngComm</i> <b>2012</b> , <i>14</i> , 4625. (C <sub>2</sub> H <sub>6</sub> N <sub>5</sub> ) <sub>2</sub> SeO <sub>4</sub> ·2H <sub>2</sub> O |
| HIWRIS | 1.640 Å | Bhavani, R.; Kanagathara, N.; Marchewka, M. K.; Janczak, J.; Senthilkumar, K.; Azam, M. <i>Results Chem.</i> <b>2023</b> , <i>7</i> , 101239. (2-NC <sub>5</sub> H <sub>4</sub> OH) <sub>2</sub> SeO <sub>4</sub>                                                                    |
| HIZTET | 1.640 Å | Einkauf, J. D.; Williams, N. J.; Seipp, C. A.; Custelcean, R. <i>JACS Au</i> <b>2023</b> , <i>3</i> , 879.<br>(C <sub>6</sub> H <sub>16</sub> N <sub>8</sub> )SeO <sub>4</sub> ·2H <sub>2</sub> O                                                                                    |
| HIZTOD | 1.640 Å | Einkauf, J. D.; Williams, N. J.; Seipp, C. A.; Custelcean, R. <i>JACS Au</i> <b>2023</b> , <i>3</i> , 879.<br>(C <sub>10</sub> H <sub>16</sub> N <sub>8</sub> )SeO <sub>4</sub> ·2H <sub>2</sub> O                                                                                   |
| XECZUD | 1.640 Å | Martin, A. T.; Nichols, S. M.; Li, S.; Tan, M.; Kahr, B. <i>J. Appl. Crystallogr.</i> <b>2017</b> , <i>50</i> , 1117.<br>(H <sub>3</sub> N(CH <sub>2</sub> )NH <sub>3</sub> )SeO <sub>4</sub>                                                                                        |
| 60929  | 1.641 Å | Takahashi, I.; Onodera, A.; Shiozaki, Y. <i>Acta Crystallogr., Sect. C</i> <b>1987</b> , <i>43</i> , 179-182. Rb <sub>2</sub> SeO <sub>4</sub>                                                                                                                                       |
| 171279 | 1.641 Å | Simmons, C. J.; Stratemeier, H.; Hitchman, M. A.; Riley, M. J. <i>Inorg. Chem.</i> <b>2006</b> , <i>45</i> , 1021-1031.<br>K <sub>2</sub> [Cu(H <sub>2</sub> O) <sub>6</sub> ](SeO <sub>4</sub> ) <sub>2</sub>                                                                       |
| 194194 | 1.641 Å | Weil, M.; Bonneau, B. <i>Acta Crystallogr., Sect. E</i> <b>2014</b> , <i>70</i> , 54. Na <sub>2</sub> SeO <sub>4</sub> ·1.5H <sub>2</sub> O                                                                                                                                          |
| 248730 | 1.641 Å | Fortes, A. D.; Gutmann, M. J. <i>Acta Crystallogr., Sect. E</i> <b>2014</b> , <i>70</i> , 134. [Mg(H <sub>2</sub> O) <sub>6</sub> ]SeO <sub>4</sub> ·H <sub>2</sub> O                                                                                                                |
| 280783 | 1.641 Å | Kolitsch, U. <i>Acta Crystallogr., Sect. E</i> <b>2001</b> , <i>57</i> , 104-105. [Cu(H <sub>2</sub> O) <sub>4</sub> ]SeO <sub>4</sub> ·H <sub>2</sub> O                                                                                                                             |
| JUFKIG | 1.641 Å | Mottillo, C.; Friscic, T. <i>Chem. Commun.</i> <b>2015</b> , <i>51</i> , 8924. (C <sub>7</sub> H <sub>7</sub> N <sub>2</sub> ) <sub>2</sub> SeO <sub>4</sub>                                                                                                                         |
| MARFAQ | 1.641 Å | Nkhili, N. L.; Rekik, W.; Naili, H.; Mhiri, T.; Bataille, T. <i>Arab J. Chem.</i> <b>2017</b> , <i>10</i> , S2509.<br>[Zn(H <sub>2</sub> O) <sub>6</sub> ](C <sub>6</sub> H <sub>14</sub> N <sub>2</sub> )(SeO <sub>4</sub> ) <sub>2</sub>                                           |
| YOHJAI | 1.641 Å | Fortes, A. D.; Gutmann, M. J. <i>Acta Crystallogr., Sect. E</i> <b>2014</b> , <i>70</i> , 134. [Mg(H <sub>2</sub> O) <sub>6</sub> ]SeO <sub>4</sub> ·0H <sub>2</sub> O                                                                                                               |

|        |         |                                                                                                                                                                                                                                                               |
|--------|---------|---------------------------------------------------------------------------------------------------------------------------------------------------------------------------------------------------------------------------------------------------------------|
| 163455 | 1.642 Å | Amri, M.; Zouari, N.; Mhiri, T.; Gravereau, P. <i>J. Alloys Compd.</i> <b>2009</b> , <i>477</i> , 68-75.<br>Cs <sub>4</sub> (SeO <sub>4</sub> )(HSeO <sub>4</sub> ) <sub>2</sub> ·H <sub>3</sub> AsO <sub>4</sub>                                             |
| 201882 | 1.642 Å | Yamada, N.; Ikeda, T. <i>J. Phys. Soc. Jpn.</i> <b>1984</b> , <i>53</i> , 2555-2564. K <sub>2</sub> SeO <sub>4</sub>                                                                                                                                          |
| 250995 | 1.642 Å | Simmons, C. J.; Stratemeier, H.; Hitchman, M. A.; Riley, M. J. <i>Inorg. Chem.</i> <b>2013</b> , <i>52</i> , 10481.<br>Rb <sub>2</sub> [Cu(H <sub>2</sub> O) <sub>6</sub> ](SeO <sub>4</sub> ) <sub>2</sub>                                                   |
| DEHQIR | 1.642 Å | Jun-Jieh Wang; Tessier, C.; Holm, R. H. <i>Inorg. Chem.</i> <b>2006</b> , <i>45</i> , 2979. (C <sub>8</sub> H <sub>20</sub> N) <sub>2</sub> SeO <sub>4</sub> ·CH <sub>3</sub> CN                                                                              |
| GAWNAX | 1.642 Å | Divekar, S. K.; Nagabhusan Achary, S.; Ajgaonkar, V. R. <i>Solid State Sci.</i> <b>2021</b> , <i>1222</i> , 106768.<br>[Co(H <sub>2</sub> O) <sub>6</sub> ](CH <sub>3</sub> ) <sub>4</sub> N <sub>2</sub> (SeO <sub>4</sub> ) <sub>2</sub> ·4H <sub>2</sub> O |
| HIZSUI | 1.642 Å | Einkauf, J. D.; Williams, N. J.; Seipp, C. A.; Custelcean, R. <i>JACS Au</i> <b>2023</b> , <i>3</i> , 879.<br>(C <sub>5</sub> H <sub>14</sub> N <sub>8</sub> )SeO <sub>4</sub> ·3H <sub>2</sub> O                                                             |
| LOPNAH | 1.642 Å | Nkhili, N. L.; Rekik, W.; Naili, H. <i>Monatsh. Chem.</i> <b>2014</b> , <i>145</i> , 931. [Ni(H <sub>2</sub> O) <sub>6</sub> ](C <sub>4</sub> H <sub>12</sub> N <sub>2</sub> )(SeO <sub>4</sub> ) <sub>2</sub>                                                |
| HIZSES | 1.643 Å | Einkauf, J. D.; Williams, N. J.; Seipp, C. A.; Custelcean, R. <i>JACS Au</i> <b>2023</b> , <i>3</i> , 879.<br>(C <sub>4</sub> H <sub>12</sub> N <sub>8</sub> )SeO <sub>4</sub> ·3H <sub>2</sub> O                                                             |
| 838    | 1.644 Å | Carter, R.; Koerntgen, C.; Margulis, T. N. <i>Acta Crystallogr., Sect. B</i> <b>1977</b> , <i>33</i> , 592-593. (NH <sub>4</sub> ) <sub>2</sub> SeO <sub>4</sub>                                                                                              |
| 77995  | 1.644 Å | Yang, Y.-C.; Liu, X.; Zhu, C.-F.; Zhu, L.; Wu, L.-M.; Chen, L. <i>Angew. Chem., Int. Ed.</i> <b>2023</b> , <i>62</i> ,<br>e202301404. [Ag(NH <sub>3</sub> ) <sub>2</sub> ] <sub>2</sub> SeO <sub>4</sub>                                                      |
| 154671 | 1.644 Å | Dammak, M.; Litaïem, H.; Mhiri, T. <i>J. Alloys Compd.</i> <b>2006</b> , <i>416</i> , 228-235. Na <sub>2</sub> SeO <sub>4</sub> ·Te(OH) <sub>6</sub> ·0.5H <sub>2</sub> O                                                                                     |
| 171283 | 1.644 Å | Simmons, C. J.; Stratemeier, H.; Hitchman, M. A.; Riley, M. J. <i>Inorg. Chem.</i> <b>2006</b> , <i>45</i> , 1021-1031.<br>K <sub>2</sub> [Cu(H <sub>2</sub> O) <sub>6</sub> ](SeO <sub>4</sub> ) <sub>2</sub>                                                |
| 254952 | 1.644 Å | Fortes, A. D. <i>Powder Diffraction</i> <b>2015</b> , <i>30</i> , 149. [Mg(H <sub>2</sub> O) <sub>6</sub> ]SeO <sub>4</sub> ·3H <sub>2</sub> O                                                                                                                |
| 70987  | 1.645 Å | Yan, Q.; Dong, X.; Huang, L.; Zhou, Y.; Lin, Z.; Zou, G. <i>Inorg. Chem.</i> <b>2023</b> , <i>62</i> , 4752.<br>CsLi <sub>3</sub> (SeO <sub>4</sub> ) <sub>2</sub> ·H <sub>2</sub> O                                                                          |
| DGLYSE | 1.645 Å | Olejnik, S.; Lukaszewicz, K.; Lis, T. <i>Acta Crystallogr., Sect. B</i> <b>1975</b> , <i>31</i> , 1785. (C <sub>2</sub> H <sub>6</sub> NO <sub>2</sub> ) <sub>2</sub> SeO <sub>4</sub>                                                                        |
| 202659 | 1.646 Å | Mascherpa-Corral, D.; Ducourant, M. B.; Alberola, S. <i>J. Solid State Chem.</i> <b>1988</b> , <i>76</i> , 276-283.<br>K <sub>2</sub> SeO <sub>4</sub> ·2SbF <sub>3</sub> ·0.5H <sub>2</sub> O                                                                |
| LATUMS | 1.648 Å | Kono, Y.; Takeuchi, S.; Yonehara, H.; Marumo, F.; Saito, Y. <i>Acta Crystallogr., Sect. B</i> <b>1971</b> , <i>27</i> , 2341.<br>(C <sub>10</sub> H <sub>12</sub> NO)SeO <sub>4</sub>                                                                         |
| XIVZUZ | 1.648 Å | Matulkova, I.; Cihelka, J.; Pojarova, M.; Fejfarova, K.; Dusek, M.; Cisarova, I.; Vanek, P.; Kroupa, J.;<br>Nemec, P.; Tesarova, N.; Nemec, I. <i>CrystEngComm</i> <b>2014</b> , <i>16</i> , 1763.                                                            |
| 15816  | 1.649 Å | Naray-Szabo, I.; Argay, G. <i>Acta Chim. Acad. Sci. Hung.</i> <b>1963</b> , <i>39</i> , 85-92. Na <sub>2</sub> SeO <sub>4</sub>                                                                                                                               |
| TOBPAD | 1.650 Å | Soukrata, S.; Belhouchet, M.; Mhiri, T. <i>Phosphorus, Sulfur, Silicon, Relat. Elem.</i> <b>2014</b> , <i>189</i> , 422.<br>(C <sub>12</sub> H <sub>13</sub> N <sub>2</sub> O) <sub>2</sub> SeO <sub>4</sub> ·H <sub>2</sub> O                                |

|             |                               |                                                                                                                                                                                                                                                   |
|-------------|-------------------------------|---------------------------------------------------------------------------------------------------------------------------------------------------------------------------------------------------------------------------------------------------|
| 242240      | 1.651 Å                       | Kamburov, S.; Schmidt, H.; Voigt, W.; Balarew, C. <i>Acta Crystallogr., Sect. B</i> <b>2014</b> , 70, 714. Na <sub>2</sub> SeO <sub>4</sub> ·7.5H <sub>2</sub> O                                                                                  |
| 99384       | 1.653 Å                       | Friese, K.; Goeta, A. E.; Leech, M. A.; Howard, J. A. K.; Madariaga, G.; Perez-Mato, J. M.; Brecewski, T. <i>J. Solid State Chem.</i> <b>2004</b> , 177, 1127-1136. Tl <sub>2</sub> SeO <sub>4</sub>                                              |
| 16042       | 1.654 Å                       | Kalman, A.; Cruickshank, D. W. J. <i>Acta Crystallogr., Sect. B</i> <b>1970</b> , 26, 436-436. Na <sub>2</sub> SeO <sub>4</sub>                                                                                                                   |
| 138650      | 1.667 Å                       | Griesemer, S. D.; Ward, L.; Wolverton, C. <i>Phys. Rev. Mater.</i> <b>2021</b> , 5, 105003. LiRbSeO <sub>4</sub>                                                                                                                                  |
| 138676      | 1.668 Å                       | Griesemer, S. D.; Ward, L.; Wolverton, C. <i>Phys. Rev. Mater.</i> <b>2021</b> , 5, 105003. LiCsSeO <sub>4</sub>                                                                                                                                  |
| 138677      | 1.669 Å                       | Griesemer, S. D.; Ward, L.; Wolverton, C. <i>Phys. Rev. Mater.</i> <b>2021</b> , 5, 105003. LiRbSeO <sub>4</sub>                                                                                                                                  |
| 138653      | 1.669 Å                       | Griesemer, S. D.; Ward, L.; Wolverton, C. <i>Phys. Rev. Mater.</i> <b>2021</b> , 5, 105003. LiNaSeO <sub>4</sub>                                                                                                                                  |
| 138659      | 1.670 Å                       | Griesemer, S. D.; Ward, L.; Wolverton, C. <i>Phys. Rev. Mater.</i> <b>2021</b> , 5, 105003. K <sub>2</sub> Sr(SeO <sub>4</sub> ) <sub>2</sub>                                                                                                     |
| 160682      | 1.671 Å                       | Smirnov, L. S.; Melnyk, G.; Zink, N.; Wozniak, K.; Dominiak, P.; Pawlukojs, A.; Loose, A.; Shuvalov, L. A. <i>Poverkhnostnye Fizika, Khimiya, Mekhanika</i> <b>2007</b> , 73-79. (NH <sub>4</sub> ) <sub>2</sub> (SeO <sub>4</sub> ) <sub>2</sub> |
| <b>Mean</b> | <b>1.635 Å/158 structures</b> |                                                                                                                                                                                                                                                   |



## Phosphate, PO<sub>4</sub><sup>3-</sup>

| ICSD/CSD code | d(P-O)  | Reference                                                                                                                                                                                                                                                                                                                                                                                                                                                                     |
|---------------|---------|-------------------------------------------------------------------------------------------------------------------------------------------------------------------------------------------------------------------------------------------------------------------------------------------------------------------------------------------------------------------------------------------------------------------------------------------------------------------------------|
| TEGZIO01      | 1.47 Å  | Banerjee, S.; Pal, A. K.; Pal, R. S.; Saha, S.; Banerjee, N.; Banerjee, A.; De, M. <i>Indian J. Phys., Ser. A</i> <b>2004</b> , <i>78</i> , 635. H <sub>3</sub> O(C <sub>4</sub> H <sub>7</sub> N <sub>4</sub> ) <sub>2</sub> PO <sub>4</sub>                                                                                                                                                                                                                                 |
| BADXIP        | 1.484 Å | Venediktov, A. B.; Tyutyunnik, A. P.; Gromilov, S. A. <i>Zh. Strukt. Khim.</i> <b>2010</b> , <i>51</i> , 1239. [Pt(NH <sub>3</sub> ) <sub>5</sub> Cl]PO <sub>4</sub> ·2H <sub>2</sub> O                                                                                                                                                                                                                                                                                       |
| ZIVSOQ        | 1.488 Å | Zhang, W.; Zhao, J.; Yang, D.; Li, B.; Feng, Y.; Wang, Y.; Zheng, X.; Yang, X.-J.; Wu, B. <i>Inorg. Chem. Front.</i> <b>2023</b> , <i>10</i> , 6384. K <sub>4</sub> ((n-C <sub>4</sub> H <sub>9</sub> ) <sub>4</sub> ) <sub>7</sub> ·((CH <sub>3</sub> ) <sub>3</sub> NC <sub>3</sub> H <sub>7</sub> NO)(PO <sub>4</sub> ) <sub>4</sub> ·4C <sub>63</sub> H <sub>48</sub> N <sub>18</sub> O <sub>12</sub> ·4C <sub>12</sub> H <sub>24</sub> O <sub>6</sub> ·4H <sub>2</sub> O |
| 97206         | 1.507 Å | Harrison, R. J.; Putnis, A.; Kockelmann, W. <i>Chem. Phys. Phys. Chem.</i> <b>2002</b> , <i>4</i> , 3252. Na <sub>3</sub> PO <sub>4</sub>                                                                                                                                                                                                                                                                                                                                     |
| INOBIZ        | 1.510 Å | Liang, L.; Li, B.; Zhang, W.; Li, A.; Zheng, B.; Yang, X.-J.; Wu, B. <i>Angew. Chem., Int. Ed.</i> <b>2021</b> , <i>60</i> , 9389. ((n-C <sub>3</sub> H <sub>7</sub> ) <sub>4</sub> N) <sub>6</sub> (PO <sub>4</sub> ) <sub>2</sub> ·3(C <sub>36</sub> H <sub>32</sub> N <sub>10</sub> O <sub>8</sub> )·6H <sub>2</sub> O                                                                                                                                                     |
| XUXKAE        | 1.510 Å | Custelcean, R.; Bonnesen, P. V.; Duncan, N. C.; Zhang, X.; Watson, L. A.; Van Berkel, G.; Parson, W. B.; Hay, B. P. <i>J. Am. Chem. Soc.</i> <b>2012</b> , <i>134</i> , 8525. [Ni <sub>4</sub> C <sub>138</sub> H <sub>120</sub> N <sub>36</sub> O <sub>66</sub> ]PO <sub>4</sub> (NO <sub>3</sub> ) <sub>3</sub> ·19H <sub>2</sub> O                                                                                                                                         |
| WOGNAI        | 1.512 Å | Ling, C.-S.; Yan, L. <i>Acta Crystallogr., Sect. E</i> <b>2008</b> , <i>64</i> , m1399. [Ni(NC <sub>14</sub> H <sub>10</sub> N <sub>2</sub> ) <sub>3</sub> ](PO <sub>4</sub> ) <sub>2</sub> SO <sub>4</sub>                                                                                                                                                                                                                                                                   |
| UFEMAX        | 1.514 Å | Li, B.; Wei, T.; Zhao, X.; Wang, Y.; Xu, L.; Yang, X.-J.; Wu, B. <i>Angew. Chem., Int. Ed.</i> <b>2023</b> , <i>62</i> , e202301300. ((C <sub>2</sub> H <sub>5</sub> ) <sub>4</sub> N) <sub>18</sub> (PO <sub>4</sub> ) <sub>6</sub> ·6C <sub>60</sub> H <sub>48</sub> N <sub>15</sub> O <sub>13</sub> P·2C <sub>20</sub> H <sub>42</sub> O <sub>11</sub> CN·(C <sub>2</sub> H <sub>5</sub> ) <sub>2</sub> O                                                                  |
| AGOPIZ        | 1.523 Å | Zhao, W. CCDC deposition number 2242798, <b>2023</b> . ((n-C <sub>4</sub> H <sub>9</sub> ) <sub>4</sub> N) <sub>6</sub> (PO <sub>4</sub> ) <sub>2</sub> ·3C <sub>42</sub> H <sub>38</sub> N <sub>10</sub> O <sub>4</sub> ·6CH <sub>3</sub> CN                                                                                                                                                                                                                                 |
| XAXJOX        | 1.525 Å | Zhang, Z.; Guo, J.; Fu, J.; Zheng, L.; Zhu, D.; Xu, Y.; Song, Y. <i>J. Cluster Sci.</i> <b>2012</b> , <i>23</i> , 177. (H <sub>3</sub> N(CH <sub>2</sub> ) <sub>2</sub> NH <sub>2</sub> (CH <sub>2</sub> ) <sub>2</sub> NH <sub>3</sub> ) <sub>4</sub> PO <sub>4</sub> [PV <sub>18</sub> O <sub>46</sub> ]·H <sub>2</sub> O                                                                                                                                                   |
| 158801        | 1.528 Å | Voronin, V. I.; Ponosov, Y. S.; Berger, I. F.; Proskurnina, N. V.; Zubkov, V. G.; Tyutyunnik, A. P.; Bushmeleva, S. N.; Balagurov, A. M.; Sheptyakov, D. V.; Burmakin, E. I.; Shekhtman, G. S.; Vovkotrub, E. G. <i>Neorg. Miner.</i> <b>2006</b> , <i>42</i> , 1001. K <sub>3</sub> PO <sub>4</sub>                                                                                                                                                                          |
| INOBAR        | 1.529 Å | Liang, L.; Li, B.; Zhang, W.; Li, A.; Zheng, B.; Yang, X.-J.; Wu, B. <i>Angew. Chem., Int. Ed.</i> <b>2021</b> , <i>60</i> , 9389. ((n-C <sub>4</sub> H <sub>9</sub> ) <sub>4</sub> N) <sub>6</sub> (PO <sub>4</sub> ) <sub>2</sub> ·3(C <sub>36</sub> H <sub>32</sub> N <sub>10</sub> O <sub>8</sub> )                                                                                                                                                                       |
| 33718         | 1.530 Å | Lissel, E.; Jansen, M.; Jansen, E.; Will, G. <i>Z. Kristallogr.</i> <b>1990</b> , <i>192</i> , 233. Na <sub>3</sub> PO <sub>4</sub>                                                                                                                                                                                                                                                                                                                                           |
| AFILIL        | 1.530 Å | Duan, W.-J.; Cui, X.-B.; Xu, Y.; Xu, J.-Q.; Yu, H.-H.; Yi, Z.-H.; Cui, J.-W.; Wang, T.-G. <i>J. Solid State Chem.</i> <b>2007</b> , <i>180</i> , 1875. (H <sub>3</sub> N(CH <sub>2</sub> ) <sub>2</sub> NH(CH <sub>2</sub> ) <sub>2</sub> NH <sub>3</sub> ) <sub>4</sub> (PO <sub>4</sub> ) <sub>2</sub> [H <sub>10</sub> V <sub>18</sub> O <sub>42</sub> ]·2H <sub>2</sub> O                                                                                                 |
| 137692        | 1.531 Å | Hazrah, K. S.; Antao, S. M. <i>Minerals</i> <b>2022</b> , <i>12</i> , 527. Ca <sub>5</sub> (PO <sub>4</sub> ) <sub>3</sub> F                                                                                                                                                                                                                                                                                                                                                  |
| PANYAI        | 1.531 Å | Holmes, J. L.; Russell, S. M.; Abrahams, B. F.; Hudson, T. A.; White, K. F. <i>Chemistry Open</i> <b>2020</b> , <i>2</i> , 577. [Rb <sub>6</sub> K <sub>2</sub> C <sub>84</sub> H <sub>96</sub> O <sub>36</sub> ]Rb(OC(NH <sub>2</sub> ) <sub>2</sub> ) <sub>6</sub> (PO <sub>4</sub> ) <sub>3</sub>                                                                                                                                                                          |
| AFOTAR        | 1.532 Å | Chen, S.-P.; Li, M.; Xiao, Y.; Yuan, Y.-X.; Pan, L.-L.; Yuan, L.-J. <i>CrystEngComm</i> <b>2008</b> , <i>10</i> , 1227. [Ni(NC <sub>3</sub> H <sub>5</sub> N) <sub>6</sub> ]PO <sub>4</sub> ·C <sub>3</sub> H <sub>5</sub> N <sub>2</sub> ·H <sub>2</sub> O                                                                                                                                                                                                                   |

|        |         |                                                                                                                                                                                                                                                                                                                                                                                                                      |
|--------|---------|----------------------------------------------------------------------------------------------------------------------------------------------------------------------------------------------------------------------------------------------------------------------------------------------------------------------------------------------------------------------------------------------------------------------|
| MEQZEQ | 1.532 Å | Bai, X.; Jia, C.; Zhao, Y.; Yang, D.; Wang, S.-C.; Li, A.; Chan, Y.-T.; Wang, Y.-Y.; Yang, X.-J.; Wu, B. <i>Angew. Chem., Int. Ed.</i> <b>2018</b> , <i>57</i> , 1851. $((\text{CH}_3)_4\text{N})_{12}(\text{PO}_4)_4 \cdot 6(\text{C}_{34}\text{H}_{28}\text{N}_{10}\text{O}_8) \cdot 3.6\text{O}(\text{C}_2\text{H}_5)_2 \cdot \text{H}_2\text{O}$                                                                 |
| UFELOK | 1.532 Å | Li, B.; Wei, T.; Zhao, X.; Wang, Y.; Xu, L.; Yang, X.-J.; Wu, B. <i>Angew. Chem., Int. Ed.</i> <b>2023</b> , <i>62</i> , e202301300. $((\text{C}_2\text{H}_5)_4\text{N})_{18}(\text{PO}_4)_6 \cdot 6\text{C}_{60}\text{H}_{48}\text{N}_{15}\text{O}_{13}\text{P} \cdot 19.5\text{CH}_3\text{CN} \cdot (\text{C}_2\text{H}_5)_2\text{O}$                                                                              |
| XUBPAO | 1.533 Å | Fu, J.; Zheng, B.; Zhang, H.; Zhao, Y.; Zhang, D.; Zhang, W.; Yang, X.-J.; Wu, B. <i>Chem. Commun.</i> <b>2020</b> , <i>56</i> , 2475. $((n\text{-C}_3\text{H}_7)_4\text{N})_3\text{PO}_4 \cdot \text{C}_{66}\text{H}_{63}\text{N}_{13}\text{O}_6$                                                                                                                                                                   |
| XECTUY | 1.533 Å | Wang, Y.; Li, B.; Zhu, J.; Zhang, W.; Zheng, B.; Zhao, W.; Tang, J.; Yang, X.-J.; Wu, B. <i>Angew. Chem., Int. Ed.</i> <b>2022</b> , <i>61</i> , e2020201789. $((\text{CH}_3)_4\text{N})_6[\text{K}_2\text{C}_{64}\text{H}_{80}\text{N}_{12}\text{O}_{20}]_3(\text{PO}_4)_4 \cdot 3(\text{C}_{40}\text{H}_{32}\text{N}_{12}\text{O}_8) \cdot (\text{C}_{12}\text{H}_{24}\text{O}_6) \cdot 6(\text{CH}_3)_2\text{CO}$ |
| 97205  | 1.534 Å | Harrison, R. J.; Putnis, A.; Kockelmann, W. <i>Chem. Phys. Phys. Chem.</i> <b>2002</b> , <i>4</i> , 3252. $\text{Na}_3\text{PO}_4$                                                                                                                                                                                                                                                                                   |
| IZOWAW | 1.534 Å | Nohra, B.; Moll, H. E.; Albelo, L. M. R.; Mialane, P.; Marrot, J.; Mellot-Draznieks, C.; O'Keefe, M.; Biboum, R. N.; Lemaire, J.; Keita, B.; Nadjo, L.; Dolbecq, A. <i>J. Am. Chem. Soc.</i> <b>2011</b> , <i>133</i> , 13363. $(n\text{-C}_4\text{H}_9)_4\text{N}[ \text{Mo}_{36}\text{Zn}_{12}\text{C}_{36}\text{H}_{24}\text{O}_{132} ](\text{PO}_4)_3 \cdot 18\text{H}_2\text{O}$                                |
| VULYOS | 1.534 Å | Yang, D.; Zhao, J.; Zhao, Y.; Lei, Y.; Cao, L.; Yang, X.-J.; Davi, M.; de Sousa, N. A.; Janiak, C.; Zhang, Z.; Wang, Y.-Y.; Wu, B. <i>Angew. Chem., Int. Ed.</i> <b>2015</b> , <i>54</i> , 8658. $\text{K}_{12}(\text{PO}_4)_4 \cdot 4(\text{C}_{66}\text{H}_{51}\text{N}_{15}\text{O}_{12}) \cdot 12(\text{C}_{12}\text{H}_{24}\text{O}_6) \cdot \text{CHClF}_2$                                                    |
| VULZOT | 1.534 Å | Yang, D.; Zhao, J.; Zhao, Y.; Lei, Y.; Cao, L.; Yang, X.-J.; Davi, M.; de Sousa, N. A.; Janiak, C.; Zhang, Z.; Wang, Y.-Y.; Wu, B. <i>Angew. Chem., Int. Ed.</i> <b>2015</b> , <i>54</i> , 8658. $\text{K}_{12}(\text{PO}_4)_4 \cdot 4(\text{C}_{66}\text{H}_{51}\text{N}_{15}\text{O}_{12}) \cdot 12(\text{C}_{12}\text{H}_{24}\text{O}_6) \cdot \text{CH}_3\text{Cl}_3$                                            |
| WUJJAP | 1.534 Å | Li, B.; Zheng, B.; Zhang, W.; Zhang, D.; Yang, X.-J.; Wu, B. <i>J. Am. Chem. Soc.</i> <b>2020</b> , <i>142</i> , 6304. $((\text{CH}_3)_4\text{N})_9(\text{C}_6\text{H}_{16}\text{NO})_3(\text{PO}_4)_4 \cdot 6(\text{C}_{34}\text{H}_{28}\text{N}_{10}\text{O}_8)$                                                                                                                                                   |
| INIZUD | 1.535 Å | Liang, L.; Li, B.; Zhang, W.; Li, A.; Zheng, B.; Yang, X.-J.; Wu, B. <i>Angew. Chem., Int. Ed.</i> <b>2021</b> , <i>60</i> , 9389. $[\text{KC}_{12}\text{H}_{24}\text{O}_6][(\text{C}_2\text{H}_5)_3\text{NH}](\text{PO}_4)_2 \cdot 6\text{H}_2\text{O} \cdot 3(\text{C}_{36}\text{H}_{32}\text{N}_{10}\text{O}_8)$                                                                                                  |
| INOBOF | 1.535 Å | Liang, L.; Li, B.; Zhang, W.; Li, A.; Zheng, B.; Yang, X.-J.; Wu, B. <i>Angew. Chem., Int. Ed.</i> <b>2021</b> , <i>60</i> , 9389. $[\text{KC}_{12}\text{H}_{24}\text{O}_6]_3((\text{CH}_3)_2\text{C}_2\text{H}_5\text{NH})_3(\text{PO}_4)_2 \cdot 6\text{H}_2\text{O} \cdot 3(\text{C}_{36}\text{H}_{32}\text{N}_{10}\text{O}_8)$                                                                                   |
| LIJBAJ | 1.535 Å | Li, R.; Zhao, Y.; Li, S.; Yang, P.; Huang, X.; Yang, X.-J.; Wu, B. <i>Inorg. Chem.</i> <b>2013</b> , <i>52</i> , 5851. $((n\text{-C}_4\text{H}_9)_4\text{N})_3\text{PO}_4 \cdot \text{C}_{20}\text{H}_{16}\text{N}_6\text{O}_4\text{S}_2$                                                                                                                                                                            |
| KEBKAH | 1.535 Å | Li, H.; Kou, L.; Liang, L.; Li, B.; Zhao, W.; Yang, X.-J.; Wu, B. <i>Chem. Sci.</i> <b>2022</b> , <i>13</i> , 4915. $((\text{CH}_3)_4\text{N})_6(\text{PO}_4)_2 \cdot 4(\text{C}_{38}\text{H}_{38}\text{N}_8\text{O}_4) \cdot 6((\text{CH}_3)_2\text{CO}) \cdot 2\text{CH}_3\text{CN} \cdot \text{H}_2\text{O}$                                                                                                      |
| ANUWEO | 1.535 Å | Wang, S.; Huang, Z.; Li, A.; Zhao, Y.; Zuo, W.; Li, Y.; Miao, H.; Ma, J.; Sun, W.; Wang, X.; Cao, L.; Wu, B.; Jia, C. <i>Angew. Chem., Int. Ed.</i> <b>2021</b> , <i>60</i> , 9573. $((\text{C}_2\text{H}_5)_4\text{N})_{12}(\text{PO}_4)_4 \cdot 3(\text{C}_{48}\text{H}_{46}\text{N}_{10}\text{O}_{14}) \cdot 3(\text{C}_{48}\text{H}_{46}\text{N}_{10}\text{O}_{14}) \cdot 3\text{CH}_3\text{CN}$                 |

|        |         |                                                                                                                                                                                                                                                                                                                                                                                                                                                            |
|--------|---------|------------------------------------------------------------------------------------------------------------------------------------------------------------------------------------------------------------------------------------------------------------------------------------------------------------------------------------------------------------------------------------------------------------------------------------------------------------|
| TOCQOV | 1.535 Å | Sun, Z.-Y.; Chen, S.-Q.; Liang, L.; Zhao, W.; Yang, X.-Y.; Wu, B. <i>Chem. Commun.</i> <b>2023</b> , <i>59</i> , 12923. ((CH <sub>3</sub> ) <sub>4</sub> N) <sub>3</sub> PO <sub>4</sub> ·C <sub>48</sub> H <sub>48</sub> N <sub>16</sub> O <sub>12</sub> ·2CH <sub>3</sub> CN                                                                                                                                                                             |
| 64059  | 1.536 Å | Avdontceva, M. S.; Krzhizhanovskaya, M. G.; Krivovichev, S. V.; Zolotarev, A. A.; Yakovenchuk, V. N. <i>J. Solid State Chem.</i> <b>2023</b> , <i>31</i> , 123779. Na <sub>2</sub> CaPO <sub>4</sub> F                                                                                                                                                                                                                                                     |
| 112808 | 1.536 Å | Yuan, F.; Hu, L.; Bai, Z.; Liu, L.; Huang, Y.; Zhang, Li.; Wei, D.; Lin, Z. <i>Inorg. Chem.</i> <b>2021</b> , <i>60</i> , 8103. K[Mg(H <sub>2</sub> O) <sub>6</sub> ]PO <sub>4</sub>                                                                                                                                                                                                                                                                       |
| BELJUA | 1.536 Å | Jia, C.; Zuo, W.; Yang, D.; Chen, Y.; Cao, L.; Custelcean, R.; Hostas, J.; Hobza, P.; Glaser, R.; Wang, Y.-Y.; Yang, X.-J.; Wu, B. <i>Nature Commun.</i> <b>2017</b> , <i>8</i> , 938. ((CH <sub>3</sub> ) <sub>4</sub> N) <sub>6</sub> (PO <sub>4</sub> ) <sub>2</sub> ·3(C <sub>41</sub> H <sub>34</sub> N <sub>10</sub> O <sub>8</sub> )·CH <sub>3</sub> CN·2H <sub>2</sub> O                                                                           |
| INOCAS | 1.536 Å | Liang, L.; Li, B.; Zhang, W.; Li, A.; Zheng, B.; Yang, X.-J.; Wu, B. <i>Angew. Chem., Int. Ed.</i> <b>2021</b> , <i>60</i> , 9389. ((CH <sub>3</sub> ) <sub>4</sub> N) <sub>6</sub> (PO <sub>4</sub> ) <sub>2</sub> ·3(C <sub>36</sub> H <sub>32</sub> N <sub>10</sub> O <sub>8</sub> )                                                                                                                                                                    |
| LINKOK | 1.536 Å | Jana, D.; Mani, G.; Schulzke, C. <i>Inorg. Chem.</i> <b>2013</b> , <i>52</i> , 6427. (C <sub>39</sub> H <sub>54</sub> N <sub>11</sub> )PO <sub>4</sub>                                                                                                                                                                                                                                                                                                     |
| RIHVIQ | 1.536 Å | Marques, I.; Costa, P. M. R.; Miranda, M. Q.; Busschaert, N.; Howe, E. N. W.; Clarke, H. J.; Haynes, C. J. E.; Kirby, I. L.; Rodilla, A. M.; Perez-Tomas, R.; Gale, P. A.; Felix, V. <i>Phys. Chem. Chem. Phys.</i> <b>2018</b> , <i>20</i> , 20796. (( <i>n</i> -C <sub>4</sub> H <sub>9</sub> ) <sub>4</sub> N) <sub>3</sub> PO <sub>4</sub> ·3(C <sub>26</sub> H <sub>18</sub> N <sub>4</sub> O <sub>4</sub> )·(CH <sub>3</sub> ) <sub>2</sub> SO       |
| VULYUY | 1.536 Å | Yang, D.; Zhao, J.; Zhao, Y.; Lei, Y.; Cao, L.; Yang, X.-J.; Davi, M.; de Sousa, N. A.; Janiak, C.; Zhang, Z.; Wang, Y.-Y.; Wu, B. <i>Angew. Chem., Int. Ed.</i> <b>2015</b> , <i>54</i> , 8658. K <sub>12</sub> (PO <sub>4</sub> ) <sub>4</sub> ·4(C <sub>66</sub> H <sub>51</sub> N <sub>15</sub> O <sub>12</sub> )·12(C <sub>12</sub> H <sub>24</sub> O <sub>6</sub> )·CH <sub>3</sub> F <sub>3</sub> ·CH <sub>3</sub> CN                               |
| WOLPUJ | 1.536 Å | Caltagirone, C.; Hiscock, J. R.; Hursthouse, M. B.; Light, M. E.; Gale, P. A. <i>Chem. Eur. J.</i> <b>2008</b> , <i>14</i> , 10236. (( <i>n</i> -C <sub>4</sub> H <sub>9</sub> ) <sub>4</sub> N) <sub>3</sub> PO <sub>4</sub> ·3(C <sub>17</sub> H <sub>14</sub> N <sub>4</sub> O)·1.5(CH <sub>3</sub> ) <sub>2</sub> SO                                                                                                                                   |
| XUBPIW | 1.536 Å | Fu, J.; Zheng, B.; Zhang, H.; Zhao, Y.; Zhang, D.; Zhang, W.; Yang, X.-J.; Wu, B. <i>Chem. Commun.</i> <b>2020</b> , <i>56</i> , 2475. ((C <sub>2</sub> H <sub>5</sub> ) <sub>4</sub> N) <sub>3</sub> PO <sub>4</sub> ·C <sub>63</sub> H <sub>57</sub> N <sub>13</sub> O <sub>6</sub>                                                                                                                                                                      |
| 125157 | 1.537 Å | Rucks, M. J.; Finkelstein, G. J.; Zhang, D.; Dera, P. K.; Duffy, T. S. <i>Am. Miner.</i> <b>2023</b> , <i>108</i> , 731. Ca <sub>5</sub> (PO <sub>4</sub> ) <sub>3</sub> F                                                                                                                                                                                                                                                                                 |
| NEYHAD | 1.537 Å | Zhang, W.; Yang, D.; Zhao, J.; Hou, L.; Sessler, J. L.; Yang, X.-J.; Wu, B. <i>J. Am. Chem. Soc.</i> <b>2018</b> , <i>140</i> , 5248. ((C <sub>2</sub> H <sub>5</sub> ) <sub>4</sub> N) <sub>3</sub> PO <sub>4</sub> ·(C <sub>63</sub> H <sub>48</sub> N <sub>18</sub> O <sub>12</sub> )·0.5CH <sub>3</sub> CN·2H <sub>2</sub> O                                                                                                                           |
| NEYHEH | 1.537 Å | Zhang, W.; Yang, D.; Zhao, J.; Hou, L.; Sessler, J. L.; Yang, X.-J.; Wu, B. <i>J. Am. Chem. Soc.</i> <b>2018</b> , <i>140</i> , 5248. K((C <sub>2</sub> H <sub>5</sub> ) <sub>4</sub> N) <sub>2</sub> PO <sub>4</sub> ·(C <sub>63</sub> H <sub>48</sub> N <sub>18</sub> O <sub>12</sub> )                                                                                                                                                                  |
| OMIJAX | 1.537 Å | Ji, L.; Yang, Z.; Zhao, Y.; Sun, M.; Cao, L.; Yang, X.-J.; Wang, Y.-Y.; Wu, B. <i>Angew. Chem., Int. Ed.</i> <b>2016</b> , <i>52</i> , 7310. ( <i>n</i> -C <sub>4</sub> H <sub>9</sub> ) <sub>4</sub> N(C <sub>6</sub> H <sub>11</sub> N <sub>2</sub> ) <sub>2</sub> PO <sub>4</sub> ·2(C <sub>39</sub> H <sub>46</sub> N <sub>6</sub> O <sub>10</sub> )·(O(C <sub>2</sub> H <sub>5</sub> ) <sub>2</sub> ) <sub>2</sub> (CH <sub>3</sub> ) <sub>2</sub> CO |
| VULZUZ | 1.537 Å | Yang, D.; Zhao, J.; Zhao, Y.; Lei, Y.; Cao, L.; Yang, X.-J.; Davi, M.; de Sousa, N. A.; Janiak, C.; Zhang, Z.; Wang, Y.-Y.; Wu, B. <i>Angew. Chem., Int. Ed.</i> <b>2015</b> , <i>54</i> , 8658. K <sub>12</sub> (PO <sub>4</sub> ) <sub>4</sub> ·4(C <sub>66</sub> H <sub>51</sub> N <sub>15</sub> O <sub>12</sub> )·12(C <sub>12</sub> H <sub>24</sub> O <sub>6</sub> )·CH <sub>3</sub> CCl <sub>2</sub> CH <sub>3</sub> ·2CH <sub>3</sub> CN            |

|        |         |                                                                                                                                                                                                                                                                                                                                                               |
|--------|---------|---------------------------------------------------------------------------------------------------------------------------------------------------------------------------------------------------------------------------------------------------------------------------------------------------------------------------------------------------------------|
| YEXXIL | 1.537 Å | Zuo, W.; Huang, Z.; Zhao, Y.; Xu, W.; Liu, Z.; Yang, X.-J.; Jia, C.; Wu, B. <i>Chem. Commun.</i> <b>2020</b> , 54, 7378. $((n\text{-C}_4\text{H}_9)_4\text{N})_5(\text{C}_6\text{H}_{16}\text{NO})(\text{PO}_4)_2 \cdot 3(\text{C}_{41}\text{H}_{34}\text{N}_{10}\text{O}_8) \cdot 2(\text{O}(\text{C}_2\text{H}_5)_2$                                        |
| XEDJOJ | 1.537 Å | Wang, Y.; Li, B.; Zhu, J.; Zhang, W.; Zheng, B.; Zhao, W.; Tang, J.; Yang, X.-J.; Wu, B. <i>Angew. Chem., Int. Ed.</i> <b>2022</b> , 61, e202201789. $[\text{KC}_{12}\text{H}_{24}\text{O}_6]_{12}(\text{PO}_4)_4 \cdot (\text{C}_{40}\text{H}_{32}\text{N}_{12}\text{O}_8)$                                                                                  |
| AVEQOJ | 1.538 Å | Zhou, Y.; Cao, L.; Lin, C.; Luo, M.; Yan, T.; Ye, N.; Cheng, W. <i>J. Mater. Chem. C</i> <b>2016</b> , 4, 9219. $(\text{CsMg}(\text{H}_2\text{O})_6\text{n}(\text{PO}_4)_\text{n}$                                                                                                                                                                            |
| DUVLEM | 1.538 Å | Jia, C.; Wu, B.; Li, S.; Yang, Z.; Zhao, Q.; Liang, J.; Li, Q.-S.; Yang, X.-J. <i>Chem. Commun.</i> <b>2010</b> , 46, 5376. $((n\text{-C}_4\text{H}_9)_4\text{N})_3\text{PO}_4 \cdot 2(\text{C}_{27}\text{H}_{22}\text{N}_8\text{O}_7) \cdot 2(\text{CH}_3)_2\text{SO}$                                                                                       |
| INIZEN | 1.538 Å | Liang, L.; Li, B.; Zhang, W.; Li, A.; Zheng, B.; Yang, X.-J.; Wu, B. <i>Angew. Chem., Int. Ed.</i> <b>2021</b> , 60, 9389. $[\text{KC}_{120}\text{H}_{164}\text{N}_{20}\text{O}_{42}][\text{KC}_{48}\text{H}_{56}\text{N}_{10}\text{O}_{14}][\text{KC}_{12}\text{H}_{28}\text{O}_8](\text{PO}_4)_2$                                                           |
| IXIBUB | 1.538 Å | Wen, X.; Lin, C.; Luo, M.; Fan, H.; Chen, K.; Y, N. <i>Sci. China Mater.</i> <b>2021</b> , 64, 2008. $(\text{C}(\text{NH}_2)_3)_3\text{PO}_4 \cdot 2\text{H}_2\text{O}$                                                                                                                                                                                       |
| NEZNUD | 1.538 Å | Dey, S. K.; Das, G. <i>Dalton Trans.</i> <b>2012</b> , 41, 8960. $((\text{C}_2\text{H}_5)_4\text{N})_3\text{PO}_4 \cdot 2\text{N}((\text{C}_9\text{H}_{10}\text{N}_3\text{O}_2\text{S})_3)$                                                                                                                                                                   |
| SOJKIO | 1.538 Å | Fan, X.; Zhang, D.; Jiang, S.; Wang, H.; Lin, L.-T.; Zheng, B.; Xu, W.-H.; Zhao, X.; Hay, B. P.; Chan, Y.-T.; Yang, X.-J.; Li, X.; Wu, B. <i>Chem. Sci.</i> <b>2019</b> , 10, 6278. $((\text{C}_2\text{H}_5)_4\text{N})_3\text{PO}_4 \cdot (\text{C}_{50}\text{H}_{44}\text{N}_{14}\text{O}_{10}) \cdot 3(\text{CH}_3)_2\text{CO}$                            |
| 37021  | 1.539 Å | Averbuch-Pouchot, M. T.; Durif, A. <i>J. Solid State Chem.</i> <b>1983</b> , 46, 193-196. $\text{Na}_3\text{PO}_4 \cdot 0.5\text{H}_2\text{O}$                                                                                                                                                                                                                |
| 39763  | 1.539 Å | Rastsvetaeva, R. K.; Khomyakov, A. P. <i>Kristallografiya</i> <b>1994</b> , 39, 43. $\text{LiNa}_5(\text{PO}_4)_2$                                                                                                                                                                                                                                            |
| GOXPAN | 1.539 Å | Li, B.; Zheng, B.; Zhang, W.; Zhang, D.; Yang, X.-J.; Wu, B. <i>Cryst. Growth Des.</i> <b>2019</b> , 19, 6527. $((\text{CH}_3)_4\text{N})_3\text{PO}_4 \cdot 2(\text{C}_{38}\text{H}_{38}\text{N}_8\text{O}_4) \cdot 4(\text{CH}_3)_2\text{CO} \cdot 8.5\text{H}_2\text{O}$                                                                                   |
| KIJHUJ | 1.539 Å | Gillen, D. M.; Hawes, C. S.; Gunnlaugsson, T. <i>J. Org. Chem.</i> <b>2018</b> , 83, 10398. $3((n\text{-C}_4\text{H}_9)\text{N})_3\text{PO}_4 \cdot 3(\text{C}_{22}\text{H}_{22}\text{N}_4\text{O}_4) \cdot 0.5\text{CHCl}_3$                                                                                                                                 |
| LUDZER | 1.539 Å | Mezei, G. <i>Chem. Commun.</i> <b>2015</b> , 51, 10341. $[\text{Cu}_{30}\text{C}_{93}\text{H}_{128}\text{N}_{60}\text{O}_{30}]((n\text{-C}_4\text{H}_9)\text{N})\text{PO}_4 \cdot 8\text{CH}_3\text{OH}$                                                                                                                                                      |
| NEYGUW | 1.539 Å | Zhang, W.; Yang, D.; Zhao, J.; Hou, L.; Sessler, J. L.; Yang, X.-J.; Wu, B. <i>J. Am. Chem. Soc.</i> <b>2018</b> , 140, 5248. $((n\text{-C}_4\text{H}_9)_4\text{N})_{12}(\text{PO}_4)_4 \cdot 4(\text{C}_{63}\text{H}_{48}\text{N}_{18}\text{O}_{12}) \cdot 2.5\text{CH}_3\text{CN} \cdot 6\text{H}_2\text{O}$                                                |
| SOJFEF | 1.539 Å | Fan, X.; Zhang, D.; Jiang, S.; Wang, H.; Lin, L.-T.; Zheng, B.; Xu, W.-H.; Zhao, X.; Hay, B. P.; Chan, Y.-T.; Yang, X.-J.; Li, X.; Wu, B. <i>Chem. Sci.</i> <b>2019</b> , 10, 6278. $((n\text{-C}_4\text{H}_9)_4\text{N})(\text{CH}_3)_4\text{N}(\text{PO}_4)_2 \cdot (\text{C}_{50}\text{H}_{44}\text{N}_{14}\text{O}_{10}) \cdot 2(\text{CH}_3)_2\text{CO}$ |
| SOJKEK | 1.539 Å | Fan, X.; Zhang, D.; Jiang, S.; Wang, H.; Lin, L.-T.; Zheng, B.; Xu, W.-H.; Zhao, X.; Hay, B. P.; Chan, Y.-T.; Yang, X.-J.; Li, X.; Wu, B. <i>Chem. Sci.</i> <b>2019</b> , 10, 6278. $((\text{CH}_3)_4\text{N})_3\text{PO}_4 \cdot (\text{C}_{50}\text{H}_{44}\text{N}_{14}\text{O}_{10}) \cdot 0.5\text{CH}_3\text{CN}$                                       |
| 20208  | 1.540 Å | Bondareva, O. S.; Simonov, M. A.; Belov, N. V. <i>Dokl. Akad. Nauk SSSR. Chem.</i> <b>1978</b> , 240, 75. $\text{Li}_3\text{PO}_4$                                                                                                                                                                                                                            |

|        |         |                                                                                                                                                                                                                                                                                                                                                                                                                                                                                                         |
|--------|---------|---------------------------------------------------------------------------------------------------------------------------------------------------------------------------------------------------------------------------------------------------------------------------------------------------------------------------------------------------------------------------------------------------------------------------------------------------------------------------------------------------------|
| 79427  | 1.540 Å | Wang, B.; Chakoumakos, B. C.; Sales, B. C.; Kwak, B. S.; Bates, J. B. <i>J. Solid State Chem.</i> <b>1995</b> , <i>115</i> , 313. Li <sub>3</sub> PO <sub>4</sub>                                                                                                                                                                                                                                                                                                                                       |
| GAYJAU | 1.540 Å | Witty, M.; Dingra, N. N.; Abboud, K. A.; Felts, A. C.; Theppawut; Ayudhya, I. N. <i>Anal. Lett.</i> <b>2017</b> , <i>50</i> , 2549.                                                                                                                                                                                                                                                                                                                                                                     |
| INOBEV | 1.540 Å | Liang, L.; Li, B.; Zhang, W.; Li, A.; Zheng, B.; Yang, X.-J.; Wu, B. <i>Angew. Chem., Int. Ed.</i> <b>2021</b> , <i>60</i> , 9389. [KC <sub>12</sub> H <sub>24</sub> O <sub>6</sub> ] <sub>7</sub> (C <sub>2</sub> H <sub>5</sub> ) <sub>2</sub> (CH <sub>3</sub> ) <sub>2</sub> N) <sub>5</sub> (PO <sub>4</sub> ) <sub>4</sub> ·6(C <sub>36</sub> H <sub>32</sub> N <sub>10</sub> O <sub>8</sub> )·6CH <sub>3</sub> CN·2H <sub>2</sub> O                                                              |
| MAJFEM | 1.540 Å | Li, B.; Zhang, W.; Lu, S.; Zheng, B.; Zhang, D.; Li, A.; Li, X.; Yang, X.-J.; Wu, B. <i>J. Am. Chem. Soc.</i> <b>2020</b> , <i>142</i> , 21160. (C <sub>2</sub> H <sub>5</sub> ) <sub>4</sub> N) <sub>6</sub> (PO <sub>4</sub> ) <sub>2</sub> ·3(C <sub>40</sub> H <sub>32</sub> N <sub>10</sub> O <sub>8</sub> )·xH <sub>2</sub> O                                                                                                                                                                     |
| OBEGAE | 1.540 Å | Liu, C.-M.; Zhang, D.-Q.; Xu, C.-Y.; Zhu, D.- B. <i>Solid State Sci.</i> <b>2004</b> , <i>6</i> , 689. [Co <sub>4</sub> Mo <sub>8</sub> V <sub>8</sub> C <sub>100</sub> H <sub>76</sub> N <sub>16</sub> O <sub>44</sub> ]PO <sub>4</sub> ·7H <sub>2</sub> O                                                                                                                                                                                                                                             |
| VUMLOG | 1.540 Å | Yang, D.; Zhao, J.; Zhao, Y.; Lei, Y.; Cao, L.; Yang, X.-J.; Davi, M.; de Sousa, N. A.; Janiak, C.; Zhang, Z.; Wang, Y.-Y.; Wu, B. <i>Angew. Chem., Int. Ed.</i> <b>2015</b> , <i>54</i> , 8658. (CH <sub>3</sub> ) <sub>4</sub> N) <sub>3</sub> (PO <sub>4</sub> ) <sub>2</sub> ·(C <sub>66</sub> H <sub>51</sub> N <sub>15</sub> O <sub>12</sub> )·0.5(C <sub>12</sub> H <sub>24</sub> O <sub>6</sub> )·0.5(C <sub>2</sub> H <sub>5</sub> ) <sub>2</sub> O·5.25H <sub>2</sub> O                       |
| WUJJET | 1.540 Å | Li, B.; Zheng, B.; Zhang, W.; Zhang, D.; Yang, X.-J.; Wu, B. <i>J. Am. Chem. Soc.</i> <b>2020</b> , <i>142</i> , 6304. ((CH <sub>3</sub> ) <sub>4</sub> N) <sub>9</sub> (C <sub>6</sub> H <sub>16</sub> NO) <sub>3</sub> (PO <sub>4</sub> ) <sub>4</sub> ·6(C <sub>34</sub> H <sub>28</sub> N <sub>10</sub> O <sub>8</sub> )                                                                                                                                                                            |
| ZIDNAB | 1.540 Å | Averbuch-Pouchot, M.-T.; Durif, A. <i>C. R. Seances Acad. Sci., Ser. II</i> <b>1993</b> , <i>317</i> , 1179. (CH <sub>6</sub> N <sub>3</sub> ) <sub>4</sub> (PO <sub>4</sub> )Cl·2H <sub>2</sub> O                                                                                                                                                                                                                                                                                                      |
| 39628  | 1.541 Å | Malinovskii, Y. A.; Genkina, E. A. <i>Kristallografiya</i> <b>1992</b> , <i>37</i> , 1429. LiNa <sub>5</sub> (PO <sub>4</sub> ) <sub>2</sub>                                                                                                                                                                                                                                                                                                                                                            |
| GELCAE | 1.541 Å | Sun, Z.-G.; Zhu, Y.-Y. CCDC deposition number 708771, <b>2017</b> . [Ni(H <sub>2</sub> O) <sub>4</sub> (N <sub>2</sub> C <sub>6</sub> H <sub>6</sub> N <sub>2</sub> )]PO <sub>4</sub> ·3H <sub>2</sub> O                                                                                                                                                                                                                                                                                                |
| UFELUQ | 1.541 Å | Li, B.; Wei, T.; Zhao, X.; Wang, Y.; Xu, L.; Yang, X.-J.; Wu, B. <i>Angew. Chem., Int. Ed.</i> <b>2023</b> , <i>62</i> , e202301300. ((C <sub>2</sub> H <sub>5</sub> ) <sub>4</sub> N) <sub>18</sub> (PO <sub>4</sub> ) <sub>6</sub> ·6C <sub>60</sub> H <sub>48</sub> N <sub>15</sub> O <sub>13</sub> P·2C <sub>7</sub> H <sub>14</sub> N <sub>6</sub>                                                                                                                                                 |
| EXIZIX | 1.542 Å | Wu, C.; Jiang, X.; Wang, Z.; Sha, H.; Lin, Z.; Huang, Z.; Long, X.; Humphrey, M. G.; Zhang, C. <i>Angew. Chem., Int. Ed.</i> <b>2021</b> , <i>60</i> , 14806. (C(NH <sub>2</sub> ) <sub>3</sub> ) <sub>3</sub> PO <sub>4</sub> ·1.5H <sub>2</sub> O                                                                                                                                                                                                                                                     |
| INOBUL | 1.542 Å | Liang, L.; Li, B.; Zhang, W.; Li, A.; Zheng, B.; Yang, X.-J.; Wu, B. <i>Angew. Chem., Int. Ed.</i> <b>2021</b> , <i>60</i> , 9389. [KC <sub>12</sub> H <sub>24</sub> O <sub>6</sub> ][KC <sub>12</sub> H <sub>26</sub> O <sub>8</sub> ] <sub>4</sub> ((C <sub>2</sub> H <sub>5</sub> ) <sub>2</sub> (CH <sub>3</sub> ) <sub>2</sub> N)(PO <sub>4</sub> ) <sub>2</sub> ·3(C <sub>36</sub> H <sub>32</sub> N <sub>10</sub> O <sub>8</sub> ) <sub>3</sub> ·2O(C <sub>2</sub> H <sub>5</sub> ) <sub>2</sub> |
| LIHZUZ | 1.542 Å | Li, R.; Zhao, Y.; Li, S.; Yang, P.; Huang, X.; Yang, X.-J.; Wu, B. <i>Inorg. Chem.</i> <b>2013</b> , <i>52</i> , 5851. ((CH <sub>3</sub> ) <sub>4</sub> N) <sub>3</sub> PO <sub>4</sub> ·3(C <sub>12</sub> H <sub>18</sub> N <sub>4</sub> O <sub>2</sub> )·4H <sub>2</sub> O                                                                                                                                                                                                                            |
| MAJFAI | 1.542 Å | Li, B.; Zhang, W.; Lu, S.; Zheng, B.; Zhang, D.; Li, A.; Li, X.; Yang, X.-J.; Wu, B. <i>J. Am. Chem. Soc.</i> <b>2020</b> , <i>142</i> , 21160. (CH <sub>3</sub> ) <sub>4</sub> N) <sub>6</sub> (PO <sub>4</sub> ) <sub>2</sub> ·3(C <sub>40</sub> H <sub>32</sub> N <sub>10</sub> O <sub>8</sub> )·xH <sub>2</sub> O                                                                                                                                                                                   |
| UFEMEB | 1.542 Å | Li, B.; Wei, T.; Zhao, X.; Wang, Y.; Xu, L.; Yang, X.-J.; Wu, B. <i>Angew. Chem., Int. Ed.</i> <b>2023</b> , <i>62</i> , e202301300. ((C <sub>2</sub> H <sub>5</sub> ) <sub>4</sub> N) <sub>18</sub> (PO <sub>4</sub> ) <sub>6</sub> ·6C <sub>60</sub> H <sub>48</sub> N <sub>15</sub> O <sub>13</sub> P·8(CH <sub>3</sub> ) <sub>2</sub> CO·( <i>i</i> -C <sub>3</sub> H <sub>7</sub> ) <sub>2</sub> O·4H <sub>2</sub> O                                                                               |

|        |         |                                                                                                                                                                                                                                                                                                                                                                                                                                                                       |
|--------|---------|-----------------------------------------------------------------------------------------------------------------------------------------------------------------------------------------------------------------------------------------------------------------------------------------------------------------------------------------------------------------------------------------------------------------------------------------------------------------------|
| VULYEI | 1.542 Å | Yang, D.; Zhao, J.; Zhao, Y.; Lei, Y.; Cao, L.; Yang, X.-J.; Davi, M.; de Sousa, N. A.; Janiak, C.; Zhang, Z.; Wang, Y.-Y.; Wu, B. <i>Angew. Chem., Int. Ed.</i> <b>2015</b> , <i>54</i> , 8658.<br>K <sub>12</sub> (PO <sub>4</sub> ) <sub>4</sub> ·4(C <sub>66</sub> H <sub>51</sub> N <sub>15</sub> O <sub>12</sub> )·12(C <sub>12</sub> H <sub>24</sub> O <sub>6</sub> )·CCl <sub>3</sub> F                                                                       |
| VULYIM | 1.542 Å | Yang, D.; Zhao, J.; Zhao, Y.; Lei, Y.; Cao, L.; Yang, X.-J.; Davi, M.; de Sousa, N. A.; Janiak, C.; Zhang, Z.; Wang, Y.-Y.; Wu, B. <i>Angew. Chem., Int. Ed.</i> <b>2015</b> , <i>54</i> , 8658.<br>K <sub>12</sub> (PO <sub>4</sub> ) <sub>4</sub> ·4(C <sub>66</sub> H <sub>51</sub> N <sub>15</sub> O <sub>12</sub> )·12(C <sub>12</sub> H <sub>24</sub> O <sub>6</sub> )·CCl <sub>2</sub> F <sub>2</sub>                                                          |
| WUJHUH | 1.542 Å | Li, B.; Zheng, B.; Zhang, W.; Zhang, D.; Yang, X.-J.; Wu, B. <i>J. Am. Chem. Soc.</i> <b>2020</b> , <i>142</i> , 6304.<br>((CH <sub>3</sub> ) <sub>4</sub> N) <sub>9</sub> (C <sub>6</sub> H <sub>16</sub> NO) <sub>3</sub> (PO <sub>4</sub> ) <sub>4</sub> ·6(C <sub>34</sub> H <sub>28</sub> N <sub>10</sub> O <sub>8</sub> )·6CH <sub>3</sub> CN                                                                                                                   |
| 69967  | 1.543 Å | Å Scitt Ercit, T. <i>Can. Minral.</i> <b>1991</b> , <i>29</i> , 569. Li <sub>2</sub> NaPO <sub>4</sub>                                                                                                                                                                                                                                                                                                                                                                |
| FIZNIO | 1.543 Å | Zuo, W.; Jia, C.; Zhang, H.; Zhao, Y.; Yang, X.-J.; Wu, B. <i>Chem. Sci.</i> <b>2019</b> , <i>10</i> , 2483.<br>((CH <sub>3</sub> ) <sub>2</sub> (C <sub>2</sub> H <sub>5</sub> OH)NH) <sub>3</sub> PO <sub>4</sub> ·(C <sub>60</sub> H <sub>57</sub> N <sub>13</sub> O <sub>6</sub> )·2CH <sub>3</sub> CN·H <sub>2</sub> O                                                                                                                                           |
| INIZOX | 1.543 Å | Liang, L.; Li, B.; Zhang, W.; Li, A.; Zheng, B.; Yang, X.-J.; Wu, B. <i>Angew. Chem., Int. Ed.</i> <b>2021</b> , <i>60</i> , 9389. [KC <sub>12</sub> H <sub>24</sub> O <sub>6</sub> ][(CH <sub>3</sub> ) <sub>2</sub> (C <sub>2</sub> H <sub>5</sub> )NH] <sub>4</sub> ) <sub>5</sub> (PO <sub>4</sub> ) <sub>2</sub> ·3(C <sub>36</sub> H <sub>32</sub> N <sub>10</sub> O <sub>8</sub> )                                                                             |
| LIHZAF | 1.543 Å | Li, R.; Zhao, Y.; Li, S.; Yang, P.; Huang, X.; Yang, X.-J.; Wu, B. <i>Inorg. Chem.</i> <b>2013</b> , <i>52</i> , 5851.<br>((n-C <sub>4</sub> H <sub>9</sub> ) <sub>4</sub> P) <sub>3</sub> P[KC <sub>32</sub> H <sub>40</sub> N <sub>6</sub> O <sub>12</sub> ] <sub>2</sub> PO <sub>4</sub> ·C <sub>20</sub> H <sub>16</sub> N <sub>6</sub> O <sub>6</sub>                                                                                                            |
| VUMLUM | 1.543 Å | Yang, D.; Zhao, J.; Zhao, Y.; Lei, Y.; Cao, L.; Yang, X.-J.; Davi, M.; de Sousa, N. A.; Janiak, C.; Zhang, Z.; Wang, Y.-Y.; Wu, B. <i>Angew. Chem., Int. Ed.</i> <b>2015</b> , <i>54</i> , 8658.<br>K <sub>3</sub> PO <sub>4</sub> ·4(C <sub>66</sub> H <sub>51</sub> N <sub>15</sub> O <sub>12</sub> )·1.75(C <sub>12</sub> H <sub>24</sub> O <sub>6</sub> )·1.5(CH <sub>3</sub> ) <sub>2</sub> CO·3.5H <sub>2</sub> O                                               |
| 50058  | 1.544 Å | Yamaguchi, H.; Matsuhira, T.; Take, S. <i>Osaka Kyoiku Daigaku Kiyō, Dai-3-bumon: Shizen Kagaku, Oyo Kagaku</i> <b>1997</b> , <i>45</i> , 265. Li <sub>3</sub> PO <sub>4</sub>                                                                                                                                                                                                                                                                                        |
| 60780  | 1.544 Å | Zalkin, A.; Templeton, D. H.; Eimerl, D.; Velsko, S. P. <i>Acta Crystallogr., Sect. C</i> <b>1986</b> , <i>42</i> , 1686.                                                                                                                                                                                                                                                                                                                                             |
| 77095  | 1.544 Å | Yakubovich, O. V.; Urusov, V. S. <i>Kristallografiya</i> <b>1997</b> , <i>42</i> , 301. Li <sub>3</sub> PO <sub>4</sub>                                                                                                                                                                                                                                                                                                                                               |
| 112808 | 1.544 Å | Yuan, F.; Hu, L.; Bai, Z.; Liu, L.; Huang, Y.; Zhang, Li.; Wei, D.; Lin, Z. <i>Inorg. Chem.</i> <b>2021</b> , <i>60</i> , 8103.<br>NH <sub>4</sub> [Mg(H <sub>2</sub> O) <sub>6</sub> ]PO <sub>4</sub>                                                                                                                                                                                                                                                                |
| LUDZIV | 1.544 Å | Mezei, G. <i>Chem. Commun.</i> <b>2015</b> , <i>51</i> , 10341. [Cu <sub>15</sub> C <sub>54</sub> H <sub>62</sub> N <sub>36</sub> O <sub>8</sub> ][(n-C <sub>4</sub> H <sub>9</sub> )N] <sub>2</sub> (PO <sub>4</sub> ) <sub>2</sub> ·1.5C <sub>6</sub> H <sub>5</sub> NO <sub>2</sub> ·1.5C <sub>6</sub> H <sub>5</sub> Br                                                                                                                                           |
| 10257  | 1.545 Å | Keffer, C.; Mighell, A. D.; Mauer, F.; Swanson, H.; Block, S. <i>Inorg. Chem.</i> <b>1967</b> , <i>6</i> , 119. Li <sub>3</sub> PO <sub>4</sub>                                                                                                                                                                                                                                                                                                                       |
| NOWCOT | 1.545 Å | Wu, B.; Li, S.; Lei, Y.; Hu, H.; Amadeu, N. de S.; Janiak, C.; Mathieson, J. S.; Long, D.-L.; Cronin, L.; Yang, X.-J. <i>Chem. Eur. J.</i> <b>2015</b> , <i>21</i> , 2588.<br>K <sub>6</sub> (PO <sub>4</sub> ) <sub>2</sub> ·3(C <sub>31</sub> H <sub>30</sub> N <sub>10</sub> O <sub>8</sub> ) <sub>6</sub> (C <sub>12</sub> H <sub>24</sub> O <sub>6</sub> )·3(C <sub>2</sub> H <sub>5</sub> ) <sub>2</sub> O·2(CH <sub>3</sub> ) <sub>2</sub> CO·H <sub>2</sub> O |
| XECVOU | 1.545 Å | Wang, Y.; Li, B.; Zhu, J.; Zhang, W.; Zheng, B.; Zhao, W.; Tang, J.; Yang, X.-J.; Wu, B. <i>Angew. Chem., Int. Ed.</i> <b>2022</b> , <i>61</i> , e202201789. ((CH <sub>3</sub> ) <sub>4</sub> N) <sub>12</sub> (PO <sub>4</sub> ) <sub>4</sub> ·6(C <sub>48</sub> H <sub>40</sub> N <sub>12</sub> O <sub>9</sub> )·3CH <sub>3</sub> CN·3H <sub>2</sub> O                                                                                                              |
| 681    | 1.546 Å | Weil, M.; Stöger, B. <i>Acta Crystallogr., Sect. E</i> <b>2020</b> , <i>76</i> , 177. K <sub>3</sub> PO <sub>4</sub> ·7D <sub>2</sub> O                                                                                                                                                                                                                                                                                                                               |



|        |         |                                                                                                                                                                                                                                                                                                                                                                                                               |
|--------|---------|---------------------------------------------------------------------------------------------------------------------------------------------------------------------------------------------------------------------------------------------------------------------------------------------------------------------------------------------------------------------------------------------------------------|
| GOXNOZ | 1.546 Å | Li, B.; Zheng, B.; Zhang, W.; Zhang, D.; Yang, X.-J.; Wu, B. <i>Cryst. Growth Des.</i> <b>2019</b> , <i>19</i> , 6527. $((\text{CH}_3)_4\text{N})_6(\text{PO}_4)_2 \cdot 4(\text{C}_{38}\text{H}_{38}\text{N}_8\text{O}_4) \cdot 9(\text{CH}_3)_2\text{CO} \cdot \text{CH}_3\text{CN} \cdot 10\text{H}_2\text{O}$                                                                                             |
| INIZIR | 1.546 Å | Liang, L.; Li, B.; Zhang, W.; Li, A.; Zheng, B.; Yang, X.-J.; Wu, B. <i>Angew. Chem., Int. Ed.</i> <b>2021</b> , <i>60</i> , 9389. $[\text{KC}_{12}\text{H}_{24}\text{O}_6]_2((\text{CH}_3)_2(\text{C}_2\text{H}_5)\text{NH})_4(\text{PO}_4)_2 \cdot 3(\text{C}_{36}\text{H}_{32}\text{N}_{10}\text{O}_8)$                                                                                                    |
| KEBKEL | 1.546 Å | Li, H.; Kou, L.; Liang, L.; Li, B.; Zhao, W.; Yang, X.-J.; Wu, B. <i>Chem. Sci.</i> <b>2022</b> , <i>13</i> , 4915. $((\text{CH}_3)_4\text{N})_3\text{PO}_4 \cdot (\text{C}_{52}\text{H}_{50}\text{N}_{12}\text{O}_6) \cdot ((\text{CH}_3)_2\text{CO}) \cdot 2\text{H}_2\text{O}$                                                                                                                             |
| SISPOD | 1.546 Å | Biswas, R.; Ghorai, S.; Paul, B.; Maji, S.; Natarajan, R. <i>Crystal Growth Des.</i> <b>2023</b> , <i>23</i> , 4384. $((n\text{-C}_4\text{H}_9)_4)_3\text{PO}_4 \cdot 3\text{C}_{37}\text{H}_{44}\text{N}_6\text{O}_3 \cdot 2\text{CH}_3\text{CN}$                                                                                                                                                            |
| ZIVSOQ | 1.546 Å | Zhang, W.; Zhao, J.; Yang, D.; Li, B.; Feng, Y.; Wang, Y.; Zheng, X.; Yang, X.-J.; Wu, B. <i>Inorg. Chem. Front.</i> <b>2023</b> , <i>10</i> , 6384. $((n\text{-C}_4\text{H}_9)_4)_{11} \cdot ((\text{CH}_3)_3\text{NC}_3\text{H}_7\text{NO})(\text{PO}_4)_3 \cdot 4\text{C}_{63}\text{H}_{48}\text{N}_{18}\text{O}_{12} \cdot 3\text{CH}_3\text{CN}$                                                         |
| 161677 | 1.547 Å | Voronin, V. I.; Berger, I. F.; Proskurnina, N. V.; Sheptyakov, D. V.; Goshchitskii, B. N.; Burmakin, E. I.; Stroev, S. S.; Shekhtman, G.S. <i>Neorg. Mater.</i> <b>2008</b> , <i>44</i> , 740. $\text{Rb}_3\text{PO}_4$                                                                                                                                                                                       |
| IZOWEA | 1.547 Å | Nohra, B.; Moll, H. E.; Albelo, L. M. R.; Mialane, P.; Marrot, J.; Mellot-Draznieks, C.; O'Keeffe, M.; Biboum, R. N.; Lemaire, J.; Keita, B.; Nadjo, L.; Dolbecq, A. <i>J. Am. Chem. Soc.</i> <b>2011</b> , <i>133</i> , 13363. $(n\text{-C}_4\text{H}_9)_4\text{N}_3[\text{Mo}_{12}\text{Zn}_4\text{C}_9\text{H}_6\text{O}_{42}]\text{PO}_4$                                                                 |
| OMIHUP | 1.547 Å | Ji, L.; Yang, Z.; Zhao, Y.; Sun, M.; Cao, L.; Yang, X.-J.; Wang, Y.-Y.; Wu, B. <i>Angew. Chem., Int. Ed.</i> <b>2016</b> , <i>52</i> , 7310. $(\text{C}_6\text{H}_{11}\text{N}_2)_2[\text{KC}_{49}\text{H}_{66}\text{N}_6\text{O}_{15}]\text{PO}_4 \cdot 2(\text{C}_37\text{H}_{42}\text{N}_6\text{O}_9) \cdot (\text{O}(\text{C}_2\text{H}_5)_2)_2 \cdot (\text{CH}_3)_2\text{CO}$                           |
| 257439 | 1.549 Å | Ayu, N. I. P.; Kartini, E.; Prayogi, L. D.; Faisal, M.; Supardi <i>Ionics</i> <b>2016</b> , <i>22</i> , 1051. $\text{Li}_3\text{PO}_4$                                                                                                                                                                                                                                                                        |
| BALHIJ | 1.549 Å | Zhao, C.; Zhao, J.; Yang, D.; Ronson, T. K.; Yu, L.; Zhang, H.; Zhang, W.; Zhao, F.; Sun, W.; Yang, X.-J.; Wu, B. <i>CCS Chem.</i> <b>2021</b> , <i>3</i> , 1990. $[\text{KC}_{180}\text{H}_{228}\text{N}_{32}\text{O}_{64}](\text{PO}_4)_2 \cdot 0.33\text{CHCl}_3$                                                                                                                                          |
| VUMBAI | 1.549 Å | Yang, D.; Zhao, J.; Zhao, Y.; Lei, Y.; Cao, L.; Yang, X.-J.; Davi, M.; de Sousa, N. A.; Janiak, C.; Zhang, Z.; Wang, Y.-Y.; Wu, B. <i>Angew. Chem., Int. Ed.</i> <b>2015</b> , <i>54</i> , 8658. $\text{K}_{12}(\text{PO}_4)_4 \cdot 4(\text{C}_{66}\text{H}_{51}\text{N}_{15}\text{O}_{12}) \cdot 12(\text{C}_{12}\text{H}_{24}\text{O}_6) \cdot n\text{-C}_4\text{H}_9\text{Cl} \cdot \text{CH}_3\text{CN}$ |
| 34221  | 1.550 Å | Baur, W. H. <i>Inorg. Nucl. Chem. Lett.</i> <b>1980</b> , <i>16</i> , 525. $\text{Li}_3\text{PO}_4$                                                                                                                                                                                                                                                                                                           |
| ESICOZ | 1.550 Å | Li, S.; Jia, C.; Wu, B.; Luo, Q.; Huang, X.; Yang, Z.; Li, Q.-S.; Yang, X.-J. <i>Angew. Chem., Int. Ed.</i> <b>2011</b> , <i>50</i> , 5721. $[\text{KC}_{12}\text{H}_{24}\text{O}_6]_6(\text{PO}_4)_2 \cdot 3(\text{C}_{30}\text{H}_{28}\text{N}_{10}\text{O}_8) \cdot 5(\text{CH}_3)_2\text{OS} \cdot 2(\text{C}_2\text{H}_5)_2\text{O} \cdot 3\text{H}_2\text{O}$                                           |
| 252841 | 1.551 Å | Li, L.; Wang, Yi; Lei, B.-H.; Han, S.; Yang, Z.; Poepelmeier, K. R.; Shilie, P. <i>J. Am. Chem. Soc.</i> <b>2016</b> , <i>138</i> , 9101. $\text{LiCs}_2\text{PO}_4$                                                                                                                                                                                                                                          |
| 23474  | 1.553 Å | Ganne, M.; Tournoux, M. <i>Compt. Rend. Seances l'Acad Sci, Ser. C</i> <b>1973</b> , <i>276</i> , 1755. $\text{Tl}_3\text{PO}_4$                                                                                                                                                                                                                                                                              |
| 253046 | 1.553 Å | Shen, Y.; Yang, Y.; Zhao, S.; Zhao, B.; Lin, Z.; Ji, Ch.; Li, L.; Fu, P.; Hong, M.; Luo, J. <i>Chem. Mater.</i> <b>2016</b> , <i>28</i> , 7110. $\text{LiCs}_2\text{PO}_4$                                                                                                                                                                                                                                    |
| LAWNUV | 1.553 Å | Yang, D.; Zhao, J.; Yu, L.; Lin, X.; Zhang, W.; Ma, H.; Gogoll, A.; Zhang, Z.; Yang, X.-J.; Wu, B. <i>J. Am. Chem. Soc.</i> <b>2017</b> , <i>139</i> , 5946. $\text{K}_3\text{PO}_4 \cdot (\text{C}_{66}\text{H}_{51}\text{N}_{15}\text{O}_{12}) \cdot 3(\text{C}_{12}\text{H}_{24}\text{O}_6) \cdot 0.25\text{P}_4 \cdot x\text{H}_2\text{O}$                                                                |

|             |                               |                                                                                                                                                                                                                                                                                                                                                                                                                                                 |
|-------------|-------------------------------|-------------------------------------------------------------------------------------------------------------------------------------------------------------------------------------------------------------------------------------------------------------------------------------------------------------------------------------------------------------------------------------------------------------------------------------------------|
| VULYAE      | 1.555 Å                       | Yang, D.; Zhao, J.; Zhao, Y.; Lei, Y.; Cao, L.; Yang, X.-J.; Davi, M.; de Sousa, N. A.; Janiak, C.; Zhang, Z.; Wang, Y.-Y.; Wu, B. <i>Angew. Chem., Int. Ed.</i> <b>2015</b> , <i>54</i> , 8658.<br>K <sub>12</sub> (PO <sub>4</sub> ) <sub>4</sub> ·4(C <sub>66</sub> H <sub>51</sub> N <sub>15</sub> O <sub>12</sub> )·12(C <sub>12</sub> H <sub>24</sub> O <sub>6</sub> )·CH <sub>3</sub> CN                                                 |
| WUJHOB      | 1.555 Å                       | Li, B.; Zheng, B.; Zhang, W.; Zhang, D.; Yang, X.-J.; Wu, B. <i>J. Am. Chem. Soc.</i> <b>2020</b> , <i>142</i> , 6304.<br>((CH <sub>3</sub> ) <sub>4</sub> N) <sub>9</sub> (C <sub>6</sub> H <sub>16</sub> NO) <sub>3</sub> (PO <sub>4</sub> ) <sub>4</sub> ·6(C <sub>34</sub> H <sub>28</sub> N <sub>10</sub> O <sub>8</sub> )·CH <sub>3</sub> CN                                                                                              |
| XUBPES      | 1.555 Å                       | Fu, J.; Zheng, B.; Zhang, H.; Zhao, Y.; Zhang, D.; Zhang, W.; Yang, X.-J.; Wu, B. <i>Chem. Commun.</i> <b>2020</b> , <i>56</i> , 2475. (( <i>n</i> -C <sub>3</sub> H <sub>7</sub> ) <sub>4</sub> N) <sub>3</sub> PO <sub>4</sub> ·C <sub>66</sub> H <sub>63</sub> N <sub>13</sub> O <sub>6</sub> ·0.5CH <sub>3</sub> CN·0.5H <sub>2</sub> O                                                                                                     |
| 161677      | 1.557 Å                       | Voronin, V. I.; Berger, I. F.; Proskurnina, N. V.; Sheptyakov, D. V.; Goshchitskii, B. N.; Burmakin, E. I.; Stroev, S. S.; Shekhtman, G.S. <i>Neorg. Mater.</i> <b>2008</b> , <i>44</i> , 740. Cs <sub>3</sub> PO <sub>4</sub>                                                                                                                                                                                                                  |
| 25816       | 1.559 Å                       | Zemann, J. <i>Acta Crystallogr.</i> <b>1960</b> , <i>13</i> , 863. Li <sub>3</sub> PO <sub>4</sub>                                                                                                                                                                                                                                                                                                                                              |
| VULZIN      | 1.561 Å                       | Yang, D.; Zhao, J.; Zhao, Y.; Lei, Y.; Cao, L.; Yang, X.-J.; Davi, M.; de Sousa, N. A.; Janiak, C.; Zhang, Z.; Wang, Y.-Y.; Wu, B. <i>Angew. Chem., Int. Ed.</i> <b>2015</b> , <i>54</i> , 8658.<br>K <sub>12</sub> (PO <sub>4</sub> ) <sub>4</sub> ·4(C <sub>66</sub> H <sub>51</sub> N <sub>15</sub> O <sub>12</sub> )·12(C <sub>12</sub> H <sub>24</sub> O <sub>6</sub> )·CCl <sub>4</sub> ·2CH <sub>3</sub> CN                              |
| LAWPAD      | 1.562 Å                       | Yang, D.; Zhao, J.; Yu, L.; Lin, X.; Zhang, W.; Ma, H.; Gogoll, A.; Zhang, Z.; Yang, X.-J.; Wu, B. <i>J. Am. Chem. Soc.</i> <b>2017</b> , <i>139</i> , 5946. K <sub>3</sub> PO <sub>4</sub> ·(C <sub>66</sub> H <sub>51</sub> N <sub>15</sub> O <sub>12</sub> )·3(C <sub>12</sub> H <sub>24</sub> O <sub>6</sub> )·0.25As <sub>4</sub> ·xH <sub>2</sub> O                                                                                       |
| VULZAF      | 1.563 Å                       | Yang, D.; Zhao, J.; Zhao, Y.; Lei, Y.; Cao, L.; Yang, X.-J.; Davi, M.; de Sousa, N. A.; Janiak, C.; Zhang, Z.; Wang, Y.-Y.; Wu, B. <i>Angew. Chem., Int. Ed.</i> <b>2015</b> , <i>54</i> , 8658.<br>K <sub>12</sub> (PO <sub>4</sub> ) <sub>4</sub> ·4(C <sub>66</sub> H <sub>51</sub> N <sub>15</sub> O <sub>12</sub> )·12(C <sub>12</sub> H <sub>24</sub> O <sub>6</sub> )·CH <sub>2</sub> Cl <sub>2</sub>                                    |
| VULZEJ      | 1.57 Å                        | Yang, D.; Zhao, J.; Zhao, Y.; Lei, Y.; Cao, L.; Yang, X.-J.; Davi, M.; de Sousa, N. A.; Janiak, C.; Zhang, Z.; Wang, Y.-Y.; Wu, B. <i>Angew. Chem., Int. Ed.</i> <b>2015</b> , <i>54</i> , 8658.<br>K <sub>12</sub> (PO <sub>4</sub> ) <sub>4</sub> ·4(C <sub>66</sub> H <sub>51</sub> N <sub>15</sub> O <sub>12</sub> )·12(C <sub>12</sub> H <sub>24</sub> O <sub>6</sub> )·CHCl <sub>3</sub>                                                  |
| IZOWIE      | 1.573 Å                       | Nohra, B.; Moll, H. E.; Albelo, L. M. R.; Mialane, P.; Marrot, J.; Mellot-Draznieks, C.; O'Keeffe, M.; Biboum, R. N.; Lemaire, J.; Keita, B.; Nadjo, L.; Dolbecq, A. <i>J. Am. Chem. Soc.</i> <b>2011</b> , <i>133</i> , 13363.<br>( <i>n</i> -C <sub>4</sub> H <sub>9</sub> ) <sub>4</sub> N) <sub>3</sub> [Mo <sub>12</sub> Zn <sub>4</sub> C <sub>9</sub> H <sub>6</sub> O <sub>42</sub> ](PO <sub>4</sub> ) <sub>3</sub> ·8H <sub>2</sub> O |
| <b>Mean</b> | <b>1.540 Å/118 structures</b> |                                                                                                                                                                                                                                                                                                                                                                                                                                                 |



## Arsenate ion, AsO<sub>4</sub><sup>3-</sup>

| ICSD/CSD code | <i>d</i> (As-O) | Reference                                                                                                                                                                                                                                                                                                                                             |
|---------------|-----------------|-------------------------------------------------------------------------------------------------------------------------------------------------------------------------------------------------------------------------------------------------------------------------------------------------------------------------------------------------------|
| AXIGIZ        | 1.641 Å         | Mhadhbi, N.; Naili, H.; Jarraya, K. <i>Phys. E</i> <b>2017</b> , <i>87</i> , 171. (C <sub>5</sub> H <sub>8</sub> N <sub>2</sub> )(C <sub>5</sub> H <sub>7</sub> N <sub>2</sub> )AsO <sub>4</sub> ·H <sub>2</sub> O                                                                                                                                    |
| GOJRUU        | 1.641 Å         | Ennaceur, N. CCDC deposition number 849637, <b>2011</b> . (C <sub>5</sub> H <sub>8</sub> N <sub>2</sub> )(C <sub>5</sub> H <sub>7</sub> N <sub>2</sub> )AsO <sub>4</sub> ·H <sub>2</sub> O                                                                                                                                                            |
| 24548         | 1.657 Å         | Ferrari, A.; Cavalca, L.; Nardelli, M. <i>Gazz. Chim. Ital.</i> <b>1954</b> , <i>84</i> , 169. CsMg(AsO <sub>4</sub> )(H <sub>2</sub> O) <sub>6</sub>                                                                                                                                                                                                 |
| 419835        | 1.659 Å         | Weil, M. <i>Cryst. Res. Technol.</i> <b>2008</b> , <i>43</i> , 1286. Rb(Mg(H <sub>2</sub> O) <sub>6</sub> )(AsO <sub>4</sub> )                                                                                                                                                                                                                        |
| BIRSUO        | 1.661 Å         | Rius, J.; Gali, S. <i>Cryst. Struct. Commun.</i> <b>1982</b> , <i>11</i> , 829. [Co(H <sub>2</sub> NCH <sub>2</sub> CH <sub>2</sub> NH <sub>2</sub> ) <sub>3</sub> ] <sub>6</sub> AsO <sub>4</sub> ·3H <sub>2</sub> O                                                                                                                                 |
| 9159          | 1.670 Å         | Tillmanns, E.; Baur, W. H. <i>Acta Crystallogr. Sect. B</i> <b>1971</b> , <i>27</i> , 21124. Na <sub>3</sub> AsO <sub>4</sub> ·NaOH·12H <sub>2</sub> O                                                                                                                                                                                                |
| 2832          | 1.674 Å         | Dickens, B.; Brown, W. <i>Acta Crystallogr. Sect. B</i> <b>1972</b> , <i>B 28</i> , 3056. CaKAsO <sub>4</sub> (H <sub>2</sub> O) <sub>8</sub>                                                                                                                                                                                                         |
| 419836        | 1.674 Å         | Weil, M. <i>Cryst. Res. Technol.</i> <b>2008</b> , <i>43</i> , 1286. Rb(Mg(H <sub>2</sub> O) <sub>6</sub> )(AsO <sub>4</sub> )                                                                                                                                                                                                                        |
| 412391        | 1.677 Å         | Emmerling, F.; Idilbi, M.; Rohr, C. <i>Z. Naturforsch., Sect. B</i> <b>2002</b> , <i>57</i> , 599. Cs <sub>3</sub> AsO <sub>4</sub>                                                                                                                                                                                                                   |
| LEPRUX        | 1.678 Å         | Dey, S. K.; Gil-Hernandez, B.; Gobre, V. V.; Woschko, D.; Harmalkar, S. S.; Gayen, F. R.; Saha, B.; Goswamee, R. L.; Janiak, C. <i>Dalton Trans.</i> <b>2022</b> , <i>51</i> , 15239. (( <i>n</i> -C <sub>4</sub> H <sub>9</sub> ) <sub>4</sub> N) <sub>3</sub> AsO <sub>4</sub> ·2(C <sub>48</sub> H <sub>45</sub> N <sub>13</sub> O <sub>12</sub> ) |
| 78158         | 1.681 Å         | Abrahams, I.; Bruce, P. G.; David, W. I. F.; West, A. R. <i>J. Solid State Chem.</i> <b>1994</b> , <i>110</i> , 243. Li <sub>3</sub> AsO <sub>4</sub>                                                                                                                                                                                                 |
| 412391        | 1.681 Å         | Emmerling, F.; Idilbi, M.; Röhr, C. <i>Z. Naturforsch., Sect. B</i> <b>2002</b> , <i>57</i> , 599. K <sub>3</sub> AsO <sub>4</sub>                                                                                                                                                                                                                    |
| LINKUQ        | 1.684 Å         | Jana, D.; Mani, G.; Schulzke, C. <i>Inorg. Chem.</i> <b>2013</b> , <i>52</i> , 6427. (C <sub>39</sub> H <sub>54</sub> N <sub>11</sub> )AsO <sub>4</sub> ·17H <sub>2</sub> O                                                                                                                                                                           |
| 1319          | 1.685 Å         | Hseu, T.; Lu, T. <i>Acta Crystallogr. Sect. B</i> <b>1977</b> , <i>33</i> , 3947. (NH <sub>4</sub> ) <sub>3</sub> AsO <sub>4</sub>                                                                                                                                                                                                                    |
| SISPUJ        | 1.685 Å         | Biswas, R.; Ghorai, S.; Paul, B.; Maji, S.; Natarajan, R. <i>Cryst. Growth Des.</i> <b>2023</b> , <i>23</i> , 4384. ( <i>n</i> -C <sub>4</sub> H <sub>9</sub> ) <sub>4</sub> N) <sub>3</sub> AsO <sub>4</sub> ·3(C <sub>37</sub> H <sub>44</sub> N <sub>6</sub> O <sub>3</sub> )·3CH <sub>3</sub> CN                                                  |
| TAWSUJ        | 1.685 Å         | Wang, D.; Wei, Z.; Bai, Z.; Liu, L.; Lin, Z.; Zhang, L. <i>Dalton Trans.</i> <b>2022</b> , <i>51</i> , 463. (C(NH <sub>2</sub> ) <sub>3</sub> ) <sub>3</sub> AsO <sub>4</sub> ·2H <sub>2</sub> O                                                                                                                                                      |
| 36533         | 1.688 Å         | Schneidersmann, C.; Hoppe, R. <i>Z. Anorg. Allg. Chem.</i> <b>1991</b> , <i>605</i> , 67. Cs <sub>2</sub> NaAsO <sub>4</sub>                                                                                                                                                                                                                          |
| 73200         | 1.688 Å         | Schneidersmann, C.; Hoppe, R. <i>Anorg. Allg. Chem.</i> <b>1993</b> , <i>619</i> , 766. Na <sub>2</sub> LiAsO <sub>4</sub>                                                                                                                                                                                                                            |
| 75927         | 1.689 Å         | Elfakir, A.; Wallez, G.; Querton, M.; Pannetier, J. <i>Phase Trans.</i> <b>1993</b> , <i>45</i> , 281. Li <sub>3</sub> AsO <sub>4</sub>                                                                                                                                                                                                               |
| 87465         | 1.689 Å         | Mathew, M. <i>J. Chem. Crystallogr.</i> <b>1998</b> , <i>28</i> , 741. SrK(AsO <sub>4</sub> )(H <sub>2</sub> O) <sub>8</sub>                                                                                                                                                                                                                          |
| PIQXIA        | 1.689 Å         | Zhou, W.; Wang, F.; Li, A.; Bai, S.; Feng, X.; He, Q. <i>Cell Rep. Phys. Sci.</i> <b>2023</b> , <i>4</i> , 101295. ( <i>n</i> -C <sub>4</sub> H <sub>9</sub> ) <sub>4</sub> N) <sub>2</sub> (C <sub>84</sub> H <sub>116</sub> N <sub>18</sub> O <sub>6</sub> )AsO <sub>4</sub> ·2H <sub>2</sub> O                                                     |
| 36644         | 1.690 Å         | Schneidersmann, C.; Hoppe, R. <i>Z. Anorg. Allg. Chem.</i> <b>1992</b> , <i>610</i> , 103. Rb <sub>2</sub> LiAsO <sub>4</sub>                                                                                                                                                                                                                         |
| LUDZOB        | 1.691 Å         | Mezei, G. <i>Chem. Commun.</i> <b>2015</b> , <i>51</i> , 10341. [Cu <sub>15</sub> C <sub>54</sub> H <sub>62</sub> N <sub>36</sub> O <sub>8</sub> ][(n-C <sub>4</sub> H <sub>9</sub> ) <sub>4</sub> N] <sub>2</sub> (AsO <sub>4</sub> ) <sub>2</sub> ·C <sub>6</sub> H <sub>5</sub> Br·C <sub>6</sub> H <sub>5</sub> NO <sub>2</sub>                   |
| 407561        | 1.692 Å         | Effenberger, H. <i>Z. Kristallogr.</i> <b>1998</b> , <i>213</i> , 42. Tl <sub>3</sub> AsO <sub>4</sub>                                                                                                                                                                                                                                                |
| 36645         | 1.696 Å         | Schneidersmann, C.; Hoppe, R. <i>Z. Anorg. Allg. Chem.</i> <b>1992</b> , <i>610</i> , 103. Cs <sub>2</sub> LiAsO <sub>4</sub>                                                                                                                                                                                                                         |
| 412392        | 1.702 Å         | Emmerling, F.; Idilbi, M.; Röhr, C. <i>Z. Naturforsch., Sect. B</i> <b>2002</b> , <i>57</i> , 599. Cs <sub>3</sub> AsO <sub>4</sub>                                                                                                                                                                                                                   |

Mean 1.679 Å/26 structures

Vanadate, VO<sub>4</sub><sup>3-</sup>

| ICSD/CSD code | d(V-O)  | Reference                                                                                                                                                                                                                                                                                      |
|---------------|---------|------------------------------------------------------------------------------------------------------------------------------------------------------------------------------------------------------------------------------------------------------------------------------------------------|
| 4138          | 1.623 Å | Olazcuaga, R.; Reau, J. M.; le Fem, G.; Hagemuller, P. . <i>Z. Anorg. Allg. Chem.</i> <b>1975</b> , 412, 271. K <sub>3</sub> VO <sub>4</sub>                                                                                                                                                   |
| 64423         | 1.671 Å | Sánchez-Martín, J.; Errandonea, D.; Rahimi Mosafer, H. S.; Paszkowicz, W.; Minikayev, R.; Turnbull, R.; Berkowski, M.; Ibáñez-Insa, J.; Popescu, C.; Fitch, A.; Rodríguez-Hernández, P.; Muñoz, A. <i>CrystEngComm</i> <b>2023</b> , 25, 1240. Ca <sub>3</sub> (VO <sub>4</sub> ) <sub>2</sub> |
| 123625        | 1.677 Å | Kuz'micheva, G. M.; Ivleva, L. I.; Kaurova, I. A.; Khramov, E. V.; Lazarenko, V. A.; Rybakov, V. B.; Svetogorov, R. D.; Doroshenko, M. E. <i>Dalton Trans.</i> <b>2022</b> , 51, 5673. Ca <sub>3.01</sub> (VO <sub>4</sub> ) <sub>2</sub>                                                      |
| 54655         | 1.679 Å | Fop, S.; Dawson, J. A.; Tawse, D. N.; Skellern, M. G.; Skakle, J. M. S.; Mclaughlin, A. C. <i>Chem. Mater.</i> <b>2022</b> , 34, 8190. Sr <sub>3</sub> (VO <sub>4</sub> ) <sub>2</sub>                                                                                                         |
| 80667         | 1.691 Å | Jouanneaux, A.; Joubert, O.; Fitch, A. N.; Ganne, M. <i>Mater. Res. Bull.</i> <b>1991</b> , 26, 973. Tl <sub>3</sub> VO <sub>4</sub>                                                                                                                                                           |
| 54740         | 1.708 Å | Matsuura, M.; Okudera, H. <i>Acta Crystallogr., Sect. B</i> <b>2022</b> , 78, 789. Ca <sub>5</sub> (VO <sub>4</sub> ) <sub>3</sub> Cl                                                                                                                                                          |
| 49917         | 1.711 Å | Kato, K.; Takayama Muromachi, E. <i>Acta Crystallogr., Sect. C</i> <b>1987</b> , 43, 2040. K <sub>3</sub> VO <sub>4</sub> ·H <sub>2</sub> O                                                                                                                                                    |
| 173216        | 1.711 Å | Schnabel, S.; Roehr, C. <i>Z. Naturforsch., Teil B</i> <b>2007</b> , 62, 1235. Li <sub>3</sub> VO <sub>4</sub> ·6H <sub>2</sub> O                                                                                                                                                              |
| 54658         | 1.712 Å | Fop, S.; Dawson, J. A.; Tawse, D. N.; Skellern, M. G.; Skakle, J. M. S.; Mclaughlin, A. C. <i>Chem. Mater.</i> <b>2022</b> , 34, 8190. Ba <sub>3</sub> (VO <sub>4</sub> ) <sub>2</sub>                                                                                                         |
| 40218         | 1.714 Å | Kissel, J.; Hoppe, R. <i>Z. Anorg. Allg. Chem.</i> <b>1989</b> , 571, 113. Rb <sub>2</sub> LiVO <sub>4</sub>                                                                                                                                                                                   |
| 416171        | 1.715 Å | Kerp, O.; Möller, A. <i>Z. Anorg. Allg. Chem.</i> <b>2006</b> , 632, 1187. Na <sub>4</sub> VO <sub>4</sub> OH                                                                                                                                                                                  |
| 416170        | 1.717 Å | Kerp, O.; Möller, A. <i>Z. Anorg. Allg. Chem.</i> <b>2006</b> , 632, 1187. Na <sub>5</sub> VO <sub>4</sub> O                                                                                                                                                                                   |
| 62533         | 1.716 Å | Kato, K.; Takayama Muromachi, E. <i>Acta Crystallogr., Sect. C</i> <b>1987</b> , 43, 1030. Na <sub>3</sub> VO <sub>4</sub> ·3H <sub>2</sub> O                                                                                                                                                  |
| 173217        | 1.718 Å | Schnabel, S.; Roehr, C. <i>Z. Naturforsch., Teil B</i> <b>2007</b> , 62, 1235. Li <sub>3</sub> VO <sub>4</sub> ·8H <sub>2</sub> O                                                                                                                                                              |
| 65963         | 1.719 Å | Kissel, J.; Hoppe, R. <i>Z. Anorg. Allg. Chem.</i> <b>1990</b> , 587, 29. Cs <sub>2</sub> NaVO <sub>4</sub>                                                                                                                                                                                    |
| 173218        | 1.719 Å | Schnabel, S.; Roehr, C. <i>Z. Naturforsch., Teil B</i> <b>2007</b> , 62, 1235. Li <sub>3</sub> VO <sub>4</sub> ·8H <sub>2</sub> O                                                                                                                                                              |
| 61171         | 1.721 Å | Kato, K.; Takayama Muromachi, E. <i>Acta Crystallogr., Sect. C</i> <b>1985</b> , 41, 1415. Rb <sub>3</sub> VO <sub>4</sub> ·4H <sub>2</sub> O                                                                                                                                                  |
| 281577        | 1.722 Å | Boström, D.; Bergquist, G.; Pettersson, L. <i>Acta Crystallogr., Sect. E</i> <b>2003</b> , 59, i151. NaRb <sub>2</sub> VO <sub>4</sub> ·H <sub>2</sub> O                                                                                                                                       |
| 108936        | 1.729 Å | Olazcuaga, R.; Reau, J. M.; le Flem, G.; Hagenmuller, P. <i>Z. Anorg. Allg. Chem.</i> <b>1975</b> , 412, 271. Tl <sub>3</sub> VO <sub>4</sub>                                                                                                                                                  |
| 38121         | 1.731 Å | Synecek, V.; Hanic, P. <i>Czech. J. Phys.</i> <b>1954</b> , 4, 120. (NH <sub>4</sub> ) <sub>3</sub> VO <sub>4</sub>                                                                                                                                                                            |
| 138916        | 1.731 Å | Griesemer, S. D.; Ward, L.; Wolverton, C. <i>Phys. Rev. Mater.</i> <b>2021</b> , 5, 105003. RbSrVO <sub>4</sub>                                                                                                                                                                                |

|             |                              |                                                                                                                                                |
|-------------|------------------------------|------------------------------------------------------------------------------------------------------------------------------------------------|
| 138852      | 1.732 Å                      | Griesemer, S. D.; Ward, L.; Wolverton, C. <i>Phys. Rev. Mater.</i> <b>2021</b> , 5, 105003. Ca <sub>5</sub> (VO <sub>4</sub> ) <sub>3</sub> Br |
| 138851      | 1.735 Å                      | Griesemer, S. D.; Ward, L.; Wolverton, C. <i>Phys. Rev. Mater.</i> <b>2021</b> , 5, 105003. Ba <sub>5</sub> (VO <sub>4</sub> ) <sub>3</sub> Br |
| 164689      | 1.737 Å                      | Smrcok, L.; Bitschnau, B.; Filinchuk, Y. <i>Cryst. Res. Technol.</i> <b>2009</b> , 44, 978. (NH <sub>4</sub> ) <sub>3</sub> VO <sub>4</sub>    |
| 40219       | 1.742 Å                      | Kissel, J.; Hoppe, R. <i>Z. Anorg. Allg. Chem.</i> <b>1989</b> , 571, 113. Cs <sub>2</sub> LiVO <sub>4</sub>                                   |
| <b>Mean</b> | <b>1.715 Å/24 structures</b> |                                                                                                                                                |

### Hydrogenvanadate, HVO<sub>4</sub><sup>2-</sup>

| ICSD/CSD code | <i>d(V-O)</i>              | Reference                                                                                                  |
|---------------|----------------------------|------------------------------------------------------------------------------------------------------------|
| PEVXAP        | 3*1.674+1.817 Å            | Aschwanden, S.; Schmalle, H. W.; Reller, A.; Oswald, H. R. <i>Mater. Res. Bull.</i> <b>1993</b> , 28, 575. |
| <b>Mean</b>   | <b>1.710 Å/1 structure</b> |                                                                                                            |

## Structure of CrO<sub>4</sub><sup>2-</sup>

| ICSD/CSD code | d(Cr-O) | Reference                                                                                                                                                                                                                                                                                                                                                             |
|---------------|---------|-----------------------------------------------------------------------------------------------------------------------------------------------------------------------------------------------------------------------------------------------------------------------------------------------------------------------------------------------------------------------|
| KUJPOV        | 1.556 Å | Bian, S.-D.; Wu, H.-B.; Wang, Q.-M. <i>Angew. Chem., Int Ed.</i> <b>2009</b> , <i>48</i> , 5363. [Ag <sub>22</sub> C <sub>108</sub> H <sub>162</sub> ]CrO <sub>4</sub> (BF <sub>4</sub> ) <sub>2</sub>                                                                                                                                                                |
| 76001         | 1.600 Å | Niggli, A. <i>Acta Crystallogr.</i> <b>1954</b> , <i>7</i> , 776. Na <sub>2</sub> CrO <sub>4</sub>                                                                                                                                                                                                                                                                    |
| 159511        | 1.600 Å | Miller J. J. Z. <i>Kristallogr.</i> <b>1936</b> , <i>94</i> , 131. Na <sub>2</sub> CrO <sub>4</sub>                                                                                                                                                                                                                                                                   |
| 30204         | 1.602 Å | Miller J. J. Z. <i>Kristallogr.</i> <b>1938</b> , <i>99</i> , 32. Cs <sub>2</sub> CrO <sub>4</sub>                                                                                                                                                                                                                                                                    |
| 30266         | 1.603 Å | Zachariasen, W. H.; Ziegler, G. E. <i>Z. Kristallogr.</i> <b>1931</b> , <i>80</i> , 164. K <sub>2</sub> CrO <sub>4</sub>                                                                                                                                                                                                                                              |
| 30224         | 1.606 Å | Smith, H. W.; Colby, M. Y. <i>Z. Kristallogr.</i> <b>1941</b> , 103, 90. Rb <sub>2</sub> CrO <sub>4</sub>                                                                                                                                                                                                                                                             |
| NEMPAW        | 1.606 Å | Wojciechowska, A.; Staszak, Z.; Bronowska, W.; Pietraszko, A.; Cieslak-Golonka, M. <i>Polyhedron</i> <b>2001</b> , <i>20</i> , 2063. [Zn(C <sub>10</sub> H <sub>8</sub> N <sub>2</sub> ) <sub>3</sub> ] CrO <sub>4</sub> ·7.5H <sub>2</sub> O                                                                                                                         |
| QIXPAO        | 1.618 Å | Maubert, B. M.; Nelson, J.; McKee, V.; Town, R. M.; Pal, I. <i>J. Chem. Soc., Dalton Trans.</i> <b>2001</b> , 1395. (C <sub>36</sub> H <sub>60</sub> N <sub>8</sub> )CrO <sub>4</sub> (ClO <sub>4</sub> ) <sub>4</sub> ·7H <sub>2</sub> O                                                                                                                             |
| CIMTAW        | 1.624 Å | Sukhikh, A. S.; Khrahenko, S. P.; Pishchur, D. P.; Gromilov, S. A. <i>J. Struct. Chem.</i> <b>2018</b> , <i>59</i> , 657. [Cu(H <sub>2</sub> N(CH <sub>2</sub> ) <sub>2</sub> NH <sub>2</sub> ) <sub>3</sub> ]CrO <sub>4</sub>                                                                                                                                        |
| 2732          | 1.625 Å | Khan, A. A.; Baur W. H. <i>Acta Crystallogr., Sect. B</i> <b>1972</b> , <i>28</i> , 683. NaNH <sub>4</sub> CrO <sub>4</sub> ·2H <sub>2</sub> O                                                                                                                                                                                                                        |
| CIMTAW02      | 1.627 Å | Sukhikh, A. S.; Khrahenko, S. P.; Pishchur, D. P.; Gromilov, S. A. <i>J. Struct. Chem.</i> <b>2018</b> , <i>59</i> , 657. [Cu(H <sub>2</sub> N(CH <sub>2</sub> ) <sub>2</sub> NH <sub>2</sub> ) <sub>3</sub> ]CrO <sub>4</sub>                                                                                                                                        |
| VADPUM        | 1.627 Å | Pietraszko, A.; Bronowska, W.; Wojciechowska, A.; Staszak, Z.; Cieslak-Golonka, M. <i>J. Pol. Chem.</i> <b>2002</b> , <i>76</i> , 309. [Ni(C <sub>10</sub> H <sub>8</sub> N <sub>2</sub> ) <sub>3</sub> ] CrO <sub>4</sub> ·7.5H <sub>2</sub> O                                                                                                                       |
| EHIHUY        | 1.628 Å | Wojciechowska, A.; Staszak, Z.; Bronowska, W.; Pietraszko, A.; Cieslak-Golonka, M. <i>J. Mol. Struct.</i> <b>2003</b> , <i>654</i> , 197. [Co(C <sub>10</sub> H <sub>8</sub> N <sub>2</sub> ) <sub>3</sub> ]CrO <sub>4</sub> (NO <sub>3</sub> ) <sub>2</sub> ·14H <sub>2</sub> O [Cr(OCN <sub>2</sub> H <sub>4</sub> ) <sub>6</sub> ].                                |
| JABVAN        | 1.629 Å | Chen, X.; Dai, X.; Xie, R.; Li, J.; Khayambashi, A.; Xu, L.; Yang, C.; Shen, N.; Wang, Y.; He, L.; Zhang, Y.; Xiao, C.; Chai, Z.; Wang, S. <i>Chin. Chem. Lett.</i> <b>2020</b> , <i>31</i> , 1974. (C <sub>10</sub> H <sub>16</sub> N <sub>8</sub> )CrO <sub>4</sub> ·2H <sub>2</sub> O                                                                              |
| OWORUO        | 1.629 Å | Liao, J.-H.; Chang, H.-W.; You, C.-H.; Fang, C.-S.; Liu, C. W. <i>Inorg. Chem.</i> <b>2011</b> , <i>50</i> , 2070. [Ag <sub>32</sub> C <sub>96</sub> H <sub>240</sub> O <sub>48</sub> P <sub>24</sub> S <sub>4</sub> ](CrO <sub>4</sub> ) <sub>2</sub> (PF <sub>6</sub> ) <sub>4</sub>                                                                                |
| VOBMII        | 1.629 Å | de Brauer, C.; Jannin, M.; Puget, R.; Perret, R. <i>Acta Crystallogr., Sect. C</i> <b>1991</b> , <i>47</i> , 2231. (C <sub>3</sub> H <sub>9</sub> OS) <sub>2</sub> CrO <sub>4</sub>                                                                                                                                                                                   |
| DIDNAJ        | 1.630 Å | Al Isawi, W. A.; Hartman, C. K.; Singh, P.; Zeller, M.; Mezei, G. <i>Inorg. Chem.</i> <b>2023</b> , <i>62</i> , 5716. (n-C <sub>4</sub> H <sub>9</sub> ) <sub>4</sub> N) <sub>2</sub> CrO <sub>4</sub> ·[Cu <sub>31</sub> C <sub>84</sub> H <sub>112</sub> N <sub>56</sub> O <sub>28</sub> ]·2.38C <sub>7</sub> H <sub>16</sub> ·3.95C <sub>6</sub> H <sub>5</sub> Cl |
| DIDNEN        | 1.630 Å | Al Isawi, W. A.; Hartman, C. K.; Singh, P.; Zeller, M.; Mezei, G. <i>Inorg. Chem.</i> <b>2023</b> , <i>62</i> , 5716. (n-C <sub>4</sub> H <sub>9</sub> ) <sub>4</sub> N) <sub>2</sub> CrO <sub>4</sub> ·[Cu <sub>31</sub> C <sub>93</sub> H <sub>124</sub> N <sub>62</sub> O <sub>31</sub> ]·1.31C <sub>6</sub> H <sub>14</sub> ·3.85C <sub>6</sub> H <sub>5</sub> Cl |
| 72550         | 1.632 Å | Makarova, I. P.; Verin, I. A.; Aleksandrov, K. S. <i>Acta Crystallogr., Sect. B</i> <b>1993</b> , <i>49</i> , 19. RbLiCrO <sub>4</sub>                                                                                                                                                                                                                                |

|        |         |                                                                                                                                                                                                                                                                                                                                                                                     |
|--------|---------|-------------------------------------------------------------------------------------------------------------------------------------------------------------------------------------------------------------------------------------------------------------------------------------------------------------------------------------------------------------------------------------|
| 280457 | 1.632 Å | Aleksovska, S.; Nyburg, S. C.; Pejov, L.; Petrusevski, V. M. <i>Acta Crystallogr., Sect. B</i> <b>1998</b> , <i>54</i> , 115. Rb <sub>2</sub> CrO <sub>4</sub>                                                                                                                                                                                                                      |
| MEVPIM | 1.632 Å | Chebbi, H.; Driss, A. <i>Acta Crystallogr., Sect. C</i> <b>2001</b> , <i>57</i> , 1369. (C <sub>9</sub> H <sub>22</sub> N <sub>2</sub> )CrO <sub>4</sub> ·2H <sub>2</sub> O                                                                                                                                                                                                         |
| DIDMUC | 1.634 Å | Al Isawi, W. A.; Hartman, C. K.; Singh, P.; Zeller, M.; Mezei, G. <i>Inorg. Chem.</i> <b>2023</b> , <i>62</i> , 5716. (n-C <sub>4</sub> H <sub>9</sub> ) <sub>4</sub> N) <sub>2</sub> CrO <sub>4</sub> ·[Cu <sub>28</sub> C <sub>93</sub> H <sub>124</sub> N <sub>62</sub> O <sub>31</sub> ] <sub>2</sub> ·3.05C <sub>5</sub> H <sub>12</sub> ·3.37C <sub>6</sub> H <sub>5</sub> Cl |
| KUJQAI | 1.634 Å | Bian, S.-D.; Wu, H.-B.; Wang, Q.-M. <i>Angew. Chem., Int. Ed.</i> <b>2009</b> , <i>48</i> , 5363. [Ag <sub>35</sub> C <sub>248</sub> H <sub>204</sub> N <sub>8</sub> ](CrO <sub>4</sub> ) <sub>2</sub> (BF <sub>4</sub> ) <sub>3</sub>                                                                                                                                              |
| DIDNIR | 1.635 Å | Al Isawi, W. A.; Hartman, C. K.; Singh, P.; Zeller, M.; Mezei, G. <i>Inorg. Chem.</i> <b>2023</b> , <i>62</i> , 5716. (n-C <sub>4</sub> H <sub>9</sub> ) <sub>4</sub> N) <sub>2</sub> CrO <sub>4</sub> ·[Cu <sub>31</sub> C <sub>93</sub> H <sub>124</sub> N <sub>62</sub> O <sub>31</sub> ] <sub>2</sub> ·5.11C <sub>5</sub> H <sub>12</sub>                                       |
| UQUXIP | 1.635 Å | Guchhait, T., Mani, G.; Schulzke, C. <i>Dalton Trans.</i> <b>2016</b> , <i>45</i> , 11781. (C <sub>32</sub> H <sub>48</sub> N <sub>6</sub> )CrO <sub>4</sub>                                                                                                                                                                                                                        |
| XUJDEL | 1.635 Å | Wojciechowska, A.; Bronowska, W.; Pietraszko, A.; Staszak, Z.; Cieslak-Golonka, M. <i>J. Mol. Struct.</i> <b>2002</b> , <i>608</i> , 309. [Zn(C <sub>10</sub> H <sub>8</sub> N <sub>2</sub> ) <sub>3</sub> ] <sub>2</sub> CrO <sub>4</sub> (NO <sub>3</sub> ) <sub>2</sub> ·13H <sub>2</sub> O                                                                                      |
| 88581  | 1.636 Å | Edwards, C. M.; Haines, J.; Butler, I. S.; Leger, J. M. <i>J. Phys. Chem. Solids</i> <b>1999</b> , <i>60</i> , 529. K <sub>2</sub> CrO <sub>4</sub>                                                                                                                                                                                                                                 |
| LEPSUU | 1.636 Å | Kotila, S.; Valkonen, J. <i>Acta Chem. Scand.</i> <b>1994</b> , <i>48</i> , 200. [Cu(C <sub>4</sub> H <sub>11</sub> N <sub>2</sub> O <sub>3</sub> )(C <sub>4</sub> H <sub>10</sub> N <sub>2</sub> O <sub>3</sub> )H <sub>2</sub> O] <sub>2</sub> CrO <sub>4</sub>                                                                                                                   |
| DIDNUD | 1.636 Å | Al Isawi, W. A.; Hartman, C. K.; Singh, P.; Zeller, M.; Mezei, G. <i>Inorg. Chem.</i> <b>2023</b> , <i>62</i> , 5716. (n-C <sub>4</sub> H <sub>9</sub> ) <sub>4</sub> N) <sub>2</sub> CrO <sub>4</sub> ·[Cu <sub>31</sub> C <sub>94</sub> H <sub>126</sub> N <sub>62</sub> O <sub>31</sub> ] <sub>2</sub> ·5.11C <sub>6</sub> H <sub>5</sub> NO <sub>2</sub> ·CH <sub>3</sub> OH    |
| 74557  | 1.637 Å | Fabry, J.; Breczewski, T.; Madariaga, G. <i>Acta Crystallogr., Sect. B</i> <b>1994</b> , <i>50</i> , 13. K <sub>3</sub> Na(CrO <sub>4</sub> ) <sub>2</sub>                                                                                                                                                                                                                          |
| 40945  | 1.638 Å | Klevtsov, P. V.; Perepelitsa, A. P.; Ishchenko, V. N.; Klevtsova, R.F.; Glinskaya, L. A.; Kruglik, A. I.; Aleksandrov, K. S.; Simonov, M. A. <i>Kristallografiya</i> <b>1989</b> , <i>34</i> , 147. CsLiCrO <sub>4</sub>                                                                                                                                                            |
| 110041 | 1.638 Å | Abrahams, B. F.; Haywood, M. G.; Hudson, T. A.; Robson, R. <i>Angew. Chem., Int. Ed.</i> <b>2004</b> , <i>43</i> , 6157. (CH <sub>3</sub> ) <sub>4</sub> N(C(NH <sub>2</sub> ) <sub>3</sub> ) <sub>2</sub> CrO <sub>4</sub>                                                                                                                                                         |
| FAQCEG | 1.638 Å | Abrahams, B. F.; Haywood, M. G.; Hudson, T. A.; Robson, R. <i>Angew. Chem., Int. Ed.</i> <b>2004</b> , <i>43</i> , 6157. (C <sub>4</sub> H <sub>12</sub> N)(CH <sub>6</sub> N <sub>3</sub> )CrO <sub>4</sub>                                                                                                                                                                        |
| 34766  | 1.639 Å | Ruben, H.; Olovsson, I.; Zalkin, A.; Templeton, D. H. <i>Acta Crystallogr., Sect. B</i> <b>1973</b> , <i>29</i> , 2963. Na <sub>2</sub> CrO <sub>4</sub> ·2H <sub>2</sub> O                                                                                                                                                                                                         |
| 63415  | 1.639 Å | Aleksandrov, K. S.; Mel'nikova, S. V.; Kruglik, A. I.; Tret'yak, S. M.; Mitkevich, V. V. <i>Kristallografiya</i> <b>1989</b> , <i>34</i> , 147. CsLiCrO <sub>4</sub>                                                                                                                                                                                                                |
| 68464  | 1.639 Å | Madariaga, G.; Breczewski, T. <i>Acta Crystallogr., Sect. C</i> <b>1990</b> , <i>46</i> , 2019. K <sub>3</sub> Na(CrO <sub>4</sub> ) <sub>2</sub>                                                                                                                                                                                                                                   |
| 74558  | 1.639 Å | Fabry, J.; Breczewski, T.; Madariaga, G. <i>Acta Crystallogr., Sect. B</i> <b>1994</b> , <i>50</i> , 13. K <sub>3</sub> Na(CrO <sub>4</sub> ) <sub>2</sub>                                                                                                                                                                                                                          |
| 39403  | 1.640 Å | Makarova, I. I.; Aleksandrov, K. S.; Vasil'ev, A. D.; Kruglik, A. I.; Simonov, V. I. <i>Kristallografiya</i> <b>1991</b> , <i>36</i> , 326. RbLiCrO <sub>4</sub>                                                                                                                                                                                                                    |
| 72547  | 1.640 Å | Makarova, I. P.; Verin, I. A.; Aleksandrov, K. S. <i>Acta Crystallogr., Sect. B</i> <b>1993</b> , <i>49</i> , 19. RbLiCrO <sub>4</sub>                                                                                                                                                                                                                                              |

|          |         |                                                                                                                                                                                                                                                                                                                           |
|----------|---------|---------------------------------------------------------------------------------------------------------------------------------------------------------------------------------------------------------------------------------------------------------------------------------------------------------------------------|
| RUYUIU   | 1.641 Å | Wojciechowska, A.; Pietraszko, A.; Bronowska, W.; Staszak, Z.; Jezierska, J.; Cieslak-Golonkam, M. <i>Polyhedron</i> <b>2010</b> , <i>29</i> , 2574. [Cu(N <sub>2</sub> C <sub>10</sub> H <sub>10</sub> ) <sub>3</sub> ]CrO <sub>4</sub> ·7.5·H <sub>2</sub> O                                                            |
| 74559    | 1.642 Å | Fabry, J.; Breczewski, T.; Madariaga, G. <i>Acta Crystallogr., Sect. B</i> <b>1994</b> , <i>50</i> , 13. K <sub>3</sub> Na(CrO <sub>4</sub> ) <sub>2</sub>                                                                                                                                                                |
| 2828     | 1.643 Å | M <sup>c</sup> Ginnety, J. A. <i>Acta Crystallogr., Sect. B</i> <b>1972</b> , <i>28</i> , 2845. K <sub>2</sub> CrO <sub>4</sub>                                                                                                                                                                                           |
| 201236   | 1.643 Å | Figgis, B. N.; Skelton, B. W.; White, A. H. <i>Aust. J. Chem.</i> <b>1979</b> , <i>32</i> , 417. [Co(NH <sub>3</sub> ) <sub>6</sub> ]CrO <sub>4</sub> Cl·3H <sub>2</sub> O                                                                                                                                                |
| CIMTAW01 | 1.643 Å | Sukhikh, A. S.; Khranenko, S. P.; Pishchur, D. P.; Gromilov, S. A. <i>J. Struct. Chem.</i> <b>2018</b> , <i>59</i> , 657. [Cu(H <sub>2</sub> N(CH <sub>2</sub> ) <sub>2</sub> NH <sub>2</sub> ) <sub>3</sub> ]CrO <sub>4</sub>                                                                                            |
| 16047    | 1.645 Å | Stephens, J. S.; Cruickshank, D. W. J. <i>Acta Crystallogr., Sect. B</i> <b>1970</b> , <i>26</i> , 437. (NH <sub>4</sub> ) <sub>2</sub> CrO <sub>4</sub>                                                                                                                                                                  |
| 34776    | 1.645 Å | Cygler, M.; Grabowski, M. J.; Stepień, A.; Wajzman, E. <i>Acta Crystallogr., Sect. B</i> <b>1976</b> , <i>32</i> , 2391. (C(NH <sub>2</sub> ) <sub>3</sub> ) <sub>2</sub> CrO <sub>4</sub>                                                                                                                                |
| 78991    | 1.645 Å | Barlage, H.; Jacobs, H. Z. <i>Anorg. Allg. Chem.</i> <b>1996</b> , <i>622</i> , 721. Li <sub>2</sub> CrO <sub>4</sub> ·2H <sub>2</sub> O                                                                                                                                                                                  |
| 280978   | 1.645 Å | Kolitsch, U. <i>Acta Crystallogr., Sect. E</i> <b>2002</b> , <i>58</i> , 88. K <sub>4</sub> CrO <sub>4</sub> (NO <sub>3</sub> ) <sub>2</sub>                                                                                                                                                                              |
| GUACRO10 | 1.645 Å | Cygler, M.; Grabowski, M. J.; Stepień, A.; Wajzman, E. <i>Acta Crystallogr., Sect. B</i> <b>1976</b> , <i>32</i> , 2391. (CH <sub>6</sub> N <sub>3</sub> ) <sub>2</sub> CrO <sub>4</sub>                                                                                                                                  |
| PADBAY   | 1.645 Å | Nelson, J.; Nieuwenhuyzen, M.; Pal, I.; Town, R. M. <i>Dalton Trans.</i> <b>2004</b> , 2303. (C <sub>30</sub> H <sub>54</sub> N <sub>8</sub> O <sub>3</sub> )CrO <sub>4</sub> (ClO <sub>4</sub> ) <sub>4</sub> ·6H <sub>2</sub> O                                                                                         |
| 26330    | 1.646 Å | Nimmo, J. K. <i>Acta Crystallogr., Sect. B</i> <b>1981</b> , <i>37</i> , 431. Na <sub>2</sub> CrO <sub>4</sub>                                                                                                                                                                                                            |
| 34794    | 1.646 Å | Montgomery, H. <i>Acta Crystallogr., Sect. B</i> <b>1979</b> , <i>35</i> , 155. (H <sub>4</sub> N) <sub>2</sub> [Ni(H <sub>2</sub> O) <sub>6</sub> ](CrO <sub>4</sub> ) <sub>2</sub>                                                                                                                                      |
| 72997    | 1.646 Å | Laligant, Y. <i>Eur. J. Solid State Inorg. Chem.</i> <b>1993</b> , <i>30</i> , 681. [Pd(NH <sub>3</sub> ) <sub>4</sub> ]CrO <sub>4</sub>                                                                                                                                                                                  |
| 300003   | 1.646 Å | Hodgson, P. G.; Montgomery, H.; Moore, F. H.; Smith, G.; Eggins, R.; Kennard, C. H. L. <i>Crystal Struct. Commun.</i> <b>1978</b> , <i>7</i> , 127. (NH <sub>4</sub> ) <sub>2</sub> [Ni(H <sub>2</sub> O) <sub>6</sub> ](CrO <sub>4</sub> ) <sub>2</sub>                                                                  |
| FAWLOF   | 1.646 Å | Hyoung-Sil Moon, Chong-Hyeak Kim, Sueg-Geun Lee <i>J. Coord. Chem.</i> <b>2004</b> , <i>57</i> , 1425. (C <sub>6</sub> H <sub>11</sub> NH <sub>3</sub> ) <sub>2</sub> CrO <sub>4</sub>                                                                                                                                    |
| XUXKIM   | 1.646 Å | Custelcean, R.; Bonnesen, P. V.; Duncan, N. C.; Zhang, X.; Watson, L. A.; Van Berkel, G.; Parson, W. B.; Hay, B. P. <i>J. Am. Chem. Soc.</i> <b>2012</b> , <i>134</i> , 8525. [Zn <sub>4</sub> C <sub>186</sub> H <sub>216</sub> N <sub>36</sub> O <sub>6</sub> ]CrO <sub>4</sub> ·3CH <sub>3</sub> OH·16H <sub>2</sub> O |
| 2402     | 1.647 Å | Toriumi, K.; Saito, Y. <i>Acta Crystallogr., Sect. B</i> <b>1978</b> , <i>34</i> , 3149. K <sub>2</sub> CrO <sub>4</sub>                                                                                                                                                                                                  |
| 110979   | 1.637 Å | Dumbrava, A.; Maxim, C.; Olar, R.; Badea, M.; Stefan, M.; Nicoleta Grecu, M.; Andruh, M. <i>Inorg. Chim Acta</i> <b>2020</b> , <i>509</i> , 119663. [Cu(NH <sub>3</sub> ) <sub>4</sub> ]CrO <sub>4</sub>                                                                                                                  |
| 424199   | 1.647 Å | Kahlenberg, V. Z. <i>Kristallogr. – Crystal. Mater.</i> <b>2012</b> , <i>227</i> , 621. Na <sub>2</sub> CrO <sub>4</sub> ·10H <sub>2</sub> O                                                                                                                                                                              |
| OJEVII   | 1.647 Å | Srinivasan, B. R.; Nather, C.; Bensch, W. <i>Acta Crystallogr., Sect. E</i> <b>2003</b> , <i>59</i> , m639. (C <sub>4</sub> H <sub>12</sub> N <sub>2</sub> )CrO <sub>4</sub>                                                                                                                                              |
| 63416    | 1.648 Å | Aleksandrov, K. S.; Mel'nikova, S. V.; Kruglik, A. I.; Tret'yak, S. M.; Mitkevich, V. V. <i>Kristallografiya</i> <b>1989</b> , <i>34</i> , 147. CsLiCrO <sub>4</sub>                                                                                                                                                      |
| YABVAB   | 1.648 Å | Moon, D.; Cho, C.-H. <i>Acta Crystallogr., Sect. E</i> <b>2016</b> , <i>72</i> , 1872. C <sub>6</sub> H <sub>8</sub> (NH <sub>3</sub> ) <sub>2</sub> CrO <sub>4</sub>                                                                                                                                                     |

|             |                              |                                                                                                                                                                                                                                                                   |
|-------------|------------------------------|-------------------------------------------------------------------------------------------------------------------------------------------------------------------------------------------------------------------------------------------------------------------|
| 300021      | 1.650 Å                      | Morris, A. J.; Kennard, C. H. L.; Moore, F. H.; Smith, G.; Montgomery, H. <i>Crystal Struct. Commun.</i> <b>1981</b> , <i>10</i> , 529. Cs <sub>2</sub> CrO <sub>4</sub>                                                                                          |
| 48111       | 1.651 Å                      | Montgomery, H. <i>Acta Crystallogr., Sect. C</i> <b>1984</b> , <i>40</i> , 14. Cs <sub>2</sub> [Mg(H <sub>2</sub> O) <sub>6</sub> ](CrO <sub>4</sub> ) <sub>2</sub>                                                                                               |
| 138774      | 1.651 Å                      | Griesemer, S. D.; Ward, L.; Wolverton, C. <i>Phys. Rev. Mater.</i> <b>2021</b> , <i>5</i> , 105003. CsLiCrO <sub>4</sub>                                                                                                                                          |
| MOCRUU      | 1.651 Å                      | Trabelsi, S.; Issaoui, N.; Brandan, S. A.; Bardak, F.; Roisnel, T.; Atac, A.; Marouani, H. <i>J. Mol. Struct.</i> <b>2019</b> , <i>1185</i> , 168. (C <sub>6</sub> H <sub>5</sub> (CH <sub>2</sub> ) <sub>2</sub> NH <sub>3</sub> ) <sub>2</sub> CrO <sub>4</sub> |
| 65005       | 1.652 Å                      | Klevtsova, R. F.; Glinskaya, L. A.; Klevtsov, P. V.; Perepelitsa, A. P.; Ishchenko, V. N.; Kruglik, A. I.; Aleksandrov, K. S. <i>Kristallografiya</i> <b>1988</b> , <i>33</i> , 630. KLiCrO <sub>4</sub>                                                          |
| IWUZAB01    | 1.652 Å                      | Srinivasan, B. R.; Dhuri, S. N.; Nather, C.; Bensch, W. <i>Indian J. Chem., Sect. A</i> <b>2003</b> , <i>42</i> , 2735. (H <sub>3</sub> N(CH <sub>2</sub> ) <sub>2</sub> NH <sub>3</sub> )CrO <sub>4</sub>                                                        |
| WOBVUE      | 1.652 Å                      | Chebbi, H.; Hajem, A. A.; Driss, A. <i>Acta Crystallogr., Sect. C</i> <b>2000</b> , <i>56</i> , e333. (C <sub>5</sub> H <sub>16</sub> N <sub>2</sub> )CrO <sub>4</sub>                                                                                            |
| MOCROL      | 1.653 Å                      | Chebbi, H.; Driss, A. <i>Acta Crystallogr., Sect. E</i> <b>2002</b> , <i>58</i> , m147. (C <sub>4</sub> H <sub>14</sub> N <sub>2</sub> )CrO <sub>4</sub>                                                                                                          |
| 1972        | 1.654 Å                      | Brown, I. D.; Faggiani, R. <i>Acta Crystallogr., Sect. B</i> <b>1975</b> , <i>31</i> , 2364. Li <sub>2</sub> CrO <sub>4</sub>                                                                                                                                     |
| NIXSUK      | 1.654 Å                      | Trabelsi, S.; Essid, M.; Roisnel, T.; Rzaigui, M.; Marouani, H. <i>Acta Crystallogr., Sect. E</i> <b>2014</b> , <i>70</i> , m84. (H <sub>3</sub> NCH(CH <sub>3</sub> )CH <sub>2</sub> NH <sub>3</sub> )CrO <sub>4</sub>                                           |
| IWUZAB      | 1.656 Å                      | Chebbi, H.; Driss, A. <i>Acta Crystallogr., Sect. E</i> <b>2004</b> , <i>60</i> , m904. (H <sub>3</sub> N(CH <sub>2</sub> ) <sub>2</sub> NH <sub>3</sub> )CrO <sub>4</sub>                                                                                        |
| 63417       | 1.657 Å                      | Aleksandrov, K. S.; Mel'nikova, S. V.; Kruglik, A. I.; Tret'yak, S. M.; Mitkevich, V. V. <i>Kristallografiya</i> <b>1989</b> , <i>34</i> , 147. CsLiCrO <sub>4</sub>                                                                                              |
| RARXOB      | 1.657 Å                      | Sperlich, E.; Kockerling, M. <i>Chemistry Open</i> <b>2021</b> , <i>10</i> , 248. [Nb <sub>6</sub> C <sub>18</sub> H <sub>24</sub> Cl <sub>12</sub> N <sub>12</sub> ]CrO <sub>4</sub> ·2C <sub>3</sub> H <sub>4</sub> N <sub>2</sub> ·2CH <sub>3</sub> OH         |
| 138627      | 1.659 Å                      | Griesemer, S. D.; Ward, L.; Wolverton, C. <i>Phys. Rev. Mater.</i> <b>2021</b> , <i>5</i> , 105003. KNaCrO <sub>4</sub>                                                                                                                                           |
| 138658      | 1.660 Å                      | Griesemer, S. D.; Ward, L.; Wolverton, C. <i>Phys. Rev. Mater.</i> <b>2021</b> , <i>5</i> , 105003. K <sub>2</sub> CrO <sub>4</sub>                                                                                                                               |
| 138661      | 1.661 Å                      | Griesemer, S. D.; Ward, L.; Wolverton, C. <i>Phys. Rev. Mater.</i> <b>2021</b> , <i>5</i> , 105003. Rb <sub>2</sub> BaCrO <sub>4</sub>                                                                                                                            |
| 138669      | 1.661 Å                      | Griesemer, S. D.; Ward, L.; Wolverton, C. <i>Phys. Rev. Mater.</i> <b>2021</b> , <i>5</i> , 105003. Rb <sub>2</sub> Sr(CrO <sub>4</sub> ) <sub>2</sub>                                                                                                            |
| VURRAC      | 1.662 Å                      | Ou, G.-C.; Jiang, L.; Feng, X.-L.; Lu, T.-B. <i>Sci. China., Ser B</i> <b>2009</b> , <i>52</i> , 465. [NiC <sub>16</sub> H <sub>36</sub> N <sub>4</sub> ] <sub>3</sub> (ClO <sub>4</sub> ) <sub>2</sub> (CrO <sub>4</sub> ) <sub>2</sub> ·4H <sub>2</sub> O       |
| 16120       | 1.663 Å                      | Gatehouse, B. M.; Leverett, P. <i>J. Chem. Soc. A</i> <b>1969</b> , 1857. (NH <sub>4</sub> ) <sub>2</sub> CrO <sub>4</sub>                                                                                                                                        |
| 247477      | 1.666 Å                      | Fabry, J.; Dusek, M.; Fejfarova, K.; Krupkova, R.; Vanek, P. <i>Acta Crystallogr., Sect. C</i> <b>2010</b> , <i>66</i> , i45. Tl <sub>2</sub> CrO <sub>4</sub>                                                                                                    |
| 9399        | 1.680 Å                      | Carter, R. L.; Margulis, T. N. <i>J. Solid State Chem.</i> <b>1972</b> , <i>5</i> , 75. Tl <sub>2</sub> CrO <sub>4</sub>                                                                                                                                          |
| <b>Mean</b> | <b>1.643 Å/75 structures</b> |                                                                                                                                                                                                                                                                   |



**Structure of Cr<sub>2</sub>O<sub>7</sub><sup>2-</sup>**ICSD/CSD code *d*(Cr-O<sub>t</sub>+Cr-O<sub>b</sub>;Cr...Cr)

OJATEA 1.537+1.817; 3.217 Å

OJATEA01 1.532+1.793; 3.224 Å

YIKJOT 1.548+1.777; 3.266 Å

ZAWWOJ 1.559+1.761; 3.116 Å

WAGGAM 1.567+1.777; 3.198 Å

JIVQIO 1.568+1.751; 3.179 Å

XAZDUO 1.569+1.757; 3.299 Å

281584 1.581+1.756; 3.163 Å

CUNZUG 1.590+1.772; 3.226 Å

IRETEF 1.590+1.774; 3.226 Å

16181 1.591+1.956, 3.026 Å

HAFJII 1.592+1.790; 3.149 Å

HAFJII 1.592+1.790; 3.149 Å

WADJIV 1.592+1.798; 3.324 Å

ZZZAYY01 1.592+1.748; 3.395 Å

INAZEC 1.593+1.753; 3.163 Å

INAZEC01 1.593+1.753; 3.163 Å

HMTCRC10 1.595+1.764; 3.184 Å

**Reference**Shi, P.-P. Ye, Q.; Wang, H.-T.; Li, Q.; Fu, D.-W.; Zhang, Y. *Eur. J. Inorg. Chem.* **2015**, 3255.((CH<sub>3</sub>)<sub>4</sub>P)<sub>2</sub>Cr<sub>2</sub>O<sub>7</sub>Li, X.; Xu, H.; Kong, F.; Wang, R. *Angew. Chem., Int. Ed.* **2013**, 52, 13769.[Ag<sub>2</sub>C<sub>8</sub>H<sub>8</sub>N<sub>12</sub>]Cr<sub>2</sub>O<sub>7</sub>·H<sub>2</sub>OBenetollo, F.; Bombieri, G.; Gilli, P.; Harlow, P. M.; Polo, A., Vallarino, L. M. *Polyhedron* **1995**, 14, 2255. [CrSmC<sub>22</sub>H<sub>28</sub>N<sub>6</sub>O<sub>5</sub>]<sub>2</sub>Cr<sub>2</sub>O<sub>7</sub>·2H<sub>2</sub>OJannin, M.; Puget, R.; de Brauer, C.; Perret, R. *Acta Crystallogr., Sect. C* **1993**, 49, 749.((CH<sub>3</sub>)<sub>3</sub>SO<sub>3</sub>)<sub>2</sub>(Cr<sub>2</sub>O<sub>7</sub>)Fosse, N.; Caldes, M.; Joubert, O.; Ganne, M.; Brohan, L. *J. Solid State Chem.* **1998**, 139, 310. ((CH<sub>3</sub>)<sub>3</sub>C<sub>18</sub>H<sub>39</sub>N)<sub>2</sub>Cr<sub>2</sub>O<sub>7</sub>.Li, C.-P.; Zhou, H.; Wang, S.; Chen, J.; Wang, Z.-L.; Du, M. *Chem. Commun.* **2017**, 53, 9206. [AgC<sub>17</sub>H<sub>12</sub>N<sub>6</sub>]<sub>2</sub>Cr<sub>2</sub>O<sub>7</sub>·2CH<sub>3</sub>CNDagur, P.; Chopra, D.; Prakash, A.; Guru Row, T.N.; Hegde, M. S. *Acta Crystallogr., Sect. E* **2003**, 59, m1129. [Ni(H<sub>2</sub>O)<sub>6</sub>]Cr<sub>2</sub>O<sub>7</sub>·2((CH<sub>2</sub>)<sub>6</sub>N<sub>4</sub>)·H<sub>2</sub>O.J.-K.Tang, E.-Q.Gao, D.-Z.Liao, Z.-H.Jiang, S.-P.Yan *Pol. J. Chem.* **2000**, 74, 137.[Ni(C<sub>12</sub>H<sub>8</sub>N<sub>2</sub>)]Cr<sub>2</sub>O<sub>7</sub>·3H<sub>2</sub>O.Padhi, S. K.; Sahu, R.; Saha, D.; Manivannan, V. *Inorg. Chim. Acta* **2011**, 372, 383.(C<sub>10</sub>H<sub>28</sub>N<sub>4</sub>)(Cr<sub>2</sub>O<sub>7</sub>)<sub>2</sub>Datt, I. D.; Rannev, N. V.; Balicheva, T. G.; Ozerov, R. P. *Kristallografiya* **1970**, 15, 949.Li<sub>2</sub>Cr<sub>2</sub>O<sub>7</sub>·2H<sub>2</sub>OCameron, T. S.; Clyburne, J. A. C.; Dubey, P. K.; Grossert, J. S.; Ramaiah, K.; Ramanatham, J.; Sareda, S. V. *Can. J. Chem.* **2003**, 81, 612. (C<sub>10</sub>H<sub>13</sub>N)<sub>2</sub>Cr<sub>2</sub>O<sub>7</sub>.Ramaiah, K.; Dubey, P. K.; Ramanatham, J.; Kumar, C. R.; Grossert, J. S.; Cameron, T. S.; Sareda, S. V. *Indian J. Chem., Sect. B* **2002**, 41, 2136. (C<sub>10</sub>H<sub>13</sub>N)<sub>2</sub>Cr<sub>2</sub>O<sub>7</sub>.Sundar, T. V.; Parthasarathi, V.; Thamocharan, S.; Sekar, K. G. *Acta Crystallogr., Sect. E* **2003**, 59, m327. (C<sub>9</sub>H<sub>8</sub>N)<sub>2</sub>Cr<sub>2</sub>O<sub>7</sub>.Fosse, N.; Joubert, O.; Ganne, M.; Brohan, L. *Solid State Sci.* **2001**, 3, 121. (C<sub>4</sub>H<sub>12</sub>N)<sub>2</sub>Cr<sub>2</sub>O<sub>7</sub>.Dagur, P.; Chopra, D.; Prakash, A. S.; Row, T. N. G.; Hegde, M. S. *Acta Crystallogr., Sect. E* **2003**, 59, m1129; *J. Crystal Growth* **2005**, 275, e2043. [Ni(H<sub>2</sub>O)<sub>6</sub>]Cr<sub>2</sub>O<sub>7</sub>·2C<sub>6</sub>H<sub>12</sub>N<sub>4</sub>·H<sub>2</sub>O.Dahan, F. *Acta Crystallogr., Sect. B* **1975**, 31, 423. Ca(C<sub>6</sub>H<sub>12</sub>N<sub>4</sub>)<sub>2</sub>Cr<sub>2</sub>O<sub>7</sub>·7H<sub>2</sub>O.



|          |                      |                                                                                                                                                                                                                                                                                                            |
|----------|----------------------|------------------------------------------------------------------------------------------------------------------------------------------------------------------------------------------------------------------------------------------------------------------------------------------------------------|
| SINHAZ   | 1.595+1.775; 3.321 Å | Jin, Y.; Che, Y. X.; Zheng, J. M. <i>Inorg. Chem. Commun.</i> <b>2007</b> , <i>10</i> , 514.<br>[Ni(N <sub>2</sub> C <sub>12</sub> H <sub>8</sub> ) <sub>3</sub> ]Cr <sub>2</sub> O <sub>7</sub> ·5H <sub>2</sub> O                                                                                        |
| DULTEK   | 1.596+1.770; 3.227 Å | Liu, H.-X. <i>Acta Crystallogr. Sect. E</i> <b>2010</b> , <i>66</i> , m144. [Ni(C <sub>12</sub> H <sub>8</sub> N <sub>2</sub> ) <sub>3</sub> ]Cr <sub>2</sub> O <sub>7</sub> ·4H <sub>2</sub> O                                                                                                            |
| MUBWUC   | 1.596+1.756; 3.186 Å | Liu, H.-X.; Dong, G.-Y.; Ma, Z.-H.; Cui, G.-H. <i>Acta Crystallogr., Sect. E</i> <b>2009</b> , <i>65</i> , m1026.<br>[Mg(H <sub>2</sub> O) <sub>2</sub> (N <sub>2</sub> C <sub>12</sub> H <sub>8</sub> ) <sub>2</sub> ]Cr <sub>2</sub> O <sub>7</sub> ·2C <sub>12</sub> H <sub>8</sub> N <sub>2</sub>      |
| ZEFNAZ   | 1.596+1.779; 3.299 Å | Park, J. T.; Nishioka, T.; Suzuki, T.; Isobe, K. <i>Bull. Chem. Soc. Jpn.</i> <b>1994</b> , <i>67</i> , 1968.<br>[Ir <sub>2</sub> C <sub>20</sub> H <sub>33</sub> O <sub>3</sub> ] <sub>2</sub> Cr <sub>2</sub> O <sub>7</sub> ·8H <sub>2</sub> O                                                          |
| 15033    | 1.597+1.796; 3.155 Å | Löfgren, P. <i>Acta Chem. Scand.</i> <b>1971</b> , <i>25</i> , 44. Rb <sub>2</sub> Cr <sub>2</sub> O <sub>7</sub>                                                                                                                                                                                          |
| 34326    | 1.597+1.792; 3.177 Å | Kuzmin, E. A.; Ilyukhin, V. V.; Kharitonov, Y. A.; Belov, N. V. <i>Krist. Technik</i> <b>1969</b> , <i>4</i> , 441.                                                                                                                                                                                        |
| 166635   |                      | Kuzmin, E. A.; Ilyukhin, V. V.; Belov, N. V. <i>Dokl. Acad. SSSR</i> <b>1967</b> , <i>173</i> , 1068. K <sub>2</sub> Cr <sub>2</sub> O <sub>7</sub>                                                                                                                                                        |
| EDUQIE   | 1.597+1.762; 3.188 Å | Smail, R. B.; Chebbi, H.; Driss, A. <i>Acta Crystallogr. Sect. E</i> <b>2010</b> , <i>66</i> , m144. <i>Acta Crystallogr. Sect. E</i> <b>2007</b> , <i>63</i> , m859. (H <sub>3</sub> N(CH <sub>2</sub> ) <sub>2</sub> NH <sub>3</sub> ) <sub>2</sub> (CrO <sub>4</sub> )(Cr <sub>2</sub> O <sub>7</sub> ) |
| EFIWOF   | 1.597+1.775; 3.222 Å | Ejismont, K.; Wasielewski, M.; Zaleski, J. <i>Acta Crystallogr., Sect. E</i> <b>2002</b> , <i>58</i> , m200.<br>[Zn(C <sub>12</sub> H <sub>8</sub> N <sub>2</sub> ) <sub>3</sub> ]Cr <sub>2</sub> O <sub>7</sub> ·4H <sub>2</sub> O.                                                                       |
| ISAPAV   | 1.597+1.749; 3.445 Å | Moon, D.; Ryoo, K. S.; Choi, J.-H. <i>Acta Crystallogr., Sect. E</i> <b>2016</b> , <i>72</i> , 1293.<br>[FeC <sub>6</sub> H <sub>20</sub> N <sub>4</sub> Cl <sub>2</sub> ]Cr <sub>2</sub> O <sub>7</sub>                                                                                                   |
| GUANDC01 | 1.597+1.789; 3.161 Å | Stepien, A.; Wajsman, E.; Cygler, M.; Grabowski, M. J. <i>Rocz. Chem</i> <b>1976</b> , <i>50</i> , 1587.<br>(CH <sub>6</sub> N) <sub>2</sub> Cr <sub>2</sub> O <sub>7</sub> .                                                                                                                              |
| YAFFOC   | 1.599+1.760; 3.429 Å | Jin, L.; Liu, N. <i>Acta Crystallogr., Sect. E</i> <b>2011</b> , <i>67</i> , m1586. ((CH <sub>3</sub> ) <sub>3</sub> CH <sub>2</sub> C <sub>6</sub> H <sub>5</sub> N) <sub>2</sub> (Cr <sub>2</sub> O <sub>7</sub>                                                                                         |
| 20947    | 1.600+1.780; 3.235 Å | Bondar, V. I.; Rozman, S. P.; Potekhin, K. A.; Rau, V. G.; Struchkov, Y. T. <i>Dokl. Akad. Nauk SSSR</i> <b>1984</b> , <i>279</i> , 373. [Cr(OCN <sub>2</sub> H <sub>4</sub> ) <sub>6</sub> ](Cr <sub>2</sub> O <sub>7</sub> )Cl·H <sub>2</sub> O                                                          |
| VENRAI   | 1.600+1.773; 3.220 Å | Khadhrani, H.; Smail, R. B.; Driss, A. <i>C. R. Chim.</i> <b>2006</b> , <i>9</i> , 1322.<br>(C <sub>6</sub> H <sub>18</sub> N <sub>2</sub> ) <sub>3</sub> (C <sub>2</sub> O <sub>4</sub> )(Cr <sub>2</sub> O <sub>7</sub> ) <sub>24</sub> ·H <sub>2</sub> O.                                               |
| HAFJAA   | 1.601+1.774; 3.266 Å | Ramaiah, K.; Dubey, P. K.; Ramanatham, J.; Kumar, C. R.; Grossert, J. S.; Cameron, T. S.; Sareda, S. V. <i>Indian J. Chem., Sect. B</i> <b>2002</b> , <i>41</i> , 2136. (C <sub>9</sub> H <sub>11</sub> N) <sub>2</sub> Cr <sub>2</sub> O <sub>7</sub> .                                                   |
| POFMUU   | 1.601+1.752; 3.373 Å | Liu, H.-X. <i>Z. Kristallogr. New Cryst. Struct.</i> <b>2009</b> , <i>224</i> , 717. (C <sub>14</sub> H <sub>13</sub> N <sub>2</sub> ) <sub>2</sub> (Cr <sub>2</sub> O <sub>7</sub> )·2H <sub>2</sub> O                                                                                                    |
| MUGFIE   | 1.602+1.780; 3.205 Å | Srinivasan, B. R.; Naik, A. R.; Nather, C.; Pausch, H.; Bensch, W. <i>J. Coord. Chem.</i> <b>2009</b> , <i>62</i> , 3583. [Ni(H <sub>2</sub> N(CH <sub>2</sub> ) <sub>2</sub> NH <sub>2</sub> ) <sub>3</sub> ]Cr <sub>2</sub> O <sub>7</sub>                                                               |
| UQUXOV   | 1.602+1.767; 3.080 Å | Guchhait, T.; Mani, G.; Schulzke, C. <i>Dalton Trans.</i> <b>2016</b> , <i>45</i> , 11781. (C <sub>32</sub> H <sub>48</sub> N <sub>6</sub> )Cr <sub>2</sub> O <sub>7</sub> ·9H <sub>2</sub> O                                                                                                              |
| HAFJEE02 | 1.603+1.790; 3.230 Å | Qinghua Meng, Wenfan Yan, Shi Xu, Deyin Huang <i>J. Chem. Cryst.</i> <b>2004</b> , <i>34</i> , 333.<br>(C <sub>7</sub> H <sub>7</sub> N) <sub>2</sub> Cr <sub>2</sub> O <sub>7</sub> .                                                                                                                     |
| MEBLEL   | 1.603+1.793; 3.189 Å | Khadhrani, H.; Smail, R. B.; Driss, A.; Jouini, T. <i>Acta Crystallogr., Sect. E</i> <b>2006</b> , <i>62</i> , m146.;<br>(C <sub>6</sub> H <sub>18</sub> N <sub>2</sub> )Cr <sub>2</sub> O <sub>7</sub> ·H <sub>2</sub> O.                                                                                 |

|          |                      |                                                                                                                                                                                                                                                                       |
|----------|----------------------|-----------------------------------------------------------------------------------------------------------------------------------------------------------------------------------------------------------------------------------------------------------------------|
| PEDWIG   | 1.603+1.779; 3.212 Å | Bala, R.; Kashyap, M.; Kaur, A.; Golobic, A. <i>J. Mol. Struct.</i> <b>2013</b> , <i>1031</i> , 246. [Cr(OC(NH <sub>2</sub> ) <sub>2</sub> ) <sub>6</sub> ]Cr <sub>2</sub> O <sub>7</sub> .                                                                           |
| YIMKEL   | 1.603+1.779; 3.254 Å | Bock, H.; Nather, C.; John, A.; Nick, S.; Ruppert, K. CDCC deposit number 226885, <b>2007</b> .                                                                                                                                                                       |
| XAZBAC   | 1.604+1.827; 3.325 Å | Sharma, R. P.; Sharma, .; Bala, R.; Salas, J. M.; Quiros, M. <i>J. Chem. Cryst.</i> <b>2005</b> , <i>35</i> , 769. [Co(H <sub>2</sub> N(CH <sub>2</sub> ) <sub>2</sub> NH <sub>2</sub> ) <sub>2</sub> (H <sub>2</sub> O) <sub>2</sub> ]Cr <sub>2</sub> O <sub>7</sub> |
| HAFJEE   | 1.605+1.795; 3.243 Å | Ramaiah, K.; Dubey, P. K.; Ramanatham, J.; Kumar, C. R.; Grossert, J. S.; Cameron, T. S.; Sareda, S. V. <i>Indian J. Chem., Sect. B</i> <b>2002</b> , <i>41</i> , 2136. (C <sub>7</sub> H <sub>7</sub> N) <sub>2</sub> Cr <sub>2</sub> O <sub>7</sub> .               |
| QOLHOP   | 1.605+1.760; 3.398 Å | Akriche, S.; Rzaigui, M. <i>Acta Crystallogr., Sect. E</i> <b>2009</b> , <i>65</i> , m123. (C <sub>5</sub> H <sub>6</sub> N <sub>3</sub> O) <sub>2</sub> Cr <sub>2</sub> O <sub>7</sub>                                                                               |
| REYJOX   | 1.605+1.788; 3.248 Å | Ben Smail, R.; Zid, M. F.; Driss, A. <i>Zh. Strukt. Khim.</i> <b>2017</b> , <i>58</i> , 734. (C <sub>13</sub> H <sub>28</sub> N <sub>2</sub> ) <sub>2</sub> (CrO <sub>4</sub> )(Cr <sub>2</sub> O <sub>7</sub> )                                                      |
| VETSIW   | 1.605+1.805; 3.230 Å | Pressprich, M. R.; Willett, R. D.; Sheets, R. M.; Paudler, W. W.; Gard, G. L. <i>Acta Crystallogr., Sect. C</i> <b>1990</b> , <i>46</i> , 1635. (C <sub>4</sub> H <sub>5</sub> N <sub>2</sub> O) <sub>2</sub> Cr <sub>2</sub> O <sub>7</sub> .                        |
| RINYEW   | 1.607+1.793; 3.165 Å | Sahoo, R. ; Mondal, S. ; Chand, S. ; Manna, A. K. ; Das, M. C. <i>Small</i> <b>2023</b> , <i>19</i> , 2304581. (H <sub>2</sub> N( <i>i</i> -C <sub>3</sub> H <sub>7</sub> )) <sub>2</sub> Cr <sub>2</sub> O <sub>7</sub>                                              |
| 23546    | 1.608+1.775; 3.215 Å | Panagiotopoulos, N. C.; Brown, I. D. <i>Can. J. Chem.</i> <b>1970</b> , <i>48</i> , 537. Rb <sub>2</sub> Cr <sub>2</sub> O <sub>7</sub>                                                                                                                               |
| PAJHIS   | 1.608+1.789; 3.119 Å | Zhi-Min Jin, Hui-Min Zhang, Hai-Bin Wang, Mao-Lin Hu, Liang Shen <i>Acta Crystallogr., Sect. C</i> <b>2004</b> , <i>60</i> , m572. (C <sub>6</sub> H <sub>14</sub> N <sub>2</sub> )Cr <sub>2</sub> O <sub>7</sub> .                                                   |
| PELREH   | 1.608+1.769; 3.266 Å | Dhawan, P. ; Saini, A. ; Goel, S. ; Tyagi, N. ; Yadav, H. J. <i>Mol. Struct.</i> <b>2022</b> , <i>1270</i> , 133869. ( <i>i</i> -C <sub>3</sub> H <sub>7</sub> ) <sub>2</sub> NH) <sub>2</sub> Cr <sub>2</sub> O <sub>7</sub>                                         |
| LABXAN   | 1.609+1.806; 3.169 Å | Pecaut, J.; Masse, R. <i>Acta Crystallogr., Sect. B</i> <b>1993</b> , <i>49</i> , 277. (C <sub>5</sub> H <sub>6</sub> N <sub>3</sub> ) <sub>2</sub> Cr <sub>2</sub> O <sub>7</sub> .                                                                                  |
| 2534     | 1.609+1.678; 3.267 Å | Panagiotopoulos, N. C.; Brown, I. D. <i>Acta Crystallogr., Sect. B</i> <b>1973</b> , <i>29</i> , 890. Na <sub>2</sub> Cr <sub>2</sub> O <sub>7</sub>                                                                                                                  |
| LEHFUB   | 1.609+1.774; 3.248 Å | Trabelai, S.; Marouani, H.; Al-Deyab, S. S.; Rzaigui, M. <i>Acta Crystallogr., Sect. E</i> <b>2012</b> , <i>68</i> , m1056. (H <sub>3</sub> N(CH <sub>2</sub> ) <sub>3</sub> NH <sub>3</sub> )Cr <sub>2</sub> O <sub>7</sub>                                          |
| 10371    | 1.610+1.783; 3.171 Å | Brunton, G. <i>Mater. Res. Bull.</i> <b>1973</b> , <i>8</i> , 271. K <sub>2</sub> Cr <sub>2</sub> O <sub>7</sub>                                                                                                                                                      |
| PAJHIS01 | 1.610+1.789; 3.121 Å | Javanshir, Z.; Ghammamy, S.; Di Vaira, M.; Baghy, M. R.; Sahebalzamani, H.; Shakeri, R.; Salehzade, J. <i>J. Chem. Cryst.</i> <b>2011</b> , <i>41</i> , 1751. (C <sub>6</sub> H <sub>14</sub> N <sub>2</sub> )Cr <sub>2</sub> O <sub>7</sub> .                        |
| VEWFIP   | 1.610+1.783; 3.224 Å | Hadhri, M.; Chebbi, H.; Haddad, A.; Ayed, B. <i>J. Coord. Chem.</i> <b>2018</b> , <i>71</i> , 1035. (C <sub>5</sub> H <sub>6</sub> N <sub>5</sub> )(Cr <sub>2</sub> O <sub>7</sub> )                                                                                  |
| 2829     | 1.611+1.759; 3.291 Å | Panagiotopoulos, N. C.; Brown, I. D. <i>Acta Crystallogr., Sect. B</i> <b>1972</b> , <i>28</i> , 2880. NaKCr <sub>2</sub> O <sub>7</sub>                                                                                                                              |
| 20693    | 1.611+1.792; 3.197 Å | Fykin, L. E.; Nozik, Y. Z. <i>Kristallografiya</i> <b>1983</b> , <i>28</i> , 1033. Li <sub>2</sub> Cr <sub>2</sub> O <sub>7</sub> ·2H <sub>2</sub> O                                                                                                                  |
| PELREH   | 1.611+1.769; 3.264 Å | Dhawan, P. ; Saini, A. ; Goel, S. ; Tyagi, N. ; Yadav, H. J. <i>Mol. Struct.</i> <b>2022</b> , <i>1270</i> , 133869. (H <sub>2</sub> N( <i>i</i> -C <sub>3</sub> H <sub>7</sub> )) <sub>2</sub> Cr <sub>2</sub> O <sub>7</sub>                                        |

|                  |                                              |                                                                                                                                                                                                                                                                                                              |
|------------------|----------------------------------------------|--------------------------------------------------------------------------------------------------------------------------------------------------------------------------------------------------------------------------------------------------------------------------------------------------------------|
| YIMJOU<br>20207  | 1.611+1.784; 3.322 Å<br>1.612+1.792; 3.207 Å | Bock, H.; Nather, C.; John, A.; Nick, S.; Ruppert, K. CDCC deposit number 226885, <b>2007</b> .<br>Simonov, M. A.; Nozik, Y. Z.; Yamnova, N. A.; Belokoneva, E. L.; Belov, N. V. <i>Dokl. Akad. Nauk SSSR</i> <b>1978</b> , <i>240</i> , 85-87. $\text{Li}_2\text{Cr}_2\text{O}_7 \cdot 2\text{H}_2\text{O}$ |
| 59983            | 1.612+1.785; 3.173 Å                         | Weakley, T. J. R.; Ylvisaker, E. R.; Yager, R. J.; Stephens, J. E.; Wiegel, R. D.; Mengis, M.; Wu, P.; Photinos, P.; Abrahams, S. C. <i>Acta Crystallogr., Sect. B</i> <b>2004</b> , <i>60</i> , 705. $\text{K}_2\text{Cr}_2\text{O}_7$                                                                      |
| 59984            | 1.612+1.784; 3.174 Å                         | Weakley, T. J. R.; Ylvisaker, E. R.; Yager, R. J.; Stephens, J. E.; Wiegel, R. D.; Mengis, M.; Wu, P.; Photinos, P.; Abrahams, S. C. <i>Acta Crystallogr., Sect. B</i> <b>2004</b> , <i>60</i> , 705. $\text{K}_2\text{Cr}_2\text{O}_7$                                                                      |
| WIHNUX<br>2771   | 1.612+1.766; 3.453 Å<br>1.613+1.784; 3.251 Å | Sieron, L. <i>Acta Crystallogr., Sect. E</i> <b>2007</b> , <i>63</i> , m2068. $(\text{C}_3\text{H}_7\text{N}_2\text{S})_2\text{Cr}_2\text{O}_7$                                                                                                                                                              |
| IKOMIG           | 1.613+1.772; 3.177 Å                         | Panagiotopoulos, N. C.; Brown, I. D. <i>Acta Crystallogr., Sect. B</i> <b>1972</b> , <i>28</i> , 1352. $\text{Na}_2\text{Cr}_2\text{O}_7$                                                                                                                                                                    |
| OZIGAH           | 1.613+1.795; 3.168 Å                         | Vetrivel, S.; Vinoth, E.; Mullai, R. U.; Aruljothi, R.; NizamMohideen, M. <i>Acta Crystallogr., Sect. E</i> <b>2016</b> , <i>72</i> , 616. $(\text{C}_{10}\text{H}_{28}\text{N}_4)(\text{Cr}_2\text{O}_7)_2$                                                                                                 |
| 409745<br>ACABAH | 1.614+1.786; 3.280 Å<br>1.614+1.768; 3.307 Å | Trabelsi, S.; Roisnel, T.; Marouani, H. CDCC deposit number 1038891, <b>2016</b> .<br>$(\text{H}_3\text{N}(\text{CH}_2)_3\text{C}_6\text{H}_5)_2\text{Cr}_2\text{O}_7$                                                                                                                                       |
| COXYAP02         | 1.614 +1.817; 3.273 Å                        | Kolitsch, U. Z. <i>Kristallogr. - New Crystal Struct.</i> <b>2003</b> , <i>218</i> , 401. $\text{Rb}_2\text{Cr}_2\text{O}_7$                                                                                                                                                                                 |
| KIJZAF           | 1.614+1.773; 3.238 Å                         | Weil, M. <i>Acta Crystallogr., Sect. E</i> <b>2001</b> , <i>57</i> , m322. $[\text{HgC}_{10}\text{H}_{10}\text{N}_2]\text{Cr}_2\text{O}_7$                                                                                                                                                                   |
| HMTMGC10         | 1.615+1.804; 3.241 Å                         | Lennartson, A.; Håkansson M. <i>Acta Crystallogr., Sect. C</i> <b>2009</b> , <i>65</i> , m182. $(\text{C}_5\text{H}_6\text{N})_2\text{Cr}_2\text{O}_7$                                                                                                                                                       |
| MEBDON           | 1.615+1.786; 3.210 Å                         | Sieron, L. <i>Acta Crystallogr., Sect. E</i> <b>2007</b> , <i>63</i> , m2336. $(\text{C}_4\text{H}_6\text{N}_3)_2\text{Cr}_2\text{O}_7$                                                                                                                                                                      |
| OCABOK           | 1.615+1.786; 3.059 Å                         | Dahan, F. <i>Acta Crystallogr., Sect. B</i> <b>1974</b> , <i>30</i> , 22. $[\text{Mg}(\text{H}_2\text{O})_6](\text{C}_6\text{H}_{12}\text{N}_4)_2\text{Cr}_2\text{O}_7$ .                                                                                                                                    |
| VAPHUS<br>24199  | 1.615+1.789; 3.303 Å<br>1.616+1.779; 3.167 Å | Fosse, N.; Brohan, L. <i>J. Solid State Chem.</i> <b>1999</b> , <i>145</i> , 655. $(\text{C}_7\text{H}_{10}\text{N})_2\text{Cr}_2\text{O}_7$ .                                                                                                                                                               |
| 280204           | 1.616+1.782; 3.135 Å                         | Srinivasan, B. R.; Naik, A. R.; Nather, C.; Bensch, W. <i>Acta Crystallogr., Sect. E</i> <b>2004</b> , <i>60</i> , m1384. $(\text{C}_4\text{H}_{12}\text{N}_2)\text{Cr}_2\text{O}_7$ .                                                                                                                       |
| 413593           | 1.616+1.783; 3.161 Å                         | Moon, D.; Choi, J.-H. <i>Acta Crystallogr., Sect. E</i> <b>2017</b> , <i>73</i> , 755. $(\text{C}_{10}\text{H}_{28}\text{N}_{34})(\text{Cr}_2\text{O}_7)_2 \cdot \text{H}_2\text{O}$                                                                                                                         |
| YUHLIW01         | 1.616+1.777; 3.140 Å                         | Brandon, J. K.; Brown, I. D. <i>Can. J. Chem.</i> <b>1968</b> , <i>46</i> , 933. $\text{K}_2\text{Cr}_2\text{O}_7$                                                                                                                                                                                           |
| DACYEO<br>166614 | 1.616+1.791; 3.211 Å<br>1.617+1.793; 3.121 Å | Krivovichev, S. V.; Kir'yanova, E. V.; Filatov, S. K.; Burns, P. C. <i>Acta Crystallogr., Sect. C</i> <b>2000</b> , <i>56</i> , 629-630. $\text{K}_2\text{Cr}_2\text{O}_7$                                                                                                                                   |
|                  |                                              | Sharma, R. P.; Bala, R.; Sharma, R.; Salas, J. M.; Quiros, M. J. <i>Coord. Chem.</i> <b>2005</b> , <i>58</i> , 217. $[\text{Co}(\text{NH}_3)_6]\text{ClCr}_2\text{O}_7 \cdot \text{H}_2\text{O}$                                                                                                             |
|                  |                                              | Srinivasan, B. R.; Dhuri, S. N.; Nather, C.; Bensch, W. <i>Indian J. Chem., Sect. A</i> <b>2003</b> , <i>42</i> , 2735. $(\text{C}_2\text{H}_{10}\text{N}_2)_2\text{Cr}_2\text{O}_7$ .                                                                                                                       |
|                  |                                              | Beheshti, A.; Hashemi, F.; Monavvar, M. F.; Khorrmdin, R.; Abrahams, C. T.; Motamedi, H.; Shakerzadeh, E. <i>J. Mol. Struct.</i> <b>2017</b> , <i>1133</i> , 591. $[\text{Ag}(\text{NC}_4\text{H}_6\text{N})_2]\text{Cr}_2\text{O}_7$                                                                        |
|                  |                                              | Nozik, Y. Z.; Bukin, V. I.; Fykin, L. E.; Belov, N. V. <i>Dokl. Akad. Nauk SSSR</i> <b>1975</b> , <i>224</i> , 580. $\text{Na}_2\text{Cr}_2\text{O}_7 \cdot 2\text{H}_2\text{O}$                                                                                                                             |

|        |                                             |                                                                                                                                                                                                                                                                                                                     |
|--------|---------------------------------------------|---------------------------------------------------------------------------------------------------------------------------------------------------------------------------------------------------------------------------------------------------------------------------------------------------------------------|
| 413950 | 1.617+1.780; 3.278 Å                        | Locock, A. J.; Burns, P. C. <i>Z. Kristallogr.</i> <b>2004</b> , <i>219</i> , 259. $\text{Th}_2\text{Cr}_2\text{O}_7$ .                                                                                                                                                                                             |
| LAMVOM | 1.617+1.784; 3.205 Å                        | Gholizadeh, M.; Pourayoubi, M.; Kia, M.; Rheingold, A. L.; Golen, J. A. <i>Acta Crystallogr., Sect. E</i> <b>2012</b> , <i>68</i> , m305. $(\text{C}_5\text{H}_5(\text{CH}_2)_2\text{C}_5\text{H}_5)_2\text{Cr}_2\text{O}_7$                                                                                        |
| OWUFIX | 1.617+1.779; 3.158 Å                        | Chebba, H.; Ben Smail, R.; Zid, M. F. <i>Zh. Strukt. Khim.</i> <b>2016</b> , <i>57</i> , 632. $(\text{C}_{10}\text{H}_{22}\text{N}_2)\text{Cr}_2\text{O}_7$                                                                                                                                                         |
| 6103   | 1.618+1.781; 3.100 Å                        | Dalgaard, G. A. P.; Hazell, A. C.; Hazell, R. G. <i>Acta Chem. Scand., Ser. A</i> <b>1974</b> , <i>28</i> , 541. $(\text{NH}_4)_2\text{Cr}_2\text{O}_7$                                                                                                                                                             |
| 15034  | 1.618+1.774; 3.116 Å                        | Löfgren, P.; Waltersson, K. <i>Acta Chem. Scand.</i> <b>1971</b> , <i>25</i> , 35. $\text{Rb}_2\text{Cr}_2\text{O}_7$                                                                                                                                                                                               |
| UXOWEK | 1.618+1.784; 3.216 Å                        | Goddard, P. A.; Singleton, J.; Sengupta, P.; McDonald, R. D.; Lancaster, T.; Blundell, S. J.; Pratt, F. L.; Cox, S.; Harrison, N.; Manson, J. L.; Southerland, H. I.; Schlueter, J. A. <i>New. J. Phys.</i> <b>2008</b> , <i>10</i> , 83025. $(\text{CuC}_8\text{H}_{12}\text{N}_4\text{O}_2)\text{Cr}_2\text{O}_7$ |
| 417523 | 1.619+1.786; 3.093 Å                        | Casari, B. M.; Eriksson, A. K.; Langer, V. <i>Z. Naturforsch., Teil B</i> <b>2007</b> , <i>62</i> , 771. $(\text{NH}_4)_2\text{Cr}_2\text{O}_7$ .                                                                                                                                                                   |
| 417524 | 1.623+1.803; 3.134 Å                        | Casari, B. M.; Eriksson, A. K.; Langer, V. <i>Z. Naturforsch., Teil B</i> <b>2007</b> , <i>62</i> , 771. $\text{Na}_2\text{Cr}_2\text{O}_7 \cdot 2\text{H}_2\text{O}$                                                                                                                                               |
| YUHLIW | 1.624+1.782; 3.150 Å                        | Lorenzo-Luis, P. A.; Martin-Zarza, P.; Gili, P.; Arrieta, J. M.; Germain, G.; Dupont, L. <i>Acta Crystallogr., Sect. C</i> <b>1995</b> , <i>51</i> , 1073. $(\text{C}_2\text{H}_{10}\text{N}_2)_2\text{Cr}_2\text{O}_7$ .                                                                                           |
| 78663  | 1.627+1.833; 3.112 Å                        | Laligant, Y.; Le Bail, A. <i>Powder Diffraction</i> <b>1995</b> , <i>10</i> , 159. $[\text{Pd}(\text{NH}_3)_4]\text{Cr}_2\text{O}_7$                                                                                                                                                                                |
| ONISAI | 1.632+1.790; 3.272 Å                        | Agarwal, R. A. <i>Cryst. Growth Des.</i> <b>2021</b> , <i>21</i> , 2046. $[\text{Cd}_4\text{C}_{108}\text{H}_{74}\text{N}_{12}\text{O}_{16}]\text{Cr}_2\text{O}_7 \cdot 33\text{H}_2\text{O}$                                                                                                                       |
| 27732  | 1.634+1.791; 3.162 Å                        | Kharitonov, Y. A.; Kuz'min, E. A.; Belov, N. V. <i>Kristallografiya</i> <b>1970</b> , <i>15</i> , 942. $\text{Na}_2\text{Cr}_2\text{O}_7 \cdot 2\text{H}_2\text{O}$                                                                                                                                                 |
| 6129   | 1.642+1.829; 3.060 Å                        | Datt, I.D.; Ozerov, R.P. <i>Kristallografiya</i> <b>1974</b> , <i>19</i> , 110-117. $\text{Li}_2\text{Cr}_2\text{O}_7 \cdot 2\text{H}_2\text{O}$                                                                                                                                                                    |
| HAFJOO | 1.652+1.809; 3.287 Å                        | Ramaiah, K.; Dubey, P. K.; Ramanatham, J.; Kumar, C. R.; Grossert, J. S.; Cameron, T. S.; Sareda, S. V. <i>Indian J. Chem., Sect. B</i> <b>2002</b> , <i>41</i> , 2136. $(\text{C}_8\text{H}_9\text{N})_2\text{Cr}_2\text{O}_7$ .                                                                                   |
| ABULAL | 1.659+1.809; 3.162 Å                        | Sheming Lu, Shoubo Qin, Yanxiong Ke, Jianmin Li, Hongxia Pei, Shuxi Zhou, Xintao Wu, Wenxin Du <i>Cryst. Res. Technol.</i> <b>2004</b> , <i>39</i> , 89. $[\text{Ag}_2\text{C}_{12}\text{H}_{24}\text{N}_8]_n(\text{Cr}_2\text{O}_7)_n \cdot n\text{H}_2\text{O}$                                                   |
| ZAWWID | 1.659+1.823; 3.017 Å                        | Benetollo, F.; Bombieri, G.; Gilli, P.; Harlow, P. M.; Polo, A.; Vallarino, L. M. <i>Polyhedron</i> <b>1995</b> , <i>14</i> , 2255. $[\text{CrEuC}_{22}\text{H}_{28}\text{N}_6\text{O}_5]_2\text{Cr}_2\text{O}_7 \cdot 2\text{H}_2\text{O}$                                                                         |
| CUBQUL | 1.662+1.712; 3.232 Å                        | Gili, P. <i>Rev. Chim. Miner.</i> <b>1984</b> , <i>21</i> , 171. $(\text{C}_5\text{H}_6\text{N})_2\text{Cr}_2\text{O}_7$                                                                                                                                                                                            |
| MAPNUM | 1.681+1.783; 3.273 Å                        | Fosse, N.; Brohan, L. <i>J. Solid State Chem.</i> <b>1999</b> , <i>145</i> , 655. $(\text{N}(\text{CH}_3)_2\text{C}_{16}\text{H}_{33})_2\text{Cr}_2\text{O}_7$                                                                                                                                                      |
| Mean   | <b>1.608+1.780 Å; 3.219 Å/82 structures</b> |                                                                                                                                                                                                                                                                                                                     |

**Molybdate, MoO<sub>4</sub><sup>2-</sup>**

| ICSD/CSD code | d(Mo-O) | Reference                                                                                                                                                                                                                                                                                                                                           |
|---------------|---------|-----------------------------------------------------------------------------------------------------------------------------------------------------------------------------------------------------------------------------------------------------------------------------------------------------------------------------------------------------|
| 150842        | 1.677 Å | Guarniere, A. A. ; Moreira, A. M. ; Pinheiro, C. B. ; Speziali, N. L. <i>Phys. B.</i> <b>2003</b> , 334, 303. K <sub>2</sub> MoO <sub>4</sub>                                                                                                                                                                                                       |
| 95859         | 1.686 Å | Schweda, E.; Hofmann, M.; Dittmann, M.; Glaser, J. Z. <i>Kristallogr.</i> <b>2002</b> , 217, 164. (NH <sub>4</sub> ) <sub>2</sub> MoO <sub>4</sub>                                                                                                                                                                                                  |
| 74028         | 1.698 Å | Laligant, Y. <i>Eur. J. Solid State Inorg. Chem.</i> <b>1993</b> , 30, 1017. [Pd(NH <sub>3</sub> ) <sub>4</sub> ]MoO <sub>4</sub>                                                                                                                                                                                                                   |
| GAWSIG01      | 1.701 Å | Lin, B.-Z.; Han, G.-H.; Geng, F.; Ding, C. <i>J. Indian Chem. Soc.</i> <b>2006</b> , 62, m532. [Ni(H <sub>2</sub> N(CH <sub>2</sub> ) <sub>2</sub> NH <sub>2</sub> ) <sub>3</sub> ]MoO <sub>4</sub>                                                                                                                                                 |
| 35442         | 1.708 Å | van den Berg, A.J.; Overeijnder, H.; Tuinstra, F. <i>Acta Crystallogr., Sect. C</i> <b>1983</b> , 39, 678. K <sub>2</sub> MoO <sub>4</sub>                                                                                                                                                                                                          |
| GAWSIG01      | 1.708 Å | Bi-Zhou Lin, Guo-Hua Han, Feng Geng, Cong Ding <i>Acta Crystallogr., Sect. E</i> <b>2006</b> , 62, m532. [Ni(H <sub>2</sub> N(CH <sub>2</sub> ) <sub>2</sub> NH <sub>2</sub> ) <sub>3</sub> ]MoO <sub>4</sub>                                                                                                                                       |
| QIKSOK        | 1.715 Å | Ren-Zhang Wang, Ya-Feng Li, Xiao-Guang Qiao, Guo-Yu Yang, Yong-Heng Xing, Qing-Xin Zeng, Ji-Qing Xu, Yong-Hua Lin, Yan Xing, Heng-Qing Jia <i>Gaodeng Xuexiao Huaxue Xuebao</i> <b>1999</b> , 20, 1186. [Co(H <sub>2</sub> N(CH <sub>2</sub> ) <sub>2</sub> NH <sub>2</sub> ) <sub>3</sub> ]MoO <sub>4</sub>                                        |
| 280056        | 1.719 Å | Friese, K.; Madariaga, G.; Breczewski, T. <i>Acta Crystallogr., Sect. C</i> <b>1999</b> , 55, 1753. Tl <sub>2</sub> MoO <sub>4</sub>                                                                                                                                                                                                                |
| OWOSAV        | 1.721 Å | Liao, J.-H.; Chang, H.-W.; You, H.-C.; Fang, C.-S.; Liu, C. W. <i>Inorg. Chem.</i> <b>2011</b> , 50, 2070. [Ag <sub>32</sub> C <sub>96</sub> H <sub>240</sub> O <sub>48</sub> P <sub>24</sub> S <sub>48</sub> ](MoO <sub>4</sub> ) <sub>2</sub> (PF <sub>6</sub> ) <sub>4</sub> ·2CH <sub>3</sub> COCH <sub>3</sub>                                 |
| 280608        | 1.730 Å | Friese, K.; Aroyo, M. I.; Folcia, C. L.; Madariaga, G.; Breczewski, T. <i>Acta Crystallogr., Sect. B</i> <b>2001</b> , 57, 142. Tl <sub>2</sub> MoO <sub>4</sub>                                                                                                                                                                                    |
| AREGUA        | 1.730 Å | Kondracka, M.; Merzweiler, K. <i>Z. Anorg. Allg. Chem.</i> <b>2011</b> , 637, 348. [Sn(CH <sub>2</sub> C <sub>6</sub> H <sub>5</sub> ) <sub>3</sub> ]MoO <sub>4</sub>                                                                                                                                                                               |
| YASQAL        | 1.730 Å | Guo-Hua Han, Bi-Zhou Lin, Zhen Li <i>Crystallogr., Sect. E</i> <b>2005</b> , 61, m313. [Zn(H <sub>2</sub> N(CH <sub>2</sub> ) <sub>2</sub> NH <sub>2</sub> ) <sub>3</sub> ]MoO <sub>4</sub>                                                                                                                                                         |
| VIDHAU        | 1.733 Å | Krivovichev, S. V.; Cahill, C. L.; Nazarchuk, E. V.; Burns, P. C.; Armbruster, T.; Depmeier, W. <i>Micropor. Mesopor. Mater.</i> <b>2005</b> , 78, 209. ((C <sub>2</sub> H <sub>5</sub> ) <sub>2</sub> NH <sub>2</sub> ) <sub>2</sub> (UO <sub>2</sub> ) <sub>4</sub> (MoO <sub>4</sub> ) <sub>5</sub> ·2H <sub>2</sub> O                           |
| VAHVUW        | 1.735 Å | Guoyou Luan, Yangguang Li, Enbo Wang, Zhengbo Han, Changwen Hu, Ninghai Hu, Hengqing Jia <i>J. Solid State Chem.</i> <b>2001</b> , 165, 1. [Cu(H <sub>2</sub> N(CH <sub>2</sub> ) <sub>2</sub> NH <sub>2</sub> ) <sub>2</sub> ] <sub>4</sub> (MoO <sub>4</sub> ) <sub>2</sub> [Mo <sub>8</sub> O <sub>42</sub> SiV <sub>6</sub> ]·5H <sub>2</sub> O |
| MIQPEK        | 1.741 Å | Sarr, B.; Mbaye, A.; Diop, C. A. K.; Melin, F.; Hellwig, P.; Sidibe, M.; Rousselin, Y. <i>Acta Crystallogr., Sect. E</i> <b>2018</b> , 74, 1684. ( <i>i</i> -C <sub>3</sub> H <sub>7</sub> ) <sub>2</sub> NH <sub>2</sub> ) <sub>2</sub> MoO <sub>4</sub>                                                                                           |
| XAMWAK        | 1.741 Å | Guo-Hua Han, Bi-Zhou Lin, Zhen Li, Dong-Ya Sun, Pei-De Liu <i>J. Mol. Struct.</i> <b>2005</b> , 741, 31. [Cd(H <sub>2</sub> N(CH <sub>2</sub> ) <sub>2</sub> NH <sub>2</sub> ) <sub>3</sub> ]MoO <sub>4</sub>                                                                                                                                       |
| DCHXMO        | 1.742 Å | Thiele, A.; Fuchs, J. <i>Z. Naturforsch., Teil B</i> <b>1979</b> , 34, 145. (C <sub>12</sub> H <sub>24</sub> N) <sub>2</sub> MoO <sub>4</sub> ·2H <sub>2</sub> O                                                                                                                                                                                    |
| 11773         | 1.743 Å | Liu, J.; Sharma, N. <i>Inorg. Chem.</i> <b>2019</b> , 58, 9964. Li <sub>2</sub> MoO <sub>4</sub>                                                                                                                                                                                                                                                    |
| 20805         | 1.746 Å | Klevtsova, R. F.; Klevtsov, P. V.; Aleksandrov, K. S. <i>Dokl. Akad. Nauk SSSR</i> <b>1980</b> , 255, 1379. CsLiMoO <sub>4</sub>                                                                                                                                                                                                                    |
| ELIMUH        | 1.746 Å | Qing-Xin Zeng, Guo-Yu Yang, Ji-Qing Xu <i>Jiegou Huaxue</i> <b>2003</b> , 22, 336. [Ni(C <sub>10</sub> H <sub>8</sub> N <sub>2</sub> ) <sub>3</sub> ]MoO <sub>4</sub> ·7.5H <sub>2</sub> O                                                                                                                                                          |

|          |         |                                                                                                                                                                                                                                                                                                                                               |
|----------|---------|-----------------------------------------------------------------------------------------------------------------------------------------------------------------------------------------------------------------------------------------------------------------------------------------------------------------------------------------------|
| NASQUX   | 1.747 Å | Guo, Y.; Deng, Y.; Zheng, T.; Huang, L.; Gao, D.; Bi, J.; Zou, G. <i>Inorg. Chem. Front</i> <b>2021</b> , 9, 440. Cs <sub>3</sub> MoO <sub>4</sub> (HOOCO)                                                                                                                                                                                    |
| WINDIG   | 1.749 Å | E.C.Alyea, E. C.; Ferguson, G.; Zheng Xu <i>Crystallogr., Sect. C</i> <b>1995</b> , 51, 353. (C <sub>6</sub> H <sub>21</sub> N <sub>4</sub> ) <sub>4</sub> (MoO <sub>4</sub> ) <sub>6</sub> ·6H <sub>2</sub> O                                                                                                                                |
| 1512     | 1.751 Å | Sivestre, J. P. F.; Durif, A. <i>J. Solid State Chem.</i> <b>1978</b> , 24, 97. K <sub>3</sub> MoO <sub>4</sub> ReO <sub>4</sub>                                                                                                                                                                                                              |
| 240370   | 1.753 Å | Reinoso, S.; Dickman, M. H.; Reicke, M.; Kortz, U. <i>Inorg. Chem.</i> <b>2006</b> , 45, 9014. (CH <sub>3</sub> ) <sub>2</sub> Sn)MoO <sub>4</sub>                                                                                                                                                                                            |
| WEYDEJ   | 1.753 Å | Shamuratov, E. B.; Batsanov, A. S.; Struchkov, Y. T.; Yunuskhodzhaev, A. N. <i>Izv. Akad. Nauk SSSR, Ser. Khim.</i> <b>1992</b> , 1073. (C <sub>20</sub> H <sub>25</sub> N <sub>2</sub> O <sub>2</sub> ) <sub>2</sub> MoO <sub>4</sub> ·H <sub>2</sub> O                                                                                      |
| RAHTIG   | 1.754 Å | Sun, Y.-C.; Zhu, H.-T.; Lu, M.-D.; Zheng, S.-L.; Li, X.-H.; Zhang, L.-C. CDCC deposit number 715138, <b>2016</b> . [Ni(H <sub>2</sub> O) <sub>4</sub> (N <sub>2</sub> C <sub>6</sub> H <sub>6</sub> N <sub>2</sub> )]MoO <sub>4</sub> ·H <sub>2</sub> O                                                                                       |
| XUXKOS   | 1.754 Å | Custelcean, R.; Bonnesen, P. V.; Duncan, N. C.; Zhang, X.; Watson, L. A.; Van Berkel, G.; Parson, W. B., Hay, B. P. <i>J. Am. Chem. Soc.</i> <b>2012</b> , 134, 8525. [Zn <sub>4</sub> C <sub>186</sub> H <sub>216</sub> N <sub>36</sub> O <sub>6</sub> ]MoO <sub>4</sub> ·2CH <sub>3</sub> OH·11H <sub>2</sub> O                             |
| VUWRAJ01 | 1.755 Å | Khranenko, S. P.; Sukhikh, A. S.; Nikolaev, R. E.; Gromilov, S. A. <i>J. Struct. Chem.</i> <b>2020</b> , 61, 267. [Cu(NH <sub>2</sub> (CH <sub>2</sub> ) <sub>2</sub> NH <sub>2</sub> ) <sub>3</sub> ]MoO <sub>4</sub>                                                                                                                        |
| 84597    | 1.756 Å | Fabry, J.; Petricek, V.; Vanek, P.; Cisarova, I. <i>Acta Crystallogr., Sect. B</i> <b>1997</b> , 53, 596. K <sub>3</sub> Na(MoO <sub>4</sub> ) <sub>2</sub>                                                                                                                                                                                   |
| 20860    | 1.757 Å | Klevtsova, R. F.; Solov'eva, L. P.; Ishchenko, V. N.; Perepelitsa, A.; Klevtsov, P. N. <i>Kristallografiya</i> <b>1984</b> , 29, 232. RbLiMoO <sub>4</sub>                                                                                                                                                                                    |
| 68568    | 1.757 Å | Makitova, D. D.; Tkachev, V. V.; Mirzoev, R. S.; Karov, Z. G. <i>Koord. Khim.</i> <b>1989</b> , 15, 1334. Na <sub>3</sub> Li(MoO <sub>4</sub> ) <sub>2</sub> ·2H <sub>2</sub> O                                                                                                                                                               |
| BAGPEE   | 1.757 Å | Timmins, T.; Weakley, T. J. R. <i>Cryst. Struct. Commun.</i> <b>1981</b> , 10, 1037. (CH <sub>6</sub> N <sub>3</sub> ) <sub>2</sub> MoO <sub>4</sub>                                                                                                                                                                                          |
| EKABAT   | 1.757 Å | Li-Mei Duan, Cheng-Ling Pan, Ji-Qing Xu, Xiao-Bing Cui, Feng-Tong Xie, Tie-Gang Wang <i>Eur. J. Inorg. Chem.</i> <b>2003</b> , 2578. H <sub>3</sub> [Cu(H <sub>2</sub> N(CH) <sub>2</sub> NH <sub>2</sub> ) <sub>2</sub> ] <sub>4</sub> [Mo <sub>8</sub> O <sub>42</sub> V <sub>7</sub> ](MoO <sub>4</sub> ) <sub>2</sub> ·14H <sub>2</sub> O |
| 84291    | 1.758 Å | Colbeau-Justin, C.; Wallez, G.; Xuriguera, A. M.; Elfakir, A.; Jaulmes, S.; Quarton, M. <i>Eur. J. Solid State Inorg. Chem.</i> <b>1997</b> , 34, 1097. Tl <sub>3</sub> Li(MoO <sub>4</sub> ) <sub>2</sub>                                                                                                                                    |
| 131739   | 1.758 Å | Shi, T.; Zhang, F.; Li, Y.; Gao, L.; Yang, Z.; Pan, S. <i>Inorg. Chem.</i> <b>2020</b> , 79, 3034. Na <sub>3</sub> MoO <sub>4</sub> IO <sub>3</sub>                                                                                                                                                                                           |
| FOCVUO   | 1.758 Å | Bensch, W.; Hug, P.; Emmenegger, R.; Reller, A.; Oswald, H. R. <i>Mater. Res. Bull.</i> <b>1987</b> , 22, 447. (H <sub>3</sub> N(CH) <sub>2</sub> NH <sub>3</sub> ) <sub>2</sub> MoO <sub>4</sub>                                                                                                                                             |
| NIMPEF   | 1.758 Å | Liu, Z.-H.; Li, H.-J. <i>J. Alloys Compd.</i> <b>2006</b> , 426, 97. [Ni]H <sub>2</sub> N(CH <sub>2</sub> ) <sub>2</sub> NH <sub>2</sub> ] <sub>3</sub> ](MoO <sub>4</sub> ) <sub>2</sub> ·B(OH) <sub>3</sub> ·6H <sub>2</sub> O                                                                                                              |
| 110042   | 1.759 Å | Abrahams, B. F.; Haywood, M. G.; Hudson, T. A.; Robson, R. <i>Angew. Chem.</i> <b>2004</b> , 43, 6157. ((CH <sub>3</sub> ) <sub>4</sub> N)(C(NH <sub>2</sub> ) <sub>3</sub> )MoO <sub>4</sub>                                                                                                                                                 |
| 182821   | 1.760 Å | Gudkova, I. A.; Solodovnikova, Z. A.; Solodovnikov, S. F.; Zolotova, E. S.; Kurat'eva, N. V. <i>Zh. Neorg. Khim.</i> <b>2011</b> , 56, 1517. KLiMoO <sub>4</sub>                                                                                                                                                                              |
| FAQCIK   | 1.759 Å | Abrahams, B. F.; Haywood, M. G.; Hudson, T. A.; Robson, R. <i>Angew. Chem., Int. Ed.</i> <b>2004</b> , 43, 6157. (C <sub>4</sub> H <sub>12</sub> N)(CH <sub>6</sub> N <sub>3</sub> )MoO <sub>4</sub>                                                                                                                                          |

|          |         |                                                                                                                                                                                                                                                                                       |
|----------|---------|---------------------------------------------------------------------------------------------------------------------------------------------------------------------------------------------------------------------------------------------------------------------------------------|
| 39293    | 1.760 Å | Klevtsova, R. F.; Glinskaya, L. A.; Perepelitsa, A. P.; Ishchenko, V. N.; Klevtsov, P. V. <i>Kristallografiya</i> <b>1990</b> , 35, 1094. Na <sub>3</sub> Rb(MoO <sub>4</sub> ) <sub>2</sub> ·9H <sub>2</sub> O                                                                       |
| IXAFIW   | 1.760 Å | Liendo, G.; Briceno, A.; Gonzalez, T.; Atencio, R. <i>Crystallogr., Sect. E</i> <b>2004</b> , 60, m1028. [Co(C <sub>10</sub> H <sub>8</sub> N <sub>2</sub> ) <sub>3</sub> NO <sub>3</sub> ] <sub>2</sub> MoO <sub>4</sub> ·H <sub>2</sub> O                                           |
| 136884   | 1.761 Å | Tillard, M.; Granier, D.; Reibel, C.; Daenens, L.; Armand, P. <i>J. Solid State Chem.</i> <b>2022</b> , 306, 122809. BaMoO <sub>4</sub>                                                                                                                                               |
| 408450   | 1.761 Å | Dittmann, M.; Schweda, E. <i>Z. Anorg. Allg. Chem.</i> <b>1998</b> , 624, 2033. (NH <sub>4</sub> ) <sub>2</sub> MoO <sub>4</sub>                                                                                                                                                      |
| DIPBOW   | 1.761 Å | Zavalij, P. Y.; Li, A.-M.; Eichhorn, W. B, CDCC deposit number 1881473, <b>2018</b> .                                                                                                                                                                                                 |
| OVUVUX   | 1.761 Å | Wutkowski, A.; Srinivasan, B. R.; Naik, A. R.; Schutt, C.; Nather, C.; Bensch, W. <i>Eur. J. Inorg. Chem.</i> <b>2011</b> , 2254. (C <sub>4</sub> H <sub>9</sub> NH <sub>3</sub> ) <sub>8</sub> [Mo <sub>7</sub> O <sub>24</sub> ](MoO <sub>4</sub> ) <sub>3</sub> ·3H <sub>2</sub> O |
| 20493    | 1.762 Å | Kruglik, A. I.; Klevtsova, R. F.; Aleksandrov, K. S. <i>Dokl. Akad. Nauk SSSR</i> <b>1983</b> , 271, 1388. RbLiMoO <sub>4</sub>                                                                                                                                                       |
| 18229    | 1.762 Å | Shusharina, E. A.; Plyusnin, P. E.; Khramenko, S. P.; Gromilov, S. A. <i>J. Struct. Chem.</i> <b>2011</b> , 52, 125. [Ir(NH <sub>3</sub> ) <sub>5</sub> Cl]MoO <sub>4</sub>                                                                                                           |
| 257503   | 1.762 Å | Zolotova, E. S.; Solodovnikova, Z. A.; Yudin, V. N.; Solodovnikov, S. F.; Khaikina, E. G.; Basovich, O. M.; Korolkov, I. V.; Filatova, I. Y. <i>J. Solid State Chem.</i> <b>2016</b> , 233, 23. Cs <sub>3</sub> Na(MoO <sub>4</sub> )                                                 |
| 16154    | 1.763 Å | Gatehouse, B. M.; Leverett, P. <i>J. Chem. Soc. A</i> <b>1969</b> , 849. K <sub>2</sub> MoO <sub>4</sub>                                                                                                                                                                              |
| 408479   | 1.763 Å | Dittmann, M.; Schweda, E. <i>Z. Anorg. Allg. Chem.</i> <b>1998</b> , 624, 2033. (NH <sub>4</sub> ) <sub>2</sub> MoO <sub>4</sub>                                                                                                                                                      |
| CHAMMO   | 1.763 Å | Thiele, A.; Fuchs, J. <i>Z. Naturforsch., Teil B</i> <b>1979</b> , 34, 145. (C <sub>6</sub> H <sub>14</sub> N) <sub>2</sub> MoO <sub>4</sub>                                                                                                                                          |
| JUSLOA   | 1.763 Å | Kuang, Y.; Yang, B.; Pan, J.; Meng, X.; Xiao, F. <i>Z. Anorg. Allg. Chem.</i> <b>2015</b> , 641, 1684. [Cu <sub>4</sub> C <sub>48</sub> H <sub>40</sub> N <sub>8</sub> O <sub>6</sub> ](MoO <sub>4</sub> ) <sub>2</sub> ·10H <sub>2</sub> O                                           |
| 49910    | 1.764 Å | Ozeki, T.; Ichida, H.; Sasaki, Y. <i>Acta Crystallogr., Sect. C</i> <b>1987</b> , 43, 2220. (C(NH <sub>2</sub> ) <sub>3</sub> ) <sub>2</sub> MoO <sub>4</sub>                                                                                                                         |
| 94489    | 1.764 Å | Kolitsch, U. <i>Z. Kristallogr.</i> <b>2001</b> , 216, 449. Li <sub>2</sub> MoO <sub>4</sub>                                                                                                                                                                                          |
| BAGPEE01 | 1.764 Å | Ozeki, T.; Ichida, H.; Sasaki, Y. <i>Crystallogr., Sect. C</i> <b>1987</b> , 43, 2220. (CH <sub>6</sub> N <sub>3</sub> ) <sub>2</sub> MoO <sub>4</sub>                                                                                                                                |
| CUFSII   | 1.764 Å | Srinivasan, B. R.; Morajkar, S. M.; Kandolkar, S. S.; Gobre, V. V.; Apreyan, R. A. <i>J. Mol. Struct.</i> <b>2020</b> , 1204, 127518. (C(C <sub>2</sub> H <sub>4</sub> OH) <sub>3</sub> NH <sub>3</sub> )NH <sub>4</sub> MoO <sub>4</sub>                                             |
| HEKFOS   | 1.765 Å | P. Roman, P.; San Jose, A.; Luque, A.; Gutierrez-Zorrilla, J. M.; Martinez-Ripoll, M. <i>Acta Crystallogr., Sect. C</i> <b>1994</b> , 50, 1189. (t-C <sub>3</sub> H <sub>7</sub> NH <sub>3</sub> ) <sub>2</sub> MoO <sub>4</sub>                                                      |
| 422142   | 1.766 Å | Shusharina, E. A.; Khramenko, S. P.; Plyusin, P. E.; Kardash, T. Y.; Gromilov, S. A. <i>Zh. Strukt. Khim.</i> <b>2011</b> , 52, 946. [Co(NH <sub>3</sub> ) <sub>5</sub> Cl]MoO <sub>4</sub>                                                                                           |
| VIFSUC   | 1.766 Å | Sukmana, N. C. Sugiarto, Shinogi, J.; Kojima, T.; Higashiura, A.; Yamamoto, A.; Sakaguchi, T.; Sadakane, M. <i>Chem. Lett.</i> <b>2023</b> , 52, 167. (CH <sub>3</sub> NH <sub>3</sub> ) <sub>2</sub> MoO <sub>4</sub>                                                                |
| 54019    | 1.767 Å | Klevtsov, P. V.; Glinskaya, L. A.; Klevtsova, R. F.; Aleksandrov, K. S. <i>Zh. Strukt. Khim.</i> <b>1997</b> , 38, 739. CsNaMoO <sub>4</sub> ·2H <sub>2</sub> O                                                                                                                       |



|        |         |                                                                                                                                                                                                                                                                                                                                                                                       |
|--------|---------|---------------------------------------------------------------------------------------------------------------------------------------------------------------------------------------------------------------------------------------------------------------------------------------------------------------------------------------------------------------------------------------|
| 187074 | 1.772 Å | Khramenko, S. P.; Shusharina, E. A.; Smolentsev, A. I.; Plyusnin, P. E.; Gromilov, S. A. <i>Z. Strukt. Khim.</i> <b>2010</b> , <i>51</i> , 601. [Rh(NH <sub>3</sub> ) <sub>5</sub> Cl]ClMoO <sub>4</sub> ·H <sub>2</sub> O                                                                                                                                                            |
| 415412 | 1.767 Å | Capitelli, F.; Selim, M. D.; Mukherjea, K. K. <i>Asian J. Chem.</i> <b>2006</b> , <i>18</i> , 2856. Na <sub>2</sub> MoO <sub>4</sub> ·2H <sub>2</sub> O                                                                                                                                                                                                                               |
| RINMIM | 1.767 Å | Sheikhshoaie, I.; Ghazizadeh, M. <i>Bull. Chem. Soc. Ethiop.</i> <b>2013</b> , <i>27</i> , 69. (HOCH <sub>2</sub> (CH <sub>3</sub> ) <sub>2</sub> CNH <sub>3</sub> ) <sub>2</sub> MoO <sub>4</sub>                                                                                                                                                                                    |
| ROFPAG | 1.767 Å | Wane, A.; Kama, A. B.; Diop, M. B.; Diop, L.; Plasseraud, L.; Cattey, H. <i>IUCrData</i> <b>2019</b> , <i>4</i> , x190500. H <sub>3</sub> N(CH <sub>2</sub> ) <sub>3</sub> NH <sub>3</sub> MoO <sub>4</sub> .                                                                                                                                                                         |
| 39263  | 1.768 Å | Makitova, D. D.; Tkachev, V. V.; Atovmyan, L. O. <i>Koord. Khim.</i> <b>1990</b> , <i>16</i> , 616. NaLiMoO <sub>4</sub> ·2H <sub>2</sub> O                                                                                                                                                                                                                                           |
| 92904  | 1.769 Å | Barinova, A. V.; Rastsvetaeva, R. K.; Nekrasov, Y. V.; Pushcharovskii, D. Y. <i>Dokl. Akad. Nauk</i> <b>2001</b> , <i>376</i> , 343. Li <sub>2</sub> MoO <sub>4</sub>                                                                                                                                                                                                                 |
| COVFOK | 1.769 Å | Senchyk, G. A.; Lysenko, A. B.; Babaryk, A. A.; Rusanov, E. B.; Krautscheid, H.; Neves, P.; Valente, A. A.; Goncalves, I. S.; Kramer, K. W.; Liu, S.-X.; Decurtins, S.; Domasevitch, K. V. <i>Inorg. Chem.</i> <b>2014</b> , <i>53</i> , 10112. Cu <sub>4</sub> (C <sub>14</sub> H <sub>18</sub> N <sub>6</sub> ) <sub>2</sub> O(MoO <sub>4</sub> ) <sub>3</sub> ·7.5H <sub>2</sub> O |
| 4156   | 1.773 Å | Matsumoto, K.; Kobayashi, A.; Sasaki, Y. <i>Bull. Chem. Soc. Jpn.</i> <b>1975</b> , <i>48</i> , 1009. Na <sub>2</sub> MoO <sub>4</sub> ·2H <sub>2</sub> O                                                                                                                                                                                                                             |
| 9278   | 1.773 Å | Gonschorek, W.; Hahn, T. <i>Z. Kristallogr., Kristallgeom., Kristallphys., Kristallchem.</i> <b>1973</b> , <i>138</i> , 167. Cs <sub>2</sub> MoO <sub>4</sub>                                                                                                                                                                                                                         |
| 65006  | 1.773 Å | Klevtsova, R. F.; Glinskaya, L. A.; Klevtsov, P. V. <i>Kristallografiya</i> <b>1988</b> , <i>33</i> , 636. Na <sub>3</sub> Li(MoO <sub>4</sub> ) <sub>2</sub> ·2H <sub>2</sub> O                                                                                                                                                                                                      |
| 33406  | 1.774 Å | Guo, X.; Song, S.; Jiang, X.; Cui, J.; Li, Y.; Lv, W.; Liu, H.; Han, Y.; Wang, L. <i>J. Alloys Compds.</i> <b>2021</b> , <i>857</i> , 157515. CaMoO <sub>4</sub>                                                                                                                                                                                                                      |
| 421983 | 1.774 Å | Machon, D.; Friese, K.; Breczewski, T.; Grzechnik, A. <i>J. Solid State Chem.</i> <b>2010</b> , <i>183</i> , 2558. Tl <sub>2</sub> MoO <sub>4</sub>                                                                                                                                                                                                                                   |
| 259254 | 1.775 Å | Smith, A. L.; Kauric, G.; van Eijck, I.; Goubitz, K.; Wallez, G.; Griveau, J. C.; Clavier, N.; Konings, R. J. M. <i>J. Solid State Chem.</i> <b>2017</b> , <i>253</i> , 89. Cs <sub>2</sub> MoO <sub>4</sub>                                                                                                                                                                          |
| 151970 | 1.787 Å | Bramnik, K. G.; Ehrenberg, H. <i>Z. Anorg. Allg. Chem.</i> <b>2004</b> , <i>630</i> , 1336. Na <sub>2</sub> MoO <sub>4</sub>                                                                                                                                                                                                                                                          |
| 14555  | 1.787 Å | Perera, S. S.; Munasinghe, H. N.; Yatooma, E. N.; Rabuffetti, F. A. <i>Dalton Trans.</i> <b>2020</b> , <i>49</i> , 7914. Na <sub>2</sub> MoO <sub>4</sub>                                                                                                                                                                                                                             |
| 138662 | 1.787 Å | Griesemer, S. D.; Ward, L.; Wolverton, C. <i>Phys. Rev. Mater.</i> <b>2021</b> , <i>5</i> , 105003. Rb <sub>2</sub> Ba(MoO <sub>4</sub> ) <sub>2</sub>                                                                                                                                                                                                                                |
| 43145  | 1.793 Å | Dixit, P.; Chauhan, V.; Rai, S. B.; Pandey, P. C. <i>J. Alloys Compds.</i> <b>2022</b> , <i>897</i> , 162820. CaMoO <sub>4</sub>                                                                                                                                                                                                                                                      |
| SETXIA | 1.799 Å | Zhang, Z.; Yang, J.; Liu, Y.-Y.; Ma, J.-F. <i>CrystEngComm</i> <b>2013</b> , <i>15</i> , 3843. Na <sub>2</sub> [Cu <sub>6</sub> Mo <sub>6</sub> C <sub>96</sub> H <sub>96</sub> N <sub>72</sub> O <sub>19</sub> ](MoO <sub>4</sub> ) <sub>6</sub> ·9H <sub>2</sub> O                                                                                                                  |
| 248567 | 1.834 Å | Wallez, G.; Raison, P. E.; Smith, A. L.; Clavier, N.; Dacheux, N. <i>J. Solid State Chem.</i> <b>2014</b> , <i>215</i> , 225. Cs <sub>2</sub> MoO <sub>4</sub>                                                                                                                                                                                                                        |
| 36905  | 1.836 Å | Shandilya, A.; Y., Ram S.; Gupta, A. K.; Sreenivas, K. <i>Mater. Chem. Phys.</i> <b>2021</b> , <i>264</i> , 124441. SrMoO <sub>4</sub>                                                                                                                                                                                                                                                |
| 24904  | 1.847 Å | Kools, F. X. N. M.; Koster, A. S.; Rieck, G. D. <i>Acta Crystallogr., Sect. B</i> <b>1970</b> , <i>26</i> , 1974. Rb <sub>2</sub> MoO <sub>4</sub>                                                                                                                                                                                                                                    |



|             |                              |                                                                                                                  |
|-------------|------------------------------|------------------------------------------------------------------------------------------------------------------|
| 14556       | 1.847 Å                      | Perera, S. S.; Munasinghe, H. N.; Yatooma, E. N.; Rabuffetti, F. A. <i>Dalton Trans.</i> <b>2020</b> , 49, 7914. |
|             |                              | Na <sub>2</sub> WO <sub>4</sub>                                                                                  |
| <b>Mean</b> | <b>1.759 Å/69 structures</b> |                                                                                                                  |

**Tungstate, WO<sub>4</sub><sup>2-</sup>**

| ICSD/CSD code | d(W-O)  | Reference                                                                                                                                                                                                                              |
|---------------|---------|----------------------------------------------------------------------------------------------------------------------------------------------------------------------------------------------------------------------------------------|
| TBUAMW        | 1.753 Å | Thiele, A.; Fuchs, J. <i>Z. Naturforsch., Teil B</i> <b>1979</b> , <i>34</i> , 145. (C <sub>4</sub> H <sub>12</sub> N) <sub>2</sub> WO <sub>4</sub> ·H <sub>2</sub> O                                                                  |
| PEHLUJ        | 1.760 Å | Clegg, W.; Errington, R. J.; Fraser, K. A.; Richards, D. G. <i>Chem. Commun.</i> <b>1993</b> , 1105<br>(C <sub>10</sub> H <sub>16</sub> N) <sub>2</sub> WO <sub>4</sub> ·H <sub>2</sub> O                                              |
| LUQQOG        | 1.762 Å | Clegg, W.; Fraser, K. A. CCDC deposition number 2018987, <b>2020</b> . (((CH <sub>3</sub> ) <sub>4</sub> N) <sub>2</sub> WO <sub>4</sub> ·H <sub>2</sub> O                                                                             |
| 182291        | 1.768 Å | Shusharina, E. A.; Plyusnin, P. E.; Khranenko, S. P.; Gromilov, S. A. <i>J. Struct. Chem.</i> <b>2011</b> , <i>52</i> , 125.<br>[Ir(NH <sub>3</sub> ) <sub>5</sub> Cl]WO <sub>4</sub>                                                  |
| 417289        | 1.771 Å | Hartenbach, I.; Schleid, T. <i>Z. Anorg. Allg. Chem.</i> <b>2007</b> , <i>633</i> , 524. Na <sub>3</sub> FWO <sub>4</sub>                                                                                                              |
| HUKYER        | 1.771 Å | McMullan, J. <i>J. Chem. Phys.</i> <b>1959</b> , <i>31</i> , 1231. (C <sub>2</sub> H <sub>24</sub> N)WO <sub>4</sub> ·2H <sub>2</sub> O                                                                                                |
| 182716        | 1.772 Å | Khranenko, S. P.; Shusharina, E. A.; Smolentsev, A. I.; Plyusnin, P. E.; Gromilov, S. A. <i>Z. Strukt. Khim.</i> <b>2010</b> , <i>51</i> , 601. [Rh(NH <sub>3</sub> ) <sub>5</sub> Cl]WO <sub>4</sub>                                  |
| KIHQEX        | 1.773 Å | Choi, K.-Y.; Ryu, H.; Suh, I.-H. <i>Inorg. Chim. Acta</i> <b>2000</b> , <i>299</i> , 268. [Cu <sub>2</sub> W <sub>2</sub> C <sub>40</sub> N <sub>8</sub> O <sub>2</sub> )]WO <sub>4</sub> ·11H <sub>2</sub> O                          |
| 14879         | 1.774 Å | Bai, S.; Liu, Y.; Tan, G.; Liu, W.; Liu, D.; Wang, R.; Zhu, Y.; Ye, S.; Ren, H. <i>J. Luminescence</i> <b>2020</b> , <i>225</i> , 117351. CaWO <sub>4</sub>                                                                            |
| 422139        | 1.774 Å | Shusharina, E. A.; Khranenko, S. P.; Plyusnin, P. E.; Kardash, T. Y.; Gromilov, S. A. <i>Z. Strukt. Khim.</i> <b>2011</b> , <i>52</i> , 946. [Co(NH <sub>3</sub> ) <sub>5</sub> Cl]WO <sub>4</sub>                                     |
| 8212          | 1.775 Å | Okada, K.; Ossaka, J. <i>Acta Crystallogr., Sect. B</i> <b>1979</b> , <i>35</i> , 2189. Ti <sub>2</sub> WO <sub>4</sub>                                                                                                                |
| 240882        | 1.775 Å | Farrugia, L. <i>J. Acta Crystallogr., Sect. E</i> <b>2007</b> , <i>63</i> , i142. Na <sub>2</sub> WO <sub>4</sub> ·2H <sub>2</sub> O                                                                                                   |
| 183200        | 1.776 Å | Shigematsu, H.; Nomura, K.; Nishiyama, K.; Tojo, T.; Kawaji, H.; Atake, T.; Kawamura, Y.; Miyoshi, T.; Matsushita, Y.; Tanaka, M.; Mashiyama, H. <i>Ferroelectrics</i> <b>2011</b> , <i>414</i> , 195. Rb <sub>2</sub> WO <sub>4</sub> |
| 18860         | 1.780 Å | Nobre, F. X.; Nogueira, I. C.; da Silva Souza, G.; de Matos, J. M. E.; da Costa Couceiro, P. R.; Brito, W. R.; de la Cruz, J. P.; Leyet Ruiz, Y. <i>Inorg. Chem.</i> <b>2020</b> , <i>59</i> , 6029. CaWO <sub>4</sub>                 |
| 33179         | 1.780 Å | Sousa, P. B. de; Gouveia, A. F.; Sczancoski, J. C.; Nogueira, I. C.; Longo, E.; San-Miguel, M. A.; Cavalcante, L. S. <i>J. Alloys Compds.</i> <b>2021</b> , <i>855</i> , 157377. CaWO <sub>4</sub>                                     |
| 49595         | 1.780 Å | Wang, X.; Lv, J.; Xu, Y.; Zhang, L.; Shen, Y.; Zhou, H.; Zhou, D; Song, K.; Guo, H.; Shi, F. <i>J. Alloys Compds.</i> <b>2022</b> , <i>925</i> , 166669. CaWO <sub>4</sub>                                                             |
| LUQSIC        | 1.781 Å | Clegg, W.; Elsegood, M. R. J. CCDC deposition number 2019003, <b>2020</b> . (((C <sub>2</sub> H <sub>5</sub> ) <sub>4</sub> N) <sub>2</sub> WO <sub>4</sub> ·CH <sub>3</sub> CN                                                        |
| 244164        | 1.782 Å | Krause, L.; Herbst_irmer, R.; Sheldrick, G. M.; Stalke, D. <i>J. Appl. Crystallogr.</i> <b>2015</b> , <i>48</i> , 3.<br>Na <sub>2</sub> WO <sub>4</sub> ·2H <sub>2</sub> O                                                             |
| 195519        | 1.783 Å | Fortes, A. D. <i>Acta Crystallogr., Sect. E</i> <b>2015</b> , <i>71</i> , 592. Na <sub>2</sub> WO <sub>4</sub>                                                                                                                         |
| 160721        | 1.786 Å | Singh, D.-J. <i>Phys. Rev., Ser. 3. B</i> <b>2008</b> , <i>77</i> , 113101. Li <sub>2</sub> WO <sub>4</sub>                                                                                                                            |
| 14082         | 1.787 Å | Okada, K.; Ossaka, J. <i>Acta Crystallogr., Sect. B</i> <b>1980</b> , <i>36</i> , 657. CsLiWO <sub>4</sub>                                                                                                                             |

|             |                              |                                                                                                                                                                                                 |
|-------------|------------------------------|-------------------------------------------------------------------------------------------------------------------------------------------------------------------------------------------------|
| 15395       | 1.789 Å                      | Zachariasen, W. H.; Plettinger, H. A. <i>Acta Crystallogr.</i> <b>1961</b> , <i>14</i> , 229. Li <sub>2</sub> WO <sub>4</sub>                                                                   |
| 26181       | 1.789 Å                      | Koster, A. S.; Kools, F. X. N. M.; Rieck, G. D. <i>Acta Crystallogr., Sect. B</i> <b>1969</b> , <i>25</i> , 1704. K <sub>2</sub> WO <sub>4</sub>                                                |
| 67236       | 1.789 Å                      | Hartmann, P. Z. <i>Kristallogr.</i> <b>1989</b> , <i>187</i> , 139. Li <sub>2</sub> WO <sub>4</sub>                                                                                             |
| 2133        | 1.819 Å                      | Okada, K.; Morikawa, H.; Marumo, F.; Iwai, S. I. <i>Acta Crystallogr., Sect. B</i> <b>1974</b> , <i>30</i> , 1872. Na <sub>2</sub> WO <sub>4</sub>                                              |
| 187076      | 1.843 Å                      | Khramenko, S. P.; Alexeyev, A. V.; Naumov, D. Y.; Plyusnin, P. E.; Gromilov, S. A. <i>J. Struct. Chem.</i> <b>2012</b> , <i>53</i> , 748. [Co(NH <sub>3</sub> ) <sub>6</sub> ]ClWO <sub>4</sub> |
| <b>Mean</b> | <b>1.776 Å/24 structures</b> |                                                                                                                                                                                                 |

**Permanganate, MnO<sub>4</sub><sup>-</sup>**

| ICSD/CSD code | d(Mo-O) | Reference                                                                                                                                                                                                                                                                                                                                                          |
|---------------|---------|--------------------------------------------------------------------------------------------------------------------------------------------------------------------------------------------------------------------------------------------------------------------------------------------------------------------------------------------------------------------|
| CUWMAI        | 1.471 Å | Karaman, H.; Barton, R. J.; Robertson, B. E.; Lee, D. G. <i>J. Org. Chem.</i> <b>1984</b> , <i>49</i> , 4509. (C <sub>6</sub> H <sub>5</sub> ) <sub>3</sub> P(C <sub>7</sub> H <sub>15</sub> )MnO <sub>4</sub>                                                                                                                                                     |
| MASLEY        | 1.422 Å | Winpenny, R.; Brechin, E.; Gio-Batta, M.; Coxall, B.; Parsons, S.; Messenger, D. CCDC 278269.                                                                                                                                                                                                                                                                      |
| MEPHMN10      | 1.452 Å | Karaman, H.; Barton, R. J.; Robertson, B. E.; Lee, D. G. <i>J. Org. Chem.</i> <b>1984</b> , <i>49</i> , 4509. (C <sub>6</sub> H <sub>5</sub> ) <sub>3</sub> P(CH <sub>3</sub> )MnO <sub>4</sub>                                                                                                                                                                    |
| MEPHMN01      | 1.540 Å | Karaman, H.; Barton, R. J.; Robertson, B. E.; Lee, D. G. <i>J. Org. Chem.</i> <b>1984</b> , <i>49</i> , 4509.                                                                                                                                                                                                                                                      |
| 52378         | 1.534 Å | Mooney, R. C. L. <i>Phys. Rev.</i> <b>1931</b> , <i>37</i> , 1306. KMnO <sub>4</sub>                                                                                                                                                                                                                                                                               |
| MEPHMN10      | 1.468 Å | (CH <sub>3</sub> (C <sub>6</sub> H <sub>5</sub> ) <sub>3</sub> P)MnO <sub>4</sub>                                                                                                                                                                                                                                                                                  |
| 44416         | 1.552 Å | Venkatesan, K. <i>Thesis University of Madras</i> , <b>1959</b> . KMnO <sub>4</sub>                                                                                                                                                                                                                                                                                |
| 44625         | 1.553 Å | Ramaseshan, S.; Venkatesan, K.; Mani, N. V. <i>Proc. Indian Acad. Sci., Sect. A</i> <b>1957</b> , <i>46</i> , 95. KMnO <sub>4</sub>                                                                                                                                                                                                                                |
| ZONSOM        | 1.585 Å | Yi, X.-Y.; Wang, G.-C.; Ip, H.-F.; Wong, W.-Y.; Chen, L.; Sung, H. H.-Y.; Williams, L. D.; Leung, W.-H. <i>Eur. J. Inorg. Chem.</i> <b>2014</b> , 6097. [Ce <sub>2</sub> Co <sub>4</sub> C <sub>64</sub> H <sub>134</sub> O <sub>38</sub> P <sub>12</sub> ](MnO <sub>4</sub> ) <sub>2</sub> ·0.4C <sub>6</sub> H <sub>14</sub> ·0.2CH <sub>2</sub> Cl <sub>2</sub> |
| 26803         | 1.588 Å | Stanley, E. Z. <i>Kristallogr., Kristallgeom., Kristallphys., Kristallchem.</i> <b>1968</b> , <i>127</i> , 450. K <sub>3</sub> MnO <sub>4</sub> CrO <sub>4</sub>                                                                                                                                                                                                   |
| 432611        | 1.594 Å | Henning, H.; Bauchert, J. M.; Conrad, M.; Schleid, T. <i>Z. Naturforsch., Teil B</i> <b>2017</b> , <i>72</i> , 555. Sr(MnO <sub>4</sub> ) <sub>2</sub> ·3H <sub>2</sub> O                                                                                                                                                                                          |
| 116545        | 1.595 Å | Fogaca, L. A.; Kováts, É.; Németh, G.; Kamarás, K.; Béres, K. A.; Németh, P.; Petruševski, V.; Bereczki, L.; Holló, B. B.; Sajó, I. E.; Klébert, S.; Farkas, A.; Szilágyi, I. M.; Kótai, L. <i>Inorganics</i> <b>2022</b> , <i>10</i> , 18. [Co(NH <sub>3</sub> ) <sub>5</sub> Cl]MnO <sub>4</sub>                                                                 |
| 89506         | 1.603 Å | Hoppe, R.; Fischer, D.; Schneider, J. <i>Z. Anorg. Allg. Chem.</i> <b>1999</b> , <i>625</i> , 1135. KMnO <sub>4</sub>                                                                                                                                                                                                                                              |
| 89507         | 1.603 Å | Hoppe, R.; Fischer, D.; Schneider, J. <i>Z. Anorg. Allg. Chem.</i> <b>1999</b> , <i>625</i> , 1135. RbMnO <sub>4</sub>                                                                                                                                                                                                                                             |
| 89508         | 1.604 Å | Hoppe, R.; Fischer, D.; Schneider, J. <i>Z. Anorg. Allg. Chem.</i> <b>1999</b> , <i>625</i> , 1135. CsMnO <sub>4</sub>                                                                                                                                                                                                                                             |
| 425408        | 1.605 Å | Henning, H.; Bauchert, J. M.; Conrad, M.; Schleid, T. <i>Z. Naturforsch., Teil B</i> <b>2017</b> , <i>72</i> , 555. Ca(MnO <sub>4</sub> ) <sub>2</sub> ·4H <sub>2</sub> O                                                                                                                                                                                          |
| KELPIE        | 1.606 Å | Beres, K. A.; Homonnay, Z.; Kvitek, L.; Durrvanger, Z.; Kubikova, M.; Harmat, V.; Szilágyi, F.; Czegeny, Z.; Nemeth, P.; Bereczki, L.; Petrusovski, V. M.; Papai, M.; Farkas, A.; Kótai, L. <i>Inorg. Chem.</i> <b>2022</b> , <i>61</i> , 14403. [Fe(OC(NH <sub>2</sub> ) <sub>2</sub> ) <sub>6</sub> ](MnO <sub>4</sub> ) <sub>3</sub>                            |
| 22244         | 1.607 Å | Palenik, G. J. <i>Inorg. Chem.</i> <b>1967</b> , <i>6</i> , 503. KMnO <sub>4</sub>                                                                                                                                                                                                                                                                                 |
| 61243         | 1.607 Å | Seferiadis, N.; Dubler, E.; Oswald, H. R. <i>Acta Crystallogr., Sect. C</i> <b>1986</b> , <i>42</i> , 942. [Cu(NH <sub>3</sub> ) <sub>4</sub> ](MnO <sub>4</sub> ) <sub>2</sub>                                                                                                                                                                                    |
| 391439        | 1.607 Å | Bauchert, J. M.; Strobel, S.; Glaeser, R. J.; Hasse, H.; Schleid, T. <i>Z. Anorg. Allg. Chem.</i> <b>2008</b> , <i>634</i> , 2028. [Ni(H <sub>2</sub> O) <sub>6</sub> ](MnO <sub>4</sub> ) <sub>2</sub>                                                                                                                                                            |

|             |                              |                                                                                                                                                                                                                                                                                                      |
|-------------|------------------------------|------------------------------------------------------------------------------------------------------------------------------------------------------------------------------------------------------------------------------------------------------------------------------------------------------|
| 111796      | 1.609 Å                      | Fogaca, L. A.; Kováts, É.; Németh, G.; Kamarás, K.; Béres, K. A.; Németh, P.; Petruševski, V.; Bereczki, L.; Holló, B. B.; Sajó, I. E.; Klébert, S.; Farkas, A.; Szilágyi, I. M.; Kótai, L. <i>Inorg. Chem.</i> <b>2021</b> , <i>60</i> , 3749. [Ag(NH <sub>3</sub> ) <sub>2</sub> ]MnO <sub>4</sub> |
| 61051       | 1.610 Å                      | Chang, F. M.; Jansen, M. <i>Acta Crystallogr., Sect. C</i> <b>1985</b> , <i>41</i> , 1693. NH <sub>4</sub> MnO <sub>4</sub>                                                                                                                                                                          |
| 431105      | 1.610 Å                      | Bauchert, J. M.; Henning, H.; Schleid, T. <i>Z. Naturforsch., Teil B</i> <b>2016</b> , <i>71</i> , 993. NaMnO <sub>4</sub>                                                                                                                                                                           |
| VOGVOC      | 1.610 Å                      | Whang, D.; Chung, S.-K.; Kim, K. <i>Acta Crystallogr., Sect. C</i> <b>1991</b> , <i>47</i> , 2672. ((C <sub>2</sub> H <sub>5</sub> ) <sub>4</sub> N)MnO <sub>4</sub>                                                                                                                                 |
| 67580       | 1.611 Å                      | Hursthouse, M. B.; Quillin, K. C.; Rosseinsky, D. R. <i>J. Chem. Soc., Faraday Trans.</i> <b>1992</b> , <i>88</i> , 3071. K <sub>3</sub> MnO <sub>4</sub> CrO <sub>4</sub>                                                                                                                           |
| 33776       | 1.614 Å                      | Fischer, D.; Hoppe, R. <i>Z. Anorg. Allg. Chem.</i> <b>1990</b> , <i>590</i> , 18. LiMnO <sub>4</sub> ·3H <sub>2</sub> O                                                                                                                                                                             |
| 413443      | 1.616 Å                      | Marabello, D.; Bianchi, R.; Gervasio, G.; Cargnoni, F. <i>Acta Crystallogr., Sect. A</i> <b>2004</b> , <i>60</i> , 494. KMnO <sub>4</sub>                                                                                                                                                            |
| 432612      | 1.616 Å                      | Henning, H.; Bauchert, J. M.; Conrad, M.; Schleid, T. <i>Z. Naturforsch., Teil B</i> <b>2017</b> , <i>72</i> , 555. Ba(MnO <sub>4</sub> ) <sub>2</sub>                                                                                                                                               |
| 170088      | 1.617 Å                      | Marabello, D.; Bianchi, R.; Gervasio, G.; Cargnoni, F. <i>Acta Crystallogr., Sect. A</i> <b>2004</b> , <i>60</i> , 494. KMnO <sub>4</sub>                                                                                                                                                            |
| 260045      | 1.622 Å                      | Bauchert, J. M.; Strobel, S.; Glaeser, R. J.; Hasse, H.; Schleid, T. <i>Z. Anorg. Allg. Chem.</i> <b>2008</b> , <i>634</i> , 2028. LiMnO <sub>4</sub> ·3H <sub>2</sub> O                                                                                                                             |
| 417413      | 1.622 Å                      | Bauchert, J. M.; Glaeser, R. J.; Hartenbach, I.; Hasse, H.; Schleid, T. <i>Z. Kristallogr.</i> <b>2007</b> , <i>25</i> , 20. LiMnO <sub>4</sub> ·3H <sub>2</sub> O                                                                                                                                   |
| 55420       | 1.623 Å                      | Cannon, R. D.; Jayasooriya, U. A.; Tilford, C.; Anson, C. E.; Sowrey, F. E.; Rosseinsky, D. R.; Stride, J. A.; Tasset, F.; Ressouche, E.; White, R. P.; Ballou, R. <i>Inorg. Chem.</i> <b>2004</b> , <i>43</i> , 7061. KMnO <sub>4</sub>                                                             |
| 73115       | 1.623 Å                      | Fischer, D.; Hoppe, R.; Schaefer, W.; Knight, K. S. <i>Z. Anorg. Allg. Chem.</i> <b>1993</b> , <i>619</i> , 1419. LiMnO <sub>4</sub>                                                                                                                                                                 |
| 30931       | 1.622 Å                      | Chang, F. M.; Jansen, M. <i>Z. Kristallogr.</i> <b>1984</b> , <i>169</i> , 295. AgMnO <sub>4</sub>                                                                                                                                                                                                   |
| 89505       | 1.623 Å                      | Hoppe, R.; Fischer, D.; Schneider, J. <i>Z. Anorg. Allg. Chem.</i> <b>1999</b> , <i>625</i> , 1135. LiMnO <sub>4</sub>                                                                                                                                                                               |
| 16819       | 1.630 Å                      | Prout, E. G.; Nassimbeni, L. R. <i>Nature (London)</i> <b>1966</b> , <i>211</i> , 70. CsMnO <sub>4</sub>                                                                                                                                                                                             |
| <b>Mean</b> | <b>1.610 Å/28 structures</b> |                                                                                                                                                                                                                                                                                                      |

**Pertechnate, TcO<sub>4</sub><sup>-</sup>**

| <i>ICSD/CSD code</i> | <i>d(Tc-O)</i> | <i>Reference</i>                                                                                                                                                                                                                                                                                                                                               |
|----------------------|----------------|----------------------------------------------------------------------------------------------------------------------------------------------------------------------------------------------------------------------------------------------------------------------------------------------------------------------------------------------------------------|
| 110196               | 1.676 Å        | German, K. E.; Grogorev, M. S. Kuzina, A. F.; Gulev, B. F.; Spitsyn, V. I. <i>Dokl. Akad. Nauk SSSR</i> <b>1986</b> , 287, 650. (CH <sub>3</sub> ) <sub>4</sub> NTcO <sub>4</sub>                                                                                                                                                                              |
| DUGNEY               | 1.676 Å        | German, K. E.; Grigor'ev, M. S.; Kuzina, A. F.; Gulev, B. F.; Spitsin, V. I. <i>Proc. Nat. Acad. Sci. USSR</i> <b>1986</b> , 287, 650. ((CH <sub>3</sub> ) <sub>4</sub> N)TcO <sub>4</sub>                                                                                                                                                                     |
| 255280               | 1.686 Å        | Weaver, J.; Soderquist, C. Z.; Washton, N. M.; Lipton, A. S.; Gassman, P. L.; Lukens, W. W.; Kruger, A. A.; Wall, N. A.; McCloy, J. S. <i>Inorg. Chem.</i> <b>2017</b> , 56, 2533. CsTcO <sub>4</sub>                                                                                                                                                          |
| AMUCAM               | 1.692 Å        | Noll, B.; Leibnitz, P.; Spies, H. <i>Forschungszent Rossendorf (Ber)</i> <b>1999</b> , 270, 153. [Tc(CNCH <sub>2</sub> COOCH <sub>3</sub> ) <sub>6</sub> ]TcO <sub>4</sub>                                                                                                                                                                                     |
| 39540                | 1.699 Å        | Tarasov, V. P.; Kirakosyan, G. A.; German, K. E.; Grogorev, M. S. <i>Koord. Khim.</i> <b>1991</b> , 17, 1643. CsTcO <sub>4</sub>                                                                                                                                                                                                                               |
| ORAGEW               | 1.700 Å        | Xie, R.; Shen, N.; Chen, X.; Li, J.; Wang, Y.; Zhang, C.; Xiao, C.; Chai, Z.; Wang, S. <i>Inorg. Chem.</i> <b>2021</b> , 60, 6463. (C <sub>12</sub> H <sub>21</sub> N <sub>12</sub> )(TcO <sub>4</sub> ) <sub>3</sub>                                                                                                                                          |
| 10427                | 1.703 Å        | Faggiani, R.; Lock, C. J.L.; Poce, J. <i>Acta Crystallogr., Sect. B</i> <b>1980</b> , 36, 231. NH <sub>4</sub> TcO <sub>4</sub>                                                                                                                                                                                                                                |
| WURNAB               | 1.703 Å        | Andreev, G.; Budantseva, N.; Sokolova, M.; Fedoseev, A. <i>Inorg. Chem.</i> <b>2020</b> , 59, 11357. Pu(OS(CH <sub>3</sub> ) <sub>2</sub> ) <sub>6</sub> ](TcO <sub>4</sub> )·(CH <sub>3</sub> ) <sub>2</sub> SO                                                                                                                                               |
| AYAKET               | 1.704 Å        | Xueyu Wang, X.; Ding, S.; Wang, Z.; Song, L.; Yang, X.; Xiao, Q.; Xu, H.; Wang, J.; Shen, Z.; Wang, H. <i>Inorg. Chem.</i> <b>2021</b> , 60, 10899. (HN(C <sub>6</sub> H <sub>12</sub> NO) <sub>3</sub> )TcO <sub>4</sub> ·0.5H <sub>2</sub> O                                                                                                                 |
| ORAFUL               | 1.705 Å        | Xie, R.; Shen, N.; Chen, X.; Li, J.; Wang, Y.; Zhang, C.; Xiao, C.; Chai, Z.; Wang, S. <i>Inorg. Chem.</i> <b>2021</b> , 60, 6463. (C <sub>10</sub> H <sub>16</sub> N <sub>8</sub> )(TcO <sub>4</sub> ) <sub>2</sub>                                                                                                                                           |
| 10428                | 1.708 Å        | Faggiani, R.; Lock, C. J.L.; Poce, J. <i>Acta Crystallogr., Sect. B</i> <b>1980</b> , 36, 231. NH <sub>4</sub> TcO <sub>4</sub>                                                                                                                                                                                                                                |
| YEJYEV               | 1.709 Å        | Artemjev, A. A.; Novikov, A. P.; Burkin, G. M.; Sapronov, A. A.; Kubasov, A. S.; Nenajdenko, V. G.; Khrustalev, V. N.; Borisov, A. V.; Kirichuk, A. A.; Kritchenkov, A. S.; Gomila, R. M.; Frontera, A.; Tskhovrebov, A. G. <i>Int. J. Mol. Sci.</i> <b>2022</b> , 23, 6372. (C <sub>7</sub> H <sub>4</sub> Cl <sub>3</sub> N <sub>2</sub> Se)TcO <sub>4</sub> |
| 61                   | 1.711 Å        | Krebs, B.; Hasse, K. <i>Acta Crystallogr., Sect. B</i> <b>1976</b> , 32, 1334. KTcO <sub>4</sub>                                                                                                                                                                                                                                                               |
| 10429                | 1.711 Å        | Faggiani, R.; Lock, C. J.L.; Poce, J. <i>Acta Crystallogr., Sect. B</i> <b>1980</b> , 36, 231. NH <sub>4</sub> TcO <sub>4</sub>                                                                                                                                                                                                                                |
| 243806               | 1.713 Å        | Poineau, F.; Mausolf, E.; Kerlin, W.; Czerwinski, K. <i>J. Radioanal. Nucl. Chem.</i> <b>2017</b> , 311, 775. [Co(NH <sub>3</sub> ) <sub>6</sub> ](TcO <sub>4</sub> ) <sub>3</sub> ·H <sub>2</sub> O                                                                                                                                                           |
| 365                  | 1.714 Å        | Mayer, G.; Hoppe, R. <i>Z. Allg. Anorg. Chem.</i> <b>1976</b> , 420, 40. CsTcO <sub>4</sub>                                                                                                                                                                                                                                                                    |
| YEJYUL               | 1.716 Å        | Artemjev, A. A.; Novikov, A. P.; Burkin, G. M.; Sapronov, A. A.; Kubasov, A. S.; Nenajdenko, V. G.; Khrustalev, V. N.; Borisov, A. V.; Kirichuk, A. A.; Kritchenkov, A. S.; Gomila, R. M.; Frontera, A.; Tskhovrebov, A. G. <i>Int. J. Mol. Sci.</i> <b>2022</b> , 23, 6372. (C <sub>7</sub> H <sub>6</sub> ClN <sub>2</sub> Se)TcO <sub>4</sub>               |

|             |                              |                                                                                                                                                                                                                                                                                                                                                         |
|-------------|------------------------------|---------------------------------------------------------------------------------------------------------------------------------------------------------------------------------------------------------------------------------------------------------------------------------------------------------------------------------------------------------|
| YEJYUL      | 1.716 Å                      | Artemjev, A. A.; Novikov, A. P.; Burkin, G. M.; Sapronov, A. A.; Kubasov, A. S.; Nenajdenko, V. G.; Khrustalev, V. N.; Borisov, A. V.; Kirichuk, A. A.; Kritchenkov, A. S.; Gomila, R. M.; Frontera, A.; Tskhovrebov, A. G. <i>Int. J. Mol. Sci.</i> <b>2022</b> , <i>23</i> , 6372. (C <sub>7</sub> H <sub>6</sub> FN <sub>2</sub> Se)TcO <sub>4</sub> |
| GEQHUJ      | 1.717 Å                      | Novikov, A. P.; German, K. E.; Safonov, A. V.; Grigoriev, M. S. <i>Chem. Sel.</i> <b>2022</b> , <i>7</i> , e2022028. (C <sub>5</sub> H <sub>5</sub> N <sub>5</sub> O)TcO <sub>4</sub>                                                                                                                                                                   |
| 243964      | 1.718 Å                      | German, K. E.; Grigoriev, M. S., Garashchenko, B. L.; Kopytin, A. V.; Tyupina, E. A. <i>Acta Crystallogr., Sect. E</i> <b>2017</b> , <i>73</i> , 1037. NaTcO <sub>4</sub>                                                                                                                                                                               |
| 11774       | 1.720 Å                      | Kennedy, B. J.; Injac, S.; Thorogood, G. J.; Brand, H. E. A.; Poineau, F. <i>Inorg. Chem.</i> <b>2019</b> , <i>58</i> , 10119. CsTcO <sub>4</sub>                                                                                                                                                                                                       |
| 243963      | 1.721 Å                      | German, K. E.; Grigoriev, M. S., Garashchenko, B. L.; Kopytin, A. V.; Tyupina, E. A. <i>Acta Crystallogr., Sect. E</i> <b>2017</b> , <i>73</i> , 1037. NaTcO <sub>4</sub>                                                                                                                                                                               |
| 141005      | 1.723 Å                      | Reynolds, E. M.; Yu, M.; Thorogood, G. J.; Brand, H. E. A.; Poineau, F.; Kennedy, B. J. <i>J. Solid State Chem.</i> <b>2019</b> , <i>274</i> , 64. NH <sub>4</sub> TcO <sub>4</sub>                                                                                                                                                                     |
| 255279      | 1.723 Å                      | Weaver, J.; Soderquist, C, Z.; Washton, N. M.; Lipton, A. S.; Gassman, P. L.; Lukens, W. W.; Kruger, A. A.; Wall, N. A.; McCloy, J. S. <i>Inorg. Chem.</i> <b>2017</b> , <i>56</i> , 2533. RbTcO <sub>4</sub>                                                                                                                                           |
| 11774       | 1.732 Å                      | Kennedy, B. J.; Injac, S.; Thorogood, G. J.; Brand, H. E. A.; Poineau, F. <i>Inorg. Chem.</i> <b>2019</b> , <i>58</i> , 10119. KTcO <sub>4</sub>                                                                                                                                                                                                        |
| 255277      | 1.737 Å                      | Weaver, J.; Soderquist, C, Z.; Washton, N. M.; Lipton, A. S.; Gassman, P. L.; Lukens, W. W.; Kruger, A. A.; Wall, N. A.; McCloy, J. S. <i>Inorg. Chem.</i> <b>2017</b> , <i>56</i> , 2533. NaTcO <sub>4</sub>                                                                                                                                           |
| 255278      | 1.739 Å                      | Weaver, J.; Soderquist, C, Z.; Washton, N. M.; Lipton, A. S.; Gassman, P. L.; Lukens, W. W.; Kruger, A. A.; Wall, N. A.; McCloy, J. S. <i>Inorg. Chem.</i> <b>2017</b> , <i>56</i> , 2533. KTcO <sub>4</sub>                                                                                                                                            |
| 11779       | 1.741 Å                      | Kennedy, B. J.; Injac, S.; Thorogood, G. J.; Brand, H. E. A.; Poineau, F. <i>Inorg. Chem.</i> <b>2019</b> , <i>58</i> , 10119. KTcO <sub>4</sub>                                                                                                                                                                                                        |
| 11775       | 1.744 Å                      | Kennedy, B. J.; Injac, S.; Thorogood, G. J.; Brand, H. E. A.; Poineau, F. <i>Inorg. Chem.</i> <b>2019</b> , <i>58</i> , 10119. RbTcO <sub>4</sub>                                                                                                                                                                                                       |
| JUVJUF      | 1.746 Å                      | John, C. S.; Costello, C. E.; Schlemper, E. O. <i>Polyhedron</i> <b>1992</b> , <i>11</i> , 2651. [Sn(C <sub>6</sub> H <sub>12</sub> NS) <sub>3</sub> ]TcO <sub>4</sub> ·CHCl <sub>3</sub>                                                                                                                                                               |
| <b>Mean</b> | <b>1.713 Å/30 structures</b> |                                                                                                                                                                                                                                                                                                                                                         |

**Perrhenate, ReO<sub>4</sub><sup>-</sup>**

| <i>ICSD/CSD code</i> | <i>d(Re-O)</i> | <i>Reference</i>                                                                                                                                                                                                                                                                                                                                                       |
|----------------------|----------------|------------------------------------------------------------------------------------------------------------------------------------------------------------------------------------------------------------------------------------------------------------------------------------------------------------------------------------------------------------------------|
| ROLMUC01             | 1.650 Å        | Volkov, M. A.; Novikov, A. P.; Grigoriev, M. S.; Kuznetsov, V. V.; Sitanskaia, A. V.; Belova, E. V.; Afanasiev, A. V.; Nevolin, I. M.; German, K. E. <i>Int. J. Mol. Sci.</i> <b>2023</b> , <i>24</i> , 2015. (( <i>n</i> -C <sub>4</sub> H <sub>9</sub> ) <sub>4</sub> N)ReO <sub>4</sub>                                                                             |
| TEPQOW               | 1.650 Å        | Lum, R.; Zhang, H.; Bai, S.; Zhang, W.; Zhao, J.; Hor, T. S. A. <i>Dalton Trans.</i> <b>2013</b> , <i>42</i> , 871. [Re(O)OH(C <sub>13</sub> H <sub>20</sub> N <sub>4</sub> ) <sub>2</sub> ](ReO <sub>4</sub> ) <sub>0.6</sub> (PF <sub>6</sub> ) <sub>1.4</sub>                                                                                                       |
| CIRPOM               | 1.653 Å        | Li, L.; Zhao, Y.; Zhou, Y.; Bai, W. Z. <i>Anorg. Allg. Chem.</i> <b>2023</b> , <i>649</i> , e202300114. [ReC <sub>59</sub> H <sub>59</sub> Cl <sub>2</sub> P <sub>3</sub> ]ReO <sub>4</sub>                                                                                                                                                                            |
| LOYBOQ               | 1.653 Å        | Whitmire, K. H.; Derringer, D. R.; Kongkasuwan, K. R. <i>Acta Crystallogr., Sect. E</i> <b>2002</b> , <i>58</i> , m363. [Re(P((C <sub>6</sub> H <sub>5</sub> ) <sub>2</sub> ) <sub>2</sub> ) <sub>3</sub> ]ReO <sub>4</sub>                                                                                                                                            |
| KIYZOP               | 1.653 Å        | Breimair, J.; Robl, C.; Beck, W. <i>J. Organometal. Chem.</i> <b>1991</b> , <i>411</i> , 395. [CO <sub>3</sub> (Re(CO) <sub>5</sub> ) <sub>3</sub> ]ReO <sub>4</sub> ·[Re <sub>4</sub> (OH) <sub>4</sub> (CO) <sub>12</sub> ]                                                                                                                                          |
| UZURAJ               | 1.654 Å        | Abate, A.; Marti-Rujas, J.; Metrangolo, P.; Pilati, T.; Resnati, G.; Terraneo, G. <i>Cryst. Growth Des.</i> <b>2011</b> , <i>11</i> , 4220. (( <i>n</i> -C <sub>4</sub> H <sub>9</sub> ) <sub>4</sub> N) <sub>2</sub> (ReO <sub>4</sub> ) <sub>2</sub> ·3C <sub>6</sub> F <sub>4</sub> I <sub>2</sub>                                                                  |
| BOYMUA               | 1.655 Å        | Liu, H.; Hadzovic, A. CCDC deposition number 1973603, <b>2019</b> . [Re(P(C <sub>6</sub> H <sub>5</sub> ) <sub>3</sub> ) <sub>2</sub> Cl(ON <sub>2</sub> C <sub>11</sub> H <sub>13</sub> )]ReO <sub>4</sub>                                                                                                                                                            |
| RUWNEE               | 1.655 Å        | Gryca, I.; Machura, B.; Malecki, J. G.; Kusz, J.; Shul'pina, L. S.; Ikonnikov, N. S.; Shul'pin, G. B. <i>Dalton Trans.</i> <b>2016</b> , <i>45</i> , 334. [ReBr(P(C <sub>6</sub> H <sub>5</sub> ) <sub>3</sub> ) <sub>2</sub> (NC <sub>6</sub> H <sub>4</sub> (CH <sub>3</sub> ))(NOC <sub>13</sub> H <sub>4</sub> N <sub>3</sub> )]ReO <sub>4</sub>                   |
| GADFUM               | 1.657 Å        | Miranda, J. M.; Oliveira, M. A.; Castellano, E. E.; Scoralick, E.; Zinner, L. B.; Vicentini, G. <i>Inorg. Chim. Acta</i> <b>1987</b> , <i>139</i> , 131. ([Ho <sub>2</sub> Re <sub>2</sub> C <sub>24</sub> H <sub>60</sub> O <sub>26</sub> S <sub>12</sub> ](ReO <sub>4</sub> ) <sub>4</sub> ·C <sub>4</sub> H <sub>8</sub> O <sub>2</sub> S <sub>2</sub>              |
| LOJHIB               | 1.658 Å        | Tomura, M.; Yamashita, Y. <i>CrystEngComm</i> <b>2000</b> , <i>2</i> , 86. (C <sub>28</sub> H <sub>14</sub> F <sub>4</sub> S <sub>4</sub> )ReO <sub>4</sub>                                                                                                                                                                                                            |
| KIJMIA               | 1.660 Å        | Engelbrecht, H. P.; Jurisson, S. S.; Cutler, C. S.; den Drijver, L.; Roodt, A. <i>Synth. React. Inorg., Met.-Org., Nano-Met. Chem.</i> <b>2005</b> , <i>35</i> , 83. [ReCl <sub>2</sub> (P(CH <sub>3</sub> ) <sub>2</sub> (CH <sub>2</sub> ) <sub>2</sub> P(CH <sub>3</sub> ) <sub>2</sub> ) <sub>2</sub> ]ReO <sub>4</sub>                                            |
| BONGIU               | 1.660 Å        | Suescun, L.; Momburu, A. W.; Mariezcurrena, R. A.; Kremer, C.; Rivero, M.; Kremer, E.; Dominguez, S.; Mederos, A. <i>Acta Crystallogr., Sect. C</i> <b>1999</b> , <i>55</i> , 1785. [Re(O) <sub>2</sub> (P <sub>2</sub> C <sub>27</sub> H <sub>26</sub> ) <sub>2</sub> ](ReO <sub>4</sub> ) <sub>0.83</sub> I <sub>0.17</sub> ·CH <sub>3</sub> OH·0.17H <sub>2</sub> O |
| BOWMOQ04             | 1.660 Å        | Shao, X.; Yoshida, Y.; Nakano, Y.; Yamochi, H.; Sakata, M.; Maesato, M.; Otsuka, A.; Saito, G.; Koshihara, S. <i>Chem. Mater.</i> <b>2009</b> , <i>21</i> , 1085. (C <sub>9</sub> H <sub>8</sub> O <sub>2</sub> S <sub>4</sub> )ReO <sub>4</sub> ·C <sub>9</sub> H <sub>8</sub> O <sub>2</sub> S <sub>4</sub>                                                          |
| GISNAX               | 1.660 Å        | Drew, M. G. B.; Felix, V.; Goncalves, I. S.; Kuhn, F. E.; Lopes, A. D.; Romao, C. C. <i>Polyhedron</i> <b>1998</b> , <i>17</i> , 1091. [Mo(CO) <sub>2</sub> (C <sub>5</sub> H <sub>5</sub> )(C <sub>6</sub> H <sub>6</sub> N <sub>4</sub> )]ReO <sub>4</sub>                                                                                                           |
| TAQQIP               | 1.661 Å        | Dobbelaar, E.; Jakobsen, V. B.; Trzop, E.; Lee, M.; Chikara, S.; Ding, X.; Muller-Bunz, H.; Esien, K.; Felton, S.; Carpenter, E.; Collet, E.; Morgan, G. G.; Zapf, V. S. <i>Angew. Chem., Int. Ed.</i> <b>2022</b> , <i>61</i> , e202114021. [MnC <sub>22</sub> H <sub>28</sub> N <sub>4</sub> O <sub>2</sub> ]ReO <sub>4</sub>                                        |



|        |         |                                                                                                                                                                                                                                                                                                                                                                          |
|--------|---------|--------------------------------------------------------------------------------------------------------------------------------------------------------------------------------------------------------------------------------------------------------------------------------------------------------------------------------------------------------------------------|
| BONGOA | 1.662 Å | Suescun, L.; Mombru, A. W.; Mariezcurrena, R. A.; Kremer, C.; Rivero, M.; Kremer, E.; Dominguez, S.; Mederos, A. <i>Acta Crystallogr., Sect. C</i> <b>1999</b> , <i>55</i> , 1785.<br>[Re(O) <sub>2</sub> (P <sub>2</sub> C <sub>27</sub> H <sub>26</sub> ) <sub>2</sub> ](ReO <sub>4</sub> ) <sub>0.64</sub> I <sub>0.36</sub> ·CH <sub>3</sub> OH·0.36H <sub>2</sub> O |
| CAVNES | 1.664 Å | Kobayashi, H.; Kobayashi, A.; Sasaki, Y.; Saito, G.; Inokuchi, H. <i>Bull. Chem. Soc. Jpn.</i> <b>1983</b> , <i>56</i> , 2894.<br>(C <sub>10</sub> H <sub>12</sub> Se <sub>4</sub> )ReO <sub>4</sub> ·Cl <sub>2</sub> HCCH <sub>2</sub> Cl                                                                                                                               |
| ILAPES | 1.664 Å | Kovalev, V. V.; Gorbunova, Y. E.; Kozyukhin, S. A.; Kokunov, Y. V. <i>Koord. Khim.</i> <b>2015</b> , <i>41</i> , 332.<br>[Ag <sub>2</sub> C <sub>12</sub> H <sub>30</sub> N <sub>6</sub> ] <sub>n</sub> (ReO <sub>4</sub> ) <sub>2</sub>                                                                                                                                 |
| GEZKEF | 1.665 Å | Bloch, W. M.; Horiuchi, S.; Holstein, J. J.; Drechsler, C.; Wuttke, A.; Hiller, W.; Mata, R. A.; Clever, G. H. <i>Chem. Sci.</i> <b>2023</b> , <i>14</i> , 1524. [Pd <sub>2</sub> C <sub>160</sub> H <sub>124</sub> N <sub>12</sub> ] <sub>2</sub> (ReO <sub>4</sub> ) <sub>2</sub> (NO <sub>3</sub> ) <sub>2</sub>                                                      |
| KIWPOV | 1.665 Å | McGhee, E. M.; Hoffman, B. M.; Ibers, J. A. <i>Inorg. Chem.</i> <b>1991</b> , <i>30</i> , 2161.<br>[Pd(N <sub>4</sub> C <sub>24</sub> H <sub>20</sub> )ReO <sub>4</sub> ·[Pd(N <sub>4</sub> C <sub>24</sub> H <sub>20</sub> )]                                                                                                                                           |
| KEXSEL | 1.666 Å | Herrmann, W. A.; Kuchler, J. G.; Kiprof, P.; Riede, J. <i>J. Organometal. Chem.</i> <b>1990</b> , <i>395</i> , 55.<br>(C <sub>18</sub> H <sub>25</sub> N <sub>2</sub> )ReO <sub>4</sub>                                                                                                                                                                                  |
| ONELIF | 1.666 Å | Li, C.-P.; Zhou, H.; Wang, J.-J.; Liu, B.-L.; Wang, S.; Yang, X.; Wang, Z.-L.; Liu, C.-S.; Du, M.; Zhou, W. <i>ACS Appl. Mater. Interfaces</i> <b>2019</b> , <i>11</i> , 42375. [AgC <sub>17</sub> H <sub>12</sub> N <sub>6</sub> ] <sub>n</sub> ReO <sub>4</sub>                                                                                                        |
| IVAKIZ | 1.668 Å | John, G. H.; May, I.; Sarsfield, M. J.; Steele, H. M.; Collison, D.; Helliwell, M.; McKinne, J. D. <i>Dalton Trans.</i> <b>2004</b> , 734. [((C <sub>6</sub> H <sub>5</sub> ) <sub>3</sub> PO) <sub>3</sub> UO <sub>2</sub> (O) <sub>2</sub> UO <sub>2</sub> (OP(C <sub>6</sub> H <sub>5</sub> )) <sub>3</sub> ](ReO <sub>4</sub> ) <sub>2</sub>                         |
| SAYXAV | 1.668 Å | Feng, H.; Xiong, X.; Gong, L.; Zhang, H.; Xu, Y.; Feng, X.; Luo, F. <i>Nano Res.</i> <b>2022</b> , <i>15</i> , 1472.<br>[Re <sub>3</sub> Th <sub>3</sub> C <sub>27</sub> H <sub>20</sub> N <sub>9</sub> O <sub>22</sub> ] <sub>2</sub> ReO <sub>4</sub>                                                                                                                  |
| NUJZAW | 1.668 Å | Xu, L.; Zhang, D.; Ronson, T.; Nitschke, J. <i>Angew. Chem., Int. Ed.</i> <b>2020</b> , <i>59</i> , 7435.<br>[Zn <sub>4</sub> C <sub>228</sub> H <sub>156</sub> N <sub>36</sub> O <sub>12</sub> ] <sub>2</sub> ReO <sub>4</sub> (N(CSO <sub>2</sub> CF <sub>3</sub> ) <sub>2</sub> ) <sub>5</sub> ·CH <sub>3</sub> CN                                                    |
| QUXROR | 1.668 Å | Toumi Akriche, S.; Al Othman, Z. A.; Rzaigui, M.; Mahfouz, R. M. <i>Acta Crystallogr., Sect. E</i> <b>2010</b> , <i>66</i> , m816. [Co(N <sub>2</sub> C <sub>12</sub> H <sub>8</sub> ) <sub>3</sub> ](ReO <sub>4</sub> ) <sub>2</sub> ·H <sub>2</sub> O                                                                                                                  |
| FASLEU | 1.669 Å | Zhang, D.; Gan, Q.; Plajer, A. J.; Lavendomme, R.; Ronson, T. R. Lu, Z.; Jensen, J. D.; Laursen, B. W.; Nitschke, J. R. <i>J. Am. Chem. Soc.</i> <b>2022</b> , <i>144</i> , 1106. [Fe <sub>2</sub> C <sub>189</sub> H <sub>132</sub> N <sub>21</sub> O <sub>6</sub> ](ReO <sub>4</sub> ) <sub>2.6</sub> (BF <sub>4</sub> ) <sub>4.4</sub> ·3CH <sub>3</sub> CN           |
| DAGVAM | 1.669 Å | Belaj, F.; Schachner, J. A.; Mosch-Zanetti, N. C. CCDC deposition number 2113424, <b>2021</b> .<br>[Re <sub>2</sub> C <sub>45</sub> H <sub>48</sub> N <sub>5</sub> O <sub>10</sub> ](ReO <sub>4</sub> ) <sub>0.68</sub> (CF <sub>3</sub> SO <sub>3</sub> ) <sub>0.32</sub>                                                                                               |
| HIRRAB | 1.671 Å | Abram, U.; Voigt, A.; Kirmse, R.; Ortner, K.; Hubener, R.; Carballo, R.; Vazquez-Lopez, E. <i>Z. Anorg. Allg. Chem.</i> <b>1998</b> , <i>624</i> , 1662. [Re(O)Cl <sub>2</sub> (OP(C <sub>6</sub> H <sub>5</sub> ) <sub>3</sub> ) <sub>3</sub> ] <sub>2</sub> ReO <sub>4</sub> ·0.5C <sub>2</sub> H <sub>5</sub> OH                                                      |
| FUSGUW | 1.672 Å | Sharutin, V. V.; Senchurin, V. S.; Fastovets, O. A.; Pakusina, A. P.; Sharutina, O. K. <i>Russ. J. Inorg. Chem.</i> <b>2009</b> , <i>54</i> , 436. (Sb(C <sub>6</sub> H <sub>5</sub> ) <sub>4</sub> )ReO <sub>4</sub>                                                                                                                                                    |
| LUCVIQ | 1.672 Å | Schoultz, X.; Gerber, T. I. A.; Hosten, E.; Betz, R.; Rhyman, L.; Ramasami, P. <i>Polyhedron</i> <b>2015</b> , <i>96</i> , 6.<br>[ReC <sub>47</sub> H <sub>44</sub> Cl <sub>2</sub> N <sub>2</sub> OP <sub>2</sub> ] <sub>2</sub> ReO <sub>4</sub> ·H <sub>2</sub> O                                                                                                     |

|          |         |                                                                                                                                                                                                                                                                                                                                                                                       |
|----------|---------|---------------------------------------------------------------------------------------------------------------------------------------------------------------------------------------------------------------------------------------------------------------------------------------------------------------------------------------------------------------------------------------|
| MIGBUZ   | 1.672 Å | Gardberg, A. S.; Sprauve, A. E.; Ibers, J. A. <i>Inorg. Chim. Acta</i> <b>2002</b> , 328, 179.<br>[Ni(N <sub>4</sub> C <sub>16</sub> H <sub>8</sub> ) <sub>2</sub> ] <sub>2</sub> (ReO <sub>4</sub> ) <sub>2</sub> ·[Ni(N <sub>4</sub> C <sub>16</sub> H <sub>8</sub> ) <sub>2</sub> ]·C <sub>10</sub> H <sub>7</sub> Cl                                                              |
| SAFBIK   | 1.672 Å | Gable, K. P.; Zhuravlev, F. A. Yokochi, A. F. T. <i>Chem. Commun.</i> <b>1998</b> , 799.<br>[ReC <sub>30</sub> H <sub>45</sub> O <sub>9</sub> ]ReO <sub>4</sub> ·CH <sub>3</sub> CN                                                                                                                                                                                                   |
| HIQWAJ   | 1.674 Å | Bagchi, S.; Kamilya, S.; Mehta, S.; Mandal, S.; Bandyopadhyay, A.; Narayan, A.; Ghosh, S.; Mondal, A. <i>Dalton Trans.</i> <b>2023</b> , 52, 11335. [MnC <sub>22</sub> H <sub>26</sub> Br <sub>2</sub> N <sub>4</sub> O <sub>2</sub> ]ReO <sub>4</sub>                                                                                                                                |
| VUDSUI   | 1.675 Å | Ara, I.; Fanwick, P. E.; Walton, R. A. <i>Polyhedron</i> <b>1992</b> , 11, 1277; Ara, I.; Fanwick, P. E.; Walton, R. A. <i>J. Cluster Sci</i> <b>1992</b> , 3, 83. [Re <sub>2</sub> Br <sub>3</sub> C <sub>62</sub> H <sub>55</sub> NO <sub>2</sub> P <sub>5</sub> ]ReO <sub>4</sub> ·2CH <sub>2</sub> Cl <sub>2</sub>                                                                |
| JECGON10 | 1.675 Å | Godfrey, M. R.; Newcomb, T. P.; Hoffman, B. M.; Ibers, J. A. <i>J. Am. Chem. Soc.</i> <b>1990</b> , 112, 7260.<br>[CuN <sub>4</sub> C <sub>33</sub> H <sub>17</sub> N <sub>3</sub> ] <sub>2</sub> (ReO <sub>4</sub> ) <sub>2</sub> ·[CuN <sub>4</sub> C <sub>33</sub> H <sub>17</sub> N <sub>3</sub> ]·C <sub>10</sub> H <sub>7</sub> Cl                                              |
| MICWOL   | 1.675 Å | Nieto, S.; Perez, J.; Riera, L.; Riera, V.; Miguel, D.; Golen, J. A.; Rheingold, A. L. <i>Inorg. Chem.</i> <b>2007</b> , 46, 3407. [Mn(CO) <sub>3</sub> (NC <sub>7</sub> H <sub>6</sub> N) <sub>3</sub> ](ReO <sub>4</sub> ) <sub>2</sub> ·3C <sub>4</sub> H <sub>8</sub> O                                                                                                           |
| RUWHIC   | 1.675 Å | Gryca, I.; Machura, B.; Malecki, J. G.; Kusz, J.; Shul'pina, L. S.; Ikonnikov, N. S.; Shul'pin, G. B. <i>Dalton Trans.</i> <b>2016</b> , 45, 334. [ReCl(P(C <sub>6</sub> H <sub>5</sub> ) <sub>3</sub> ) <sub>2</sub> (NC <sub>6</sub> H <sub>4</sub> (CH <sub>3</sub> ))(NOC <sub>13</sub> H <sub>10</sub> N <sub>3</sub> O)]ReO <sub>4</sub>                                        |
| SOKHOS   | 1.676 Å | Mei, L.; Li, F.-Z.; Lan, J.-H.; Wang, C.-Z.; Xu, C.; Deng, H.; Wu, Q.-Y.; Hu, K.-Q.; Wang, L.; Chai, Z.-F.; Chen, J.; Gibson, J. K.; Sh, W.-Q. <i>Nature Chem.</i> <b>2019</b> , 10, 1532.<br>[Cu(H <sub>2</sub> O) <sub>4</sub> (NC <sub>10</sub> H <sub>12</sub> N) <sub>2</sub> ](ReO <sub>4</sub> ) <sub>2</sub> ·C <sub>48</sub> H <sub>48</sub> N <sub>32</sub> O <sub>16</sub> |
| VOVMUO   | 1.676 Å | Hesse, D.; Roesky, H. W.; Noltemeyer, M. <i>Chem. Ber.</i> <b>1992</b> , 125, 833. (C <sub>62</sub> H <sub>48</sub> P <sub>2</sub> )(ReO <sub>4</sub> ) <sub>2</sub> ·5CHCl <sub>3</sub>                                                                                                                                                                                              |
| AFEYER   | 1.677 Å | Maruk, A. Y.; Grogorev, M. S.; German, K. E. <i>Koord. Khim.</i> <b>2013</b> , 39, 264. [Ag(C <sub>12</sub> H <sub>8</sub> N <sub>2</sub> ) <sub>2</sub> (H <sub>2</sub> O)]ReO <sub>4</sub>                                                                                                                                                                                          |
| HAGWAO   | 1.677 Å | Farrell, D.; Gloe, K.; Gloe, K.; Goretzki, G.; McKee, V.; Nelson, J.; Nieuwenhuyzen, M.; Pal, I.; Stephan, H.; Town, R. M.; Wichmann, K. <i>Dalton Trans.</i> <b>2003</b> , 1961. (C <sub>33</sub> H <sub>57</sub> N <sub>2</sub> ) <sub>2</sub> (ReO <sub>4</sub> ) <sub>10</sub> (ClO <sub>4</sub> ) <sub>2</sub> ·3H <sub>2</sub> O                                                |
| CIWVOV   | 1.677 Å | Ruth, K.; Morawitz, T.; Lerner, H.-W.; Bolte, M. <i>Acta Crystallogr., Sect. E</i> <b>2008</b> , 64, m496.<br>[OH(Re(CO) <sub>3</sub> (N <sub>2</sub> C <sub>10</sub> H <sub>8</sub> )) <sub>2</sub> ]ReO <sub>4</sub>                                                                                                                                                                |
| QOLQAJ   | 1.677 Å | Xu, L.; Perrero, J.; Patrick, B. O.; Orvig, C. <i>Inorg. Chem.</i> <b>2001</b> , 40, 2005.<br>[ReCl(N <sub>2</sub> C <sub>14</sub> H <sub>17</sub> N <sub>2</sub> )(O <sub>2</sub> C <sub>6</sub> H <sub>5</sub> O)]ReO <sub>4</sub>                                                                                                                                                  |
| JEWKAX   | 1.678 Å | Cotton, F. A.; Jennings, J. G.; Price, A. C.; Vidyasagar, K. <i>Inorg. Chem.</i> <b>1990</b> , 29, 4138.<br>[(ReCl <sub>2</sub> (P(CH <sub>3</sub> ) <sub>3</sub> ) <sub>2</sub> ) <sub>2</sub> ]ReO <sub>4</sub>                                                                                                                                                                     |
| JOVTOF   | 1.678 Å | Schoultz, X.; Gerber, T. I. A.; Betz, R.; Hosten, E. C. <i>Inorg. Chem. Commun.</i> <b>2014</b> , 47, 162.<br>[Re(O) <sub>2</sub> (CNC <sub>6</sub> H <sub>11</sub> ) <sub>2</sub> (P(C <sub>6</sub> H <sub>5</sub> ) <sub>3</sub> ) <sub>2</sub> ]ReO <sub>4</sub>                                                                                                                   |
| BEZTEJ   | 1.679 Å | Daolio, A.; Pizzi, A.; Calabrese, M.; Demitri, N.; Murray, J. S.; Politzer, P.; Resnati, G. <i>Cryst. Growth Des.</i> <b>2023</b> , 23, 574. (C <sub>4</sub> H <sub>7</sub> N <sub>2</sub> )ReO <sub>4</sub>                                                                                                                                                                          |
| HIQWUD01 | 1.679 Å | Bagchi, S.; Kamilya, S.; Mehta, S.; Mandal, S.; Bandyopadhyay, A.; Narayan, A.; Ghosh, S.; Mondal, A. <i>Dalton Trans.</i> <b>2023</b> , 52, 11335. [MnC <sub>22</sub> H <sub>26</sub> N <sub>6</sub> O <sub>6</sub> ]ReO <sub>4</sub>                                                                                                                                                |

|          |         |                                                                                                                                                                                                                                                                                                                                                                                                |
|----------|---------|------------------------------------------------------------------------------------------------------------------------------------------------------------------------------------------------------------------------------------------------------------------------------------------------------------------------------------------------------------------------------------------------|
| PITYOU   | 1.679 Å | Nishijo, J.; Enomoto, M. <i>Inorg. Chem.</i> <b>2013</b> , <i>52</i> , 13263. [CrC <sub>32</sub> H <sub>38</sub> N <sub>4</sub> S <sub>12</sub> ](ReO <sub>4</sub> ) <sub>2</sub> ·2C <sub>6</sub> H <sub>5</sub> Cl·CH <sub>3</sub> CN                                                                                                                                                        |
| GERJAP   | 1.680 Å | Alegria, F. C. B.; Martins, L. M. D. R. S.; Haukka, M.; Pombeiro, A. J. L. <i>Dalton Trans.</i> <b>2006</b> , 4954. [ReC <sub>16</sub> H <sub>18</sub> N <sub>8</sub> O <sub>5</sub> S]ReO <sub>4</sub>                                                                                                                                                                                        |
| KAZQIL   | 1.680 Å | Perez-Benitez, A.; Rovira, C.; Veciana, J.; Vidal-Gancedo, J.; Laukhin, V. N.; Zorina, L.V.; Khasanov, S. S.; Narymbetov, B. Z.; Shibaeva, R. P. M. <i>Synth. Met.</i> <b>1999</b> , <i>102</i> , 1707. (C <sub>10</sub> H <sub>8</sub> S <sub>6</sub> ) <sub>2</sub> (ReO <sub>4</sub> ) <sub>2</sub> ·C <sub>10</sub> H <sub>8</sub> S <sub>6</sub>                                          |
| KAZQIL01 | 1.680 Å | Khasanov, S. S.; Perez-Benitez, A.; Narymbetov, B. Z.; Zorina, L.V.; Shibaeva, R. P.; Singleton, J.; Klehe, A.-K.; Laukhin, V. N.; Vidal-Gancedo, J.; Veciana, J.; Canadell, E.; Rovira, C. <i>J. Mater Chem.</i> <b>2002</b> , <i>12</i> , 432. (C <sub>10</sub> H <sub>8</sub> S <sub>6</sub> ) <sub>2</sub> (ReO <sub>4</sub> ) <sub>2</sub> ·C <sub>10</sub> H <sub>8</sub> S <sub>6</sub> |
| NACBAV   | 1.680 Å | Antonioli, B.; Gloe, K.; Gloe, K.; Goretzki, G.; Grotjahn, M.; Hesske, H.; Langer, M.; Lindoy, L. F.; Mills, A. M.; Sohnel, T. <i>Z. Anorg. Allg. Chem.</i> <b>2004</b> , <i>630</i> , 998. (NH((CH <sub>2</sub> ) <sub>2</sub> NHCH <sub>2</sub> C <sub>6</sub> H <sub>5</sub> ) <sub>3</sub> )Cl <sub>3</sub> ReO <sub>4</sub>                                                               |
| SILLAA   | 1.680 Å | Saito, K.; Ishikawa, Y.; Ishibashi, M.; Kikuchi, K.; Kobayashi, K.; Ikemoto, I. <i>Bull Chem. Soc. Jpn.</i> <b>1990</b> , <i>63</i> , 1865. (C <sub>10</sub> H <sub>10</sub> S <sub>4</sub> Se <sub>2</sub> )ReO <sub>4</sub> ·C <sub>10</sub> H <sub>10</sub> S <sub>4</sub> Se <sub>2</sub>                                                                                                  |
| 52337    | 1.682 Å | Beintema, J. <i>Strukturber.</i> <b>1937</b> , <i>3</i> , 421. NaReO <sub>4</sub>                                                                                                                                                                                                                                                                                                              |
| DUGNIC02 | 1.682 Å | Volkov, M. A.; Novikov, A. P.; Grigoriev, M. S.; Kuznetsov, V. V.; Sitanskaia, A. V.; Belova, E. V.; Afanasiev, A. V.; Nevolin, I. M.; German, K. E. <i>Int. J. Mol. Sci.</i> <b>2023</b> , <i>24</i> , 2015. ((CH <sub>3</sub> ) <sub>4</sub> N)ReO <sub>4</sub>                                                                                                                              |
| HIQWEN02 | 1.682 Å | Bagchi, S.; Kamilya, S.; Mehta, S.; Mandal, S.; Bandyopadhyay, A.; Narayan, A.; Ghosh, S.; Mondal, A. <i>Dalton Trans.</i> <b>2023</b> , <i>52</i> , 11335. [MnC <sub>22</sub> H <sub>26</sub> Cl <sub>2</sub> N <sub>4</sub> O <sub>2</sub> ]ReO <sub>4</sub>                                                                                                                                 |
| ROLMUC   | 1.682 Å | Fronczek, F. R. CCDC deposition number 1028434, <b>2014</b> . ((n-C <sub>4</sub> H <sub>9</sub> ) <sub>4</sub> N)ReO <sub>4</sub>                                                                                                                                                                                                                                                              |
| RUWNUU   | 1.682 Å | Gryca, I.; Machura, B.; Malecki, J. G.; Kusz, J.; Shul'pina, L. S.; Ikonnikov, N. S.; Shul'pin, G. B. <i>Dalton Trans.</i> <b>2016</b> , <i>45</i> , 334. [ReBr(P(C <sub>6</sub> H <sub>5</sub> ) <sub>3</sub> ) <sub>2</sub> (NC <sub>6</sub> H <sub>4</sub> (CH <sub>3</sub> ))(NOC <sub>13</sub> H <sub>8</sub> NS)]ReO <sub>4</sub>                                                        |
| TEHYAH   | 1.682 Å | Machura, B.; Kruszynski, R.; Jaworska, M. <i>Polyhedron</i> <b>2006</b> , <i>25</i> , 1111. [Re(O)Cl <sub>2</sub> (NC <sub>3</sub> H <sub>4</sub> N) <sub>2</sub> (OAs(C <sub>6</sub> H <sub>5</sub> ) <sub>3</sub> )ReO <sub>4</sub>                                                                                                                                                          |
| MECVOJ   | 1.683 Å | Georgieva, I.; Kossev, K.; Titorenkova, R.; Petrova, N.; Zahariev, T.; Nikolova, R. <i>J. Solid State Chem.</i> <b>2022</b> , <i>312</i> , 123263. [Mg(OC(NH <sub>2</sub> ) <sub>2</sub> ) <sub>6</sub> ](ReO <sub>4</sub> ) <sub>2</sub>                                                                                                                                                      |
| MICVOK   | 1.683 Å | Nieto, S.; Perez, J.; Riera, L.; Riera, V.; Miguel, D.; Golen, J. A.; Rheingold, A. L. <i>Inorg. Chem.</i> <b>2007</b> , <i>46</i> , 3407. ((n-C <sub>4</sub> H <sub>9</sub> ) <sub>4</sub> N)[Mn(CO) <sub>3</sub> (NC <sub>7</sub> H <sub>12</sub> N) <sub>3</sub> ]ReO <sub>4</sub> B(3,5-C <sub>6</sub> H <sub>3</sub> (CF <sub>3</sub> ) <sub>2</sub> ) <sub>4</sub>                       |
| KOGFIX   | 1.683 Å | Hernandez, J. G.; Butler, I. S.; Friscic, T. <i>Chem. Sci.</i> <b>2014</b> , <i>5</i> , 3576. [Re(CO) <sub>2</sub> (N <sub>2</sub> C <sub>12</sub> H <sub>8</sub> ) <sub>2</sub> ]ReO <sub>4</sub> ·CH <sub>3</sub> CN                                                                                                                                                                         |
| NUDFEY   | 1.683 Å | Thuery, P. <i>CrystEngComm</i> <b>2009</b> , <i>11</i> , 1150. [U(O) <sub>2</sub> (H <sub>2</sub> O) <sub>2</sub> (NO <sub>3</sub> )(OC <sub>42</sub> H <sub>42</sub> N <sub>29</sub> O <sub>18</sub> )]ReO <sub>4</sub> ·10H <sub>2</sub> O                                                                                                                                                   |
| WONPIY   | 1.684 Å | Thuery, P.; Nierlich, M.; Asfari, Z.; Vicens, J.; Dozol, J.-F. <i>Polyhedron</i> <b>2000</b> , <i>19</i> , 1749. Cs <sub>2</sub> (ReO <sub>4</sub> ) <sub>2</sub> ·C <sub>48</sub> H <sub>60</sub> O <sub>12</sub>                                                                                                                                                                             |
| YENROZ   | 1.684 Å | Machura, B.; Kruszynski, R.; Jaworska, M.; Klak, J.; Mrozinski, J. <i>Polyhedron</i> <b>2006</b> , <i>25</i> , 2537. [ReCl <sub>2</sub> (P(C <sub>6</sub> H <sub>5</sub> ) <sub>3</sub> ) <sub>2</sub> (N <sub>2</sub> C <sub>12</sub> H <sub>8</sub> )]ReO <sub>4</sub> ·0.5H <sub>2</sub> O                                                                                                  |
| 72817    | 1.685 Å | Range, K. J.; Rögner, P.; Heyns, A. M.; Prinsloo, L. C. <i>Z. Naturforsch., Sect. B</i> <b>1992</b> , <i>47</i> , 1513. CsReO <sub>4</sub>                                                                                                                                                                                                                                                     |

|          |         |                                                                                                                                                                                                                                                                                                                                                                                                                             |
|----------|---------|-----------------------------------------------------------------------------------------------------------------------------------------------------------------------------------------------------------------------------------------------------------------------------------------------------------------------------------------------------------------------------------------------------------------------------|
| AROJUM   | 1.685 Å | Xavier, C.; Paulo, A.; Domingos, A.; Santos, I. <i>Eur. J. Inorg. Chem.</i> <b>2004</b> , 243.<br>[ReO(Cl)(C <sub>8</sub> H <sub>19</sub> N <sub>4</sub> )] <sub>3</sub> Cl <sub>2</sub> ReO <sub>4</sub>                                                                                                                                                                                                                   |
| HAGVUH   | 1.685 Å | Farrell, D.; Gloe, K.; Gloe, K.; Goretzki, G.; McKee, V.; Nelson, J.; Nieuwenhuyzen, M.; Pal, I.; Stephan, H.; Town, R. M.; Wichmann, K. <i>Dalton Trans.</i> <b>2003</b> , 1961. (C <sub>36</sub> H <sub>60</sub> N <sub>8</sub> )(ReO <sub>4</sub> ) <sub>6</sub> ·5H <sub>2</sub> O                                                                                                                                      |
| JOCLIW01 | 1.685 Å | Shibaeva, R. P.; Zavodnik, V. E. <i>Kristallografiya</i> <b>1993</b> , 38, 114. (C <sub>10</sub> H <sub>8</sub> N <sub>4</sub> S <sub>4</sub> )ReO <sub>4</sub> ·C <sub>10</sub> H <sub>8</sub> N <sub>4</sub> S <sub>4</sub> ·H <sub>2</sub> O                                                                                                                                                                             |
| PIGLUM   | 1.685 Å | Matsumiya, S.; Izuoka, A.; Sugawara, T.; Taruishi, T.; Kawada, Y.; Tokumoto, M. <i>Bull Chem. Soc. Jpn.</i> <b>1993</b> , 66, 1949. (C <sub>12</sub> H <sub>12</sub> S <sub>8</sub> )ReO <sub>4</sub> ·C <sub>12</sub> H <sub>12</sub> S <sub>8</sub>                                                                                                                                                                       |
| LIBVEX   | 1.686 Å | Sundermeyer, J.; Weber, K.; Peters, K.; von Schnering, H. G. <i>Organometallics</i> <b>1994</b> , 13, 2560.<br>[Re(O) <sub>3</sub> (C(P(C <sub>6</sub> H <sub>5</sub> ) <sub>3</sub> ) <sub>2</sub> )]ReO <sub>4</sub>                                                                                                                                                                                                      |
| QIWIYG   | 1.686 Å | Kokunov, Y. V.; Gorbunova, Y. E.; Kovalev, V. V.; Kozyukhin, S. A. <i>Koord. Khim.</i> <b>2013</b> , 39, 468.<br>[Ag(NC <sub>5</sub> H <sub>7</sub> N <sub>2</sub> ) <sub>2</sub> ] <sub>2</sub> ReO <sub>4</sub>                                                                                                                                                                                                           |
| HIQXEO   | 1.687 Å | Bagchi, S.; Kamilya, S.; Mehta, S.; Mandal, S.; Bandyopadhyay, A.; Narayan, A.; Ghosh, S.; Mondal, A. <i>Dalton Trans.</i> <b>2023</b> , 52, 11335. [MnC <sub>22</sub> H <sub>24</sub> Br <sub>4</sub> N <sub>4</sub> O <sub>2</sub> ] <sub>2</sub> ReO <sub>4</sub> ·H <sub>2</sub> O                                                                                                                                      |
| KIZCII   | 1.687 Å | Li, C.-P.; Ai, J.-Y.; Zhou, H.; Chen, Q.; Yang, Y.; He, H.; Du, M. <i>Chem. Commun.</i> <b>2019</b> , 55, 1841.<br>[Ag <sub>2</sub> C <sub>36</sub> H <sub>28</sub> N <sub>16</sub> ] <sub>n</sub> (ReO <sub>4</sub> ) <sub>2</sub> ·2(CH <sub>3</sub> ) <sub>2</sub> NCHO                                                                                                                                                  |
| LOPTUF   | 1.687 Å | Melian, C.; Kremer, C.; Suescun, L.; Mombru, A. W.; Mariezcurrena, R. A.; Kremer, E. <i>Inorg. Chim. Acta</i> <b>2000</b> , 306, 70. [ReC <sub>9</sub> H <sub>20</sub> N <sub>4</sub> O <sub>3</sub> ] <sub>2</sub> ReO <sub>4</sub>                                                                                                                                                                                        |
| NEQDAS   | 1.687 Å | Sovari, S. N.; Kolly, I.; Schindler, K.; Cortat, Y.; Liu, S.-C.; Crochet, A.; Pavic, A.; Zobi, F. <i>Molecules</i> <b>2021</b> , 26, 5302. (C <sub>11</sub> H <sub>11</sub> N <sub>2</sub> ) <sub>2</sub> ReO <sub>4</sub>                                                                                                                                                                                                  |
| NOMDEY   | 1.687 Å | Cotton, F. A.; Dikarev, E. V.; Petrukhina, M. A. <i>Inorg. Chem.</i> <b>1998</b> , 37, 1949.<br>[Re <sub>2</sub> C <sub>32</sub> H <sub>44</sub> Cl <sub>4</sub> P <sub>4</sub> ] <sub>2</sub> ReO <sub>4</sub> ·CH <sub>2</sub> Cl <sub>2</sub>                                                                                                                                                                            |
| NUFCID   | 1.687 Å | Ghosh, R.; Ghosh, T. K.; Ghosh, P. <i>Dalton Trans.</i> <b>2020</b> , 49, 3039. (C <sub>6</sub> (C <sub>6</sub> H <sub>10</sub> N <sub>2</sub> ) <sub>6</sub> )(ReO <sub>4</sub> ) <sub>6</sub> ·6CH <sub>3</sub> CN                                                                                                                                                                                                        |
| RUWDUK   | 1.687 Å | Gryca, I.; Machura, B.; Malecki, J. G.; Kusz, J.; Shul'pina, L. S.; Ikonnikov, N. S.; Shul'pin, G. B. <i>Dalton Trans.</i> <b>2016</b> , 45, 334. [ReCl(P(C <sub>6</sub> H <sub>5</sub> ) <sub>3</sub> ) <sub>2</sub> (NC <sub>6</sub> H <sub>4</sub> (CH <sub>3</sub> ))(NOC <sub>13</sub> H <sub>8</sub> S)] <sub>2</sub> ReO <sub>4</sub>                                                                                |
| SIWKEP   | 1.687 Å | Szafranski, M.; Katrusiak, A.; McIntyre, G. J. <i>Phys. Rev. Lett.</i> <b>2002</b> , 89, 215507. (C <sub>6</sub> H <sub>13</sub> N <sub>2</sub> ) <sub>2</sub> ReO <sub>4</sub>                                                                                                                                                                                                                                             |
| WONNUI   | 1.687 Å | Thuery, P.; Nierlich, M.; Asfari, Z.; Vicens, J.; Dozol, J.-F. <i>Polyhedron</i> <b>2000</b> , 19, 1749.<br>[Na <sub>2</sub> C <sub>48</sub> H <sub>64</sub> O <sub>14</sub> ](ReO <sub>4</sub> ) <sub>2</sub>                                                                                                                                                                                                              |
| ABEYUD   | 1.688 Å | Ion, L.; Nieto, S.; Perez, J.; Riera, L.; Riera, V.; Diaz, J.; Lopez, R.; Anderson, K. M.; Steed, J. W. <i>Inorg. Chem.</i> <b>2011</b> , 50, 8524. [Re(CO) <sub>2</sub> (NC <sub>4</sub> H <sub>6</sub> N) <sub>2</sub> (2-NC <sub>3</sub> H <sub>4</sub> (NH <sub>2</sub> ))] <sub>2</sub> ReO <sub>4</sub>                                                                                                               |
| HULTUD   | 1.688 Å | Khasanov, S. S.; Perez-Benitez, A.; Narymbetov, B. Z.; Zorina, L. V.; Shibaeva, R. P.; Singleton, J.; Klehe, A.-K.; Laukhin, V. N.; Vidal-Gancedo, J.; Veciana, J.; Canadell, E.; Rovira, C. <i>J. Mater. Chem.</i> <b>2002</b> , 12, 432. (C <sub>10</sub> H <sub>8</sub> S <sub>6</sub> ) <sub>4</sub> (ReO <sub>4</sub> ) <sub>4</sub> ·5C <sub>10</sub> H <sub>8</sub> S <sub>6</sub> ·2C <sub>4</sub> H <sub>8</sub> O |

|        |         |                                                                                                                                                                                                                                                                                                                                                     |
|--------|---------|-----------------------------------------------------------------------------------------------------------------------------------------------------------------------------------------------------------------------------------------------------------------------------------------------------------------------------------------------------|
| IXODOR | 1.688 Å | Li, F.-Z.; Geng, J.-S.; Hu, K.-Q.; Yu, J.-P.; Liu, N.; Chai, Z.-F.; Mei, L.; Shi, W.-Q. <i>Inorg. Chem.</i> <b>2021</b> , <i>60</i> , 10522. (UC <sub>36</sub> H <sub>40</sub> N <sub>4</sub> O <sub>10</sub> ) <sub>n</sub> (ReO <sub>4</sub> ) <sub>2</sub> ·2C <sub>36</sub> H <sub>36</sub> N <sub>24</sub> O <sub>12</sub> ·16H <sub>2</sub> O |
| OHIYIN | 1.688 Å | Selivanova, S. V.; Dolphin, D.; van Lier, J. E.; Kudrevich, S. V. <i>Inorg. Chim. Acta</i> <b>2003</b> , <i>349</i> , 58. [Re <sub>3</sub> C <sub>72</sub> H <sub>60</sub> N <sub>6</sub> O <sub>10</sub> S <sub>6</sub> ] <sub>n</sub> ReO <sub>4</sub> ·2C <sub>2</sub> H <sub>5</sub> OH                                                         |
| BEKXOI | 1.689 Å | Zhou, W.; Li, A.; Gale, P. A.; He, Q. <i>Cell Rep. Phys. Sci.</i> <b>2022</b> , <i>3</i> , 100875. (C <sub>78</sub> H <sub>80</sub> N <sub>12</sub> O <sub>12</sub> )ReO <sub>4</sub> ·5CHCl <sub>3</sub>                                                                                                                                           |
| PAVHID | 1.689 Å | Rosini, G. P.; Jones, W. D. <i>J. Am. Chem. Soc.</i> <b>1993</b> , <i>115</i> , 965. [ReH <sub>2</sub> (P(C <sub>6</sub> H <sub>5</sub> ) <sub>3</sub> ) <sub>2</sub> (C <sub>9</sub> H <sub>10</sub> )]ReO <sub>4</sub>                                                                                                                            |
| REDREX | 1.689 Å | Wittern, U.; Strahle, J.; Abram, U. <i>Z. Anorg. Allg. Chem.</i> <b>1997</b> , <i>623</i> , 218. [ReCl(NC <sub>5</sub> H <sub>5</sub> ) <sub>2</sub> (OSi(CH <sub>3</sub> ) <sub>2</sub> )(NC <sub>6</sub> H <sub>5</sub> )(NHC <sub>6</sub> H <sub>5</sub> )]ReO <sub>4</sub>                                                                      |
| TUWRAF | 1.689 Å | Machura, B.; Wolff, M.; Kusz, J. <i>Polyhedron</i> <b>2010</b> , <i>29</i> , 1619. [Re(O)(P(C <sub>6</sub> H <sub>5</sub> ) <sub>3</sub> )(OC <sub>8</sub> H <sub>7</sub> N <sub>2</sub> ) <sub>2</sub> ] <sub>n</sub> ReO <sub>4</sub> ·CH <sub>3</sub> OH                                                                                         |
| BIJPOA | 1.690 Å | Kuckmann, T. I.; Abram, U. <i>Inorg. Chem.</i> <b>2004</b> , <i>43</i> , 7068. [Re(O) <sub>2</sub> (C <sub>22</sub> H <sub>40</sub> N <sub>4</sub> ) <sub>2</sub> ] <sub>n</sub> ReO <sub>4</sub> ·1.5C <sub>4</sub> H <sub>8</sub> O                                                                                                               |
| MAVRUA | 1.690 Å | Ronson, T. K.; Carpenter, J. P.; Nitschke, J. R. <i>Chem. (Cell Press)</i> <b>2022</b> , <i>8</i> , 557. [Co <sub>6</sub> C <sub>276</sub> H <sub>198</sub> N <sub>48</sub> ](ReO <sub>4</sub> ) <sub>12</sub>                                                                                                                                      |
| LEKGIS | 1.690 Å | Stephan, H.; Gloe, K.; Kraus, W.; Spies, H.; Johannsen, B.; Wichmann, K.; Reck, G.; Chand, D. K.; Bharadwaj, P. K.; Müller, U. Müller, W. M.; Vogtle, F. <i>Fund. Applications Anion Sep.</i> <b>2004</b> , 151. (C <sub>36</sub> H <sub>56</sub> N <sub>8</sub> )(ReO <sub>4</sub> ) <sub>2</sub> ·3H <sub>2</sub> O                               |
| BICKEH | 1.691 Å | Qin, H.; Jiang, J.; Sun, X.; Lin, N.; Yang, P.; Chen, Y. <i>Inorg. Chem.</i> <b>2023</b> , <i>62</i> , 6458. (ZnC <sub>60</sub> H <sub>30</sub> N <sub>30</sub> O <sub>12</sub> ) <sub>n</sub> (ReO <sub>4</sub> ) <sub>2</sub> ·(CH <sub>3</sub> ) <sub>2</sub> NCHO                                                                               |
| RARDAT | 1.691 Å | Hong Z. CCDC deposition number 1961082, <b>2022</b> . [Ir <sub>3</sub> C <sub>72</sub> H <sub>81</sub> ](ReO <sub>4</sub> ) <sub>6</sub>                                                                                                                                                                                                            |
| AROGAQ | 1.692 Å | Braband, H.; Imstepf, S.; Felber, M.; Spingler, B.; Alberto, R. <i>Inorg. Chem.</i> <b>2010</b> , <i>49</i> , 1283. [ReO <sub>3</sub> (C <sub>24</sub> H <sub>27</sub> N <sub>3</sub> ) <sub>3</sub> ](ReO <sub>4</sub> ) <sub>3</sub> ·4C <sub>4</sub> H <sub>8</sub> O                                                                            |
| PITZAV | 1.693 Å | Nishijo, J.; Enomoto, M. <i>Inorg. Chem.</i> <b>2013</b> , <i>52</i> , 13263. [CrC <sub>32</sub> H <sub>38</sub> N <sub>4</sub> S <sub>12</sub> ](ReO <sub>4</sub> ) <sub>2</sub> ·3C <sub>6</sub> H <sub>5</sub> Br                                                                                                                                |
| TUJRUL | 1.693 Å | Sugimoto, H.; Kamei, M.; Umakoshi, K.; Sasaki, Y.; Suzuki, M. <i>Inorg. Chem.</i> <b>1996</b> , <i>35</i> , 7082. [Re <sub>2</sub> C <sub>40</sub> H <sub>44</sub> N <sub>8</sub> O <sub>2</sub> ](ReO <sub>4</sub> ) <sub>4</sub>                                                                                                                  |
| VAJLAU | 1.693 Å | Ray, U.; Chand, B.; Dasmahapatra, A. K.; Mostafa, G.; Lu, T.-H.; Sinha, C. <i>Inorg. Chem. Commun.</i> <b>2003</b> , <i>6</i> , 634. (C <sub>12</sub> H <sub>15</sub> N <sub>4</sub> )ReO <sub>4</sub>                                                                                                                                              |
| AHIRUF | 1.694 Å | Thuery, P. <i>Inorg. Chem.</i> <b>2009</b> , <i>48</i> , 4497. [Yb(H <sub>2</sub> O) <sub>8</sub> ](ReO <sub>4</sub> ) <sub>3</sub> ·(C <sub>36</sub> H <sub>36</sub> N <sub>24</sub> O <sub>12</sub> )·6H <sub>2</sub> O                                                                                                                           |
| AYAKAP | 1.695 Å | Wang, X.; Ding, S.; Wang, Z.; Song, L.; Yang, X.; Xiao, Q.; Xu, H.; Wang, J.; Shen, Z.; Wang, H. <i>Inorg. Chem.</i> <b>2021</b> , <i>60</i> , 10889. (C <sub>18</sub> H <sub>37</sub> N <sub>4</sub> O <sub>3</sub> )ReO <sub>4</sub> ·0.5H <sub>2</sub> O                                                                                         |
| KOCVII | 1.695 Å | Booyesen, I.; Gerber, T. I. A.; Mayer, P. <i>Inorg. Chem. Commun.</i> <b>2008</b> , <i>11</i> , 461. [ReBr(NO)(P(C <sub>6</sub> H <sub>5</sub> ) <sub>3</sub> ) <sub>2</sub> (OC <sub>24</sub> H <sub>19</sub> N)]ReO <sub>4</sub>                                                                                                                  |
| ZAVZUR | 1.695 Å | Holman, K. T.; Halihan, M. M.; Steed, J. W.; Jurisson, S. S.; Atwood, J. L. <i>J. Am. Chem. Soc.</i> <b>1995</b> , <i>117</i> , 7848. [Ru <sub>2</sub> C <sub>47</sub> H <sub>58</sub> O <sub>6</sub> ](ReO <sub>4</sub> ) <sub>3</sub> CF <sub>3</sub> SO <sub>3</sub> ·CH <sub>3</sub> NO <sub>2</sub>                                            |

|          |         |                                                                                                                                                                                                                                                                                                                                                                        |
|----------|---------|------------------------------------------------------------------------------------------------------------------------------------------------------------------------------------------------------------------------------------------------------------------------------------------------------------------------------------------------------------------------|
| ONUZZI   | 1.696 Å | Gomez, J. D. C.; Balcazar, E.; Hagenbach, A.; Noufele, C. N.; Abram, U. <i>Polyhedron</i> <b>2016</b> , <i>117</i> , 293. [Re(O) <sub>2</sub> (P(C <sub>6</sub> H <sub>5</sub> ) <sub>3</sub> ) <sub>2</sub> (NC <sub>9</sub> H <sub>10</sub> NOS) <sub>2</sub> ]ReO <sub>4</sub>                                                                                      |
| AHIQAK   | 1.696 Å | Thuery, P. <i>Inorg. Chem.</i> <b>2009</b> , <i>48</i> , 4497. [SmKC <sub>30</sub> H <sub>38</sub> N <sub>21</sub> O <sub>17</sub> ] <sub>n</sub> (ReO <sub>4</sub> ) <sub>3</sub> ·3H <sub>2</sub> O                                                                                                                                                                  |
| WONPAQ   | 1.696 Å | Thuery, P.; Nierlich, M.; Asfari, Z.; Vicens, J.; Dozol, J.-F. <i>Polyhedron</i> <b>2000</b> , <i>19</i> , 1749. [Cs <sub>2</sub> ReO <sub>4</sub> [ReO <sub>4</sub> (H <sub>2</sub> O) <sub>2</sub> ] <sub>2</sub> ·C <sub>48</sub> H <sub>60</sub> O <sub>12</sub> ]                                                                                                 |
| OBONIE   | 1.697 Å | Landman, M.; van der Westhuizen, B.; Bezuidenhout, D. I.; Liles, D. C. <i>Acta Crystallogr., Sect E</i> <b>2011</b> , <i>67</i> , m1897. (C <sub>21</sub> H <sub>25</sub> N <sub>2</sub> )ReO <sub>4</sub>                                                                                                                                                             |
| EBIJEE   | 1.697 Å | Smith, K. J.; Ondracek, A. L.; Gruhn, N. E.; Lichtenberger, D. L.; Fanwick, P. E.; Walton, R. A. <i>Inorg. Chim. Acta</i> <b>2000</b> , <i>300</i> , 23. ((C(P(CH <sub>3</sub> ) <sub>3</sub> )(CH <sub>3</sub> ) <sub>2</sub> ((CH <sub>2</sub> COCH <sub>3</sub> )))ReO <sub>4</sub>                                                                                 |
| WUQSIK   | 1.697 Å | Gibson, D. H.; Yin, X.; He, H.; Mashuta, M. S. <i>Organometallics</i> <b>2003</b> , <i>22</i> , 337. [CO <sub>3</sub> (Re(CO <sub>3</sub> )(N <sub>2</sub> C <sub>12</sub> H <sub>12</sub> )) <sub>3</sub> ]ReO <sub>4</sub> ·0.75CH <sub>2</sub> Cl <sub>2</sub> ·0.5O(C <sub>2</sub> H <sub>5</sub> ) <sub>2</sub>                                                   |
| JUYBIO   | 1.698 Å | Tang, B. W.; Reibenspies, J.; Martell, A. E. <i>Inorg. Chem.</i> <b>1993</b> , <i>32</i> , 988. [Re(O)OH(N <sub>4</sub> C <sub>10</sub> H <sub>22</sub> O)]ReO <sub>4</sub>                                                                                                                                                                                            |
| XIHLIK   | 1.698 Å | Ota, A.; Yamochi, H.; Saito, G. <i>J. Low Temp. Phys.</i> <b>2006</b> , <i>142</i> , 429. (C <sub>8</sub> H <sub>6</sub> O <sub>2</sub> S <sub>4</sub> )ReO <sub>4</sub> ·C <sub>8</sub> H <sub>6</sub> O <sub>2</sub> S <sub>4</sub>                                                                                                                                  |
| XUDMIS02 | 1.698 Å | Czarnecki, P.; Maluszynska, H. <i>J. Phys.: Condensed Matter</i> <b>2000</b> , <i>12</i> , 4881. [C <sub>5</sub> H <sub>6</sub> N]ReO <sub>4</sub>                                                                                                                                                                                                                     |
| AMOHAL   | 1.699 Å | Leibnitz, P.; Reck, G.; Pietzsch, H.-J.; Spies, H. <i>Forschungszent Rossendorf</i> <b>2001</b> , <i>211</i> , 36. (C <sub>19</sub> H <sub>30</sub> N <sub>3</sub> )ReO <sub>4</sub>                                                                                                                                                                                   |
| ASINAR   | 1.699 Å | Gerber, T. I. A.; Tshentu, Z. R.; Mayer, P. <i>J. Coord. Chem.</i> <b>2003</b> , <i>56</i> , 1357. [ReC <sub>27</sub> H <sub>32</sub> ClN <sub>3</sub> O <sub>2</sub> P]ReO <sub>4</sub>                                                                                                                                                                               |
| DEQLEQ   | 1.699 Å | Heuze, K.; Fourmigue, D. M.; Batail, P.; Canadell, E.; Auban-Senzier, P. <i>Chem. – Eur. J.</i> <b>1999</b> , <i>5</i> , 2971. (C <sub>9</sub> H <sub>7</sub> NOS <sub>6</sub> )ReO <sub>4</sub> ·C <sub>9</sub> H <sub>7</sub> NOS <sub>6</sub>                                                                                                                       |
| ECAFAS   | 1.699 Å | Kaabel, S.; Adamson, J.; Topic, F.; Kiesila, A.; Kalenius, E.; Oeren, M.; Reimund, M.; Prigorchenko, E.; Lookene, A.; Reich, H. J.; Rissanen, K.; Aav, R. <i>Chem. Sci.</i> <b>2017</b> , <i>8</i> , 2184. ((n-C <sub>4</sub> H <sub>9</sub> ) <sub>4</sub> N)ReO <sub>4</sub> ·C <sub>64</sub> H <sub>96</sub> N <sub>16</sub> O <sub>8</sub> ·1.75CH <sub>3</sub> OH |
| GAGMEI   | 1.699 Å | Korenev, S. V.; Vasil'chenko, D. B.; Baidina, I. A.; Filatov, E. Y.; Venediktov, A. B. <i>Russ. Chem. Bull.</i> <b>2008</b> , 1607. [RhCl <sub>2</sub> (NC <sub>5</sub> H <sub>4</sub> CH <sub>3</sub> ) <sub>4</sub> ]                                                                                                                                                |
| MUQNIV   | 1.699 Å | Ray, U. S.; Mostafa, G.; Lu, T. H.; Sinha, C. <i>Crystal Eng.</i> <b>2002</b> , <i>5</i> , 95. (C <sub>16</sub> H <sub>15</sub> N <sub>4</sub> )ReO <sub>4</sub> ·H <sub>2</sub> O                                                                                                                                                                                     |
| RESDEY   | 1.699 Å | Miller, J. R. Lu, C.; Zheng, Y. <i>Acta Crystallogr., Sect. C</i> <b>1997</b> , <i>53</i> , 1039. (C <sub>42</sub> H <sub>34</sub> PSSi)ReO <sub>4</sub> ·CH <sub>2</sub> Cl <sub>2</sub>                                                                                                                                                                              |
| WEDCAK   | 1.699 Å | Gerber, T. I. A.; Hosten, E.; Mayer, P.; Tshentu, Z. R. <i>J. Coord. Chem.</i> <b>2006</b> , <i>59</i> , 243. [ReCl <sub>2</sub> (P(C <sub>6</sub> H <sub>5</sub> ) <sub>3</sub> ) <sub>2</sub> (N <sub>2</sub> C <sub>8</sub> H <sub>7</sub> N)]ReO <sub>4</sub> ·0.5CH <sub>3</sub> OH                                                                               |
| YAXBUI   | 1.699 Å | Christie, S. D.; Clerk, M. D.; Zaworotko, M. J. <i>J. Crystallogr. Spectrosc. Res.</i> <b>1993</b> , <i>23</i> , 591. [Re(CO) <sub>3</sub> (ON(CH <sub>3</sub> ) <sub>3</sub> ) <sub>3</sub> ]ReO <sub>4</sub>                                                                                                                                                         |
| 160303   | 1.700 Å | Shubin, Y. V.; Filatov, E. Y.; Baidina, I. A.; Yusenko, K. V.; Zadesenetz, A. V.; Korenev, S. V. <i>Russ. J. Struct. Chem.</i> <b>2006</b> , <i>47</i> , 1115. [Rh(NH <sub>3</sub> ) <sub>5</sub> Cl](ReO <sub>4</sub> ) <sub>2</sub>                                                                                                                                  |

|          |         |                                                                                                                                                                                                                                                                                        |
|----------|---------|----------------------------------------------------------------------------------------------------------------------------------------------------------------------------------------------------------------------------------------------------------------------------------------|
| 421687   | 1.700 Å | Baidina, I. A.; Filatov, E. Y.; Makotchenko, E. V.; Smolentsev, A. I. <i>J. Struct. Chem.</i> <b>2012</b> , <i>53</i> , 112. [Co(NH <sub>3</sub> ) <sub>5</sub> Cl](ReO <sub>4</sub> ) <sub>3</sub> ·0.25H <sub>2</sub> O                                                              |
| AVUPUF   | 1.700 Å | Li, Y.; Huang, C.-R.; Du, Y.; Peng, H.; Zeng, Y.-L.; Liu, J.-C.; Xie, Y.; Xiong, R.-G. <i>Angew. Chem, Int. Ed.</i> <b>2021</b> , <i>60</i> , 16668. (C <sub>9</sub> H <sub>20</sub> N <sub>2</sub> O)ReO <sub>4</sub> ·C <sub>12</sub> H <sub>24</sub> O <sub>6</sub>                 |
| BEZTAF   | 1.700 Å | Daolio, A.; Pizzi, A.; Calabrese, M.; Demitri, N.; Murray, J. S.; Politzer, P.; Resnati, G. <i>Cryst. Growth Des.</i> <b>2023</b> , <i>23</i> , 574. (C <sub>4</sub> H <sub>7</sub> N <sub>2</sub> )ReO <sub>4</sub>                                                                   |
| RARCUM   | 1.700 Å | Hong Z. CCDC deposition number 1959195, <b>2022</b> . [Ir <sub>3</sub> C <sub>72</sub> H <sub>81</sub> ]CF <sub>3</sub> SO <sub>3</sub> (ReO <sub>4</sub> ) <sub>5</sub>                                                                                                               |
| FASXUT   | 1.700 Å | Tamm, M.; Beer, S.; Herdtweck, E. <i>Z. Naturforsch., Sect. B</i> <b>2004</b> , <i>59</i> , 1497. (C <sub>11</sub> H <sub>22</sub> N <sub>3</sub> )ReO <sub>4</sub>                                                                                                                    |
| MICVIE   | 1.700 Å | Nieto, S.; Perez, J.; Riera, L.; Riera, V.; Miguel, D.; Golen, J. A.; Rheingold, A. L. <i>Inorg. Chem.</i> <b>2007</b> , <i>46</i> , 3407. [Mn(CO) <sub>3</sub> (NC <sub>5</sub> H <sub>8</sub> N) <sub>3</sub> ](ReO <sub>4</sub> ) <sub>2</sub>                                      |
| ONUTEZ   | 1.700 Å | Li, C.-P.; Zhou, H.; Chen, J.; Wang, J.-J.; Du, M.; Zhou, W. <i>ACS Appl. Mater. Interfaces</i> <b>2020</b> , <i>12</i> , 15246. [Ag <sub>2</sub> C <sub>52</sub> H <sub>36</sub> N <sub>8</sub> ](ReO <sub>4</sub> ) <sub>2</sub>                                                     |
| XUDMIS07 | 1.700 Å | Maluszynska, H.; Cousson, A.; Czarnecki, P. <i>J. Phys.: Condensed Matter</i> <b>2010</b> , <i>22</i> , 235901. [C <sub>5</sub> H <sub>6</sub> N]ReO <sub>4</sub>                                                                                                                      |
| NEZHAB   | 1.701 Å | Belanger, S.; Fortin, S.; Beauchamp, A. L. <i>Can. J. Chem.</i> <b>1997</b> , <i>75</i> , 37. [Re(O) <sub>2</sub> (NC <sub>7</sub> H <sub>6</sub> N) <sub>4</sub> ][Re(O)OH(NC <sub>7</sub> H <sub>6</sub> N) <sub>4</sub> ](ReO <sub>4</sub> ) <sub>3</sub>                           |
| PAKGUD   | 1.701 Å | Costello, M. T.; Fanwick, P. E.; Green, M. A.; Walton, R. A. <i>Inorg. Chem.</i> <b>1992</b> , <i>31</i> , 2359. [ReC <sub>82</sub> H <sub>82</sub> P <sub>6</sub> ]ReO <sub>4</sub> ·5C <sub>6</sub> H <sub>6</sub>                                                                   |
| PIGBAI   | 1.701 Å | Wang, Y.-P.; Che, C.-M.; Wong, K.-Y.; Peng, S.-M. <i>Inorg. Chem.</i> <b>1993</b> , <i>32</i> , 5827. [Re(O) <sub>2</sub> (N <sub>4</sub> C <sub>10</sub> H <sub>24</sub> )]ReO <sub>4</sub> ·0.5H <sub>2</sub> O                                                                      |
| VECKOF   | 1.701 Å | Amendola, V.; Alberti, G.; Bergamaschi, G.; Biesuz, R.; Boiocchi, M.; Ferrito, S.; Schmidtchen, F.-P. <i>Eur. J. Inorg. Chem.</i> <b>2012</b> , 3410. (C <sub>36</sub> H <sub>60</sub> N <sub>8</sub> )(ReO <sub>4</sub> ) <sub>5</sub> Cl·6H <sub>2</sub> O                           |
| VUYPOV   | 1.701 Å | Al Othman, Z. A.; Akriche, S. T.; Rzaigui, M.; Mahfouz, R. M. <i>Acta Crystallogr., Sect. E</i> <b>2010</b> , <i>66</i> , m689. (C <sub>5</sub> H <sub>6</sub> N <sub>3</sub> O <sub>2</sub> )ReO <sub>4</sub>                                                                         |
| XOLXOO   | 1.701 Å | Harada, J.; Kawamura, Y.; Takahashi, Y.; Uemura, Y.; Hasegawa, T.; Taniguchi, H.; Maruyama, K. <i>J. Am. Chem. Soc.</i> <b>2019</b> , <i>141</i> , 9349. (C <sub>6</sub> H <sub>12</sub> N)ReO <sub>4</sub>                                                                            |
| NENJAV   | 1.702 Å | Ye, X.; He, W.; Wei, J.; Wei, Z.; You, X.; Cai, H. <i>Dalton Trans.</i> <b>2022</b> , <i>51</i> , 15074. (C <sub>6</sub> H <sub>3</sub> F <sub>2</sub> (CH <sub>2</sub> NH <sub>3</sub> ))ReO <sub>4</sub> ·C <sub>10</sub> H <sub>20</sub> O <sub>5</sub>                             |
| DEGFAW03 | 1.702 Å | Kanbara, H.; Tajima, H.; Aratani, A.; Yakushi, K.; Kuroda, H.; Saito, G.; Kawamoto, A.; Tanaka, J. <i>Chem. Lett.</i> <b>1986</b> , 437. (C <sub>10</sub> H <sub>8</sub> S <sub>8</sub> ) <sub>2</sub> (ReO <sub>4</sub> ) <sub>2</sub> ·C <sub>10</sub> H <sub>8</sub> S <sub>8</sub> |
| HUWBOR   | 1.702 Å | Lin, H.; Wu, X.; Maggard, P. A. <i>Inorg. Chem.</i> <b>2009</b> , <i>48</i> , 11265. [Ag <sub>2</sub> C <sub>56</sub> H <sub>40</sub> N <sub>16</sub> ](ReO <sub>4</sub> ) <sub>2</sub>                                                                                                |
| KUCCUI   | 1.702 Å | Reich, R. M.; Cokoja, M.; Markovits, I. I. E.; Munchmeyer, C. J.; Kaposi, M.; Pothig, A.; Herrmann, W. A.; Kuhn, F. E. <i>Dalton Trans.</i> <b>2015</b> , <i>44</i> , 8669. (C <sub>14</sub> H <sub>14</sub> F <sub>5</sub> N <sub>2</sub> )ReO <sub>4</sub>                           |



|        |         |                                                                                                                                                                                                                                                                                                             |
|--------|---------|-------------------------------------------------------------------------------------------------------------------------------------------------------------------------------------------------------------------------------------------------------------------------------------------------------------|
| MICVUQ | 1.702 Å | Nieto, S.; Perez, J.; Riera, L.; Riera, V.; Miguel, D.; Golen, J. A.; Rheingold, A. L. <i>Inorg. Chem.</i> <b>2007</b> , <i>46</i> , 3407. $[\text{Mn}(\text{CO})_3(\text{NC}_5\text{H}_8\text{N})_3](\text{ReO}_4)_2$                                                                                      |
| PEPDAP | 1.702 Å | Englert, U.; Koelle, U.; Nageswara, R. N. <i>Z. Kristallogr. – New. Struct.</i> <b>1993</b> , <i>206</i> , 106. $(\text{C}_{10}\text{H}_9\text{N}_2\text{O})\text{ReO}_4$                                                                                                                                   |
| PIHYOV | 1.702 Å | Booyesen, I.; Gerber, T. I. A.; Mayer, P.; Schalekamp, H. J. <i>J. Coord. Chem.</i> <b>2007</b> , <i>60</i> , 1755. $[\text{ReI}(\text{P}(\text{C}_6\text{H}_5)_3)_2(\text{N}_2\text{C}_6\text{H}_9\text{N}_2\text{O}_2)(\text{NC}_6\text{H}_8\text{N}_2\text{O}_2)]\text{ReO}_4 \cdot 2\text{H}_2\text{O}$ |
| REDJAP | 1.702 Å | Gritsenko, V. V.; Dyachenko, O. A.; Kotov, A. I.; Buravov, L. I.; Mizuno, M. <i>Russ. J. Coord. Chem.</i> <b>2001</b> , <i>27</i> , 432. $(\text{C}_{12}\text{H}_{10}\text{O}_2\text{S}_8)\text{ReO}_4 \cdot \text{C}_{12}\text{H}_{10}\text{O}_2\text{S}_8$                                                |
| RIWDIK | 1.702 Å | Velikova, V.; Petrova, R.; Angelova, O. <i>Acta Crystallogr., Sect. C</i> <b>1997</b> , <i>53</i> , 1230. $(\text{C}_6\text{H}_8\text{N}_3\text{O})\text{ReO}_4$                                                                                                                                            |
| RUWMUT | 1.702 Å | Wood, C. S.; Ronson, T. K.; McConnell, A. J.; Roberts, D. A.; Nitschke, J. R. <i>Chem. Sci.</i> <b>2016</b> , <i>7</i> , 1702. $[\text{Zn}_9\text{C}_{180}\text{H}_{146}\text{N}_{30}\text{O}_{16}](\text{ReO}_4)_4(\text{N}(\text{SO}_2\text{CF}_3)_2)_8 \cdot \text{CH}_3\text{CN}$                       |
| UVEFUX | 1.702 Å | Nishiwaki, M.; Nakamura, K.; Shirahata, T.; Misaki, Y. <i>Chem. Lett.</i> <b>2011</b> , <i>40</i> , 452. $(\text{C}_{13}\text{H}_8\text{S}_8)\text{ReO}_4 \cdot 2(\text{C}_{13}\text{H}_8\text{S}_8) \cdot \text{C}_6\text{H}_5\text{Cl}$                                                                   |
| VILJEF | 1.702 Å | Predota, M.; Petricek, V.; Zak, Z.; Glowiak, T.; Novotny, J. <i>Acta Crystallogr., Sect. E</i> <b>1991</b> , <i>47</i> , 738. $(\text{C}_{19}\text{H}_{15}\text{N}_4)\text{ReO}_4$                                                                                                                          |
| VUPRIK | 1.702 Å | Wang, X.; Hu, X.; Song, L.; Yang, X.; Xiao, Q.; Xu, H.; Ding, S. <i>J. Mol. Struct.</i> <b>2020</b> , <i>1216</i> , 128330. $(\text{C}_{44}\text{H}_{58}\text{N}_8\text{O}_4)(\text{ReO}_4)_2$                                                                                                              |
| WANJOK | 1.702 Å | Mhanni, A.; Ouahab, L.; Grandjean, D.; Amouroux, J.; Fabre, J. M. <i>Acta Crystallogr., Sect. E</i> <b>1993</b> , <i>49</i> , 1187. $(\text{C}_8\text{H}_8\text{S}_4)\text{ReO}_4$                                                                                                                          |
| YALFEZ | 1.702 Å | Huimin, S.; Chen, H.; Zhiming, H.; Yajie, Z.; Tianchi, W.; Chongmin, Z. <i>Chin. J. Org. Chem.</i> <b>2015</b> , <i>35</i> , 1904. $(\text{C}_{27}\text{H}_{39}\text{N}_2)\text{ReO}_4 \cdot 0.5\text{H}_2\text{O}$                                                                                         |
| 142692 | 1.703 Å | Conrad, M.; Russ, P. L.; Schleid, T. <i>Z. Anorg. Allg. Chem.</i> <b>2020</b> , <i>646</i> , 1872. $\text{Sr}(\text{ReO}_4)_2$                                                                                                                                                                              |
| AFEVUE | 1.703 Å | Maruk, A. Y.; Grogorev, M. S.; German, K. E. <i>Koord. Khim.</i> <b>2013</b> , <i>39</i> , 264. $(\text{C}(\text{NHC}_6\text{H}_5)_3)\text{ReO}_4 \cdot 0.5\text{H}_2\text{O}$                                                                                                                              |
| EJALIL | 1.703 Å | Mayer, P.; Hosten, E.; Potgieter, K. C.; Gerber, T. I. A. <i>J. Chem. Cryst.</i> <b>2010</b> , <i>40</i> , 1146. $[\text{ReC}_{40}\text{H}_{39}\text{Br}_2\text{N}_6\text{O}_2\text{P}]\text{ReO}_4$                                                                                                        |
| KUWFEO | 1.703 Å | Nakano, Y.; Takahashi, M.; Sakata, M.; Yamochi, H.; Saito, G.; Tanaka, K. <i>Synth. Met.</i> <b>2009</b> , <i>159</i> , 2381. $(\text{C}_{10}\text{H}_8\text{S}_5)\text{ReO}_4$                                                                                                                             |
| MOWZED | 1.703 Å | Lang, H.-F.; Fanwick, P. E.; Walton, R. A. <i>Inorg. Chim. Acta</i> <b>2002</b> , <i>329</i> , 1. $(\text{C}_{38}\text{H}_{58}\text{N}_2\text{P}_2)\text{ClReO}_4 \cdot \text{CH}_2\text{Cl}_2$                                                                                                             |
| QICSIF | 1.703 Å | Middleditch, M.; Anderson, J. C.; Blake, A. J.; Wilson, C. <i>Inorg. Chem.</i> <b>2007</b> , <i>46</i> , 2797. $[\text{ReC}_{24}\text{H}_{20}\text{N}_6\text{O}_4]\text{ReO}_4 \cdot \text{CH}_2\text{Cl}_2 \cdot 0.25\text{CH}_3\text{OH}$                                                                 |
| ZUJBEN | 1.703 Å | Thuery, P. <i>Eur. J. Inorg. Chem.</i> <b>2015</b> , 2037. $[\text{Th}(\text{H}_2\text{O})_8(\text{NO}_3)](\text{ReO}_4)_3 \cdot \text{C}_{36}\text{H}_{36}\text{N}_{24}\text{O}_{12} \cdot 3\text{H}_2\text{O}$                                                                                            |
| ASIMUK | 1.704 Å | Gerber, T. I. A.; Tshentu, Z. R.; Mayer, P. <i>J. Coord. Chem.</i> <b>2003</b> , <i>56</i> , 1357. $[\text{ReC}_{27}\text{H}_{32}\text{ClN}_2\text{O}_2\text{PS}]\text{ReO}_4$                                                                                                                              |



|          |         |                                                                                                                                                                                                                                                                                    |
|----------|---------|------------------------------------------------------------------------------------------------------------------------------------------------------------------------------------------------------------------------------------------------------------------------------------|
| BAMYEU   | 1.704 Å | Chakraborty, I.; Sengupta, S.; Das, S.; Banerjee, A.; Chakravorty, A. <i>Dalton Trans.</i> <b>2003</b> , 134. [Re(N <sub>2</sub> C <sub>11</sub> H <sub>9</sub> N) <sub>3</sub> ]ReO <sub>4</sub>                                                                                  |
| BAMYEU01 | 1.704 Å | Marsch, R. E. <i>Acta Crystallogr., Sect. B</i> <b>2004</b> , <i>60</i> , 252. [Re(N <sub>2</sub> C <sub>11</sub> H <sub>9</sub> N) <sub>3</sub> ]ReO <sub>4</sub>                                                                                                                 |
| CINBIK02 | 1.704 Å | Williams, J. M.; Beno, M. A.; Wang, H.-H.; Reed, P. E.; Azevedo, L. J.; Schirber, J. E. <i>Inorg. Chem.</i> <b>1984</b> , <i>23</i> , 1790. (C <sub>10</sub> H <sub>8</sub> S <sub>8</sub> )ReO <sub>4</sub> ·C <sub>10</sub> H <sub>8</sub> S <sub>8</sub>                        |
| HOWKOW   | 1.704 Å | Rojas-Dotti, C.; Moliner, N.; Lloret, F.; Martinez-Lillo, J. <i>Crystals</i> <b>2019</b> , <i>9</i> , 23. [Mn <sub>6</sub> C <sub>76</sub> H <sub>78</sub> N <sub>18</sub> O <sub>16</sub> ](ReO <sub>4</sub> ) <sub>2</sub> ·4C <sub>2</sub> H <sub>5</sub> OH                    |
| OBEGOU01 | 1.704 Å | Jankowski, D.; Swietlik, R.; Jeannin, O.; Assaf, A.; Reinheimer, E. W.; Fourmigue, M. J. <i>Raman Spectrosc.</i> <b>2013</b> , <i>44</i> , 1765. (C <sub>11</sub> H <sub>12</sub> S <sub>4</sub> )ReO <sub>4</sub> ·C <sub>11</sub> H <sub>12</sub> S <sub>4</sub>                 |
| UHABUB   | 1.704 Å | Potgieter, K.; Mayer, P.; Gerber, T. I. A.; Booysen, I. N. <i>Polyhedron</i> <b>2009</b> , <i>28</i> , 2808. [Re(P(C <sub>6</sub> H <sub>5</sub> ) <sub>3</sub> ) <sub>2</sub> (C <sub>19</sub> H <sub>13</sub> N <sub>3</sub> O <sub>2</sub> )]ReO <sub>4</sub>                   |
| XEMWET01 | 1.704 Å | Bykova, E. A.; Khranenko, S. P.; Gromilov, S. A. <i>Russ. J. Struct. Chem.</i> <b>2012</b> , <i>53</i> , 186. [Ni(H <sub>2</sub> N(CH <sub>2</sub> ) <sub>2</sub> NH <sub>2</sub> ) <sub>3</sub> ](ReO <sub>4</sub> ) <sub>2</sub>                                                 |
| GUVJIQ   | 1.705 Å | Cowley, A. R.; Dilworth, J. R.; Donnelly, P. S.; Woollard-Shore, J. <i>Dalton Trans.</i> <b>2003</b> , 748. [ReCl <sub>2</sub> (P(C <sub>6</sub> H <sub>5</sub> ) <sub>3</sub> ) <sub>2</sub> (C <sub>7</sub> H <sub>8</sub> N <sub>2</sub> )]ReO <sub>4</sub> ·CH <sub>3</sub> OH |
| HIQXIS   | 1.705 Å | Bagchi, S.; Kamilya, S.; Mehta, S.; Mandal, S.; Bandyopadhyay, A.; Narayan, A.; Ghosh, S.; Mondal, A. <i>Dalton Trans.</i> <b>2023</b> , <i>52</i> , 11335. [MnC <sub>22</sub> H <sub>24</sub> Cl <sub>4</sub> N <sub>4</sub> O <sub>2</sub> ]ReO <sub>4</sub> ·H <sub>2</sub> O   |
| HOBSUN   | 1.705 Å | Fedosseev, A. M.; Grigoriev, M. S.; Charushnikova, I. A.; Budantseva, N. A.; Starikova, Z. A.; Moisy, P. <i>Polyhedron</i> <b>2008</b> , <i>27</i> , 2007. [Nd(O <sub>2</sub> C <sub>11</sub> H <sub>22</sub> N <sub>2</sub> ) <sub>4</sub> ](ReO <sub>4</sub> ) <sub>3</sub>      |
| AHIQOY   | 1.705 Å | Thuery, P. <i>Inorg. Chem.</i> <b>2009</b> , <i>48</i> , 4497. [Yb <sub>2</sub> C <sub>60</sub> H <sub>76</sub> N <sub>40</sub> O <sub>28</sub> ] <sub>n</sub> (ReO <sub>4</sub> ) <sub>6</sub> ·2H <sub>2</sub> O                                                                 |
| NAFCAB   | 1.705 Å | Rodrigues, V. H.; Costa, E. M. M. R.; Gomes, E. M.; Isakov, D.; Belsley, M. S. <i>Central Eur. J. Chem.</i> <b>2014</b> , <i>12</i> , 1016. (CH <sub>3</sub> CH(NH <sub>3</sub> )COOH)ReO <sub>4</sub>                                                                             |
| NIKHAQ   | 1.705 Å | Smith, C. J.; Katti, K. V.; Volkert, W. A.; Barbour, L. J. <i>Inorg. Chem.</i> <b>1997</b> , <i>36</i> , 3928. [Re <sub>2</sub> C <sub>24</sub> H <sub>56</sub> O <sub>12</sub> P <sub>4</sub> S <sub>4</sub> ](ReO) <sub>2</sub>                                                  |
| NOMCEX   | 1.705 Å | Botha, J. M.; Umakoshi, K.; Sasaki, Y.; Lamprecht, G. J. <i>Inorg. Chem.</i> <b>1998</b> , <i>37</i> , 1609. [Re(O)(O(CH <sub>2</sub> ) <sub>2</sub> O)(N <sub>2</sub> C <sub>14</sub> H <sub>17</sub> NO)]ReO <sub>4</sub>                                                        |
| VUQRIL   | 1.705 Å | Wang, X.-N.; Zhao, Y.-M.; Kirchon, A.; Li, B.; Zhou, H.-C. <i>Inorg. Chem.</i> <b>2020</b> , <i>59</i> , 11940. [Zr <sub>6</sub> C <sub>84</sub> H <sub>68</sub> N <sub>8</sub> O <sub>32</sub> ](ReO <sub>4</sub> ) <sub>4</sub>                                                  |
| 402669   | 1.706 Å | Mujica, C.; Peters, K.; Peters, E. M.; von Schnering, H. G. <i>Z. Kristallogr. – New Struct.</i> <b>1997</b> , <i>212</i> , 294. [Cu(H <sub>2</sub> O) <sub>4</sub> ](ReO <sub>4</sub> ) <sub>2</sub>                                                                              |
| AMOGOY   | 1.706 Å | Leibnitz, P.; Reck, G.; Pietzsch, H.-J.; Spies, H. <i>Forschungszent Rossendorf</i> <b>2001</b> , <i>211</i> , 36. (C <sub>7</sub> H <sub>14</sub> N <sub>3</sub> )ReO <sub>4</sub>                                                                                                |
| DIBNAE   | 1.706 Å | Lozan, V.; Kersting, B. <i>Eur. J. Inorg. Chem.</i> <b>2007</b> , 1436. [ReNi <sub>2</sub> C <sub>38</sub> H <sub>64</sub> N <sub>6</sub> O <sub>4</sub> S <sub>2</sub> ]ReO <sub>4</sub> ·H <sub>2</sub> O                                                                        |

|          |         |                                                                                                                                                                                                                                                                                                                                                                                                              |
|----------|---------|--------------------------------------------------------------------------------------------------------------------------------------------------------------------------------------------------------------------------------------------------------------------------------------------------------------------------------------------------------------------------------------------------------------|
| DUBXOO   | 1.706 Å | Rodrigues, V. H.; Costa, M. M. R. R.; Dekola, T.; d.Matos Gomes, E. <i>Acta Crystallogr., Sect. E</i> <b>2009</b> , <i>65</i> , m1000. (C <sub>5</sub> H <sub>6</sub> N <sub>3</sub> O <sub>2</sub> )ReO <sub>4</sub> ·H <sub>2</sub> O                                                                                                                                                                      |
| EJEFOR   | 1.706 Å | Tang, Y.-Y.; Xie, Y.; Ai, Y.; Liao, W.-Q.; Li, P.-F.; Nakamura, T.; Xiong, R.-G. <i>J. Am. Chem. Soc.</i> <b>2020</b> , <i>142</i> , 21932. (C <sub>7</sub> H <sub>11</sub> FNO)ReO <sub>4</sub>                                                                                                                                                                                                             |
| EVOFOM02 | 1.706 Å | Gansle, K. M.; Gash, A. E.; Chambliss, C. K.; Clapsaddle, B. J.; Newell, B. S.; Miller, S. M.; Anderson, O. P.; Hughes, R. P.; Strauss, S. H. <i>Polyhedron</i> <b>2017</b> , <i>121</i> , 88. [Fe(C <sub>13</sub> H <sub>21</sub> ) <sub>2</sub> ]ReO <sub>4</sub>                                                                                                                                          |
| KETKOL   | 1.706 Å | Machura, B.; Gryca, I. <i>Polyhedron</i> <b>2013</b> , <i>53</i> , 83. [Re(OCH <sub>3</sub> )(P(C <sub>6</sub> H <sub>5</sub> ) <sub>3</sub> )Br(NC <sub>6</sub> H <sub>4</sub> CH <sub>3</sub> )(N <sub>2</sub> C <sub>10</sub> H <sub>9</sub> H)]ReO <sub>4</sub>                                                                                                                                          |
| LAJGUC   | 1.706 Å | Petyuk, M. Y.; Berezin, A. S.; Gushchin, A. L.; Bagryanskaya, I. Y.; Baranov, A. Y.; Artem'ev, A. V. <i>Inorg. Chim. Acta</i> <b>2012</b> , <i>516</i> , 120136. [Re(CO) <sub>3</sub> (C <sub>15</sub> H <sub>12</sub> N <sub>3</sub> PS)]ReO <sub>4</sub>                                                                                                                                                   |
| PUSSEB   | 1.706 Å | Wang, T.-F.; Hwu, C.-C.; Tsai, C.-W.; Wen, Y.-S. <i>J. Chem. Soc., Dalton Trans.</i> <b>1998</b> , 2091. [ReC <sub>16</sub> H <sub>19</sub> NO]ReO <sub>4</sub>                                                                                                                                                                                                                                              |
| AHISIU   | 1.707 Å | Thuery, P. <i>Inorg. Chem.</i> <b>2009</b> , <i>48</i> , 4497. [YbC <sub>84</sub> H <sub>92</sub> N <sub>56</sub> O <sub>23</sub> ][YbReC <sub>42</sub> H <sub>48</sub> N <sub>28</sub> O <sub>21</sub> ][YbReH <sub>10</sub> NO <sub>12</sub> ][Yb(H <sub>2</sub> O) <sub>8</sub> ](ReO <sub>4</sub> ) <sub>10</sub> ·(C <sub>42</sub> H <sub>42</sub> N <sub>28</sub> O <sub>14</sub> )·21H <sub>2</sub> O |
| BIWJOH   | 1.707 Å | Tooyama, Y.; Braband, H.; Spingler, B.; Abram, U.; Alberto, R. <i>Inorg. Chem.</i> <b>2008</b> , <i>47</i> , 257. [Re(O) <sub>3</sub> C <sub>16</sub> H <sub>22</sub> N <sub>6</sub> ]ReO <sub>4</sub>                                                                                                                                                                                                       |
| CELMUF   | 1.707 Å | You, X.; Rao, W.; Han, K.; Wang, L.; Zhang, M.; Wie, Z. <i>New J. Chem.</i> <b>2022</b> , <i>46</i> , 14404. (C <sub>7</sub> H <sub>15</sub> N <sub>2</sub> )ReO <sub>4</sub>                                                                                                                                                                                                                                |
| DEZMAX   | 1.707 Å | Booyesen, I.; Gerber, T. I. A.; Hosten, E.; Luzipo, D.; Mayer, P. <i>J. Coord. Chem.</i> <b>2007</b> , <i>60</i> , 635. [Re(P(C <sub>6</sub> H <sub>5</sub> ) <sub>3</sub> ) <sub>2</sub> Cl(C <sub>14</sub> H <sub>11</sub> N <sub>2</sub> O)]ReO <sub>4</sub> ·H <sub>2</sub> O                                                                                                                            |
| HUWDEJ   | 1.707 Å | Lin, H.; Wu, X.; Maggard, P. A. <i>Inorg. Chem.</i> <b>2009</b> , <i>48</i> , 11265. [AgC <sub>24</sub> H <sub>24</sub> N <sub>4</sub> ]ReO <sub>4</sub>                                                                                                                                                                                                                                                     |
| JOHBUF   | 1.707 Å | Malecki, J. G.; Palion, A.; Gryca, I.; Oboz, M.; Gron, T. <i>Polyhedron</i> <b>2014</b> , <i>76</i> , 10. [Cu(N <sub>2</sub> C <sub>11</sub> H <sub>16</sub> N <sub>2</sub> )(NO <sub>3</sub> )]ReO <sub>4</sub> ·CH <sub>3</sub> CN                                                                                                                                                                         |
| LANHIV   | 1.707 Å | Nadeem, Q.; Battistin, F.; Blacque, O.; Alberto, R. <i>Chem.-Eur. J.</i> <b>2022</b> , <i>28</i> , e202103566. [Re(C <sub>8</sub> H <sub>11</sub> N) <sub>2</sub> ]ReO <sub>4</sub>                                                                                                                                                                                                                          |
| LIMTUY   | 1.707 Å | Yokota, S.; Tsujimoto, K.; Hayashi, S.; Pointillart, F.; Ouahab, L.; Fujiwara, H. <i>Inorg. Chem.</i> <b>2013</b> , <i>52</i> , 6543. [Cu(NC <sub>15</sub> H <sub>9</sub> S <sub>5</sub> ) <sub>2</sub> ](ReO <sub>4</sub> ) <sub>2</sub>                                                                                                                                                                    |
| LIYFIK   | 1.707 Å | Mallick S.; Ghosh M. K.; Saha R.; Chattopadhyay, S. <i>Polyhedron</i> <b>2014</b> , <i>71</i> , 104. (C(NHC <sub>6</sub> H <sub>5</sub> ) <sub>3</sub> )ReO <sub>4</sub>                                                                                                                                                                                                                                     |
| NOXLUJ   | 1.707 Å | Massena, C. J.; Riel, A. M. S.; Neuhaus, G. F.; Decato, D. A.; Berryman, O. B. <i>Chem. Commun.</i> <b>2015</b> , <i>51</i> , 1417. (C <sub>22</sub> H <sub>16</sub> I <sub>2</sub> N <sub>2</sub> )(ReO <sub>4</sub> ) <sub>2</sub>                                                                                                                                                                         |
| QOLPUC   | 1.707 Å | Xu, L.; Perrero, J.; Patrick, B. O.; Orvig, C. <i>Inorg. Chem.</i> <b>2001</b> , <i>40</i> , 2005. [Re(O)Cl(N <sub>2</sub> C <sub>14</sub> H <sub>17</sub> N <sub>2</sub> )]ReO <sub>4</sub>                                                                                                                                                                                                                 |
| YICQUW   | 1.707 Å | Miyashita, Y.; Mahboob, N.; Tsuboi, S.; Yamada, Y.; Fujisawa, K.; Okamoto, K. <i>Bull. Chem. Soc. Jpn.</i> <b>2001</b> , <i>74</i> , 1295. [Rh <sub>2</sub> ReC <sub>12</sub> H <sub>36</sub> N <sub>6</sub> S <sub>6</sub> ](ReO <sub>4</sub> )Cl·4H <sub>2</sub> O                                                                                                                                         |
| AHISAM   | 1.708 Å | Thuery, P. <i>Inorg. Chem.</i> <b>2009</b> , <i>48</i> , 4497. [Yb(H <sub>2</sub> O) <sub>8</sub> ][YbReC <sub>36</sub> H <sub>44</sub> N <sub>24</sub> O <sub>20</sub> ](ReO <sub>4</sub> ) <sub>4</sub> ·(NO <sub>3</sub> ) <sub>3</sub> ·2H <sub>2</sub> O                                                                                                                                                |

|          |         |                                                                                                                                                                                                                                                                                                                    |
|----------|---------|--------------------------------------------------------------------------------------------------------------------------------------------------------------------------------------------------------------------------------------------------------------------------------------------------------------------|
| COPWUA   | 1.708 Å | Thuery, P. <i>Inorg. Chem.</i> <b>2009</b> , <i>48</i> , 825. [GdRe <sub>2</sub> UC <sub>36</sub> H <sub>50</sub> N <sub>25</sub> O <sub>32</sub> ](ReO <sub>4</sub> ) <sub>2</sub> ·4H <sub>2</sub> O                                                                                                             |
| HINRUT   | 1.708 Å | Baer, S. A.; Pothig, A.; Bawaked, S. M.; Schmidbaur, H.; Kraus, F. <i>Z. Naturforsch., Sect. B</i> <b>2013</b> , <i>68</i> , 1173. [Au(P(C <sub>6</sub> H <sub>5</sub> ) <sub>3</sub> ) <sub>2</sub> ]ReO <sub>4</sub>                                                                                             |
| IWOJAH   | 1.708 Å | Afanaseva, V. A.; Glinskaya, L. A.; Piryazev, D. A.; Gromilov, S. A. <i>Russ. J. Struct. Chem.</i> <b>2015</b> , <i>56</i> , 1629. [AuC <sub>9</sub> H <sub>19</sub> N <sub>4</sub> ](ReO <sub>4</sub> ) <sub>2</sub>                                                                                              |
| IZAMAY   | 1.708 Å | Baidina, I. A.; Makotchenko, E. V.; Shusharina, E. A.; Plyusnin, P. E.; Smolentsev, A. I.; Gromilov, S. A. <i>Russ. J. Struct. Chem.</i> <b>2010</b> , <i>51</i> , 544. [AuCl(H <sub>2</sub> N(CH <sub>2</sub> ) <sub>2</sub> NH(CH <sub>2</sub> ) <sub>2</sub> NH <sub>2</sub> )](ReO <sub>4</sub> ) <sub>2</sub> |
| QEXLEK   | 1.708 Å | Bondy, C. R.; Gale, P. A.; Loeb, S. J. <i>Chem. Commun.</i> <b>2001</b> , 729. [Pt(NC <sub>10</sub> H <sub>14</sub> NO) <sub>4</sub> ](ReO <sub>4</sub> ) <sub>2</sub>                                                                                                                                             |
| ZUZBEB   | 1.708 Å | He, Y.-X.; Batchelor, R. J.; Einstein, F. W. B.; Sutton, D. J. <i>Organometal. Chem.</i> <b>1996</b> , <i>509</i> , 37. [ReC <sub>17</sub> H <sub>34</sub> N <sub>2</sub> ]ReO <sub>4</sub> ·(CH <sub>3</sub> ) <sub>2</sub> CO                                                                                    |
| 416499   | 1.709 Å | Yusenko, K. V.; Baidina, I. A.; Gromilov, S. A.; Korenev, S. V. <i>Russ. J. Struct. Chem.</i> <b>2007</b> , <i>48</i> , 618. [Pt(NH <sub>3</sub> ) <sub>5</sub> Cl](ReO <sub>4</sub> ) <sub>3</sub> ·2H <sub>2</sub> O                                                                                             |
| AHIQIS   | 1.709 Å | Thuery, P. <i>Inorg. Chem.</i> <b>2009</b> , <i>48</i> , 4497. [GdKC <sub>30</sub> H <sub>38</sub> N <sub>21</sub> O <sub>17</sub> ] <sub>n</sub> (ReO <sub>4</sub> ) <sub>2</sub> ·4H <sub>2</sub> O                                                                                                              |
| IDIVAT   | 1.709 Å | Li X.-P.; Mei G.-Q.; Huang, H.-P.; Li, Y.-Z. <i>Acta Crystallogr., Sect. E</i> <b>2006</b> , <i>62</i> , m1281. (C <sub>12</sub> H <sub>9</sub> N <sub>2</sub> )ReO <sub>4</sub>                                                                                                                                   |
| MOCYUC   | 1.709 Å | Wan, M.; Wang, Y.-N.; Zhong, W.-H.; Chen, H.-R.; Li, Z.-M.; Shi, C.-H.; Cao, Q.-L.; Zhu, J.-Y.; Chen, L.-Z. <i>Chem. Mater.</i> <b>2023</b> , <i>35</i> , 8936. (C <sub>10</sub> H <sub>15</sub> FN)ReO <sub>4</sub>                                                                                               |
| LEBMAG   | 1.709 Å | Katti, K. V.; Singh, P. R.; Barnes, C. L.; Katti, K. K.; Kopicka, K.; Ketring, A. R.; Volkert, W. A. <i>Z. Naturforsch. Sect. B</i> <b>1993</b> , <i>48</i> , 1381. (PNH <sub>2</sub> (P(C <sub>6</sub> H <sub>5</sub> ) <sub>3</sub> ) <sub>3</sub> )ReO <sub>4</sub>                                             |
| SITZIF   | 1.709 Å | Booyesen, I.; Gerber, T. I. A.; Hosten, E.; Mayer, P. <i>Inorg. Chem. Commun.</i> <b>2008</b> , <i>11</i> , 33. [Re(N <sub>2</sub> C <sub>13</sub> H <sub>11</sub> N) <sub>2</sub> ]ReO <sub>4</sub>                                                                                                               |
| TAXPEO   | 1.709 Å | John, G. H.; May, I.; Sharrad, C. A.; Sutton, A. D.; Collison, D.; Helliwell, M.; Sarsfield, M. J. <i>Inorg. Chem.</i> <b>2005</b> , <i>44</i> , 7606. [ReUC <sub>75</sub> H <sub>67</sub> O <sub>11</sub> P <sub>6</sub> ](ReO <sub>4</sub> ) <sub>2</sub> ·2CH <sub>3</sub> CN                                   |
| TUTKOL   | 1.709 Å | Fu, D.-W.; Cai, H.-L.; Li, S.-H.; Ye, Q.; Zhou, L.; Zhang, W.; Zhang, Y.; Deng, F.; Xiong, R.-G. <i>Phys. Rev. Lett.</i> <b>2013</b> , <i>110</i> , 257601. ( <i>p</i> -H <sub>3</sub> NC <sub>6</sub> H <sub>4</sub> OCH <sub>3</sub> )ReO <sub>4</sub>                                                           |
| ZASYUP   | 1.709 Å | Isakov, D.; de M. Gomes, E.; Belsley, M. S.; Rodrigues, V. H.; Costa, M. M. R. <i>CrystEngComm</i> <b>2012</b> , <i>14</i> , 3767. (C <sub>6</sub> H <sub>15</sub> N <sub>4</sub> O <sub>2</sub> )ReO <sub>4</sub>                                                                                                 |
| BIWYUB02 | 1.710 Å | Rindorf, G.; Soling, H.; Thorup, N. <i>Acta Crystallogr., Sect. C</i> <b>1984</b> , <i>40</i> , 1137. (C <sub>10</sub> H <sub>12</sub> Se <sub>4</sub> )ReO <sub>4</sub> ·C <sub>10</sub> H <sub>12</sub> Se <sub>4</sub>                                                                                          |
| DIPQOK   | 1.710 Å | German, K. E.; Grigoriev, M. S.; Den Auwer, C.; Maruk, A. Y.; Obruchnikova, Y. A. <i>Russ. J. Inorg. Chem.</i> <b>2013</b> , <i>58</i> , 691. (( <i>n</i> -C <sub>3</sub> H <sub>7</sub> ) <sub>4</sub> )ReO <sub>4</sub>                                                                                          |
| HUWBUX   | 1.710 Å | Lin, H.; Wu, X.; Maggard, P. A. <i>Inorg. Chem.</i> <b>2009</b> , <i>48</i> , 11265. [AgC <sub>24</sub> H <sub>16</sub> N <sub>6</sub> ]ReO <sub>4</sub> ·H <sub>2</sub> O                                                                                                                                         |

|          |         |                                                                                                                                                                                                                                                                                                                                                      |
|----------|---------|------------------------------------------------------------------------------------------------------------------------------------------------------------------------------------------------------------------------------------------------------------------------------------------------------------------------------------------------------|
| POMKUY   | 1.710 Å | Rodrigues, V. H. Costa, M. M. R. R.; Dekola, T.; de Matos Gomes, E. <i>Acta Crystallogr., Sect. E</i> <b>2009</b> , 65, m19. (H <sub>3</sub> NCHCOOH)ReO <sub>4</sub> ·(H <sub>3</sub> NCHCOO)                                                                                                                                                       |
| SOSQUM   | 1.710 Å | Xu, L.; Setyawati, I. A.; Pierrero, J.; Pink, M.; Young Jr., V. G.; Patrick, B. O.; Rettig, S. J.; Orvig, C. <i>Inorg. Chem.</i> <b>2000</b> , 39, 5958. [ReC <sub>18</sub> H <sub>20</sub> N <sub>4</sub> O <sub>5</sub> ]ReO <sub>4</sub> ·CH <sub>3</sub> OH                                                                                      |
| VAJLEY   | 1.710 Å | Ray, U.; Chand, B.; Dasmahapatra, A. K.; Mostafa, G.; Lu, T.-H.; Sinha, C. <i>Inorg. Chem. Commun.</i> <b>2003</b> , 6, 634. (C <sub>12</sub> H <sub>15</sub> N <sub>4</sub> )ReO <sub>4</sub> ·H <sub>2</sub> O                                                                                                                                     |
| CATXEE   | 1.711 Å | Ming, M.; Zhou, H.; Mao, Y.-N.; Li, H.-R.; Chen, J. <i>Dalton Trans.</i> <b>2022</b> , 51, 4458. (Ag <sub>2</sub> ReC <sub>26</sub> H <sub>18</sub> N <sub>4</sub> O <sub>4</sub> ) <sub>n</sub> ReO <sub>4</sub>                                                                                                                                    |
| KEWNIN01 | 1.711 Å | Ghosh, R.; Ghosh, T. K.; Pramanik, S.; Islam, A. S. M.; Ghosh, P. <i>ACS Appl. Mater. Interfaces</i> <b>2023</b> , 15, 25184. (C <sub>30</sub> H <sub>38</sub> I <sub>4</sub> N <sub>8</sub> )(ReO <sub>4</sub> ) <sub>4</sub> ·2CH <sub>3</sub> CN                                                                                                  |
| IPOPUA   | 1.711 Å | Chan, C. Y.; Barnard, P. J. <i>Dalton Trans.</i> <b>2015</b> , 44, 19126. [Re(CO) <sub>3</sub> (C <sub>19</sub> H <sub>25</sub> N <sub>5</sub> )]ReO <sub>4</sub>                                                                                                                                                                                    |
| POXDOX   | 1.711 Å | Deiser, F.; Kraus, F.; Schmidbaur, H. <i>Chem. Commun.</i> <b>2015</b> , 51, 6746. [Ag(P(C <sub>6</sub> H <sub>5</sub> ) <sub>3</sub> ) <sub>4</sub> ]ReO <sub>4</sub>                                                                                                                                                                               |
| RAHHAL   | 1.711 Å | Makotchenko, E. V.; Baidina, I. A. <i>Russ. J. Struct. Chem.</i> <b>2011</b> , 52, 572. [Au(H <sub>2</sub> N(CH <sub>2</sub> ) <sub>2</sub> NH <sub>2</sub> ) <sub>2</sub> ](ReO <sub>4</sub> ) <sub>3</sub>                                                                                                                                         |
| SETSIW   | 1.711 Å | Kumagai, S.; Takaishi, S.; Gao, M.; Iguchi, H.; Breedlove, B. K.; Yamashita, M. <i>Inorg. Chem.</i> <b>2018</b> , 57, 3775. [Pt(H <sub>2</sub> N(CH <sub>2</sub> ) <sub>2</sub> NH <sub>2</sub> ) <sub>2</sub> ][PtBr <sub>2</sub> (H <sub>2</sub> N(CH <sub>2</sub> ) <sub>2</sub> NH <sub>2</sub> ) <sub>2</sub> ](ReO <sub>4</sub> ) <sub>4</sub> |
| WEZSAV   | 1.711 Å | Petrova, R.; Todorov, T.; Bakardjieva, S.; Mihailova, B.; Angelova, O. <i>Z. Kristallogr. – Cryst Mater.</i> <b>2000</b> , 215, 309. [Ca(OC(NH <sub>2</sub> ) <sub>2</sub> ) <sub>6</sub> ](ReO <sub>4</sub> ) <sub>2</sub>                                                                                                                          |
| WUTPEG   | 1.711 Å | Pawlicki, S. H.; Noll, B. C.; Dubois, M. R. <i>J. Coord. Chem.</i> <b>2003</b> , 56, 41. [ReC <sub>65</sub> H <sub>62</sub> ClOP <sub>3</sub> S]ReO <sub>4</sub>                                                                                                                                                                                     |
| XAGMUO   | 1.711 Å | Royo, B.; Herdtweck, E.; Romao, C. C. <i>Eur. J. Inorg. Chem.</i> <b>2004</b> , 3305. [Re(O) <sub>2</sub> (C <sub>9</sub> H <sub>16</sub> N <sub>2</sub> ) <sub>4</sub> ]ReO <sub>4</sub> ·C <sub>4</sub> H <sub>8</sub> O                                                                                                                           |
| AZENAV   | 1.712 Å | Maruk, A. Y.; Grigor'ev, M. S.; German, K. E. <i>Koord. Khim.</i> <b>2010</b> , 36, 381. (C <sub>6</sub> H <sub>5</sub> NH <sub>3</sub> )ReO <sub>4</sub>                                                                                                                                                                                            |
| COTTIO01 | 1.712 Å | Perruchas, S.; Fraxedas, J.; Canadell, E.; Auban-Senzier, P.; Batail, P. <i>Adv. Mater.</i> <b>2005</b> , 17, 209. (C <sub>10</sub> H <sub>12</sub> S <sub>4</sub> )ReO <sub>4</sub> ·C <sub>10</sub> H <sub>12</sub> S <sub>4</sub>                                                                                                                 |
| KEKLER   | 1.712 Å | Danopoulos, A. A.; Wong, A. C. C.; Wilkinson, G.; Hursthouse, M. B.; Hussain, B. <i>J. Chem. Soc., Dalton Trans.</i> <b>1990</b> , 315. [Re(N <sub>2</sub> C <sub>6</sub> H <sub>6</sub> ) <sub>3</sub> ]ReO <sub>4</sub> ·(CH <sub>3</sub> ) <sub>2</sub> CO                                                                                        |
| LAGDII   | 1.712 Å | Carlucci, L.; Ciani, G.; Maggini, S.; Proserpio, D. M.; Visconti, M. <i>Chem. – Eur. J.</i> <b>2010</b> , 16, 12328. [Ag <sub>3</sub> CdC <sub>51</sub> H <sub>27</sub> N <sub>6</sub> O <sub>6</sub> ] <sub>n</sub> (ReO <sub>4</sub> ) <sub>2</sub>                                                                                                |
| NUDZOE   | 1.712 Å | Ghosh, R.; Ghosh, T. K.; Ghosh, P. <i>Dalton Trans.</i> <b>2020</b> , 49, 3039. (C <sub>6</sub> (C <sub>6</sub> H <sub>10</sub> N <sub>2</sub> ) <sub>6</sub> )(ReO <sub>4</sub> ) <sub>6</sub> ·2H <sub>2</sub> O                                                                                                                                   |
| WEZQUN   | 1.712 Å | Petrova, R.; Todorov, T.; Bakardjieva, S.; Mihailova, B.; Angelova, O. <i>Z. Kristallogr. – Cryst Mater.</i> <b>2000</b> , 215, 309. [Cd(OC(NH <sub>2</sub> ) <sub>2</sub> ) <sub>6</sub> ](ReO <sub>4</sub> ) <sub>2</sub>                                                                                                                          |
| ZUYKEL   | 1.712 Å | Riel, A. M. S.; Decato, D. A.; Berryman, O. B. <i>Cryst. Growth Des.</i> <b>2016</b> , 16, 974. (C <sub>21</sub> H <sub>15</sub> N <sub>2</sub> )ReO <sub>4</sub>                                                                                                                                                                                    |
| 74505    | 1.713 Å | Rögner, P.; Range, K. J. <i>Z. Naturforsch., Sect. B</i> <b>1993</b> , 48, 685. CsReO <sub>4</sub>                                                                                                                                                                                                                                                   |

|          |         |                                                                                                                                                                                                                                                                                                                                                                                            |
|----------|---------|--------------------------------------------------------------------------------------------------------------------------------------------------------------------------------------------------------------------------------------------------------------------------------------------------------------------------------------------------------------------------------------------|
| 421685   | 1.713 Å | Baidina, I. A.; Filatov, E. Y.; Makotchenko, E. V.; Smolentsev, A. I. <i>J. Struct. Chem.</i> <b>2012</b> , <i>53</i> , 112. [Co(NH <sub>3</sub> ) <sub>5</sub> H <sub>2</sub> O](ReO <sub>4</sub> ) <sub>3</sub> ·2H <sub>2</sub> O                                                                                                                                                       |
| AHISEQ   | 1.713 Å | Thuery, P. <i>Inorg. Chem.</i> <b>2009</b> , <i>48</i> , 4497. [Lu(H <sub>2</sub> O) <sub>8</sub> ][LuRe <sub>2</sub> C <sub>36</sub> H <sub>44</sub> N <sub>24</sub> O <sub>20</sub> ](ReO <sub>4</sub> ) <sub>4</sub> ·(NO <sub>3</sub> ) <sub>3</sub> ·2H <sub>2</sub> O                                                                                                                |
| AXABAF   | 1.713 Å | Mroweh, N.; Bogdan, A.; Pop, F.; Auban-Senzier, P.; Vanthuyne, N.; Lopes, E. B.; Almeida, M.; Avarvari, N. <i>Magnetochem.</i> <b>2021</b> , <i>7</i> , 87. (C <sub>10</sub> H <sub>10</sub> S <sub>6</sub> )ReO <sub>4</sub>                                                                                                                                                              |
| EVOFIG02 | 1.713 Å | Gansle, K. M.; Gash, A. E.; Chambliss, C. K.; Clapsaddle, B. J.; Newell, B. S.; Miller, S. M.; Anderson, O. P.; Hughes, R. P.; Strauss, S. H. <i>Polyhedron</i> <b>2017</b> , <i>121</i> , 88. [Fe(C <sub>13</sub> H <sub>21</sub> ) <sub>2</sub> ] <sub>2</sub> ReO <sub>4</sub> ·(CH <sub>3</sub> ) <sub>2</sub> CO                                                                      |
| FAWCUF   | 1.713 Å | Wan, M.; Wang, Y.-N.; Liu, J.-Y.; Tong, L.; Ye, S.-Y.; Li, J.-Y.; Chen, L.-Z. <i>CrystEngComm</i> <b>2022</b> , <i>24</i> , 782. (C <sub>8</sub> H <sub>17</sub> BrN <sub>2</sub> )(ReO <sub>4</sub> ) <sub>2</sub>                                                                                                                                                                        |
| HALGUA   | 1.713 Å | Xie, Y.; Zheng, J.; Zheng, K.; Liu, Q.; Duan, J.; Chen, W.; Shao, S.; Cai, H. <i>Chem. Mater.</i> <b>2021</b> , <i>33</i> , 3081. (C <sub>7</sub> H <sub>14</sub> N)ReO <sub>4</sub>                                                                                                                                                                                                       |
| HALHAH   | 1.713 Å | Xie, Y.; Zheng, J.; Zheng, K.; Liu, Q.; Duan, J.; Chen, W.; Shao, S.; Cai, H. <i>Chem. Mater.</i> <b>2021</b> , <i>33</i> , 3081. (C <sub>8</sub> H <sub>16</sub> N)ReO <sub>4</sub>                                                                                                                                                                                                       |
| KETKUR   | 1.713 Å | Machura, B.; Gryca, I. <i>Polyhedron</i> <b>2013</b> , <i>53</i> , 83. [Re(OCH <sub>3</sub> )(P(C <sub>6</sub> H <sub>5</sub> ) <sub>3</sub> )Cl(NC <sub>6</sub> H <sub>4</sub> CH <sub>3</sub> )(N <sub>2</sub> C <sub>10</sub> H <sub>9</sub> H)]ReO <sub>4</sub>                                                                                                                        |
| WIHHAA   | 1.713 Å | Wenhui, H.; Xing, Y.; Ziyu, W.; Zhenhong, W.; Wenjun, R.; Hu, C. <i>Chin. Inorg. Chem.</i> <b>2022</b> , <i>38</i> , 1586. (C <sub>9</sub> H <sub>24</sub> N <sub>4</sub> )(ReO <sub>4</sub> ) <sub>2</sub>                                                                                                                                                                                |
| PEGTED   | 1.713 Å | Morris, D. S.; van Rees, K.; Curcio, M.; Cokoja, M.; Kuhn, F. E.; Duarte, F.; Love, J. B. <i>Cat. Sci. Tech.</i> <b>2017</b> , <i>7</i> , 5644. (C <sub>7</sub> H <sub>10</sub> N)ReO <sub>4</sub>                                                                                                                                                                                         |
| QUYKEC   | 1.713 Å | Hou, X.; Li, X.; Ye, H. <i>Polyhedron</i> <b>2015</b> , <i>102</i> , 657. (C <sub>10</sub> H <sub>10</sub> N <sub>2</sub> O <sub>2</sub> )(ReO <sub>4</sub> ) <sub>2</sub> ·C <sub>10</sub> H <sub>8</sub> N <sub>2</sub> O <sub>2</sub> ·2H <sub>2</sub> O                                                                                                                                |
| RASQEH   | 1.713 Å | Petrova, R.; Angelova, O.; Macicek, J. <i>Acta Crystallogr., Sect. C</i> <b>1997</b> , <i>53</i> , 565. [Cd(SC(NH <sub>2</sub> ) <sub>2</sub> ) <sub>6</sub> ](ReO <sub>4</sub> ) <sub>2</sub> ·H <sub>2</sub> O                                                                                                                                                                           |
| WOLSOG   | 1.713 Å | Carruthers, C.; Ronson, T. K.; Sumby, C. J.; Westcott, A.; Harding, L. P.; Prior, T. J.; Rizkallah, P.; Hardie, M. J. <i>Chem. – Eur. J.</i> <b>2008</b> , <i>14</i> , 10286. [AgC <sub>36</sub> H <sub>36</sub> N <sub>6</sub> O <sub>6</sub> ] <sub>n</sub> ReO <sub>4</sub> ·CH <sub>3</sub> CN                                                                                         |
| ABIWOR   | 1.714 Å | Fidalgo, E. G.; Plasseraud, L.; Stoeckli-Evans, H.; Suss-Fink, G. <i>Inorg. Chem. Commun.</i> <b>2001</b> , <i>4</i> , 308. [Ru <sub>2</sub> Cl <sub>2</sub> (OH)( <i>p</i> -C <sub>6</sub> H <sub>4</sub> (CH <sub>3</sub> )( <i>i</i> -C <sub>3</sub> H <sub>7</sub> )) <sub>2</sub> ] <sub>2</sub> ReO <sub>4</sub>                                                                     |
| EKAVOE   | 1.714 Å | Thevenet, A.; Miljkovic, A.; La Cognata, S.; Marie, C.; Tamain, C.; Boubals, N.; Mangano, C.; Amendola, V.; Guilbaud, P. <i>Dalton Trans.</i> <b>2021</b> , <i>50</i> , 1620. (C <sub>36</sub> H <sub>48</sub> F <sub>12</sub> N <sub>8</sub> )ReO <sub>4</sub> (CF <sub>3</sub> SO <sub>3</sub> ) <sub>5</sub> ·5H <sub>2</sub> O                                                         |
| MOCZAJ   | 1.714 Å | Wan, M.; Wang, Y.-N.; Zhong, W.-H.; Chen, H.-R.; Li, Z.-M.; Shi, C.-H.; Cao, Q.-L.; Zhu, J.-Y.; Chen, L.-Z. <i>Chem. Mater.</i> <b>2023</b> , <i>35</i> , 8936. (C <sub>10</sub> H <sub>15</sub> BrN)ReO <sub>4</sub>                                                                                                                                                                      |
| IXAZIR   | 1.714 Å | Katayev, E. A.; Kolesnikov, G. V.; Khrustalev, V. N.; Antipin, M. Y.; Askerov, R. K.; Maharramov, A. M.; German, K. E.; Kirakosyan, G. A.; Tananaev, I. G.; Timofeeva, T. V. <i>J. Radioanalytical Nucl. Chem.</i> <b>2009</b> , <i>282</i> , 385. (C <sub>45</sub> H <sub>47</sub> N <sub>7</sub> O <sub>2</sub> )(ReO <sub>4</sub> ) <sub>2</sub> ·2ClH <sub>2</sub> CCH <sub>2</sub> Cl |



|        |         |                                                                                                                                                                                                                                                                                                                      |
|--------|---------|----------------------------------------------------------------------------------------------------------------------------------------------------------------------------------------------------------------------------------------------------------------------------------------------------------------------|
| ONELOL | 1.714 Å | Li, C.-P.; Zhou, H.; Wang, J.-J.; Liu, B.-L.; Wang, S.; Yang, X.; Wang, Z.-L.; Liu, C.-S.; Du, M.; Zhou, W. <i>ACS Appl. Mater. Interfaces</i> <b>2019</b> , <i>11</i> , 42375. [AgC <sub>17</sub> H <sub>12</sub> N <sub>6</sub> ] <sub>n</sub> ReO <sub>4</sub>                                                    |
| OROWAV | 1.714 Å | Harada, J.; Shimojo, T.; Oyamaguchi, H.; Hasegawa, H.; Takahashi, Y.; Satomi, K.; Suzuki, Y.; Kawamata, J.; Inabe, T. <i>Nature Chem.</i> <b>2016</b> , <i>8</i> , 946. (C <sub>7</sub> H <sub>14</sub> N)ReO <sub>4</sub>                                                                                           |
| PUFPOY | 1.714 Å | Thevenet, A.; Marie, C.; Tamain, C.; Amendola, V.; Miljkovic, A.; Guillaumont, D.; Boubals, N.; Guilbaud, P. <i>Dalton Trans.</i> <b>2020</b> , <i>49</i> , 1446. (C <sub>36</sub> H <sub>60</sub> N <sub>8</sub> ) <sub>2</sub> (ReO <sub>4</sub> ) <sub>3</sub> (NO <sub>3</sub> ) <sub>7</sub> ·6H <sub>2</sub> O |
| QAJSIG | 1.714 Å | Schmitt, B.; Sabanci, N.; Dedeoglu, B.; Aviyente, V.; Hosten, E.; Gerber, T. I. A.; Habarurema, G. A. S. <i>Afr. J. Chem.</i> <b>2014</b> , <i>67</i> , 189. [ReBr(P(C <sub>6</sub> H <sub>5</sub> ) <sub>3</sub> ) <sub>2</sub> (N <sub>2</sub> OC <sub>13</sub> H <sub>9</sub> )]BrReO <sub>4</sub>                |
| UFELEZ | 1.714 Å | Fan, G.-M.; Shi, C.; Qiao, L.; Li, H.-J.; Ye, H.-Y. <i>J. Mater. Chem. C</i> <b>2018</b> , <i>6</i> , 8349. NH <sub>4</sub> (C <sub>7</sub> H <sub>16</sub> N <sub>2</sub> )ReO <sub>4</sub>                                                                                                                         |
| UWIRUQ | 1.714 Å | Djemel, A.; Stefanczyk, O.; Desplanches, C.; Kumar, K.; Delimi, R.; Benaceur, F.; Ohkoshi, S.-I.; Chastanet, G. <i>Inorg. Chem. Front.</i> <b>2021</b> , <i>8</i> , 3210. [Fe(N <sub>3</sub> CC <sub>11</sub> H <sub>9</sub> N) <sub>2</sub> ](ReO <sub>4</sub> ) <sub>2</sub> ·3H <sub>2</sub> O                    |
| XAPTUD | 1.714 Å | Zhou, Z.; Xing, Y.; Wu, Y. <i>J. Inclusion Phenom. Macrocyclic Chem.</i> <b>1999</b> , <i>34</i> , 219. [NaC <sub>60</sub> H <sub>80</sub> O <sub>12</sub> ]ReO <sub>4</sub> ·H <sub>2</sub> O                                                                                                                       |
| AHIPUD | 1.715 Å | Thuery, P. <i>Inorg. Chem.</i> <b>2009</b> , <i>48</i> , 4497. [CeKC <sub>30</sub> H <sub>34</sub> N <sub>22</sub> O <sub>18</sub> ] <sub>n</sub> (ReO <sub>4</sub> ) <sub>2</sub> ·3H <sub>2</sub> O                                                                                                                |
| DELZUQ | 1.715 Å | Fuma, Y.; Ebihara, M. <i>Acta Crystallogr., Sect. E</i> <b>2006</b> , <i>62</i> , m1898. [(Re(H <sub>2</sub> O)(NHOCCH <sub>3</sub> ) <sub>2</sub> )]ReO <sub>4</sub>                                                                                                                                                |
| HIDMEN | 1.715 Å | Cowley, A. R.; Dilworth, J. R.; Salichou, M. <i>Dalton Trans.</i> <b>2007</b> , 1621. [ReCl <sub>3</sub> (C <sub>10</sub> H <sub>10</sub> N <sub>6</sub> )]ReO <sub>4</sub> ·CHCl <sub>3</sub>                                                                                                                       |
| MOCDAN | 1.715 Å | Wan, M.; Wang, Y.-N.; Zhong, W.-H.; Chen, H.-R.; Li, Z.-M.; Shi, C.-H.; Cao, Q.-L.; Zhu, J.-Y.; Chen, L.-Z. <i>Chem. Mater.</i> <b>2023</b> , <i>35</i> , 8936. (C <sub>10</sub> H <sub>15</sub> ClN)ReO <sub>4</sub>                                                                                                |
| 5920   | 1.715 Å | Chay, C.; Avdeev, M.; Brand, H. E. A.; Injac, S.; Whittle, T. A.; Kennedy, B. J. <i>Dalton Trans.</i> <b>2019</b> , <i>48</i> , 17524. CsReO <sub>4</sub>                                                                                                                                                            |
| 37118  | 1.715 Å | Bets, T.; Hoppe, R. <i>Z. Anorg. Allg. Chem.</i> <b>1983</b> , <i>500</i> , 23. LiReO <sub>4</sub>                                                                                                                                                                                                                   |
| COPWIO | 1.715 Å | Thuery, P. <i>Inorg. Chem.</i> <b>2009</b> , <i>48</i> , 825. [SmRe <sub>2</sub> UC <sub>36</sub> H <sub>50</sub> N <sub>25</sub> O <sub>32</sub> ](ReO <sub>4</sub> ) <sub>2</sub> ·4H <sub>2</sub> O                                                                                                               |
| ITELUR | 1.715 Å | Ghosh, R.; Ghosh, T. K.; Ghosh, P. <i>Chem. Commun.</i> <b>2021</b> , <i>57</i> , 5578. (C <sub>42</sub> H <sub>48</sub> N <sub>12</sub> )(ReO <sub>4</sub> ) <sub>6</sub> ·3H <sub>2</sub> O                                                                                                                        |
| KUCBUH | 1.715 Å | Reich, R. M.; Cokoja, M.; Markovits, I. I. E.; Munchmeyer, C. J.; Kaposi, M.; Pothig, A.; Herrmann, W. A.; Kuhn, F. E. <i>Dalton Trans.</i> <b>2015</b> , <i>44</i> , 8669. (C <sub>13</sub> H <sub>17</sub> N <sub>2</sub> )ReO <sub>4</sub>                                                                        |
| ROGYAP | 1.715 Å | orstanje, T. J.; Lutz, M.; Jastrzebski, J. T. B. H.; Gebbink, R. J. M. K. <i>Organometallics</i> <b>2014</b> , <i>33</i> , 2201. [Re(O)Cl <sub>2</sub> (C <sub>31</sub> H <sub>51</sub> NP <sub>2</sub> )]ReO <sub>4</sub>                                                                                           |
| WERBEA | 1.715 Å | Gowda, N. M. M.; Zhang, L.; Barnes, C. L. <i>J. Chem. Cryst.</i> <b>1994</b> , <i>24</i> , 89. (C <sub>19</sub> H <sub>22</sub> N <sub>2</sub> S)ReO <sub>4</sub>                                                                                                                                                    |
| XACHOA | 1.715 Å | Lin, H.; Maggard, P. A. <i>Inorg. Chem.</i> <b>2009</b> , <i>48</i> , 8940. [Cu <sub>2</sub> C <sub>40</sub> H <sub>32</sub> N <sub>8</sub> ] <sub>n</sub> (ReO <sub>4</sub> ) <sub>2</sub> ·H <sub>2</sub> O                                                                                                        |
| 5922   | 1.716 Å | Chay, C.; Avdeev, M.; Brand, H. E. A.; Injac, S.; Whittle, T. A.; Kennedy, B. J. <i>Dalton Trans.</i> <b>2019</b> , <i>48</i> , 17524. TlReO <sub>4</sub>                                                                                                                                                            |
| SEFBIS | 1.716 Å | Das, S.; Saha, A.; Sahu, M.; Mondal, A.; Malla Reddy, C. <i>Angew. Chem., Int. Ed.</i> <b>2022</b> , <i>61</i> , e202115359. ((CH <sub>3</sub> ) <sub>2</sub> NH <sub>2</sub> )ReO <sub>4</sub>                                                                                                                      |

|          |         |                                                                                                                                                                                                                                                                                                                          |
|----------|---------|--------------------------------------------------------------------------------------------------------------------------------------------------------------------------------------------------------------------------------------------------------------------------------------------------------------------------|
| 5921     | 1.716 Å | Chay, C.; Avdeev, M.; Brand, H. E. A.; Injac, S.; Whittle, T. A.; Kennedy, B. J. <i>Dalton Trans.</i> <b>2019</b> , 48, 17524. RbReO <sub>4</sub>                                                                                                                                                                        |
| 101356   | 1.716 Å | Conrad, M.; Schleid, T. Z. <i>Anorg. Allg. Chem.</i> <b>2019</b> , 645, 1255. CaNa(ReO <sub>4</sub> ) <sub>3</sub>                                                                                                                                                                                                       |
| CUYLEN10 | 1.716 Å | Herrmann, W. A.; Serrano, R.; Kusthardt, U.; Guggolz, E.; Nuber, B.; Ziegler, M. L. <i>J. Organometal. Chem.</i> <b>1985</b> , 287, 329. [ReO <sub>6</sub> (C <sub>10</sub> H <sub>15</sub> ) <sub>3</sub> ](ReO <sub>4</sub> ) <sub>2</sub> ·CH <sub>2</sub> Cl <sub>2</sub>                                            |
| GEJXAW   | 1.716 Å | Shakirova, O. G.; Daletsky, V. A.; Lavrenova, L. G.; Kurat'eva, N. V.; Shusharina, E. A.; Sheludyakova, L. A.; Vasilevsky, S. F. <i>Koord. Khim.</i> <b>2011</b> , 37, 511. [Fe(C <sub>10</sub> H <sub>10</sub> N <sub>6</sub> ) <sub>2</sub> ](ReO <sub>4</sub> ) <sub>2</sub>                                          |
| GIMREC   | 1.716 Å | Rice, C. R.; Slater, C.; Faulkner, R. A.; Allan, R. L. <i>Angew. Chem., Int. Ed.</i> <b>2018</b> , 57, 13071. [Cu <sub>3</sub> C <sub>61</sub> H <sub>60</sub> N <sub>20</sub> O <sub>3</sub> S <sub>6</sub> ][ReO <sub>4</sub> (CF <sub>3</sub> SO <sub>3</sub> ) <sub>3</sub> ·CH <sub>3</sub> CN·1.63H <sub>2</sub> O |
| GUTJIP   | 1.716 Å | Das, B.; Sarkar, S.; Zangrando, E.; Chattopadhyay, P. <i>Inorg. Chem. Commun.</i> <b>2009</b> , 12, 1112. [CuC <sub>14</sub> H <sub>16</sub> ClN <sub>2</sub> S <sub>2</sub> ][ReO <sub>4</sub>                                                                                                                          |
| HUWCAE   | 1.716 Å | Lin, H.; Wu, X.; Maggard, P. A. <i>Inorg. Chem.</i> <b>2009</b> , 48, 11265. [AgC <sub>12</sub> H <sub>10</sub> N <sub>2</sub> O <sub>4</sub> ][ReO <sub>4</sub> ·H <sub>2</sub> O                                                                                                                                       |
| TIHNEH   | 1.716 Å | Savastano, M.; Cappanni, C.; Bazzicalupi, C.; Lofrumento, C.; Bianchi, A. <i>Crystals</i> <b>2023</b> , 13, 823. (C <sub>19</sub> H <sub>24</sub> N <sub>8</sub> O <sub>2</sub> )(ReO <sub>4</sub> ) <sub>2</sub>                                                                                                        |
| LIDBUX   | 1.716 Å | Sharutin, V. V.; Senchurin, V. S.; Fastovets, O. A. <i>Butlerov Commun.</i> 2009, 16, 36-4. (PCH <sub>3</sub> (C <sub>6</sub> H <sub>5</sub> ) <sub>3</sub> )ReO <sub>4</sub>                                                                                                                                            |
| LIWSER   | 1.716 Å | Amendola, V.; Bergamaschi, G.; Boiocchi, M.; Alberto, R.; Braband, H. <i>Chem. Sci.</i> <b>2014</b> , 5, 1820. (C <sub>44</sub> H <sub>64</sub> N <sub>8</sub> )ReO <sub>4</sub> (CF <sub>3</sub> SO <sub>3</sub> ) <sub>5</sub> ·7H <sub>2</sub> O                                                                      |
| XUJWOO   | 1.716 Å | Chryssou, K.; Pelecanou, M.; Pirmettis, I. C.; Papadopoulos, M. S.; Raptopoulou, C.; Terzis, A.; Chiotellis, E.; Stassinopoulou, C. I. <i>Inorg. Chem.</i> <b>2002</b> , 41, 4653. [ReC <sub>23</sub> H <sub>39</sub> N <sub>3</sub> OS <sub>3</sub> ][ReO <sub>4</sub>                                                  |
| YECFER   | 1.716 Å | Xiao, J.; Puddephatt, R. J.; Manojlovic-Muir, L.; Muir, K. W.; Torabi, A. A. <i>J. Am. Chem. Soc.</i> <b>1994</b> , 116, 1129. [Pt <sub>3</sub> ReC <sub>75</sub> H <sub>66</sub> O <sub>3</sub> P <sub>6</sub> ][ReO <sub>4</sub>                                                                                       |
| 40397    | 1.717 Å | Picard, J. P.; Besse, J. P.; Chevalier, R.; Gasperin, M. <i>J. Solid State Chem.</i> <b>1988</b> , 75, 205. Ca(ReO <sub>4</sub> ) <sub>2</sub> ·2H <sub>2</sub> O                                                                                                                                                        |
| 79692    | 1.717 Å | Todorov, T.; Macicek, J. <i>Acta Crystallogr., Sect. C</i> <b>1995</b> , 51, 1034. Ba(ReO <sub>4</sub> ) <sub>2</sub> ·H <sub>2</sub> O                                                                                                                                                                                  |
| FAWCUF   | 1.717 Å | Wan, M.; Wang, Y.-N.; Liu, J.-Y.; Tong, L.; Ye, S.-Y.; Li, J.-Y.; Chen, L.-Z. <i>CrystEngComm</i> <b>2022</b> , 24, 782. (C <sub>8</sub> H <sub>17</sub> BrN <sub>2</sub> )(ReO <sub>4</sub> ) <sub>2</sub>                                                                                                              |
| HIRGEY   | 1.717 Å | Bagchi, S.; Kamilya, S.; Mehta, S.; Mandal, S.; Bandyopadhyay, A.; Narayan, A.; Ghosh, S.; Mondal, A. <i>Dalton Trans.</i> <b>2023</b> , 52, 11335. [MnC <sub>22</sub> H <sub>24</sub> Br <sub>2</sub> N <sub>4</sub> O <sub>2</sub> ][ReO <sub>4</sub>                                                                  |
| MECVUP   | 1.717 Å | Georgieva, I.; Kossev, K.; Titorenkova, R.; Petrova, N.; Zahariev, T.; Nikolova, R. <i>J. Solid State Chem.</i> <b>2022</b> , 312, 123263. [Mg(OC(NH <sub>2</sub> ) <sub>2</sub> ) <sub>4</sub> (H <sub>2</sub> O) <sub>2</sub> ](ReO <sub>4</sub> ) <sub>2</sub>                                                        |
| KUCCOC   | 1.717 Å | Reich, R. M.; Cokoja, M.; Markovits, I. I. E.; Munchmeyer, C. J.; Kaposi, M.; Pothig, A.; Herrmann, W. A.; Kuhn, F. E. <i>Dalton Trans.</i> <b>2015</b> , 44, 8669. (C <sub>13</sub> H <sub>12</sub> F <sub>5</sub> N <sub>2</sub> )ReO <sub>4</sub>                                                                     |

|          |         |                                                                                                                                                                                                                                                                                                                                                              |
|----------|---------|--------------------------------------------------------------------------------------------------------------------------------------------------------------------------------------------------------------------------------------------------------------------------------------------------------------------------------------------------------------|
| MOWJUF   | 1.717 Å | Cokoja, M.; Markovits, I. I. E.; Anthofer, M. H.; Poplata, S.; Pothig, A.; Morris, D. S.; Tasker, P. A.; Herrmann, W. A.; Kuhn, F. E.; Love, J. B. <i>Chem. Commun.</i> <b>2015</b> , <i>51</i> , 3399. (C <sub>28</sub> H <sub>50</sub> N <sub>3</sub> O <sub>2</sub> )ReO <sub>4</sub>                                                                     |
| PEGTIH   | 1.717 Å | Morris, D. S.; van Rees, K.; Curcio, M.; Cokoja, M.; Kuhn, F. E.; Duarte, F.; Love, J. B. <i>Cat. Sci. Tech.</i> <b>2017</b> , <i>7</i> , 5644. (C <sub>6</sub> H <sub>14</sub> N)ReO <sub>4</sub>                                                                                                                                                           |
| POMKUY01 | 1.717 Å | Dekola, T.; Isakov, D.; de M.Gomes, E.; Rodrigues, V. H. N.; Costa, M. M. R. R. <i>Eur. Phys. J. B</i> <b>2009</b> , <i>68</i> , 519. (H <sub>3</sub> NCHCOOH)ReO <sub>4</sub> ·(H <sub>3</sub> NCHCOO)                                                                                                                                                      |
| WURKIG   | 1.717 Å | Andreev, G.; Budantseva, N.; Sokolova, M.; Fedoseev, A. <i>Inorg. Chem.</i> <b>2020</b> , <i>59</i> , 11357. [Np(OS(CH <sub>3</sub> ) <sub>2</sub> ) <sub>8</sub> (OReO <sub>3</sub> )](ReO <sub>4</sub> ) <sub>3</sub>                                                                                                                                      |
| WURMUU   | 1.717 Å | Andreev, G.; Budantseva, N.; Sokolova, M.; Fedoseev, A. <i>Inorg. Chem.</i> <b>2020</b> , <i>59</i> , 11357. [Pu(OS(CH <sub>3</sub> ) <sub>2</sub> ) <sub>8</sub> ](ReO <sub>4</sub> ) <sub>4</sub>                                                                                                                                                          |
| 83343    | 1.718 Å | Angelova, O.; Macicek, J. Z. <i>Kristallogr.</i> <b>1996</b> , <i>211</i> , 513. Sr(ReO <sub>4</sub> ) <sub>2</sub> ·3OC(NH <sub>2</sub> ) <sub>2</sub> ·2H <sub>2</sub> O                                                                                                                                                                                   |
| COPXAH   | 1.718 Å | Thuery, P. <i>Inorg. Chem.</i> <b>2009</b> , <i>48</i> , 825. [LuRe <sub>2</sub> UC <sub>36</sub> H <sub>50</sub> N <sub>25</sub> O <sub>32</sub> ](ReO <sub>4</sub> ) <sub>2</sub> ·4H <sub>2</sub> O                                                                                                                                                       |
| FAWDIU   | 1.718 Å | Wan, M.; Wang, Y.-N.; Liu, J.-Y.; Tong, L.; Ye, S.-Y.; Li, J.-Y.; Chen, L.-Z. <i>CrystEngComm</i> <b>2022</b> , <i>24</i> , 782. (C <sub>8</sub> H <sub>17</sub> FN <sub>2</sub> )(ReO <sub>4</sub> ) <sub>2</sub>                                                                                                                                           |
| EKIPOG   | 1.718 Å | Cortat, Y.; Crochet, A.; Zobi, F. CCDC deposition number 2057808, <b>2021</b> . (((CH <sub>3</sub> ) <sub>2</sub> N) <sub>2</sub> CC(N(CH <sub>3</sub> ) <sub>2</sub> ) <sub>2</sub> )BrReO <sub>4</sub> ·0.5CH <sub>2</sub> Cl <sub>2</sub>                                                                                                                 |
| FAYSUV   | 1.718 Å | Sanchez, I.; Campo, J. A.; Heras, J. V.; Torres, M. R.; Cano, M. <i>J. Mater. Chem.</i> <b>2012</b> , <i>22</i> , 13329. (C <sub>10</sub> H <sub>11</sub> N <sub>2</sub> O)ReO <sub>4</sub>                                                                                                                                                                  |
| FIQKUN   | 1.718 Å | Kato, M.; Shirahata, T.; Misaki, Y. <i>Chem. Lett.</i> <b>2013</b> , <i>42</i> , 1548. (C <sub>22</sub> H <sub>14</sub> OS <sub>8</sub> )ReO <sub>4</sub> ·ClH <sub>2</sub> CCH <sub>2</sub> Cl                                                                                                                                                              |
| FONRUV   | 1.718 Å | Oliveira, M. A.; Miranda, J. M.; Castellano, E. E.; Scoralick, E.; Zinner, L. B.; Vicentini, C. <i>Lanth. Actin. Res.</i> <b>1986</b> , <i>1</i> , 205. [NdReC <sub>12</sub> H <sub>32</sub> O <sub>14</sub> S <sub>6</sub> ] <sub>n</sub> (ReO <sub>4</sub> ) <sub>2</sub> ·C <sub>4</sub> H <sub>8</sub> O <sub>2</sub> S <sub>2</sub>                     |
| HUCNOI   | 1.718 Å | Zhang, C.; Guzei, I. A.; Espenson, J. H. <i>Organometallics</i> <b>2000</b> , <i>19</i> , 5257. [SnRe <sub>2</sub> C <sub>44</sub> H <sub>50</sub> Cl <sub>2</sub> N <sub>8</sub> O <sub>4</sub> ](ReO <sub>4</sub> ) <sub>2</sub>                                                                                                                           |
| KEDKIR   | 1.718 Å | Skabitskii, I. V.; Shapovalov, S. S. <i>Russ. J. Coord. Chem.</i> <b>2021</b> , <i>48</i> , 180. [ReC <sub>21</sub> H <sub>23</sub> B <sub>2</sub> N <sub>14</sub> O <sub>3</sub> ](ReO <sub>4</sub> ) <sub>2</sub> ·2(CH <sub>3</sub> ) <sub>2</sub> CO                                                                                                     |
| MOWNET   | 1.718 Å | Arrigo, L. M.; Galenas, M.; Bassil, D. B.; Tucker, S. A.; Kannan, R.; Katti, K. V.; Barnes, C. L.; Jurisson, S. S. <i>Radiochim. Acta</i> <b>2008</b> , <i>96</i> , 835. (C <sub>14</sub> H <sub>9</sub> (PNH(C <sub>6</sub> H <sub>5</sub> ) <sub>2</sub> ))ReO <sub>4</sub>                                                                                |
| PIDTOL01 | 1.718 Å | Herrmann, W. A.; Roesky, P. W.; Kuhn, F. E.; Elison, M.; Artus, G.; Scherer, W.; Romao, C. C.; Lopes, A.; Basset, J.-M. <i>Inorg. Chem.</i> <b>1995</b> , <i>34</i> , 4701. [Re(O) <sub>3</sub> (N <sub>3</sub> C <sub>9</sub> H <sub>21</sub> )]ReO <sub>4</sub>                                                                                            |
| POVCAG   | 1.718 Å | Browne, A. R.; Deligonul, N.; Anderson, B. L.; Rheingold, A. L.; Gray, T. G. <i>Chem. – Eur. J.</i> <b>2014</b> , <i>20</i> , 17552. [AuC <sub>43</sub> H <sub>35</sub> OP <sub>2</sub> ](ReO <sub>4</sub> ) <sub>2</sub>                                                                                                                                    |
| SETRUH   | 1.718 Å | Kumagai, S.; Takaishi, S.; Gao, M.; Iguchi, H.; Breedlove, B. K.; Yamashita, M. <i>Inorg. Chem.</i> <b>2018</b> , <i>57</i> , 3775. [Pd(H <sub>2</sub> N(CH <sub>2</sub> ) <sub>2</sub> NH <sub>2</sub> ) <sub>2</sub> ][PdBr <sub>2</sub> (H <sub>2</sub> N(CH <sub>2</sub> ) <sub>2</sub> NH <sub>2</sub> ) <sub>2</sub> ](ReO <sub>4</sub> ) <sub>4</sub> |



|          |         |                                                                                                                                                                                                                                                                                                                                                             |
|----------|---------|-------------------------------------------------------------------------------------------------------------------------------------------------------------------------------------------------------------------------------------------------------------------------------------------------------------------------------------------------------------|
| SETSAO   | 1.718 Å | Kumagai, S.; Takaishi, S.; Gao, M.; Iguchi, H.; Breedlove, B. K.; Yamashita, M. <i>Inorg. Chem.</i> <b>2018</b> , <i>57</i> , 3775. [Pd(H <sub>2</sub> N(CH <sub>2</sub> ) <sub>2</sub> NH <sub>2</sub> ) <sub>2</sub> ][PdI <sub>2</sub> (H <sub>2</sub> N(CH <sub>2</sub> ) <sub>2</sub> NH <sub>2</sub> ) <sub>2</sub> ](ReO <sub>4</sub> ) <sub>4</sub> |
| VUQGAR   | 1.718 Å | Svane, S.; Kuntsche, J.; Steiniger, F.; Eicha, A.; Duelund, L.; McKee, V.; McKenzie, C. J. <i>Supramol. Chem.</i> <b>2015</b> , <i>27</i> , 642. [Cu <sub>2</sub> C <sub>36</sub> H <sub>43</sub> N <sub>7</sub> O <sub>6</sub> ](ReO <sub>4</sub> ) <sub>2</sub> ·2H <sub>2</sub> O                                                                        |
| WURKOM   | 1.718 Å | Andreev, G.; Budantseva, N.; Sokolova, M.; Fedoseev, A. <i>Inorg. Chem.</i> <b>2020</b> , <i>59</i> , 11357. [U(OS(CH <sub>3</sub> ) <sub>2</sub> ) <sub>8</sub> (OReO <sub>3</sub> )](ReO <sub>4</sub> ) <sub>3</sub>                                                                                                                                      |
| YEHFUO   | 1.718 Å | Nakano, Y.; Yamochi, H.; Saito, G.; Kuratsu, M.; Okada, K. <i>J. Phys.: Conf. Ser.</i> <b>2008</b> , <i>132</i> , 12024. (C <sub>18</sub> H <sub>9</sub> NO <sub>3</sub> )ReO <sub>4</sub>                                                                                                                                                                  |
| ZIHNIQ   | 1.718 Å | Inayoshi, T. <i>Synth. Meth.</i> <b>2018</b> , <i>244</i> , 155. (C <sub>10</sub> H <sub>8</sub> OS <sub>6</sub> )ReO <sub>4</sub> ·C <sub>10</sub> H <sub>8</sub> OS <sub>6</sub>                                                                                                                                                                          |
| ZUCQOF   | 1.718 Å | Kataev, E. A.; Pantos, P.; Karnas, E.; Kolesnikov, G. V.; Tananaev, I. G.; Lynch, V. M.; Sessler, J. L. <i>Supramol. Chem.</i> <b>2015</b> , <i>27</i> , 346. (C <sub>64</sub> H <sub>88</sub> N <sub>8</sub> )(ReO <sub>4</sub> ) <sub>2</sub>                                                                                                             |
| 62       | 1.719 Å | Krebs, B.; Hasse, K. <i>Acta Crystallogr., Sect. B</i> <b>1976</b> , <i>32</i> , 1334. KReO <sub>4</sub>                                                                                                                                                                                                                                                    |
| 41049    | 1.719 Å | Baur, W. H.; Kassner, D. <i>J. Solid State Chem.</i> <b>1992</b> , <i>100</i> , 166. Ca(ReO <sub>4</sub> ) <sub>2</sub> ·2H <sub>2</sub> O                                                                                                                                                                                                                  |
| 165619   | 1.719 Å | Watanabe, H.; Imoto, H. <i>Inorg. Chem.</i> <b>1997</b> , <i>36</i> , 4610. (Sb <sub>4</sub> O <sub>5</sub> )(ReO <sub>4</sub> ) <sub>2</sub>                                                                                                                                                                                                               |
| BIHJUY01 | 1.719 Å | Baudron, S. A.; Avarvari, N.; Canadell, E.; Auban-Senzier, P.; Batail, P. <i>Chem. - Eur. J.</i> <b>2004</b> , <i>10</i> , 4498. (C <sub>12</sub> H <sub>12</sub> N <sub>2</sub> O <sub>2</sub> S <sub>6</sub> )ReO <sub>4</sub> ·C <sub>12</sub> H <sub>12</sub> N <sub>2</sub> O <sub>2</sub> S <sub>6</sub>                                              |
| CAJYIX   | 1.719 Å | Cao, R.; McCarthy, B. D.; Lippard, S. J. <i>Inorg. Chem.</i> <b>2011</b> , <i>50</i> , 9499. [Cu <sub>3</sub> ReC <sub>60</sub> H <sub>60</sub> Cl <sub>3</sub> N <sub>10</sub> O <sub>4</sub> ] <sub>n</sub> (PF <sub>6</sub> )(ReO <sub>4</sub> )                                                                                                         |
| COPWOU   | 1.719 Å | Thuery, P. <i>Inorg. Chem.</i> <b>2009</b> , <i>48</i> , 825. [EuRe <sub>2</sub> UC <sub>36</sub> H <sub>50</sub> N <sub>25</sub> O <sub>32</sub> ](ReO <sub>4</sub> ) <sub>2</sub> ·4H <sub>2</sub> O                                                                                                                                                      |
| FAWDAM   | 1.719 Å | Wan, M.; Wang, Y.-N.; Liu, J.-Y.; Tong, L.; Ye, S.-Y.; Li, J.-Y.; Chen, L.-Z. <i>CrystEngComm</i> <b>2022</b> , <i>24</i> , 782. (C <sub>8</sub> H <sub>17</sub> ClN <sub>2</sub> )(ReO <sub>4</sub> ) <sub>2</sub>                                                                                                                                         |
| KUBRAC   | 1.719 Å | Reich, R. M.; Cokoja, M.; Markovits, I. I. E.; Munchmeyer, C. J.; Kaposi, M.; Pothig, A.; Herrmann, W. A.; Kuhn, F. E. <i>Dalton Trans.</i> <b>2015</b> , <i>44</i> , 8669. (C <sub>17</sub> H <sub>17</sub> N <sub>2</sub> )ReO <sub>4</sub>                                                                                                               |
| WIHHEE   | 1.719 Å | Wenhui, H.; Xing, Y.; Ziyu, W.; Zhenhong, W.; Wenjun, R.; Hu, C. <i>Chin. Inorg. Chem.</i> <b>2022</b> , <i>38</i> , 1586. (C <sub>8</sub> H <sub>22</sub> N <sub>4</sub> )(ReO <sub>4</sub> ) <sub>2</sub>                                                                                                                                                 |
| KUCCIW   | 1.719 Å | Reich, R. M.; Cokoja, M.; Markovits, I. I. E.; Munchmeyer, C. J.; Kaposi, M.; Pothig, A.; Herrmann, W. A.; Kuhn, F. E. <i>Dalton Trans.</i> <b>2015</b> , <i>44</i> , 8669. (C <sub>12</sub> H <sub>10</sub> F <sub>2</sub> N <sub>2</sub> )ReO <sub>4</sub>                                                                                                |
| MUJCUS   | 1.719 Å | Nadeem, Q.; Meola, G.; Braband, H.; Bolliger, R.; Blacque, O.; Hernandez-Valdes, D.; Alberto, R. <i>Angew. Chem., Int. Ed.</i> <b>2020</b> , <i>59</i> , 1197. [Re(C <sub>10</sub> H <sub>13</sub> NO) <sub>2</sub> ] <sub>2</sub> ReO <sub>4</sub>                                                                                                         |
| NAPVUZ   | 1.719 Å | Daolio, A.; Pizzi, A.; Terraneo, G.; Frontera, A.; Resnati, G. <i>ChemPhysChem</i> <b>2021</b> , <i>22</i> , 2281. (C <sub>3</sub> H <sub>7</sub> N <sub>6</sub> )ReO <sub>4</sub>                                                                                                                                                                          |
| NETMAB   | 1.719 Å | Seymore, S. B.; Brown, S. N. <i>Inorg. Chem.</i> <b>2006</b> , <i>45</i> , 9540. [Re(N)Cl(P(C <sub>6</sub> H <sub>11</sub> ) <sub>2</sub> (CH <sub>2</sub> ) <sub>2</sub> P(C <sub>6</sub> H <sub>11</sub> ) <sub>2</sub> ) <sub>2</sub> ] <sub>2</sub> ReO <sub>4</sub> ·CH <sub>2</sub> Cl <sub>2</sub> ·1.5C <sub>6</sub> H <sub>6</sub>                 |

|          |         |                                                                                                                                                                                                                                                                                                                                                                                                                     |
|----------|---------|---------------------------------------------------------------------------------------------------------------------------------------------------------------------------------------------------------------------------------------------------------------------------------------------------------------------------------------------------------------------------------------------------------------------|
| PAGPOD   | 1.719 Å | Sutton, A. D.; John, G. H.; Sarsfield, M. J.; Renshaw, J. C.; May, I.; Martin, L. R.; Selvage, A. J.; Collison, D.; Helliwell, M. <i>Inorg. Chem.</i> <b>2004</b> , <i>43</i> , 5480.<br>[UO <sub>2</sub> (OReO <sub>3</sub> )(OP(C <sub>6</sub> H <sub>5</sub> ) <sub>2</sub> (CH <sub>2</sub> ) <sub>2</sub> P(C <sub>6</sub> H <sub>5</sub> ) <sub>2</sub> O) <sub>2</sub> ]ReO <sub>4</sub> ·CH <sub>3</sub> OH |
| PEGTAZ   | 1.719 Å | Morris, D. S.; van Rees, K.; Curcio, M.; Cokoja, M.; Kuhn, F. E.; Duarte, F.; Love, J. B. <i>Cat. Sci. Tech.</i> <b>2017</b> , <i>7</i> , 5644. (C <sub>7</sub> H <sub>10</sub> N)ReO <sub>4</sub>                                                                                                                                                                                                                  |
| PEGTUT   | 1.719 Å | Morris, D. S.; van Rees, K.; Curcio, M.; Cokoja, M.; Kuhn, F. E.; Duarte, F.; Love, J. B. <i>Cat. Sci. Tech.</i> <b>2017</b> , <i>7</i> , 5644. (C <sub>8</sub> H <sub>12</sub> N)ReO <sub>4</sub>                                                                                                                                                                                                                  |
| QOGROU   | 1.719 Å | Martinez-Garcia, H.; Morales, D.; Perez, J.; Puerto, M.; del Rio, I. <i>Chem. – Eur. J.</i> <b>2014</b> , <i>20</i> , 5821.<br>[MoC <sub>20</sub> H <sub>22</sub> N <sub>3</sub> O <sub>2</sub> ]ReO <sub>4</sub> ·CH <sub>2</sub> Cl <sub>2</sub>                                                                                                                                                                  |
| VECKIZ   | 1.719 Å | Amendola, V.; Alberti, G.; Bergamaschi, G.; Biesuz, R.; Boiocchi, M.; Ferrito, S.; Schmidtchen, F.-P. <i>Eur. J. Inorg. Chem.</i> <b>2012</b> , 3410. (C <sub>36</sub> H <sub>60</sub> N <sub>8</sub> )ReO <sub>4</sub> (CF <sub>3</sub> SO <sub>3</sub> ) <sub>5</sub> ·8H <sub>2</sub> O                                                                                                                          |
| 1395     | 1.720 Å | Kruger, G. J.; Reynhardt, E. C. <i>Acta Crystallogr., Sect. B</i> <b>1978</b> , <i>34</i> , 259. NH <sub>4</sub> ReO <sub>4</sub>                                                                                                                                                                                                                                                                                   |
| 411646   | 1.720 Å | Abakumov, A. M.; Rozova, M. G.; Shpanchenko, R. V.; Mironov, A. V.; Antipov, E. V.; Bramnik, K. G. <i>Solid State Sci.</i> <b>2001</b> , <i>3</i> , 581. LiReO <sub>4</sub> ·H <sub>2</sub> O                                                                                                                                                                                                                       |
| 421686   | 1.720 Å | Baidina, I. A.; Filatov, E. Y.; Makotchenko, E. V.; Smolentsev, A. I. <i>J. Struct. Chem.</i> <b>2012</b> , <i>53</i> , 112.<br>[Co(NH <sub>3</sub> ) <sub>6</sub> ](ReO <sub>4</sub> ) <sub>3</sub> ·2H <sub>2</sub> O                                                                                                                                                                                             |
| AZUKOY   | 1.720 Å | Mondal, A.; Rashid, A.; Ghosh, P. <i>J. Organometal. Chem.</i> <b>2021</b> , 952, 122027.<br>[Ru(N <sub>2</sub> C <sub>12</sub> H <sub>8</sub> ) <sub>2</sub> (C <sub>14</sub> H <sub>14</sub> F <sub>5</sub> IN <sub>4</sub> )](ReO <sub>4</sub> ) <sub>2</sub> ·2CH <sub>3</sub> CN                                                                                                                               |
| INUXEU   | 1.720 Å | Miyasaka, H.; Clerac, R.; Mizushima, K.; Sugiura, K.; Yamashita, M.; Wernsdorfer, W.; Coulon, C. <i>Inorg. Chem.</i> <b>2003</b> , <i>42</i> , 8203. [Mn <sub>2</sub> NiC <sub>62</sub> H <sub>64</sub> N <sub>10</sub> O](ReO <sub>4</sub> ) <sub>2</sub>                                                                                                                                                          |
| LOLHIG04 | 1.720 Å | Gao J.-X. CCDC deposition number 1938432, <b>2019</b> . (C <sub>7</sub> H <sub>13</sub> FN)ReO <sub>4</sub>                                                                                                                                                                                                                                                                                                         |
| MAJPET   | 1.720 Å | Holynska, M.; Lis, T. <i>Acta Crystallogr., Sect. C</i> <b>2004</b> , <i>60</i> , m648. (PI(C <sub>6</sub> H <sub>5</sub> ) <sub>3</sub> )ReO <sub>4</sub>                                                                                                                                                                                                                                                          |
| NELBEL   | 1.720 Å | Murmann, R. K.; Barnes, C. CCDC deposition number 101193, <b>1998</b> . (C <sub>12</sub> H <sub>28</sub> N <sub>4</sub> O <sub>2</sub> )(ReO <sub>4</sub> ) <sub>2</sub>                                                                                                                                                                                                                                            |
| NIVYIB   | 1.720 Å | Ghosh, S.; Roehm, B.; Begum, R. A.; Kut, J.; Hossain, M. A.; Day, V. W.; Bowman-James, K. <i>Inorg. Chem.</i> <b>2007</b> , <i>46</i> , 9519. (C <sub>24</sub> H <sub>34</sub> N <sub>8</sub> O <sub>4</sub> )(ReO <sub>4</sub> ) <sub>2</sub> ·3H <sub>2</sub> O                                                                                                                                                   |
| REVREQ   | 1.720 Å | Thuery, P. CCDC deposition number 631072, <b>2006</b> . (C <sub>18</sub> H <sub>31</sub> N <sub>2</sub> O <sub>8</sub> )ReO <sub>4</sub>                                                                                                                                                                                                                                                                            |
| 112618   | 1.721 Å | Charkin, D. O.; Siidra, O. I.; Plokhikh, I. V.; Borisov, A. S.; Markovski, M. R. <i>Solid State Sci.</i> <b>2021</b> , <i>114</i> , 106576. Ba <sub>2</sub> ReO <sub>4</sub> Cl <sub>2</sub>                                                                                                                                                                                                                        |
| AHIRAL   | 1.721 Å | Thuery, P. <i>Inorg. Chem.</i> <b>2009</b> , <i>48</i> , 4497. [Pr <sub>2</sub> ReC <sub>36</sub> H <sub>46</sub> N <sub>27</sub> O <sub>30</sub> ] <sub>n</sub> (ReO <sub>4</sub> ) <sub>2</sub> ·2H <sub>2</sub> O                                                                                                                                                                                                |
| ALODAI   | 1.721 Å | Song, X.; Lim, M. H.; Mohamed, D. K. B. Wong, S. M.; Zhao, J.; Andy Hor, T. S. <i>J. Organometal. Chem.</i> <b>2016</b> , <i>814</i> , 1. (C <sub>9</sub> H <sub>16</sub> N <sub>2</sub> O)(ReO <sub>4</sub> ) <sub>2</sub>                                                                                                                                                                                         |
| COXPEL   | 1.721 Å | Thuery, P. <i>Cryst. Growth Des.</i> <b>2009</b> , <i>9</i> , 1208. [UO <sub>2</sub> (C <sub>30</sub> H <sub>30</sub> N <sub>20</sub> O <sub>10</sub> )](ReO <sub>4</sub> ) <sub>2</sub> ·2H <sub>2</sub> O                                                                                                                                                                                                         |

|          |         |                                                                                                                                                                                                                                                                                                                                                                |
|----------|---------|----------------------------------------------------------------------------------------------------------------------------------------------------------------------------------------------------------------------------------------------------------------------------------------------------------------------------------------------------------------|
| CUDYAB   | 1.721 Å | Kikuchi, K.; Yakushi, K.; Kuroda, H.; Kobayashi, K.; Honda, M.; Katayama, C.; Tanaka, J. <i>Chem. Lett.</i> <b>1984</b> , 1885. (C <sub>11</sub> H <sub>12</sub> Se <sub>4</sub> )ReO <sub>4</sub> ·C <sub>11</sub> H <sub>12</sub> Se <sub>4</sub>                                                                                                            |
| GUHCEU   | 1.721 Å | Mroweh, N.; Pop, F.; Meziere, C.; Allain, M.; Auban-Senzier, P.; Vanthuyne, N.; Alemany, P. Canadell, E.; Avarvari, N. <i>Cryst. Growth Des.</i> <b>2020</b> , <i>20</i> , 2516. (C <sub>12</sub> H <sub>12</sub> N <sub>2</sub> O <sub>2</sub> S <sub>6</sub> )ReO <sub>4</sub> ·C <sub>12</sub> H <sub>12</sub> N <sub>2</sub> O <sub>2</sub> S <sub>6</sub> |
| PEGSUS   | 1.721 Å | Morris, D. S.; van Rees, K.; Curcio, M.; Cokoja, M.; Kuhn, F. E.; Duarte, F.; Love, J. B. <i>Cat. Sci. Tech.</i> <b>2017</b> , <i>7</i> , 5644. (H <sub>3</sub> NC <sub>6</sub> H <sub>13</sub> )ReO <sub>4</sub>                                                                                                                                              |
| PIDTIF   | 1.721 Å | Herrmann, W. A.; Roesky, P. W.; Kuhn, F. E.; Scherer, W.; Kleine, M. <i>Angew. Chem., Int. Ed.</i> <b>1993</b> , <i>32</i> , 1714. [Re(O) <sub>3</sub> (N <sub>3</sub> C <sub>6</sub> H <sub>15</sub> )]ReO <sub>4</sub>                                                                                                                                       |
| RIGYAK   | 1.721 Å | Bykova, E. A.; Khranenko, S. P.; Gromilov, S. A. <i>Russ. J. Struct. Chem.</i> <b>2018</b> , <i>59</i> , 172. [NiN <sub>4</sub> C <sub>16</sub> H <sub>32</sub> ](ReO <sub>4</sub> ) <sub>2</sub>                                                                                                                                                              |
| WOJFIK   | 1.721 Å | Chantler, J.; Fanwick, P. E.; Walton, R. A. <i>J. Organometal. Chem.</i> <b>2000</b> , <i>604</i> , 219. [Re <sub>2</sub> (O)Cl <sub>3</sub> (NCCH <sub>3</sub> ) <sub>2</sub> ((C <sub>6</sub> H <sub>5</sub> ) <sub>2</sub> PCH <sub>2</sub> P(C <sub>6</sub> H <sub>5</sub> ) <sub>2</sub> )]ReO <sub>4</sub> ·CH <sub>3</sub> CN                           |
| 73297    | 1.722 Å | Rögner, P. Macicek, J.; Angelova, O.; Petrova, R.; Range, K. J. <i>Z. Naturforsch., Sect. B</i> <b>1993</b> , <i>48</i> , 233. RbReO <sub>4</sub>                                                                                                                                                                                                              |
| 79119    | 1.722 Å | Macicek, J.; Angelova, O.; Petrova, R. <i>Z. Kristallogr.</i> <b>1995</b> , <i>210</i> , 319. Ca(ReO <sub>4</sub> ) <sub>2</sub> ·OC(NH <sub>2</sub> ) <sub>2</sub> ·H <sub>2</sub> O                                                                                                                                                                          |
| IJUQUB   | 1.722 Å | Khranenko, S. P.; Kuratieva, N. V.; Gromilov, S. A. <i>Russ. J. Struct. Chem.</i> <b>2015</b> , <i>56</i> , 367. [Pt(H <sub>2</sub> N(CH <sub>2</sub> ) <sub>2</sub> NH <sub>2</sub> ) <sub>2</sub> ](ReO <sub>4</sub> ) <sub>2</sub>                                                                                                                          |
| KUBREG   | 1.722 Å | Reich, R. M.; Cokoja, M.; Markovits, I. I. E.; Munchmeyer, C. J.; Kaposi, M.; Pothig, A.; Herrmann, W. A.; Kuhn, F. E. <i>Dalton Trans.</i> <b>2015</b> , <i>44</i> , 8669. (C <sub>17</sub> H <sub>17</sub> F <sub>5</sub> N <sub>2</sub> )ReO <sub>4</sub>                                                                                                   |
| KUBRIK   | 1.722 Å | Reich, R. M.; Cokoja, M.; Markovits, I. I. E.; Munchmeyer, C. J.; Kaposi, M.; Pothig, A.; Herrmann, W. A.; Kuhn, F. E. <i>Dalton Trans.</i> <b>2015</b> , <i>44</i> , 8669. (C <sub>17</sub> H <sub>7</sub> F <sub>10</sub> N <sub>2</sub> )ReO <sub>4</sub>                                                                                                   |
| KUCBOB   | 1.722 Å | Reich, R. M.; Cokoja, M.; Markovits, I. I. E.; Munchmeyer, C. J.; Kaposi, M.; Pothig, A.; Herrmann, W. A.; Kuhn, F. E. <i>Dalton Trans.</i> <b>2015</b> , <i>44</i> , 8669. (C <sub>12</sub> H <sub>15</sub> N <sub>2</sub> )ReO <sub>4</sub>                                                                                                                  |
| KUCCAO   | 1.722 Å | Reich, R. M.; Cokoja, M.; Markovits, I. I. E.; Munchmeyer, C. J.; Kaposi, M.; Pothig, A.; Herrmann, W. A.; Kuhn, F. E. <i>Dalton Trans.</i> <b>2015</b> , <i>44</i> , 8669. (C <sub>14</sub> H <sub>19</sub> N <sub>2</sub> )ReO <sub>4</sub>                                                                                                                  |
| SAQHOJ   | 1.722 Å | Vasil'chenko, D. B.; Filatov, E. Y.; Baidina, I. A.; Plyusnin, P. E.; Korenev, S. V. <i>Koord. Khim.</i> <b>2010</b> , <i>36</i> , 347. [RhCl <sub>2</sub> (NC <sub>5</sub> H <sub>4</sub> (CH <sub>3</sub> )) <sub>4</sub> ](ReO <sub>4</sub> )·(CH <sub>3</sub> ) <sub>2</sub> NCHO                                                                          |
| SAQHOJ01 | 1.722 Å | Marsch, R. E. <i>Acta Crystallogr., Sect. C</i> <b>2014</b> , <i>70</i> , 834. [RhCl <sub>2</sub> (NC <sub>5</sub> H <sub>4</sub> (CH <sub>3</sub> )) <sub>4</sub> ](ReO <sub>4</sub> )·(CH <sub>3</sub> ) <sub>2</sub> NCHO                                                                                                                                   |
| SETSES   | 1.722 Å | Kumagai, S.; Takaishi, S.; Gao, M.; Iguchi, H.; Breedlove, B. K.; Yamashita, M. <i>Inorg. Chem.</i> <b>2018</b> , <i>57</i> , 3775. [Pd(H <sub>2</sub> N(CH <sub>2</sub> ) <sub>2</sub> NH <sub>2</sub> ) <sub>2</sub> ][PdCl <sub>2</sub> (H <sub>2</sub> N(CH <sub>2</sub> ) <sub>2</sub> NH <sub>2</sub> ) <sub>2</sub> ](ReO <sub>4</sub> ) <sub>4</sub>   |
| TUTKIF   | 1.722 Å | Fu, D.-W.; Cai, H.-L.; Li, S.-H.; Ye, Q.; Zhou, L.; Zhang, W.; Zhang, Y.; Deng, F.; Xiong, R.-G. <i>Phys. Rev. Lett.</i> <b>2013</b> , <i>110</i> , 257601. ( <i>p</i> -H <sub>3</sub> NC <sub>6</sub> H <sub>4</sub> OCH <sub>3</sub> )ReO <sub>4</sub> ·C <sub>12</sub> H <sub>24</sub> O <sub>6</sub>                                                       |

|        |         |                                                                                                                                                                                                                                                                                                                                                                                 |
|--------|---------|---------------------------------------------------------------------------------------------------------------------------------------------------------------------------------------------------------------------------------------------------------------------------------------------------------------------------------------------------------------------------------|
| UMEXAL | 1.722 Å | Gibson, D. H.; Mashuta, M. S.; Yin, X. <i>Acta Crystallogr., Sect. E</i> <b>2003</b> , <i>59</i> , m911. [OH(Re(CO) <sub>3</sub> (N <sub>2</sub> C <sub>12</sub> H <sub>12</sub> ) <sub>2</sub> )]ReO <sub>4</sub> ·(CH <sub>3</sub> ) <sub>2</sub> CO                                                                                                                          |
| ZUYKIP | 1.722 Å | Riel, A. M. S.; Decato, D. A.; Berryman, O. B. <i>Cryst. Growth Des.</i> <b>2016</b> , <i>16</i> , 974. (C <sub>22</sub> H <sub>18</sub> N <sub>2</sub> )(ReO <sub>4</sub> ) <sub>2</sub> ·2CH <sub>2</sub> Cl <sub>2</sub>                                                                                                                                                     |
| 1921   | 1.723 Å | Lock, C. J. L.; Turner, G. <i>Acta Crystallogr., Sect. B</i> <b>1975</b> , <i>31</i> , 1764. KReO <sub>4</sub>                                                                                                                                                                                                                                                                  |
| 101232 | 1.723 Å | Louis–Jean, J.; Balasekaran, S. M.; Hagenbach, A.; Poineau, F. <i>Acta Crystallogr., Sect. E</i> <b>2019</b> , <i>75</i> , 1158. [Co(NH <sub>3</sub> ) <sub>6</sub> ] <sub>n</sub> ReO <sub>4</sub> (ReF <sub>6</sub> ) <sub>4</sub> ·6H <sub>2</sub> O                                                                                                                         |
| DAQVOH | 1.723 Å | Mosch-Zanetti, N. C.; Sachse, A.; Pfoh, R.; Vidovic, D.; Magull, J. <i>Dalton Trans.</i> <b>2005</b> , 2124. (C <sub>11</sub> H <sub>21</sub> N <sub>2</sub> )ReO <sub>4</sub>                                                                                                                                                                                                  |
| IGUWUD | 1.723 Å | Peters, L.; Hubner, E.; Haas, T.; Heinemann, F. W.; Burzlaff, N. <i>J. Organometal. Chem.</i> <b>2009</b> , <i>694</i> , 2319. (C <sub>13</sub> H <sub>19</sub> N <sub>4</sub> O <sub>2</sub> )ReO <sub>4</sub>                                                                                                                                                                 |
| KATHIW | 1.723 Å | Herrmann, W. A.; Kuchler, J. G.; Weichselbaumer, G.; Herdtweck, E.; Kiprof, P. <i>J. Organometal. Chem.</i> <b>1989</b> , <i>372</i> , 351. [Na(O <sub>5</sub> C <sub>14</sub> H <sub>20</sub> )]ReO <sub>4</sub>                                                                                                                                                               |
| MAPRUT | 1.723 Å | Khranenko, S. P.; Bykova, E. A.; Zadesenets, A. V.; Gromilov, S. A. <i>J. Struct. Chem.</i> <b>2017</b> , <i>58</i> , 90. [Zn(H <sub>2</sub> N(CH <sub>2</sub> ) <sub>2</sub> NH <sub>2</sub> ) <sub>3</sub> ](ReO <sub>4</sub> ) <sub>2</sub>                                                                                                                                  |
| PIDTOL | 1.723 Å | Herrmann, W. A.; Roesky, P. W.; Kuhn, F. E.; Scherer, W.; Kleine, M. <i>Angew. Chem., Int. Ed.</i> <b>1993</b> , <i>32</i> , 1714. [Re(O) <sub>3</sub> (N <sub>3</sub> C <sub>9</sub> H <sub>21</sub> )]ReO <sub>4</sub>                                                                                                                                                        |
| QIVTIB | 1.723 Å | Zhu, L.; Sheng, D.; Xu, C.; Dai, X.; Silver, M. A.; Li, J.; Li, P.; Wang, Y.; Wang, Y.; Chen, L.; Xiao, C.; Chen, J.; Zhou, R.; Zhang, C.; Farha, O. K.; Chai, Z.; Albrecht-Schmitt, T. E.; Wang, S. <i>J. Am. Chem. Soc.</i> <b>2017</b> , <i>139</i> , 14873. [Ni <sub>2</sub> C <sub>76</sub> H <sub>56</sub> N <sub>16</sub> O <sub>4</sub> ] <sub>n</sub> ReO <sub>4</sub> |
| 5917   | 1.724 Å | Chay, C.; Avdeev, M.; Brand, H. E. A.; Injac, S.; Whittle, T. A.; Kennedy, B. J. <i>Dalton Trans.</i> <b>2019</b> , <i>48</i> , 17524. KReO <sub>4</sub>                                                                                                                                                                                                                        |
| 39875  | 1.724 Å | Khrustalev, V. N.; Varfolomeev, M. B.; Shamrai, N. B.; Lindeman, S. V.; Struchkov, Y. T. <i>Russ. J. Inorg. Chem.</i> <b>1995</b> , <i>40</i> , 208. LiReO <sub>4</sub> ·1.5H <sub>2</sub> O                                                                                                                                                                                    |
| 158875 | 1.724 Å | Korolkov, I. V.; Zadesenets, A. V.; Gromilov, S. A.; Yusenko, K. V.; Baldina, I. A.; Korenev, S. V. <i>Russ. J. Struct. Chem.</i> <b>2006</b> , <i>47</i> , 503. [Pt(NH <sub>3</sub> ) <sub>4</sub> ](ReO <sub>4</sub> ) <sub>2</sub>                                                                                                                                           |
| ANABUO | 1.724 Å | Prakasam, T.; Bilbeisi, R. A.; Lusi, M.; Olsen, J.-C.; Platas-Iglesias, C.; Trabolssi, A. <i>Chem. Commun.</i> <b>2016</b> , <i>52</i> , 7398. [Cd <sub>3</sub> C <sub>105</sub> H <sub>81</sub> F <sub>9</sub> N <sub>15</sub> O <sub>12</sub> ](ReO <sub>4</sub> ) <sub>3</sub>                                                                                               |
| BEMHIL | 1.724 Å | Bera, J. K.; Bacsa, J.; Smucker, B. W.; Dunbar, K. R. <i>Eur. J. Inorg. Chem.</i> <b>2004</b> , 368. [AgRe <sub>4</sub> C <sub>62</sub> H <sub>52</sub> N <sub>2</sub> O <sub>12</sub> P <sub>4</sub> ] <sub>n</sub> ReO <sub>4</sub> ·1.5C <sub>2</sub> H <sub>4</sub> Cl <sub>2</sub> ·2CH <sub>3</sub> OH                                                                    |
| FABFOG | 1.724 Å | Afanasieva, V. A.; Glinskaya, L. A.; Piryazev, D. A.; Gromilov, S. A. <i>Russ J. Struct Chem.</i> <b>2015</b> , <i>56</i> , 836. [Au(N <sub>4</sub> C <sub>14</sub> H <sub>22</sub> )]ReO <sub>4</sub>                                                                                                                                                                          |

|          |         |                                                                                                                                                                                                                                                                                                                   |
|----------|---------|-------------------------------------------------------------------------------------------------------------------------------------------------------------------------------------------------------------------------------------------------------------------------------------------------------------------|
| HUTSOF   | 1.724 Å | Feng, Y.; Aponte, J.; Houseworth, P. J.; Boyle, P. D.; Ison, E. A. <i>Inorg. Chem.</i> <b>2009</b> , <i>48</i> , 11058. (C <sub>17</sub> H <sub>14</sub> F <sub>10</sub> N <sub>3</sub> )ReO <sub>4</sub>                                                                                                         |
| KAZQEH   | 1.724 Å | Perez-Benitez, A.; Rovira, C.; Veciana, J.; Vidal-Gancedo, J.; Laukhin, V. N.; Zorina, L.V.; Khasanov, S. S.; Narymbetov, B. Z.; Shibaeva, R. P. M. <i>Synth. Met.</i> <b>1999</b> , <i>102</i> , 1707. (C <sub>10</sub> H <sub>8</sub> S <sub>6</sub> )ReO <sub>4</sub>                                          |
| KAZQEH01 | 1.724 Å | Khasanov, S. S.; Perez-Benitez, A.; Narymbetov, B. Z.; Zorina, L.V.; Shibaeva, R. P.; Singleton, J.; Klehe, A.-K.; Laukhin, V. N.; Vidal-Gancedo, J.; Veciana, J.; Canadell, E.; Rovira, C. <i>J. Mater Chem.</i> <b>2002</b> , <i>12</i> , 432. (C <sub>10</sub> H <sub>8</sub> S <sub>6</sub> )ReO <sub>4</sub> |
| KUCCES   | 1.724 Å | Reich, R. M.; Cokoja, M.; Markovits, I. I. E.; Munchmeyer, C. J.; Kaposi, M.; Pothig, A.; Herrmann, W. A.; Kuhn, F. E. <i>Dalton Trans.</i> <b>2015</b> , <i>44</i> , 8669. (C <sub>11</sub> H <sub>8</sub> F <sub>5</sub> N <sub>2</sub> )ReO <sub>4</sub>                                                       |
| PEGVAB   | 1.724 Å | Morris, D. S.; van Rees, K.; Curcio, M.; Cokoja, M.; Kuhn, F. E.; Duarte, F.; Love, J. B. <i>Cat. Sci. Tech.</i> <b>2017</b> , <i>7</i> , 5644. (C <sub>5</sub> H <sub>5</sub> ClN)ReO <sub>4</sub>                                                                                                               |
| RAFKUF   | 1.724 Å | Andersen, P.; Glerup, J.; Gumm, A.; Hansen, S. K.; Magnussen, M. <i>Dalton Trans.</i> <b>2004</b> , 2929. [Co <sub>2</sub> C <sub>12</sub> H <sub>36</sub> N <sub>9</sub> ](ReO <sub>4</sub> ) <sub>3</sub> ·H <sub>2</sub> O                                                                                     |
| SAYWOF   | 1.724 Å | Kochel, A. <i>Acta Crystallogr., Sect. E</i> <b>2006</b> , <i>62</i> , m37. [C <sub>15</sub> H <sub>12</sub> N <sub>3</sub> ]ReO <sub>4</sub>                                                                                                                                                                     |
| XAQDAW   | 1.724 Å | Sharutin, V. V.; Senchurin, V. S.; Sharutina, O. K.; Pakusina, A. P.; Fastovets, O. A. <i>Russ. J. Inorg. Chem.</i> <b>2011</b> , <i>56</i> , 599. [Sb( <i>p</i> -C <sub>6</sub> H <sub>4</sub> CH <sub>3</sub> ) <sub>4</sub> ](ReO <sub>4</sub> )                                                               |
| XIBDAO   | 1.724 Å | Ion, L.; Morales, D.; Nieto, S.; Perez, J.; Riera, L.; Riera, V.; Miguel, D.; Kowenicki, R. A.; McPartlin, M. <i>Inorg. Chem.</i> <b>2007</b> , <i>46</i> , 2846. [MoC <sub>17</sub> H <sub>22</sub> N <sub>5</sub> O <sub>2</sub> ]ReO <sub>4</sub>                                                              |
| 35038    | 1.725 Å | Conrad, M.; Schleid, T. <i>J. Alloys Compds.</i> <b>2021</b> , <i>868</i> , 159097. BaReO <sub>4</sub> Br                                                                                                                                                                                                         |
| 39800    | 1.725 Å | Khrustalev, V. N.; Varfolomeev, M. B.; Shamrai, N. B.; Pisarevskii, A. P.; Struchkov, Y. T. <i>Koord. Khim.</i> <b>1994</b> , <i>20</i> , 362. Ba(ReO <sub>4</sub> ) <sub>2</sub> ·4H <sub>2</sub> O                                                                                                              |
| AROGEU   | 1.725 Å | Braband, H.; Imstepf, S.; Felber, M.; Spingler, B.; Alberto, R. <i>Inorg. Chem.</i> <b>2010</b> , <i>49</i> , 1283. [ReO <sub>3</sub> (C <sub>6</sub> H <sub>15</sub> N <sub>3</sub> )]ReO <sub>4</sub>                                                                                                           |
| HOKZAI   | 1.725 Å | Bryan, J. C.; Sachleben, R. A.; Hay, B. P. <i>Inorg. Chim. Acta</i> <b>1999</b> , <i>290</i> , 86. [NaO <sub>8</sub> C <sub>32</sub> H <sub>32</sub> ]ReO <sub>4</sub>                                                                                                                                            |
| IFIVEY   | 1.725 Å | Kawamoto, T.; Ashizawa, M.; Mori, T.; Yamaura, J.-I.; Kato, R.; Misaki, Y.; Tanaka, K. <i>Bull. Chem. Soc. Jpn.</i> <b>2002</b> , <i>75</i> , 435. (C <sub>18</sub> H <sub>16</sub> S <sub>12</sub> )ReO <sub>4</sub>                                                                                             |
| KEWNOT   | 1.725 Å | Ghosh, R.; Ghosh, T. K.; Pramanik, S.; Islam, A. S. M.; Ghosh, P. <i>ACS Appl. Mater. Interfaces</i> <b>2023</b> , <i>15</i> , 25184. (C <sub>30</sub> H <sub>42</sub> N <sub>8</sub> )(ReO <sub>4</sub> ) <sub>4</sub>                                                                                           |
| LANHOB   | 1.725 Å | Nadeem, Q.; Battistin, F.; Blacque, O.; Alberto, R. <i>Chem.-Eur. J.</i> <b>2022</b> , <i>28</i> , e202103566. [Re(C <sub>14</sub> H <sub>23</sub> N <sub>2</sub> O) <sub>2</sub> ](ReO <sub>4</sub> ) <sub>3</sub> ·3CH <sub>3</sub> CN                                                                          |
| LEGBOS   | 1.725 Å | Shirahata, T.; Kohno, S.; Furuta, K.; Katayama, S.; Suzuki, K.; Kawamoto, T.; Mori, T.; Misaki, Y. <i>Inorg. Chem.</i> <b>2022</b> , <i>61</i> , 7754. (C <sub>14</sub> H <sub>12</sub> S <sub>8</sub> )ReO <sub>4</sub> ·C <sub>14</sub> H <sub>12</sub> S <sub>8</sub>                                          |

|        |         |                                                                                                                                                                                                                                                                                                                                                                |
|--------|---------|----------------------------------------------------------------------------------------------------------------------------------------------------------------------------------------------------------------------------------------------------------------------------------------------------------------------------------------------------------------|
| KUCBIV | 1.725 Å | Reich, R. M.; Cokoja, M.; Markovits, I. I. E.; Munchmeyer, C. J.; Kaposi, M.; Pothig, A.; Herrmann, W. A.; Kuhn, F. E. <i>Dalton Trans.</i> <b>2015</b> , 44, 8669. (C <sub>11</sub> H <sub>13</sub> N <sub>2</sub> )ReO <sub>4</sub>                                                                                                                          |
| UHOBUP | 1.725 Å | Brooks, A. C.; Day, P.; Dias, S. I. G.; Rabaca, S.; Santos, I. C.; Henriques, R. T.; Wallis, J. D.; Almeida, M. <i>Eur. J. Inorg. Chem.</i> <b>2009</b> , 3084. (C <sub>20</sub> H <sub>13</sub> N <sub>2</sub> O <sub>8</sub> )(ReO <sub>4</sub> ) <sub>2</sub> ·0.5CH <sub>2</sub> Cl <sub>2</sub>                                                           |
| 35037  | 1.726 Å | Conrad, M.; Schleid, T. <i>J. Alloys Compds.</i> <b>2021</b> , 868, 159097. BaReO <sub>4</sub> Cl                                                                                                                                                                                                                                                              |
| 79649  | 1.726 Å | Harrison, W. T. A.; McManus, A. V. P.; Kaminsky, M. P.; Cheetham, A. K. <i>Chem. Mater.</i> <b>1993</b> , 5, 1631. SbOReO <sub>4</sub> ·2H <sub>2</sub> O                                                                                                                                                                                                      |
| 141006 | 1.726 Å | Reynolds, E. M.; Yu, M.; Thorogood, G. J.; Brand, H. E. A.; Poineau, F.; Kennedy, B. J. <i>J. Solid State Chem.</i> <b>2019</b> , 274, 64. NH <sub>4</sub> ReO <sub>4</sub>                                                                                                                                                                                    |
| 187075 | 1.726 Å | Khramenko, S. P.; Bykova, E. A.; Alexeyev, A. V.; Tyutyunnik, A. P.; Gromilov, S. A. <i>J. Struct. Chem.</i> <b>2012</b> , 53, 521. [Rh(NH <sub>3</sub> ) <sub>6</sub> ](ReO <sub>4</sub> ) <sub>3</sub> ·2H <sub>2</sub> O                                                                                                                                    |
| AHIQEO | 1.726 Å | Thuery, P. <i>Inorg. Chem.</i> <b>2009</b> , 48, 4497. [CeKReC <sub>38</sub> H <sub>38</sub> N <sub>21</sub> O <sub>21</sub> ] <sub>n</sub> (ReO <sub>4</sub> ) <sub>2</sub> ·C <sub>48</sub> H <sub>48</sub> N <sub>32</sub> O <sub>16</sub> ·2H <sub>2</sub> O                                                                                               |
| DAGWIV | 1.726 Å | Belaj, F.; Schachner, J. A.; Mosch-Zanetti, N. C. CCDC deposition number 2113432, <b>2021</b> . [Re <sub>2</sub> C <sub>48</sub> H <sub>32</sub> Cl <sub>2</sub> N <sub>8</sub> O](ReO <sub>4</sub> ) <sub>2</sub> ·2CH <sub>3</sub> CN·1.33H <sub>2</sub> O                                                                                                   |
| GEQJEV | 1.726 Å | Novikov, A. P.; German, K. E.; Safonov, A. V.; Grigoriev, M. S. <i>Chem. Sel.</i> <b>2022</b> , 7, e202202814. (C <sub>5</sub> H <sub>7</sub> N <sub>5</sub> O) <sub>2</sub> (ReO <sub>4</sub> ) <sub>2</sub>                                                                                                                                                  |
| BOCZOM | 1.726 Å | Kazakova, A. A.; Kubasov, A. S.; Chizhov, A. O.; Novikov, A. P.; Volkov, M. A.; Borisov, A. V.; Nenajdenko, V. G.; Dukhnovsky, E. A.; Bely, A. E.; Grishina, M. M.; Kritchenkov, A. S.; Gomila, R. M.; Frontera, A.; Tskhovrebov, A. G. <i>Inorg. Chim. Acta</i> <b>2024</b> , 563, 121929. (C <sub>11</sub> H <sub>8</sub> N <sub>3</sub> Se)ReO <sub>4</sub> |
| JILGAM | 1.726 Å | McGhee, E. M.; Godfrey, M. R.; Hoffman, B. M.; Ibers, J. A. <i>Inorg. Chem.</i> <b>1991</b> , 30, 803. [Cu(N <sub>4</sub> C <sub>24</sub> H <sub>20</sub> )](ReO <sub>4</sub> ) <sub>2</sub>                                                                                                                                                                   |
| YEJYOF | 1.726 Å | Artemjev, A. A.; Novikov, A. P.; Burkin, G. M.; Saponov, A. A.; Kubasov, A. S.; Nenajdenko, V. G.; Khrustalev, V. N.; Borisov, A. V.; Kirichuk, A. A.; Kritchenkov, A. S.; Gomila, R. M.; Frontera, A.; Tskhovrebov, A. G. <i>Int. J. Mol. Sci.</i> <b>2022</b> , 23, 6372. (C <sub>7</sub> H <sub>6</sub> ClN <sub>2</sub> Se)ReO <sub>4</sub>                |
| PEGTON | 1.726 Å | Morris, D. S.; van Rees, K.; Curcio, M.; Cokoja, M.; Kuhn, F. E.; Duarte, F.; Love, J. B. <i>Cat. Sci. Tech.</i> <b>2017</b> , 7, 5644. (C <sub>5</sub> H <sub>5</sub> BrN)ReO <sub>4</sub>                                                                                                                                                                    |
| RAHGUE | 1.726 Å | Makotchenko, E. V.; Baidina, I. A. <i>Russ. J. Struct. Chem.</i> <b>2011</b> , 52, 572. [Au(H <sub>2</sub> N(CH <sub>2</sub> ) <sub>2</sub> NH <sub>2</sub> ) <sub>2</sub> ] <sub>2</sub> Cl(ReO <sub>4</sub> ) <sub>2</sub>                                                                                                                                   |
| XEMSEP | 1.726 Å | Baidina, I. A.; Filatov, E. Y.; Makotchenko, E. V.; Smolentsev, A. I. <i>Russ. J. Struct. Chem.</i> <b>2012</b> , 53, 117. [Co(H <sub>2</sub> N(CH <sub>2</sub> ) <sub>2</sub> NH <sub>2</sub> ) <sub>3</sub> ](ReO <sub>4</sub> ) <sub>3</sub>                                                                                                                |
| ZUYKAH | 1.726 Å | Riel, A. M. S.; Decato, D. A.; Berryman, O. B. <i>Cryst. Growth Des.</i> <b>2016</b> , 16, 974. (C <sub>21</sub> H <sub>16</sub> N <sub>2</sub> )ReO <sub>4</sub>                                                                                                                                                                                              |
| 5918   | 1.727 Å | Chay, C.; Avdeev, M.; Brand, H. E. A.; Injac, S.; Whittle, T. A.; Kennedy, B. J. <i>Dalton Trans.</i> <b>2019</b> , 48, 17524. TlReO <sub>4</sub>                                                                                                                                                                                                              |



|          |         |                                                                                                                                                                                                                                                                                                                    |
|----------|---------|--------------------------------------------------------------------------------------------------------------------------------------------------------------------------------------------------------------------------------------------------------------------------------------------------------------------|
| 240895   | 1.727 Å | Grigoriev, M. S.; German, K. E.; Maruk, A. Y. <i>Acta Crystallogr., Sect. E</i> <b>2007</b> , <i>63</i> , m2061. (C(NH <sub>2</sub> ) <sub>3</sub> )ReO <sub>4</sub>                                                                                                                                               |
| AHIREP   | 1.727 Å | Thuery, P. <i>Inorg. Chem.</i> <b>2009</b> , <i>48</i> , 4497. [Ce <sub>3</sub> Re <sub>2</sub> C <sub>72</sub> H <sub>96</sub> N <sub>48</sub> O <sub>44</sub> ] <sub>n</sub> (ReO <sub>4</sub> ) <sub>7</sub> ·8H <sub>2</sub> O                                                                                 |
| GEQJAR   | 1.727 Å | Novikov, A. P.; German, K. E.; Safonov, A. V.; Grigoriev, M. S. <i>Chem. Sel.</i> <b>2022</b> , <i>7</i> , e202202814. (C <sub>5</sub> H <sub>6</sub> N <sub>5</sub> O)ReO <sub>4</sub>                                                                                                                            |
| DUBXII   | 1.727 Å | Holynska, M.; Lis, T. <i>Acta Crystallogr., Sect. E</i> <b>2009</b> , <i>65</i> , m998. (C(CH <sub>2</sub> OH) <sub>3</sub> )(NH <sub>3</sub> ))ReO <sub>4</sub>                                                                                                                                                   |
| ONELUR   | 1.727 Å | Li, C.-P.; Zhou, H.; Wang, J.-J.; Liu, B.-L.; Wang, S.; Yang, X.; Wang, Z.-L.; Liu, C.-S.; Du, M.; Zhou, W. <i>ACS Appl. Mater. Interfaces</i> <b>2019</b> , <i>11</i> , 42375. [AgC <sub>17</sub> H <sub>12</sub> N <sub>6</sub> ] <sub>n</sub> ReO <sub>4</sub>                                                  |
| RAGWIH   | 1.727 Å | Baidina, I. A.; Vorob'eva, S. N.; Smolentsev, A. I.; Belyaev, A. V. <i>Russ. J. Struct. Chem.</i> <b>2011</b> , <i>52</i> , 137. [RhCl <sub>2</sub> (H <sub>2</sub> N(CH <sub>2</sub> ) <sub>2</sub> NH <sub>2</sub> ) <sub>2</sub> ]ReO <sub>4</sub>                                                              |
| WIHNAD   | 1.727 Å | Grigoriev, M. S.; German, K. E.; Maruk, A. Y. <i>Acta Crystallogr., Sect. E</i> <b>2007</b> , <i>63</i> , m2061. (C(NH <sub>2</sub> ) <sub>3</sub> )ReO <sub>4</sub>                                                                                                                                               |
| WONPEU   | 1.727 Å | Thuery, P.; Nierlich, M.; Asfari, Z.; Vicens, J.; Dozol, J.-F. <i>Polyhedron</i> <b>2000</b> , <i>19</i> , 1749. Cs <sub>2</sub> (ReO <sub>4</sub> ) <sub>2</sub> ·C <sub>48</sub> H <sub>60</sub> O <sub>12</sub> ]·1.5H <sub>2</sub> O                                                                           |
| GEWNEF   | 1.728 Å | Badea, D.; Karpov, A.; Jansen, M.; Bruns, J. Z. <i>Anorg. Allg. Chem.</i> <b>2022</b> , <i>648</i> , e202200267. [Ag <sub>2</sub> C <sub>4</sub> H <sub>16</sub> N <sub>4</sub> ] <sub>n</sub> (ReO <sub>4</sub> ) <sub>2</sub>                                                                                    |
| 78831    | 1.728 Å | Atzendorfer, A.; Range, K. J. Z. <i>Naturforsch., Sect B</i> <b>1995</b> , <i>50</i> , 1417. NaReO <sub>4</sub>                                                                                                                                                                                                    |
| 139285   | 1.728 Å | Charkin, D. O.; Chachin, P. A.; Nazarchuk, E. V.; Siidra, O. I. Z. <i>Kristallogr. – New. Struct.</i> <b>2023</b> , <i>238</i> , 1. NaSr(ReO <sub>4</sub> ) <sub>3</sub>                                                                                                                                           |
| 237299   | 1.728 Å | Ivanova, M. V.; Kochner, T.; Mercier, He. P. A.; Schrobilgen, G. J. <i>Inorg. Chem.</i> <b>2013</b> , <i>52</i> , 6806. (CH <sub>3</sub> ) <sub>4</sub> N)ReO <sub>4</sub>                                                                                                                                         |
| DIPREC   | 1.728 Å | Ueda, M.; Shirahata, T.; Misaki, Y. <i>Chem. Sel.</i> <b>2017</b> , <i>2</i> , 3490. (C <sub>40</sub> H <sub>20</sub> S <sub>10</sub> )(ReO <sub>4</sub> ) <sub>4</sub> ·CH <sub>3</sub> CN                                                                                                                        |
| DUGNIC01 | 1.728 Å | Ivanova, M. V.; Kochner, T.; Mercier, H. P. A.; Schrobilgen, G. J. <i>Inorg. Chem.</i> <b>2013</b> , <i>52</i> , 6806. ((CH <sub>3</sub> ) <sub>4</sub> N)ReO <sub>4</sub>                                                                                                                                         |
| GEMKIU   | 1.728 Å | Khramenko, S. P.; Bykova, E. A.; Alekseev, A. V.; Gromilov, S. A. <i>Russ. J. Struct. Chem.</i> <b>2012</b> , <i>53</i> , 520. [Pd(N <sub>2</sub> C <sub>8</sub> H <sub>16</sub> ) <sub>2</sub> ](ReO <sub>4</sub> ) <sub>2</sub>                                                                                  |
| HODHER   | 1.728 Å | Novikov, A. P.; Safonov, A. V.; German, K. E.; Grigoriev, M. S. <i>CrystEngComm</i> <b>2024</b> , <i>26</i> , 31. (C <sub>6</sub> H <sub>10</sub> N <sub>3</sub> O <sub>2</sub> )ReO <sub>4</sub>                                                                                                                  |
| ZUFYOR   | 1.728 Å | Oliveira, S.; Goncalves, A. C.; Oliveira, G.; Gunther, D.; Rohwer, A.; Gama, V.; Lopes, E. B.; Santos, I. C.; Rabaca, S.; Almeida, M.; Dressel, M. <i>Crystals</i> <b>2019</b> , <i>9</i> , 608. (C <sub>13</sub> H <sub>7</sub> NS <sub>6</sub> )ReO <sub>4</sub> ·C <sub>13</sub> H <sub>7</sub> NS <sub>6</sub> |
| 56322    | 1.729 Å | Saura-Múzquiz, Matilde; Mullens, Bryce G.; Avdeev, Max; Jharapla, Prathap K.; Vaitheeswaran, G.; Gupta, M.K.; Mittal, R.; Kennedy, Brendan J. <i>J. Solid State Chem.</i> <b>2022</b> , <i>315</i> , 123531. NH <sub>4</sub> ReO <sub>4</sub>                                                                      |
| 66755    | 1.729 Å | Macicek, J.; Angelova, O.; Petrova, R. Z. <i>Kristallogr.</i> <b>1995</b> , <i>210</i> , 24. Ba(ReO <sub>4</sub> ) <sub>2</sub> ·3OC(NH <sub>2</sub> ) <sub>2</sub>                                                                                                                                                |

|        |         |                                                                                                                                                                                                                                                                                                                                                                                        |
|--------|---------|----------------------------------------------------------------------------------------------------------------------------------------------------------------------------------------------------------------------------------------------------------------------------------------------------------------------------------------------------------------------------------------|
| 169583 | 1.729 Å | Khramenko, S. P.; Shusharina, E. A.; Gromilov, S. A.; Smolentsev, A. I. <i>J. Struct. Chem.</i> <b>2009</b> , <i>50</i> , 1201. [Cu(NH <sub>3</sub> ) <sub>4</sub> ](ReO <sub>4</sub> ) <sub>2</sub>                                                                                                                                                                                   |
| AHIQUE | 1.729 Å | Thuery, P. <i>Inorg. Chem.</i> <b>2009</b> , <i>48</i> , 4497. [Ce <sub>2</sub> ReC <sub>36</sub> H <sub>46</sub> N <sub>27</sub> O <sub>30</sub> ] <sub>n</sub> (ReO <sub>4</sub> ) <sub>2</sub> ·2H <sub>2</sub> O                                                                                                                                                                   |
| BEZTIN | 1.729 Å | Daolio, A.; Pizzi, A.; Calabrese, M.; Demitri, N.; Murray, J. S.; Politzer, P.; Resnati, G. <i>Cryst. Growth Des.</i> <b>2023</b> , <i>23</i> , 574. (C <sub>5</sub> H <sub>11</sub> O <sub>2</sub> S)ReO <sub>4</sub>                                                                                                                                                                 |
| BOCZEC | 1.729 Å | Kazakova, A. A.; Kubasov, A. S.; Chizhov, A. O.; Novikov, A. P.; Volkov, M. A.; Borisov, A. V.; Nenajdenko, V. G.; Dukhnovsky, E. A.; Bely, A. E.; Grishina, M. M.; Kritchenkov, A. S.; Gomila, R. M.; Frontera, A.; Tskhovrebov, A. G. <i>Inorg. Chim. Acta</i> <b>2024</b> , <i>563</i> , 121929. (C <sub>11</sub> H <sub>9</sub> N <sub>3</sub> Se)(ReO <sub>4</sub> ) <sub>2</sub> |
| MAJPAP | 1.729 Å | Holynska, M.; Lis, T. <i>Acta Crystallogr., Sect. C</i> <b>2004</b> , <i>60</i> , m648. (PC <sub>2</sub> H <sub>5</sub> (C <sub>6</sub> H <sub>5</sub> ) <sub>3</sub> )ReO <sub>4</sub>                                                                                                                                                                                                |
| NOXLOD | 1.729 Å | Massena, C. J.; Riel, A. M. S.; Neuhaus, G. F.; Decato, D. A.; Berryman, O. B. <i>Chem. Commun.</i> <b>2015</b> , <i>51</i> , 1417. (C <sub>22</sub> H <sub>18</sub> N <sub>2</sub> )(ReO <sub>4</sub> ) <sub>2</sub>                                                                                                                                                                  |
| SELSOR | 1.729 Å | Newcomb, T. P.; Godfrey, M. R.; Hoffman, B. M.; Ibers, J. A. <i>Inorg. Chem.</i> <b>1990</b> , <i>29</i> , 223. [Ni(N <sub>4</sub> CF <sub>24</sub> H <sub>20</sub> )](ReO <sub>4</sub> ) <sub>2</sub> ·[Ni(N <sub>4</sub> CF <sub>24</sub> H <sub>20</sub> )]                                                                                                                         |
| 429650 | 1.730 Å | Gromilov, S. A.; Khramenko, S. P.; Piryazev, D. A.; Kuratieva, N. V. <i>J. Struct. Chem.</i> <b>2016</b> , <i>57</i> , 725.                                                                                                                                                                                                                                                            |
| BOCZIG | 1.730 Å | Kazakova, A. A.; Kubasov, A. S.; Chizhov, A. O.; Novikov, A. P.; Volkov, M. A.; Borisov, A. V.; Nenajdenko, V. G.; Dukhnovsky, E. A.; Bely, A. E.; Grishina, M. M.; Kritchenkov, A. S.; Gomila, R. M.; Frontera, A.; Tskhovrebov, A. G. <i>Inorg. Chim. Acta</i> <b>2024</b> , <i>563</i> , 121929. (C <sub>11</sub> H <sub>9</sub> N <sub>3</sub> Se)(ReO <sub>4</sub> ) <sub>2</sub> |
| YEJZEW | 1.730 Å | Artemjev, A. A.; Novikov, A. P.; Burkin, G. M.; Sapronov, A. A.; Kubasov, A. S.; Nenajdenko, V. G.; Khrustalev, V. N.; Borisov, A. V.; Kirichuk, A. A.; Kritchenkov, A. S.; Gomila, R. M.; Frontera, A.; Tskhovrebov, A. G. <i>Int. J. Mol. Sci.</i> <b>2022</b> , <i>23</i> , 6372. (C <sub>7</sub> H <sub>6</sub> FN <sub>2</sub> Se)ReO <sub>4</sub>                                |
| 73083  | 1.730 Å | Rögner, P.; Range, K. J. <i>Z. Anorg. Allg. Chem.</i> <b>1993</b> , <i>619</i> , 1017. TlReO <sub>4</sub>                                                                                                                                                                                                                                                                              |
| MAPHUH | 1.730 Å | Kochel, A. <i>Acta Crystallogr., Sect. E</i> <b>2005</b> , <i>61</i> , m1368. (C <sub>12</sub> H <sub>13</sub> N <sub>2</sub> ) <sub>2</sub> (I <sub>3</sub> )ReO <sub>4</sub>                                                                                                                                                                                                         |
| QAXJEE | 1.730 Å | Andersen, P.; Galsbøl, F.; Jensen, A. F.; Matsui, H.; Monsted, L.; Simonsen, K. <i>Acta Chem. Scand.</i> <b>1999</b> , <i>53</i> , 1093. [Rh(N <sub>3</sub> C <sub>8</sub> H <sub>21</sub> ) <sub>2</sub> ](ReO <sub>4</sub> ) <sub>3</sub> ·1.2 H <sub>2</sub> O                                                                                                                      |
| QAGPOG | 1.730 Å | Castilla, A. M.; Ronson, T. K.; Nitschke, J. R. <i>J. Am. Chem. Soc.</i> <b>2016</b> , <i>138</i> , 2342. [Zn <sub>4</sub> C <sub>120</sub> H <sub>108</sub> N <sub>28</sub> ]ReO <sub>4</sub> (N(SO <sub>2</sub> CF <sub>3</sub> ) <sub>2</sub> ) <sub>7</sub>                                                                                                                        |
| TOBBOC | 1.730 Å | Bushuev, M. B.; Lavrenova, L. G.; Shvedenkov, Y. G.; Virovets, A. V.; Sheludyakova, L. A.; Larionov, S. V. <i>Russ. J. Inorg. Chem.</i> <b>2007</b> , <i>52</i> , 51. [Fe <sub>3</sub> C <sub>30</sub> H <sub>66</sub> N <sub>18</sub> O <sub>6</sub> ](ReO <sub>4</sub> ) <sub>6</sub> ·H <sub>2</sub> O                                                                              |
| YIJYIX | 1.730 Å | Grigoriev, M. S.; German, K. E.; Maruk, A. Y. <i>Acta Crystallogr., Sect. E</i> <b>2007</b> , <i>63</i> , m2355. (C <sub>4</sub> H <sub>10</sub> NO)ReO <sub>4</sub>                                                                                                                                                                                                                   |
| 5915   | 1.731 Å | Chay, C.; Avdeev, M.; Brand, H. E. A.; Injac, S.; Whittle, T. A.; Kennedy, B. J. <i>Dalton Trans.</i> <b>2019</b> , <i>48</i> , 17524. NaReO <sub>4</sub>                                                                                                                                                                                                                              |



|        |         |                                                                                                                                                                                                                                                                                                                                                                       |
|--------|---------|-----------------------------------------------------------------------------------------------------------------------------------------------------------------------------------------------------------------------------------------------------------------------------------------------------------------------------------------------------------------------|
| GEMKAM | 1.731 Å | Khramenko, S. P.; Bykova, E. A.; Alekseev, A. V.; Gromilov, S. A. <i>Russ. J. Struct. Chem.</i> <b>2012</b> , <i>53</i> , 520.<br>[Pd(NH <sub>2</sub> (CH <sub>2</sub> ) <sub>2</sub> NH <sub>2</sub> ) <sub>2</sub> ](ReO <sub>4</sub> ) <sub>2</sub>                                                                                                                |
| VISXEE | 1.731 Å | Volkov, M. A.; Novikov, A. P.; Borisova, N. E.; Grigoriev, M. S.; German, K. E. <i>Inorg. Chem.</i> <b>2023</b> , <i>62</i> , 13485. (C <sub>3</sub> H <sub>5</sub> N <sub>2</sub> )ReO <sub>4</sub>                                                                                                                                                                  |
| RARDIY | 1.731 Å | Hamilton, B. H.; Wagler, T. A.; Espe, M. P.; Ziegler, C. J. <i>Inorg. Chem.</i> <b>2005</b> , <i>44</i> , 4891.<br>[PbC <sub>12</sub> H <sub>12</sub> BN <sub>8</sub> ] <sub>n</sub> ReO <sub>4</sub>                                                                                                                                                                 |
| UJECOC | 1.731 Å | Ashizawa, M.; Ishidzu, K.; Watanabe, M.; Tanahashi, T. Shirahata, T. Kawamoto, T.; Mori, T.; Misaki, Y. <i>Chem. Lett.</i> <b>2010</b> , <i>39</i> , 1093. (C <sub>10</sub> H <sub>10</sub> S <sub>4</sub> Se <sub>4</sub> )ReO <sub>4</sub>                                                                                                                          |
| 72503  | 1.732 Å | Brown, J. C.; Powell, B. M.; Stuart, S. N. <i>Acta Crystallogr., Sect. C</i> <b>1993</b> , <i>49</i> , 214. KReO <sub>4</sub>                                                                                                                                                                                                                                         |
| NAPWEK | 1.732 Å | Daolio, A.; Pizzi, A.; Terraneo, G.; Frontera, A.; Resnati, G. <i>ChemPhysChem</i> <b>2021</b> , <i>22</i> , 2281.<br>(CH <sub>3</sub> NCH <sub>2</sub> COOH)ReO <sub>4</sub> ·H <sub>2</sub> O                                                                                                                                                                       |
| YEJYAR | 1.732 Å | Artemjev, A. A.; Novikov, A. P.; Burkin, G. M.; Sapronov, A. A.; Kubasov, A. S.; Nenajdenko, V. G.; Khrustalev, V. N.; Borisov, A. V.; Kirichuk, A. A.; Kritchenkov, A. S.; Gomila, R. M. Frontera, A.; Tskhovrebov, A. G. <i>Int. J. Mol. Sci.</i> <b>2022</b> , <i>23</i> , 6372. (C <sub>7</sub> H <sub>4</sub> Cl <sub>3</sub> N <sub>2</sub> Se)ReO <sub>4</sub> |
| YEBZEM | 1.732 Å | Furuta, K.; Kohno, S.; Shirahata, T.; Yamasaki, K.; Hino, S.; Misaki, Y. <i>Crystals</i> <b>2012</b> , <i>2</i> , 393.<br>(C <sub>12</sub> H <sub>10</sub> S <sub>6</sub> Se <sub>2</sub> )ReO <sub>4</sub> ·0.5H <sub>2</sub> O                                                                                                                                      |
| 72957  | 1.733 Å | Powell, B. M.; Brown, R. J. C.; Harnden, A. M. C.; Reid, J. K. <i>Acta Crystallogr., Sect. B</i> <b>1993</b> , <i>49</i> , 463.<br>ND <sub>4</sub> ReO <sub>4</sub>                                                                                                                                                                                                   |
| ZIJGEE | 1.733 Å | Hao, L.; Vittal, J. J.; Puddephatt, R. J.; Manojlovic-Muir, L.; Muir, K. W. <i>Chem. Commun.</i> <b>1995</b> , 2381.<br>[Pt <sub>4</sub> C <sub>76</sub> H <sub>133</sub> O <sub>4</sub> P <sub>4</sub> ] <sub>n</sub> ReO <sub>4</sub>                                                                                                                               |
| 20777  | 1.734 Å | Matveeva, R. G.; Ilyukhin, V. V.; Varfolomeev, M. B.; Belov, N. V. <i>Dokl. Akda. Nauk SSSR</i> <b>1980</b> , <i>252</i> , 99. Ca(ReO <sub>4</sub> ) <sub>2</sub> ·2H <sub>2</sub> O                                                                                                                                                                                  |
| 77921  | 1.734 Å | Swainson, I. P.; Brown, R. J. C. <i>Acta Crystallogr., Sect. B</i> <b>1997</b> , <i>53</i> , 78. ND <sub>4</sub> ReO <sub>4</sub>                                                                                                                                                                                                                                     |
| AHIRIT | 1.734 Å | Thuery, P. <i>Inorg. Chem.</i> <b>2009</b> , <i>48</i> , 4497. [Sm <sub>4</sub> Re <sub>4</sub> C <sub>72</sub> H <sub>100</sub> N <sub>52</sub> O <sub>66</sub> ] <sub>n</sub> (ReO <sub>4</sub> ) <sub>4</sub> ·6H <sub>2</sub> O                                                                                                                                   |
| EZUGUD | 1.734 Å | Ueda, M.; Tahara, A.; Shirahata, T.; Misaki, Y. <i>Bull. Chem. Soc. Jpn.</i> <b>2016</b> , <i>89</i> , 1500.<br>(C <sub>33</sub> H <sub>16</sub> OS <sub>8</sub> )(ReO <sub>4</sub> ) <sub>2</sub> ·1.5CH <sub>3</sub> CN·0.35H <sub>2</sub> O                                                                                                                        |
| IJINIZ | 1.734 Å | Berthet, J. C.; Thuery, P.; Ephritikhine, M. CCDC deposition number 729252, <b>2009</b> .<br>(H <sub>3</sub> O)ReO <sub>4</sub> ·C <sub>42</sub> H <sub>42</sub> N <sub>28</sub> O <sub>14</sub> ·6H <sub>2</sub> O                                                                                                                                                   |
| NOVKIV | 1.734 Å | Louis-Jean, J.; Jang, H.; Lawler, K. V.; Forster, P. M.; Ash, J.; Poineau, F. <i>Inorg. Chim. Acta</i> <b>2019</b> , <i>498</i> , 119121. (C <sub>6</sub> H <sub>6</sub> N <sub>3</sub> )ReO <sub>4</sub>                                                                                                                                                             |
| PAXQIO | 1.734 Å | Sharma, C. V. K.; Griffin, S. T.; Rogers, R. D. <i>Chem Commun.</i> <b>1998</b> , 215; Sharma, C. V. K.; Rogers, R. D. <i>Cryst. Eng.</i> <b>1998</b> , <i>1</i> , 19. [Ag <sub>4</sub> C <sub>16</sub> H <sub>16</sub> N <sub>8</sub> O <sub>8</sub> ](ReO <sub>4</sub> ) <sub>2</sub>                                                                               |
| PUQJAN | 1.734 Å | Thuery, P.; Masci, B. <i>Cryst. Growth Des.</i> <b>2010</b> , <i>10</i> , 716. [UO <sub>2</sub> (NO <sub>3</sub> )(H <sub>2</sub> O)(OC <sub>42</sub> H <sub>46</sub> N <sub>28</sub> O <sub>14</sub> )] <sub>n</sub> ReO <sub>4</sub> ·5H <sub>2</sub> O                                                                                                             |

|          |         |                                                                                                                                                                                                                                                                                                                 |
|----------|---------|-----------------------------------------------------------------------------------------------------------------------------------------------------------------------------------------------------------------------------------------------------------------------------------------------------------------|
| 73559    | 1.736 Å | Varfolomeev, M. B.; Samarj, N. B.; Fuchs, J.; Lunk, H. J. <i>J. Alloys Compds.</i> <b>1993</b> , <i>201</i> , 261. Sr(ReO <sub>4</sub> ) <sub>2</sub> ·1.5 H <sub>2</sub> O                                                                                                                                     |
| 112619   | 1.737 Å | Charkin, D. O.; Siidra, O. I.; Plokhikh, I. V.; Borisov, A. S.; Markovski, M. R. <i>Solid State Sci.</i> <b>2021</b> , <i>114</i> , 106576. Ba <sub>2</sub> ReO <sub>4</sub> Br <sub>2</sub>                                                                                                                    |
| KETCOB   | 1.738 Å | Burkert, P. K.; Grommelt, M.; Pietrass, T.; Lachmann, J.; Muller, G. <i>Z. Naturforsch., Sect. B</i> <b>1990</b> , <i>45</i> , 725. (Sb(CH <sub>3</sub> ) <sub>4</sub> )ReO <sub>4</sub>                                                                                                                        |
| VUPREG   | 1.743 Å | Wang, X.; Hu, X.; Song, L.; Yang, X.; Xiao, Q.; Xu, H.; Ding, S. <i>J. Mol. Struct.</i> <b>2020</b> , <i>1216</i> , 128330. (C <sub>32</sub> H <sub>66</sub> N <sub>8</sub> O <sub>4</sub> )(ReO <sub>4</sub> ) <sub>2</sub>                                                                                    |
| 424948   | 1.744 Å | Khramenko; S. P.; Bykova; E. A.; Yusenko; K. V.; Tyutyunnik; A. P.; Gromilov, S. A. <i>J. Struct. Chem.</i> <b>2013</b> , <i>54</i> , 931. [Ir(NH <sub>3</sub> ) <sub>6</sub> ](ReO <sub>4</sub> ) <sub>3</sub> ·2H <sub>2</sub> O                                                                              |
| AHIROZ   | 1.745 Å | Thuery, P. <i>Inorg. Chem.</i> <b>2009</b> , <i>48</i> , 4497. [Gd <sub>2</sub> Re <sub>4</sub> C <sub>36</sub> H <sub>48</sub> N <sub>24</sub> O <sub>34</sub> ] <sub>n</sub> (ReO <sub>4</sub> ) <sub>2</sub> ·H <sub>2</sub> O                                                                               |
| DXENRD   | 1.745 Å | Głowiak, T.; Kubiak, M.; Jezowska-Trzebiatowska, B. <i>Bull. Acad. Pol. Sci., Ser. Sci. Chim.</i> <b>1977</b> , <i>25</i> , 271. [Re(O) <sub>2</sub> (H <sub>2</sub> N(CH <sub>2</sub> ) <sub>2</sub> NH <sub>2</sub> ) <sub>2</sub> ] <sub>2</sub> ReO <sub>4</sub>                                            |
| RENHUQ   | 1.750 Å | Sheng, D.; Zhu, L.; Xu, C.; Xiao, C.; Wang, Y.; Wang, Y.; Chen, L.; Diwu, J.; Chen, J.; Chai, Z.; Albrecht-Schmitt, T. E.; Wang, S. <i>Environ. Sci. Tech.</i> <b>2017</b> , <i>51</i> , 3471. [Ag <sub>4</sub> C <sub>74</sub> H <sub>56</sub> N <sub>16</sub> ] <sub>n</sub> (ReO <sub>4</sub> ) <sub>4</sub> |
| 1512     | 1.751 Å | Sivestre, J. P. F.; Durif, A. <i>J. Solid State Chem.</i> <b>1978</b> , <i>24</i> , 97. K <sub>3</sub> (MoO <sub>4</sub> )(ReO <sub>4</sub> )                                                                                                                                                                   |
| 23279    | 1.752 Å | Brown, R. J. C.; Segel, S. L. <i>Acta Crystallogr., Sect. B</i> <b>1980</b> , <i>36</i> , 2195. ND <sub>4</sub> ReO <sub>4</sub>                                                                                                                                                                                |
| 138806   | 1.753 Å | Griesemer, S. D.; Ward, L.; Wolverson, C. <i>Phys. Rev. Miner.</i> <b>2021</b> , <i>5</i> , 105003. Ba(ReO <sub>4</sub> ) <sub>2</sub>                                                                                                                                                                          |
| XUDMIS04 | 1.758 Å | Ng, S. K.; Xie, Z.-X. <i>Chin. J. Struct. Chem.</i> <b>2003</b> , <i>22</i> , 691. [C <sub>5</sub> H <sub>6</sub> N]ReO <sub>4</sub>                                                                                                                                                                            |
| RUJVUO   | 1.762 Å | Vasil'chenko, D. B.; Baidina, I. A.; Filatov, E. Y.; Korenev, S. V. <i>Russ J. Struct. Chem.</i> <b>2009</b> , <i>50</i> , 349. [RhCl <sub>2</sub> (NC <sub>5</sub> H <sub>5</sub> ) <sub>4</sub> ] <sub>2</sub> ReO <sub>4</sub>                                                                               |
| SADTEA   | 1.763 Å | Lee, J.; Lim, S.; Kim, D.; Jung, O.-K.; Lee, Y.-A. <i>Dalton Trans.</i> <b>2020</b> , <i>49</i> , 15002. [Pd <sub>2</sub> C <sub>64</sub> H <sub>96</sub> N <sub>8</sub> Si <sub>8</sub> ](ReO <sub>4</sub> ) <sub>4</sub> ·CH <sub>3</sub> OH                                                                  |
| QOWMUK   | 1.766 Å | Yamashita, Y.; Tomura, M.; Imaeda, K. <i>Tetrahedron Lett.</i> <b>2001</b> , <i>42</i> , 4191. [C <sub>24</sub> H <sub>18</sub> O <sub>2</sub> S <sub>8</sub> ] <sub>2</sub> ReO <sub>4</sub> ·8H <sub>2</sub> O                                                                                                |
| 25832    | 1.769 Å | Morrow, J. C. <i>Acta Crystallogr.</i> <b>1960</b> , <i>13</i> , 443. KReO <sub>4</sub>                                                                                                                                                                                                                         |
| NIXXAX   | 1.775 Å | Xu, Y.; Calabrese, M.; Demitri, N.; Pizzi, A.; Nag, T.; Hung, I.; Gan, Z.; Resnati, G.; Bryce, D. L. <i>Chem. Commun.</i> <b>2023</b> , <i>59</i> , 12609. (C <sub>7</sub> H <sub>16</sub> NO <sub>2</sub> )ReO <sub>4</sub>                                                                                    |

**Mean 1.710 Å/442 structures**
